# Supplementary material for: Disclosing the microscopic mechanism and adsorption properties of CO2 capture in N-isopropylethylenediamine appended M2(dobpdc) series
Source: Royal Society of Chemistry journal article supplement (doi:10.1039/d0cp04068a), 2020-01-01
Supplement: d0cp04068a1.pdf [file d0cp04068a1.pdf]

## Supporting Information

# Disclosing the Microscopic Mechanism and Adsorption Properties of CO<sub>2</sub> Capture in N-isopropylethylenediamine Appended M<sub>2</sub>(dobpdc) Series

Hui Zhang,<sup>1</sup> Li-Ming Yang,\*<sup>1</sup> Hui Pan,<sup>2</sup> and Eric Ganz<sup>3</sup>

<sup>1</sup>School of Chemistry and Chemical Engineering, Huazhong University of Science and Technology, Wuhan 430074, China. <sup>2</sup>Joint Key Laboratory of the Ministry of Education, Institute of Applied Physics and Materials Engineering; Department of Physics and Chemistry, Faculty of Science and Technology, University of Macau, Macao SAR, P. R. China. <sup>3</sup>School of Physics and Astronomy, University of Minnesota, 116 Church St. SE, Minneapolis, Minnesota 55455, USA. (email: [Lmyang@hust.edu.cn](mailto:Lmyang@hust.edu.cn), [Lmyang.uio@gmail.com](mailto:Lmyang.uio@gmail.com))

**Table S1.** The calculated total energies E (eV) of nonmagnetic (NM), ferromagnetic (FM) and antiferromagnetic (AFM) states, magnetic moment ( $\mu_B$ ) on each metal atom, and total magnetic moment ( $M_{tot}$ ) per unit cell of bare M<sub>2</sub>(dobpdc), i-2-M<sub>2</sub>(dobpdc) and CO<sub>2</sub>-i-2-M<sub>2</sub>(dobpdc) (M=Mg, Sc-Zn).

|           |           | bare M <sub>2</sub> (dobpdc) |            |            | i-2-M <sub>2</sub> (dobpdc) |            |            | CO <sub>2</sub> -i-2-M <sub>2</sub> (dobpdc) |            |            |
|-----------|-----------|------------------------------|------------|------------|-----------------------------|------------|------------|----------------------------------------------|------------|------------|
|           |           | NM                           | FM         | AFM        | NM                          | FM         | AFM        | NM                                           | FM         | AFM        |
| <b>Mg</b> | E         | -602.63861                   | —          | —          | -717.99188                  | —          | —          | -741.62403                                   | —          | —          |
| <b>Sc</b> | 1         | 0                            | 0.763      | 0.763      | 0                           | 0.706      | 0.705      | 0                                            | 0.755      | 0.755      |
|           | 2         | 0                            | 0.764      | 0.764      | 0                           | 0.758      | 0.758      | 0                                            | 0.619      | 0.619      |
|           | 3         | 0                            | 0.764      | 0.764      | 0                           | 0.514      | 0.513      | 0                                            | 0.085      | 0.085      |
|           | 4         | 0                            | 0.763      | -0.763     | 0                           | 0.754      | -0.754     | 0                                            | 0.73       | -0.73      |
|           | 5         | 0                            | 0.764      | -0.764     | 0                           | 0.756      | -0.756     | 0                                            | 0.76       | -0.76      |
|           | 6         | 0                            | 0.764      | -0.764     | 0                           | 0.749      | -0.749     | 0                                            | 0.76       | -0.76      |
|           | $M_{tot}$ | 0                            | 5.039      | 0          | 0                           | 4.856      | -0.2       | 0                                            | 4.708      | -0.321     |
|           | E         | -617.18732                   | -618.18644 | -618.18536 | -732.45058                  | -733.48321 | -733.48201 | -756.57349                                   | -757.15017 | -757.14906 |
| <b>Ti</b> | 1         | 0                            | 1.698      | 1.698      | 0                           | 1.671      | 1.669      | 0                                            | 1.671      | 1.673      |
|           | 2         | 0                            | 1.698      | 1.698      | 0                           | 1.672      | 1.672      | 0                                            | 1.655      | 1.683      |
|           | 3         | 0                            | 1.698      | 1.698      | 0                           | 1.621      | 1.622      | 0                                            | 1.591      | 1.589      |
|           | 4         | 0                            | 1.698      | -1.698     | 0                           | 1.694      | -1.694     | 0                                            | 1.692      | -1.691     |
|           | 5         | 0                            | 1.698      | -1.698     | 0                           | 1.696      | -1.696     | 0                                            | 1.698      | -1.698     |
|           | 6         | 0                            | 1.698      | -1.698     | 0                           | 1.695      | -1.696     | 0                                            | 1.693      | -1.694     |
|           | $M_{tot}$ | 0                            | 10.644     | 0          | 0                           | 10.574     | -0.059     | 0                                            | 10.559     | -0.058     |
|           | E         | -621.15931                   | -623.67881 | -623.67909 | -736.54050                  | -739.06248 | -739.05951 | -760.06054                                   | -762.55774 | -762.53817 |
| <b>V</b>  | 1         | 0                            | 2.828      | 2.828      | 0                           | 2.822      | 2.808      | 0                                            | 2.822      | 2.815      |

|    |                  |            |            |            |            |            |            |            |            |            |
|----|------------------|------------|------------|------------|------------|------------|------------|------------|------------|------------|
|    | 2                | 0          | 2.828      | 2.828      | 0          | 2.826      | 2.814      | 0          | 2.826      | 2.815      |
|    | 3                | 0          | 2.828      | 2.828      | 0          | 2.822      | -0.961     | 0          | 2.823      | -0.989     |
|    | 4                | 0          | 2.828      | -2.828     | 0          | 2.828      | -2.828     | 0          | 2.828      | -2.828     |
|    | 5                | 0          | 2.828      | -2.828     | 0          | 2.827      | -2.827     | 0          | 2.827      | -2.828     |
|    | 6                | 0          | 2.828      | -2.828     | 0          | 2.828      | -2.828     | 0          | 2.827      | -2.827     |
|    | M <sub>tot</sub> | 0          | 17.005     | 0          | 0          | 16.993     | -3.808     | 0          | 17         | -3.812     |
|    | E                | -610.93827 | -623.01889 | -623.01893 | -726.67462 | -738.55029 | -737.75614 | -750.09828 | -762.05027 | -761.25830 |
| Cr | 1                | 0          | 3.823      | 3.823      | 0          | 3.823      | 3.823      | 0          | 3.822      | 3.822      |
|    | 2                | 0          | 3.823      | 3.823      | 0          | 3.823      | 3.823      | 0          | 3.822      | 3.822      |
|    | 3                | 0          | 3.823      | 3.823      | 0          | 3.82       | 3.82       | 0          | 3.824      | 3.824      |
|    | 4                | 0          | 3.823      | -3.823     | 0          | 3.824      | -3.824     | 0          | 3.823      | -3.823     |
|    | 5                | 0          | 3.823      | -3.823     | 0          | 3.824      | -3.824     | 0          | 3.824      | -3.824     |
|    | 6                | 0          | 3.823      | -3.823     | 0          | 3.823      | -3.823     | 0          | 3.822      | -3.821     |
|    | M <sub>tot</sub> | 0          | 22.805     | 0          | 0          | 22.825     | 0.017      | 0          | 22.834     | 0.029      |
| E  | -607.52638       | -625.94929 | -625.94915 | -722.84902 | -741.00324 | -741.00225 | -746.29439 | -764.53468 | -764.53550 |            |
| Mn | 1                | 0          | 4.632      | 4.632      | 0          | 4.629      | 4.629      | 0          | 4.631      | 4.633      |
|    | 2                | 0          | 4.632      | 4.632      | 0          | 4.634      | 4.633      | 0          | 4.632      | 4.639      |
|    | 3                | 0          | 4.631      | 4.632      | 0          | 4.643      | 4.643      | 0          | 4.645      | 4.637      |
|    | 4                | 0          | 4.632      | -4.632     | 0          | 4.631      | -4.63      | 0          | 4.631      | -4.631     |
|    | 5                | 0          | 4.632      | -4.632     | 0          | 4.633      | -4.632     | 0          | 4.633      | -4.632     |
|    | 6                | 0          | 4.631      | -4.632     | 0          | 4.631      | -4.63      | 0          | 4.63       | -4.63      |
|    | M <sub>tot</sub> | 0          | 28.564     | 0          | 0          | 28.581     | 0.013      | 0          | 28.589     | 0.012      |
| E  | -601.23761       | -624.33141 | -624.33617 | -716.52826 | -739.62940 | -739.62594 | -739.89192 | -763.19802 | -763.19305 |            |
| Fe | 1                | 0          | 3.735      | 3.735      | 0          | 3.735      | 3.735      | 0          | 3.734      | 3.733      |
|    | 2                | 0          | 3.735      | 3.735      | 0          | 3.735      | 3.734      | 0          | 3.731      | 3.731      |
|    | 3                | 0          | 3.735      | 3.735      | 0          | 3.751      | 3.75       | 0          | 3.759      | 3.758      |
|    | 4                | 0          | 3.735      | -3.735     | 0          | 3.735      | -3.734     | 0          | 3.735      | -3.735     |
|    | 5                | 0          | 3.735      | -3.735     | 0          | 3.737      | -3.736     | 0          | 3.737      | -3.737     |
|    | 6                | 0          | 3.735      | -3.735     | 0          | 3.734      | -3.734     | 0          | 3.734      | -3.734     |
|    | M <sub>tot</sub> | 0          | 23.386     | 0          | 0          | 23.402     | 0.016      | 0          | 23.407     | 0.022      |
| E  | -600.67892       | -613.35593 | -613.34910 | -716.25356 | -728.68899 | -728.68698 | -739.59510 | -752.17401 | -752.17535 |            |
| Co | 1                | 0          | 2.688      | 2.687      | 0          | 2.688      | -0.999     | 0          | 2.687      | 1.004      |
|    | 2                | 0          | 2.688      | 2.687      | 0          | 2.688      | 2.691      | 0          | 2.682      | -0.995     |
|    | 3                | 0          | 2.688      | 2.687      | 0          | 2.717      | 2.712      | 0          | 2.731      | 2.729      |
|    | 4                | 0          | 2.688      | -2.687     | 0          | 2.685      | -2.684     | 0          | 2.686      | -2.684     |
|    | 5                | 0          | 2.688      | -2.687     | 0          | 2.689      | -2.688     | 0          | 2.691      | -2.688     |
|    | 6                | 0          | 2.688      | -2.687     | 0          | 2.686      | -2.683     | 0          | 2.685      | -2.684     |
|    | M <sub>tot</sub> | 0          | 17.533     | 0          | 0          | 17.549     | -3.886     | 0          | 17.552     | -5.82      |
| E  | -594.02985       | -603.13903 | -603.14027 | -709.49953 | -718.46554 | -717.90536 | -732.73641 | -741.91145 | -740.81157 |            |

|           |                  |            |            |            |            |            |            |            |            |            |
|-----------|------------------|------------|------------|------------|------------|------------|------------|------------|------------|------------|
| <b>Ni</b> | 1                | 0          | 1.792      | 1.792      | 0          | 1.793      | 1.793      | 0          | 1.791      | 1.791      |
|           | 2                | 0          | 1.792      | 1.792      | 0          | 1.795      | 1.794      | 0          | 1.790      | 1.790      |
|           | 3                | 0          | 1.792      | 1.792      | 0          | 1.797      | 1.797      | 0          | 1.813      | 1.813      |
|           | 4                | 0          | 1.792      | -1.792     | 0          | 1.791      | -1.791     | 0          | 1.791      | -1.791     |
|           | 5                | 0          | 1.792      | -1.792     | 0          | 1.792      | -1.792     | 0          | 1.792      | -1.792     |
|           | 6                | 0          | 1.792      | -1.792     | 0          | 1.791      | -1.790     | 0          | 1.790      | -1.790     |
|           | M <sub>tot</sub> | 0          | 11.840     | 0          | 0          | 11.845     | 0.007      | 0          | 11.857     | 0.019      |
|           | E                | -584.97719 | -590.44668 | -590.44764 | -700.26965 | -705.90009 | -705.90096 | -723.39517 | -729.31908 | -729.31941 |
| <b>Cu</b> | 1                | 0          | 0.614      | 0.612      | 0          | 0.615      | 0.612      | 0          | 0.618      | -0.616     |
|           | 2                | 0          | 0.614      | 0.612      | 0          | 0.615      | -0.609     | 0          | 0.615      | -0.612     |
|           | 3                | 0          | 0.614      | 0.612      | 0          | 0.652      | -0.648     | 0          | 0.653      | -0.651     |
|           | 4                | 0          | 0.614      | -0.612     | 0          | 0.612      | 0.612      | 0          | 0.613      | 0.611      |
|           | 5                | 0          | 0.614      | -0.612     | 0          | 0.613      | 0.612      | 0          | 0.614      | 0.612      |
|           | 6                | 0          | 0.614      | -0.612     | 0          | 0.613      | 0.611      | 0          | 0.614      | 0.612      |
|           | M <sub>tot</sub> | 0          | 5.617      | 0          | 0          | 5.623      | 1.863      | 0          | 5.629      | -0.015     |
|           | E                | -581.24204 | -583.03377 | -583.04411 | -696.07513 | -698.15057 | -698.15172 | -719.59135 | -721.55560 | -721.56716 |
| <b>Zn</b> | E                | -582.66110 | —          | —          | -698.20007 | —          | —          | -721.60287 | —          | —          |

**Table S2.** Computed lattice parameters ( $a$ ,  $b$ ,  $c$  in Å) and unit cell volumes ( $V$  in Å<sup>3</sup>) for M<sub>2</sub>(dobpdc), i-2-M<sub>2</sub>(dobpdc) and CO<sub>2</sub>-i-2-M<sub>2</sub>(dobpdc) (M=Mg, Sc-Zn).

| M  | bare   |       |          | i-2-MOF |        |       |          | CO <sub>2</sub> -i-2-MOF |        |       |          |
|----|--------|-------|----------|---------|--------|-------|----------|--------------------------|--------|-------|----------|
|    | $a=b$  | $c$   | $V$      | $a$     | $b$    | $c$   | $V$      | $a$                      | $b$    | $c$   | $V$      |
| Mg | 21.562 | 6.865 | 2763.185 | 21.007  | 22.096 | 6.828 | 2716.778 | 20.617                   | 22.199 | 6.844 | 2678.900 |
| Sc | 22.008 | 7.348 | 3079.520 | 21.700  | 22.405 | 7.258 | 2998.205 | 20.858                   | 22.610 | 7.243 | 2909.417 |
| Ti | 21.738 | 7.106 | 2905.493 | 21.302  | 22.230 | 7.054 | 2842.047 | 20.854                   | 22.297 | 7.059 | 2785.721 |
| V  | 21.667 | 7.058 | 2867.533 | 21.089  | 22.257 | 7.013 | 2810.950 | 21.040                   | 22.232 | 7.021 | 2769.176 |
| Cr | 21.874 | 6.534 | 2705.074 | 21.474  | 22.119 | 6.470 | 2650.100 | 21.090                   | 22.053 | 6.515 | 2607.962 |
| Mn | 21.761 | 7.028 | 2884.095 | 21.463  | 22.327 | 6.922 | 2823.934 | 20.925                   | 22.224 | 6.927 | 2759.851 |
| Fe | 21.709 | 6.859 | 2798.241 | 21.080  | 22.347 | 6.808 | 2742.601 | 20.631                   | 22.289 | 6.838 | 2688.097 |
| Co | 21.550 | 6.787 | 2727.426 | 21.035  | 22.041 | 6.777 | 2687.068 | 20.416                   | 22.058 | 6.796 | 2634.493 |
| Ni | 21.451 | 6.723 | 2677.874 | 20.812  | 22.061 | 6.707 | 2636.196 | 20.371                   | 22.000 | 6.729 | 2580.455 |
| Cu | 21.687 | 6.121 | 2491.816 | 21.222  | 21.799 | 6.191 | 2455.128 | 20.946                   | 21.744 | 6.196 | 2428.113 |
| Zn | 21.632 | 6.703 | 2714.944 | 21.338  | 22.025 | 6.391 | 2589.460 | 20.799                   | 21.942 | 6.490 | 2552.740 |



**Table S3.** The experimental values of lattice parameters ( $a$ ,  $b$ ,  $c$  in Å) and unit cell volumes ( $V$  in Å<sup>3</sup>) for available experimental structures of M<sub>2</sub>(dobpdc), i-2-M<sub>2</sub>(dobpdc) and CO<sub>2</sub>-i-2-M<sub>2</sub>(dobpdc) (M=Mg, Sc–Zn).

| M  | bare   |       |      | i-2-M  |       |      | CO <sub>2</sub> -i-2-M |       |      |
|----|--------|-------|------|--------|-------|------|------------------------|-------|------|
|    | $a=b$  | $c$   | V    | $a=b$  | $c$   | V    | $a=b$                  | $c$   | V    |
| Mg | 21.446 | 6.824 | 2718 | —      | —     | —    | —                      | —     | —    |
| Sc | —      | —     | —    | —      | —     | —    | —                      | —     | —    |
| Ti | —      | —     | —    | —      | —     | —    | —                      | —     | —    |
| V  | —      | —     | —    | —      | —     | —    | —                      | —     | —    |
| Cr | —      | —     | —    | —      | —     | —    | —                      | —     | —    |
| Mn | 21.629 | 6.958 | 2819 | —      | —     | —    | —                      | —     | —    |
| Fe | 21.848 | 6.814 | 2817 | —      | —     | —    | —                      | —     | —    |
| Co | 21.537 | 6.798 | 2731 | —      | —     | —    | —                      | —     | —    |
| Ni | 21.579 | 6.809 | 2745 | —      | —     | —    | —                      | —     | —    |
| Cu | —      | —     | —    | —      | —     | —    | —                      | —     | —    |
| Zn | 21.547 | 6.775 | 2724 | 21.682 | 6.874 | 2799 | 21.652                 | 6.839 | 2777 |

**Table S4.** The binding energies ( $E_b$ ) of i-2 with  $M_2(\text{dobpdc})$  and  $\text{CO}_2$  with i-2- $M_2(\text{dobpdc})$ , and the bond lengths (d) of M-N bond in i-2- $M_2(\text{dobpdc})$  and O-M bond in  $\text{CO}_2$ -i-2- $M_2(\text{dobpdc})$  (M=Mg, Sc-Zn).

| M  | $E_b$ (kJ/mol) |               | d (Å) |       |
|----|----------------|---------------|-------|-------|
|    | i-2            | $\text{CO}_2$ | M-N   | O-M   |
| Mg | 160.41         | 65.25         | 2.226 | 2.033 |
| Sc | 154.96         | 68.61         | 2.399 | 2.144 |
| Ti | 163.34         | 52.04         | 2.316 | 2.163 |
| V  | 177.60         | 52.49         | 2.260 | 2.153 |
| Cr | 131.53         | 55.53         | 2.349 | 2.312 |
| Mn | 155.08         | 59.12         | 2.268 | 2.116 |
| Fe | 158.46         | 51.05         | 2.224 | 2.113 |
| Co | 157.83         | 47.27         | 2.153 | 2.048 |
| Ni | 170.07         | 44.68         | 2.139 | 2.038 |
| Cu | 137.60         | 43.33         | 2.135 | 2.236 |
| Zn | 178.33         | 43.12         | 2.084 | 2.011 |

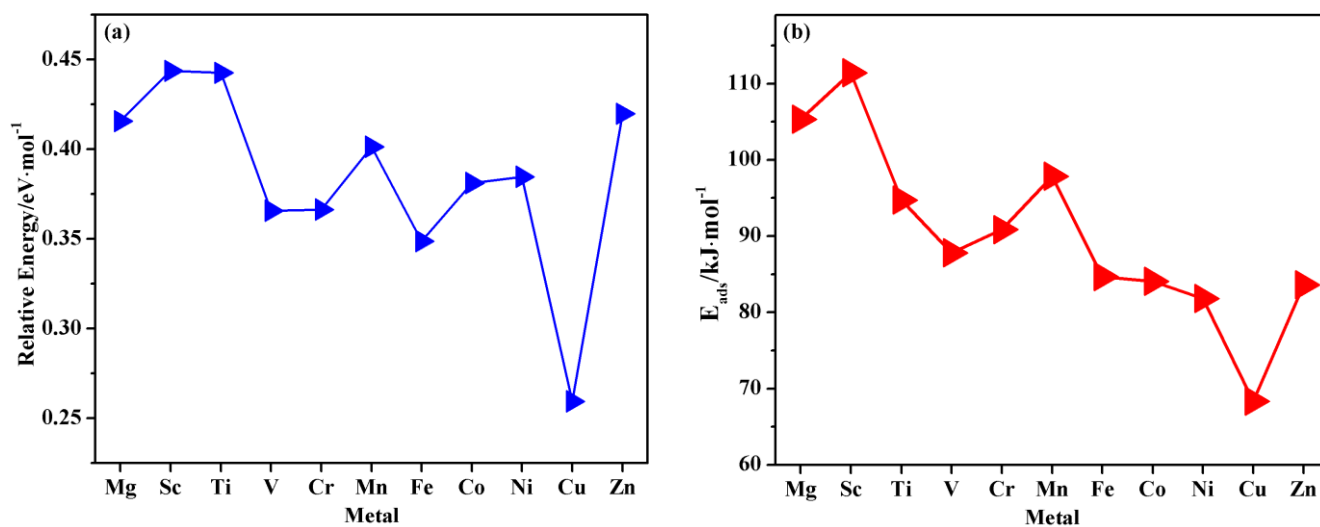

**Fig. S1.** (a) The relative energies of experimental motif  $\text{CO}_2\text{-i-2-M}_2(\text{dobpdc})\text{-I}$  (see Fig.3) and present study discovered more stable conformation  $\text{CO}_2\text{-i-2-M}_2(\text{dobpdc})\text{-II}$  ( $M=\text{Mg}, \text{Sc-Zn}$ ), and (b) the binding energies of  $\text{CO}_2$  in  $\text{i-2-M}_2(\text{dobpdc})$  ( $M=\text{Mg}, \text{Sc-Zn}$ ) for the more stable conformation.

**Table S5.** The binding energies ( $E_b$ ) and bond lengths of  $\text{O-M}$  bond ( $d_{\text{O-M}}$ ) in present study discovered more stable conformation  $\text{CO}_2\text{-i-2-M}_2(\text{dobpdc})\text{-II}$  (see Fig.3) ( $M=\text{Mg}, \text{Sc-Zn}$ ).

|                              | Mg     | Sc     | Ti    | V     | Cr    | Mn    | Fe    | Co    | Ni    | Cu    | Zn    |
|------------------------------|--------|--------|-------|-------|-------|-------|-------|-------|-------|-------|-------|
| $E_b(\text{kJ/mol})$         | 105.34 | 111.41 | 94.73 | 87.79 | 90.87 | 97.84 | 84.69 | 84.05 | 81.78 | 68.36 | 83.61 |
| $d_{\text{O-M}}(\text{\AA})$ | 2.018  | 2.120  | 2.154 | 2.143 | 2.255 | 2.080 | 2.120 | 2.058 | 2.053 | 2.166 | 1.990 |

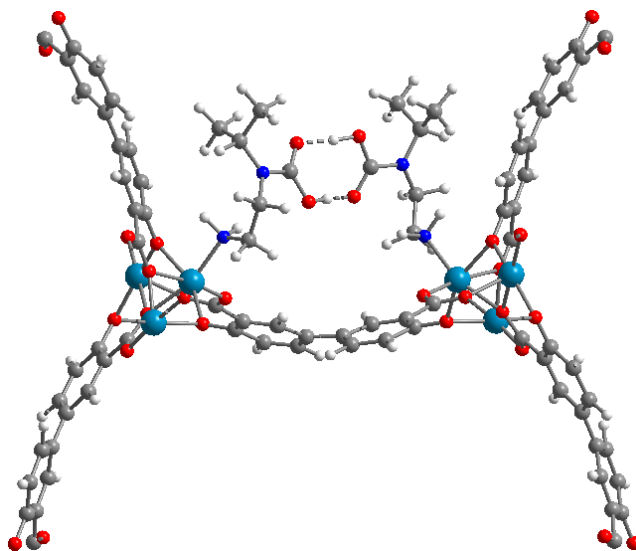

**Fig. S2.** The “pairs structure” proposed by Planas et al. of CO<sub>2</sub> adsorption on i-2-Zn<sub>2</sub>(dobpdc).

**Table S6.** The CO<sub>2</sub> binding energies ( $E_b$ : kJ/mol) of pair model and the difference of  $E_b$  for pair model and the experimental chain model.

|            | Mg    | Sc    | Ti    | V     | Cr    | Mn    | Fe    | Co    | Ni    | Cu    | Zn    |
|------------|-------|-------|-------|-------|-------|-------|-------|-------|-------|-------|-------|
| pair model | 42.23 | 46.85 | 43.85 | 41.88 | 39.53 | 48.77 | 38.72 | 39.63 | 37.48 | 35.24 | 19.47 |
| difference | 23.02 | 21.76 | 8.18  | 10.62 | 16.00 | 10.35 | 12.33 | 7.65  | 7.20  | 8.10  | 23.65 |

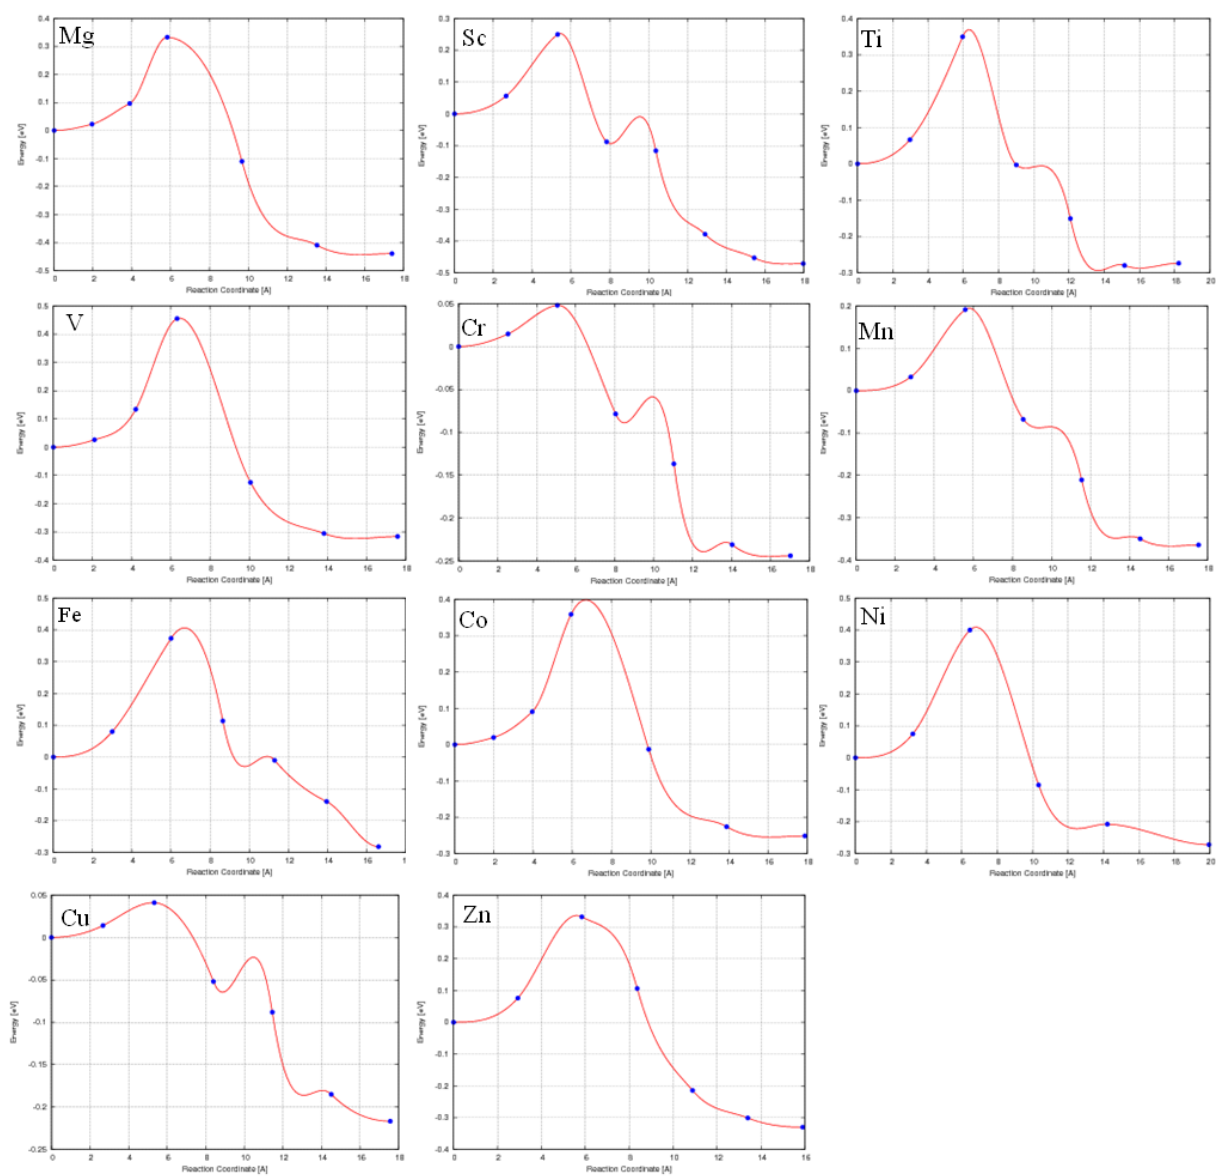

**Fig. S3.** The energy profiles of different images during the climbing image nudged elastic band (CI-NEB) calculations.

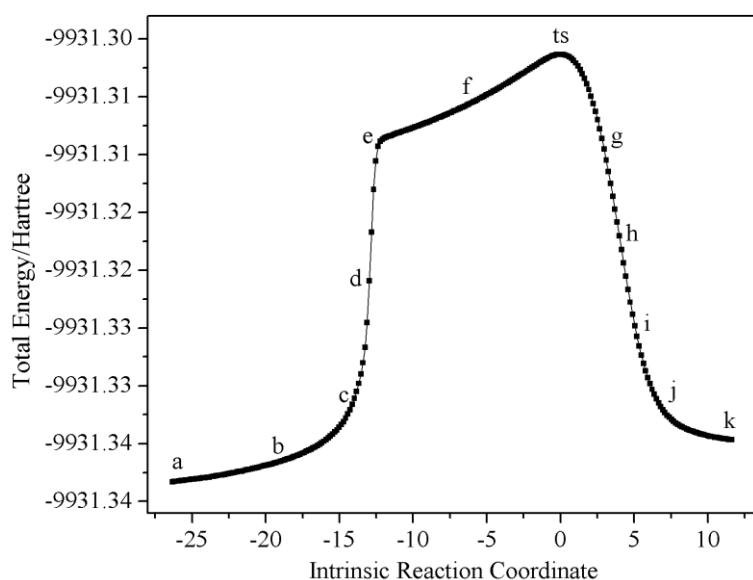

**Fig. S4.** The detailed Intrinsic Reaction Coordinate (IRC) curves of the transition state (TS<sub>1</sub>) of CO<sub>2</sub> adsorption in *i*-2-Zn<sub>2</sub>(dobpdc).

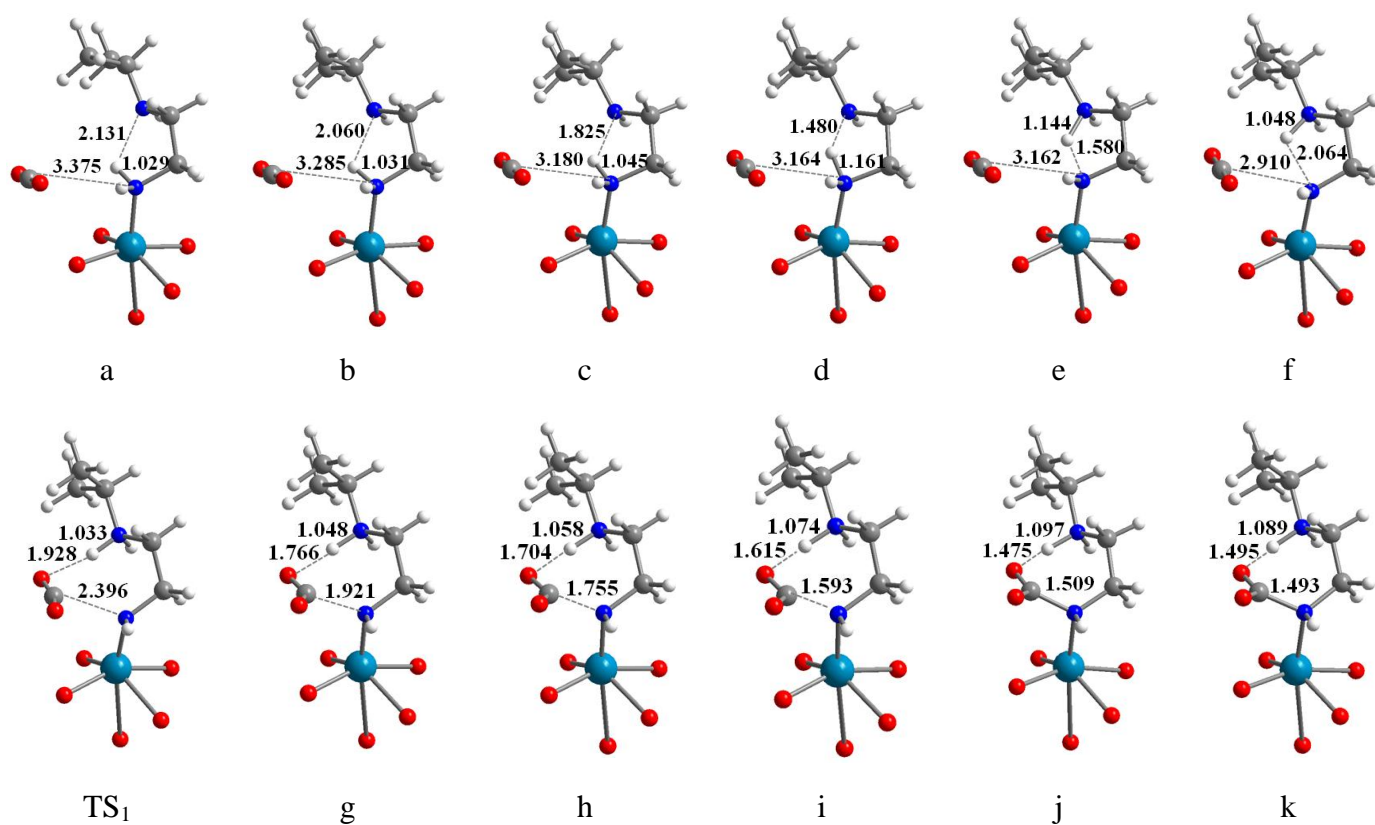

**Fig. S5.** The illustrative structures of selected points along the IRC of the transition state (TS<sub>1</sub>) of CO<sub>2</sub> adsorption in *i*-2-Zn<sub>2</sub>(dobpdc). Cyan blue, red, blue, gray, and white spheres represent Zn, O, N, C, and H atoms, respectively. The bond lengths are in Å.

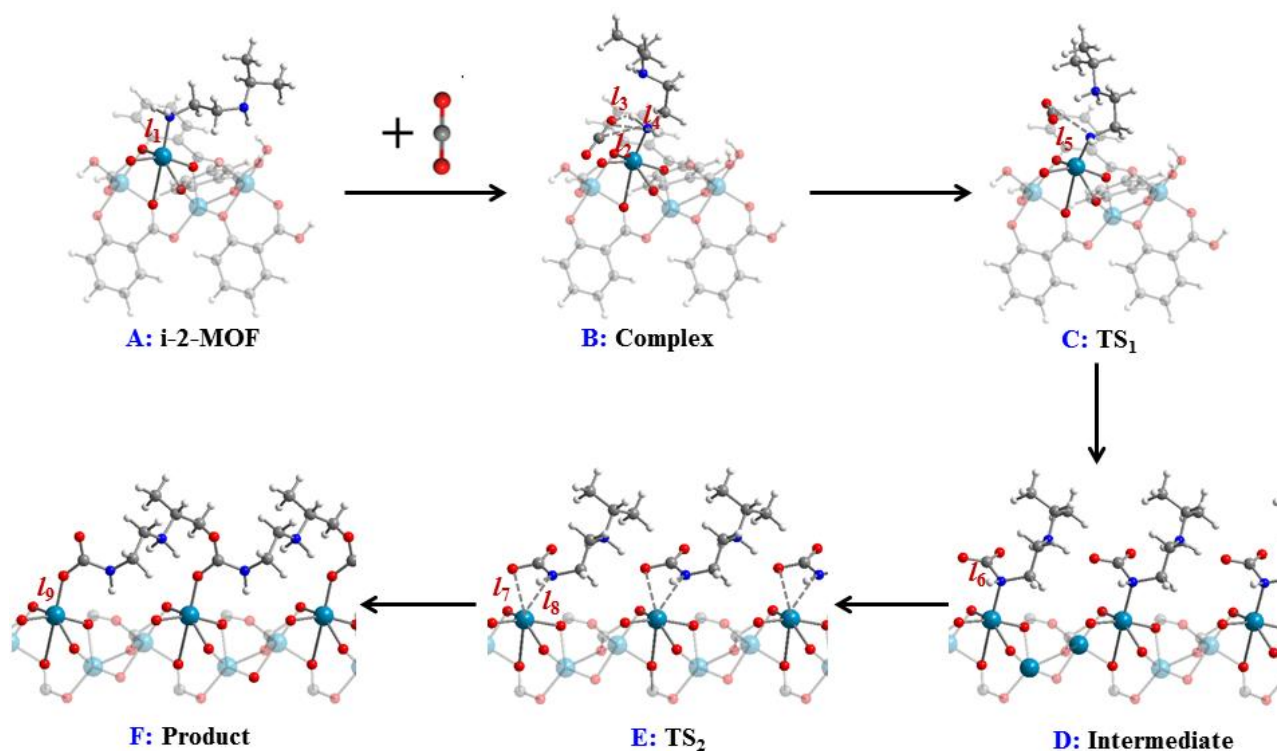

**Fig. S6.** The key distances ( $l_i$  in Å) between two atoms of important intermediates of CO<sub>2</sub> adsorption in  $i-2-M_2(\text{dobpdc})$  ( $M=\text{Mg, Sc-Zn}$ ) are given in the bottom table with the above corresponding structures of important intermediates in reaction process.

|    | $l_1(\text{N-M})$ | $l_2(\text{C-N})$ | $l_3(\text{H-O})$ | $l_4(\text{H-O})$ | $l_5(\text{C-N})$ | $l_6(\text{C-N})$ | $l_7(\text{O-M})$ | $l_8(\text{N-M})$ | $l_9(\text{O-M})$ |
|----|-------------------|-------------------|-------------------|-------------------|-------------------|-------------------|-------------------|-------------------|-------------------|
| Mg | 2.218             | 4.021             | 2.441             | 3.246             | 2.505             | 1.473             | 2.760             | 2.910             | 2.033             |
| Sc | 2.332             | 3.743             | 3.255             | 2.404             | 2.256             | 1.480             | 2.919             | 2.687             | 2.144             |
| Ti | 2.272             | 4.137             | 2.631             | 3.167             | 2.431             | 1.475             | 3.047             | 2.703             | 2.163             |
| V  | 2.208             | 3.857             | 2.810             | 3.122             | 2.390             | 1.481             | 2.813             | 2.938             | 2.153             |
| Cr | 2.179             | 3.976             | 2.576             | 2.945             | 2.368             | 1.434             | 3.195             | 3.055             | 2.312             |
| Mn | 2.090             | 3.984             | 2.523             | 3.105             | 2.565             | 1.473             | 2.787             | 2.564             | 2.116             |
| Fe | 2.010             | 4.289             | 2.836             | 3.303             | 2.549             | 1.469             | 2.957             | 2.986             | 2.113             |
| Co | 1.951             | 4.186             | 2.739             | 3.152             | 2.398             | 1.469             | 2.984             | 2.864             | 2.048             |
| Ni | 1.903             | 3.894             | 2.934             | 2.579             | 2.408             | 1.476             | 3.102             | 3.057             | 2.038             |
| Cu | 2.253             | 3.870             | 2.500             | 2.991             | 2.420             | 1.417             | 3.345             | 3.209             | 2.236             |
| Zn | 2.090             | 3.885             | 2.525             | 2.913             | 2.396             | 1.483             | 2.557             | 2.878             | 2.011             |

The optimized geometry structures and corresponding lattices and coordinates (in VASP format) are listed below:

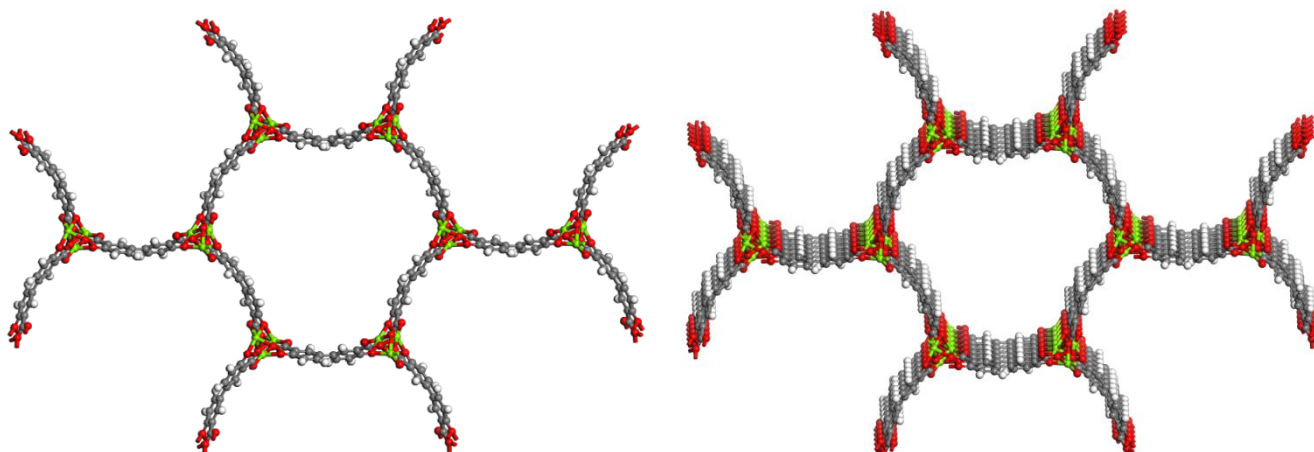

front view

oblique view

Mg<sub>2</sub>(dobpdc)

1.00000000000000

21.5622144298226672 -0.0061177974149995 0.0002390088389067

-10.7864053828879243 18.6703665593549673 -0.0002390088389067

0.0000746199744972 -0.0000430818623629 6.8649102810386049

Mg O C H

6 18 42 18

Direct

0.3426646126153869 0.7194382136860540 0.8089485727263934

0.2804895678449739 0.6230311640816524 0.1422979362980428

0.3768964627581539 0.6573213751748810 0.4756357055045441

0.7194382136860540 0.3426646126153869 0.1910513972736112

0.6230311640816524 0.2804895678449739 0.8577020487019595

0.6573213751748810 0.3768964627581539 0.5243642944954559

0.4218623937637105 0.7551230959419826 0.6071396841451318

0.3665444817686279 0.7132218720965469 0.2471804240854567

0.3927403577100677 0.7951659475161748 0.0157945838355218

0.2448708063028491 0.6665728260722190 0.9404582618148112

0.2867284085854038 0.6531595698204029 0.5804828686849461

0.2047587789502927 0.5973380601507117 0.3491610096149671

0.3333485713838655 0.5781241602045668 0.2738137545570538

0.3467408247580295 0.6333921014054624 0.9138072000506341

0.4025833487291024 0.6073137461464171 0.6825158389778565

0.7551230959419826 0.4218623937637105 0.3928603158548682

0.7132218720965469 0.3665444817686279 0.7528195759145433

0.7951659475161748 0.3927403577100677 0.9842053931644799

0.6665728260722190 0.2448708063028491 0.0595417231851911

0.6531595698204029 0.2867284085854038 0.4195171613150563

0.5973380601507117 0.2047587789502927 0.6508389903850329

0.5781241602045668 0.3333485713838655 0.7261862754429487

0.6333921014054624 0.3467408247580295 0.0861928139493671



|                    |                    |                    |
|--------------------|--------------------|--------------------|
| 0.6073137461464171 | 0.4025833487291024 | 0.3174841610221435 |
| 0.4581704731571534 | 0.8204997672477816 | 0.5254800689541952 |
| 0.4499403865256610 | 0.8349902657117454 | 0.3263511950376810 |
| 0.4880358806958114 | 0.9056599173979123 | 0.2560111184370442 |
| 0.5353946905692624 | 0.9630229160342694 | 0.3718250906931289 |
| 0.5447671937051339 | 0.9477111803109750 | 0.5658950951178454 |
| 0.5074379874098582 | 0.8788390665655399 | 0.6406281304291923 |
| 0.4008174417353345 | 0.7791714553282176 | 0.1888377508619925 |
| 0.1795045924638572 | 0.6375443173146778 | 0.8587969322618321 |
| 0.1649908262129429 | 0.6148135004892907 | 0.6596622581324993 |
| 0.0943316002425263 | 0.5822940406772688 | 0.5892903344114515 |
| 0.0370069374376669 | 0.5723589713842117 | 0.7050807977077227 |
| 0.0523465429673635 | 0.5970494636970329 | 0.8991579989917184 |
| 0.1212060260157841 | 0.6285343213367867 | 0.9739283989424905 |
| 0.2207769533794348 | 0.6214612854933392 | 0.5221709916473358 |
| 0.3624145279974087 | 0.5418442330219904 | 0.1921600618031860 |
| 0.3851481941533947 | 0.5500856252190545 | 0.9930306579961865 |
| 0.4177099118267620 | 0.5120134108872634 | 0.9226774638307376 |
| 0.4276847580087590 | 0.4646596656421025 | 0.0384647984752391 |
| 0.4029940827151677 | 0.4552847174725940 | 0.2325445480898622 |
| 0.3714711103039363 | 0.4925965764093618 | 0.3073031538492828 |
| 0.3784622931386252 | 0.5991875202140022 | 0.8555235395591083 |
| 0.8204997672477816 | 0.4581704731571534 | 0.4745199610458073 |
| 0.8349902657117454 | 0.4499403865256610 | 0.6736488349623144 |
| 0.9056599173979123 | 0.4880358806958114 | 0.7439889115629654 |
| 0.9630229160342694 | 0.5353946905692624 | 0.6281749393068736 |
| 0.9477111803109750 | 0.5447671937051339 | 0.4341048748821521 |
| 0.8788390665655399 | 0.5074379874098582 | 0.3593718405708017 |
| 0.7791714553282176 | 0.4008174417353345 | 0.8111622491380075 |
| 0.6375443173146778 | 0.1795045924638572 | 0.1412030677381679 |
| 0.6148135004892907 | 0.1649908262129429 | 0.3403377418674935 |
| 0.5822940406772688 | 0.0943316002425263 | 0.4107096655885485 |
| 0.5723589713842117 | 0.0370069374376669 | 0.2949192322922727 |
| 0.5970494636970329 | 0.0523465429673635 | 0.1008420080082857 |
| 0.6285343213367867 | 0.1212060260157841 | 0.0260716170575108 |
| 0.6214612854933392 | 0.2207769533794348 | 0.4778290383526738 |
| 0.5418442330219904 | 0.3624145279974087 | 0.8078399521968151 |
| 0.5500856252190545 | 0.3851481941533947 | 0.0069693440038137 |
| 0.5120134108872634 | 0.4177099118267620 | 0.0773225361692695 |
| 0.4646596656421025 | 0.4276847580087590 | 0.9615351935247602 |
| 0.4552847174725940 | 0.4029940827151677 | 0.7674554519101378 |
| 0.4925965764093618 | 0.3714711103039363 | 0.6926968461507172 |
| 0.5991875202140022 | 0.3784622931386252 | 0.1444764754408894 |
| 0.4777047807851318 | 0.9145055154022970 | 0.1059636606015530 |
| 0.5830390899059239 | 0.9911545911180681 | 0.6589079888543239 |
| 0.5152789907422459 | 0.8677938350568866 | 0.7909983005016983 |

|                    |                    |                    |
|--------------------|--------------------|--------------------|
| 0.0854583018849837 | 0.5631073214361919 | 0.4392407752983800 |
| 0.0089347362893974 | 0.5919325759429270 | 0.9921375500805283 |
| 0.1322739888745090 | 0.6474288135686166 | 0.1243007267171237 |
| 0.4368924267935412 | 0.5223521636653174 | 0.7726264284782545 |
| 0.4081364063824182 | 0.4170160338872577 | 0.3255430986717087 |
| 0.3525784195522590 | 0.4847465437272120 | 0.4576790586957600 |
| 0.9145055154022970 | 0.4777047807851318 | 0.8940363243984351 |
| 0.9911545911180681 | 0.5830390899059239 | 0.3410920111456761 |
| 0.8677938350568866 | 0.5152789907422459 | 0.2090016994983017 |
| 0.5631073214361919 | 0.0854583018849837 | 0.5607592247016200 |
| 0.5919325759429270 | 0.0089347362893974 | 0.0078624289194735 |
| 0.6474288135686166 | 0.1322739888745090 | 0.8756993032828788 |
| 0.5223521636653174 | 0.4368924267935412 | 0.2273735415217430 |
| 0.4170160338872577 | 0.4081364063824182 | 0.6744568723282924 |
| 0.4847465437272120 | 0.3525784195522590 | 0.5423209113042375 |

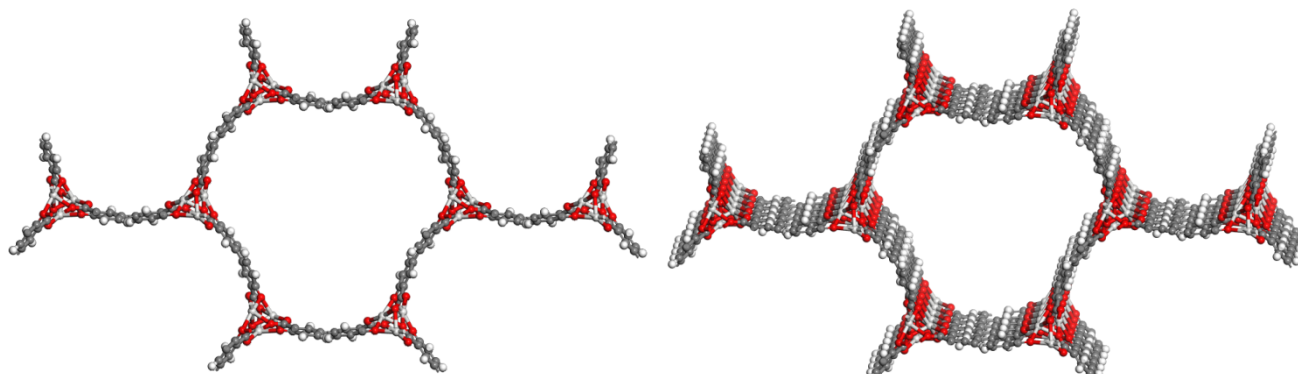

front view

oblique view

Sc<sub>2</sub>(dobpdc)

|                      |                     |                     |    |
|----------------------|---------------------|---------------------|----|
| 1.0000000000000000   |                     |                     |    |
| 22.0077977694126616  | -0.0171179567425246 | 0.0014974342794874  |    |
| -11.0187234660599742 | 19.0507545010284112 | -0.0014986146273214 |    |
| 0.0004854656213895   | -0.0002806785821669 | 7.3483484605761689  |    |
| Sc                   | O                   | C                   | H  |
| 6                    | 18                  | 42                  | 18 |

Direct

|                    |                    |                    |
|--------------------|--------------------|--------------------|
| 0.3461715885489625 | 0.7238738778909166 | 0.8178592658588215 |
| 0.2759642632988104 | 0.6217382482239131 | 0.1512493780703963 |
| 0.3781158151432749 | 0.6538383564737700 | 0.4846123255426917 |
| 0.7238739626940216 | 0.3461716066085430 | 0.1821408397440578 |
| 0.6217382315023983 | 0.2759642490361216 | 0.8487506186033684 |
| 0.6538383475639975 | 0.3781158247362200 | 0.5153875261163634 |
| 0.4275349225875189 | 0.7619946073820074 | 0.6011114082964895 |
| 0.3778700103226456 | 0.7162184848726696 | 0.2528808828910982 |
| 0.4047709340723600 | 0.7976659131046162 | 0.0378127763108722 |
| 0.2380509351726232 | 0.6650691960099806 | 0.9344310865483436 |
| 0.2836976459016896 | 0.6611723507168179 | 0.5860744068911998 |
| 0.2021699311660754 | 0.6066252292467809 | 0.3710589904248351 |

|                    |                    |                    |
|--------------------|--------------------|--------------------|
| 0.3346979172842097 | 0.5724637542037385 | 0.2677562016510322 |
| 0.3385966720380864 | 0.6220063714086876 | 0.9193947477608546 |
| 0.3933018584433299 | 0.5952974610078101 | 0.7045175351473247 |
| 0.7619946736586911 | 0.4275349752134474 | 0.3988887423339520 |
| 0.7162185644959109 | 0.3778698071988131 | 0.7471187497879654 |
| 0.7976659201308678 | 0.4047708469100613 | 0.9621872311076700 |
| 0.6650690841562295 | 0.2380508386383227 | 0.0655688580298772 |
| 0.6611724043542395 | 0.2836976022069209 | 0.4139253931592677 |
| 0.6066253177393364 | 0.2021699781528525 | 0.6289408814323778 |
| 0.5724638586567607 | 0.3346980864809623 | 0.7322436744296041 |
| 0.6220066110770901 | 0.3385970218421122 | 0.0806050674002492 |
| 0.5952974489183731 | 0.3933019313193000 | 0.2954823827281032 |
| 0.4623526301752392 | 0.8253375211812823 | 0.5209498450260384 |
| 0.4565534218097724 | 0.8370775078551489 | 0.3309615060821400 |
| 0.4939375568985014 | 0.9064991601500481 | 0.2635297098810270 |
| 0.5373005777274500 | 0.9641167065338081 | 0.3713793407890051 |
| 0.5436628220806270 | 0.9511591836730133 | 0.5572270480248420 |
| 0.5070553873143808 | 0.8840743581885633 | 0.6292485018806957 |
| 0.4117052961510339 | 0.7821751177800778 | 0.2017172173223685 |
| 0.1747330647988719 | 0.6366884111032789 | 0.8542706017800370 |
| 0.1629326824411592 | 0.6191723171079815 | 0.6642412932490132 |
| 0.0935275622435299 | 0.5872837171139267 | 0.5968185493339178 |
| 0.0359977740646116 | 0.5731673958108701 | 0.7046960092282646 |
| 0.0490269507986838 | 0.5924740186989155 | 0.8905687287274588 |
| 0.1160900117629282 | 0.6228002459952009 | 0.9625891512766387 |
| 0.2177396372255558 | 0.6291002180139955 | 0.5349514574337348 |
| 0.3631710902554701 | 0.5376750499896517 | 0.1876240021546991 |
| 0.3807308686590289 | 0.5434665227386191 | 0.9976207742136367 |
| 0.4127034773291243 | 0.5061078406160107 | 0.9301969581962268 |
| 0.4268718965440215 | 0.4627692902116252 | 0.0380449884101495 |
| 0.4075467466827831 | 0.4564294750306033 | 0.2239134319373619 |
| 0.3771378933672054 | 0.4930160668824115 | 0.2959323863948811 |
| 0.3707610125673568 | 0.5882855400063320 | 0.8683521576693423 |
| 0.8253375779462289 | 0.4623526834905860 | 0.4790503701027689 |
| 0.8370775586734354 | 0.4565534927384363 | 0.6690387066545327 |
| 0.9064992052993972 | 0.4939377192962553 | 0.7364705637937377 |
| 0.9641167053976361 | 0.5373006100694155 | 0.6286210799017553 |
| 0.9511592432867673 | 0.5436628371866874 | 0.4427731626913811 |
| 0.8840743784598359 | 0.5070553849377788 | 0.3707517648706045 |
| 0.7821750918117942 | 0.4117051893821184 | 0.7982827320998709 |
| 0.6366883360431217 | 0.1747330207516526 | 0.1457293360454770 |
| 0.6191723425934725 | 0.1629326767417254 | 0.3357586066247080 |
| 0.5872837559167579 | 0.0935275626653862 | 0.4031816143718601 |
| 0.5731673583045378 | 0.0359977044232735 | 0.2953040773967714 |
| 0.5924739648925907 | 0.0490268872818476 | 0.1094315340378600 |
| 0.6228002102118140 | 0.1160900359575692 | 0.0374108096200203 |

|                    |                    |                    |
|--------------------|--------------------|--------------------|
| 0.6291002691497738 | 0.2177396470092035 | 0.4650483548416773 |
| 0.5376751168738281 | 0.3631711679628040 | 0.8123758971164534 |
| 0.5434665199003348 | 0.3807308790347150 | 0.0023792177879756 |
| 0.5061076805093165 | 0.4127033511960150 | 0.0698028622590456 |
| 0.4627692191999984 | 0.4268719227397781 | 0.9619548605530639 |
| 0.4564295143684376 | 0.4075468143111678 | 0.7760862533603259 |
| 0.4930161520359277 | 0.3771379915460358 | 0.7040673562543489 |
| 0.5882856352449650 | 0.3707611279407601 | 0.1316475520394462 |
| 0.4858988044695209 | 0.9137128550754809 | 0.1205837526828830 |
| 0.5787260306751421 | 0.9946363839062471 | 0.6455482619511912 |
| 0.5124219694354650 | 0.8747093347488573 | 0.7728424392336279 |
| 0.0862443520669558 | 0.5720302408699993 | 0.4538535662408307 |
| 0.0056326108312064 | 0.5841719588013561 | 0.9789197047465663 |
| 0.1255128120971492 | 0.6375218058284560 | 0.1062089259909413 |
| 0.4279669765261715 | 0.5141397972476796 | 0.7872326825640243 |
| 0.4158939998396249 | 0.4213947507732954 | 0.3122605049627651 |
| 0.3624062954696541 | 0.4876576221329216 | 0.4395537346967657 |
| 0.9137128544303081 | 0.4858991275773690 | 0.8794167108482753 |
| 0.9946364361940923 | 0.5787259959123574 | 0.3544520498784181 |
| 0.8747094168657057 | 0.5124219231948928 | 0.2271577698211047 |
| 0.5720303611463393 | 0.0862443515464335 | 0.5461464843293058 |
| 0.5841719973072443 | 0.0056325667227171 | 0.0210806129897492 |
| 0.6375217311796462 | 0.1255127028768044 | 0.8937911996988035 |
| 0.5141395447910782 | 0.4279668292864542 | 0.2127672562894816 |
| 0.4213948399194791 | 0.4158941337283366 | 0.6877392222110288 |
| 0.4876577618104179 | 0.3624065405403769 | 0.5604458421622311 |

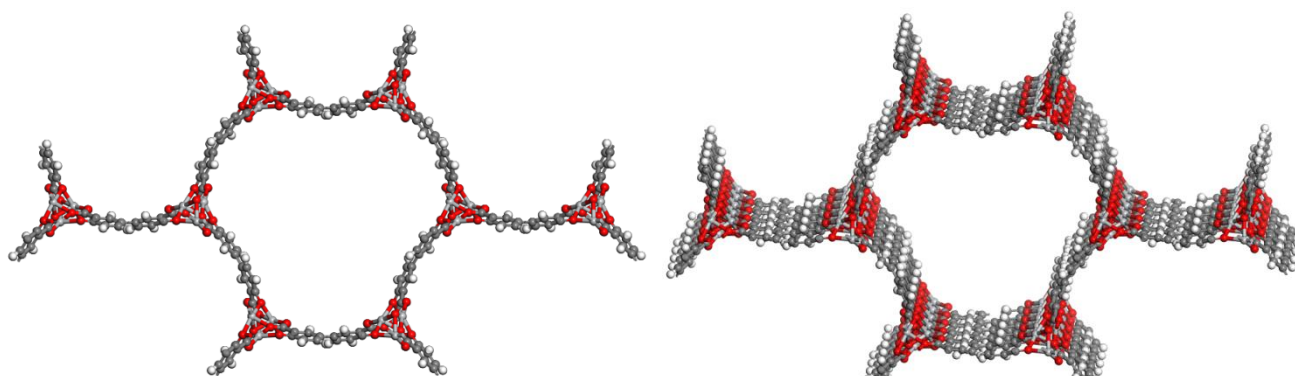

front view

oblique view

Ti<sub>2</sub>(dobpdc)

1.0000000000000000

21.7376469755607538 -0.0167321867752584 0.0001249247397954

-10.8833139865886288 18.8169884059343886 -0.0001249247397954

0.0000432520230313 -0.0000249715671401 7.1064139015221297

Ti O C H

6 18 42 18

Direct

0.3453517646134756 0.7234527709261229 0.8152000067013319

|                    |                    |                    |
|--------------------|--------------------|--------------------|
| 0.2764053864952913 | 0.6213355720875597 | 0.1485776185673657 |
| 0.3785194898788689 | 0.6546534946234175 | 0.4819533415822619 |
| 0.7234527709261229 | 0.3453517646134756 | 0.1847999632986728 |
| 0.6213355720875597 | 0.2764053864952913 | 0.8514223664326366 |
| 0.6546534946234175 | 0.3785194898788689 | 0.5180466584177381 |
| 0.4253511482156469 | 0.7588710668375143 | 0.6071991915001504 |
| 0.3702664421205100 | 0.7142512584071881 | 0.2560391030325988 |
| 0.3959915462673109 | 0.7959482696368667 | 0.0325041644875839 |
| 0.2411629454724959 | 0.6659608521837725 | 0.9404222650038605 |
| 0.2856431157641666 | 0.6554606223506383 | 0.5892880140884884 |
| 0.2038959078302867 | 0.5995182657818461 | 0.3656880111835150 |
| 0.3337868924371747 | 0.5746349608585462 | 0.2739206478840899 |
| 0.3443554318956643 | 0.6297018858460461 | 0.9227441263102136 |
| 0.4003389941075781 | 0.6040758400641337 | 0.6992361818030588 |
| 0.7588710668375143 | 0.4253511482156469 | 0.3928008084998496 |
| 0.7142512584071881 | 0.3702664421205100 | 0.7439608969674012 |
| 0.7959482696368667 | 0.3959915462673109 | 0.9674958125124178 |
| 0.6659608521837725 | 0.2411629454724959 | 0.0595777199961418 |
| 0.6554606223506383 | 0.2856431157641666 | 0.4107120159115141 |
| 0.5995182657818461 | 0.2038959078302867 | 0.6343119888164850 |
| 0.5746349608585462 | 0.3337868924371747 | 0.7260793821159126 |
| 0.6297018858460461 | 0.3443554318956643 | 0.0772558876897875 |
| 0.6040758400641337 | 0.4003389941075781 | 0.3007638181969412 |
| 0.4611376417243065 | 0.8234563442638105 | 0.5250824002067702 |
| 0.4530813060674461 | 0.8358427520058882 | 0.3309901093568399 |
| 0.4912844274227481 | 0.9059123491055701 | 0.2611123804461712 |
| 0.5373055093432200 | 0.9635988838134324 | 0.3722160078952967 |
| 0.5455942760656569 | 0.9499744375675050 | 0.5622167981793353 |
| 0.5084995755004158 | 0.8819100238640019 | 0.6363264961338828 |
| 0.4047594647148998 | 0.7802495628280539 | 0.2011180467488529 |
| 0.1766089049312569 | 0.6373011272865128 | 0.8582903280847560 |
| 0.1641535479913401 | 0.6168472849114579 | 0.6641848021848205 |
| 0.0941081850933116 | 0.5851423104533993 | 0.5942780144425228 |
| 0.0365311789173077 | 0.5736803722390391 | 0.7053491481064142 |
| 0.0502362370905658 | 0.5956113145491670 | 0.8953526880370930 |
| 0.1182687039417232 | 0.6263993002877370 | 0.9695088121983275 |
| 0.2196534421022704 | 0.6240033525562225 | 0.5343244213401590 |
| 0.3625444637735882 | 0.5388964337997280 | 0.1918103571061707 |
| 0.3830183183605271 | 0.5469728851536502 | 0.9977132392712207 |
| 0.4147995487760028 | 0.5087916823094574 | 0.9278000918345555 |
| 0.4263479159353523 | 0.4627598062932776 | 0.0388360855842791 |
| 0.4044309400633423 | 0.4544710724553838 | 0.2288639511952582 |
| 0.3735512580443228 | 0.4915517704036247 | 0.3030185711289306 |
| 0.3758329867366612 | 0.5952717265534986 | 0.8678423415834473 |
| 0.8234563442638105 | 0.4611376417243065 | 0.4749176297932323 |
| 0.8358427520058882 | 0.4530813060674461 | 0.6690099206431555 |

|                    |                    |                    |
|--------------------|--------------------|--------------------|
| 0.9059123491055701 | 0.4912844274227481 | 0.7388876495538383 |
| 0.9635988838134324 | 0.5373055093432200 | 0.6277840221047057 |
| 0.9499744375675050 | 0.5455942760656569 | 0.4377831718206622 |
| 0.8819100238640019 | 0.5084995755004158 | 0.3636734748661112 |
| 0.7802495628280539 | 0.4047594647148998 | 0.7988819532511471 |
| 0.6373011272865128 | 0.1766089049312569 | 0.1417096719152440 |
| 0.6168472849114579 | 0.1641535479913401 | 0.3358151978151724 |
| 0.5851423104533993 | 0.0941081850933116 | 0.4057219855574772 |
| 0.5736803722390391 | 0.0365311789173077 | 0.2946508818935811 |
| 0.5956113145491670 | 0.0502362370905658 | 0.1046473189629111 |
| 0.6263993002877370 | 0.1182687039417232 | 0.0304912038016738 |
| 0.6240033525562225 | 0.2196534421022704 | 0.4656756086598506 |
| 0.5388964337997280 | 0.3625444637735882 | 0.8081896568938305 |
| 0.5469728851536502 | 0.3830183183605271 | 0.0022867627287795 |
| 0.5087916823094574 | 0.4147995487760028 | 0.0721999081654445 |
| 0.4627598062932776 | 0.4263479159353523 | 0.9611639064157202 |
| 0.4544710724553838 | 0.4044309400633423 | 0.7711360488047418 |
| 0.4915517704036247 | 0.3735512580443228 | 0.6969814288710694 |
| 0.5952717265534986 | 0.3758329867366612 | 0.1321576734165575 |
| 0.4816617782082204 | 0.9140119835990390 | 0.1150716398545484 |
| 0.5825054124049203 | 0.9937144262352504 | 0.6521905136494226 |
| 0.5152242664601658 | 0.8717432123597817 | 0.7832363695879465 |
| 0.0859221258194012 | 0.5673909036432931 | 0.4482342002082831 |
| 0.0065895044163184 | 0.5889465834043577 | 0.9852755479204163 |
| 0.1285088049789138 | 0.6433135659450500 | 0.1164233282168468 |
| 0.4325386507192945 | 0.5184241872101154 | 0.7817453355378703 |
| 0.4111707972076957 | 0.4175590313180990 | 0.3188082693362233 |
| 0.3566411769958009 | 0.4848069500755088 | 0.4499375561389201 |
| 0.9140119835990390 | 0.4816617782082204 | 0.8849283451454468 |
| 0.9937144262352504 | 0.5825054124049203 | 0.3478094863505774 |
| 0.8717432123597817 | 0.5152242664601658 | 0.2167636304120535 |
| 0.5673909036432931 | 0.0859221258194012 | 0.5517657997917098 |
| 0.5889465834043577 | 0.0065895044163184 | 0.0147244310795855 |
| 0.6433135659450500 | 0.1285088049789138 | 0.8835767017831557 |
| 0.5184241872101154 | 0.4325386507192945 | 0.2182546344621272 |
| 0.4175590313180990 | 0.4111707972076957 | 0.6811917016637707 |
| 0.4848069500755088 | 0.3566411769958009 | 0.5500624138610846 |

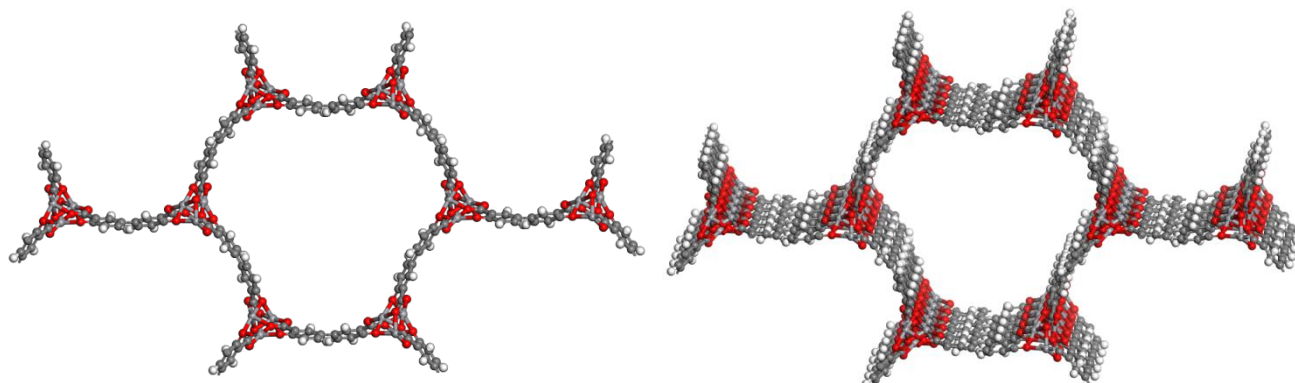

front view

oblique view

$V_2(\text{dobpdc})$

1.00000000000000

21.6672025682976219 -0.0138266569703958 0.0015689876395125

-10.8455755069116613 18.7574394963946744 -0.0015662526982107

0.0005058216702971 -0.0002909861288431 7.0581730229338246

V O C H

6 18 42 18

Direct

0.3423998239130484 0.7222098590592552 0.8121057830144167

0.2776699501742570 0.6197496674511171 0.1453797204532492

0.3801226411230658 0.6575965005597197 0.4787451589243688

0.7222097396040397 0.3423997966002901 0.1878941698121537

0.6197495611348813 0.2776697382296334 0.8546202025685048

0.6575964263847567 0.3801225599516158 0.5212549789936460

0.4283921138741960 0.7581387962596224 0.6118976531597795

0.3701769596407232 0.7130238660249404 0.2488437617536974

0.3972589053309221 0.7967600048081565 0.0295986890447963

0.2418614027208363 0.6698315048426480 0.9452231021552038

0.2868998869178654 0.6567241226445546 0.5822187266679180

0.2031540087333426 0.6000642713294297 0.3628809615653026

0.3299603930634234 0.5716155756193118 0.2784352654626545

0.3430789499596116 0.6297478740416409 0.9153967028205443

0.3998128055772128 0.6028087960681532 0.6961949532059748

0.7581387629569534 0.4283920444310994 0.3881024503531165

0.7130239074469102 0.3701768237242504 0.7511565525540576

0.7967600090868032 0.3972590239753515 0.9704014729458592

0.6698317399790952 0.2418614966357211 0.0547769142951324

0.6567241490342326 0.2868999026700365 0.4177815234862479

0.6000642506360947 0.2031539551468029 0.6371192171384692

0.5716154743407245 0.3299601779223238 0.7215647402953351

0.6297476004246292 0.3430785497571662 0.0846030295218227

0.6028091556191484 0.3998129921680302 0.3038044432890459

0.4617039168474903 0.8223106908201245 0.5273683769708200

0.4532704929844513 0.8348912192528459 0.3319817101442268

0.4904746838139289 0.9051607946203220 0.2618889692998962

|                    |                    |                    |
|--------------------|--------------------|--------------------|
| 0.5361648846725657 | 0.9635559905722175 | 0.3730003124670773 |
| 0.5445675487289279 | 0.9500907127625879 | 0.5642420633675087 |
| 0.5085068189460102 | 0.8818688411050104 | 0.6387989522397461 |
| 0.4048106752376626 | 0.7794979691616888 | 0.1965530565206706 |
| 0.1777176324161047 | 0.6391068177035919 | 0.8605912995457388 |
| 0.1651103535735956 | 0.6181068616638115 | 0.6651581872329189 |
| 0.0948690097280860 | 0.5851798513912030 | 0.5949382723714507 |
| 0.0365357935359683 | 0.5726005425654819 | 0.7059873947229818 |
| 0.0500383538183229 | 0.5944684110674032 | 0.8972606378636669 |
| 0.1182292122773418 | 0.6264957536473332 | 0.9719371050473384 |
| 0.2204428285845381 | 0.6249241154695540 | 0.5298322278183463 |
| 0.3607762928248519 | 0.5383245096928988 | 0.1939064216306150 |
| 0.3818034880919257 | 0.5467552731971210 | 0.9985024136435143 |
| 0.4148148902286266 | 0.5095745647373278 | 0.9283820260244298 |
| 0.4274520352428723 | 0.4639089852857410 | 0.0394878269442742 |
| 0.4055738150240487 | 0.4555206265628158 | 0.2307508677862131 |
| 0.3734686644374250 | 0.4915598242106114 | 0.3053426409394930 |
| 0.3749341007256461 | 0.5951940257505584 | 0.8631230621870856 |
| 0.8223105553122494 | 0.4617038873084525 | 0.4726314690279168 |
| 0.8348911921760731 | 0.4532705841279849 | 0.6680182301013389 |
| 0.9051607986979633 | 0.4904748056950794 | 0.7381112156740599 |
| 0.9635558800742743 | 0.5361650175498056 | 0.6269995831247570 |
| 0.9500907719883074 | 0.5445676062742351 | 0.4357578937854711 |
| 0.8818688522231568 | 0.5085067848837426 | 0.3612011203732806 |
| 0.7794978105510424 | 0.4048105804791575 | 0.8034471993575281 |
| 0.6391068561412752 | 0.1777176484716563 | 0.1394088888564795 |
| 0.6181067586055065 | 0.1651103529996547 | 0.3348418072886403 |
| 0.5851796549747519 | 0.0948690351196859 | 0.4050615318036606 |
| 0.5726003464989944 | 0.0365358676791914 | 0.2940124909484325 |
| 0.5944683362433310 | 0.0500384141461083 | 0.1027395794858137 |
| 0.6264957529007376 | 0.1182291894054259 | 0.0280629812744237 |
| 0.6249240945968708 | 0.2204428270149990 | 0.4701678562330187 |
| 0.5383244020901898 | 0.3607761272656660 | 0.8060935631510873 |
| 0.5467552241983498 | 0.3818033643955658 | 0.0014975967301680 |
| 0.5095744905663224 | 0.4148147803665481 | 0.0716180500983796 |
| 0.4639089479920600 | 0.4274519846996867 | 0.9605122706169240 |
| 0.4555205916301333 | 0.4055737712842884 | 0.7692491125464116 |
| 0.4915597199817938 | 0.3734685977194303 | 0.6946572887651641 |
| 0.5951940135094915 | 0.3749339893014536 | 0.1368764013269015 |
| 0.4805479070633893 | 0.9128563357397823 | 0.1147449398898530 |
| 0.5811249552468425 | 0.9942438119741723 | 0.6548896002680777 |
| 0.5155576248874993 | 0.8718843369086571 | 0.7866405853781515 |
| 0.0871364583847978 | 0.5675617861314635 | 0.4477561869445950 |
| 0.0059382502119263 | 0.5869770700221650 | 0.9878391523085384 |
| 0.1282444204975164 | 0.6435342359806455 | 0.1198029948789738 |
| 0.4324441005458155 | 0.5194920341129077 | 0.7812053623499935 |



|                    |                    |                    |
|--------------------|--------------------|--------------------|
| 0.4131123939252461 | 0.4189825745964129 | 0.3213982617587376 |
| 0.3564265341317139 | 0.4845157634508297 | 0.4532053990836715 |
| 0.9128561732991685 | 0.4805478829449115 | 0.8852550704232556 |
| 0.9942438263255582 | 0.5811248237190583 | 0.3451103215289493 |
| 0.8718844240366650 | 0.5155575164950434 | 0.2133589361774000 |
| 0.5675617005909785 | 0.0871364911605852 | 0.5522439610041445 |
| 0.5869771677346591 | 0.0059383020818302 | 0.0121611266180466 |
| 0.6435343980819681 | 0.1282444742026598 | 0.8801969697481553 |
| 0.5194919616843734 | 0.4324439568922571 | 0.2187945479846931 |
| 0.4189826707048709 | 0.4131124654163898 | 0.6786018497540809 |
| 0.4845157832769829 | 0.3564265518213006 | 0.5467946680815317 |

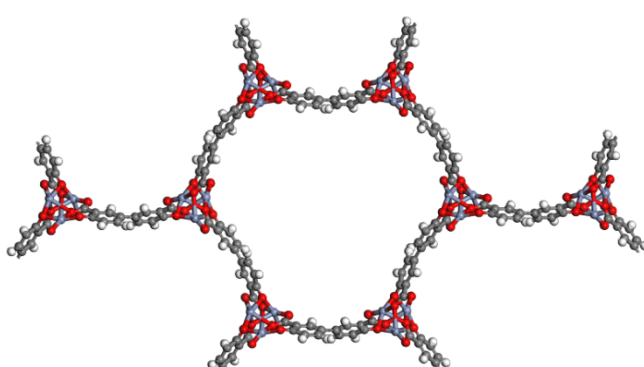

front view

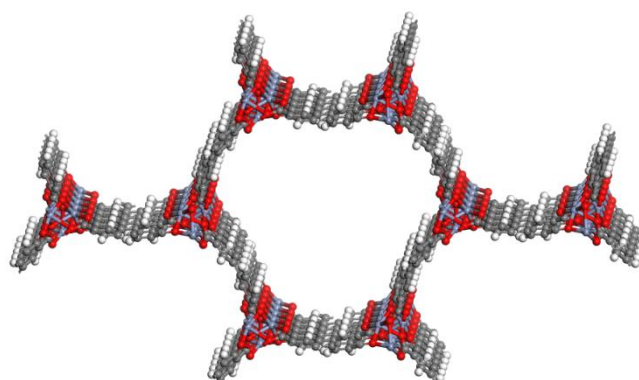

oblique view

Cr<sub>2</sub>(dobpdc)

1.0000000000000000

21.8735954522529887 -0.0140744169686753 0.0002106676107266

-10.9489865287647952 18.9360521252586551 -0.0002106676107266

0.0000886573910456 -0.0000511863685858 6.5332783903501737

Cr O C H

6 18 42 18

Direct

0.3352270910337722 0.7270663859607254 0.7834144506284844

0.2728128490213209 0.6076748120665627 0.1168579409607986

0.3922209625977402 0.6648079490189929 0.4501310672508723

0.7270663859607254 0.3352270910337722 0.2165855193715203

0.6076748120665627 0.2728128490213209 0.8831420440392037

0.6648079490189929 0.3922209625977402 0.5498689327491277

0.4259043025750557 0.7571689040534366 0.6102733419094051

0.3870315338295569 0.7167342665376566 0.1998161152531139

0.3855028967651748 0.8001376523903758 0.0097977426120721

0.2428452037224389 0.6682606885618654 0.9435916762743659

0.2832415074628756 0.6699308337742380 0.5330043251765133

0.1997327992954894 0.5848069269018907 0.3432334067970544

0.3315324322249964 0.5741102043674218 0.2770096018964239

0.3299830512259518 0.6129492474365961 0.8665524362055805

0.4149889279362426 0.6146041563915148 0.6765533560154324

0.7571689040534366 0.4259043025750557 0.3897266580905949

|                    |                    |                    |
|--------------------|--------------------|--------------------|
| 0.7167342665376566 | 0.3870315338295569 | 0.8001838847468861 |
| 0.8001376523903758 | 0.3855028967651748 | 0.9902022343879295 |
| 0.6682606885618654 | 0.2428452037224389 | 0.0564083087256364 |
| 0.6699308337742380 | 0.2832415074628756 | 0.4669957048234892 |
| 0.5848069269018907 | 0.1997327992954894 | 0.6567665932029456 |
| 0.5741102043674218 | 0.3315324322249964 | 0.7229904281035786 |
| 0.6129492474365961 | 0.3299830512259518 | 0.1334475777944206 |
| 0.6146041563915148 | 0.4149889279362426 | 0.3234466439845676 |
| 0.4611508164407780 | 0.8225078392498091 | 0.5259744731357614 |
| 0.4504209426707817 | 0.8372238007480206 | 0.3207180867644581 |
| 0.4855593422797639 | 0.9074546435585589 | 0.2506503160511357 |
| 0.5336008268438519 | 0.9633405887803264 | 0.3725089111050295 |
| 0.5458668561280575 | 0.9474653893985590 | 0.5718150558671908 |
| 0.5106770669208842 | 0.8790284554271821 | 0.6474147261601715 |
| 0.4048331900743705 | 0.7819406031542471 | 0.1719024893098080 |
| 0.1775373766377015 | 0.6383048138134342 | 0.8592075770333167 |
| 0.1627683824554609 | 0.6128738088086791 | 0.6538982597972591 |
| 0.0925571229400788 | 0.5779424615975230 | 0.5836704894591875 |
| 0.0367592426030328 | 0.5702404822466178 | 0.7054646196025942 |
| 0.0527018191730591 | 0.5983643839201918 | 0.9048289822590405 |
| 0.1211131824058782 | 0.6314616656577741 | 0.9805627293716483 |
| 0.2179982127259450 | 0.6224631207445128 | 0.5051781124443693 |
| 0.3615648836664604 | 0.5388883825666326 | 0.1926495856862829 |
| 0.3870155749462398 | 0.5496235050824723 | 0.9873628918804087 |
| 0.4220201328033539 | 0.5144849954713564 | 0.9171925406082977 |
| 0.4297780791077486 | 0.4664462695348917 | 0.0390038871705514 |
| 0.4016421127778003 | 0.4541879630853316 | 0.2383577934683814 |
| 0.3684759840311358 | 0.4893694721971258 | 0.3140398977071328 |
| 0.3773957010979174 | 0.5952120022128256 | 0.8386169542789830 |
| 0.8225078392498091 | 0.4611508164407780 | 0.4740255568642411 |
| 0.8372238007480206 | 0.4504209426707817 | 0.6792819432355373 |
| 0.9074546435585589 | 0.4855593422797639 | 0.7493497139488738 |
| 0.9633405887803264 | 0.5336008268438519 | 0.6274911188949730 |
| 0.9474653893985590 | 0.5458668561280575 | 0.4281849141328138 |
| 0.8790284554271821 | 0.5106770669208842 | 0.3525852448398226 |
| 0.7819406031542471 | 0.4048331900743705 | 0.8280975106901920 |
| 0.6383048138134342 | 0.1775373766377015 | 0.1407924229666833 |
| 0.6128738088086791 | 0.1627683824554609 | 0.3461017402027338 |
| 0.5779424615975230 | 0.0925571229400788 | 0.4163295105408125 |
| 0.5702404822466178 | 0.0367592426030328 | 0.2945354103974012 |
| 0.5983643839201918 | 0.0527018191730591 | 0.0951710247409636 |
| 0.6314616656577741 | 0.1211131824058782 | 0.0194372866283530 |
| 0.6224631207445128 | 0.2179982127259450 | 0.4948219175556403 |
| 0.5388883825666326 | 0.3615648836664604 | 0.8073504283137112 |
| 0.5496235050824723 | 0.3870155749462398 | 0.0126371101195915 |
| 0.5144849954713564 | 0.4220201328033539 | 0.0828074593917023 |

|                    |                    |                    |
|--------------------|--------------------|--------------------|
| 0.4664462695348917 | 0.4297780791077486 | 0.9609961048294480 |
| 0.4541879630853316 | 0.4016421127778003 | 0.7616422065316186 |
| 0.4893694721971258 | 0.3684759840311358 | 0.6859601022928672 |
| 0.5952120022128256 | 0.3773957010979174 | 0.1613830607210218 |
| 0.4735065841902752 | 0.9171247293505829 | 0.0961842142812941 |
| 0.5846789805896790 | 0.9900597811398910 | 0.6679539844961013 |
| 0.5207338894846387 | 0.8672499598366059 | 0.8018199392410423 |
| 0.0828256725341845 | 0.5562433341747450 | 0.4291343813559294 |
| 0.0101800120225164 | 0.5946944202887465 | 0.0008902793009824 |
| 0.1329424490492599 | 0.6533007994467468 | 0.1350015573048253 |
| 0.4437316553185155 | 0.5265201351286706 | 0.7626731844569932 |
| 0.4053579201987034 | 0.4153778637714822 | 0.3344518652607036 |
| 0.3466334836357845 | 0.4793011597007180 | 0.4684695643279326 |
| 0.9171247293505829 | 0.4735065841902752 | 0.9038157707187082 |
| 0.9900597811398910 | 0.5846789805896790 | 0.3320460155038987 |
| 0.8672499598366059 | 0.5207338894846387 | 0.1981800607589506 |
| 0.5562433341747450 | 0.0828256725341845 | 0.5708656186440635 |
| 0.5946944202887465 | 0.0101800120225164 | 0.9991096996990194 |
| 0.6533007994467468 | 0.1329424490492599 | 0.8649984726951772 |
| 0.5265201351286706 | 0.4437316553185155 | 0.2373267855430043 |
| 0.4153778637714822 | 0.4053579201987034 | 0.6655481057392976 |
| 0.4793011597007180 | 0.3466334836357845 | 0.5315304056720649 |

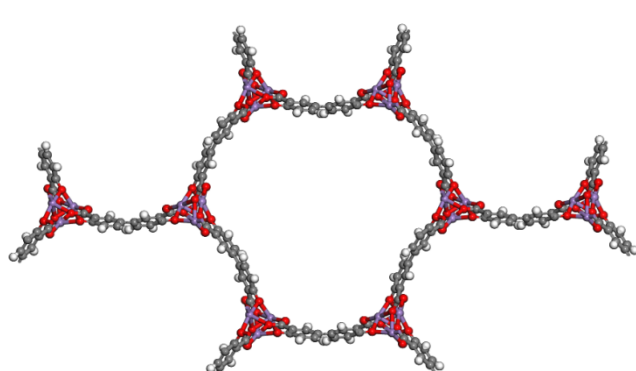

front view

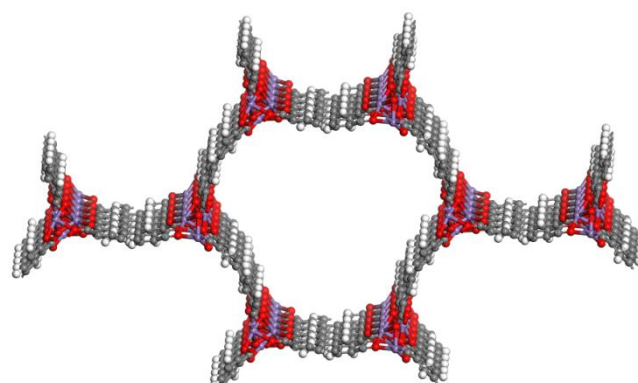

oblique view

Mn<sub>2</sub>(dobpdc)

1.0000000000000000

21.7614510076064072 0.0119325517162524 -0.0340747053853164

-10.8703916108849370 18.8519356716440569 0.0340747053852986

-0.0080700589153812 0.0046592506871675 7.0279645915923341

Mn O C H

6 18 42 18

Direct

0.3439011947396082 0.7243614743139517 0.8098136732779935

0.2756925512727975 0.6197078864079515 0.1437208229133233

0.3803913936193339 0.6561427021262602 0.4768689930748806

0.7243614743139517 0.3439011947396082 0.1901862967220111

0.6197078864079515 0.2756925512727975 0.8562791620866861

|                    |                    |                    |
|--------------------|--------------------|--------------------|
| 0.6561427021262602 | 0.3803913936193339 | 0.5231310069251123 |
| 0.4248369325008241 | 0.7580048276180023 | 0.6032428268796792 |
| 0.3690482797161465 | 0.7156782382041484 | 0.2439584602139178 |
| 0.3967563981665378 | 0.7995981619453687 | 0.0234445220245760 |
| 0.2420030969135638 | 0.6672508146846354 | 0.9364327385491507 |
| 0.2843859172316030 | 0.6535408432760832 | 0.5773428696645269 |
| 0.2004646709840401 | 0.5968273779249600 | 0.3576016545256593 |
| 0.3332912907655938 | 0.5750230148355868 | 0.2706256442360413 |
| 0.3463482331525967 | 0.6309367796114245 | 0.9113135348120878 |
| 0.4029276910849404 | 0.6037038972434985 | 0.6917237446004378 |
| 0.7580048276180023 | 0.4248369325008241 | 0.3967571731203208 |
| 0.7156782382041484 | 0.3690482797161465 | 0.7560415397860822 |
| 0.7995981619453687 | 0.3967563981665378 | 0.9765554549754256 |
| 0.6672508146846354 | 0.2420030969135638 | 0.0635672464508517 |
| 0.6535408432760832 | 0.2843859172316030 | 0.4226571603354756 |
| 0.5968273779249600 | 0.2004646709840401 | 0.6423983454743407 |
| 0.5750230148355868 | 0.3332912907655938 | 0.7293743857639612 |
| 0.6309367796114245 | 0.3463482331525967 | 0.0886864791879134 |
| 0.6037038972434985 | 0.4029276910849404 | 0.3082762553995551 |
| 0.4598138488652026 | 0.8226239300395051 | 0.5223107325084513 |
| 0.4516607885916031 | 0.8364410547124592 | 0.3275740410648353 |
| 0.4893560127778827 | 0.9064308501264406 | 0.2586606972210959 |
| 0.5354876825813477 | 0.9634897067195922 | 0.3719172531052735 |
| 0.5440146203023843 | 0.9488137322943118 | 0.5628704529981832 |
| 0.5074201950721644 | 0.8806254381081828 | 0.6358506624492009 |
| 0.4034391596592428 | 0.7814690735495873 | 0.1915245508679462 |
| 0.1774095001331588 | 0.6375621863359271 | 0.8551477827768394 |
| 0.1635619648771893 | 0.6150339361540986 | 0.6610830532037184 |
| 0.0935413381752568 | 0.5825029467688765 | 0.5922864639761514 |
| 0.0364986389101389 | 0.5720761010438693 | 0.7047020673114872 |
| 0.0512117862302688 | 0.5960406559637121 | 0.8947113727786515 |
| 0.1194161686462891 | 0.6277258428364476 | 0.9677500182629615 |
| 0.2185606035480276 | 0.6218056162409908 | 0.5252805603838979 |
| 0.3628132368129187 | 0.5399832335571020 | 0.1897160509869096 |
| 0.3846946638137396 | 0.5483263254607351 | 0.9952051716805457 |
| 0.4168221265618470 | 0.5105813404349675 | 0.9259996807668429 |
| 0.4276565401249428 | 0.4640892646176837 | 0.0386285036114771 |
| 0.4045905103640592 | 0.4553562374582967 | 0.2294623627915513 |
| 0.3731988018783525 | 0.4920656672330921 | 0.3027793042088760 |
| 0.3779459598696349 | 0.5967347785849952 | 0.8593278117679617 |
| 0.8226239300395051 | 0.4598138488652026 | 0.4776892974915512 |
| 0.8364410547124592 | 0.4516607885916031 | 0.6724259889351600 |
| 0.9064308501264406 | 0.4893560127778827 | 0.7413393327789208 |
| 0.9634897067195922 | 0.5354876825813477 | 0.6280827768947290 |
| 0.9488137322943118 | 0.5440146203023843 | 0.4371295170018143 |
| 0.8806254381081828 | 0.5074201950721644 | 0.3641493085507932 |

|                    |                    |                    |
|--------------------|--------------------|--------------------|
| 0.7814690735495873 | 0.4034391596592428 | 0.8084754491320609 |
| 0.6375621863359271 | 0.1774095001331588 | 0.1448522172231606 |
| 0.6150339361540986 | 0.1635619648771893 | 0.3389169467962745 |
| 0.5825029467688765 | 0.0935413381752568 | 0.4077135360238486 |
| 0.5720761010438693 | 0.0364986389101389 | 0.2952979626885082 |
| 0.5960406559637121 | 0.0512117862302688 | 0.1052886342213526 |
| 0.6277258428364476 | 0.1194161686462891 | 0.0322499977370398 |
| 0.6218056162409908 | 0.2185606035480276 | 0.4747194696161188 |
| 0.5399832335571020 | 0.3628132368129187 | 0.8102839630130916 |
| 0.5483263254607351 | 0.3846946638137396 | 0.0047948303194545 |
| 0.5105813404349675 | 0.4168221265618470 | 0.0740003192331571 |
| 0.4640892646176837 | 0.4276565401249428 | 0.9613714883885223 |
| 0.4553562374582967 | 0.4045905103640592 | 0.7705376372084487 |
| 0.4920656672330921 | 0.3731988018783525 | 0.6972206957911240 |
| 0.5967347785849952 | 0.3779459598696349 | 0.1406722032320431 |
| 0.4796570575179828 | 0.9150385100598584 | 0.1113204149096347 |
| 0.5809676647977824 | 0.9920510533677671 | 0.6546582301336699 |
| 0.5144671004914514 | 0.8698359823448740 | 0.7836698202720385 |
| 0.0849060264278592 | 0.5636791452186145 | 0.4456919059595208 |
| 0.0080252637361156 | 0.5903311797101765 | 0.9856627495820902 |
| 0.1302205826577492 | 0.6461753724659189 | 0.1148557327648447 |
| 0.4350765266085972 | 0.5205446622826244 | 0.7788651415724956 |
| 0.4108393544267770 | 0.4181817888028334 | 0.3209985706131633 |
| 0.3554736518041608 | 0.4848132539028569 | 0.4505049090616495 |
| 0.9150385100598584 | 0.4796570575179828 | 0.8886795700903605 |
| 0.9920510533677671 | 0.5809676647977824 | 0.3453417698663301 |
| 0.8698359823448740 | 0.5144671004914514 | 0.2163301797279615 |
| 0.5636791452186145 | 0.0849060264278592 | 0.5543080940404792 |
| 0.5903311797101765 | 0.0080252637361156 | 0.0143372294179116 |
| 0.6461753724659189 | 0.1302205826577492 | 0.8851442972351578 |
| 0.5205446622826244 | 0.4350765266085972 | 0.2211348284275019 |
| 0.4181817888028334 | 0.4108393544267770 | 0.6790014003868521 |
| 0.4848132539028569 | 0.3554736518041608 | 0.5494950609383480 |

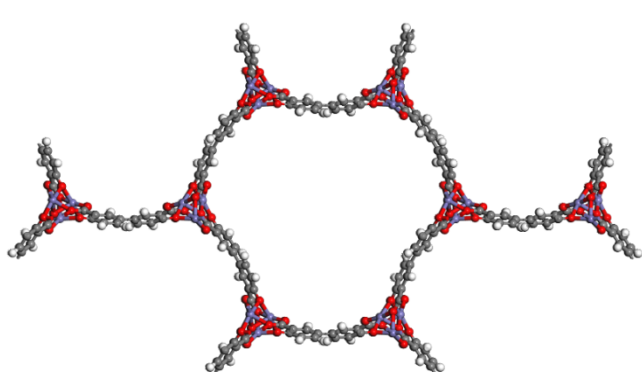

front view

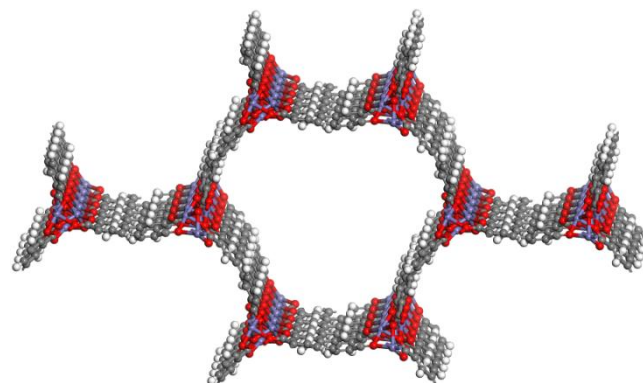

oblique view

Fe<sub>2</sub>(dobpdc)

1.0000000000000000

|                      |                     |                     |
|----------------------|---------------------|---------------------|
| 21.7085691487163430  | -0.0081161322350177 | 0.0002819678318189  |
| -10.8613133510541555 | 18.7961142964703818 | -0.0002819678318187 |
| 0.0000885672625172   | -0.0000511343328557 | 6.8592979835617411  |

|    |    |    |    |
|----|----|----|----|
| Fe | O  | C  | H  |
| 6  | 18 | 42 | 18 |

Direct

|                    |                    |                     |
|--------------------|--------------------|---------------------|
| 0.3416407464007989 | 0.7209389486839939 | 0.8113186229439364  |
| 0.2789788351802400 | 0.6204445215744343 | 0.1446454151019694  |
| 0.3794695187374160 | 0.6583438335935980 | 0.4780263997954677  |
| 0.7209389486839939 | 0.3416407464007989 | 0.1886813470560611  |
| 0.6204445215744343 | 0.2789788351802400 | 0.8553545698980329  |
| 0.6583438335935980 | 0.3794695187374160 | 0.5219736002045323  |
| 0.4248071961334219 | 0.7572604298349503 | 0.6094513855610089  |
| 0.3720376460990806 | 0.7144399048934176 | 0.2440276872695080  |
| 0.3965844701908523 | 0.7969503010490726 | 0.0160772318649549  |
| 0.2427360746444762 | 0.6673362920168273 | 0.9426903698879272  |
| 0.2855070036103058 | 0.6573612675455038 | 0.5773347265718840  |
| 0.2029880642901460 | 0.5994083277527835 | 0.3493329676894845  |
| 0.3325759192037268 | 0.5751759376188588 | 0.2760767452687745  |
| 0.3425111076614584 | 0.6278915778784295 | 0.9106839761374985  |
| 0.4005497003962972 | 0.6034658368034655 | 0.6827850209228572  |
| 0.7572604298349503 | 0.4248071961334219 | 0.3905486144389911  |
| 0.7144399048934176 | 0.3720376460990806 | 0.7559723127304920  |
| 0.7969503010490726 | 0.3965844701908523 | 0.9839227451350467  |
| 0.6673362920168273 | 0.2427360746444762 | 0.0573096151120751  |
| 0.6573612675455038 | 0.2855070036103058 | 0.4226653034281114  |
| 0.5994083277527835 | 0.2029880642901460 | 0.6506670323105226  |
| 0.5751759376188588 | 0.3325759192037268 | 0.7239232847312280  |
| 0.6278915778784295 | 0.3425111076614584 | 0.0893160378625026  |
| 0.6034658368034655 | 0.4005497003962972 | 0.3172149790771428  |
| 0.4600324436635717 | 0.8220503345574883 | 0.52671444045984367 |
| 0.4518524569702080 | 0.8359219001859231 | 0.3273157540526270  |
| 0.4889768930422065 | 0.9061495230080041 | 0.2567409572209343  |
| 0.5354699523264301 | 0.9633811438158375 | 0.3724711380626431  |
| 0.5447722343379127 | 0.9486079922144910 | 0.5672730307879448  |
| 0.5082282135289731 | 0.8802873045408219 | 0.6424426741421527  |
| 0.4045984054274712 | 0.7802317386783386 | 0.1887771197087460  |
| 0.1779629704546082 | 0.6378384663610035 | 0.8599254374756455  |
| 0.1640664007029784 | 0.6157892282411055 | 0.6605091648146484  |
| 0.0938530502297681 | 0.5827549926679367 | 0.5898690914166025  |
| 0.0366620787701990 | 0.5720830238028682 | 0.7055664673361122  |
| 0.0514653004085375 | 0.5961613969664938 | 0.9003836849099045  |
| 0.1197706226691935 | 0.6278728257300443 | 0.9756096772385945  |
| 0.2197220613514403 | 0.6241613925642611 | 0.5220342862357228  |
| 0.3621184138043319 | 0.5399714306175412 | 0.1933556931285452  |
| 0.3841774850785669 | 0.5481570545688186 | 0.9939519273121462  |

|                    |                    |                    |
|--------------------|--------------------|--------------------|
| 0.4172548729644419 | 0.5110572582212569 | 0.9233397927234250 |
| 0.4279559006974551 | 0.4645726213789274 | 0.0390351323236189 |
| 0.4038788989459192 | 0.4552707539970910 | 0.2338571319043723 |
| 0.3721330969354710 | 0.4917955939147376 | 0.3090670244361107 |
| 0.3757686961997493 | 0.5953962163539117 | 0.8554531792813478 |
| 0.8220503345574883 | 0.4600324436635717 | 0.4732856254015587 |
| 0.8359219001859231 | 0.4518524569702080 | 0.6726842759473683 |
| 0.9061495230080041 | 0.4889768930422065 | 0.7432590727790753 |
| 0.9633811438158375 | 0.5354699523264301 | 0.6275288919373594 |
| 0.9486079922144910 | 0.5447722343379127 | 0.4327269392120527 |
| 0.8802873045408219 | 0.5082282135289731 | 0.3575572968578413 |
| 0.7802317386783386 | 0.4045984054274712 | 0.8112228802912540 |
| 0.6378384663610035 | 0.1779629704546082 | 0.1400745625243545 |
| 0.6157892282411055 | 0.1640664007029784 | 0.3394908351853445 |
| 0.5827549926679367 | 0.0938530502297681 | 0.4101309085833975 |
| 0.5720830238028682 | 0.0366620787701990 | 0.2944335626638832 |
| 0.5961613969664938 | 0.0514653004085375 | 0.0996163220900996 |
| 0.6278728257300443 | 0.1197706226691935 | 0.0243903387614068 |
| 0.6241613925642611 | 0.2197220613514403 | 0.4779657437642868 |
| 0.5399714306175412 | 0.3621184138043319 | 0.8066443208714631 |
| 0.5481570545688186 | 0.3841774850785669 | 0.0060480746878540 |
| 0.5110572582212569 | 0.4172548729644419 | 0.0766602072765750 |
| 0.4645726213789274 | 0.4279559006974551 | 0.9609648596763805 |
| 0.4552707539970910 | 0.4038788989459192 | 0.7661428680956277 |
| 0.4917955939147376 | 0.3721330969354710 | 0.6909329755638893 |
| 0.5953962163539117 | 0.3757686961997493 | 0.1445468357186570 |
| 0.4787569691704761 | 0.9146950832270946 | 0.1063369295681014 |
| 0.5824666345777132 | 0.9920550205595262 | 0.6601614643936458 |
| 0.5158636097497293 | 0.8695210000789473 | 0.7932106450288501 |
| 0.0852818581341737 | 0.5639874095587700 | 0.4394526498084730 |
| 0.0080517957503474 | 0.5904620585701252 | 0.9932331911144985 |
| 0.1305590349232517 | 0.6462839972915120 | 0.1263800094594103 |
| 0.4360245291922453 | 0.5212865056562137 | 0.7729283719875042 |
| 0.4096016528675221 | 0.4175858514861517 | 0.3267306136516481 |
| 0.3537295612273397 | 0.4841512362890086 | 0.4598456319862123 |
| 0.9146950832270946 | 0.4787569691704761 | 0.8936630554318938 |
| 0.9920550205595262 | 0.5824666345777132 | 0.3398385356063542 |
| 0.8695210000789473 | 0.5158636097497293 | 0.2067893549711499 |
| 0.5639874095587700 | 0.0852818581341737 | 0.5605473501915270 |
| 0.5904620585701252 | 0.0080517957503474 | 0.0067667878855033 |
| 0.6462839972915120 | 0.1305590349232517 | 0.8736200205405922 |
| 0.5212865056562137 | 0.4360245291922453 | 0.2270715980124933 |
| 0.4175858514861517 | 0.4096016528675221 | 0.6732693573483530 |
| 0.4841512362890086 | 0.3537295612273397 | 0.5401543380137852 |

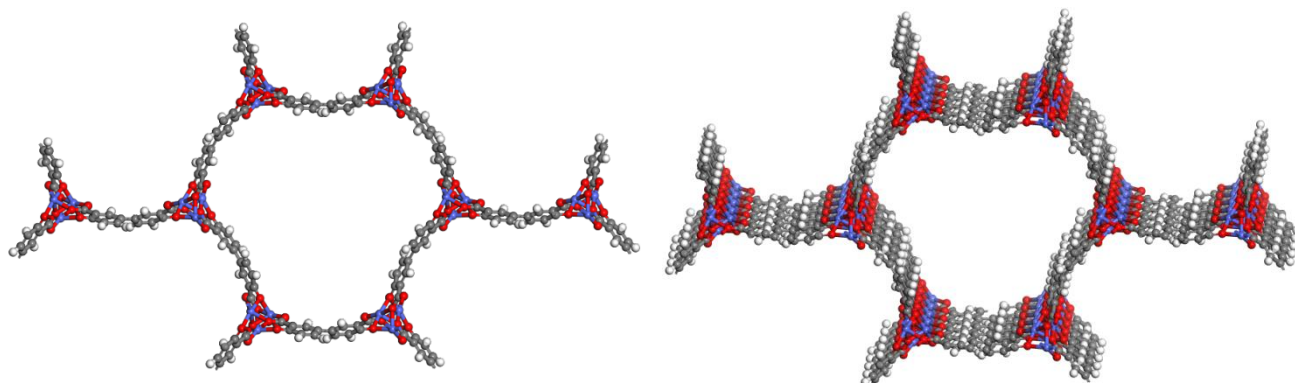

front view

oblique view

Co<sub>2</sub>(dobpdc)

1.0000000000000000

21.5499427176144671 -0.0136138093837605 0.0009133588819679

-10.7867611770534584 18.6559683698481500 -0.0009168965897819

0.0003061595954869 -0.0001777397700373 6.7865293584655939

Co O C H

6 18 42 18

Direct

|                    |                    |                    |
|--------------------|--------------------|--------------------|
| 0.3444771665879713 | 0.7216257431580928 | 0.8041973810583229 |
| 0.2782657491461151 | 0.6224036264581798 | 0.1375374629856196 |
| 0.3774653973783231 | 0.6555301161229963 | 0.4708726389179319 |
| 0.7216260025239265 | 0.3444774823640273 | 0.1958022900861067 |
| 0.6224041858353999 | 0.2782663757977417 | 0.8624625034274018 |
| 0.6555302964594105 | 0.3774654609299120 | 0.5291270482765498 |
| 0.4242784837148719 | 0.7547311013130980 | 0.6061934154424335 |
| 0.3689574512708447 | 0.7130798176471487 | 0.2414797782222280 |
| 0.3946153858542942 | 0.7961391432603762 | 0.0103567728717309 |
| 0.2452878509858323 | 0.6691334224686472 | 0.9395310228693532 |
| 0.2868536269899664 | 0.6554608258786274 | 0.5748528319459396 |
| 0.2037666976744532 | 0.5980262636802749 | 0.3436846021720967 |
| 0.3306784435554917 | 0.5757247919108721 | 0.2728311366407468 |
| 0.3443894907965728 | 0.6309982564952819 | 0.9081536565516899 |
| 0.4018160961832749 | 0.6054468832572439 | 0.6769878702555729 |
| 0.7547312112392106 | 0.4242787352777810 | 0.3938066744760107 |
| 0.7130802763688493 | 0.3689568539367158 | 0.7585194203423953 |
| 0.7961395847306605 | 0.3946156515056387 | 0.9896448718370365 |
| 0.6691332609234735 | 0.2452877360763850 | 0.0604692334670247 |
| 0.6554608018326675 | 0.2868536896501936 | 0.4251457000436716 |
| 0.5980267069207628 | 0.2037670632194803 | 0.6563130878715953 |
| 0.5757253710731973 | 0.3306788266767171 | 0.7271693707649476 |
| 0.6309991083031790 | 0.3443914698440693 | 0.0918472472648588 |
| 0.6054465324829721 | 0.4018166123650246 | 0.3230148215603066 |
| 0.4604112168988621 | 0.8203202974532431 | 0.5239439092749905 |
| 0.4518202037150090 | 0.8349752949548233 | 0.3235358394032488 |
| 0.4897985926514110 | 0.9058464853309331 | 0.2533819318431796 |



|                    |                    |                    |
|--------------------|--------------------|--------------------|
| 0.5372874345787650 | 0.9629290036233442 | 0.3715660168219799 |
| 0.5471363142959689 | 0.9472339669242160 | 0.5670122065252698 |
| 0.5100013007169366 | 0.8781391497128013 | 0.6414004413870984 |
| 0.4027993174733950 | 0.7790114928247220 | 0.1846927689951343 |
| 0.1797322052236581 | 0.6398027024232462 | 0.8572057622304214 |
| 0.1650346322743061 | 0.6165645365405723 | 0.6567619360363466 |
| 0.0941881826961009 | 0.5838048998560197 | 0.5865049195314924 |
| 0.0371854785321304 | 0.5743524744262913 | 0.7046358017941330 |
| 0.0529396234387676 | 0.5998943541921662 | 0.9001170475163747 |
| 0.1220026129840122 | 0.6317159712467557 | 0.9746079905868967 |
| 0.2209301022036954 | 0.6233941163887948 | 0.5179921640331102 |
| 0.3600776039600575 | 0.5396145591631480 | 0.1905462220967991 |
| 0.3833351442156783 | 0.5482065315574971 | 0.9901195212923710 |
| 0.4161635094187801 | 0.5102429739271415 | 0.9199279458474550 |
| 0.4256701268448140 | 0.4627624277460924 | 0.0380977271988741 |
| 0.4001158742209441 | 0.4529220963012648 | 0.2335712297677119 |
| 0.3682282914612998 | 0.4900449838667313 | 0.3080002426320192 |
| 0.3764636391622389 | 0.5972141149163619 | 0.8513122193042264 |
| 0.8203205906268352 | 0.4604114412582376 | 0.4760571148946511 |
| 0.8349756615791009 | 0.4518204357286990 | 0.6764644405425670 |
| 0.9058465561446098 | 0.4897987304791016 | 0.7466179240111401 |
| 0.9629293854904049 | 0.5372876795969432 | 0.6284331880224059 |
| 0.9472340639214778 | 0.5471362268889592 | 0.4329884138474043 |
| 0.8781394221785632 | 0.5100016162265248 | 0.3585989198904826 |
| 0.7790119790259169 | 0.4027995457594002 | 0.8153059146167294 |
| 0.6398025895179060 | 0.1797322924327815 | 0.1427940457446226 |
| 0.6165646005880774 | 0.1650346384492849 | 0.3432373249898859 |
| 0.5838049153248335 | 0.0941881297122364 | 0.4134962719905175 |
| 0.5743524047617399 | 0.0371853416967340 | 0.2953637444056625 |
| 0.5998941490869569 | 0.0529395077990173 | 0.0998829882853300 |
| 0.6317158445804409 | 0.1220025569560050 | 0.0253916397372649 |
| 0.6233939444083489 | 0.2209300299959978 | 0.4820091623612583 |
| 0.5396147822790383 | 0.3600777989038519 | 0.8094535290740907 |
| 0.5482064793728725 | 0.3833358366891133 | 0.0098823154059318 |
| 0.5102425780256397 | 0.4161635918686883 | 0.0800701501213439 |
| 0.4627628520411733 | 0.4256702543028155 | 0.9619028833542345 |
| 0.4529219565828271 | 0.4001159873843818 | 0.7664276802229395 |
| 0.4900453760772763 | 0.3682283296617186 | 0.6919998691403819 |
| 0.5972146417514779 | 0.3764639017618308 | 0.1486864368854270 |
| 0.4793154149293883 | 0.9151732314334566 | 0.1022283602350598 |
| 0.5856724708062728 | 0.9905984410040247 | 0.6610135319029666 |
| 0.5180796458782169 | 0.8665116567518041 | 0.7926211416028721 |
| 0.0848058494764317 | 0.5639872358649214 | 0.4353354693375309 |
| 0.0096433019323214 | 0.5951745843704828 | 0.9940659624177357 |
| 0.1336792524884487 | 0.6514268863693857 | 0.1258479855525394 |
| 0.4359862774731695 | 0.5207237303723247 | 0.7687599821577678 |

|                    |                    |                    |
|--------------------|--------------------|--------------------|
| 0.4048728663382093 | 0.4143922393382553 | 0.3275563026834973 |
| 0.3485138197599511 | 0.4819705771478411 | 0.4592392723633552 |
| 0.9151735210115248 | 0.4793158842244978 | 0.8977721289507272 |
| 0.9905986543623087 | 0.5856726452588674 | 0.3389862702967648 |
| 0.8665117649979805 | 0.5180797715062297 | 0.2073792794152993 |
| 0.5639877973788003 | 0.0848057555172730 | 0.5646651052318745 |
| 0.5951746689379362 | 0.0096433718041808 | 0.0059337686126426 |
| 0.6514264651308466 | 0.1336792484012577 | 0.8741519425026425 |
| 0.5207233597187084 | 0.4359860994622764 | 0.2312403406614791 |
| 0.4143923687963280 | 0.4048724349967401 | 0.6724437583349783 |
| 0.4819710524190342 | 0.3485138609531688 | 0.5407608197253424 |

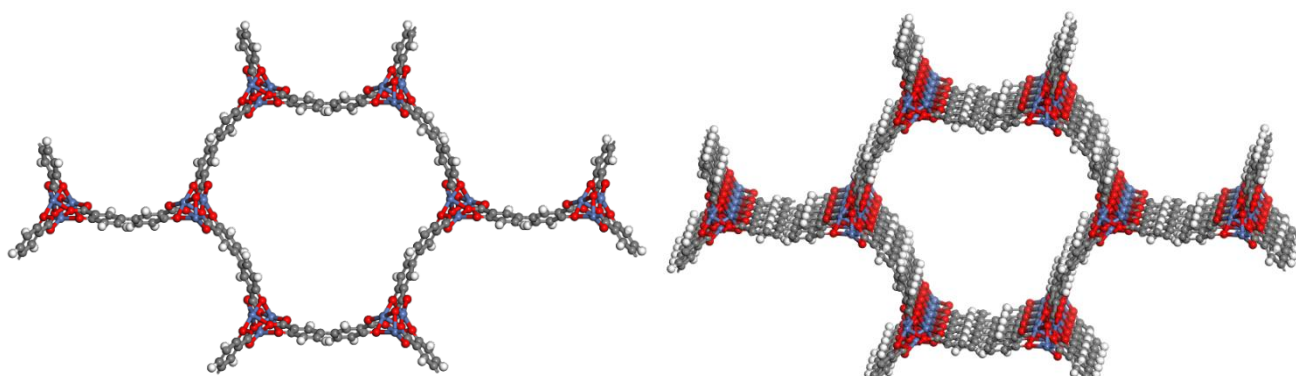

front view

oblique view

$\text{Ni}_2(\text{dobpdc})$

1.0000000000000000

21.4511183061743154 -0.0100300495954671 0.0007646173181731

-10.7342454810580001 18.5721997502836942 -0.0007640466511830

0.0002403665072782 -0.0001385516376156 6.7234832999832230

Ni O C H

6 18 42 18

Direct

|                    |                    |                    |
|--------------------|--------------------|--------------------|
| 0.3404108571429134 | 0.7182880051959373 | 0.8055351626138574 |
| 0.2816152420273852 | 0.6217777609059212 | 0.1388735755085975 |
| 0.3781351660956815 | 0.6596027385286831 | 0.4721257674795183 |
| 0.7182880092535768 | 0.3404108810677329 | 0.1944649009822825 |
| 0.6217777544024869 | 0.2816151952339112 | 0.8611265243258117 |
| 0.6596026972131597 | 0.3781351111821110 | 0.5278742775392402 |
| 0.4250431844120399 | 0.7537029879262889 | 0.6143564820636129 |
| 0.3698067717666049 | 0.7109495735036404 | 0.2398417401163897 |
| 0.3933027046762945 | 0.7941005967598116 | 0.0085893102931536 |
| 0.2463193593287158 | 0.6710549253628386 | 0.9477072416608436 |
| 0.2890103748930741 | 0.6585615101581013 | 0.5732007755946285 |
| 0.2058277981473822 | 0.5988647066540267 | 0.3419369594481125 |
| 0.3288186147429784 | 0.5749506476833162 | 0.2810087262267587 |
| 0.3413157887752121 | 0.6301311357864421 | 0.9065025151519421 |
| 0.4010356568083893 | 0.6067632631363153 | 0.6752339157296987 |
| 0.7537029766554042 | 0.4250432246257816 | 0.3856435587695657 |

|                    |                    |                    |
|--------------------|--------------------|--------------------|
| 0.7109495788698723 | 0.3698066784009058 | 0.7601581868797140 |
| 0.7941006071321084 | 0.3933028364165025 | 0.9914107370616634 |
| 0.6710549730731969 | 0.2463193520980411 | 0.0522928673226133 |
| 0.6585615064865493 | 0.2890103792729519 | 0.4267991997842486 |
| 0.5988647668578295 | 0.2058277949025111 | 0.6580630939827827 |
| 0.5749506151824377 | 0.3288185407612829 | 0.7189913265810191 |
| 0.6301310795081179 | 0.3413157163327085 | 0.0934975143480514 |
| 0.6067631619128022 | 0.4010355447206280 | 0.3247661343702291 |
| 0.4591801965615687 | 0.8193370375937832 | 0.5289550095684419 |
| 0.4499203069172211 | 0.8337720404487996 | 0.3263213796601718 |
| 0.4868637086615379 | 0.9049625339101084 | 0.2549345806800432 |
| 0.5342278918123142 | 0.9628689369744023 | 0.3728333590980952 |
| 0.5445388743449087 | 0.9476543489567248 | 0.5702965906729318 |
| 0.5083546489135600 | 0.8783368251066364 | 0.6461881926809880 |
| 0.4020449282146004 | 0.7776551144915231 | 0.1839458853213998 |
| 0.1807030333588173 | 0.6396420379791152 | 0.8622518939542658 |
| 0.1662344450590751 | 0.6159442237891639 | 0.6595987523153113 |
| 0.0950567580254784 | 0.5817927864559067 | 0.5881487830761714 |
| 0.0372070951179708 | 0.5713540164563256 | 0.7060030189364142 |
| 0.0524657794172398 | 0.5968838191369272 | 0.9034901170021001 |
| 0.1217673493992493 | 0.6299247564545567 | 0.9794369465478141 |
| 0.2223063030637249 | 0.6241033293733622 | 0.5172728042228556 |
| 0.3602783597426864 | 0.5408332839863803 | 0.1955705045245537 |
| 0.3839901606059044 | 0.5500989041895750 | 0.9929236264960295 |
| 0.4181900165146430 | 0.5131661508139302 | 0.9215270387572261 |
| 0.4286673709121445 | 0.4658087691195334 | 0.0394141661108947 |
| 0.4031291007863729 | 0.4555006849484258 | 0.2368876971614782 |
| 0.3700403432263144 | 0.4916722167632699 | 0.3127875815417624 |
| 0.3757975833184943 | 0.5979625940353301 | 0.8505710507290587 |
| 0.8193370455277957 | 0.4591802537590866 | 0.4710449060691317 |
| 0.8337720250149872 | 0.4499203532382694 | 0.6736786297674939 |
| 0.9049624825308129 | 0.4868637485926897 | 0.7450653667885305 |
| 0.9628689385282243 | 0.5342279374260244 | 0.6271665472430357 |
| 0.9476543294110584 | 0.5445388786129968 | 0.4297033764426530 |
| 0.8783367755191733 | 0.5083546546513418 | 0.3538117507565488 |
| 0.7776551121851796 | 0.4020449635293843 | 0.8160541508974575 |
| 0.6396420830217266 | 0.1807030543501398 | 0.1377481259913651 |
| 0.6159442657419305 | 0.1662344625778687 | 0.3404012406754120 |
| 0.5817928093997082 | 0.0950567667409175 | 0.4118512023219267 |
| 0.5713540011331517 | 0.0372070778656024 | 0.2939970064684800 |
| 0.5968838298647370 | 0.0524658038217680 | 0.0965099184677314 |
| 0.6299247976122615 | 0.1217673931362881 | 0.0205631021637842 |
| 0.6241033653951291 | 0.2223063065914914 | 0.4827272237367026 |
| 0.5408332270545628 | 0.3602782854815061 | 0.8044294677003947 |
| 0.5500988481742155 | 0.3839901034830859 | 0.0070763588866001 |
| 0.5131661284894022 | 0.4181899778877707 | 0.0784729143851450 |

|                    |                    |                    |
|--------------------|--------------------|--------------------|
| 0.4658087562266218 | 0.4286673471046569 | 0.9605857476416233 |
| 0.4555006538683841 | 0.4031290436464587 | 0.7631123037453449 |
| 0.4916721584024515 | 0.3700402400737559 | 0.6872124269587587 |
| 0.5979625342310442 | 0.3757975105855849 | 0.1494290157993561 |
| 0.4759411404066114 | 0.9137014417583273 | 0.1021342059034396 |
| 0.5829749732000522 | 0.9915807844798437 | 0.6646768276891279 |
| 0.5171291754852803 | 0.8672675157299992 | 0.7988060847668095 |
| 0.0862741791060984 | 0.5621166323055959 | 0.4353415865790566 |
| 0.0085930506784493 | 0.5914702797006015 | 0.9978564659642473 |
| 0.1328750818197264 | 0.6497789641656482 | 0.1320663706167551 |
| 0.4378662686340036 | 0.5240861487475925 | 0.7687181689701106 |
| 0.4085679909571667 | 0.4170760430770954 | 0.3312796589658760 |
| 0.3501793046648842 | 0.4828933487411433 | 0.4654067979763781 |
| 0.9137014160363890 | 0.4759411983487070 | 0.8978657445865608 |
| 0.9915808030110611 | 0.5829749624352161 | 0.3353230542646841 |
| 0.8672675369874980 | 0.5171292205506788 | 0.2011938589840483 |
| 0.5621166536224607 | 0.0862741774302904 | 0.5646584778591119 |
| 0.5914702897166464 | 0.0085930666500076 | 0.0021434856348463 |
| 0.6497789957887505 | 0.1328751129067811 | 0.8679336775405986 |
| 0.5240861122012106 | 0.4378662349531268 | 0.2312817853425813 |
| 0.4170760066583767 | 0.4085679207983333 | 0.6687202946406430 |
| 0.4828932653547469 | 0.3501791774641774 | 0.5345932609153223 |

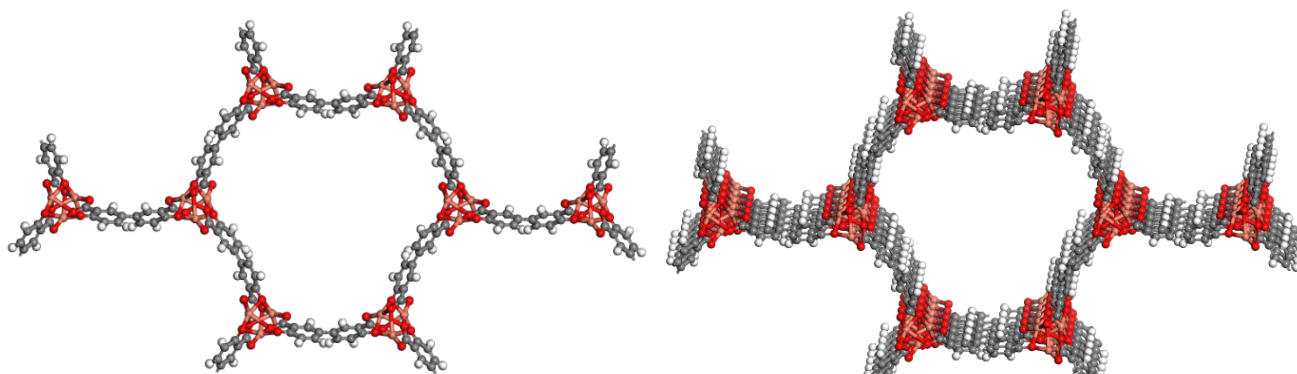

front view

oblique view

$\text{Cu}_2(\text{dobpdc})$

1.0000000000000000

21.6870277772275060 -0.0111877871221055 0.0008400811613830

-10.8532027964736049 18.7759230940852042 -0.0008400811613824

0.0002904851802265 -0.0001677116969993 6.1213058133386049

Cu O C H

6 18 42 18

Direct

0.3329876536392860 0.7245330597291613 0.7603079096410923

0.2753696925001137 0.6080683440192658 0.0936187468922398

0.3918453126942794 0.6670493946906078 0.4269527756743656

0.7245330597291613 0.3329876536392860 0.2396920603589123

0.6080683440192658 0.2753696925001137 0.9063812381077625

|                    |                    |                    |
|--------------------|--------------------|--------------------|
| 0.6670493946906078 | 0.3918453126942794 | 0.5730472243256344 |
| 0.4256320618337099 | 0.7531941607222734 | 0.6063525454420571 |
| 0.3927676425821147 | 0.7166494981208231 | 0.1638064061925277 |
| 0.3811254663648711 | 0.7985699809161915 | 0.9799114090643712 |
| 0.2468353790471483 | 0.6720955980208316 | 0.9396466245935997 |
| 0.2833658094174112 | 0.6758042249957370 | 0.4971237970983182 |
| 0.2013344690578620 | 0.5821651861858967 | 0.3132003209683205 |
| 0.3277580424332598 | 0.5743858193576941 | 0.2729687735441573 |
| 0.3240893483329970 | 0.6072089850586906 | 0.8304647372067535 |
| 0.4177059881237852 | 0.6189352606241698 | 0.6465108535670581 |
| 0.7531941607222734 | 0.4256320618337099 | 0.3936474545579429 |
| 0.7166494981208231 | 0.3927676425821147 | 0.8361935938074723 |
| 0.7985699809161915 | 0.3811254663648711 | 0.0200885679356304 |
| 0.6720955980208316 | 0.2468353790471483 | 0.0603533604064026 |
| 0.6758042249957370 | 0.2833658094174112 | 0.5028762329016843 |
| 0.5821651861858967 | 0.2013344690578620 | 0.6867996790316795 |
| 0.5743858193576941 | 0.3277580424332598 | 0.7270312564558452 |
| 0.6072089850586906 | 0.3240893483329970 | 0.1695352767932476 |
| 0.6189352606241698 | 0.4177059881237852 | 0.3534891464329419 |
| 0.4610924423154117 | 0.8194408335068672 | 0.5215588469123418 |
| 0.4478960958260672 | 0.8362534971881601 | 0.3084447385677223 |
| 0.4820472819301074 | 0.9076310489846335 | 0.2392744384841237 |
| 0.5323364411517204 | 0.9624925623913398 | 0.3709406422639958 |
| 0.5482967347600081 | 0.9443221862447686 | 0.5751533090185319 |
| 0.5138234671699919 | 0.8746527986780421 | 0.6504464882717542 |
| 0.4039564979915511 | 0.7806155553435872 | 0.1463028136371989 |
| 0.1806092432976456 | 0.6413918724183461 | 0.8547875183185170 |
| 0.1637392349927040 | 0.6113839986347358 | 0.6416216158138610 |
| 0.0923667605632517 | 0.5742684461112404 | 0.5723246024879813 |
| 0.0375863567480081 | 0.5698211257273371 | 0.7039303743570855 |
| 0.0558311481542120 | 0.6039428979098247 | 0.9082161157555220 |
| 0.1254862519367919 | 0.6390228953950086 | 0.9836317732995283 |
| 0.2193476897880728 | 0.6230082548627252 | 0.4795597019174380 |
| 0.3584958018560513 | 0.5389394205230147 | 0.1881462117367576 |
| 0.3885204602525150 | 0.5521327891972803 | 0.9750030180328579 |
| 0.4256900485254249 | 0.5179850746639971 | 0.9057839756730317 |
| 0.4301803987397648 | 0.4676978019069011 | 0.0374327717747747 |
| 0.3960354875057490 | 0.4517498172420957 | 0.2416852966660983 |
| 0.3609008575393418 | 0.4862206173011216 | 0.3170256443891901 |
| 0.3768761718654829 | 0.5960649548984094 | 0.8129042361249006 |
| 0.8194408335068672 | 0.4610924423154117 | 0.4784411830876607 |
| 0.8362534971881601 | 0.4478960958260672 | 0.6915552914322731 |
| 0.9076310489846335 | 0.4820472819301074 | 0.7607255915158859 |
| 0.9624925623913398 | 0.5323364411517204 | 0.6290593877360067 |
| 0.9443221862447686 | 0.5482967347600081 | 0.4248466609814798 |
| 0.8746527986780421 | 0.5138234671699919 | 0.3495534827282398 |

|                    |                    |                    |
|--------------------|--------------------|--------------------|
| 0.7806155553435872 | 0.4039564979915511 | 0.8536971863628011 |
| 0.6413918724183461 | 0.1806092432976456 | 0.1452124816814830 |
| 0.6113839986347358 | 0.1637392349927040 | 0.3583783841861319 |
| 0.5742684461112404 | 0.0923667605632517 | 0.4276753975120258 |
| 0.5698211257273371 | 0.0375863567480081 | 0.2960696556429099 |
| 0.6039428979098247 | 0.0558311481542120 | 0.0917838912444822 |
| 0.6390228953950086 | 0.1254862519367919 | 0.0163682427004730 |
| 0.6230082548627252 | 0.2193476897880728 | 0.5204403280825716 |
| 0.5389394205230147 | 0.3584958018560513 | 0.8118538022632436 |
| 0.5521327891972874 | 0.3885204602525150 | 0.0249969839671351 |
| 0.5179850746639971 | 0.4256900485254249 | 0.0942160243269683 |
| 0.4676978019069011 | 0.4301803987397648 | 0.9625672202252247 |
| 0.4517498172420957 | 0.3960354875057490 | 0.7583147033339017 |
| 0.4862206173011216 | 0.3609008575393418 | 0.6829743556108099 |
| 0.5960649548984094 | 0.3768761718654829 | 0.1870957788751042 |
| 0.4682106023971357 | 0.9189827171752043 | 0.0788180369316862 |
| 0.5895500377745577 | 0.9863390670490659 | 0.6751669329949479 |
| 0.5268433425307038 | 0.8609728517637905 | 0.8084796577815112 |
| 0.0809565689333951 | 0.5490714504283645 | 0.4118299468936755 |
| 0.0138824602318479 | 0.6032658103163584 | 0.0081866129029748 |
| 0.1392270884334295 | 0.6657278632391979 | 0.1417074786974268 |
| 0.4508955620527431 | 0.5318207230145049 | 0.7453036860023587 |
| 0.3967345312230464 | 0.4105024180846826 | 0.3416921048406820 |
| 0.3341850469133263 | 0.4732020689311582 | 0.4750833153674137 |
| 0.9189827171752043 | 0.4682106023971357 | 0.9211819480683090 |
| 0.9863390670490659 | 0.5895500377745577 | 0.3248330670050521 |
| 0.8609728517637905 | 0.5268433425307038 | 0.1915203422184888 |
| 0.5490714504283645 | 0.0809565689333951 | 0.5881700531063245 |
| 0.6032658103163584 | 0.0138824602318479 | 0.9918133660970270 |
| 0.6657278632391979 | 0.1392270884334295 | 0.8582925513025756 |
| 0.5318207230145049 | 0.4508955620527431 | 0.2546962839976459 |
| 0.4105024180846826 | 0.3967345312230464 | 0.6583078661593191 |
| 0.4732020689311582 | 0.3341850469133263 | 0.5249166546325839 |

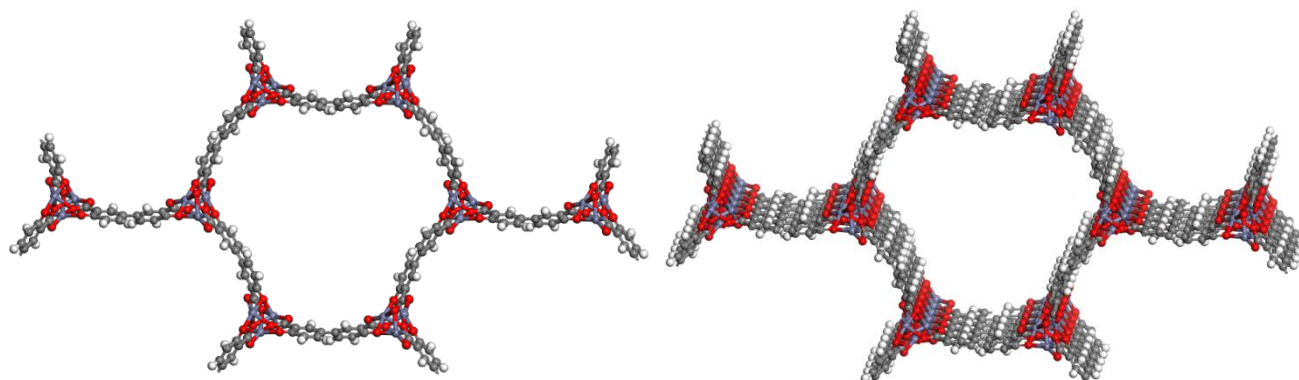

front view

oblique view

Zn<sub>2</sub>(dobpdc)

1.00000000000000

|                      |                     |                     |
|----------------------|---------------------|---------------------|
| 21.6320173210187860  | -0.0109858863941495 | 0.0002372436459730  |
| -10.8255227172097985 | 18.7283835918987265 | -0.0002372436459729 |
| 0.0000905943917369   | -0.0000523046964563 | 6.7033351900280858  |

|    |    |    |    |
|----|----|----|----|
| Zn | O  | C  | H  |
| 6  | 18 | 42 | 18 |

Direct

|                    |                    |                    |
|--------------------|--------------------|--------------------|
| 0.3413883363776691 | 0.7212590070870846 | 0.8005915132733321 |
| 0.2786604941233577 | 0.6197893591683368 | 0.1339986857034248 |
| 0.3800920273254249 | 0.6586198332188360 | 0.4671926881663637 |
| 0.7212590070870846 | 0.3413883363776691 | 0.1994084567266725 |
| 0.6197893591683368 | 0.2786604941233577 | 0.8660012992965775 |
| 0.6586198332188360 | 0.3800920273254249 | 0.5328073118336363 |
| 0.4264280184600366 | 0.7545837819622463 | 0.6071570755526352 |
| 0.3797488881309192 | 0.7125828809429038 | 0.2123857663590556 |
| 0.3936733021558396 | 0.7986791955907435 | 0.0034258271889911 |
| 0.2454366320819830 | 0.6715077561072462 | 0.9405062512550231 |
| 0.2873895734552576 | 0.6668883757001396 | 0.5456846533403379 |
| 0.2012413051920490 | 0.5945875267900362 | 0.3367976805178898 |
| 0.3283199052188266 | 0.5735534505059903 | 0.2737679316033024 |
| 0.3330370255687285 | 0.6202272350745659 | 0.8791094935703754 |
| 0.4051850768955703 | 0.6063496507776165 | 0.6699983942784442 |
| 0.7545837819622463 | 0.4264280184600366 | 0.3928429244473648 |
| 0.7125828809429038 | 0.3797488881309192 | 0.7876142336409373 |
| 0.7986791955907435 | 0.3936733021558396 | 0.9965741498110106 |
| 0.6715077561072462 | 0.2454366320819830 | 0.0594937337449792 |
| 0.6668883757001396 | 0.2873895734552576 | 0.4543153766596646 |
| 0.5945875267900362 | 0.2012413051920490 | 0.6632023194821102 |
| 0.5735534505059903 | 0.3283199052188266 | 0.7262320983967001 |
| 0.6202272350745659 | 0.3330370255687285 | 0.1208905204296258 |
| 0.6063496507776165 | 0.4051850768955703 | 0.3300016057215558 |
| 0.4599598217680878 | 0.8201168705749851 | 0.5227121160697905 |
| 0.4498328962769520 | 0.8348350382348144 | 0.3213215906727029 |
| 0.4852112827142676 | 0.9059067236204470 | 0.2528468384915925 |
| 0.5320952225234805 | 0.9630314757091512 | 0.3721200508255436 |
| 0.5434544414007263 | 0.9473731807619430 | 0.5682648613472239 |
| 0.5085466685495774 | 0.8782085938341169 | 0.6416230345157885 |
| 0.4050109312939583 | 0.7795786338693773 | 0.1733796556741964 |
| 0.1799159459541713 | 0.6395804213465084 | 0.8559905059884656 |
| 0.1651585541672134 | 0.6147462779815456 | 0.6545662506647218 |
| 0.0940977343231424 | 0.5791619530191525 | 0.5860018139738656 |
| 0.0370315702559338 | 0.5690329405911143 | 0.7052148421660718 |
| 0.0527429631308820 | 0.5960236020194145 | 0.9014110693140722 |
| 0.1218898728889997 | 0.6301608635273723 | 0.9748675332552281 |
| 0.2203716608404136 | 0.6251075613762680 | 0.5066959221508256 |
| 0.3603098156636335 | 0.5400682630962663 | 0.1893036213399455 |
| 0.3851570463199323 | 0.5501956314050105 | 0.9878971154559011 |

|                    |                    |                    |
|--------------------|--------------------|--------------------|
| 0.4208148731707553 | 0.5148444817858362 | 0.9193895351506143 |
| 0.4310068963990688 | 0.4679789787509563 | 0.0386572758464752 |
| 0.4040016717129475 | 0.4566400827198862 | 0.2348367680139916 |
| 0.3697876840713903 | 0.4915246564177025 | 0.3082371849449075 |
| 0.3747488396720584 | 0.5949953742707095 | 0.8399929294300748 |
| 0.8201168705749851 | 0.4599598217680878 | 0.4772879139302120 |
| 0.8348350382348144 | 0.4498328962769520 | 0.6786784393272924 |
| 0.9059067236204470 | 0.4852112827142676 | 0.7471531915084171 |
| 0.9630314757091512 | 0.5320952225234805 | 0.6278799791744589 |
| 0.9473731807619430 | 0.5434544414007263 | 0.4317351086527736 |
| 0.8782085938341169 | 0.5085466685495774 | 0.3583769364842055 |
| 0.7795786338693773 | 0.4050109312939583 | 0.8266203443258036 |
| 0.6395804213465084 | 0.1799159459541713 | 0.1440094940115344 |
| 0.6147462779815456 | 0.1651585541672134 | 0.3454337493352710 |
| 0.5791619530191525 | 0.0940977343231424 | 0.4139981860261344 |
| 0.5690329405911143 | 0.0370315702559338 | 0.2947851878339236 |
| 0.5960236020194145 | 0.0527429631308820 | 0.0985889376859319 |
| 0.6301608635273723 | 0.1218898728889997 | 0.0251324827447732 |
| 0.6251075613762680 | 0.2203716608404136 | 0.4933041078491840 |
| 0.5400682630962663 | 0.3603098156636335 | 0.8106963926600557 |
| 0.5501956314050105 | 0.3851570463199323 | 0.0121028865440991 |
| 0.5148444817858362 | 0.4208148731707553 | 0.0806104648493857 |
| 0.4679789787509563 | 0.4310068963990688 | 0.9613427161535242 |
| 0.4566400827198862 | 0.4040016717129475 | 0.7651632319860084 |
| 0.4915246564177025 | 0.3697876840713903 | 0.6917628150550925 |
| 0.5949953742707095 | 0.3747488396720584 | 0.1600070855699300 |
| 0.4740734222315623 | 0.9150665407638883 | 0.1004182622000229 |
| 0.5816416783104188 | 0.9907048303982080 | 0.6634176219530872 |
| 0.5181068330774892 | 0.8667492596837576 | 0.7932766915603224 |
| 0.0848932244018883 | 0.5588603403669623 | 0.4335499910414242 |
| 0.0094653430514384 | 0.5909535364300922 | 0.9965366410268217 |
| 0.1333910696466631 | 0.6511667614597627 | 0.1265505755004455 |
| 0.4411165454074890 | 0.5259871168843233 | 0.7669427572757215 |
| 0.4091109245472992 | 0.4184775618084586 | 0.3300050713017413 |
| 0.3487751189022177 | 0.4819731677064993 | 0.4599087606173740 |
| 0.9150665407638883 | 0.4740734222315623 | 0.8995817227999723 |
| 0.9907048303982080 | 0.5816416783104188 | 0.3365823780469128 |
| 0.8667492596837576 | 0.5181068330774892 | 0.2067233084396776 |
| 0.5588603403669623 | 0.0848932244018883 | 0.5664500089585758 |
| 0.5909535364300922 | 0.0094653430514384 | 0.0034633379731801 |
| 0.6511667614597627 | 0.1333910696466631 | 0.8734494544995570 |
| 0.5259871168843233 | 0.4411165454074890 | 0.2330572127242760 |
| 0.4184775618084586 | 0.4091109245472992 | 0.6699948996982599 |
| 0.4819731677064993 | 0.3487751189022177 | 0.5400912093826236 |



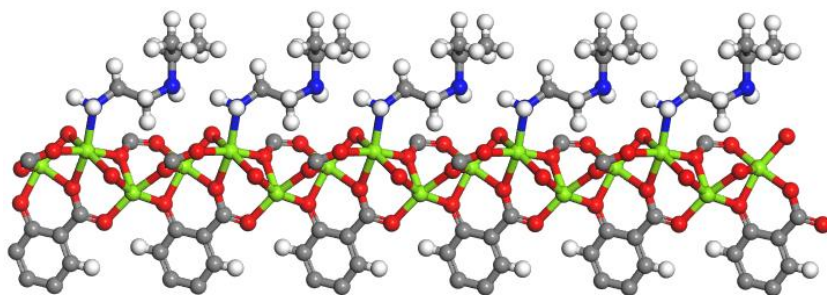

i-2-Mg<sub>2</sub>(dobpdc)

1.0000000000000000

21.0062553987785599 -0.1459282491276137 0.0178073558570628

-11.2437367390438840 19.0210025786134587 0.0105314602782429

0.0049686186352121 -0.0290300248399805 6.8274343128477168

Mg O C H N

6 18 47 32 2

Direct

0.3392887841499643 0.7356093179438830 0.8054270321141459

0.2740537172414790 0.6437600246457578 0.1459807899356349

0.3858459254378133 0.6803997819662513 0.4630788872939817

0.6984716121892589 0.3536893627257527 0.1968250404261909

0.5986234553319392 0.2882079522733250 0.8632274625381555

0.6311525521784134 0.3824681329724342 0.5306248702142895

0.4222971933936250 0.7766491997973688 0.6092506681538552

0.3660360117758543 0.7329187185791497 0.2433750793262348

0.3949041333971479 0.8128086732343291 0.0094379933577855

0.2401816856952266 0.6888050109912811 0.9425812728541985

0.2834840921286954 0.6731557707569849 0.5733729927426126

0.1952412549611182 0.6177993430768893 0.3476409607298194

0.3241316495300595 0.5968547024773514 0.2732215345120608

0.3376662236016443 0.6487739137050568 0.9124888393654516

0.3893070144717257 0.6176829388259719 0.6788790596745997

0.7322166724568930 0.4317213285919834 0.3981464776189583

0.6903488133787903 0.3768211112872351 0.7607642299571893

0.7765567224975456 0.4062379180560569 0.9909394099563258

0.6477729119502555 0.2576014785080076 0.0631779348324741

0.6314405064478095 0.2961327124950870 0.4264671726825355

0.5752378151375623 0.2139148719675390 0.6562983277872192

0.5481643286039102 0.3350864889217959 0.7306547948133897

0.6058747803218765 0.3509109144982148 0.0945169463315025

0.5783546232954038 0.4056475269295774 0.3242411854811849

0.4559303375735411 0.8410204131598178 0.5288112331951922

0.4485148477572380 0.8541066370262271 0.3269323279859577

0.4843465867694192 0.9237960654895261 0.2572895493878349

0.5288293826208275 0.9820148764887549 0.3758078987125799

0.5373315183509462 0.9685597900463847 0.5729596853065573

0.5020702719110091 0.9006146029386670 0.6470953726803117

|                    |                    |                    |
|--------------------|--------------------|--------------------|
| 0.4009229907820782 | 0.7976957130515245 | 0.1855830377549950 |
| 0.1723163288015073 | 0.6583535715187381 | 0.8612386440541826 |
| 0.1572732198269904 | 0.6349350281469199 | 0.6619454839622136 |
| 0.0838229835770221 | 0.6011082811797053 | 0.5925324113147354 |
| 0.0244270634056534 | 0.5902457422811409 | 0.7094139475023553 |
| 0.0403585955872998 | 0.6155439480921174 | 0.9037618342225215 |
| 0.1119739306495404 | 0.6486210055208019 | 0.9775801885797577 |
| 0.2146660658449520 | 0.6419537814456575 | 0.5210086654575292 |
| 0.3460788909916275 | 0.5556916154297937 | 0.1908475480750127 |
| 0.3648137903023283 | 0.5588773727514749 | 0.9875856360437112 |
| 0.3926555965926752 | 0.5172761653055673 | 0.9162507132960016 |
| 0.4010788083546188 | 0.4707410762958162 | 0.0350972699280803 |
| 0.3791782483144246 | 0.4656119014921956 | 0.2329902916306139 |
| 0.3526283045726757 | 0.5066006025997254 | 0.3088222201342674 |
| 0.3635766290056637 | 0.6100528931012335 | 0.8507108272810200 |
| 0.5492944565997959 | 0.7595324616142634 | 0.2441288393857803 |
| 0.5222428821336038 | 0.7232781370224473 | 0.0427485739224451 |
| 0.7999983197748364 | 0.4700990660421098 | 0.4795856237947191 |
| 0.8157340691408805 | 0.4631088571718252 | 0.6794707436214082 |
| 0.8889513259692947 | 0.5032400724677970 | 0.7498054883801260 |
| 0.9476397355825554 | 0.5513547057721695 | 0.6330004382130383 |
| 0.9309926880866470 | 0.5594057798210343 | 0.4381300305532108 |
| 0.8596064453807841 | 0.5201713129676548 | 0.3634609919731275 |
| 0.7589273968615302 | 0.4131651316866680 | 0.8177457030538875 |
| 0.6217106673759147 | 0.1938607180940437 | 0.1449677828703742 |
| 0.5979789915644034 | 0.1782263344334609 | 0.3448070942401813 |
| 0.5684068696261235 | 0.1091274748373934 | 0.4151737634787906 |
| 0.5628878326648632 | 0.0546251479381610 | 0.2990776953228007 |
| 0.5889100591365519 | 0.0713105768040307 | 0.1046021874116647 |
| 0.6172021593495174 | 0.1385554202881778 | 0.0294482678167967 |
| 0.6009644214828000 | 0.2312215359616161 | 0.4833954089873771 |
| 0.5115162788521488 | 0.3641469523920549 | 0.8110856927591215 |
| 0.5206778553057276 | 0.3877772924146967 | 0.0102334137670397 |
| 0.4832914132787565 | 0.4213075327790676 | 0.0780045253547783 |
| 0.4355276450486727 | 0.4314343131894702 | 0.9600215618895334 |
| 0.4243768678922706 | 0.4051237743718445 | 0.7666415903688559 |
| 0.4610894470468949 | 0.3725992888952234 | 0.6942311702239721 |
| 0.5705034345865272 | 0.3816612249553373 | 0.1505151197682224 |
| 0.6372629796293126 | 0.8137926189851470 | 0.8675362908225281 |
| 0.6736969831094299 | 0.7691805479148286 | 0.8584983953257606 |
| 0.6608200945694023 | 0.8644669692329714 | 0.6939958839910858 |
| 0.5045632219474001 | 0.6665563726989987 | 0.3989348053880022 |
| 0.4740398543338742 | 0.9310351178485377 | 0.1051238039229716 |
| 0.5729936806543421 | 0.0128271327670149 | 0.6692803494856108 |
| 0.5081583301029937 | 0.8914683202583404 | 0.8011839856782572 |
| 0.0743900650266198 | 0.5815113573511894 | 0.4422337511176124 |

|                    |                    |                    |
|--------------------|--------------------|--------------------|
| 0.9953206076557350 | 0.6096004540180218 | 0.9975634969641050 |
| 0.1237462047973779 | 0.6679799903437740 | 0.1282308234015801 |
| 0.4103315276442103 | 0.5247089584505602 | 0.7634916200694519 |
| 0.3829235528780401 | 0.4279585101322354 | 0.3282536343879414 |
| 0.3362018644333347 | 0.5025006681573458 | 0.4622082953364668 |
| 0.5317559397348290 | 0.7975392530533796 | 0.8481973915018486 |
| 0.5454437099498151 | 0.8073357946345965 | 0.2499388575388508 |
| 0.6081701727198521 | 0.7764692464694463 | 0.2643904307069462 |
| 0.4623785159896627 | 0.7022794278644042 | 0.0348175930289045 |
| 0.5298970812906134 | 0.6776020431568526 | 0.0345278032906862 |
| 0.8988357996628977 | 0.4939178154952515 | 0.9004399105555905 |
| 0.9754748294368341 | 0.5980298455730235 | 0.3443075974741774 |
| 0.8476312499518173 | 0.5268988082078891 | 0.2122889992308501 |
| 0.5479190347382428 | 0.0990476591131682 | 0.5655189773706795 |
| 0.5874274073083825 | 0.0302993111597800 | 0.0115077244329314 |
| 0.6370798446117476 | 0.1507225287342635 | 0.8786813536377167 |
| 0.4948147177547071 | 0.4413245270227009 | 0.2279200460391948 |
| 0.3853011807549152 | 0.4099182531407592 | 0.6721376156216294 |
| 0.4520678410426555 | 0.3527660476921994 | 0.5440853425143501 |
| 0.5261734846448860 | 0.7339312718897162 | 0.5418083424789231 |
| 0.6573200909475716 | 0.8468530063865103 | 0.0020560363159419 |
| 0.6554714218685120 | 0.7358945646301791 | 0.7261728252306625 |
| 0.6595926976085096 | 0.7344038187401409 | 0.9861467620827895 |
| 0.7344560888046345 | 0.8033172351570101 | 0.8541615856706883 |
| 0.6498457353958855 | 0.8359907178948447 | 0.5541121108277522 |
| 0.7205986876555244 | 0.9033508546740876 | 0.7013908390855050 |
| 0.6311349126439580 | 0.8934214618104335 | 0.6922831141699817 |
| 0.5033568362232756 | 0.7123728130612577 | 0.4048482919899783 |
| 0.5554858095709392 | 0.7675553837695190 | 0.8683098119495440 |

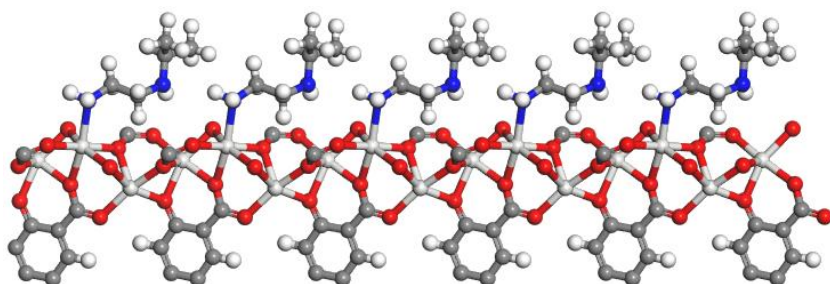

i-2-Sc<sub>2</sub>(dobpdc)

1.0000000000000000

|                      |                     |                     |
|----------------------|---------------------|---------------------|
| 21.6988365957145390  | -0.1767306199788978 | 0.0273781114225855  |
| -11.6571695224530103 | 19.1332185307021057 | -0.0274687746568196 |
| 0.0058935342597025   | -0.0494347836806653 | 7.2577129738596922  |

| Sc | O | C | H | N |
|----|---|---|---|---|
|----|---|---|---|---|

|   |    |    |    |   |
|---|----|----|----|---|
| 6 | 18 | 47 | 32 | 2 |
|---|----|----|----|---|

Direct

|                    |                    |                    |
|--------------------|--------------------|--------------------|
| 0.3441712415681621 | 0.7387429136322865 | 0.8037186239151950 |
| 0.2675444857518983 | 0.6397527175444750 | 0.1432162023500112 |

|                    |                    |                    |
|--------------------|--------------------|--------------------|
| 0.3802339780532762 | 0.6742910374311819 | 0.4732670523230880 |
| 0.7040435940309422 | 0.3614735451380966 | 0.1808171373270469 |
| 0.5985365247809824 | 0.2864643709729577 | 0.8463734167970145 |
| 0.6303062506399826 | 0.3877478524610751 | 0.5157012372807372 |
| 0.4284412787997312 | 0.7798981630380055 | 0.5921443376274169 |
| 0.3760841933583734 | 0.7323524761264650 | 0.2410175679652795 |
| 0.4120471650069035 | 0.8125203730550083 | 0.0171138480455326 |
| 0.2347244212215003 | 0.6876652188230423 | 0.9256672777996400 |
| 0.2780474780734821 | 0.6772258904146327 | 0.5673299972718269 |
| 0.1895071601432576 | 0.6216943088792775 | 0.3592186777436055 |
| 0.3220349396744950 | 0.5887026824048434 | 0.2625348780442351 |
| 0.3266996573249585 | 0.6351579384444221 | 0.9065771912168969 |
| 0.3808801982319991 | 0.6067187363776654 | 0.6915833868079204 |
| 0.7412837505912222 | 0.4434757030963752 | 0.3978565113195245 |
| 0.6953495830522911 | 0.3924729876400903 | 0.7507676120619422 |
| 0.7811484936026787 | 0.4239007342931131 | 0.9652525160120788 |
| 0.6479348765743467 | 0.2538919151895698 | 0.0596188466487675 |
| 0.6414199818373731 | 0.2968223164700561 | 0.4144070224587040 |
| 0.5854221995291553 | 0.2131651740870097 | 0.6265257432632652 |
| 0.5445409819350573 | 0.3390748931711585 | 0.7289115326304199 |
| 0.5959886155513203 | 0.3459128060596370 | 0.0828737813621387 |
| 0.5697868733042810 | 0.4013839680934765 | 0.2971533416209766 |
| 0.4624381476986485 | 0.8442988540073770 | 0.5135702829130580 |
| 0.4577042027873546 | 0.8544520108691813 | 0.3198680483193641 |
| 0.4943682318161393 | 0.9242934345132809 | 0.2533874173021928 |
| 0.5348993604001606 | 0.9828833446721390 | 0.3657749809155106 |
| 0.5398056212308049 | 0.9713875592013750 | 0.5553282530556913 |
| 0.5039638226095349 | 0.9037502754108289 | 0.6263130466435030 |
| 0.4144765508043449 | 0.7986921610290736 | 0.1887095148234863 |
| 0.1690481282720597 | 0.6594796699232077 | 0.8467037331187228 |
| 0.1550819407462285 | 0.6395201350897182 | 0.6559727050005932 |
| 0.0832034713831575 | 0.6079607719826114 | 0.5900807611590437 |
| 0.0253940016168457 | 0.5960717960277151 | 0.7005070769509558 |
| 0.0406694863375705 | 0.6176545182769715 | 0.8871476282760469 |
| 0.1102574234027074 | 0.6481765774293322 | 0.9575954934185305 |
| 0.2092499407552140 | 0.6461870886392376 | 0.5228482403408847 |
| 0.3469348777863743 | 0.5512466342418847 | 0.1816183221823024 |
| 0.3621958775131517 | 0.5536870638818954 | 0.9875965721928850 |
| 0.3912220909860054 | 0.5142013175792641 | 0.9202797758746541 |
| 0.4047489664718995 | 0.4720703220594231 | 0.0315519175172696 |
| 0.3881199538732218 | 0.4694298025747798 | 0.2211868740025977 |
| 0.3606298025499441 | 0.5081905202245807 | 0.2933633638424595 |
| 0.3562448605519322 | 0.5995038732258635 | 0.8559754840786837 |
| 0.5457976135870695 | 0.7518531023132695 | 0.2681040537900046 |
| 0.5171926233563866 | 0.7159057461269356 | 0.0786854831483268 |
| 0.8070993520477714 | 0.4806866783129138 | 0.4773552947969861 |

|                    |                    |                    |
|--------------------|--------------------|--------------------|
| 0.8198418493666324 | 0.4755748525364467 | 0.6690595323784407 |
| 0.8918435493903729 | 0.5150274973007356 | 0.7360096702774683 |
| 0.9507760236026357 | 0.5593301548037886 | 0.6256482533892864 |
| 0.9367406803229770 | 0.5650438087199063 | 0.4382097678854890 |
| 0.8670939570933385 | 0.5267105869621886 | 0.3667653433691314 |
| 0.7639702475869399 | 0.4293276053313946 | 0.7999717233941794 |
| 0.6234353117335516 | 0.1913821666823239 | 0.1396931364475549 |
| 0.6049775322452149 | 0.1783583772013344 | 0.3314999479342617 |
| 0.5768849368563451 | 0.1097544885765771 | 0.3990750301846546 |
| 0.5678223675027994 | 0.0544245902927969 | 0.2898158880710824 |
| 0.5882966513745203 | 0.0689254079579129 | 0.1023677100892471 |
| 0.6147487926540407 | 0.1351169414277322 | 0.0299117163316538 |
| 0.6103948674917206 | 0.2307659868309031 | 0.4626348510079552 |
| 0.5101443545189710 | 0.3680135249965204 | 0.8080382407864661 |
| 0.5173860048141634 | 0.3872192180750034 | 0.9996086286016777 |
| 0.4814337269370697 | 0.4203978983139791 | 0.0658115444999368 |
| 0.4381277921764593 | 0.4342245208492557 | 0.9555930052682697 |
| 0.4298964319445844 | 0.4129224858457619 | 0.7684672356162849 |
| 0.4651000068010518 | 0.3811505499014700 | 0.6974231646323688 |
| 0.5623383288821628 | 0.3780133675459538 | 0.1315186319720354 |
| 0.6268206027045267 | 0.8056731392174967 | 0.9029535788210268 |
| 0.6598844113285125 | 0.7603016394611757 | 0.8817955672486448 |
| 0.6465083648765670 | 0.8554238112774115 | 0.7400739672000185 |
| 0.5034173125637338 | 0.6588637189761641 | 0.4126713196182337 |
| 0.4869563331164031 | 0.9306926897714334 | 0.1079822041795850 |
| 0.5722099455513856 | 0.0159287337097709 | 0.6475546848054279 |
| 0.5069003949607520 | 0.8953113471201490 | 0.7734043977787408 |
| 0.0738335476392820 | 0.5907169130481833 | 0.4465928816567555 |
| 0.9971030489301853 | 0.6108530984147365 | 0.9773093988529169 |
| 0.1215405519010773 | 0.6647051722275563 | 0.1018796790028489 |
| 0.4051958142092644 | 0.5198463556721080 | 0.7744819438497146 |
| 0.3960954659633416 | 0.4355953268529973 | 0.3126089730655153 |
| 0.3480454035164300 | 0.5058043190683321 | 0.4400194697242483 |
| 0.5257367496998384 | 0.7921823376924095 | 0.9087531278921830 |
| 0.5416689408642696 | 0.7986627929163461 | 0.2780349118979757 |
| 0.6035033826469416 | 0.7695984186786333 | 0.2835334509069867 |
| 0.4583041183406920 | 0.6929766835891371 | 0.0761771153512925 |
| 0.5255409027749565 | 0.6716362998612055 | 0.0647521450641833 |
| 0.9001253551366233 | 0.5075838503766121 | 0.8800445281476641 |
| 0.9814004663628211 | 0.6006904338736589 | 0.3483190091692023 |
| 0.8567649222579448 | 0.5312433333464810 | 0.2218202544628909 |
| 0.5603206380031764 | 0.1009889182815158 | 0.5431444114555006 |
| 0.5838119545381346 | 0.0274084074556029 | 0.0129046833657895 |
| 0.6301475182928087 | 0.1456590224419045 | 0.8849217301238355 |
| 0.4907770305767585 | 0.4369916770845208 | 0.2098087874493686 |
| 0.3945174155352476 | 0.4207063918490164 | 0.6783991546855006 |

|                    |                    |                    |
|--------------------|--------------------|--------------------|
| 0.4584484212830304 | 0.3650186693822022 | 0.5527840652229230 |
| 0.5252165097896508 | 0.7262265400233829 | 0.5475105389223387 |
| 0.6506779324759364 | 0.8389777622258947 | 0.0281284881782184 |
| 0.6376243184061821 | 0.7264047151239978 | 0.7588327140473012 |
| 0.6488582378659231 | 0.7263160543094358 | 0.0014253452677551 |
| 0.7190524806069902 | 0.7936271655061091 | 0.8669185228010790 |
| 0.6303963402070352 | 0.8262584629878091 | 0.6086513465466368 |
| 0.7053273480761035 | 0.8931309990486085 | 0.7358859100435851 |
| 0.6196364004704762 | 0.8854460643398241 | 0.7486991327073440 |
| 0.5024039041868988 | 0.7040747932612703 | 0.4206495282528167 |
| 0.5470100208221993 | 0.7609380289181118 | 0.9160279015393016 |

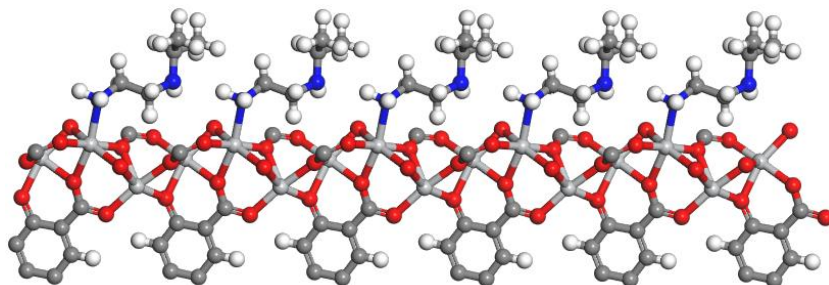

i-2-Ti<sub>2</sub>(dobpdc)

1.0000000000000000

21.3009298371575291 -0.2230889281946649 0.0473905141167316

-11.4808450361002325 19.0359035766728155 -0.0377076633968811

0.0095692689850782 -0.0413979277909560 7.0536499175338232

Ti O C H N

6 18 47 32 2

Direct

|                    |                    |                    |
|--------------------|--------------------|--------------------|
| 0.3433730527526606 | 0.7384796677093490 | 0.8068365977271696 |
| 0.2697800555061320 | 0.6408879353823451 | 0.1460197171772251 |
| 0.3826328342007059 | 0.6769933234004526 | 0.4741418471367425 |
| 0.7024832478827392 | 0.3592923174716560 | 0.1828062653902904 |
| 0.5964506772588507 | 0.2856145344298611 | 0.8483877068036421 |
| 0.6285396634265297 | 0.3863481685366636 | 0.5171902861672208 |
| 0.4267269524649038 | 0.7798304539541903 | 0.6021747079927593 |
| 0.3724772371718998 | 0.7325635438643943 | 0.2467254229082130 |
| 0.3998782888361845 | 0.8125930099232832 | 0.0199627535810407 |
| 0.2369086624423957 | 0.6859602858910492 | 0.9369686342982888 |
| 0.2800164110648140 | 0.6689798178468322 | 0.5817336526586345 |
| 0.1937175659759092 | 0.6213638032932920 | 0.3561966621783199 |
| 0.3228603226738969 | 0.5922429652174941 | 0.2703378552425946 |
| 0.3353897056545634 | 0.6444635621441890 | 0.9157720423157585 |
| 0.3877824812538009 | 0.6143240846873752 | 0.6904854637177920 |
| 0.7367403892860267 | 0.4391963139905144 | 0.3905554796057373 |
| 0.6916587006999535 | 0.3825070359532319 | 0.7431739731614329 |
| 0.7774983181226887 | 0.4123477801051720 | 0.9663722843256153 |
| 0.6467046284560212 | 0.2558021254708720 | 0.0535742522422993 |
| 0.6327694969920259 | 0.2970877981049114 | 0.4082062384303455 |

|                    |                    |                    |
|--------------------|--------------------|--------------------|
| 0.5763386803821717 | 0.2141967755983316 | 0.6302010356266408 |
| 0.5443326879667367 | 0.3368305803115490 | 0.7226258459055046 |
| 0.6028654116715657 | 0.3513732301168133 | 0.0764310945242954 |
| 0.5762462665401742 | 0.4062568215473021 | 0.3001338500871071 |
| 0.4615667973309812 | 0.8444694765029794 | 0.5217135463877298 |
| 0.4547668882913101 | 0.8551031749740261 | 0.3242974496550133 |
| 0.4916071784726412 | 0.9249387315172655 | 0.2551685595554289 |
| 0.5348083881126584 | 0.9838526829035601 | 0.3695348919181995 |
| 0.5418330637205173 | 0.9720737596653777 | 0.5628888880288301 |
| 0.5058935452668010 | 0.9042360819005282 | 0.6364804453160460 |
| 0.4077335929339085 | 0.7983766623055502 | 0.1921162123330689 |
| 0.1698204804397250 | 0.6579230740010260 | 0.8560183575281712 |
| 0.1562094391928213 | 0.6376782426889207 | 0.6604056588927989 |
| 0.0836277480112955 | 0.6070448530157009 | 0.5907243411300556 |
| 0.0248928126869927 | 0.5960005052493500 | 0.7039406963188952 |
| 0.0399457769867340 | 0.6178608425759933 | 0.8956311957266365 |
| 0.1105306415421552 | 0.6480580596235868 | 0.9693775886884737 |
| 0.2120380533217414 | 0.6429142992714532 | 0.5283208728885000 |
| 0.3457492172803924 | 0.5524198517065955 | 0.1872754222420028 |
| 0.3630598724567164 | 0.5559333487281179 | 0.9893494779699026 |
| 0.3901874771327343 | 0.5144287722201355 | 0.9189400282226146 |
| 0.3999164153799910 | 0.4690473380893465 | 0.0328019125612400 |
| 0.3806948399415333 | 0.4648921226774263 | 0.2263547234811512 |
| 0.3545876503755920 | 0.5054715082938941 | 0.3012092544803480 |
| 0.3614346919498956 | 0.6059572138349765 | 0.8580304456395424 |
| 0.5481571219607915 | 0.7544083060691236 | 0.2642641044566645 |
| 0.5200304219860499 | 0.7184233758752612 | 0.0690437058277169 |
| 0.8037140693439184 | 0.4777401571287925 | 0.4731127408447193 |
| 0.8170678070660315 | 0.4702023288479964 | 0.6677253945299100 |
| 0.8897182558685799 | 0.5108679405671168 | 0.7381971720869487 |
| 0.9490573983359667 | 0.5586604859993685 | 0.6268438463293080 |
| 0.9343478186016512 | 0.5666867512909874 | 0.4365615405597367 |
| 0.8636911494180595 | 0.5273277657213811 | 0.3620087141527080 |
| 0.7602508081336481 | 0.4199035171786534 | 0.7974672257557387 |
| 0.6225026329849896 | 0.1928192329377652 | 0.1365343235709133 |
| 0.6009055965724102 | 0.1791416650944200 | 0.3316261690625311 |
| 0.5735805477439371 | 0.1106069600958079 | 0.4025780369659557 |
| 0.5679456801475808 | 0.0558606406494633 | 0.2917987970144083 |
| 0.5914655635535482 | 0.0710596724042318 | 0.1011519088461199 |
| 0.6177479155842533 | 0.1375481160198291 | 0.0257357270666390 |
| 0.6030111199841244 | 0.2317196286204748 | 0.4618155216936941 |
| 0.5082985980615149 | 0.3652884036578854 | 0.8044344717541136 |
| 0.5177729379456011 | 0.3871705304618018 | 0.9989931719412866 |
| 0.4802900900075073 | 0.4195095017788546 | 0.0679733510088099 |
| 0.4335490296344418 | 0.4303979993161704 | 0.9557505718408308 |
| 0.4231081510842998 | 0.4064063252480281 | 0.7657663984865266 |

|                    |                    |                    |
|--------------------|--------------------|--------------------|
| 0.4595136239589692 | 0.3748412107851351 | 0.6924455626971948 |
| 0.5673001545313525 | 0.3814625684540189 | 0.1303552957647938 |
| 0.6336399964814206 | 0.8082105677245437 | 0.8936784919295704 |
| 0.6673317600812467 | 0.7623023744017559 | 0.8771066238558447 |
| 0.6558495665170696 | 0.8587059796818508 | 0.7261410641741293 |
| 0.5036085924392921 | 0.6609280753173579 | 0.4127892814277772 |
| 0.4823164307805641 | 0.9315664287901768 | 0.1069574901683907 |
| 0.5761927304834131 | 0.0170044445938018 | 0.6560951613953350 |
| 0.5103401708899540 | 0.8956744692398857 | 0.7869193081957633 |
| 0.0741562392713746 | 0.5892356444439244 | 0.4434745628648216 |
| 0.9953785541952129 | 0.6113607160308732 | 0.9871795432155324 |
| 0.1219745736253870 | 0.6648178278276831 | 0.1176134198390599 |
| 0.4066270185600658 | 0.5213824261157214 | 0.7703026499671495 |
| 0.3859728932797282 | 0.4286002069441963 | 0.3187590691257185 |
| 0.3401149556929397 | 0.5022973035067082 | 0.4510211555268882 |
| 0.5304259261808468 | 0.7943262673381781 | 0.8874709417713120 |
| 0.5445545864730832 | 0.8019657183666311 | 0.2728420110310097 |
| 0.6066371060985887 | 0.7716082953304948 | 0.2820895262250218 |
| 0.4604946842101825 | 0.6969706889636100 | 0.0639429648503054 |
| 0.5272207571292213 | 0.6729233337148486 | 0.0576269240165601 |
| 0.8986825671658423 | 0.5015515591837811 | 0.8843586044957306 |
| 0.9793713012726002 | 0.6049149663735278 | 0.3466156656185007 |
| 0.8527485940191752 | 0.5336425518894501 | 0.2146656997895633 |
| 0.5543489208075556 | 0.1010145610299205 | 0.5490352371331966 |
| 0.5894958995103607 | 0.0298371810761537 | 0.0115724145941485 |
| 0.6357264013400794 | 0.1489343991385681 | 0.8782179583937548 |
| 0.4914524535353877 | 0.4385010604197106 | 0.2141644179153062 |
| 0.3851814501783863 | 0.4121682735305896 | 0.6750579127799057 |
| 0.4512764958907596 | 0.3565721440438736 | 0.5453553657928296 |
| 0.5255571174558753 | 0.7284799410909315 | 0.5515267526562369 |
| 0.6563347833794424 | 0.8414044503906339 | 0.0234074795550470 |
| 0.6462664959596154 | 0.7285856926387098 | 0.7496365375182421 |
| 0.6542798926021902 | 0.7277050975889594 | 0.0003333386195479 |
| 0.7277198540245493 | 0.7956022217610439 | 0.8667333867384315 |
| 0.6410569939822821 | 0.8296861121960148 | 0.5905637282191947 |
| 0.7157403320231950 | 0.8964687254497790 | 0.7261662543803169 |
| 0.6285775114662897 | 0.8891575686820232 | 0.7315818322115319 |
| 0.5028557212609783 | 0.7066460749610499 | 0.4198610634736042 |
| 0.5523480607160067 | 0.7632171273234931 | 0.9011087251080525 |



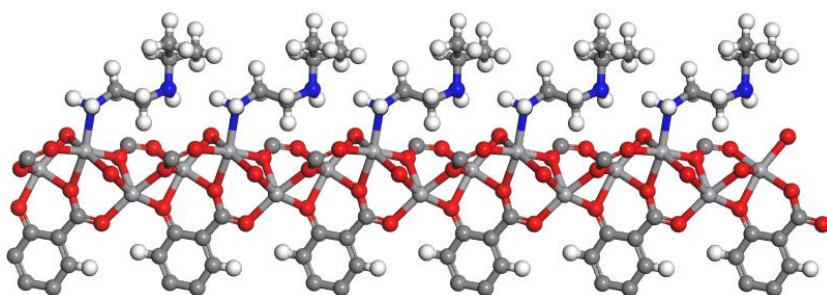

i-2-V<sub>2</sub>(dobpdc)

1.00000000000000

21.0876498780179382 -0.2332841794737050 0.0272613898548363

-11.3695171339373182 19.1340945475726976 0.0088696999957481

0.0050599134656289 -0.0308711869169205 7.0126023301972804

V O C H N

6 18 47 32 2

Direct

0.3412853975202736 0.7399688048013431 0.8067448605767211

0.2724953035993281 0.6414305038214749 0.1446726518247701

0.3863990734091445 0.6809430050155427 0.4702781452677200

0.7002333918873163 0.3540873410644636 0.1875433670083311

0.5932293171143712 0.2850371283862003 0.8534353588888095

0.6297901709819484 0.3856336495490140 0.5213288812399810

0.4318548918918310 0.7809837618414193 0.6106711876843747

0.3714136493371001 0.7342262655522163 0.2442220115088745

0.4003912060826096 0.8157050086790676 0.0217330541135397

0.2377838936362622 0.6914648922806634 0.9439116401269771

0.2834176804481245 0.6753516904168038 0.5757977754039558

0.1943119194690581 0.6213370243988692 0.3581399750489211

0.3230034028529829 0.5926532630208783 0.2760540593894447

0.3379391601719419 0.6482349114372425 0.9117305846893160

0.3892516444025773 0.6152595160882584 0.6887119974852283

0.7341973863272031 0.4388329581782173 0.3870076645067044

0.6889084772191154 0.3798112541508942 0.7520996798567623

0.7772509432760586 0.4112114009668915 0.9709605791661104

0.6496134777140128 0.2552736925032733 0.0516857837163371

0.6330057234749518 0.2965328021105904 0.4179455317504264

0.5758574860234873 0.2122938321988030 0.6358080041366563

0.5392338924575455 0.3309368691192347 0.7189695744953823

0.6011328064948742 0.3477642798202112 0.0854942793630329

0.5727583961176919 0.4030911998546145 0.3033584823404851

0.4624586864671016 0.8442293952728832 0.5277471304848831

0.4544828251617190 0.8555450067453023 0.3299360773004807

0.4895820576025756 0.9248450294177033 0.2606461691131159

0.5325546931664960 0.9838871294445610 0.3743247927344626

0.5401860776463678 0.9720540313188621 0.5682539225510439

0.5062044295064965 0.9046824325937024 0.6420923661611724

|                    |                    |                    |
|--------------------|--------------------|--------------------|
| 0.4067136822576387 | 0.7994731820114396 | 0.1916398078720007 |
| 0.1708533961749978 | 0.6604137957173251 | 0.8599232068167026 |
| 0.1573093891238244 | 0.6388496936582015 | 0.6639891819561683 |
| 0.0841204649970635 | 0.6056392524197491 | 0.5941964028579889 |
| 0.0238325990949804 | 0.5930218858266301 | 0.7063300013131268 |
| 0.0383006205026817 | 0.6155445929413332 | 0.8981811393059900 |
| 0.1094558218208590 | 0.6482138026108899 | 0.9723628814215388 |
| 0.2142202761302201 | 0.6453098181601860 | 0.5266115904336530 |
| 0.3463119682101947 | 0.5539901099117230 | 0.1894868169628481 |
| 0.3635227696848276 | 0.5576482039637654 | 0.9900668454541304 |
| 0.3905567113237112 | 0.5160945962823291 | 0.9180303489924313 |
| 0.4005671743153201 | 0.4703424138373364 | 0.0310540374415140 |
| 0.3816618895408226 | 0.4660849683827308 | 0.2260485085803907 |
| 0.3555614232766970 | 0.5065202926264902 | 0.3025589616309361 |
| 0.3631464435256788 | 0.6086824650543647 | 0.8549704120418156 |
| 0.5493929662480213 | 0.7552021636487680 | 0.2576229701928838 |
| 0.5221179749710814 | 0.7185978480149444 | 0.0620120243923239 |
| 0.8009771704171129 | 0.4750462045905124 | 0.4720220383412865 |
| 0.8147169567517523 | 0.4675009514716635 | 0.6680968704944945 |
| 0.8877472932901824 | 0.5074700286428069 | 0.7388333539023080 |
| 0.9477711906561481 | 0.5549009395765339 | 0.6274281271576001 |
| 0.9330678060622546 | 0.5625948569963555 | 0.4356109243104314 |
| 0.8620981321429895 | 0.5239983739394987 | 0.3605736441798157 |
| 0.7581749500074437 | 0.4173307079053146 | 0.8036981119624969 |
| 0.6231425025327368 | 0.1928385917287088 | 0.1374357354083386 |
| 0.6009939812337208 | 0.1790487349086121 | 0.3337704750494979 |
| 0.5723293541608641 | 0.1106344363111376 | 0.4052517890293359 |
| 0.5655818606470078 | 0.0554199224949983 | 0.2948975616029230 |
| 0.5890853213422957 | 0.0702813950686334 | 0.1031038156936361 |
| 0.6166987290204418 | 0.1366281501437356 | 0.0269201251963480 |
| 0.6028399898736367 | 0.2311846144130243 | 0.4692439860196558 |
| 0.5060079594508267 | 0.3619789879974675 | 0.8023541825392684 |
| 0.5159992392151906 | 0.3844601487961654 | 0.9975907451018813 |
| 0.4799011329248799 | 0.4185840491151609 | 0.0654227200554445 |
| 0.4336391536169302 | 0.4310545197399236 | 0.9527644378521387 |
| 0.4228008924752373 | 0.4069918053505148 | 0.7622083857503483 |
| 0.4578178403741546 | 0.3736635813865590 | 0.6896707278833532 |
| 0.5653764059199489 | 0.3784148906764813 | 0.1355972512346852 |
| 0.6351167899894250 | 0.8105034795416799 | 0.8868459204377075 |
| 0.6737015100839230 | 0.7683476309513182 | 0.8790542346690629 |
| 0.6561518324890230 | 0.8593785003316583 | 0.7149101897350789 |
| 0.5038273290298108 | 0.6617177816410234 | 0.4064299314955377 |
| 0.4795167046755466 | 0.9311040115890989 | 0.1117135248656638 |
| 0.5741516555453501 | 0.0168436486637162 | 0.6619646272374453 |
| 0.5118465951546369 | 0.8962979470643617 | 0.7929722320572168 |
| 0.0755068473832594 | 0.5875503313076749 | 0.4465999715560471 |

|                    |                    |                    |
|--------------------|--------------------|--------------------|
| 0.9926777416667747 | 0.6078997328605453 | 0.9895487598632471 |
| 0.1203872632904748 | 0.6657087634608700 | 0.1207296749153102 |
| 0.4066795795345044 | 0.5232060602145197 | 0.7681622110567972 |
| 0.3870657382033329 | 0.4295535840893834 | 0.3182335416885209 |
| 0.3410966376703826 | 0.5031192265016813 | 0.4533712759065196 |
| 0.5281725928579988 | 0.7901842000796506 | 0.8687057010751289 |
| 0.5448458838084775 | 0.8022448796510702 | 0.2638678077073493 |
| 0.6084357347499392 | 0.7729582339335366 | 0.2772441772332854 |
| 0.4619988361813085 | 0.6962168407529532 | 0.0564021325013968 |
| 0.5309118190057731 | 0.6739659048920856 | 0.0540693385527433 |
| 0.8964962411879398 | 0.4982273838366567 | 0.8863340610402304 |
| 0.9784765280617691 | 0.6003541888465875 | 0.3448178985536643 |
| 0.8511857835781527 | 0.5303618163208910 | 0.2121743174119928 |
| 0.5531693951367913 | 0.1015513305810103 | 0.5527421243413642 |
| 0.5863363500099226 | 0.0288033537727017 | 0.0132135721287128 |
| 0.6349263925559612 | 0.1477497721983312 | 0.8786088201973641 |
| 0.4915441059597825 | 0.4374962098021058 | 0.2122184268217211 |
| 0.3853530013463384 | 0.4139579440304786 | 0.6703085723751698 |
| 0.4490342579768125 | 0.3552140465164655 | 0.5421419150439419 |
| 0.5271121529854170 | 0.7289638744507911 | 0.5471723020052721 |
| 0.6553001754680068 | 0.8445663320144874 | 0.0158862629242336 |
| 0.6555019040246819 | 0.7342311380905997 | 0.7520061441448505 |
| 0.6612901797157562 | 0.7347896463756243 | 0.0050662169576299 |
| 0.7342511690912303 | 0.8039123843455300 | 0.8721338160541521 |
| 0.6445691547900125 | 0.8298859270060532 | 0.5804385074513050 |
| 0.7157000796508939 | 0.8994090348527877 | 0.7179953374199854 |
| 0.6253031777992035 | 0.8868011001290199 | 0.7129922317851225 |
| 0.5039122197699299 | 0.7077841220391292 | 0.4146189789349961 |
| 0.5537659357964344 | 0.7624166788925848 | 0.8911694624884561 |

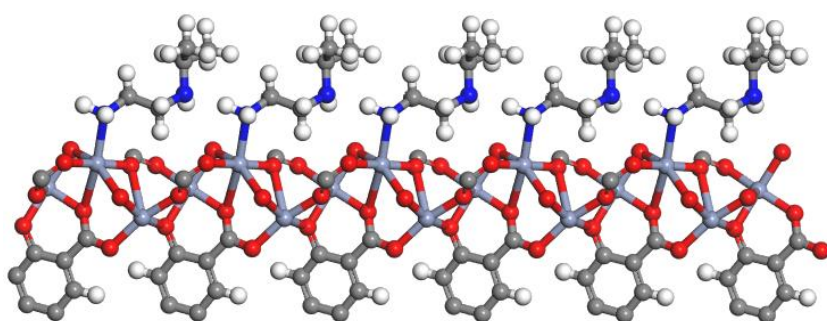

i-2-Cr<sub>2</sub>(dobpdc)

1.0000000000000000

21.4739195601767889      0.0920854796427979      0.0062904095401356

-11.2807480107393818      19.0265312259143258      0.0034321326514852

-0.0082698430839662      -0.0348992366412817      6.4697549947524511

Cr    O    C    H    N

6    18    47    32    2

Direct

0.3262515428282953      0.7431665550964865      0.7836461725726167

|                    |                    |                    |
|--------------------|--------------------|--------------------|
| 0.2600313956906461 | 0.6261622415387222 | 0.1211409260690033 |
| 0.3932635163511264 | 0.6806881585016740 | 0.4442792030744087 |
| 0.7081368681475695 | 0.3472316489516984 | 0.2314853643331816 |
| 0.5850537944862566 | 0.2799434129806926 | 0.8976657635858487 |
| 0.6399325081971980 | 0.3986994500914420 | 0.5661365631196844 |
| 0.4200199584238291 | 0.7742093569445956 | 0.6202313075138051 |
| 0.3834433947871787 | 0.7331034423997309 | 0.2003293483050186 |
| 0.3782489651414167 | 0.8148591654667428 | 0.0154412688140866 |
| 0.2324482048139345 | 0.6884930291220783 | 0.9482528643619830 |
| 0.2716587220342035 | 0.6887710949649630 | 0.5293838627638365 |
| 0.1840477729274852 | 0.6034124715905165 | 0.3438266001398134 |
| 0.3142630526921195 | 0.5878168872811145 | 0.2808487110726077 |
| 0.3165153776033662 | 0.6281779006893515 | 0.8668379785192712 |
| 0.3998555388133127 | 0.6221377791981979 | 0.6783739799729034 |
| 0.7342479176878953 | 0.4366259845785976 | 0.4037616809745259 |
| 0.6949978176304725 | 0.3969347757087007 | 0.8182992133750489 |
| 0.7829543968948940 | 0.3995944476735858 | 0.0061390157340000 |
| 0.6515897778041193 | 0.2552450493559277 | 0.0675086960840048 |
| 0.6504238986721163 | 0.2936253849194017 | 0.4826859463150868 |
| 0.5644987929999061 | 0.2079343996541425 | 0.6692582250636860 |
| 0.5470199913999494 | 0.3342105616023261 | 0.7348673713336566 |
| 0.5875342550405946 | 0.3354915362474529 | 0.1503718463644361 |
| 0.5871709748100074 | 0.4193857295758576 | 0.3391388844071344 |
| 0.4545662734495792 | 0.8388072190902847 | 0.5374803584516101 |
| 0.4448175911013053 | 0.8526185022059920 | 0.3281890121165318 |
| 0.4792431102145471 | 0.9220928861200548 | 0.2573864162554287 |
| 0.5263385733808477 | 0.9786625188465763 | 0.3818323942569108 |
| 0.5379137521567259 | 0.9641938405045138 | 0.5852078532443485 |
| 0.5030460139133623 | 0.8964384807162418 | 0.6616024852658668 |
| 0.3992327673108420 | 0.7970329614175569 | 0.1765593557183678 |
| 0.1653864264750453 | 0.6589180920924704 | 0.8653005157082774 |
| 0.1491808639719281 | 0.6327643188175642 | 0.6588895195504492 |
| 0.0770267756951810 | 0.5975144135189296 | 0.5907923875767693 |
| 0.0207731782044291 | 0.5901723969845420 | 0.7159809073039867 |
| 0.0382047640240870 | 0.6195629534732348 | 0.9157309489654182 |
| 0.1086138713416815 | 0.6531680696398965 | 0.9893531783590319 |
| 0.2047305681067826 | 0.6417349348168102 | 0.5062291123099172 |
| 0.3389708958795055 | 0.5483505238207655 | 0.1957025728858213 |
| 0.3642479824492284 | 0.5564912520874756 | 0.9879642269314317 |
| 0.3960548026513422 | 0.5180824725469151 | 0.9184770256366903 |
| 0.4005547028413048 | 0.4691110783437793 | 0.0429758608526214 |
| 0.3717654556881413 | 0.4587572032140130 | 0.2438077802177503 |
| 0.3416927225637778 | 0.4970441766281297 | 0.3188154511328420 |
| 0.3599594996095234 | 0.6048629213287100 | 0.8385375352265498 |
| 0.5575577526874156 | 0.7618072374223459 | 0.2240619920107605 |
| 0.5315337956341111 | 0.7255564831280026 | 0.0121049601902712 |

|                    |                    |                    |
|--------------------|--------------------|--------------------|
| 0.8010784914209879 | 0.4746140685378890 | 0.4882768830556898 |
| 0.8176327916274460 | 0.4648042397533629 | 0.6943388480357697 |
| 0.8896340782506513 | 0.5024655118080474 | 0.7639264947936653 |
| 0.9452401445157150 | 0.5519047535601587 | 0.6404494991805478 |
| 0.9272667942110289 | 0.5634160341415324 | 0.4409634943523599 |
| 0.8571119671799536 | 0.5259009294810966 | 0.3659153267420265 |
| 0.7624696358239831 | 0.4175542804169083 | 0.8442369254950535 |
| 0.6244312213767884 | 0.1907329104064388 | 0.1514699189474911 |
| 0.5976287307399204 | 0.1746731102477952 | 0.3573458971666525 |
| 0.5650114370742969 | 0.1051209708628633 | 0.4269344824331966 |
| 0.5613897096184743 | 0.0514131457135463 | 0.3042615308772980 |
| 0.5914802850136525 | 0.0688826529900908 | 0.1050790809586672 |
| 0.6220890149397320 | 0.1366160899886779 | 0.0295027332394184 |
| 0.6038535795732898 | 0.2280812175541485 | 0.5078789635435328 |
| 0.5100395937233912 | 0.3629975607778917 | 0.8182516179228401 |
| 0.5210985669105810 | 0.3893386186532553 | 0.0244716668823202 |
| 0.4851663895853164 | 0.4240365477700365 | 0.0926094160076332 |
| 0.4360688073243466 | 0.4307774339584043 | 0.9677400534157670 |
| 0.4227731819129019 | 0.4010526185887855 | 0.7683044050369645 |
| 0.4586436605563975 | 0.3679645388780415 | 0.6946438756789561 |
| 0.5681403529388618 | 0.3814647815330616 | 0.1761106217871387 |
| 0.6431408016015823 | 0.8191015667755153 | 0.8374618717136286 |
| 0.6812220899475534 | 0.7766354557395587 | 0.8235226951196637 |
| 0.6664064549237594 | 0.8727278419461513 | 0.6630555484948175 |
| 0.5174275415289671 | 0.6710420714736500 | 0.3918412819633943 |
| 0.4668399576250408 | 0.9307273320281766 | 0.1006205288962363 |
| 0.5754090798193729 | 0.0074885921148464 | 0.6844290930762753 |
| 0.5116028794465919 | 0.8864650063875104 | 0.8212681581544814 |
| 0.0661091469215336 | 0.5749518721554949 | 0.4356720219601797 |
| 0.9952883930456409 | 0.6162376766447082 | 0.0139379650814391 |
| 0.1216978127191624 | 0.6758257641398728 | 0.1443610985120571 |
| 0.4185116291490729 | 0.5287631340106600 | 0.7629183644916964 |
| 0.3728317154453578 | 0.4192135447779179 | 0.3417264031434826 |
| 0.3194406454557708 | 0.4885921178276291 | 0.4744330427793173 |
| 0.5392680205171274 | 0.8005790607360481 | 0.8160563471964508 |
| 0.5523724690860590 | 0.8088955260076531 | 0.2285209492137810 |
| 0.6154375427098842 | 0.7798257961117798 | 0.2420165070622602 |
| 0.4730526055102473 | 0.7036145972431171 | 0.0008531130655243 |
| 0.5409554019522176 | 0.6810992397365538 | 0.0010017096887722 |
| 0.9010370082076520 | 0.4911070019602235 | 0.9186364557412290 |
| 0.9696530979727740 | 0.6031918164977625 | 0.3439483236287231 |
| 0.8437335080756725 | 0.5351551192228499 | 0.2110187219777302 |
| 0.5416089205578984 | 0.0940811290470407 | 0.5813489703258341 |
| 0.5912078135618515 | 0.0281101686599357 | 0.0088462822073012 |
| 0.6453123671280565 | 0.1496492756717132 | 0.8749287449636753 |
| 0.4977453145802428 | 0.4466549733480889 | 0.2476724201442124 |

|                    |                    |                    |
|--------------------|--------------------|--------------------|
| 0.3828722506165363 | 0.4037597257362435 | 0.6702581795413138 |
| 0.4479786009840296 | 0.3451286886247260 | 0.5398412777434984 |
| 0.5373200461339636 | 0.7386776213189066 | 0.5414417243460576 |
| 0.6601545099359996 | 0.8496658815287788 | 0.9840369413520307 |
| 0.6660099537872313 | 0.7458111512992573 | 0.6794796673774357 |
| 0.6672854018842997 | 0.7402373244435339 | 0.9535100807641967 |
| 0.7400970683024255 | 0.8116744894219252 | 0.8251399964982937 |
| 0.6595168075609195 | 0.8481004329652180 | 0.5104166604484561 |
| 0.7237405842447018 | 0.9125932527818605 | 0.6810927560297202 |
| 0.6352309849977047 | 0.8997097709816799 | 0.6639899331256132 |
| 0.5155139051225675 | 0.7164125441731386 | 0.3955156302576341 |
| 0.5636588503941695 | 0.7712561179394086 | 0.8313261093232072 |

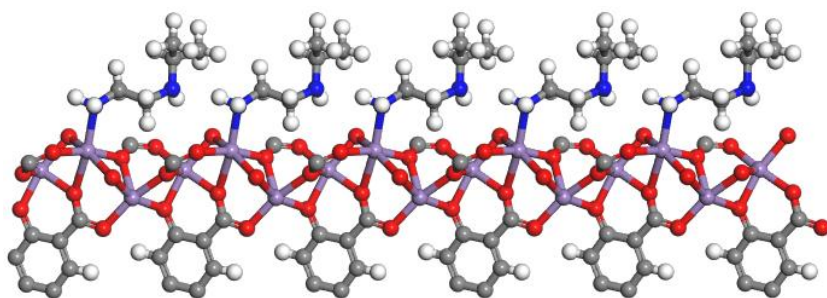

i-2-Mn<sub>2</sub>(dobpdc)

1.0000000000000000

|                      |                     |                     |
|----------------------|---------------------|---------------------|
| 21.4625301098827563  | -0.1917136113622649 | -0.0262129703920218 |
| -11.5429049965851913 | 19.1121815046733730 | 0.0358805792297401  |
| -0.0107021348511448  | -0.0353798989148343 | 6.9216703093010503  |

| Mn | O  | C  | H  | N |
|----|----|----|----|---|
| 6  | 18 | 47 | 32 | 2 |

Direct

|                    |                    |                    |
|--------------------|--------------------|--------------------|
| 0.3401672509622813 | 0.7372909310558313 | 0.8015419097610277 |
| 0.2686804187074117 | 0.6379416518683385 | 0.1502209154560319 |
| 0.3924253365972845 | 0.6782268959387849 | 0.4597614954327085 |
| 0.7031802347172516 | 0.3570736100478342 | 0.1977059565908021 |
| 0.5938604596907098 | 0.2857656883877198 | 0.8628608326676783 |
| 0.6318313212045936 | 0.3897452916093016 | 0.5305475433008837 |
| 0.4283677579964404 | 0.7777952202320080 | 0.6039949660943904 |
| 0.3722650283173934 | 0.7333023645631584 | 0.2329301859255253 |
| 0.3997635604398866 | 0.8160527632256986 | 0.0120723061184549 |
| 0.2377680760504646 | 0.6875410349322593 | 0.9397607957263148 |
| 0.2794886385243061 | 0.6758625487981433 | 0.5601798574462080 |
| 0.1878806355723057 | 0.6119612770423473 | 0.3547376277632495 |
| 0.3228158113460822 | 0.5908901540551668 | 0.2718213051974629 |
| 0.3326147059137341 | 0.6408765294597103 | 0.9036569416814189 |
| 0.3887912479633471 | 0.6122383095351722 | 0.6846875268529899 |
| 0.7364261820131546 | 0.4387066890475850 | 0.4017760246176252 |
| 0.6933489243450808 | 0.3841366575970824 | 0.7701511095883831 |
| 0.7818593041053603 | 0.4105411494164457 | 0.9851591426721811 |

|                    |                    |                    |
|--------------------|--------------------|--------------------|
| 0.6462742907425394 | 0.2564294445927260 | 0.0671410600689129 |
| 0.6328947677497325 | 0.2960081086088522 | 0.4358002445261846 |
| 0.5704856679381294 | 0.2101856210506696 | 0.6494529902045301 |
| 0.5457872410733842 | 0.3378023558389955 | 0.7323795262593507 |
| 0.6021969633887849 | 0.3520577315085021 | 0.1025576221700319 |
| 0.5787773559379872 | 0.4126688133488656 | 0.3160168340429834 |
| 0.4593085520210138 | 0.8419272798896955 | 0.5248112488848449 |
| 0.4508818300519053 | 0.8546158366470280 | 0.3265528134382478 |
| 0.4847689246205533 | 0.9242300539630790 | 0.2597875506406453 |
| 0.5277716776520407 | 0.9825022476061207 | 0.3773703610580981 |
| 0.5366634654964031 | 0.9694085527165797 | 0.5717725266418370 |
| 0.5035602089166176 | 0.9015835079177847 | 0.6430568432419221 |
| 0.4052786074182464 | 0.7986851922615585 | 0.1836724917002854 |
| 0.1709017607361574 | 0.6575046066555714 | 0.8590753948860907 |
| 0.1552530336709594 | 0.6339434262237873 | 0.6628566012387012 |
| 0.0826579414978852 | 0.6008248453593907 | 0.5954523779010046 |
| 0.0249163207809673 | 0.5908282184544618 | 0.7108760156098555 |
| 0.0414455295868450 | 0.6157813697799881 | 0.9028588488312295 |
| 0.1121798019272475 | 0.6481898757499351 | 0.9747550133561873 |
| 0.2104594449710149 | 0.6407231869569756 | 0.5208175852618240 |
| 0.3450259551042834 | 0.5511090799401330 | 0.1890064604755821 |
| 0.3634902059741734 | 0.5551195642641886 | 0.9890552466884515 |
| 0.3918692336434049 | 0.5150978455731305 | 0.9191800171313105 |
| 0.4014128951619043 | 0.4697817305923095 | 0.0359792937269887 |
| 0.3800558353561669 | 0.4640378036331967 | 0.2312634566893053 |
| 0.3526932874331905 | 0.5032517053534988 | 0.3055876921971290 |
| 0.3611057534467648 | 0.6046894363561108 | 0.8512661092676979 |
| 0.5516325747621096 | 0.7574075563697775 | 0.2408225439315359 |
| 0.5236556785585975 | 0.7196881085648812 | 0.0438271311841731 |
| 0.8033867347242420 | 0.4753472311901845 | 0.4834749694182889 |
| 0.8182660921895177 | 0.4669710106658229 | 0.6796286654345636 |
| 0.8907656458202169 | 0.5057412220714497 | 0.7488263226874992 |
| 0.9492227885005207 | 0.5533776798489498 | 0.6345876067720511 |
| 0.9333511094383482 | 0.5624737509398869 | 0.4427306145448782 |
| 0.8627221258810494 | 0.5247580993856147 | 0.3693095452893118 |
| 0.7620345507029640 | 0.4180586580459149 | 0.8177206292454500 |
| 0.6195619519440996 | 0.1930042508204792 | 0.1487982426605612 |
| 0.5958037973904524 | 0.1776942478559462 | 0.3449942512062378 |
| 0.5662293539592440 | 0.1088230466897855 | 0.4144535606717312 |
| 0.5606421994319888 | 0.0546027238156555 | 0.3008486216122321 |
| 0.5860294163683903 | 0.0710249361473601 | 0.1089187714291171 |
| 0.6144267888429553 | 0.1379622691447224 | 0.0348552871981127 |
| 0.5993474574258855 | 0.2302193842928091 | 0.4830420785826632 |
| 0.5107008732615483 | 0.3669057159927505 | 0.8126128873722962 |
| 0.5207959763667134 | 0.3907564315990584 | 0.0084482200572040 |
| 0.4838308627753136 | 0.4232819493271904 | 0.0755647277080911 |

|                    |                    |                    |
|--------------------|--------------------|--------------------|
| 0.4360939658633356 | 0.4322930941975827 | 0.9602206996438625 |
| 0.4249888781250277 | 0.4066130105205019 | 0.7688376717296421 |
| 0.4611003537292504 | 0.3749818539941501 | 0.6971438161341510 |
| 0.5697780565808443 | 0.3852470564959773 | 0.1486182290492764 |
| 0.6345902572111726 | 0.8121939255538280 | 0.8664513629850461 |
| 0.6728724920647196 | 0.7706937463685080 | 0.8560487127825311 |
| 0.6551219153757160 | 0.8620739170611884 | 0.6948102765303261 |
| 0.5123296540315962 | 0.6655592342356940 | 0.3964228056709374 |
| 0.4742716036737562 | 0.9312895921515079 | 0.1099025019823046 |
| 0.5709284562083070 | 0.0136791480314358 | 0.6679553629191233 |
| 0.5099459491808531 | 0.8924776627363613 | 0.7948003922683071 |
| 0.0725062103823007 | 0.5812577095356488 | 0.4472085877172276 |
| 0.9977495904098248 | 0.6101784897804947 | 0.9962081943137449 |
| 0.1244836942988030 | 0.6673243840355454 | 0.1235235488645117 |
| 0.4089995561836730 | 0.5227836355913169 | 0.7684962712644605 |
| 0.3847892025872000 | 0.4274271803540870 | 0.3255124757819701 |
| 0.3366826517925574 | 0.4988089058007645 | 0.4569216836360397 |
| 0.5289789200610002 | 0.7909436008344244 | 0.8485233743760432 |
| 0.5451342452644710 | 0.8031088368386179 | 0.2475707798929037 |
| 0.6104447879958812 | 0.7773677713325000 | 0.2561780209486173 |
| 0.4642618771211104 | 0.6966386085100353 | 0.0384402384198168 |
| 0.5326600724642105 | 0.6754630983688230 | 0.0363661188138096 |
| 0.9002771549851758 | 0.4958236410721284 | 0.8969154639729382 |
| 0.9776789545355555 | 0.6005923499559174 | 0.3504989379811221 |
| 0.8511732707779061 | 0.5321806669389986 | 0.2205554134757790 |
| 0.5460477633635392 | 0.0986932853679363 | 0.5624910258386890 |
| 0.5840568265492436 | 0.0301980124791115 | 0.0171618296870264 |
| 0.6339690116057000 | 0.1501152046693122 | 0.8862756944907488 |
| 0.4953594735141635 | 0.4432003435214114 | 0.2234746434813744 |
| 0.3864575501247032 | 0.4110445501878530 | 0.6756234843101510 |
| 0.4520851133007184 | 0.3554005787935992 | 0.5488023161994775 |
| 0.5327298474087527 | 0.7326574409255642 | 0.5371235309773326 |
| 0.6543478406903844 | 0.8456055464943475 | 0.9983652952858506 |
| 0.6551073195646850 | 0.7372863587182223 | 0.7259017670154719 |
| 0.6607510544295607 | 0.7365156722746917 | 0.9821600794667233 |
| 0.7325089998456775 | 0.8066812229422382 | 0.8500675404514482 |
| 0.6447884027468120 | 0.8338436413116099 | 0.5568328768199962 |
| 0.7135940836480756 | 0.9028637750204567 | 0.7008412166976683 |
| 0.6239883586059278 | 0.8885184058804967 | 0.6939852717281667 |
| 0.5099653382118561 | 0.7102097683772399 | 0.4030393982351086 |
| 0.5543040113763311 | 0.7633706903159236 | 0.8700396971215980 |



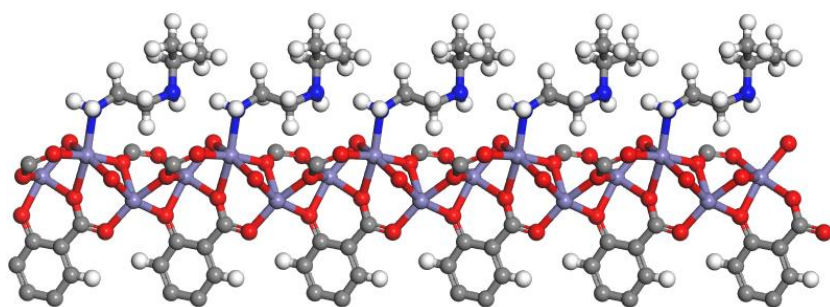

i-2-Fe<sub>2</sub>(dobpdc)

1.00000000000000

21.0783492546250208 -0.2368416213038627 0.0255988437613205

-11.3664262364149469 19.2405012959621544 0.0053913481734160

0.0046872915612503 -0.0321453114575034 6.8077047808917879

Fe O C H N

6 18 47 32 2

Direct

0.3413495929872497 0.7385966655489753 0.8026827256508540

0.2745605062569894 0.6428981897184656 0.1439381594244225

0.3907056550351342 0.6817684881816390 0.4659665622035547

0.6988632453904131 0.3526862326677431 0.1952519387936675

0.5938263094543359 0.2855780359302429 0.8611450699354961

0.6298540711253366 0.3838051506748243 0.5293357216145580

0.4299327124580543 0.7799232762297734 0.6080409137569944

0.3753033103261671 0.7352103504481562 0.2366339181568264

0.4005169198958427 0.8153885924683024 0.0069828349688663

0.2399087728692351 0.6909309076789611 0.9401367237577816

0.2835372060671446 0.6793515153002332 0.5655928308594653

0.1946207595622909 0.6218778771096538 0.3429299649698052

0.3253970683836513 0.5957159301904227 0.2738459260451336

0.3355547605465432 0.6445957172365908 0.9045504395226658

0.3893378690441125 0.6136919055964327 0.6763768941423933

0.7326327142604967 0.4344653672216197 0.3961880236693105

0.6899573594315314 0.3819050929510723 0.7654399814322304

0.7776530815579719 0.4102510497337803 0.9913542635487644

0.6478242307521285 0.2557749206368314 0.0608549065171857

0.6345576874122827 0.2946164419917068 0.4309055040737206

0.5753668209103679 0.2114892207829584 0.6562336644810145

0.5419790247272687 0.3321111405862069 0.7282610803150575

0.5973812827250313 0.3448637131209367 0.0989394440300089

0.5720897808970662 0.4023123056881204 0.3241035209781771

0.4611658367860798 0.8436493678021506 0.5269730483780890

0.4527359721851667 0.8559647474394652 0.3251745550359857

0.4863948174691117 0.9250108018309220 0.2559095295706157

0.5297764165541636 0.9830901616676186 0.3746672783094951

0.5392073283203018 0.9703088246229541 0.5721587109131079

0.5059493751790782 0.9030697224792732 0.6461043889012075

|                    |                    |                    |
|--------------------|--------------------|--------------------|
| 0.4072288519722562 | 0.7996117785975656 | 0.1826298486774434 |
| 0.1721915359731625 | 0.6604958497711095 | 0.8588620198164350 |
| 0.1570524174130270 | 0.6375639701366538 | 0.6589799865155257 |
| 0.0835082908909328 | 0.6032879417956138 | 0.5902033977254533 |
| 0.0243104393645552 | 0.5919666150558740 | 0.7082827221748715 |
| 0.0404265098141536 | 0.6171387781624560 | 0.9033351718282319 |
| 0.1120150832425821 | 0.6504170883086360 | 0.9766983879743307 |
| 0.2144673228320997 | 0.6464713487377765 | 0.5168613584867074 |
| 0.3457897969333317 | 0.5540273352716696 | 0.1902722617452000 |
| 0.3641384985951746 | 0.5569509296024009 | 0.9866179190144280 |
| 0.3910705786848183 | 0.5151514118158502 | 0.9152686907010477 |
| 0.3985632487496886 | 0.4686662263499102 | 0.0343454344529022 |
| 0.3766053930192683 | 0.4636689968653442 | 0.2327777041307684 |
| 0.3510636967826670 | 0.5048620634501901 | 0.3087731793926665 |
| 0.3626298142532178 | 0.6068768563661990 | 0.8475436995234773 |
| 0.5517958454129186 | 0.7576480708609097 | 0.2497111467936932 |
| 0.5239475521219319 | 0.7206956031833869 | 0.0490441615988289 |
| 0.8002121709036771 | 0.4725131955717785 | 0.4787070578325086 |
| 0.8157235634231270 | 0.4655578177836333 | 0.6789004838303612 |
| 0.8890014163573383 | 0.5053439113890690 | 0.7490893582975389 |
| 0.9475641860953488 | 0.5531418559423642 | 0.6319168785213805 |
| 0.9309151865985683 | 0.5612741109423425 | 0.4366204852432531 |
| 0.8596289203696230 | 0.5222975678370716 | 0.3619093714017865 |
| 0.7588989185092743 | 0.4169797344177866 | 0.8185510731155787 |
| 0.6214927256132583 | 0.1926726258198244 | 0.1433643139003564 |
| 0.5979778704480623 | 0.1772720795339637 | 0.3436118983942222 |
| 0.5681885430115230 | 0.1087095111070866 | 0.4138277756117930 |
| 0.5626813551829173 | 0.0548518279626506 | 0.2972472995435851 |
| 0.5884899603430682 | 0.0714300654237903 | 0.1019188668116229 |
| 0.6167614568689501 | 0.1380027167221485 | 0.0267321626531469 |
| 0.6022729978747989 | 0.2298167692087958 | 0.4837656586161430 |
| 0.5061672409706262 | 0.3613574340291024 | 0.8097531125574875 |
| 0.5156342855881419 | 0.3846802101814220 | 0.0092605841661708 |
| 0.4792079457630081 | 0.4186313652620868 | 0.0769920605463597 |
| 0.4320467738626235 | 0.4291426600660273 | 0.9587265628484474 |
| 0.4204558855769633 | 0.4029165061820237 | 0.7647286925456100 |
| 0.4562931317564178 | 0.3701337240318239 | 0.6921847317666234 |
| 0.5639321748738979 | 0.3772597156082682 | 0.1508671474564096 |
| 0.6370737447383377 | 0.8130791558743411 | 0.8722073823369314 |
| 0.6763883649724463 | 0.7717176750610832 | 0.8622144069303488 |
| 0.6589088598750479 | 0.8634806979255316 | 0.6991498663474403 |
| 0.5079008571395676 | 0.6658711874475927 | 0.4074301952045403 |
| 0.4755289822222863 | 0.9317553945433730 | 0.1035635175365215 |
| 0.5741794259689215 | 0.0145523286409883 | 0.6685191702628615 |
| 0.5128111012097278 | 0.8942543942135899 | 0.8001700890012060 |
| 0.0739228456336321 | 0.5839785143381562 | 0.4393351799224519 |

|                    |                    |                    |
|--------------------|--------------------|--------------------|
| 0.9954316615867214 | 0.6108921578280473 | 0.9977430457670309 |
| 0.1239669765152271 | 0.6696341321833330 | 0.1277246592225652 |
| 0.4086457999773501 | 0.5222254325836957 | 0.7620586601618129 |
| 0.3795092246295013 | 0.4259820459953687 | 0.3281188613660646 |
| 0.3346205016553228 | 0.5009786896578845 | 0.4624546595685644 |
| 0.5299301267672618 | 0.7923126126882281 | 0.8521428915439486 |
| 0.5471627766472054 | 0.8044840721900925 | 0.2549760630304831 |
| 0.6109574697634130 | 0.7755054648701005 | 0.2673901810619554 |
| 0.4638359274955874 | 0.6984335398769588 | 0.0435844040519413 |
| 0.5329911320222323 | 0.6763997696619342 | 0.0405165939685261 |
| 0.8989908296206650 | 0.4961839138822413 | 0.9000034323868249 |
| 0.9753723843192219 | 0.5997909484777040 | 0.3428533771411182 |
| 0.8475107434428821 | 0.5289623349738051 | 0.2105778333419295 |
| 0.5479033926300616 | 0.0986309428279739 | 0.5647384751933515 |
| 0.5869728860946140 | 0.0308501075964074 | 0.0085400030911771 |
| 0.6365818457543639 | 0.1501968282770747 | 0.8755606600060446 |
| 0.4908919995580945 | 0.4385010735088102 | 0.2272830138417632 |
| 0.3817282829352919 | 0.4080191858367428 | 0.6701454894885259 |
| 0.4470819686559224 | 0.3503815871519862 | 0.5417098501417925 |
| 0.5309741133199495 | 0.7332979979368517 | 0.5505688670898294 |
| 0.6560051063800287 | 0.8457577888848817 | 0.0074112842820853 |
| 0.6596995034438109 | 0.7392139405427116 | 0.7285584959739353 |
| 0.6632258973419383 | 0.7370084475260725 | 0.9891934656366246 |
| 0.7368536421719654 | 0.8074333861778271 | 0.8591932012006396 |
| 0.6494850969032555 | 0.8360014713976085 | 0.5580984981370278 |
| 0.7180770054083752 | 0.9038889373405183 | 0.7077004263627558 |
| 0.6271694613232484 | 0.8899744157412428 | 0.6978518633013948 |
| 0.5077139492988252 | 0.7116399293132432 | 0.4137570585871657 |
| 0.5556642289600404 | 0.7645816121352453 | 0.8731436423419083 |

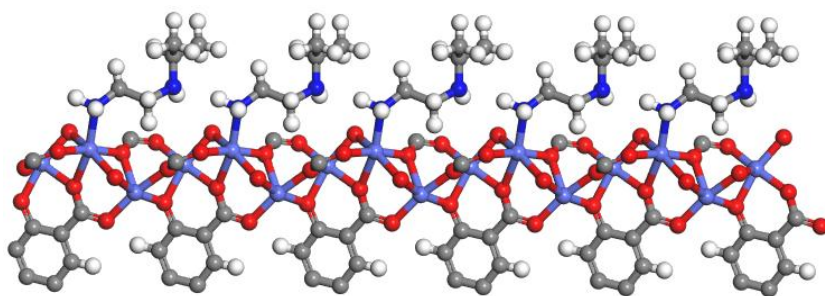

i-2-Co<sub>2</sub>(dobpdc)

1.0000000000000000

21.0343109661598469 -0.1604947301461227 -0.0032397699598708

-11.2804617395312583 18.9354990710393523 0.0174698313525647

-0.0060456427684875 -0.0336951081146525 6.7771986598666025

Co O C H N

6 18 47 32 2

Direct

0.3420621916730582 0.7391981401127907 0.8034712182348898

|                    |                    |                    |
|--------------------|--------------------|--------------------|
| 0.2734268407511635 | 0.6431961647070494 | 0.1418936974228941 |
| 0.3880797700099592 | 0.6800045684341711 | 0.4629874018579514 |
| 0.7010807712921618 | 0.3579274783054771 | 0.1926567069687337 |
| 0.5983337588300444 | 0.2888849933326298 | 0.8581837849444582 |
| 0.6305960075825752 | 0.3862225721733594 | 0.5262501498511440 |
| 0.4256229129624103 | 0.7780548335298008 | 0.6104342513445786 |
| 0.3724673541571448 | 0.7333329187761066 | 0.2376350706977632 |
| 0.3961486558576297 | 0.8147871693520656 | 0.0087721491810910 |
| 0.2415110264264086 | 0.6904770560374445 | 0.9417251449598965 |
| 0.2846378267235607 | 0.6749702545605629 | 0.5715132194193799 |
| 0.1964009830129356 | 0.6216158232647118 | 0.3420135890456351 |
| 0.3189685673859088 | 0.5926886037703625 | 0.2744751179422451 |
| 0.3381266259307552 | 0.6487879857283758 | 0.9097718996374837 |
| 0.3874957868146254 | 0.6145447272071465 | 0.6763664537895906 |
| 0.7334735989755714 | 0.4363172671931537 | 0.3912202523416966 |
| 0.6911376224539083 | 0.3806975831595167 | 0.7554243685276916 |
| 0.7777593694416822 | 0.4097226104004079 | 0.9873061448376816 |
| 0.6489483211709128 | 0.2597563263972660 | 0.0562546117824638 |
| 0.6325260863282622 | 0.2988158628282775 | 0.4205618882114308 |
| 0.5759252988367862 | 0.2159156142567440 | 0.6519583114507910 |
| 0.5475211599960375 | 0.3369997207857836 | 0.7225131731918921 |
| 0.6057437994492574 | 0.3529485665716550 | 0.0882188331988303 |
| 0.5785440123219914 | 0.4082212702520209 | 0.3193564564202873 |
| 0.4595460937128095 | 0.8428419600904675 | 0.5288752079507049 |
| 0.4518361047089101 | 0.8555254495953335 | 0.3257566557743274 |
| 0.4873979439827352 | 0.9254569507717179 | 0.2554305400032604 |
| 0.5322240289604210 | 0.9840872882054512 | 0.3745757139194836 |
| 0.5414200110097838 | 0.9708582075470815 | 0.5729192159072056 |
| 0.5061907580638376 | 0.9026436137861609 | 0.6479242538212375 |
| 0.4044821500264462 | 0.7984996102370232 | 0.1836481296983195 |
| 0.1736370046052613 | 0.6605406235615732 | 0.8591082125164888 |
| 0.1585667646445899 | 0.6374819071296969 | 0.6584945455283346 |
| 0.0851271068166000 | 0.6041034346953609 | 0.5877421721243650 |
| 0.0260385413415349 | 0.5936172941081210 | 0.7055616366344921 |
| 0.0422908223617142 | 0.6190641707421918 | 0.9014463408576461 |
| 0.1139014415572888 | 0.6517394115221009 | 0.9763719064652747 |
| 0.2161886883751478 | 0.6449933878672525 | 0.5180731940928425 |
| 0.3409826990164149 | 0.5517421080709255 | 0.1901070223122261 |
| 0.3610062783861707 | 0.5560020072544916 | 0.9867043435412839 |
| 0.3885881852216357 | 0.5142338840491760 | 0.9151563636855684 |
| 0.3960503428014377 | 0.4668925588455153 | 0.0342550498063829 |
| 0.3728977496463060 | 0.4606868615668702 | 0.2324728407932355 |
| 0.3459537797082035 | 0.5014303711551307 | 0.3082018658828645 |
| 0.3614669101393133 | 0.6081604249488919 | 0.8487376033816929 |
| 0.5479736853235195 | 0.7548077830663402 | 0.2558412529728429 |
| 0.5200163012587851 | 0.7182313765073900 | 0.0534451232102739 |

|                    |                    |                    |
|--------------------|--------------------|--------------------|
| 0.8014487971323589 | 0.4743270552001704 | 0.4740815312744502 |
| 0.8169113867573188 | 0.4667900727790624 | 0.6748032612775603 |
| 0.8902669843807303 | 0.5067219020876053 | 0.7460183379378122 |
| 0.9491041629595713 | 0.5550232511861353 | 0.6284815953893812 |
| 0.9325146850231363 | 0.5636725176776025 | 0.4325528801654812 |
| 0.8609666261215665 | 0.5247166860012058 | 0.3571975486457291 |
| 0.7595114565312855 | 0.4167520927683555 | 0.8127706871169664 |
| 0.6232211802779517 | 0.1959272911048586 | 0.1396911264275076 |
| 0.5995633195514358 | 0.1805507053097273 | 0.3404766715001486 |
| 0.5706988874992476 | 0.1114458139291585 | 0.4126507441880420 |
| 0.5659044700503415 | 0.0569006695592762 | 0.2966085722977212 |
| 0.5920272268196598 | 0.0735443050005031 | 0.1008903550532878 |
| 0.6197646852267482 | 0.1408276032688960 | 0.0241610534357335 |
| 0.6024242056998332 | 0.2340273855231487 | 0.4780738007273087 |
| 0.5099907318585721 | 0.3648787050127140 | 0.8051041274633661 |
| 0.5191621473121870 | 0.3881163075164125 | 0.0056704632024207 |
| 0.4803432683554760 | 0.4198595958305518 | 0.0759248111301716 |
| 0.4313838040805109 | 0.4285617681693452 | 0.9579730814481877 |
| 0.4204262577593099 | 0.4025968834632891 | 0.7625958980159382 |
| 0.4583818613710875 | 0.3716408153755424 | 0.6880474566902848 |
| 0.5701897090744197 | 0.3830419755691992 | 0.1447571444751290 |
| 0.6358821746644381 | 0.8087828030915105 | 0.8801196601015064 |
| 0.6714691707309228 | 0.7634247897905055 | 0.8734326457494817 |
| 0.6608861265539971 | 0.8601309948604055 | 0.7062618714514812 |
| 0.5004996350073228 | 0.6614184699472148 | 0.4131708759374391 |
| 0.4766893470806153 | 0.9326349461371493 | 0.1024266356357657 |
| 0.5774950596405546 | 0.0154990893233133 | 0.6693337545518006 |
| 0.5126949797860050 | 0.8935252091125818 | 0.8028867886154814 |
| 0.0753569382447665 | 0.5844870835444524 | 0.4362230787053036 |
| 0.9974438974806574 | 0.6135168622739684 | 0.9953918542805056 |
| 0.1260820916627381 | 0.6712431303987287 | 0.1280556296745488 |
| 0.4072445188752241 | 0.5223779150520329 | 0.7622368834258282 |
| 0.3759146079274558 | 0.4224055105314122 | 0.3278952844981404 |
| 0.3282570843773911 | 0.4963982866715781 | 0.4616178700464246 |
| 0.5307815009429078 | 0.7932377362916014 | 0.8578979513034923 |
| 0.5457803584291980 | 0.8035949551961963 | 0.2611663814113356 |
| 0.6064468345744487 | 0.7704567500594877 | 0.2773183728503454 |
| 0.4603223209954024 | 0.6980407534960094 | 0.0457393666594470 |
| 0.5266192761963211 | 0.6718568128509119 | 0.0452429336013296 |
| 0.9002319675417993 | 0.4970903586815467 | 0.8974147483708563 |
| 0.9771797744644459 | 0.6025470474057641 | 0.3386283849578717 |
| 0.8488204085849347 | 0.5318210831096692 | 0.2053919874025851 |
| 0.5500642045757971 | 0.1012476968033340 | 0.5637773156701016 |
| 0.5910467501190979 | 0.0324437909908184 | 0.0082403977154257 |
| 0.6399073745568629 | 0.1531469357942257 | 0.8727118002708210 |
| 0.4917189955748142 | 0.4398378662408717 | 0.2271375839643142 |

|                    |                    |                    |
|--------------------|--------------------|--------------------|
| 0.3805815080405566 | 0.4065126256837956 | 0.6683104628381997 |
| 0.4495277370018016 | 0.3518992084104369 | 0.5366058084598038 |
| 0.5242239411546308 | 0.7299118782180685 | 0.5565914752703165 |
| 0.6556322102817802 | 0.8417902022743533 | 0.0162170720487893 |
| 0.6534528074886055 | 0.7299950623540283 | 0.7399975366257010 |
| 0.6563682166026226 | 0.7283738829824102 | 0.0020259587420028 |
| 0.7323688261350085 | 0.7973135890111038 | 0.8713687408846837 |
| 0.6506008965343781 | 0.8319467548013861 | 0.5648196867025277 |
| 0.7207599242057228 | 0.8990451856050470 | 0.7168094787467112 |
| 0.6316394570214143 | 0.8894682817385302 | 0.7029853811506754 |
| 0.5015427887964208 | 0.7084583426833717 | 0.4179257336251325 |
| 0.5538988852525435 | 0.7627060077883101 | 0.8780283290501600 |

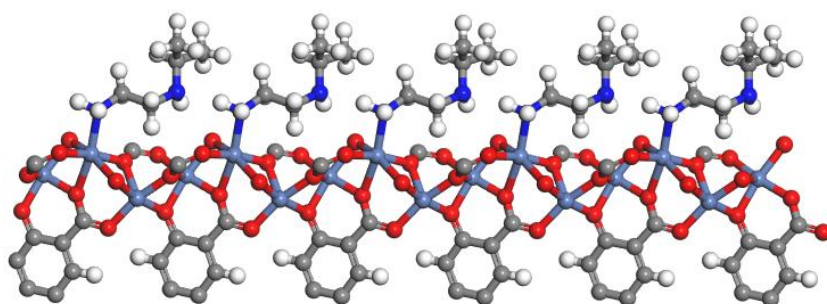

i-2-Ni<sub>2</sub>(dobpdc)

1.0000000000000000

|                      |                     |                     |
|----------------------|---------------------|---------------------|
| 20.8111277981778606  | -0.2150282148164627 | 0.0098827147237649  |
| -11.2050368417407178 | 19.0037273089243968 | -0.0029355892941876 |
| -0.0004736035756570  | -0.0377113107330660 | 6.7065139064466708  |

Ni O C H N

6 18 47 32 2

Direct

|                    |                    |                    |
|--------------------|--------------------|--------------------|
| 0.3392505030530870 | 0.7373111232353011 | 0.8037328078355088 |
| 0.2766414628943821 | 0.6437285383266484 | 0.1394687428462689 |
| 0.3923620159099528 | 0.6842198156588921 | 0.4631344125773680 |
| 0.6965368942524393 | 0.3517819346572395 | 0.1984439271483609 |
| 0.5960656728779128 | 0.2888662739323848 | 0.8642724793420982 |
| 0.6316045202385752 | 0.3829813499136989 | 0.5324694327912951 |
| 0.4297969587428270 | 0.7789957697634051 | 0.6209267313501527 |
| 0.3733365781739550 | 0.7321776609033606 | 0.2348439702362697 |
| 0.3943129806310068 | 0.8133044787472343 | 0.0077693824076519 |
| 0.2428887903251251 | 0.6935803020896572 | 0.9487485767268922 |
| 0.2875328966112889 | 0.6819827519002715 | 0.5668185683711826 |
| 0.1985607267218867 | 0.6225882683333808 | 0.3399301866931310 |
| 0.3191390216122585 | 0.5934319109997759 | 0.2784347778304479 |
| 0.3355111484315003 | 0.6477641939183698 | 0.9037410422998207 |
| 0.3919775706001616 | 0.6173527859392394 | 0.6763240589761494 |
| 0.7290969047718292 | 0.4345521184503482 | 0.3898869232220790 |
| 0.6863629441983576 | 0.3799474827579203 | 0.7671036214083671 |
| 0.7745528738906486 | 0.4072952567839110 | 0.9962446558777813 |

|                    |                    |                    |
|--------------------|--------------------|--------------------|
| 0.6520093513525822 | 0.2596916265751830 | 0.0540110702906915 |
| 0.6368463726169082 | 0.2990477445680213 | 0.4320351606092672 |
| 0.5761593621046401 | 0.2155922625618203 | 0.6600746483301378 |
| 0.5430062055907712 | 0.3295990624122851 | 0.7213311431242886 |
| 0.6003632813355182 | 0.3439303075279412 | 0.1004682387268687 |
| 0.5753422159334463 | 0.4022170904915470 | 0.3288745749689781 |
| 0.4596157281158426 | 0.8427428744672625 | 0.5345408209759697 |
| 0.4498305125816771 | 0.8545266960057347 | 0.3294079351689518 |
| 0.4835318248899583 | 0.9241888087494843 | 0.2576478201480867 |
| 0.5282366544275803 | 0.9834299900465169 | 0.3761626316613302 |
| 0.5387849078854003 | 0.9712473094024929 | 0.5763145051568230 |
| 0.5055849956917555 | 0.9035032487501979 | 0.6528217749042753 |
| 0.4034403029818634 | 0.7975689096825747 | 0.1834980668997588 |
| 0.1743923474550542 | 0.6614287437869422 | 0.8635590571215630 |
| 0.1592774725635948 | 0.6376937712882125 | 0.6608433172504320 |
| 0.0849162510421806 | 0.6022999462468874 | 0.5902510745393883 |
| 0.0247206747542776 | 0.5906738109475711 | 0.7092196367627253 |
| 0.0407855788151750 | 0.6167078082545743 | 0.9065598452122927 |
| 0.1132247241043203 | 0.6510883109289267 | 0.9816737275920602 |
| 0.2177715582488560 | 0.6473936276581043 | 0.5161117449494128 |
| 0.3419439485347340 | 0.5530448696303694 | 0.1921738481625255 |
| 0.3627757939089236 | 0.5576521213347334 | 0.9870447211044393 |
| 0.3912666778221876 | 0.5162637201397899 | 0.9147003223325285 |
| 0.3983379192145620 | 0.4686547905063065 | 0.0345274624365146 |
| 0.3744703379356196 | 0.4622245172446355 | 0.2345030364752034 |
| 0.3469861418356999 | 0.5027486657452869 | 0.3111031505169137 |
| 0.3630347968993064 | 0.6094565664984728 | 0.8471039009148953 |
| 0.5509965496863813 | 0.7564291881831835 | 0.2485659352434055 |
| 0.5234293790408984 | 0.7197656637189027 | 0.0438656701733180 |
| 0.7974984988653731 | 0.4713214627367890 | 0.4757045171984942 |
| 0.8134860338601584 | 0.4634354006931787 | 0.6783893554316194 |
| 0.8877415733867480 | 0.5029609820293288 | 0.7495616265974334 |
| 0.9470619135291116 | 0.5514219360959700 | 0.6313461518573362 |
| 0.9300963448125259 | 0.5604349475472787 | 0.4341069501904471 |
| 0.8578153019259531 | 0.5218199376897132 | 0.3585016287157217 |
| 0.7562250517238027 | 0.4145996833051484 | 0.8211926934552665 |
| 0.6235092548128378 | 0.1957743632169056 | 0.1395854896085851 |
| 0.5986610246823574 | 0.1801932844576442 | 0.3422550291907882 |
| 0.5675836276301354 | 0.1107645952074208 | 0.4136427992809573 |
| 0.5618379368886863 | 0.0558833165158674 | 0.2963553395596321 |
| 0.5887855833198472 | 0.0724223310825494 | 0.0991347746341091 |
| 0.6184723451234149 | 0.1399296564637282 | 0.0227732222836963 |
| 0.6032108142133552 | 0.2333851539345702 | 0.4855775379186085 |
| 0.5078567239018312 | 0.3601827331525556 | 0.8059847313469817 |
| 0.5178936608925184 | 0.3844180130982906 | 0.0083817490204083 |
| 0.4810547197708530 | 0.4188537761975084 | 0.0774179759331091 |

|                    |                    |                    |
|--------------------|--------------------|--------------------|
| 0.4328769046500369 | 0.4291463634268169 | 0.9577973374414626 |
| 0.4207727902353469 | 0.4021882675550046 | 0.7613768291576051 |
| 0.4568952210602504 | 0.3688036443477927 | 0.6876674269353771 |
| 0.5668249662888911 | 0.3771664266229919 | 0.1532801824939369 |
| 0.6385515929148298 | 0.8135952402062543 | 0.8700081580562440 |
| 0.6785482382466839 | 0.7717991546407816 | 0.8622339291784868 |
| 0.6617637959360039 | 0.8652421022083701 | 0.6959497831447052 |
| 0.5033517696334400 | 0.6624352758574759 | 0.4044642843933843 |
| 0.4717780679488683 | 0.9305057542661146 | 0.1032036410340780 |
| 0.5747773989624179 | 0.0163534960715737 | 0.6725158468782908 |
| 0.5136755295299409 | 0.8951111531824907 | 0.8087857742783200 |
| 0.0755546673273457 | 0.5825601792991151 | 0.4372040063487432 |
| 0.9951139515189098 | 0.6104827798154346 | 0.0014190999502190 |
| 0.1251652416404383 | 0.6711818140550676 | 0.1343844877076066 |
| 0.4105140128521612 | 0.5246482762317441 | 0.7605170586490146 |
| 0.3772571411995642 | 0.4237928289469934 | 0.3304292315551578 |
| 0.3286369766114490 | 0.4974391195083072 | 0.4657155923038019 |
| 0.5297511469015745 | 0.7919816216121873 | 0.8432245589529757 |
| 0.5473757342093677 | 0.8044337302657567 | 0.2546260216612737 |
| 0.6104030417126651 | 0.7732286502140866 | 0.2698035067469391 |
| 0.4628724049949611 | 0.6982110207291754 | 0.0369828520438915 |
| 0.5318111108979124 | 0.6744220300021126 | 0.0352648122215840 |
| 0.8978691767942450 | 0.4931626965531208 | 0.9022308319202921 |
| 0.9750493156478157 | 0.5995294807275187 | 0.3395618480097298 |
| 0.8454559506186428 | 0.5294330281509971 | 0.2058318634943674 |
| 0.5465643359516434 | 0.1008319347500830 | 0.5662439074013648 |
| 0.5872865416939135 | 0.0311131602712393 | 0.0053097533599029 |
| 0.6394842365508921 | 0.1520853238966851 | 0.8702877461603009 |
| 0.4931025176233348 | 0.4391668723317537 | 0.2298744987789476 |
| 0.3811915578086840 | 0.4070240245599095 | 0.6658375244398087 |
| 0.4469761001244379 | 0.3482365320007617 | 0.5354817754819052 |
| 0.5283340311170193 | 0.7305833801941048 | 0.5531906450013793 |
| 0.6566047775462636 | 0.8462119877378811 | 0.0083883560477815 |
| 0.6623243706320991 | 0.7390011838255219 | 0.7263117306941282 |
| 0.6646187342556971 | 0.7365535993586150 | 0.9909408754370617 |
| 0.7397136055589257 | 0.8079361089192574 | 0.8615521357616842 |
| 0.6532621180081293 | 0.8380145807521941 | 0.5520562336286474 |
| 0.7215221882605718 | 0.9060681536965305 | 0.7081597873163190 |
| 0.6295407703947191 | 0.8920163786502329 | 0.6934399149987627 |
| 0.5051027341614045 | 0.7096950123783756 | 0.4124248598523579 |
| 0.5562826823319753 | 0.7643720870900310 | 0.8665705341650636 |



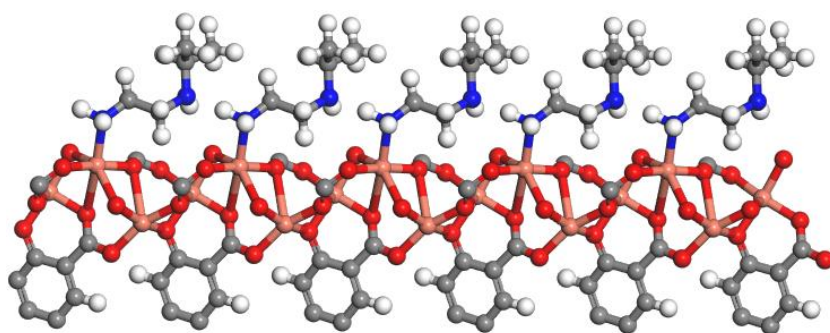

i-2-Cu<sub>2</sub>(dobpdc)

|                      |                     |                    |    |   |
|----------------------|---------------------|--------------------|----|---|
| 1.00000000000000     |                     |                    |    |   |
| 21.2219820949987614  | 0.0087766520897071  | 0.0094741409649601 |    |   |
| -11.2313664326774969 | 18.6832530954166494 | 0.0343819156790462 |    |   |
| -0.0064777893608211  | -0.0242980109265462 | 6.1904742678422151 |    |   |
| Cu                   | O                   | C                  | H  | N |
| 6                    | 18                  | 47                 | 32 | 2 |

Direct

|                    |                    |                    |
|--------------------|--------------------|--------------------|
| 0.3276364347474257 | 0.7410106187454772 | 0.7763183978091064 |
| 0.2613913175377149 | 0.6262329111491098 | 0.1097427193567100 |
| 0.3992814761295307 | 0.6819484716871571 | 0.4301684462821385 |
| 0.7064180051450393 | 0.3513039102595172 | 0.2514949534733617 |
| 0.5872706622595203 | 0.2846143180187042 | 0.9179395449816496 |
| 0.6402003414998632 | 0.4002568548505181 | 0.5852132946336326 |
| 0.4217211332753905 | 0.7703777460231649 | 0.6285405393206460 |
| 0.3917813316723553 | 0.7315268302001527 | 0.1828925249967952 |
| 0.3782959969895785 | 0.8122606319787806 | 0.0038334135535223 |
| 0.2382707045241474 | 0.6931210774964356 | 0.9520883256577690 |
| 0.2761256466403950 | 0.6969403220362054 | 0.5106247406604894 |
| 0.1870502224953654 | 0.6057402106905485 | 0.3267166784924598 |
| 0.3066808360549942 | 0.5847724958424934 | 0.2811947820423626 |
| 0.3079130015415998 | 0.6220779980564188 | 0.8446224230177393 |
| 0.3968685636967990 | 0.6199482257711324 | 0.6588992407318983 |
| 0.7300266965074016 | 0.4419231631462068 | 0.4085119817376821 |
| 0.6924920980407521 | 0.4071138810660244 | 0.8476061838954010 |
| 0.7805794513276609 | 0.4041309733605019 | 0.0327510537301379 |
| 0.6576289736060588 | 0.2635947902065396 | 0.0745338173583079 |
| 0.6596528208871106 | 0.2999806243846024 | 0.5134399686248585 |
| 0.5671616607801582 | 0.2128553137070881 | 0.6982998927204775 |
| 0.5463455900405023 | 0.3310015797679213 | 0.7409993546006461 |
| 0.5816094395132225 | 0.3294881155511575 | 0.1801030142381350 |
| 0.5867924469837718 | 0.4192953467885374 | 0.3657292519011790 |
| 0.4567573139100318 | 0.8365788220810515 | 0.5453742248592377 |
| 0.4455322311472329 | 0.8515695189174082 | 0.3295902116007667 |
| 0.4793119558054642 | 0.9227100852747299 | 0.2580347124359648 |
| 0.5284098999614102 | 0.9799520225135723 | 0.3885696706591659 |
| 0.5427076855656594 | 0.9643028168953549 | 0.5964689396423069 |
| 0.5079523809594590 | 0.8948362860372399 | 0.6741965123404796 |

|                    |                    |                    |
|--------------------|--------------------|--------------------|
| 0.4017912615770953 | 0.7947679260213008 | 0.1679888398255542 |
| 0.1704467220288635 | 0.6647667506874555 | 0.8669179257841222 |
| 0.1524221977234959 | 0.6362075017995537 | 0.6542130209675889 |
| 0.0788958525990893 | 0.6008814119589232 | 0.5850977262766150 |
| 0.0232519562822375 | 0.5966676907254680 | 0.7163483806622040 |
| 0.0428531691636778 | 0.6297744542423089 | 0.9202585878291956 |
| 0.1146520785963787 | 0.6633299622539823 | 0.9951037134257987 |
| 0.2088437832830721 | 0.6464026935770946 | 0.4928108580272763 |
| 0.3303837023031519 | 0.5440554328732716 | 0.1952296407618306 |
| 0.3588814124821198 | 0.5531166251311745 | 0.9813468766940403 |
| 0.3918510017386367 | 0.5146251898210963 | 0.9136689960241426 |
| 0.3938521399045314 | 0.4639133152507426 | 0.0462598701727117 |
| 0.3604534366490455 | 0.4513061777386227 | 0.2507371291482130 |
| 0.3291220808985926 | 0.4896778913610262 | 0.3241066413199505 |
| 0.3540542329291441 | 0.6012238593781234 | 0.8222874276419674 |
| 0.5549354083868394 | 0.7532729063236658 | 0.2091994095098926 |
| 0.5297803408290918 | 0.7180645343763317 | 0.9873634222119563 |
| 0.7980860892437391 | 0.4808075760634054 | 0.4937349402526294 |
| 0.8161811759380555 | 0.4696697363983944 | 0.7055946226314873 |
| 0.8898445209959291 | 0.5070855401410483 | 0.7739274657308215 |
| 0.9457635366684300 | 0.5583115448357105 | 0.6429119384787398 |
| 0.9261897617677803 | 0.5723602753281298 | 0.4399232989768080 |
| 0.8542305908616825 | 0.5349097298852286 | 0.3658074076588562 |
| 0.7598911514190334 | 0.4236581787885854 | 0.8663816708843868 |
| 0.6301434787765530 | 0.1978587304403590 | 0.1601373564762270 |
| 0.6001941918548610 | 0.1796124962664507 | 0.3719525842395157 |
| 0.5658703668627680 | 0.1082336731495488 | 0.4414163192882370 |
| 0.5643465688349778 | 0.0548645123587477 | 0.3122306260387475 |
| 0.5989803348158560 | 0.0748133937198219 | 0.1096083683594031 |
| 0.6311014377289936 | 0.1443830888638189 | 0.0336320800415848 |
| 0.6086612089717605 | 0.2338879007771411 | 0.5323732915387396 |
| 0.5075702833748821 | 0.3584595290078099 | 0.8258668984464137 |
| 0.5195407601350510 | 0.3876217192950193 | 0.0378985438696233 |
| 0.4825366377816991 | 0.4222402241500234 | 0.1058526043474046 |
| 0.4308101929426513 | 0.4254735528686027 | 0.9743009286029789 |
| 0.4155924660956885 | 0.3917067803592289 | 0.7712574732655284 |
| 0.4526466131770874 | 0.3587504326578923 | 0.6975666531218891 |
| 0.5660102468107056 | 0.3789947932622582 | 0.1991056160042746 |
| 0.6453925696814764 | 0.8156051288339015 | 0.8157485385561714 |
| 0.6838590391734627 | 0.7726411039657251 | 0.8045550669390593 |
| 0.6714999928052023 | 0.8717691995192069 | 0.6365844483761620 |
| 0.5065795789508982 | 0.6586280068508330 | 0.3775363207688542 |
| 0.4654701054960526 | 0.9320751841526516 | 0.0966134367764866 |
| 0.5822822848894020 | 0.0082163579800820 | 0.6982631357875633 |
| 0.5187730015203940 | 0.8841440286348572 | 0.8379417327640866 |
| 0.0663874299666887 | 0.5762279108983108 | 0.4253454756429491 |

|                    |                    |                    |
|--------------------|--------------------|--------------------|
| 0.0003735761524055 | 0.6292521710232322 | 0.0207324726527531 |
| 0.1296070297448324 | 0.6890537251551550 | 0.1531368237049620 |
| 0.4167628372858729 | 0.5261910073588325 | 0.7536320973939539 |
| 0.3589785762164439 | 0.4098424718689557 | 0.3529272977819886 |
| 0.3030840118273233 | 0.4792496252690910 | 0.4822202767877997 |
| 0.5398086652132363 | 0.7962205927351533 | 0.7891165094808272 |
| 0.5522044681848399 | 0.8023979318840588 | 0.2139503723599887 |
| 0.6129862235632615 | 0.7696832371800539 | 0.2343739808279963 |
| 0.4706894767883227 | 0.6965169563462368 | 0.9724160384334439 |
| 0.5384915693568928 | 0.6725786454122016 | 0.9735908772582107 |
| 0.9022996896371893 | 0.4946079969663444 | 0.9330730334890234 |
| 0.9689164982984693 | 0.6140574232526461 | 0.3393307629671369 |
| 0.8395250122594646 | 0.5460381633972062 | 0.2081007195092184 |
| 0.5401533428022205 | 0.0955438392284194 | 0.6004308390499489 |
| 0.6010866315732883 | 0.0343681386681922 | 0.0112347342627217 |
| 0.6579075534362957 | 0.1594154786425719 | 0.8764127247560367 |
| 0.4958053231249764 | 0.4470610165423992 | 0.2654078367042629 |
| 0.3732199717337181 | 0.3912800606709581 | 0.6702821086306869 |
| 0.4404811770492998 | 0.3326738627547314 | 0.5400815618403101 |
| 0.5335284965666247 | 0.7290313919508122 | 0.5388147742086744 |
| 0.6611028051584782 | 0.8458114229611624 | 0.9708490534891610 |
| 0.6699259860942206 | 0.7421535164790569 | 0.6527494088686367 |
| 0.6680215338562761 | 0.7347223261167528 | 0.9391008439730797 |
| 0.7437704840211978 | 0.8086087498379655 | 0.8113902123515260 |
| 0.6674632257737727 | 0.8483320963055405 | 0.4759067018879577 |
| 0.7293697461255206 | 0.9130050808716916 | 0.6634204024548822 |
| 0.6393578098185273 | 0.8983522054979431 | 0.6333325107621732 |
| 0.5098277320764453 | 0.7071669270365462 | 0.3846281854255196 |
| 0.5644380230980559 | 0.7664934211093950 | 0.8036006681832149 |

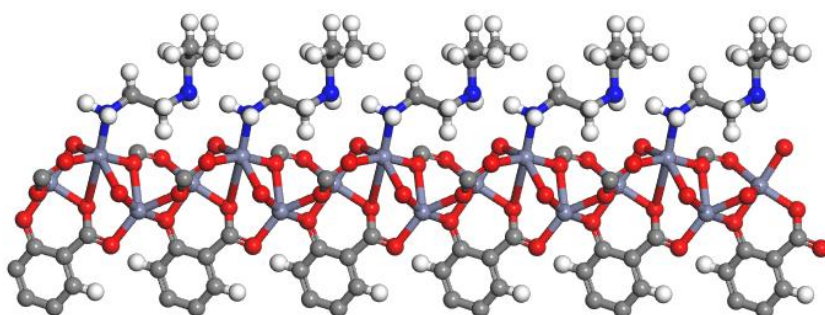

i-2-Zn<sub>2</sub>(dobpdc)

1.00000000000000

21.3373184182520639      0.0722714226981163      -0.0745044114151871

-11.2224393126178335      18.9509787453301861      0.0051848551949929

-0.0248716070613254      -0.0468879308870224      6.3911518809040446

Zn    O    C    H    N

6    18    47    32    2

Direct

0.3274108315839968    0.7315519303294877    0.7774318929456925

|                    |                    |                    |
|--------------------|--------------------|--------------------|
| 0.2705624092953514 | 0.6382673915205572 | 0.1490035632361639 |
| 0.4090353551320050 | 0.6872447728008595 | 0.4328622050362370 |
| 0.7021738009316536 | 0.3490141666881712 | 0.2342097451358995 |
| 0.5921090182297988 | 0.2860171445049104 | 0.8977508259793936 |
| 0.6376435879194773 | 0.3917370065005699 | 0.5668204130722074 |
| 0.4227750020636947 | 0.7713127230611434 | 0.6087248344040432 |
| 0.3797078069237259 | 0.7316939741353323 | 0.1908897466322870 |
| 0.3795068501572629 | 0.8137018746077516 | 0.9888688125027301 |
| 0.2361679108887103 | 0.6893020236195966 | 0.9524767901550248 |
| 0.2702049469644976 | 0.6931078545907710 | 0.5125406119574833 |
| 0.1839573003215520 | 0.6008755547237215 | 0.3391078570931185 |
| 0.3241956828535635 | 0.5964532253625379 | 0.2899986434065625 |
| 0.3183055513300417 | 0.6311647889085918 | 0.8638217888085080 |
| 0.4027788714528384 | 0.6245757586706944 | 0.6752323983526765 |
| 0.7312639759455450 | 0.4369384108997281 | 0.4114246407301962 |
| 0.6923575221030802 | 0.3953165746131617 | 0.8356604665327438 |
| 0.7821724384131130 | 0.3998323317853121 | 0.0274161865487770 |
| 0.6536552596909004 | 0.2577498714609874 | 0.0745680951961560 |
| 0.6499821852214680 | 0.2954354253280300 | 0.4995555529862017 |
| 0.5646300200962031 | 0.2081413974954245 | 0.6874045606155263 |
| 0.5459867627146124 | 0.3316824707565971 | 0.7388187475403996 |
| 0.5889041472944925 | 0.3357037537946184 | 0.1657270292525297 |
| 0.5852818493354306 | 0.4185319243114307 | 0.3570654925149981 |
| 0.4526382107332907 | 0.8366101844064175 | 0.5278349983856856 |
| 0.4402750961639015 | 0.8513892203308302 | 0.3191043059140952 |
| 0.4727459813957609 | 0.9216213697350426 | 0.2524652493509549 |
| 0.5197337294765063 | 0.9782809871851867 | 0.3807104279701221 |
| 0.5330034391784011 | 0.9630853884948465 | 0.5840658382174837 |
| 0.5003454252797965 | 0.8945605883309184 | 0.6561751315279380 |
| 0.3966894100331331 | 0.7962518592943013 | 0.1597195876457178 |
| 0.1681721693111697 | 0.6568438842317832 | 0.8719845450755628 |
| 0.1502669661562095 | 0.6283939557557687 | 0.6649975479529786 |
| 0.0770360958272320 | 0.5911098835263644 | 0.5996900403561938 |
| 0.0210757051746171 | 0.5842088381434820 | 0.7272683091328176 |
| 0.0398762529196617 | 0.6157555268945245 | 0.9270770824787888 |
| 0.1113269363592480 | 0.6510605165151730 | 0.9983797155484524 |
| 0.2045086592173035 | 0.6405467025460538 | 0.5019195462092227 |
| 0.3436340254717720 | 0.5532484552291308 | 0.1998712327264371 |
| 0.3670567089283665 | 0.5598774895127576 | 0.9887909440128624 |
| 0.3974906155382811 | 0.5200203892932223 | 0.9179047904562339 |
| 0.4015444384408582 | 0.4705551242182722 | 0.0441368978860268 |
| 0.3723576059381131 | 0.4602378735342967 | 0.2463678863282084 |
| 0.3437610008461718 | 0.5000589781610358 | 0.3226817043305772 |
| 0.3626089672486117 | 0.6082459200118038 | 0.8351210691001896 |
| 0.5580217958773517 | 0.7618273905341297 | 0.2090423439931683 |
| 0.5319529285532525 | 0.7255157262650869 | 0.9939683996393995 |

|                    |                    |                    |
|--------------------|--------------------|--------------------|
| 0.7986801950976457 | 0.4726376335705922 | 0.4988354757921201 |
| 0.8155834382400755 | 0.4610333559873325 | 0.7053843723873996 |
| 0.8885323637864460 | 0.4971523841010566 | 0.7751797557288072 |
| 0.9447302779452755 | 0.5464783677959062 | 0.6515738774280422 |
| 0.9263684688981542 | 0.5600197714816915 | 0.4521912101710370 |
| 0.8553761457963773 | 0.5242294194504851 | 0.3771000071282344 |
| 0.7607304954761247 | 0.4156581143203724 | 0.8605901223810122 |
| 0.6236233392523971 | 0.1928289965534162 | 0.1585418520002122 |
| 0.5945611752361941 | 0.1761649319620560 | 0.3639780772778991 |
| 0.5595361161881769 | 0.1057376399519470 | 0.4306640838816094 |
| 0.5553896483535326 | 0.0517367910468707 | 0.3057187267197250 |
| 0.5880006716218489 | 0.0698153212602861 | 0.1078077632147938 |
| 0.6211165035720470 | 0.1383165705114848 | 0.0351325773566131 |
| 0.6024709176435579 | 0.2292021132977382 | 0.5217855381647993 |
| 0.5102423281863508 | 0.3618159836937807 | 0.8234039415162044 |
| 0.5228270743076635 | 0.3901661658061215 | 0.0302466926458465 |
| 0.4870143035424874 | 0.4256621110594736 | 0.0966451462639384 |
| 0.4368685174723979 | 0.4314850098939047 | 0.9699286715603321 |
| 0.4217847285551954 | 0.3994040360542783 | 0.7707186695543840 |
| 0.4573693833623480 | 0.3654782189057215 | 0.6987249557158748 |
| 0.5688390308955036 | 0.3819068154371408 | 0.1891471021793194 |
| 0.6437681856073141 | 0.8214229179858350 | 0.8213409802260898 |
| 0.6840020135103160 | 0.7806101094709987 | 0.8069374346745164 |
| 0.6664262906654344 | 0.8760298932678339 | 0.6477034880044670 |
| 0.5184504384936943 | 0.6697474155445491 | 0.3748994671335808 |
| 0.4593811645440908 | 0.9304797368833349 | 0.0947313844022943 |
| 0.5705224639313471 | 0.0063822582755648 | 0.6863000266608523 |
| 0.5105807967650478 | 0.8841374565848383 | 0.8158189355012553 |
| 0.0652684684155389 | 0.5677437015193902 | 0.4432011296703990 |
| 0.9972600434111953 | 0.6131692519610112 | 0.0266847373355290 |
| 0.1254065897696393 | 0.6758978555489463 | 0.1527689575578535 |
| 0.4192628134279417 | 0.5299356299828730 | 0.7599071767833578 |
| 0.3723543054916973 | 0.4198437591908828 | 0.3447659090523771 |
| 0.3213966319943395 | 0.4918913796625830 | 0.4796682278007012 |
| 0.5378450129528574 | 0.7995938226840380 | 0.7940599663430561 |
| 0.5517756578167763 | 0.8084528032794509 | 0.2161860229160197 |
| 0.6162343610992167 | 0.7803340217913117 | 0.2297186135390206 |
| 0.4731403099480644 | 0.7034842669879495 | 0.9819392582051378 |
| 0.5415178642544944 | 0.6809654412007546 | 0.9826018903829734 |
| 0.9000151969431940 | 0.4850117088303989 | 0.9310351260912952 |
| 0.9691628682567028 | 0.6001493426043538 | 0.3555961046886722 |
| 0.8417339151786223 | 0.5352858608818920 | 0.2225899293610922 |
| 0.5352836958845515 | 0.0945128740041312 | 0.5855820790807300 |
| 0.5879771048117206 | 0.0288912856852264 | 0.0108232922956759 |
| 0.6466470313998869 | 0.1518928500733026 | 0.8820470095151478 |
| 0.5001780273422085 | 0.4491812755729825 | 0.2529197638126135 |

|                    |                    |                    |
|--------------------|--------------------|--------------------|
| 0.3805815069914757 | 0.4007484276526441 | 0.6718599951219417 |
| 0.4451184815483842 | 0.3405306774365826 | 0.5444686989500909 |
| 0.5398005727535278 | 0.7376188228377458 | 0.5323863343894786 |
| 0.6596784001496303 | 0.8515561156068898 | 0.9711138008827476 |
| 0.6703094686436373 | 0.7507833620949711 | 0.6588447820159899 |
| 0.6700478472275151 | 0.7431397833185116 | 0.9356617931013957 |
| 0.7430595446596158 | 0.8168883634092481 | 0.8130049642074866 |
| 0.6615139905119420 | 0.8525435281382201 | 0.4919235412276421 |
| 0.7235301947380250 | 0.9173001518541284 | 0.6705998344191499 |
| 0.6333941687897422 | 0.9014110414213476 | 0.6474948094137360 |
| 0.5168254667607144 | 0.7154632644951135 | 0.3826707920738670 |
| 0.5639729219479719 | 0.7716212854980782 | 0.8119365842188202 |

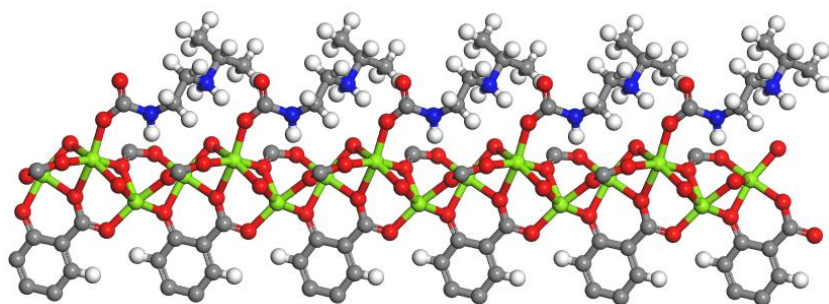

experimental-CO<sub>2</sub>-i-2-Mg<sub>2</sub>(dobpdc)

1.0000000000000000

|                      |                     |                    |
|----------------------|---------------------|--------------------|
| 20.6155779842898106  | -0.2232575360820054 | 0.0904183710540717 |
| -11.2954971212902411 | 19.1102665748759826 | 0.0140227017691462 |
| -0.0536647964826460  | -0.0066695584457494 | 6.8433109323161103 |

| Mg | O  | C  | H  | N |
|----|----|----|----|---|
| 6  | 20 | 48 | 32 | 2 |

Direct

|                    |                    |                    |
|--------------------|--------------------|--------------------|
| 0.3427948848108926 | 0.7464173943161825 | 0.8215811960446118 |
| 0.2734714221635670 | 0.6556341147395557 | 0.1640275978908150 |
| 0.3891845962600371 | 0.6887825707381765 | 0.4752375130222575 |
| 0.6906639976197297 | 0.3604170690847894 | 0.2183212143246536 |
| 0.5895380612893817 | 0.2922225156322469 | 0.8846079221983629 |
| 0.6192409717387761 | 0.3853082449314726 | 0.5508042517669480 |
| 0.4286760832595533 | 0.7847687365030609 | 0.6279070834053115 |
| 0.3676201663108785 | 0.7428632026180964 | 0.2628620952572760 |
| 0.4002194210766987 | 0.8229896653802200 | 0.0278913193094823 |
| 0.2413360562286542 | 0.7012820122575079 | 0.9580178289646497 |
| 0.2844827288444591 | 0.6847168408458728 | 0.5913550801153562 |
| 0.1940494238182850 | 0.6317692272467923 | 0.3653072577588858 |
| 0.3208628690147748 | 0.6055170158882106 | 0.2887524505252017 |
| 0.3417754981054912 | 0.6617405208536340 | 0.9351509569873144 |
| 0.3817684836317099 | 0.6221764422828215 | 0.6933756129191906 |
| 0.4979205120232280 | 0.7221071751021384 | 0.3986707620303989 |
| 0.6058995880029343 | 0.7313098282054895 | 0.2873037225357180 |
| 0.7224299000387759 | 0.4374602151165021 | 0.4189096562005759 |

|                    |                    |                    |
|--------------------|--------------------|--------------------|
| 0.6812307475033563 | 0.3820821027101147 | 0.7810208833370140 |
| 0.7695368102683418 | 0.4147872369057453 | 0.0121118711258674 |
| 0.6422275740484622 | 0.2644917894848007 | 0.0867106313231929 |
| 0.6232572136287260 | 0.3012200351201315 | 0.4479772401565967 |
| 0.5689796756763812 | 0.2189311433408250 | 0.6791493321543740 |
| 0.5348006726895207 | 0.3357311458642087 | 0.7504487433544185 |
| 0.5944071737349006 | 0.3532119453591918 | 0.1139978272665871 |
| 0.5635106116393587 | 0.4051384878589133 | 0.3423117968262375 |
| 0.4601904406990869 | 0.8493143625127288 | 0.5490310357994730 |
| 0.4527108236496815 | 0.8630725374806545 | 0.3478095258355083 |
| 0.4874103180193501 | 0.9328698253569101 | 0.2811487757094326 |
| 0.5301945787758697 | 0.9909018693359783 | 0.4018002590813836 |
| 0.5380119053413281 | 0.9770128765752659 | 0.5989170436806290 |
| 0.5044121773254133 | 0.9087224537198324 | 0.6700293510126940 |
| 0.4049721325503555 | 0.8073141339682763 | 0.2043698419210713 |
| 0.1718043654926618 | 0.6711462303003088 | 0.8776365704557207 |
| 0.1560590941192785 | 0.6479694565106868 | 0.6792689758145372 |
| 0.0809125135944342 | 0.6139527084747485 | 0.6108190492885512 |
| 0.0204375358442306 | 0.6025475663714559 | 0.7281119975517925 |
| 0.0371348878310158 | 0.6279001075026898 | 0.9215019215330997 |
| 0.1104986927698590 | 0.6613199856599579 | 0.9941923345227082 |
| 0.2143768512438129 | 0.6549584017561401 | 0.5386952890946759 |
| 0.3380250951779331 | 0.5612148335721301 | 0.2056948885669456 |
| 0.3554818252288143 | 0.5633278393831418 | 0.0021218904822646 |
| 0.3792653610111358 | 0.5187158813612882 | 0.9294336803888541 |
| 0.3849436524804446 | 0.4705585620489785 | 0.0479631668035339 |
| 0.3632777532429188 | 0.4660907618179166 | 0.2457336927006395 |
| 0.3404435994390838 | 0.5097010686561845 | 0.3224345690411639 |
| 0.3588355674680415 | 0.6170182377558433 | 0.8675222833080625 |
| 0.5423323877610713 | 0.7236654106491400 | 0.2582485067929952 |
| 0.5474432201771080 | 0.7010470926226233 | 0.9071039083732089 |
| 0.6176542033787484 | 0.7621977004428544 | 0.8124556616064993 |
| 0.7913792863556850 | 0.4776680231320896 | 0.5002954690122081 |
| 0.8080555048985048 | 0.4715889793764916 | 0.7002028374959721 |
| 0.8826987390900527 | 0.5135587499088388 | 0.7702141713636550 |
| 0.9418626622304203 | 0.5624945947791673 | 0.6529073058058401 |
| 0.9241284776385896 | 0.5697152859272521 | 0.4581295602574897 |
| 0.8513525271836713 | 0.5287768049063288 | 0.3839164571913258 |
| 0.7510120768857718 | 0.4206248432342505 | 0.8385597221847050 |
| 0.6181069259034402 | 0.2014732544303683 | 0.1696990690114717 |
| 0.5941016357911835 | 0.1851579618903045 | 0.3692034299010061 |
| 0.5663333211886865 | 0.1165883520464348 | 0.4404210734825043 |
| 0.5629215284988689 | 0.0632997636809733 | 0.3255879143408791 |
| 0.5894689562539597 | 0.0807947907295414 | 0.1316657032266306 |
| 0.6159883851266557 | 0.1474787471601289 | 0.0556927552450333 |
| 0.5947790145439882 | 0.2368776443761789 | 0.5063733955589740 |

|                    |                    |                    |
|--------------------|--------------------|--------------------|
| 0.4966372564135781 | 0.3638930324462777 | 0.8293105078307192 |
| 0.5053889031530403 | 0.3870977298524565 | 0.0277580764172285 |
| 0.4669480324587028 | 0.4200704480532096 | 0.0936700474289509 |
| 0.4185615501763849 | 0.4302440528284492 | 0.9743632642529434 |
| 0.4076190105037512 | 0.4043034531987644 | 0.7816485061587031 |
| 0.4452603120224481 | 0.3721147660595960 | 0.7112554961964932 |
| 0.5565701703827415 | 0.3819843543876758 | 0.1689771508927151 |
| 0.6685523881896387 | 0.8641073722197419 | 0.5755602027179805 |
| 0.6452987707053452 | 0.8948534651175422 | 0.4089205595368099 |
| 0.7197217003848451 | 0.9206923533749958 | 0.7223980332705295 |
| 0.4772427062666793 | 0.9404002404701757 | 0.1290562961108890 |
| 0.5720164065287321 | 0.0210172641427135 | 0.6974831694941628 |
| 0.5101111556280173 | 0.8989996132326965 | 0.8240017907490085 |
| 0.0709838086994168 | 0.5944006074838555 | 0.4611998183195070 |
| 0.9913037379366898 | 0.6215776172767065 | 0.0155959159487367 |
| 0.1228100920366018 | 0.6805361487211954 | 0.1442811051104016 |
| 0.3968202782688337 | 0.5255170327553245 | 0.7767582775710835 |
| 0.3648946807330233 | 0.4272008677172394 | 0.3405311784456870 |
| 0.3247851165087212 | 0.5064904481499255 | 0.4759659390187636 |
| 0.5638061422077740 | 0.6639033217584185 | 0.9603780818558150 |
| 0.6456002076205110 | 0.7415629776537713 | 0.7217191997302805 |
| 0.8934152204129830 | 0.5048908911387855 | 0.9208359786557381 |
| 0.9688938149477835 | 0.6089523339370118 | 0.3639396101627312 |
| 0.8385378921884268 | 0.5348360460568955 | 0.2328136147256075 |
| 0.5453243183934759 | 0.1058563182214769 | 0.5902561175775389 |
| 0.5896535409350392 | 0.0408110356351941 | 0.0394988572039381 |
| 0.6361429930091873 | 0.1602374735839618 | 0.9052761141879557 |
| 0.4786960078722160 | 0.4401934534430936 | 0.2427294717838464 |
| 0.3683122353756545 | 0.4094425953035241 | 0.6856170409568350 |
| 0.4365790721316785 | 0.3528047088173167 | 0.5613576761454979 |
| 0.5031787015084035 | 0.6737428402645307 | 0.7955610733675513 |
| 0.5598473209792587 | 0.7695336923718870 | 0.5668703955372862 |
| 0.5705880662996350 | 0.8240672377940754 | 0.7500604278303484 |
| 0.6571402856486159 | 0.7969325490271544 | 0.9250082796950565 |
| 0.4615891870391877 | 0.7085405131889360 | 0.0570009480059852 |
| 0.6194300642284247 | 0.9240061397432413 | 0.4634783588719600 |
| 0.6056489792416357 | 0.8542165433911677 | 0.3076676670793148 |
| 0.6963954976286004 | 0.9318576736173441 | 0.3262289994187810 |
| 0.6967432600160350 | 0.8379209745158107 | 0.5134999858687692 |
| 0.7684843836629369 | 0.9634995164260900 | 0.6448584776279347 |
| 0.7419060449663490 | 0.9012308272971197 | 0.8362689436034074 |
| 0.6893656278565032 | 0.9435544882799221 | 0.7928034309776422 |
| 0.5161414309408272 | 0.7206597622448854 | 0.0685796848832396 |
| 0.5993605652536189 | 0.8046107039990389 | 0.6763412825311903 |



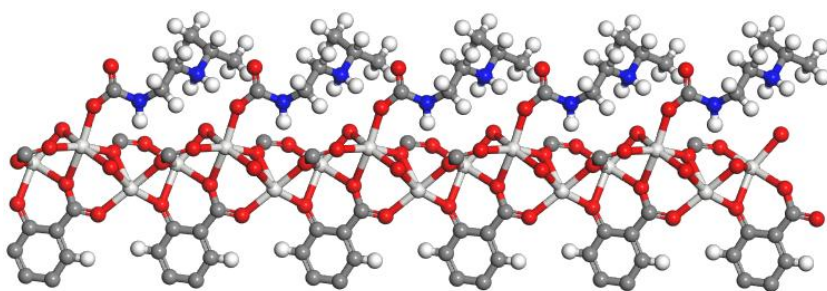

experimental-CO<sub>2</sub>-i-2-Sc<sub>2</sub>(dobpdc)

1.0000000000000000

|                      |                     |                    |
|----------------------|---------------------|--------------------|
| 20.8532416605149500  | -0.3321763867010240 | 0.2770573892022836 |
| -11.5220950549351322 | 19.4529990377284570 | 0.2061846355415068 |
| 0.0069393118376872   | 0.0978963272974585  | 7.2423285440284424 |

|    |    |    |    |   |
|----|----|----|----|---|
| Sc | O  | C  | H  | N |
| 6  | 20 | 48 | 32 | 2 |

Direct

|                    |                    |                    |
|--------------------|--------------------|--------------------|
| 0.3500505175996835 | 0.7603840584462915 | 0.8291737600564559 |
| 0.2731969285434630 | 0.6605634076153066 | 0.1486724427989543 |
| 0.3886086812192744 | 0.6848447613368265 | 0.4820041842929186 |
| 0.6934144019473081 | 0.3631197584605843 | 0.2124834952831876 |
| 0.5853092611898632 | 0.2854039675932256 | 0.8844462742771100 |
| 0.6138861918226155 | 0.3849727329642150 | 0.5455447019854205 |
| 0.4425446691174244 | 0.7829405225580999 | 0.6197695768076983 |
| 0.3783362608739438 | 0.7445531940211865 | 0.2678294082862891 |
| 0.4111541340601050 | 0.8292599484004342 | 0.0526821779876556 |
| 0.2342827942853845 | 0.7047186851597971 | 0.9431988399375584 |
| 0.2872801158844780 | 0.6905263294821538 | 0.5982669193423291 |
| 0.2004708876424814 | 0.6436652164160961 | 0.3799841910474910 |
| 0.3236549625052447 | 0.6061650596698342 | 0.2800005297685004 |
| 0.3440595922989687 | 0.6618047328685961 | 0.9263732401252369 |
| 0.3768460366924060 | 0.6152934419373395 | 0.7003964630400219 |
| 0.4999765188505094 | 0.7144595048043456 | 0.3902578932286858 |
| 0.6091465224577775 | 0.7338785561045285 | 0.2631902077121282 |
| 0.7294983397916823 | 0.4436744958626662 | 0.4197723325536060 |
| 0.6823436467888513 | 0.3922469355839979 | 0.7788664212612133 |
| 0.7715193805874989 | 0.4271439774182113 | 0.9891700843183955 |
| 0.6414952809772458 | 0.2581339903384574 | 0.0999596470315964 |
| 0.6307355136320183 | 0.2972573632209574 | 0.4531293517978767 |
| 0.5763342729838143 | 0.2134794289661741 | 0.6732160638378630 |
| 0.5240811335570541 | 0.3328454058849033 | 0.7649877837005121 |
| 0.5789812557969896 | 0.3421840851875970 | 0.1174290172697710 |
| 0.5496813221616534 | 0.3961868238008535 | 0.3267488822945666 |
| 0.4661695582912913 | 0.8481128648620242 | 0.5476080667337797 |
| 0.4578760038193934 | 0.8626548312097029 | 0.3569898816445374 |
| 0.4917003685541701 | 0.9334603034398725 | 0.2992886209862249 |
| 0.5315929145517018 | 0.9888335306661773 | 0.4148425002328864 |
| 0.5372575298808258 | 0.9734893299861369 | 0.6020211832426057 |

|                    |                    |                    |
|--------------------|--------------------|--------------------|
| 0.5047815339424631 | 0.9044807944566102 | 0.6647699400929099 |
| 0.4159258191040323 | 0.8119717083040285 | 0.2216856638155136 |
| 0.1668863358212249 | 0.6749411651036610 | 0.8616670316207689 |
| 0.1573970443337558 | 0.6553139638084460 | 0.6725656589975486 |
| 0.0835601448988612 | 0.6218330734678759 | 0.6038111180956207 |
| 0.0210021594133138 | 0.6079490992719698 | 0.7106322396798177 |
| 0.0325394255665969 | 0.6299157371748692 | 0.8952765374546345 |
| 0.1038216557985123 | 0.6625088047242471 | 0.9680596542532101 |
| 0.2170231510818894 | 0.6635137805826190 | 0.5466811300598096 |
| 0.3420378438564740 | 0.5626864200745629 | 0.2007874761407962 |
| 0.3568572386331681 | 0.5644209010087877 | 0.0047875285463945 |
| 0.3787025802040489 | 0.5185835639778915 | 0.9387359363562311 |
| 0.3855799798550947 | 0.4723459395073704 | 0.0537728645715703 |
| 0.3676943517094315 | 0.4699099333393377 | 0.2440115883648843 |
| 0.3468215994164652 | 0.5143583952944510 | 0.3145864285989788 |
| 0.3577845107497239 | 0.6137402401558418 | 0.8727864697942067 |
| 0.5440674035603763 | 0.7215415241241914 | 0.2467060432828845 |
| 0.5448073857623115 | 0.7005114397130683 | 0.9142355813447125 |
| 0.6140093932109920 | 0.7619658640184781 | 0.8172991892314556 |
| 0.7971688566552970 | 0.4833026155270446 | 0.4950089835025508 |
| 0.8101618595289679 | 0.4792765649504176 | 0.6876588456915158 |
| 0.8840086292662548 | 0.5216741431163214 | 0.7511479498599911 |
| 0.9445343741777350 | 0.5677687216637750 | 0.6364150848743648 |
| 0.9302822590092603 | 0.5718675380990419 | 0.4474983291758292 |
| 0.8587919498895076 | 0.5307532865507980 | 0.3794297417173098 |
| 0.7531515044524824 | 0.4315271972518815 | 0.8235569487375898 |
| 0.6183592204197979 | 0.1963654299095481 | 0.1840236620474727 |
| 0.5985645612040003 | 0.1817450063589519 | 0.3775149667063360 |
| 0.5712567711016163 | 0.1136086935059026 | 0.4484231071132356 |
| 0.5642113635512800 | 0.0605645501688770 | 0.3400012922774565 |
| 0.5869144626674583 | 0.0770220656623124 | 0.1514074649245671 |
| 0.6126676076678450 | 0.1426371012482832 | 0.0760245594282338 |
| 0.6016304954148595 | 0.2320380937218616 | 0.5064312364697301 |
| 0.4886880023981988 | 0.3622912088884078 | 0.8414970307847440 |
| 0.4961355781100423 | 0.3818512454464482 | 0.0308241701898098 |
| 0.4599217448759276 | 0.4161069332323564 | 0.0935300809521635 |
| 0.4164002667661748 | 0.4311997127884766 | 0.9815530097359968 |
| 0.4075303578476976 | 0.4093751973325581 | 0.7970159935664611 |
| 0.4426777578564369 | 0.3761027890391802 | 0.7296455396172661 |
| 0.5428432721331617 | 0.3730909408397167 | 0.1634757903923045 |
| 0.6659950150345821 | 0.8599297617319692 | 0.5749921544183678 |
| 0.6435226208265874 | 0.8896887405588600 | 0.4151956922988873 |
| 0.7130150172980336 | 0.9155344344882081 | 0.7128081667391868 |
| 0.4830055675053160 | 0.9430029154538886 | 0.1565584272646490 |
| 0.5680321659302123 | 0.0151829433089148 | 0.6979121264895909 |
| 0.5105987212315526 | 0.8933443133578365 | 0.8092243363655385 |

|                    |                    |                    |
|--------------------|--------------------|--------------------|
| 0.0765810981283295 | 0.6041948163510398 | 0.4625145026439057 |
| 0.9849737637564360 | 0.6215784119765360 | 0.9814054251349731 |
| 0.1129165851780343 | 0.6795144726144215 | 0.1105239318186335 |
| 0.3937753505496104 | 0.5232997376527422 | 0.7921528013435193 |
| 0.3701114916413175 | 0.4326723321032659 | 0.3372347571553647 |
| 0.3339299816385974 | 0.5129228400191153 | 0.4619153601004911 |
| 0.5616764692279261 | 0.6639517718092165 | 0.9594604888165037 |
| 0.6470216046676143 | 0.7436177311523622 | 0.7467388342434091 |
| 0.8927144978055424 | 0.5153035449874821 | 0.8964463713671265 |
| 0.9761654129710848 | 0.6084454906626533 | 0.3537848501952610 |
| 0.8482092832624701 | 0.5341719116340400 | 0.2334172158330858 |
| 0.5534460090707043 | 0.1033109921104867 | 0.5937418715945242 |
| 0.5846056642313684 | 0.0373574619234205 | 0.0634834342029365 |
| 0.6294734957796990 | 0.1546308532567195 | 0.9300244502770454 |
| 0.4699666697510807 | 0.4333070211893002 | 0.2353056246378316 |
| 0.3720697190293762 | 0.4184062173683003 | 0.7057042074387212 |
| 0.4356925799511231 | 0.3598156070254035 | 0.5866292406951530 |
| 0.4996679069511742 | 0.6733160345188551 | 0.8153225488392195 |
| 0.5641083731951468 | 0.7634027974225432 | 0.5661977494534085 |
| 0.5616356547641246 | 0.8147218276619554 | 0.7214318273062190 |
| 0.6490917002613870 | 0.7995377877853187 | 0.9197551015823535 |
| 0.4593588536230797 | 0.7026748154747580 | 0.0714085264510231 |
| 0.6176375638201961 | 0.9181793652250434 | 0.4649977989481542 |
| 0.6046889549234820 | 0.8494869630925805 | 0.3229227622267530 |
| 0.6945573755858732 | 0.9263080661694474 | 0.3337760563163314 |
| 0.6966764801347480 | 0.8364041694705620 | 0.5196704692608023 |
| 0.7603745814730871 | 0.9599151225130669 | 0.6376161213407059 |
| 0.7365686672965239 | 0.8980027749194832 | 0.8199176241839581 |
| 0.6796952419698812 | 0.9345411538061796 | 0.7795659147376739 |
| 0.5145273393085716 | 0.7176681663742741 | 0.0735252834484612 |
| 0.5964371769482710 | 0.7988178681527316 | 0.6695819178803433 |

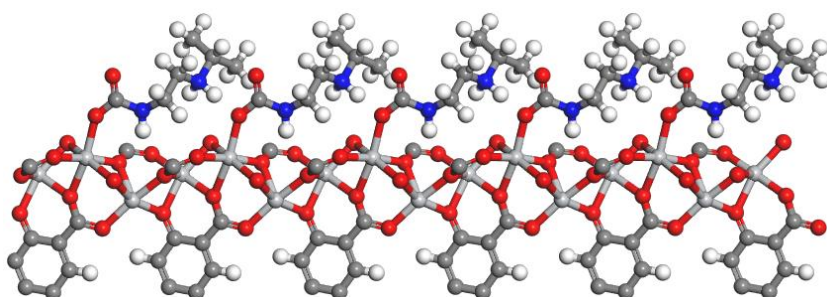

experimental-CO<sub>2</sub>-i-2-Ti<sub>2</sub>(dobpdc)

1.0000000000000000

20.8512534795163340 -0.3080885035130459 0.1397536346727732

-11.5134142140380114 19.0947191395553446 -0.0370565159025508

-0.0463367895023305 -0.0163675600150085 7.0592293945990061

Ti O C H N

6 20 48 32 2

Direct

|                    |                    |                    |
|--------------------|--------------------|--------------------|
| 0.3472518708267387 | 0.7503544674102116 | 0.8222627266252758 |
| 0.2693496265832280 | 0.6544640526904004 | 0.1619108524222312 |
| 0.3852196345061429 | 0.6860098276312883 | 0.4839196506954124 |
| 0.6950869389806655 | 0.3677835871083062 | 0.2046913654037112 |
| 0.5878046270487474 | 0.2903333634615919 | 0.8703463232587083 |
| 0.6157019775922521 | 0.3896111965908347 | 0.5378034916857501 |
| 0.4333501873365364 | 0.7885341513611124 | 0.6192870246365487 |
| 0.3761959395248766 | 0.7433077613956982 | 0.2601923294948918 |
| 0.4068778447831676 | 0.8246419637256608 | 0.0353066147728569 |
| 0.2386666680567444 | 0.7015479394868294 | 0.9517638806044744 |
| 0.2816157331396880 | 0.6814754260282783 | 0.5979365057687360 |
| 0.1932003656393846 | 0.6381752415723980 | 0.3719860960186949 |
| 0.3165494067578436 | 0.5999512876552586 | 0.2844754157938709 |
| 0.3354326323859596 | 0.6557397395427174 | 0.9343697830231150 |
| 0.3808383555393888 | 0.6199030293867835 | 0.7042318431035213 |
| 0.4993630342328856 | 0.7158591754562096 | 0.4137001544533376 |
| 0.6066869187509241 | 0.7296415260827445 | 0.2921575257326552 |
| 0.7264610491269323 | 0.4468563288400276 | 0.4111942047778001 |
| 0.6821948666158306 | 0.3897740557495624 | 0.7646650489001061 |
| 0.7707835162730703 | 0.4233862320591015 | 0.9878525755670609 |
| 0.6427608906760227 | 0.2645848617622875 | 0.0770376419825425 |
| 0.6256482445371532 | 0.3036436641069002 | 0.4307787354696302 |
| 0.5712555166855040 | 0.2202123244075764 | 0.6538332750043523 |
| 0.5298220872234083 | 0.3368182544162792 | 0.7431173521227166 |
| 0.5903583745852927 | 0.3536589721768806 | 0.0975573835433678 |
| 0.5594310734331813 | 0.4053890717466473 | 0.3194570955295717 |
| 0.4657259839313141 | 0.8536047835774880 | 0.5404485976511779 |
| 0.4602424777902243 | 0.8652111856988256 | 0.3428014851786756 |
| 0.4965449469103973 | 0.9354760247141343 | 0.2767375789660562 |
| 0.5372561713324515 | 0.9940608839184364 | 0.3939451747786435 |
| 0.5418545613108137 | 0.9814610390222498 | 0.5881799704087882 |
| 0.5067190130838739 | 0.9130509547292149 | 0.6588361127979780 |
| 0.4138451613890837 | 0.8094381607443495 | 0.2072060178310409 |
| 0.1698994397487041 | 0.6735848650052674 | 0.8715210596842340 |
| 0.1558066923480297 | 0.6533359704775066 | 0.6764881373306579 |
| 0.0813206815387204 | 0.6225139156117336 | 0.6074539242915762 |
| 0.0213578002744583 | 0.6112089630276216 | 0.7208550166999572 |
| 0.0370509454317514 | 0.6334131527597080 | 0.9118598314442607 |
| 0.1094510917706017 | 0.6638817022520058 | 0.9848743749112003 |
| 0.2123654532765329 | 0.6579650716823053 | 0.5445545021418638 |
| 0.3339904983415423 | 0.5562518614644603 | 0.2003147207061104 |
| 0.3515579880215327 | 0.5594976923185087 | 0.0023213938573790 |
| 0.3745638929578092 | 0.5147099834311817 | 0.9312421517091636 |
| 0.3801332848457832 | 0.4666516243750820 | 0.0448590346092885 |
| 0.3593369682592140 | 0.4620072489454188 | 0.2373807969092709 |

|                    |                    |                    |
|--------------------|--------------------|--------------------|
| 0.3368155911982740 | 0.5053994004519780 | 0.3125115059352979 |
| 0.3549693929538620 | 0.6123690429668329 | 0.8725365183185971 |
| 0.5423226609974634 | 0.7195173321400077 | 0.2711716724954485 |
| 0.5420992951517718 | 0.6938968420815286 | 0.9309972193203038 |
| 0.6128075908128920 | 0.7540687109175011 | 0.8365034693752307 |
| 0.7948560740099921 | 0.4875551442809751 | 0.4931052750162479 |
| 0.8092839102129190 | 0.4810842707437288 | 0.6879372475156273 |
| 0.8835727649784886 | 0.5238122692135931 | 0.7575856391486440 |
| 0.9435049754542391 | 0.5725122821809236 | 0.6450355539644619 |
| 0.9276075354040998 | 0.5795861086415428 | 0.4546488445958872 |
| 0.8553286176156334 | 0.5382865631492066 | 0.3809928763272410 |
| 0.7522640076416991 | 0.4296632523589992 | 0.8185685316674878 |
| 0.6208201439947771 | 0.2022837558900292 | 0.1609506930631639 |
| 0.5985306214861481 | 0.1876579180776048 | 0.3557921548103451 |
| 0.5728625307307240 | 0.1195045991608907 | 0.4270554148860555 |
| 0.5696948923951339 | 0.0661303784428711 | 0.3171076802655932 |
| 0.5945674441846052 | 0.0825437894501704 | 0.1272263988905067 |
| 0.6191436132777781 | 0.1486095557618441 | 0.0513905161401382 |
| 0.5980648715334240 | 0.2386851852241278 | 0.4852059704997274 |
| 0.4916134815167723 | 0.3638841892374955 | 0.8231915003141523 |
| 0.5002648556383562 | 0.3852942776123882 | 0.0173601679997617 |
| 0.4609869923708345 | 0.4165729974453427 | 0.0842879146489608 |
| 0.4134281318277218 | 0.4271530700831718 | 0.9700235513069231 |
| 0.4036431283767286 | 0.4035608086520028 | 0.7804704333526047 |
| 0.4415973617696238 | 0.3727376762403338 | 0.7093786304556886 |
| 0.5516360264977322 | 0.3812224752268847 | 0.1501001489446665 |
| 0.6675109524340712 | 0.8546937578882918 | 0.6007819964986680 |
| 0.6462997008549323 | 0.8889979611733736 | 0.4465576394410249 |
| 0.7215835997766291 | 0.9092247800509128 | 0.7444533609695370 |
| 0.4884180262310096 | 0.9426156177097695 | 0.1278942187927328 |
| 0.5737620547501336 | 0.0259655622281159 | 0.6844497742231894 |
| 0.5097052151952397 | 0.9037311608129315 | 0.8097048909890745 |
| 0.0713083185040020 | 0.6044434741543370 | 0.4609020154486672 |
| 0.9915311051746443 | 0.6268106996310223 | 0.0033467911497027 |
| 0.1214164914903293 | 0.6808094119405084 | 0.1325775672632901 |
| 0.3919656892466961 | 0.5215992038057280 | 0.7830986005268485 |
| 0.3612988941389901 | 0.4235783157513566 | 0.3290419590470250 |
| 0.3218314362467467 | 0.5023095441884351 | 0.4619592602888503 |
| 0.5567284979695231 | 0.6557821270175026 | 0.9805632173137226 |
| 0.6406878951826585 | 0.7323461951726458 | 0.7545053241685125 |
| 0.8934828956301075 | 0.5152462539634257 | 0.9039127791283335 |
| 0.9730345884822214 | 0.6184959216908439 | 0.3638182933454388 |
| 0.8434728853242817 | 0.5438127137363438 | 0.2335243186367251 |
| 0.5526507870502542 | 0.1090170497949146 | 0.5729264569055204 |
| 0.5948151553804735 | 0.0425679170192197 | 0.0383865822829463 |
| 0.6378611752899701 | 0.1608301184620373 | 0.9042790252631434 |

|                    |                    |                    |
|--------------------|--------------------|--------------------|
| 0.4719827328872483 | 0.4356771136024804 | 0.2299243339658332 |
| 0.3653781135651144 | 0.4094829229053758 | 0.6879489104388696 |
| 0.4340547555068355 | 0.3550118453757065 | 0.5623507476668053 |
| 0.4969599988068438 | 0.6668300055839964 | 0.8252290302874528 |
| 0.5591718204045222 | 0.7606502044782530 | 0.5881947419608338 |
| 0.5683464776034413 | 0.8159322046213617 | 0.7629079236330725 |
| 0.6518175206329246 | 0.7899811582022949 | 0.9448775282696715 |
| 0.4584800244731468 | 0.7007406815189796 | 0.0846998432087460 |
| 0.6252282194325218 | 0.9207818033590556 | 0.5067942677563053 |
| 0.6035387430373333 | 0.8499771242765206 | 0.3497081696758357 |
| 0.6971145013408560 | 0.9243741589808181 | 0.3632080330573402 |
| 0.6922280421059028 | 0.8269095058829592 | 0.5338766247872755 |
| 0.7700402218637592 | 0.9523083729954251 | 0.6684073871515182 |
| 0.7437348953420440 | 0.8878016554842389 | 0.8472626604136480 |
| 0.6941361964360553 | 0.9325957962714924 | 0.8220131311543213 |
| 0.5134294641640054 | 0.7149205797321514 | 0.0900290832103536 |
| 0.5969860676084480 | 0.7956524622981789 | 0.6971431881221406 |

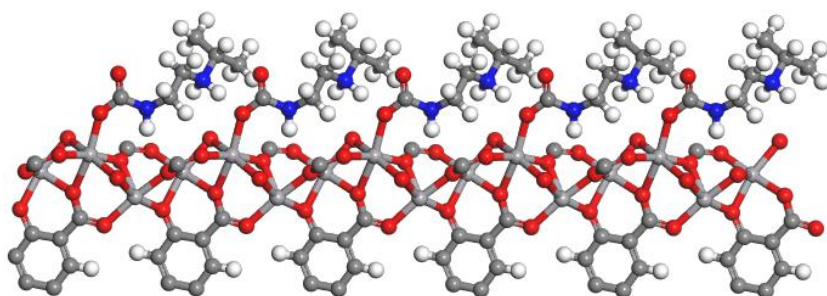

experimental-CO<sub>2</sub>-i-2-V<sub>2</sub>(dobpdc)

1.00000000000000

|                      |                     |                     |
|----------------------|---------------------|---------------------|
| 21.0366290371778639  | -0.3418382809233043 | 0.1052871616589888  |
| -11.6438257506666591 | 18.9383516884557501 | -0.0104081546216693 |
| -0.0471470333055754  | -0.0002447962396778 | 7.0206609404449853  |

| V | O  | C  | H  | N |
|---|----|----|----|---|
| 6 | 20 | 48 | 32 | 2 |

Direct

|                    |                    |                    |
|--------------------|--------------------|--------------------|
| 0.3435992435448896 | 0.7469986812595689 | 0.8225386749129626 |
| 0.2695208138927962 | 0.6474756632559746 | 0.1614084638006621 |
| 0.3851364157936396 | 0.6847045093072714 | 0.4830211717699391 |
| 0.6950231661805981 | 0.3664634797661192 | 0.2099254599973460 |
| 0.5872002427164726 | 0.2928761664444728 | 0.8758908948383741 |
| 0.6216274430692159 | 0.3939445138464955 | 0.5424196078355070 |
| 0.4356760506122633 | 0.7860033769141753 | 0.6278963309093823 |
| 0.3721781757939980 | 0.7400245733381844 | 0.2596778681342759 |
| 0.4052756206323431 | 0.8235506866207646 | 0.0380601257421277 |
| 0.2390245053789970 | 0.7005800530947276 | 0.9594246929354038 |
| 0.2829863347650203 | 0.6814381506813210 | 0.5932256498775841 |
| 0.1920942073167177 | 0.6298147443085764 | 0.3751073724270818 |
| 0.3161359269930024 | 0.5952263908039728 | 0.2920256675416569 |

|                    |                    |                    |
|--------------------|--------------------|--------------------|
| 0.3366896124134383 | 0.6542132705640303 | 0.9320655412660469 |
| 0.3783725942558574 | 0.6144828773429412 | 0.7032648499136543 |
| 0.4982249683597960 | 0.7152226289066892 | 0.4124736836340984 |
| 0.6049851989808539 | 0.7304839033876703 | 0.2879876659054125 |
| 0.7276833041816735 | 0.4516415863870319 | 0.4080240902029580 |
| 0.6825025527931939 | 0.3911683178105604 | 0.7739079138059237 |
| 0.7724191590154428 | 0.4259535707346306 | 0.9926475070850463 |
| 0.6464829956039257 | 0.2665791855587291 | 0.0758361534669975 |
| 0.6278428432032083 | 0.3063083048027114 | 0.4408889926556325 |
| 0.5721612702479448 | 0.2204620929411930 | 0.6599265464280026 |
| 0.5300229313169541 | 0.3350895773974017 | 0.7400940152807514 |
| 0.5930550235139813 | 0.3545282034582945 | 0.1068165995014369 |
| 0.5616539253906636 | 0.4070018047302865 | 0.3235345042662954 |
| 0.4639442245938623 | 0.8503446890667188 | 0.5472295176998152 |
| 0.4568247508751808 | 0.8625971238658546 | 0.3497541900362723 |
| 0.4914122213441361 | 0.9331062437246468 | 0.2835193323320681 |
| 0.5325192912042798 | 0.9927375093500328 | 0.3997800359839285 |
| 0.5382296717016631 | 0.9800379866253721 | 0.5941167926257508 |
| 0.5050513210031886 | 0.9112935071690536 | 0.6650239583945805 |
| 0.4098248195952665 | 0.8063278132267949 | 0.2082016670067026 |
| 0.1714692945403267 | 0.6712328749466541 | 0.8747380094971942 |
| 0.1569623032695818 | 0.6494249334616585 | 0.6793832127973101 |
| 0.0830030150238833 | 0.6178691686327443 | 0.6091511633384228 |
| 0.0229952466960173 | 0.6070611783389676 | 0.7205624490749627 |
| 0.0386155220117010 | 0.6301359081802779 | 0.9116137249656763 |
| 0.1105192336652137 | 0.6612895635304430 | 0.9860838205210347 |
| 0.2132636712865630 | 0.6536292055748700 | 0.5432909435062266 |
| 0.3356253402465427 | 0.5539401699637342 | 0.2056427973886865 |
| 0.3515611873553461 | 0.5567106700642852 | 0.0058546903755982 |
| 0.3759365379187262 | 0.5133643523547344 | 0.9337036413830263 |
| 0.3845951079269084 | 0.4669180561617245 | 0.0476274374860638 |
| 0.3657074609592464 | 0.4627246626265932 | 0.2424538633548730 |
| 0.3419532710844951 | 0.5046349847915670 | 0.3186842391914096 |
| 0.3544760865296895 | 0.6096202820199798 | 0.8713613289173694 |
| 0.5406818275455507 | 0.7196237971658038 | 0.2685213740222523 |
| 0.5412812683382952 | 0.6969634221921236 | 0.9248803542312563 |
| 0.6115104449123305 | 0.7595812418044053 | 0.8324134720826695 |
| 0.7958109878445482 | 0.4886203651731811 | 0.4915307221820413 |
| 0.8100678391391999 | 0.4815343482758429 | 0.6874962080973293 |
| 0.8845248994666239 | 0.5220276637278171 | 0.7563206395402825 |
| 0.9456216905756480 | 0.5693836284098756 | 0.6429955080352068 |
| 0.9304970052836169 | 0.5768109892229312 | 0.4513471585948304 |
| 0.8580459200773839 | 0.5378579244429974 | 0.3782935960637380 |
| 0.7528242959021400 | 0.4308114975101722 | 0.8247656344163691 |
| 0.6211955785864196 | 0.2038396521237986 | 0.1625395047124447 |
| 0.5986362311732083 | 0.1890079356362391 | 0.3585964526493830 |

|                    |                    |                    |
|--------------------|--------------------|--------------------|
| 0.5707738244501348 | 0.1200132300628080 | 0.4306084310008115 |
| 0.5653173116042418 | 0.0652569742487126 | 0.3211402853613729 |
| 0.5897289292444599 | 0.0813599415264712 | 0.1299887287614387 |
| 0.6164925295498983 | 0.1482145168820869 | 0.0532309334523678 |
| 0.5990563539649240 | 0.2404901080044402 | 0.4932002273725443 |
| 0.4945976520575670 | 0.3637255884114984 | 0.8228522341212058 |
| 0.5038781185759539 | 0.3859555259048668 | 0.0178077847735553 |
| 0.4657383535506546 | 0.4178063832354676 | 0.0846635459421166 |
| 0.4181471044490125 | 0.4282635084450452 | 0.9710868220694954 |
| 0.4078648950774629 | 0.4042673954213752 | 0.7809577150846878 |
| 0.4448121076364954 | 0.3730638526453738 | 0.7095110053205383 |
| 0.5549485167581123 | 0.3825673508936474 | 0.1562503334736696 |
| 0.6643035818273269 | 0.8595247818713329 | 0.5907819417258126 |
| 0.6425671769824560 | 0.8914166058176827 | 0.4301133618194928 |
| 0.7170766850687570 | 0.9166189964836319 | 0.7329340650819614 |
| 0.4823246558242474 | 0.9398397202323352 | 0.1341939933418658 |
| 0.5702896663196739 | 0.0251042751343866 | 0.6904635051343675 |
| 0.5096329979147792 | 0.9021655000334720 | 0.8160797904482604 |
| 0.0733567997007942 | 0.5993465150379803 | 0.4621426824780488 |
| 0.9932956563897690 | 0.6240229772679512 | 0.0020530504391955 |
| 0.1224134704281839 | 0.6791775564400913 | 0.1338526986652697 |
| 0.3918918539345196 | 0.5202284478851780 | 0.7837706091852834 |
| 0.3699856466491451 | 0.4254861026251279 | 0.3350234638368932 |
| 0.3283531855973025 | 0.5018744996951213 | 0.4697296673779698 |
| 0.5565917817237969 | 0.6590992577065553 | 0.9721884342557305 |
| 0.6414765339367379 | 0.7396988093502819 | 0.7530554292737111 |
| 0.8935103741266940 | 0.5129947777755567 | 0.9038536273523705 |
| 0.9767654224178761 | 0.6145791152768394 | 0.3590487439411842 |
| 0.8468265575785359 | 0.5439993197634511 | 0.2299705140336763 |
| 0.5510411218812744 | 0.1100324823619770 | 0.5776850428360979 |
| 0.5882455948689355 | 0.0404114980154414 | 0.0409713606985316 |
| 0.6352389247388677 | 0.1602824620247648 | 0.9053161613198596 |
| 0.4772530742206000 | 0.4371041879317573 | 0.2309261031056825 |
| 0.3696076790164717 | 0.4098859700064445 | 0.6882402481714122 |
| 0.4366553314145534 | 0.3548688029967128 | 0.5620936442694661 |
| 0.4966668658621092 | 0.6697531292547112 | 0.8172850007946285 |
| 0.5570191486194795 | 0.7624704273150327 | 0.5805276658857871 |
| 0.5644934104250908 | 0.8184590893823478 | 0.7515651856055893 |
| 0.6488595010761651 | 0.7966236765220956 | 0.9425448532747920 |
| 0.4569956284390903 | 0.7008209144316776 | 0.0815537686591698 |
| 0.6205502563516246 | 0.9228683073786066 | 0.4853788857215706 |
| 0.6005963379137328 | 0.8505097150444126 | 0.3341987369440182 |
| 0.6932558674278635 | 0.9272465279184834 | 0.3458912598797904 |
| 0.6904053865293981 | 0.8325493082425097 | 0.5282701418291699 |
| 0.7652095914234479 | 0.9602346571464175 | 0.6553586649510954 |
| 0.7395520620052914 | 0.8970039494461681 | 0.8404794413558688 |



0.6884422812044703 0.9394342635733809 0.8059525334071730  
 0.5117700463655723 0.7156424492680126 0.0867706670074792  
 0.5945721582328111 0.7994167476345739 0.6889795085185944

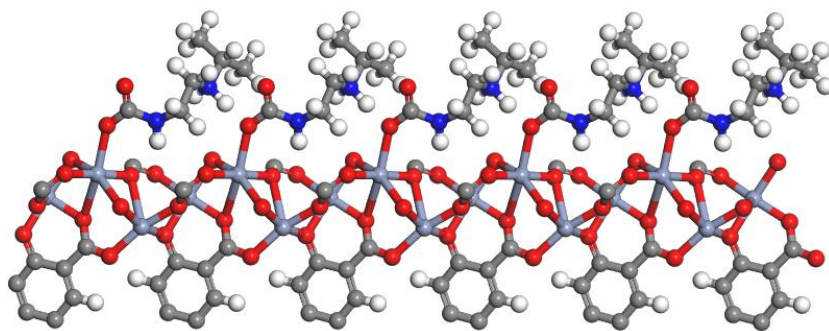

experimental-CO<sub>2</sub>-i-2-Cr<sub>2</sub>(dobpdc)

1.00000000000000

21.0895918014481722 0.0696488734609690 0.1210870809443572  
 -11.2893155094750988 18.9446565926070285 -0.0036802821861054  
 -0.0567221713168777 -0.0101138211545094 6.5143140713266066

| Cr | O  | C  | H  | N |
|----|----|----|----|---|
| 6  | 20 | 48 | 32 | 2 |

Direct

0.3275980293705345 0.7546232254576637 0.7945068911219693  
 0.2546314548939961 0.6384839339070680 0.1338135298091743  
 0.3889031241606631 0.6871653838087113 0.4531346437085659  
 0.7018340669862582 0.3577089808180460 0.2528885900878706  
 0.5776221334537865 0.2843457220341534 0.9189012081786672  
 0.6269140003734961 0.4025125817063469 0.5860961799029596  
 0.4217516482717727 0.7798051127468781 0.6286626372866237  
 0.3825248317527752 0.7409879534619535 0.2080221119387602  
 0.3838552087005596 0.8262605989019534 0.0235052346966498  
 0.2313168429696120 0.7041855842019018 0.9586366500884012  
 0.2703944500628168 0.7035386609508834 0.5410412208312394  
 0.1793200452696553 0.6195906849467647 0.3575465435073042  
 0.3075604860494394 0.5967947682416579 0.2910017315361131  
 0.3085991907056567 0.6364462501411552 0.8788695575129637  
 0.3909684357101355 0.6269985589102092 0.6904457379914746  
 0.5123428042479006 0.7307340485175189 0.3870910451722267  
 0.6136049599757456 0.7311795682667963 0.2698190926674897  
 0.7236378314826766 0.4455687930772783 0.4249976509528466  
 0.6844362357432203 0.4046216826358346 0.8378153043468330  
 0.7764262793540126 0.4134183901315396 0.0272366811683469  
 0.6489214651214681 0.2647933876334889 0.0917651559541284  
 0.6456988588263499 0.3019176550762168 0.5040995050806742  
 0.5615442760627474 0.2135245602523952 0.6925658268342687  
 0.5336160683908986 0.3342042944436230 0.7560300759418297  
 0.5761307567301088 0.3374540855694335 0.1696326972239532  
 0.5707889539270923 0.4185720081110560 0.3575424112156185  
 0.4572113102734079 0.8451415007875838 0.5479234978336578

|                    |                    |                    |
|--------------------|--------------------|--------------------|
| 0.4483062548127279 | 0.8604552362568256 | 0.3402248433183459 |
| 0.4833309549594986 | 0.9309186540466428 | 0.2746581247236932 |
| 0.5294214927756116 | 0.9870602280682306 | 0.4024535500534796 |
| 0.5399336543019402 | 0.9711658761707724 | 0.6044905945291248 |
| 0.5052093661975263 | 0.9022846497495323 | 0.6753633958799625 |
| 0.4022067624402155 | 0.8062106698848908 | 0.1855286254444479 |
| 0.1630095957982078 | 0.6756811262220523 | 0.8763558558222826 |
| 0.1458442613933428 | 0.6496654930679142 | 0.6716379412061002 |
| 0.0721227127680351 | 0.6148966251414336 | 0.6056603864680952 |
| 0.0152520141385111 | 0.6077447060072885 | 0.7311141404380948 |
| 0.0336760127623066 | 0.6372823697127288 | 0.9288916992353862 |
| 0.1056559115333329 | 0.6705605275049535 | 0.0002617214676164 |
| 0.2016319701614506 | 0.6576749167528106 | 0.5188840278106284 |
| 0.3284502577444997 | 0.5540083220806267 | 0.2058567509116145 |
| 0.3525862342196291 | 0.5606131537237857 | 0.9983261640108623 |
| 0.3815751105411209 | 0.5193863152530085 | 0.9287740057608005 |
| 0.3841110290254193 | 0.4692483056538350 | 0.0537199364537884 |
| 0.3556580247935344 | 0.4601413120108830 | 0.2540143791378355 |
| 0.3283166915897198 | 0.5011018208873423 | 0.3287171646483742 |
| 0.3505273710935839 | 0.6106141974384300 | 0.8500719676460591 |
| 0.5526602869060966 | 0.7264550868939210 | 0.2408943526515941 |
| 0.5539373251401116 | 0.6965597452071037 | 0.8765980805262501 |
| 0.6251257904050647 | 0.7557285502039264 | 0.7855053467273478 |
| 0.7913643228029770 | 0.4861887679792787 | 0.5088237334961576 |
| 0.8090095967667210 | 0.4778189235756187 | 0.7143746791052408 |
| 0.8823352569270710 | 0.5180374711812661 | 0.7825603152295315 |
| 0.9380898069440349 | 0.5683883099189160 | 0.6580793649337338 |
| 0.9188696726331358 | 0.5786867259991837 | 0.4593324560111967 |
| 0.8474111170172520 | 0.5388057180773274 | 0.3859116672485143 |
| 0.7539384928464443 | 0.4290655488523569 | 0.8646017519468785 |
| 0.6239643298401347 | 0.2004227585367531 | 0.1763429508183165 |
| 0.5970936033461101 | 0.1831198005649881 | 0.3813999184743793 |
| 0.5661300330548045 | 0.1132560138760539 | 0.4503497153396978 |
| 0.5641487486398589 | 0.0605315561397717 | 0.3278823183038782 |
| 0.5947895620965724 | 0.0794476126309362 | 0.1299200726698828 |
| 0.6238478882647414 | 0.1474304602754088 | 0.0551801524604443 |
| 0.6009994595210486 | 0.2354355464727362 | 0.5309486857078412 |
| 0.4949951787027231 | 0.3620791751131023 | 0.8378616779860835 |
| 0.5055277012459527 | 0.3883186061911346 | 0.0422663142552722 |
| 0.4685589684119691 | 0.4228425990275397 | 0.1072469869159249 |
| 0.4189629575052294 | 0.4295814503176416 | 0.9812115441648785 |
| 0.4057695665487273 | 0.3996213567016582 | 0.7839700600360615 |
| 0.4426131152260595 | 0.3665944822508180 | 0.7135302320827535 |
| 0.5536659242283335 | 0.3814963804625648 | 0.1947280255603161 |
| 0.6779189977931495 | 0.8656085223741812 | 0.5671626105540142 |
| 0.6549872405403079 | 0.9014644617451069 | 0.4068955374393468 |

|                    |                    |                    |
|--------------------|--------------------|--------------------|
| 0.7300137375289708 | 0.9176375273746444 | 0.7273902290465628 |
| 0.4717479762247052 | 0.9407661561368243 | 0.1189060149705341 |
| 0.5766755917419317 | 0.0140315308348704 | 0.7065947966634241 |
| 0.5130152305945757 | 0.8906668310308774 | 0.8332815996789691 |
| 0.0603793210163204 | 0.5921932930817349 | 0.4521075406278001 |
| 0.9903400283561723 | 0.6341582066056688 | 0.0274518320149966 |
| 0.1195395395353458 | 0.6931190642755496 | 0.1539352967137688 |
| 0.4038480573946899 | 0.5290059837790793 | 0.7735120509044080 |
| 0.3552390382629227 | 0.4197529553602948 | 0.3522498635525011 |
| 0.3067546198603068 | 0.4939648294054066 | 0.4843834269997416 |
| 0.5650969056499591 | 0.6556955047396897 | 0.9324549444305035 |
| 0.6472727195705872 | 0.7340865343699150 | 0.6740866137268497 |
| 0.8947745709460335 | 0.5076639352729586 | 0.9367526868770923 |
| 0.9612917991071797 | 0.6192170327168256 | 0.3615036275643675 |
| 0.8329867060977563 | 0.5469743016096018 | 0.2315695574399257 |
| 0.5422829810720629 | 0.1011104637709366 | 0.6038422807922785 |
| 0.5959384025079331 | 0.0395666589595933 | 0.0337369341018956 |
| 0.6472319980540107 | 0.1615559343664046 | 0.9013568483679109 |
| 0.4812075462436098 | 0.4459060607283050 | 0.2603323170739102 |
| 0.3654531916071093 | 0.4022959098297463 | 0.6847736698584228 |
| 0.4323790389019848 | 0.3439076010034015 | 0.5600391032648631 |
| 0.5115233916696411 | 0.6733750420957207 | 0.7561929865993875 |
| 0.5688816777465320 | 0.7742746640019362 | 0.5502332765843718 |
| 0.5867187229321971 | 0.8253954994355936 | 0.7643021884783892 |
| 0.6655284619409869 | 0.7840380478787381 | 0.9071219139690427 |
| 0.4733840718673719 | 0.7109767022691358 | 0.0290640335286128 |
| 0.6301436320343683 | 0.9294563544629426 | 0.4784785405214436 |
| 0.6153945897740201 | 0.8634589406314319 | 0.2967633964343790 |
| 0.7040271883268332 | 0.9402104424488797 | 0.3217230274723022 |
| 0.7033460167831223 | 0.8393023215557704 | 0.4881256842309369 |
| 0.7784879829367952 | 0.9604874182220513 | 0.6505590289406413 |
| 0.7495364185156888 | 0.8932833381393976 | 0.8385200006970805 |
| 0.7030179257189531 | 0.9415519535417829 | 0.8121245431990900 |
| 0.5253021309473596 | 0.7198023839127927 | 0.0423319070307286 |
| 0.6107545182603786 | 0.8059123282101197 | 0.6681329834401595 |

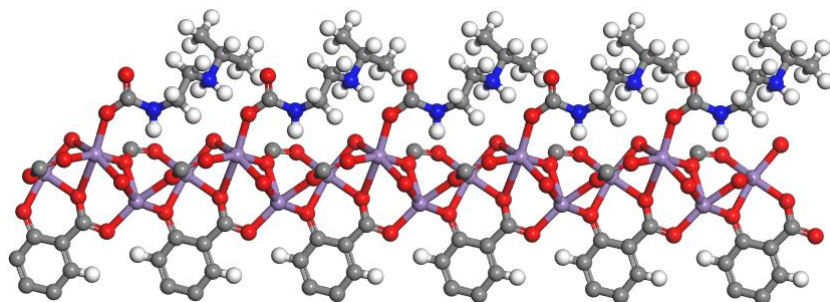

experimental-CO<sub>2</sub>-i-2-Mn<sub>2</sub>(dobpdc)

1.00000000000000

20.9245799419025396 -0.1053206318223693 -0.0181379244010517

-11.3619565890199148 19.1003687076959601 0.0736231950683150  
-0.0883374233546371 -0.0110323608951118 6.9261511732832588

Mn O C H N  
6 20 48 32 2

Direct

0.3419046512894326 0.7506651840588034 0.8146523989108161  
0.2657927297588927 0.6527897254108694 0.1667661787689667  
0.3939257914686820 0.6865344805065803 0.4688367253039587  
0.6975774732898969 0.3651656630154747 0.2228131961756290  
0.5877880632654566 0.2891571956432486 0.8870894800366855  
0.6188896130324153 0.3914420306283262 0.5541534945403228  
0.4327104946886422 0.7852289037078890 0.6217369880277062  
0.3728267289993639 0.7441982968935008 0.2491284848320916  
0.4044070398057755 0.8282829366883746 0.0286521227696142  
0.2376668151228145 0.7050085913285358 0.9528545752736335  
0.2784181990419441 0.6922174835705519 0.5732645958008575  
0.1841299907311438 0.6293209541145899 0.3695864019364734  
0.3174044316454143 0.6006209817282340 0.2844083871532135  
0.3326419685588604 0.6546382349850433 0.9227334191622347  
0.3776561148287669 0.616277727323032 0.6952398330701826  
0.5052780962914269 0.7204874681910809 0.3945483682412245  
0.6095870387958158 0.7308564550307182 0.2675890510849968  
0.7250057999326316 0.4453970979507815 0.4255886299356817  
0.6845488486193076 0.3906174716010256 0.7955666526046841  
0.7764820982981533 0.4220387284922111 0.0112635961611716  
0.6469018065800967 0.2647086673294439 0.0937300663153522  
0.6294172604796984 0.3019160581311411 0.4618389076405052  
0.5699970724774914 0.2152255145131861 0.6754400953278932  
0.5315453253845988 0.3353461683122063 0.7536059255290297  
0.5904205771245543 0.3520522666684016 0.1255784875161012  
0.5607620642679549 0.4088225402422978 0.3364846609560601  
0.4636906602753896 0.8496984889224919 0.5440297443946776  
0.4558496688468807 0.8639276524112063 0.3457908039087769  
0.4909508896080723 0.9338665491995073 0.2819124030759568  
0.5339159176297343 0.9912141839520388 0.4022364492389769  
0.5415684484202217 0.9767615790525710 0.5969412945292873  
0.5078280369293822 0.9083969175840352 0.6652917746414104  
0.4088814616127721 0.8095518983471237 0.2001960177146529  
0.1690120018676851 0.6749712577730378 0.8733694290183749  
0.1522018477490263 0.6508984571057823 0.6783189120216022  
0.0777249860297431 0.6169316465424828 0.6131971935072045  
0.0191922686518993 0.6066153280879192 0.7297753654015295  
0.0368656247837791 0.6326347308803832 0.9200556519853436  
0.1095459982613320 0.6659570681048663 0.9896778458023903  
0.2079603319456567 0.6577348037088413 0.5354239742478271  
0.3340917293088310 0.5564840602304315 0.2006836838028292

|                    |                    |                    |
|--------------------|--------------------|--------------------|
| 0.351188000483956  | 0.5592100860019045 | 0.0002982513687826 |
| 0.3751499636334330 | 0.5150980420136477 | 0.9290152219716035 |
| 0.3816356368218550 | 0.4672309763832061 | 0.0457238257128836 |
| 0.3604444754249769 | 0.4622426966022246 | 0.2408325434154435 |
| 0.3371080502603263 | 0.5051289835003132 | 0.3160364249285550 |
| 0.3530123825398306 | 0.6118449840004700 | 0.8646849372395948 |
| 0.5461691199405152 | 0.7222381938711706 | 0.2484416897922017 |
| 0.5437776233687686 | 0.6979875910469886 | 0.9011259066371338 |
| 0.6147670790982289 | 0.7582805404249271 | 0.8135874578906837 |
| 0.7930831571747490 | 0.4845098735302358 | 0.5069886335819689 |
| 0.8098739870926934 | 0.4775977278283960 | 0.7036631081695219 |
| 0.8837920775729202 | 0.5188584991373304 | 0.7718400253434439 |
| 0.9416310690035630 | 0.5673292787487512 | 0.6558429696649029 |
| 0.9236947981801578 | 0.5750630346250176 | 0.4636841420378914 |
| 0.8516802352932658 | 0.5350581758478441 | 0.3913845953573230 |
| 0.7546032929448785 | 0.4276253669919896 | 0.8429606002007333 |
| 0.6226391233920054 | 0.2017663870897266 | 0.1761759723910359 |
| 0.5982312225168727 | 0.1854180863948827 | 0.3716512736259503 |
| 0.5703264905715457 | 0.1167010215830757 | 0.4406796133989701 |
| 0.5669608261255092 | 0.0635903767554140 | 0.3275262565810237 |
| 0.5937075352439010 | 0.0811665910945081 | 0.1370652408419843 |
| 0.6206250052279927 | 0.1480182195961603 | 0.0634290763647343 |
| 0.5987579927116258 | 0.2364209285839323 | 0.5092316537058110 |
| 0.4939217865955285 | 0.3632821131219828 | 0.8313036581300821 |
| 0.5033068300026216 | 0.3869100683969791 | 0.0264408452835809 |
| 0.4645426862950117 | 0.4190152584235634 | 0.0903582622071468 |
| 0.4156659010559451 | 0.4279785655113031 | 0.9724376555835619 |
| 0.4047364238001663 | 0.4020984331317621 | 0.7820482689084400 |
| 0.4425235588583050 | 0.3706407083092387 | 0.7136238118147489 |
| 0.5539934095461518 | 0.3826364707105583 | 0.1691601916191985 |
| 0.6691101711507272 | 0.8602310242390487 | 0.5785484771484022 |
| 0.6474470839378057 | 0.8933871527312292 | 0.4163368026286847 |
| 0.7211637186743332 | 0.9147826472833245 | 0.7259031784499683 |
| 0.4811105257457768 | 0.9421642693427330 | 0.1317636292982911 |
| 0.5754309832803273 | 0.0202219870029268 | 0.6954981923712467 |
| 0.5132430962296866 | 0.8980433450650693 | 0.8173488854037032 |
| 0.0667050894944197 | 0.5967680755690381 | 0.4660399349365960 |
| 0.9925249477455367 | 0.6269936238480511 | 0.0138635912435063 |
| 0.1227485770748800 | 0.6856845196545649 | 0.1374085822875841 |
| 0.3920571107671975 | 0.5219573541750719 | 0.7783235869895933 |
| 0.3628669258102732 | 0.4236864885053393 | 0.3346022664814399 |
| 0.3218300420158045 | 0.5016739446974725 | 0.4675824955280703 |
| 0.5565513280274743 | 0.6576669297205413 | 0.9464190853551884 |
| 0.6426753758864336 | 0.7369890067306457 | 0.7292344985743853 |
| 0.8950842236980279 | 0.5100940812115908 | 0.9202783041402327 |
| 0.9675330868785750 | 0.6138129567317989 | 0.3703634993593354 |

|                    |                    |                    |
|--------------------|--------------------|--------------------|
| 0.8384093277753877 | 0.5413104977551342 | 0.2424007076069330 |
| 0.5491714472136664 | 0.1056409779949803 | 0.5876845743803685 |
| 0.5936759404499767 | 0.0412432689466158 | 0.0460022482957001 |
| 0.6409347631045250 | 0.1610675848604757 | 0.9156978196654890 |
| 0.4761313096145585 | 0.4393310933073238 | 0.2373539036579828 |
| 0.3653900120813560 | 0.4065884993103381 | 0.6866291664804578 |
| 0.4339053495896366 | 0.3511698096009965 | 0.5657154646856384 |
| 0.4995552533878964 | 0.6742740687160165 | 0.7901786990623378 |
| 0.5622810613146569 | 0.7674266955157591 | 0.5626164491147705 |
| 0.5713733041784224 | 0.8221623031254381 | 0.7420226645461483 |
| 0.6524509997751053 | 0.7918393093001939 | 0.9286537255281644 |
| 0.4614638045683392 | 0.7047705473431591 | 0.0609296682268194 |
| 0.6241725157706526 | 0.9239848590139061 | 0.4729555419023015 |
| 0.6067898869311747 | 0.8539831347232507 | 0.3159580729128564 |
| 0.6976962295044515 | 0.9291869327469442 | 0.3343415766966231 |
| 0.6948768162619317 | 0.8326749173928150 | 0.5150428368067637 |
| 0.7696835250801968 | 0.9569122370234524 | 0.6506513176046766 |
| 0.7420105411740749 | 0.8932519566522714 | 0.8361868540874369 |
| 0.6931897894112282 | 0.9388319202168915 | 0.7981987693852162 |
| 0.5156125179957556 | 0.7177507381973314 | 0.0654458842620755 |
| 0.5998377173583762 | 0.8019123321132327 | 0.6746356487601375 |

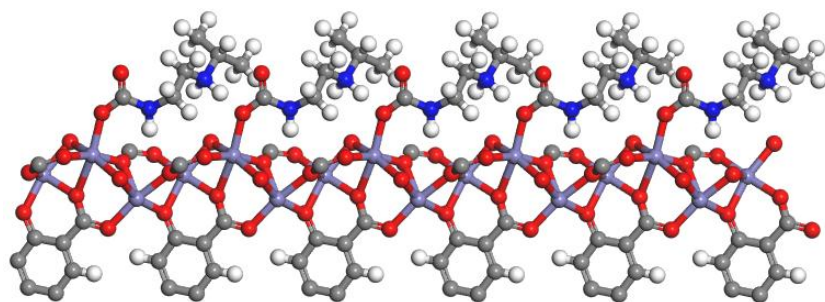

experimental-CO<sub>2</sub>-i-2-Fe<sub>2</sub>(dobpdc)

|                      |                     |                    |    |   |
|----------------------|---------------------|--------------------|----|---|
| 1.0000000000000000   |                     |                    |    |   |
| 20.6287573539005145  | -0.2489704919655566 | 0.1024997437218161 |    |   |
| -11.3315511499144836 | 19.1939625472962909 | 0.0193638588892802 |    |   |
| -0.0534633275135524  | -0.0048406011374229 | 6.8374553640468916 |    |   |
| Fe                   | O                   | C                  | H  | N |
| 6                    | 20                  | 48                 | 32 | 2 |

Direct

|                    |                    |                    |
|--------------------|--------------------|--------------------|
| 0.3442584725817331 | 0.7500348874059650 | 0.8197464921181159 |
| 0.2720268330199145 | 0.6545728859815673 | 0.1604313289097670 |
| 0.3892569482151479 | 0.6878698359485431 | 0.4789165062856773 |
| 0.6927503189000256 | 0.3618404439289345 | 0.2183495588955954 |
| 0.5871714126114176 | 0.2899453346166280 | 0.8839169293235486 |
| 0.6174811250494303 | 0.3867286058230868 | 0.5508603289897684 |
| 0.4343904949914384 | 0.7872586799193382 | 0.6271499000186104 |
| 0.3760504284464133 | 0.7445361648128992 | 0.2558187114017067 |
| 0.4057565101405803 | 0.8262405972732014 | 0.0269255192756432 |

|                    |                    |                    |
|--------------------|--------------------|--------------------|
| 0.2403710742137231 | 0.7044332004010250 | 0.9559137210927721 |
| 0.2833392890669633 | 0.6902967586593779 | 0.5854763695390496 |
| 0.1923175208029882 | 0.6378621794227730 | 0.3608295717324810 |
| 0.3177504339920100 | 0.6020607632389438 | 0.2859220373100697 |
| 0.3394551128028031 | 0.6580967241202791 | 0.9274157168033009 |
| 0.3764118185237849 | 0.6149606088451062 | 0.6868596790449200 |
| 0.5025429383078335 | 0.7195632481048461 | 0.4113056072529151 |
| 0.6078818974294299 | 0.7283287080119361 | 0.2817245556396252 |
| 0.7224724670163707 | 0.4425840717626516 | 0.4186423355620950 |
| 0.6809634719443080 | 0.3891876959390532 | 0.7873953678538667 |
| 0.7711616969549639 | 0.4227260413179867 | 0.0140502287097464 |
| 0.6466970113605951 | 0.2648505896634627 | 0.0864739940982741 |
| 0.6300533316152143 | 0.3015494173951035 | 0.4545270025083928 |
| 0.5740977793064688 | 0.2176193765925137 | 0.6809509190739690 |
| 0.5285160768398904 | 0.3312771148247412 | 0.7502402235915763 |
| 0.5858189771101903 | 0.3461177116128481 | 0.1204993855315014 |
| 0.5549533189426973 | 0.3996373793735790 | 0.3438624943830575 |
| 0.4656082378235333 | 0.8514375364923671 | 0.5472713929940410 |
| 0.4578934872196873 | 0.8648201939163368 | 0.3461432150681591 |
| 0.4923007883258982 | 0.9344190469826640 | 0.2793790131505365 |
| 0.5352090487164611 | 0.9922187453001865 | 0.3997227900044129 |
| 0.5435781096669278 | 0.9785117558659630 | 0.5968377025684832 |
| 0.5100387327473455 | 0.9105699155747283 | 0.6682445300136731 |
| 0.4112884937209868 | 0.8093191848803888 | 0.2019258408786636 |
| 0.1710658223346302 | 0.6756012451782283 | 0.8749855394790401 |
| 0.1551436278907559 | 0.6531634186679083 | 0.6762841979244162 |
| 0.0799550674002457 | 0.6198218280863870 | 0.6084294994066519 |
| 0.0198872629029639 | 0.6088049728723210 | 0.7266575062383783 |
| 0.0369815636037342 | 0.6340642055512569 | 0.9202733632656971 |
| 0.1102928432513766 | 0.6666497453192355 | 0.9925085101428039 |
| 0.2131427057030007 | 0.6607032477309269 | 0.5347950115910917 |
| 0.3339831716404073 | 0.5573110155005465 | 0.2019019528822836 |
| 0.3516864346006124 | 0.5593886240979694 | 0.9988668348313957 |
| 0.3747667753050566 | 0.5143036321254073 | 0.9271003989833183 |
| 0.3793008492920386 | 0.4658604015830374 | 0.0462934709225829 |
| 0.3569690392369390 | 0.4613538064235427 | 0.2437189586864356 |
| 0.3348333936477828 | 0.5053879186305218 | 0.3195236301257816 |
| 0.3549562156859299 | 0.6123225174739259 | 0.8621812517389561 |
| 0.5439999227115828 | 0.7208200788883732 | 0.2624969959293817 |
| 0.5442104584348102 | 0.6993728816846165 | 0.9095074403386896 |
| 0.6164667675496225 | 0.7605311274295222 | 0.8217814059981557 |
| 0.7910598281469206 | 0.4833521244064713 | 0.5008568133879407 |
| 0.8077487850065128 | 0.4777974033791740 | 0.7009477634466836 |
| 0.8824367610334851 | 0.5201296563562599 | 0.7702679504356980 |
| 0.9412574709595279 | 0.5689303831233226 | 0.6521947371002915 |
| 0.9232483393456062 | 0.5759567495139264 | 0.4572889843327335 |

|                    |                    |                    |
|--------------------|--------------------|--------------------|
| 0.8505659672524674 | 0.5346501388701469 | 0.3836010437049883 |
| 0.7511249022442230 | 0.4276786791317405 | 0.8408954373267015 |
| 0.6228324763263696 | 0.2021518287903050 | 0.1698324426892336 |
| 0.5991957803737264 | 0.1857350555017263 | 0.3694817740796184 |
| 0.5713015523989038 | 0.1172033976566330 | 0.4395899867959488 |
| 0.5677359671226836 | 0.0643542693720969 | 0.3236411072816929 |
| 0.5941966156614389 | 0.0820998632338181 | 0.1293726752361329 |
| 0.6207089151369397 | 0.1486329619998628 | 0.0543499497284323 |
| 0.6006819765492302 | 0.2369335645363747 | 0.5085689713872806 |
| 0.4901812027532810 | 0.3589526863874481 | 0.8299132743096901 |
| 0.4985466944299441 | 0.3816423633629430 | 0.0284890429093672 |
| 0.4602555522088876 | 0.4147475903788237 | 0.0936465880732853 |
| 0.4124120318640052 | 0.4252149562003341 | 0.9734884448112675 |
| 0.4014940010044507 | 0.3992811270267489 | 0.7806512736137036 |
| 0.4389588886263365 | 0.3670629216759193 | 0.7109054486380512 |
| 0.5485880076662237 | 0.3757300182194927 | 0.1711393984871129 |
| 0.6707033990385626 | 0.8608380731680496 | 0.5787549283365462 |
| 0.6485741755885993 | 0.8922298491883112 | 0.4114290837940711 |
| 0.7238525461038635 | 0.9170326260072673 | 0.7233906782826752 |
| 0.4819499832916666 | 0.9419588232423651 | 0.1274018918946450 |
| 0.5779562185175663 | 0.0223999111821302 | 0.6948720582551490 |
| 0.5160433193859629 | 0.9008786056857140 | 0.8220864758041705 |
| 0.0696720083802750 | 0.6004810811410688 | 0.4585944214554062 |
| 0.9914502807697588 | 0.6282233716835707 | 0.0148145532839120 |
| 0.1229586381412654 | 0.6856454290531164 | 0.1427369713558017 |
| 0.3926814628937704 | 0.5209387571173738 | 0.7746247424735790 |
| 0.3574890462019338 | 0.4221213729273218 | 0.3388370666716509 |
| 0.3187283350510866 | 0.5022923325433106 | 0.4727627355671585 |
| 0.5574720154320200 | 0.6593413597473874 | 0.9536146578646850 |
| 0.6456573654027616 | 0.7400355473951284 | 0.7359866469820545 |
| 0.8934836646986418 | 0.5118507157213484 | 0.9209913438322920 |
| 0.9677375039733961 | 0.6152776927313627 | 0.3627286023560951 |
| 0.8374146701631039 | 0.5403668665577938 | 0.2325027125298433 |
| 0.5504408387120158 | 0.1061880703910480 | 0.5896691900647453 |
| 0.5943587077127985 | 0.0424455469087473 | 0.0364064994290743 |
| 0.6407614688008574 | 0.1616817883435314 | 0.9037899298059453 |
| 0.4716997715650144 | 0.4347103024960343 | 0.2428307691346093 |
| 0.3623898469244951 | 0.4045192510883792 | 0.6842427891214194 |
| 0.4305164398474732 | 0.3478379395727835 | 0.5609906054503416 |
| 0.5002342845477640 | 0.6760752752072886 | 0.7956837853021074 |
| 0.5610392872812582 | 0.7675175939871897 | 0.5708408906961708 |
| 0.5725061813891701 | 0.8240128536753969 | 0.7505185769319218 |
| 0.6541438586975620 | 0.7942914865653070 | 0.9383377844860407 |
| 0.4596150768552528 | 0.7054038053339436 | 0.0721817361789715 |
| 0.6252132874252413 | 0.9234196948629491 | 0.4657237666685569 |
| 0.6070872865167692 | 0.8518487395877953 | 0.3128355881557575 |



|                    |                    |                    |
|--------------------|--------------------|--------------------|
| 0.6995953373653471 | 0.9271747100415464 | 0.3255676244456239 |
| 0.6969691881269138 | 0.8330322388465010 | 0.5165878119186764 |
| 0.7730934563283086 | 0.9584932440864653 | 0.6440164010250201 |
| 0.7451411392230299 | 0.8967891874840587 | 0.8372246142410955 |
| 0.6954519576869903 | 0.9416189903981893 | 0.7941193846221984 |
| 0.5143285921240974 | 0.7176191908607209 | 0.0772266723390423 |
| 0.6007621691256244 | 0.8033137277932503 | 0.6810279473580230 |

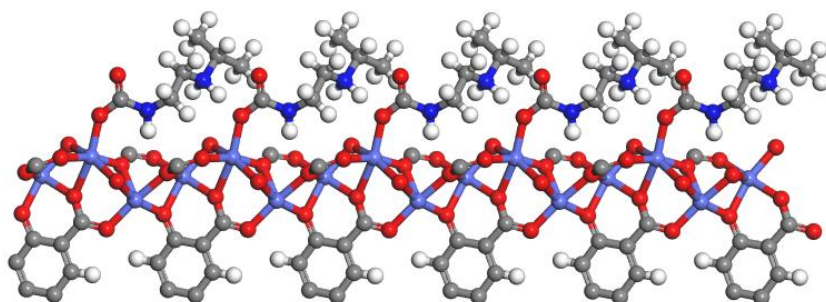

experimental-CO<sub>2</sub>-i-2-Co<sub>2</sub>(dobpdc)

|                      |                     |                    |    |   |
|----------------------|---------------------|--------------------|----|---|
| 1.0000000000000000   |                     |                    |    |   |
| 20.4153876434187005  | -0.1248403559461782 | 0.0956485489989049 |    |   |
| -11.1066950857792737 | 19.0573501749672687 | 0.0332754310560381 |    |   |
| -0.0548991221568655  | -0.0024883582378659 | 6.7953264322829954 |    |   |
| Co                   | O                   | C                  | H  | N |
| 6                    | 20                  | 48                 | 32 | 2 |

Direct

|                    |                    |                    |
|--------------------|--------------------|--------------------|
| 0.3448903838471864 | 0.7519571173260999 | 0.8205784147424495 |
| 0.2719972199196974 | 0.6581155589653847 | 0.1586581893326766 |
| 0.3875276132220975 | 0.6881885814157584 | 0.4730521944253212 |
| 0.6948554023858264 | 0.3639365438476858 | 0.2192040245908728 |
| 0.5914963771066866 | 0.2914065965127790 | 0.8852848188499394 |
| 0.6173166780777350 | 0.3862029333735251 | 0.5515071085584040 |
| 0.4301888828902705 | 0.7865263738375674 | 0.6294859845569576 |
| 0.3725506748989744 | 0.7448666539761106 | 0.2567773637980224 |
| 0.4007541418550034 | 0.8269704806182503 | 0.0273282683937524 |
| 0.2413905922159714 | 0.7062307426306518 | 0.9565724921622376 |
| 0.2844699752674842 | 0.6882219163312797 | 0.5901881571036753 |
| 0.1942572948172767 | 0.6395752747012367 | 0.3597490249278934 |
| 0.3136797364680888 | 0.6029049483913340 | 0.2871782794798321 |
| 0.3432353455615100 | 0.6641302444811572 | 0.9333100835269761 |
| 0.3755140208713996 | 0.6180412525718353 | 0.6863705173500136 |
| 0.4983201513958946 | 0.7187663359249115 | 0.4121634783136798 |
| 0.6037062663589765 | 0.7247635862404778 | 0.2867893922427598 |
| 0.7224367993396683 | 0.4406606893915566 | 0.4165839794652939 |
| 0.6820738857432289 | 0.3852082004187380 | 0.7816120509842932 |
| 0.7715853493095750 | 0.4188246522432451 | 0.0131391130825449 |
| 0.6479883966029050 | 0.2666040598575350 | 0.0847739876365239 |
| 0.6279471058856956 | 0.3031118649153939 | 0.4487805085595014 |
| 0.5738076645126640 | 0.2200935933286416 | 0.6806253892106966 |

|                    |                    |                    |
|--------------------|--------------------|--------------------|
| 0.5331132544447073 | 0.3340356917215743 | 0.7480847459123865 |
| 0.5933550926777258 | 0.3519163722380725 | 0.1146998532970116 |
| 0.5609222890336554 | 0.4041644527937649 | 0.3428291182630403 |
| 0.4632103123909417 | 0.8511256554042390 | 0.5489321692888964 |
| 0.4560159987499404 | 0.8650681933652393 | 0.3463647793607834 |
| 0.4919125301451288 | 0.9349836684976864 | 0.2789721100460767 |
| 0.5358777920029212 | 0.9925701037415422 | 0.4002954501367952 |
| 0.5438844619864653 | 0.9782638111067286 | 0.5985409680781970 |
| 0.5089125667638115 | 0.9099237916155261 | 0.6704554945612671 |
| 0.4077634298905508 | 0.8097219439623444 | 0.2023741578265188 |
| 0.1715706227795835 | 0.6768382875816030 | 0.8758458180854305 |
| 0.1558890229740797 | 0.6540276010700410 | 0.6765615308302984 |
| 0.0805045272384888 | 0.6205473381825115 | 0.6079070290274444 |
| 0.0199475094925035 | 0.6094820378709969 | 0.7269636133031128 |
| 0.0368064302031854 | 0.6351192986225840 | 0.9213114388263151 |
| 0.1104642727845331 | 0.6681614736967560 | 0.9939251067232959 |
| 0.2147023832330675 | 0.6610361743895794 | 0.5359698924751015 |
| 0.3306067462739506 | 0.5580395601533183 | 0.2024609790483609 |
| 0.3497781287668218 | 0.5609839664825458 | 0.9989480693212442 |
| 0.3732729070877667 | 0.5154895536492319 | 0.9266054227722336 |
| 0.3775715946311351 | 0.4661999623984201 | 0.0463019339063209 |
| 0.3540072321355439 | 0.4609270351143735 | 0.2440139025058414 |
| 0.3307085330020243 | 0.5049547983663771 | 0.3199300453846803 |
| 0.3549935374721471 | 0.6158840118800555 | 0.8632275278846109 |
| 0.5402119626433759 | 0.7190192464465923 | 0.2636140549764008 |
| 0.5415849693516037 | 0.6966302892202094 | 0.9100584971257177 |
| 0.6148558217608198 | 0.7564053909384114 | 0.8221855300459637 |
| 0.7911485589112814 | 0.4819504608553231 | 0.4992970817055777 |
| 0.8081576783735187 | 0.4760759673178754 | 0.7002184858992280 |
| 0.8826775772750679 | 0.5192063703700214 | 0.7708038990051165 |
| 0.9410690306539777 | 0.5689669749074255 | 0.6523149909181782 |
| 0.9226480261082628 | 0.5761974967227133 | 0.4565651080195323 |
| 0.8499595186181850 | 0.5341991749432538 | 0.3819430208299011 |
| 0.7515723005915760 | 0.4243404498674153 | 0.8387060681626082 |
| 0.6241781576944518 | 0.2034788596291293 | 0.1687350799938088 |
| 0.5999818423355450 | 0.1871657234667410 | 0.3690728624745176 |
| 0.5723803875441362 | 0.1184678980063438 | 0.4403919610630638 |
| 0.5693441575033091 | 0.0652195006684337 | 0.3241324216183941 |
| 0.5965673783368146 | 0.0829266321372586 | 0.1293733906402608 |
| 0.6231456283314358 | 0.1498341789871347 | 0.0534827160003601 |
| 0.6002658716581095 | 0.2390037149642055 | 0.5066545183952869 |
| 0.4935401859529023 | 0.3614697337681250 | 0.8283835758670861 |
| 0.5019796252803843 | 0.3845509414775066 | 0.0276620449194169 |
| 0.4618074100679337 | 0.4166267555104568 | 0.0940905027658587 |
| 0.4122912531155905 | 0.4259582659170817 | 0.9734881775465567 |
| 0.4015986327640277 | 0.3997920618807953 | 0.7798429172105728 |

|                    |                    |                    |
|--------------------|--------------------|--------------------|
| 0.4407325348958508 | 0.3682864701321478 | 0.7092415948645439 |
| 0.5543914136213957 | 0.3800875535128299 | 0.1687876181834440 |
| 0.6709761042185391 | 0.8571868344917490 | 0.5779175341081384 |
| 0.6495729481414756 | 0.8910978744390263 | 0.4129825961142686 |
| 0.7265851808518917 | 0.9118953859305705 | 0.7229914324242586 |
| 0.4817381395680016 | 0.9431285376856025 | 0.1261581392044775 |
| 0.5789372864152398 | 0.0219730897433905 | 0.6971457404014316 |
| 0.5144258190357149 | 0.8997423834081530 | 0.8253518403113560 |
| 0.0703235213858733 | 0.6008490860308484 | 0.4574868148172513 |
| 0.9908135071531419 | 0.6291793598965114 | 0.0162119625893808 |
| 0.1230445614339573 | 0.6875384129678039 | 0.1446914716061585 |
| 0.3921667529572730 | 0.5226502530712835 | 0.7738710832609854 |
| 0.3544884630373346 | 0.4211131865305546 | 0.3392517134846074 |
| 0.3133718763244175 | 0.5011732263338686 | 0.4733251361724200 |
| 0.5535608029001011 | 0.6553719497758337 | 0.9569979559685819 |
| 0.6426524800204660 | 0.7342945988053842 | 0.7340984188337885 |
| 0.8941729842328101 | 0.5107244521278176 | 0.9221588869746924 |
| 0.9668059704758889 | 0.6161802644265819 | 0.3620218529688373 |
| 0.8363848359593149 | 0.5400966675987959 | 0.2302178292834753 |
| 0.5509134198252781 | 0.1074571853929882 | 0.5909137804101903 |
| 0.5971895230646709 | 0.0429420222438139 | 0.0365768042055095 |
| 0.6438575235181716 | 0.1629358624018238 | 0.9025243415492810 |
| 0.4731587323833182 | 0.4369769270088142 | 0.2438476294297942 |
| 0.3613889200038116 | 0.4043282714540553 | 0.6833986203570959 |
| 0.4323944286900527 | 0.3487247502032318 | 0.5587623062784388 |
| 0.4978297959823905 | 0.6741235881216170 | 0.7945914333258983 |
| 0.5592860597472580 | 0.7664859042062488 | 0.5737892421998083 |
| 0.5740354662982341 | 0.8239831880291106 | 0.7551092100637646 |
| 0.6534429594421454 | 0.7892794263570906 | 0.9392586505228309 |
| 0.4574567771878932 | 0.7066182255682563 | 0.0679560730703912 |
| 0.6278825094980718 | 0.9238924297713567 | 0.4709534273619056 |
| 0.6067500459982043 | 0.8518007122557876 | 0.3138663318627195 |
| 0.7007515523639327 | 0.9251296386672152 | 0.3257189795583599 |
| 0.6949206062936994 | 0.8272052811653268 | 0.5120812074618755 |
| 0.7762774212841848 | 0.9523518177061163 | 0.6420984634198277 |
| 0.7472337794881199 | 0.8894905705272294 | 0.8345835176825602 |
| 0.7003765285490360 | 0.9384955480970518 | 0.7979586677255099 |
| 0.5118094457240119 | 0.7167624976850107 | 0.0763007153393218 |
| 0.6003623174420767 | 0.8012673560203893 | 0.6826600772597970 |

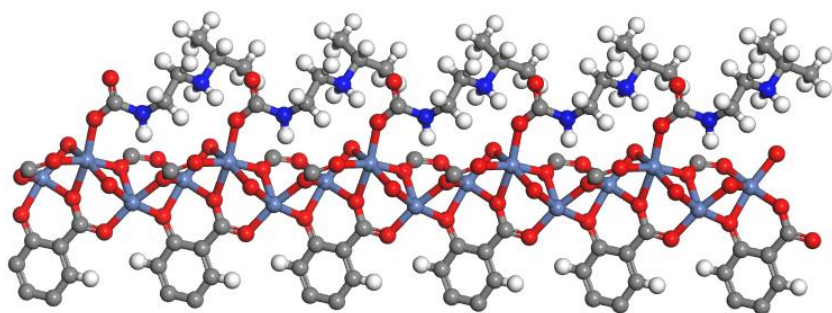

experimental-CO<sub>2</sub>-i-2-Ni<sub>2</sub>(dobpdc)

1.00000000000000

20.3698556776778190 -0.2293983379148000 0.1086215780151701

-11.1739947141693641 18.9500684391228198 0.0107995150608311

-0.0501608128425239 -0.0062925418651384 6.7293351036835194

Ni O C H N

6 20 48 32 2

Direct

0.3421241992554508 0.7476958113864827 0.8174510091263003

0.2748955695942371 0.6559443810619138 0.1552432417843807

0.3871139477268317 0.6898120488862490 0.4761735555234982

0.6903108529911306 0.3605393575234976 0.2217795291329347

0.5889450947576744 0.2931457034992327 0.8880599163900449

0.6194027985198752 0.3860822876257776 0.5545515152510657

0.4322934744286507 0.7844543573453683 0.6329101183187551

0.3717908190800682 0.7417627962390846 0.2555715313878958

0.4007538993829232 0.8236718724702606 0.0222774605560321

0.2435567795428484 0.7073361652377820 0.9607971519356140

0.2870757578253506 0.6887864365647071 0.5863531784920117

0.1962940729781555 0.6374671187205548 0.3549357508847409

0.3158258405834289 0.6034522780214922 0.2930560335045094

0.3396511628606370 0.6615817163604485 0.9286811056815031

0.3782806304850604 0.6191229680776410 0.6843605644294474

0.4971693125855468 0.7175166006603034 0.4156079341545373

0.6040132822504907 0.7248609957835551 0.2926571913222754

0.7186890116363979 0.4423819359089238 0.4119000285594321

0.6772723383547257 0.3870574622201898 0.7896947919332069

0.7682532973517218 0.4193181536593618 0.0184811956165448

0.6505668686716951 0.2687328690662178 0.0798764882758683

0.6319080888415298 0.3057271969884459 0.4566990136062669

0.5738770893076599 0.2211532230048815 0.6856624133240409

0.5296372785266217 0.3287540945643165 0.7441094534775844

0.5889703144581248 0.3454872648744296 0.1234798068112315

0.5587855498706878 0.4004587057474565 0.3493982899146539

0.4630996299262754 0.8492842464850104 0.5505849476912141

0.4547952194677378 0.8630985319305446 0.3464754972093910

0.4895572319398147 0.9335091622295618 0.2786201849943179

0.5334912893825366 0.9920296657830827 0.4005636382460918

|                    |                    |                    |
|--------------------|--------------------|--------------------|
| 0.5424274837156571 | 0.9780671820745187 | 0.6001705923193142 |
| 0.5086895741214569 | 0.9092611523593453 | 0.6725052911063554 |
| 0.4071043389181673 | 0.8071696490021525 | 0.1995557908498136 |
| 0.1735103877996849 | 0.6764238556698218 | 0.8765585084862401 |
| 0.1575103172297022 | 0.6525275212393015 | 0.6753730681929546 |
| 0.0814743596830893 | 0.6182129220498904 | 0.6058516178567360 |
| 0.0204622549065837 | 0.6073377321624576 | 0.7249894658630782 |
| 0.0375365178330405 | 0.6338635947517711 | 0.9206086211337098 |
| 0.1117085728519710 | 0.6676199754510809 | 0.9942272810757866 |
| 0.2163437638221267 | 0.6596733716205564 | 0.5320643013177258 |
| 0.3329375927578659 | 0.5587850078559214 | 0.2059117985118463 |
| 0.3514343099621408 | 0.5612405875303684 | 0.9997195093056003 |
| 0.3753039960802154 | 0.5159667479935424 | 0.9263776790392720 |
| 0.3798347101628006 | 0.4667470753365502 | 0.0469660991271569 |
| 0.3565480071244055 | 0.4616317190805608 | 0.2469714645911122 |
| 0.3334867388345484 | 0.5057943038384195 | 0.3241446327828323 |
| 0.3555612307410027 | 0.6152953758853656 | 0.8608831648055620 |
| 0.5400197890551268 | 0.7184200362661348 | 0.2676106637743407 |
| 0.5439859590106427 | 0.6978386576847317 | 0.9099109827662336 |
| 0.6172929881516936 | 0.7596982151006606 | 0.8226261002583070 |
| 0.7882866364403859 | 0.4819080246316081 | 0.4969199959880443 |
| 0.8055688972027903 | 0.4753653081259646 | 0.6995142114096794 |
| 0.8813289544853885 | 0.5174435661086161 | 0.7692035533559677 |
| 0.9408772989271381 | 0.5669985454571416 | 0.6494973476083483 |
| 0.9224693899046964 | 0.5749804646677112 | 0.4527098274079463 |
| 0.8486750519244106 | 0.5340043976042507 | 0.3786910025975422 |
| 0.7485048575065709 | 0.4249992467281928 | 0.8432966457755492 |
| 0.6246011972686053 | 0.2050993068663851 | 0.1665448547547030 |
| 0.5994371779639819 | 0.1883226158151534 | 0.3688512563124541 |
| 0.5703398336400562 | 0.1188268026412284 | 0.4401616410985076 |
| 0.5668959803550999 | 0.0651178909457354 | 0.3232546295246793 |
| 0.5948052753385917 | 0.0830794981466362 | 0.1270045352808881 |
| 0.6225956330619318 | 0.1506074624344733 | 0.0507541260985256 |
| 0.6009616247931935 | 0.2400922179584602 | 0.5112580549637916 |
| 0.4920912229372580 | 0.3579918533798117 | 0.8270779972690622 |
| 0.5013585382481579 | 0.3820418618284249 | 0.0282665019600703 |
| 0.4628193583694302 | 0.4158647039277785 | 0.0943437954508385 |
| 0.4136959084353977 | 0.4257981535549722 | 0.9729948282027853 |
| 0.4018422244527172 | 0.3985690977382122 | 0.7782400777413840 |
| 0.4395469932306713 | 0.3656145968623569 | 0.7075585170573138 |
| 0.5519131472743162 | 0.3762993005107290 | 0.1744595379518413 |
| 0.6717799446688251 | 0.8614299090631317 | 0.5774838148675250 |
| 0.6495030733046443 | 0.8930825182630772 | 0.4069994977492378 |
| 0.7258210064176801 | 0.9183761259374892 | 0.7239812409400007 |
| 0.4787119255507905 | 0.9411750271504684 | 0.1245757551271676 |
| 0.5776126545936519 | 0.0224878083367222 | 0.6994057136112023 |

|                    |                    |                    |
|--------------------|--------------------|--------------------|
| 0.5153894746702338 | 0.8994750938473726 | 0.8283107644583944 |
| 0.0712428540315196 | 0.5980632948490245 | 0.4541610097224557 |
| 0.9912755645557079 | 0.6283006439536407 | 0.0154199134369796 |
| 0.1244402669090138 | 0.6879610595449998 | 0.1457516028605892 |
| 0.3940024376264820 | 0.5231542509592962 | 0.7718700848677371 |
| 0.3569852685536454 | 0.4217315128801161 | 0.3430075510036444 |
| 0.3164004552052290 | 0.5020547005420539 | 0.4792991063821119 |
| 0.5573383640862070 | 0.6575242012596964 | 0.9578338009713933 |
| 0.6463935469362994 | 0.7390166105125212 | 0.7329795917055408 |
| 0.8926149415806900 | 0.5085110990135802 | 0.9216964471214519 |
| 0.9674724786418853 | 0.6149924503055803 | 0.3571005621415843 |
| 0.8351435785358802 | 0.5407173839874230 | 0.2263085827719089 |
| 0.5485294164579614 | 0.1077570196824744 | 0.5920408205005578 |
| 0.5953142912116748 | 0.0428218683934355 | 0.0335889056133798 |
| 0.6440655985459171 | 0.1638452608310814 | 0.8988017609929583 |
| 0.4749254975714275 | 0.4367037954377035 | 0.2452920402021163 |
| 0.3616239127517699 | 0.4031998263298964 | 0.6810946680756076 |
| 0.4301445639873215 | 0.3452056412837659 | 0.5562138616278858 |
| 0.5003655096443596 | 0.6741966977804376 | 0.7922164722392185 |
| 0.5596169786268826 | 0.7676779426650764 | 0.5740599632123204 |
| 0.5736601759218598 | 0.8251505220182072 | 0.7566919560821413 |
| 0.6556041206708243 | 0.7933907498644664 | 0.9414316511503575 |
| 0.4582158039371826 | 0.7064718770166575 | 0.0670106766338821 |
| 0.6257937644223781 | 0.9247570321237444 | 0.4614117949809603 |
| 0.6076562886901568 | 0.8520529878562481 | 0.3069464046714175 |
| 0.7012416231421912 | 0.9283398603326171 | 0.3199521224161017 |
| 0.6980664122712403 | 0.8328949663159534 | 0.5147591708537799 |
| 0.7757181890591895 | 0.9601364075112305 | 0.6431563549622750 |
| 0.7471903798785479 | 0.8977286392190033 | 0.8396844856469526 |
| 0.6973070622107671 | 0.9435575536171521 | 0.7959201144820203 |
| 0.5126771454377766 | 0.7166201749523617 | 0.0771708207604685 |
| 0.6011767375856537 | 0.8036923425485619 | 0.6828387906474410 |

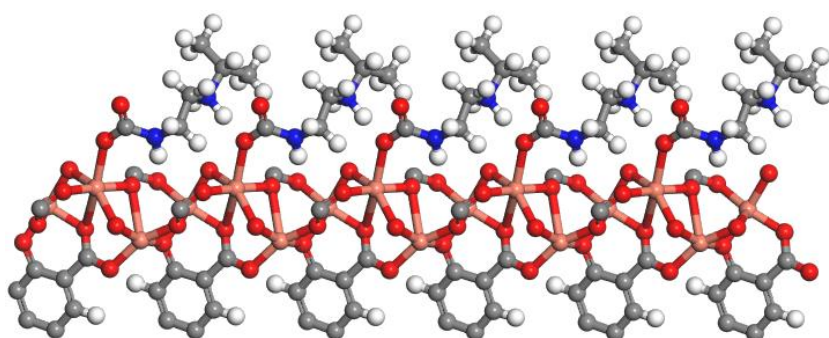

experimental-CO<sub>2</sub>-i-2-Cu<sub>2</sub>(dobpdc)

1.00000000000000

|                      |                     |                    |
|----------------------|---------------------|--------------------|
| 20.9456781943469466  | 0.1064508597184458  | 0.0944247286118163 |
| -11.1720600706986382 | 18.6538081929009572 | 0.0223327153084166 |
| -0.0552169460898520  | -0.0035080098020596 | 6.1953951107104102 |

Cu O C H N  
6 20 48 32 2

Direct

|                    |                    |                    |
|--------------------|--------------------|--------------------|
| 0.3238481165807343 | 0.7507424119491901 | 0.7896662699038259 |
| 0.2562987874986220 | 0.6372304521815479 | 0.1263833134979748 |
| 0.3894642328239257 | 0.6885842914360012 | 0.4450427274899695 |
| 0.6994123264496892 | 0.3564878339872735 | 0.2735420470912189 |
| 0.5791853652079766 | 0.2874389808637332 | 0.9396059360691069 |
| 0.6295778046744047 | 0.4026191681198625 | 0.6059612220104995 |
| 0.4183925708511467 | 0.7746038696261266 | 0.6391083528854722 |
| 0.3841340276837073 | 0.7382288016259650 | 0.1931575185874550 |
| 0.3778372473257789 | 0.8230924420542607 | 0.0117794343522775 |
| 0.2337080790071155 | 0.7053825224185601 | 0.9670577831047851 |
| 0.2710614858760181 | 0.7087385885082398 | 0.5255172632918885 |
| 0.1817633034603787 | 0.6171498033361331 | 0.3440000218905865 |
| 0.3042769858626642 | 0.5963203878360090 | 0.2983921160970482 |
| 0.3004634861623074 | 0.6303242535177418 | 0.8601377349040717 |
| 0.3912843615793662 | 0.6293137699017350 | 0.6766422359430209 |
| 0.5095358447694665 | 0.7292767415933668 | 0.3821859810572761 |
| 0.6087079877354853 | 0.7235497048198454 | 0.2678425850566981 |
| 0.7202542825249552 | 0.4459524785272677 | 0.4293534499985441 |
| 0.6830034738730717 | 0.4107880748074138 | 0.8684357684792445 |
| 0.7737458456937247 | 0.4106046806504793 | 0.0548217921020253 |
| 0.6526319088986341 | 0.2688956371169411 | 0.0979141840989470 |
| 0.6535981220181455 | 0.3045522426640233 | 0.5361696179718081 |
| 0.5615724591548314 | 0.2163412086365284 | 0.7213534074224981 |
| 0.5353491414609337 | 0.3318622717764654 | 0.7613470054660283 |
| 0.5717669614297520 | 0.3310826615283062 | 0.2006916574174866 |
| 0.5745666649044239 | 0.4197944152946818 | 0.3851711468159991 |
| 0.4549117461149379 | 0.8410059106531449 | 0.5569636905574527 |
| 0.4437654416774635 | 0.8578911089904153 | 0.3426799020692215 |
| 0.4785641956937141 | 0.9296147046016756 | 0.2763108617061505 |
| 0.5275711597182706 | 0.9854832994448302 | 0.4105873900971133 |
| 0.5415120016657013 | 0.9679520182132251 | 0.6171531345862391 |
| 0.5066634448644010 | 0.8977215521749073 | 0.6891588066081624 |
| 0.3986830990283039 | 0.8030454175214601 | 0.1780368624092645 |
| 0.1650130027204000 | 0.6765606598180085 | 0.8823578815733484 |
| 0.1466175655116615 | 0.6474219997976860 | 0.6709765218654553 |
| 0.0721839522573973 | 0.6112486865251086 | 0.6035915571803159 |
| 0.0158587660682841 | 0.6065848876797730 | 0.7351383483944574 |
| 0.0357150616740114 | 0.6403246223125052 | 0.9374190843374919 |
| 0.1084789718413575 | 0.6748213516170054 | 0.0105031124496691 |
| 0.2034009030940140 | 0.6578359460749112 | 0.5091588664122639 |
| 0.3250987665241496 | 0.5527978975069203 | 0.2115207392057172 |
| 0.3523369548871429 | 0.5609155476526695 | 0.9969538797643978 |
| 0.3830465016723466 | 0.5202289524697434 | 0.9269481823259156 |

|                    |                    |                    |
|--------------------|--------------------|--------------------|
| 0.3832823868176760 | 0.4681660478625176 | 0.0592811499905537 |
| 0.3503649794635137 | 0.4564044241856919 | 0.2642568020135698 |
| 0.3214314910224800 | 0.4971168542576052 | 0.3396404853734794 |
| 0.3478101446805510 | 0.6099081254804233 | 0.8388887272706356 |
| 0.5490994675648224 | 0.7219867430004570 | 0.2316949679038700 |
| 0.5562041529457034 | 0.6965097438128041 | 0.8502389004283302 |
| 0.6291748245544042 | 0.7591621933520969 | 0.7702145521304828 |
| 0.7886814511745683 | 0.4863012278492320 | 0.5144005854142648 |
| 0.8077593648362154 | 0.4760045061847364 | 0.7266695421203266 |
| 0.8820832417132252 | 0.5150360295188960 | 0.7948204280903255 |
| 0.9374942092259602 | 0.5669307729073125 | 0.6630129054657843 |
| 0.9167416789880320 | 0.5801406374093503 | 0.4596745508318705 |
| 0.8441804779698714 | 0.5411709882817632 | 0.3858752062955659 |
| 0.7516818579741340 | 0.4291241451294994 | 0.8877639942403661 |
| 0.6267779125756405 | 0.2034725650675071 | 0.1843823696905815 |
| 0.5967044550113556 | 0.1845924165561783 | 0.3961124415675457 |
| 0.5636670694723662 | 0.1132901615699140 | 0.4658851349790396 |
| 0.5635029657735728 | 0.0606878109447706 | 0.3368739467051967 |
| 0.5985144533355253 | 0.0813501421735836 | 0.1345752833139287 |
| 0.6295074914477752 | 0.1508537885408145 | 0.0585668676922779 |
| 0.6034983517280210 | 0.2381941948189166 | 0.5557635258129494 |
| 0.4959017702189570 | 0.3594440293428391 | 0.8448676007034450 |
| 0.5080333723828332 | 0.3888101038488614 | 0.0558266015719653 |
| 0.4711311294627052 | 0.4243082758733081 | 0.1213255706309226 |
| 0.4192066499535443 | 0.4281130654937542 | 0.9884840311692287 |
| 0.4034226247664776 | 0.3938651942247660 | 0.7870080037053171 |
| 0.4404551089520368 | 0.3600400109613062 | 0.7156778544196669 |
| 0.5548068173836214 | 0.3800466690913993 | 0.2184339223591252 |
| 0.6801996474498821 | 0.8701896167470053 | 0.5379986367966225 |
| 0.6550136592421225 | 0.9037068994017048 | 0.3653088322571421 |
| 0.7335438828567362 | 0.9252572101024867 | 0.7001923065335589 |
| 0.4652547187105966 | 0.9406625400983444 | 0.1157502583623184 |
| 0.5810293830760216 | 0.0107682482470182 | 0.7220035762073636 |
| 0.5171477675452962 | 0.8848872666022771 | 0.8511476768017374 |
| 0.0595002073681670 | 0.5862643504513727 | 0.4448646632018622 |
| 0.9927080864409703 | 0.6395123368649962 | 0.0382045049137005 |
| 0.1235696878678425 | 0.7009029208380468 | 0.1674475970890015 |
| 0.4078517363585092 | 0.5312670920960656 | 0.7666482816782860 |
| 0.3478097653946648 | 0.4140999546635840 | 0.3659605620168804 |
| 0.2961511651062452 | 0.4877456877853774 | 0.4988586617647783 |
| 0.5669756912756441 | 0.6544959179269512 | 0.9063962964877987 |
| 0.6540725778951568 | 0.7402848930789432 | 0.6519388678173925 |
| 0.8954512245261341 | 0.5032287495727914 | 0.9543099687487313 |
| 0.9589842629911871 | 0.6223701420911567 | 0.3585055892879438 |
| 0.8284725430550850 | 0.5517103914206629 | 0.2281395410601021 |
| 0.5375283831090840 | 0.1000083273779353 | 0.6244882680580659 |



|                    |                    |                    |
|--------------------|--------------------|--------------------|
| 0.6015166562537644 | 0.0414461148894816 | 0.0360454366212366 |
| 0.6565115349777813 | 0.1664506977113689 | 0.9014989845585504 |
| 0.4849234309786610 | 0.4497481841208142 | 0.2793787565903401 |
| 0.3608490239366660 | 0.3939078295186533 | 0.6850150829469612 |
| 0.4281238338800293 | 0.3338863556264400 | 0.5588938077012315 |
| 0.5162952897295909 | 0.6755655096920279 | 0.7158369502314414 |
| 0.5689607914142343 | 0.7774719273486781 | 0.5360855364972608 |
| 0.5921331024228280 | 0.8313552227587238 | 0.7577948332138220 |
| 0.6674004021211104 | 0.7862180786442181 | 0.9047410194126044 |
| 0.4735916736317023 | 0.7119565550738258 | 0.9994323680996899 |
| 0.6294831400993530 | 0.9320532839873223 | 0.4372215352570947 |
| 0.6147932858250229 | 0.8632368000746595 | 0.2542081077119676 |
| 0.7034524631538588 | 0.9425417562478273 | 0.2711618177204258 |
| 0.7058629573034310 | 0.8431348393426532 | 0.4578386888054737 |
| 0.7818363884089905 | 0.9679611515097335 | 0.6152134836117753 |
| 0.7538564925663991 | 0.9019108861760472 | 0.8200985775904002 |
| 0.7065157534632789 | 0.9502341602840261 | 0.7860254957732167 |
| 0.5237345989881561 | 0.7164797945791079 | 0.0221980293043771 |
| 0.6141225856594374 | 0.8107150444757352 | 0.6523020368298162 |

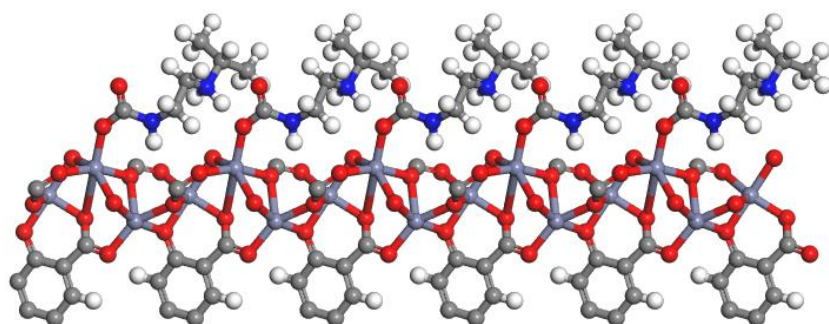

experimental-CO<sub>2</sub>-i-2-Zn<sub>2</sub>(dobpdc)

1.00000000000000

|                      |                     |                    |
|----------------------|---------------------|--------------------|
| 20.7993051444550048  | 0.0352024403159358  | 0.0021520845089441 |
| -11.1582362579628782 | 18.8928495231279570 | 0.0138335198209261 |
| -0.0835434969177921  | -0.0237370047184470 | 6.4897032480254335 |

|    |    |    |    |   |
|----|----|----|----|---|
| Zn | O  | C  | H  | N |
| 6  | 20 | 48 | 32 | 2 |

Direct

|                    |                    |                    |
|--------------------|--------------------|--------------------|
| 0.3303044665960044 | 0.7450527720258791 | 0.7930332580301638 |
| 0.2666195885797649 | 0.6525685115822100 | 0.1609476097021982 |
| 0.4048526193238260 | 0.6914270687015573 | 0.4464141932799777 |
| 0.6942308860882775 | 0.3590934027265362 | 0.2492744430035145 |
| 0.5848611298275515 | 0.2894491696860158 | 0.9130341760640164 |
| 0.6220801401998273 | 0.3921633407579108 | 0.5810126337564299 |
| 0.4266712301215634 | 0.7779084074026201 | 0.6211510259164683 |
| 0.3802463705029524 | 0.7397683882221813 | 0.2065410799622782 |
| 0.3888882428738043 | 0.8254158660989717 | 0.0036132367249806 |
| 0.2363877663837002 | 0.7077195840043444 | 0.9631165960535242 |
| 0.2720560853755316 | 0.7119381930979856 | 0.5302913465398191 |

|                    |                    |                    |
|--------------------|--------------------|--------------------|
| 0.1814685511570673 | 0.6225978437248614 | 0.3540643290318357 |
| 0.3162232861204259 | 0.6040952512233417 | 0.2970545411873218 |
| 0.3118242593951450 | 0.6416395596776354 | 0.8785882927890185 |
| 0.3931445075344087 | 0.6284535084067002 | 0.6884627242336236 |
| 0.5117115875065892 | 0.7221608829871684 | 0.3865413209474369 |
| 0.6174506856863289 | 0.7314303132950073 | 0.2668006288311560 |
| 0.7186563311608012 | 0.4445178390532405 | 0.4301037235896601 |
| 0.6797805445457428 | 0.4004059013255485 | 0.8468643471719162 |
| 0.7746338312794805 | 0.4146864262396264 | 0.0445564293960246 |
| 0.6516365047664792 | 0.2666919339839566 | 0.0974164974488403 |
| 0.6442594502763583 | 0.3034224922867210 | 0.5131033066185751 |
| 0.5642716007286026 | 0.2133403576776729 | 0.7069820883980427 |
| 0.5299101637609667 | 0.3287492643959311 | 0.7571977069390812 |
| 0.5771835337737059 | 0.3360869389307055 | 0.1765969712633009 |
| 0.5639410020276472 | 0.4122333668048412 | 0.3709361587865061 |
| 0.4580998493546815 | 0.8435941394401070 | 0.5420203126602843 |
| 0.4471778018680865 | 0.8596227537857288 | 0.3351884961153075 |
| 0.4807035134003783 | 0.9305635417647693 | 0.2728553701575507 |
| 0.5266709645037437 | 0.9869390565175777 | 0.4029627617202820 |
| 0.5386220203304148 | 0.9706677824046537 | 0.6045460012385604 |
| 0.5056890103706166 | 0.9012896183132426 | 0.6719540110358864 |
| 0.4026189850609967 | 0.8057561845380903 | 0.1749430295817689 |
| 0.1667438299800779 | 0.6761376603568934 | 0.8822693935805646 |
| 0.1483628338618104 | 0.6487633768973211 | 0.6775106714262051 |
| 0.0731315052078187 | 0.6112796595731709 | 0.6138270176407161 |
| 0.0155848603217876 | 0.6029982545198962 | 0.7403972704803934 |
| 0.0349222918462857 | 0.6340520741299613 | 0.9375405524540383 |
| 0.1083469169592490 | 0.6696428453274521 | 0.0071068292944858 |
| 0.2038613525090014 | 0.6610839958910191 | 0.5167575978231724 |
| 0.3314449471374417 | 0.5578109146330092 | 0.2066689231254841 |
| 0.3538062128313300 | 0.5630968256084330 | 0.9975545914900437 |
| 0.3804861285994150 | 0.5196715477900042 | 0.9260567906637505 |
| 0.3819569182944065 | 0.4684258225740905 | 0.0504179667098654 |
| 0.3534129018431074 | 0.4596085637139637 | 0.2508535969211607 |
| 0.3283118519195725 | 0.5026537644038029 | 0.3271924832738264 |
| 0.3529467661441785 | 0.6141233707634015 | 0.8476851064427819 |
| 0.5540172355623270 | 0.7223837142321017 | 0.2355177012945475 |
| 0.5590144554157703 | 0.6989030366767608 | 0.8683341173051602 |
| 0.6296915990929932 | 0.7622393938507912 | 0.7863141902924440 |
| 0.7874277642776875 | 0.4832123107717905 | 0.5167219704375157 |
| 0.8058543437498500 | 0.4737733227118994 | 0.7221003179234415 |
| 0.8806502978209352 | 0.5131595626090686 | 0.7905690060687789 |
| 0.9371582722658900 | 0.5633071039724271 | 0.6668980487474627 |
| 0.9170899019849017 | 0.5747253662739169 | 0.4686137631677525 |
| 0.8443345351984419 | 0.5359438989271013 | 0.3951012074540685 |
| 0.7509610037851502 | 0.4266644851488408 | 0.8758212293220069 |

|                    |                    |                    |
|--------------------|--------------------|--------------------|
| 0.6245777461718163 | 0.2021473799359725 | 0.1824197755913914 |
| 0.5960662447498422 | 0.1843128936493628 | 0.3861842365300134 |
| 0.5637729527707904 | 0.1138075928905025 | 0.4530708917874406 |
| 0.5615113678548269 | 0.0608094624834408 | 0.3300688507246434 |
| 0.5937732642990099 | 0.0801541288077772 | 0.1337373185671638 |
| 0.6244227089555352 | 0.1487038757952206 | 0.0613006665464439 |
| 0.6008050537101894 | 0.2361397312465527 | 0.5404434472292365 |
| 0.4922678721558071 | 0.3580025334621411 | 0.8393870080783969 |
| 0.5038931179931083 | 0.3855835966267733 | 0.0435499239101631 |
| 0.4667222864178697 | 0.4208747200065091 | 0.1062544444502436 |
| 0.4163116431897294 | 0.4276102990019623 | 0.9787463454119489 |
| 0.4017557811468180 | 0.3960932365716445 | 0.7822296640146860 |
| 0.4384820020320674 | 0.3620855356152362 | 0.7141858498327593 |
| 0.5513494745232137 | 0.3783442509601045 | 0.2020475119925038 |
| 0.6779640533183979 | 0.8702441174110263 | 0.5581641535811528 |
| 0.6518764985946959 | 0.9006692583395832 | 0.3863751199937298 |
| 0.7274750000513137 | 0.9261489580057400 | 0.7168701346793540 |
| 0.4683285285886853 | 0.9403682970826566 | 0.1166184008692568 |
| 0.5754395509921437 | 0.0136189109708553 | 0.7087338014766686 |
| 0.5147559923434315 | 0.8895555128015928 | 0.8296529623132756 |
| 0.0610129797492789 | 0.5884292454177356 | 0.4593832950674326 |
| 0.9912021902593580 | 0.6306829489065109 | 0.0366163611322108 |
| 0.1228260064719109 | 0.6936956076831322 | 0.1598551271367867 |
| 0.4020186028020731 | 0.5285330828844863 | 0.7697169529659931 |
| 0.3515271971002036 | 0.4180462556061499 | 0.3481613003868844 |
| 0.3068800184951002 | 0.4959624516001497 | 0.4831758113721847 |
| 0.5736028376806033 | 0.6594120203755836 | 0.9189059165249702 |
| 0.6570859083988410 | 0.7439264267996748 | 0.6803027879286319 |
| 0.8934029269952575 | 0.5025930122958329 | 0.9454741984546686 |
| 0.9599001689654543 | 0.6154720705116716 | 0.3715235920240687 |
| 0.8293386341620419 | 0.5452064246299599 | 0.2414003083632394 |
| 0.5395310325799585 | 0.1015943546988183 | 0.6063460106805323 |
| 0.5951892245971351 | 0.0401699888485894 | 0.0373990214209314 |
| 0.6494202188726348 | 0.1632522209101808 | 0.9092312932622448 |
| 0.4796806918556840 | 0.4442694121004109 | 0.2599488755853869 |
| 0.3603781519237188 | 0.3981869341208082 | 0.6819446294176785 |
| 0.4269856795217706 | 0.3379546332864720 | 0.5615861768533179 |
| 0.5168699166625643 | 0.6752538175039362 | 0.7442583091674848 |
| 0.5709955423846225 | 0.7753135699500646 | 0.5465385961961218 |
| 0.5847238695740415 | 0.8279165669510178 | 0.7513516232393087 |
| 0.6678450859836076 | 0.7925409035898099 | 0.9129941643252266 |
| 0.4723264905609170 | 0.7044334532941150 | 0.0224597256156471 |
| 0.6229413794083811 | 0.9267321371863915 | 0.4476496498435480 |
| 0.6144461411628512 | 0.8596939456427961 | 0.2766850055165335 |
| 0.7008035789927192 | 0.9403532527499365 | 0.3015080078207006 |
| 0.7072086015886185 | 0.8455237300163247 | 0.4889674787939811 |

|                    |                    |                    |
|--------------------|--------------------|--------------------|
| 0.7753944858714092 | 0.9697910680233264 | 0.6392444661100427 |
| 0.7492885247689500 | 0.9054919471043235 | 0.8358005037106722 |
| 0.6967850281229317 | 0.9484758004389491 | 0.7924948437505677 |
| 0.5260458406490542 | 0.7164391715887461 | 0.0376532499143138 |
| 0.6116067718881553 | 0.8093485841790269 | 0.6614932023232001 |

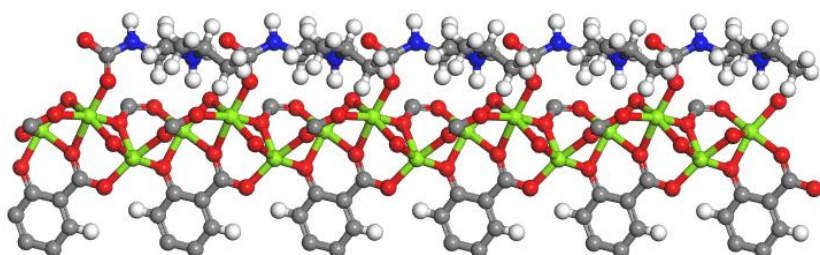

more stable-CO<sub>2</sub>-i-2-Mg<sub>2</sub>(dobpdc)

1.0000000000000000

|                      |                     |                     |
|----------------------|---------------------|---------------------|
| 20.6958607337306439  | -0.0479833189707348 | 0.0833919165801392  |
| -10.5507593815711438 | 18.9375203705499722 | -0.0030967704903045 |
| -0.0478151452747300  | -0.0315813312894308 | 6.8276917183737513  |

|    |    |    |    |   |
|----|----|----|----|---|
| Mg | O  | C  | H  | N |
| 6  | 20 | 48 | 32 | 2 |

Direct

|                    |                    |                    |
|--------------------|--------------------|--------------------|
| 0.3519081900564061 | 0.7378308064044106 | 0.8096281875933897 |
| 0.2846598601802697 | 0.6465709166416858 | 0.1538534837483851 |
| 0.3989491360378494 | 0.6795037384450424 | 0.4641632173758978 |
| 0.7162901672908575 | 0.3522538588687354 | 0.2059934648604198 |
| 0.6178710137802028 | 0.2853589570466823 | 0.8714980987763639 |
| 0.6449996769503201 | 0.3789920980740717 | 0.5377526892666538 |
| 0.4336645097660039 | 0.7734215975012049 | 0.6133143048444722 |
| 0.3721308173901434 | 0.7337395674916394 | 0.2545518616180189 |
| 0.4070435095736613 | 0.8134521208257652 | 0.0152579569095366 |
| 0.2518958179684319 | 0.6926699423813290 | 0.9464396545400575 |
| 0.2943433254701304 | 0.6712346923233454 | 0.5839282065524785 |
| 0.2063644783212908 | 0.6209378328556667 | 0.3546591439333753 |
| 0.3317942535951488 | 0.5940050153554566 | 0.2837912768323818 |
| 0.3514204104011114 | 0.6506619095118964 | 0.9247839946400234 |
| 0.4091661169659844 | 0.6214049010046026 | 0.6987782342020026 |
| 0.4943903456855239 | 0.7020810132941264 | 0.3280644396651482 |
| 0.6004013777432604 | 0.7768371650857091 | 0.4908142163324953 |
| 0.7452424118138978 | 0.4308456608354660 | 0.4061509863567494 |
| 0.7058823814346695 | 0.3758153138893832 | 0.7698121713624317 |
| 0.7927813090616453 | 0.4067224659663111 | 0.0000884687028417 |
| 0.6699058169864927 | 0.2562715551819750 | 0.0721654776705094 |
| 0.6513434533804769 | 0.2943385198243149 | 0.4351562134933076 |
| 0.5972550982700398 | 0.2117900940263056 | 0.6641869196130088 |
| 0.5628229871216561 | 0.3308036167770823 | 0.7378387882999746 |
| 0.6210525556579327 | 0.3476953003425010 | 0.1027390207142389 |
| 0.5888325778070680 | 0.4009278239810428 | 0.3313569014351216 |

|                    |                    |                    |
|--------------------|--------------------|--------------------|
| 0.4714849572180384 | 0.8376047991502631 | 0.5319954886936102 |
| 0.4633065294412830 | 0.8521152612481657 | 0.3314014345401191 |
| 0.5025321718758420 | 0.9217824937398760 | 0.2614373735317912 |
| 0.5506417301749380 | 0.9782196809293566 | 0.3793568805977969 |
| 0.5605907233673122 | 0.9629423840909013 | 0.5744156565368357 |
| 0.5225398518514979 | 0.8949380495438533 | 0.6483935593832157 |
| 0.4118404314747934 | 0.7975900710901200 | 0.1923164565020770 |
| 0.1837890987615296 | 0.6623110531580778 | 0.8670601620532423 |
| 0.1685518244167881 | 0.6378514532218773 | 0.6691582001464624 |
| 0.0950777370066760 | 0.6040898909370256 | 0.6006519309885192 |
| 0.0357190066819513 | 0.5939384543649524 | 0.7179953812029041 |
| 0.0516953876758492 | 0.6202350048398486 | 0.9112875428924312 |
| 0.1234875909881907 | 0.6536505408976652 | 0.9837575305329551 |
| 0.2260800316710316 | 0.6434817918173437 | 0.5292065396123391 |
| 0.3523701900627287 | 0.5509980891603945 | 0.2006692524118137 |
| 0.3750326184721260 | 0.5563997330080852 | 0.9999004685979429 |
| 0.3991584919513258 | 0.5105318251831932 | 0.9271381077827598 |
| 0.4022614404634410 | 0.4591168828039898 | 0.0425628276594807 |
| 0.3770462700088970 | 0.4522096778414806 | 0.2373868662545178 |
| 0.3524757590634096 | 0.4961952015840581 | 0.3137347139855962 |
| 0.3784988320759339 | 0.6116729046699305 | 0.8672462794350153 |
| 0.5611439119717332 | 0.7535881068218799 | 0.3352035531185535 |
| 0.5661846177503662 | 0.7557690204440135 | 0.9695914705158444 |
| 0.5907549536483572 | 0.7013854384107177 | 0.9188661673882166 |
| 0.8124159652380598 | 0.4705700537893449 | 0.4885039246053182 |
| 0.8291320672299278 | 0.4640456694365227 | 0.6886340974327680 |
| 0.9018912106365633 | 0.5054386833972657 | 0.7592171438872128 |
| 0.9590469934447299 | 0.5543063283251541 | 0.6424328091162081 |
| 0.9412474461553089 | 0.5619909979978175 | 0.4475497448280734 |
| 0.8703198453076340 | 0.5215880259627070 | 0.3727194499728768 |
| 0.7741342203972295 | 0.4132923257750534 | 0.8268746149114037 |
| 0.6445568589716828 | 0.1918680398362937 | 0.1531759031760842 |
| 0.6209226614497680 | 0.1761003363572655 | 0.3526289695620193 |
| 0.5917220832095538 | 0.1064653946437844 | 0.4218689542020897 |
| 0.5860207649071043 | 0.0514382758154426 | 0.3044945986685050 |
| 0.6119982281757714 | 0.0682057838637746 | 0.1103937391028396 |
| 0.6403774384107663 | 0.1361143441644117 | 0.0368009338700688 |
| 0.6226373490423711 | 0.2290854187453348 | 0.4913701272764754 |
| 0.5223385671233984 | 0.3572587208645004 | 0.8180190658877891 |
| 0.5294114104562624 | 0.3797645710309254 | 0.0180503217051609 |
| 0.4874390758422393 | 0.4102112084182892 | 0.0864897418405235 |
| 0.4377016084937608 | 0.4190060657847994 | 0.9678787900746784 |
| 0.4289096732027815 | 0.3941487521702243 | 0.7732856840274138 |
| 0.4697074782410624 | 0.3641167166679224 | 0.7005755854927003 |
| 0.5821244133521262 | 0.3763615186590243 | 0.1582976747732161 |
| 0.5971271453332463 | 0.6263209651139761 | 0.6391688469927033 |

|                    |                    |                    |
|--------------------|--------------------|--------------------|
| 0.5491672383425055 | 0.5818876886425670 | 0.4682555544948670 |
| 0.6074348842872155 | 0.5805255461484293 | 0.7921590407335088 |
| 0.4917449809014016 | 0.9307198200754740 | 0.1105640734633653 |
| 0.5996163376432264 | 0.0057766447280798 | 0.6688680317463707 |
| 0.5303685614542459 | 0.8837867061298752 | 0.7997950921837997 |
| 0.0855569163031547 | 0.5836635508025196 | 0.4512345653871037 |
| 0.0065818531002790 | 0.6147664009676177 | 0.0053295303388978 |
| 0.1353666256596426 | 0.6738724998659649 | 0.1335094904699190 |
| 0.4174765935050004 | 0.5174397654855980 | 0.7751453973144891 |
| 0.3767538303128575 | 0.4108598297659043 | 0.3293809269462216 |
| 0.3326776920098382 | 0.4902518750401512 | 0.4642536634378516 |
| 0.5757237201606600 | 0.7129740705580758 | 0.6222706621112053 |
| 0.5860428621527163 | 0.7974908323095420 | 0.8569947363969135 |
| 0.5055523456065032 | 0.7307509019365810 | 0.9729618298171303 |
| 0.6516031418929487 | 0.7275247585043019 | 0.9158468030027720 |
| 0.5704731408011838 | 0.6596771057330955 | 0.0303355825793545 |
| 0.9128302953509078 | 0.4963554803912444 | 0.9097843000141310 |
| 0.9844935152924847 | 0.6010749178148984 | 0.3536920716704302 |
| 0.8575143458539074 | 0.5279095090724795 | 0.2213516964451259 |
| 0.5712179470746435 | 0.0962803085648574 | 0.5718779412317971 |
| 0.6100118066643958 | 0.0266018215693578 | 0.0160458284490801 |
| 0.6600524641978183 | 0.1481469494651364 | 0.8861442192704487 |
| 0.4973032525649401 | 0.4296650595482063 | 0.2369412543414740 |
| 0.3887851568102789 | 0.3984409616047344 | 0.6780294196017778 |
| 0.4624670475673298 | 0.3451794690072987 | 0.5496882572336261 |
| 0.5056316395855092 | 0.6391308421142128 | 0.7225343734300438 |
| 0.5355020864439979 | 0.6129701106868168 | 0.3665344415141760 |
| 0.4967060495282638 | 0.5381861397230168 | 0.5217392224758655 |
| 0.5778463752560867 | 0.5584011050741182 | 0.3880510214748512 |
| 0.6485632025101893 | 0.8230457563082467 | 0.1743025262017781 |
| 0.6472487526187933 | 0.6117805428346088 | 0.9070597483113616 |
| 0.6286196663820149 | 0.5489123316570925 | 0.7188899265623760 |
| 0.5546737783653910 | 0.5433118332544282 | 0.8611972670759300 |
| 0.6517216707456797 | 0.6664432268343674 | 0.5845739408282355 |
| 0.5944876276654156 | 0.7858347469730873 | 0.1611780720192471 |
| 0.5633444639827019 | 0.6687588630953627 | 0.7222574643150637 |

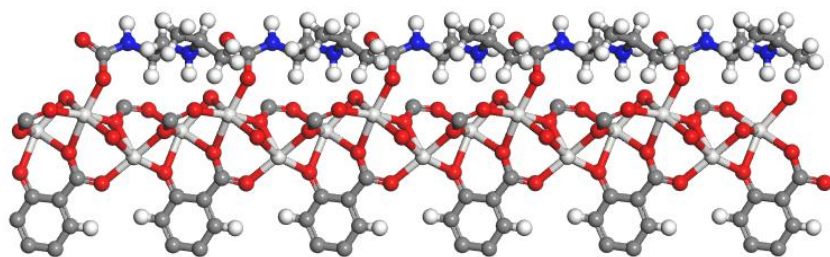

more stable-CO<sub>2</sub>-i-2-Sc<sub>2</sub>(dobpdc)

1.00000000000000

20.9457392319287656    0.1181660818397488    0.2902775512286061

|                      |                     |                    |    |   |
|----------------------|---------------------|--------------------|----|---|
| -10.5260148216412190 | 19.1821289213863508 | 0.0375917549417749 |    |   |
| 0.0166400929636377   | 0.0197033130358603  | 7.2473250222791705 |    |   |
| Sc                   | O                   | C                  | H  | N |
| 6                    | 20                  | 48                 | 32 | 2 |

Direct

|                    |                    |                    |
|--------------------|--------------------|--------------------|
| 0.3530210070186020 | 0.7505966321163079 | 0.8175941435515666 |
| 0.2802387960152344 | 0.6520712933951238 | 0.1403468842129345 |
| 0.3932341852704175 | 0.6747656165927086 | 0.4757577340085266 |
| 0.7233076923099028 | 0.3555958115976269 | 0.1935262516321933 |
| 0.6195057617708203 | 0.2804777664298751 | 0.8649314907226163 |
| 0.6428278013648174 | 0.3790198089199187 | 0.5289784666117954 |
| 0.4423520064455302 | 0.7741993751976537 | 0.6050838082007165 |
| 0.3759439124003972 | 0.7379226623490152 | 0.2681090428682907 |
| 0.4121665121052098 | 0.8194339913199237 | 0.0443394835448908 |
| 0.2408702141409294 | 0.6960856162663172 | 0.9353740945783051 |
| 0.2927908253180938 | 0.6772784681134288 | 0.5909343829094156 |
| 0.2095172294076091 | 0.6365757189325587 | 0.3680060905758817 |
| 0.3303623494761168 | 0.5957964679475606 | 0.2746736832471857 |
| 0.3495043488581409 | 0.6520008117825860 | 0.9212979989479523 |
| 0.4039048891737475 | 0.6176230948637251 | 0.7048513766910659 |
| 0.4906884467634151 | 0.6939663020700846 | 0.3354215776559952 |
| 0.5966682931883766 | 0.7648967759025981 | 0.4756602513702741 |
| 0.7540094086092124 | 0.4369563097011271 | 0.4054386133344690 |
| 0.7102841479981865 | 0.3862688621264616 | 0.7623691510560228 |
| 0.7969209533311818 | 0.4198461776805271 | 0.9730743951603993 |
| 0.6745768724650285 | 0.2495322125142874 | 0.0768102659961723 |
| 0.6649357905991961 | 0.2911755632531294 | 0.4320950664502297 |
| 0.6117361768647083 | 0.2080188150147022 | 0.6479104636260923 |
| 0.5580648033334193 | 0.3303818237196353 | 0.7477771542970769 |
| 0.6113457500216590 | 0.3380765845167033 | 0.1012092930580133 |
| 0.5780287672279629 | 0.3916086343421836 | 0.3148035539418059 |
| 0.4781698041597651 | 0.8383714010186626 | 0.5251410254124474 |
| 0.4694531263982308 | 0.8528364510306896 | 0.3362718952644063 |
| 0.5093416215412304 | 0.9221667441912317 | 0.2703319419339505 |
| 0.5561771965089670 | 0.9768047753680219 | 0.3798331638936230 |
| 0.5645771329819295 | 0.9613082583431045 | 0.5643853114111645 |
| 0.5263625280342793 | 0.8937146622749816 | 0.6340394023561353 |
| 0.4184275050189218 | 0.8023528382141285 | 0.2104870044452782 |
| 0.1752445609740060 | 0.6656879606149105 | 0.8547062862762210 |
| 0.1666237445071005 | 0.6459448654767729 | 0.6645181205499088 |
| 0.0950618404515013 | 0.6130215682151465 | 0.5953820343587650 |
| 0.0340601092751628 | 0.5993712398804096 | 0.7029060420720565 |
| 0.0445493167639985 | 0.6209333326590329 | 0.8890043096386611 |
| 0.1136329966539394 | 0.6533011242608229 | 0.9619773290358784 |
| 0.2246731119317704 | 0.6536738906327164 | 0.5378471085489264 |
| 0.3546458481553134 | 0.5541064148220518 | 0.1945338501293748 |

|                    |                    |                    |
|--------------------|--------------------|--------------------|
| 0.3760005918412925 | 0.5599671435370714 | 0.0014171252746443 |
| 0.4008299557422416 | 0.5135087510701816 | 0.9362684980891497 |
| 0.4065113906343977 | 0.4647266185154580 | 0.0485691420508899 |
| 0.3845111032297565 | 0.4597533316381873 | 0.2357258519267276 |
| 0.3588154270936439 | 0.5035906958515118 | 0.3047157793963097 |
| 0.3759782274626133 | 0.6102026586057798 | 0.8740094105437398 |
| 0.5577831518016689 | 0.7430105420606413 | 0.3340971651379968 |
| 0.5568077930540817 | 0.7439349309872525 | 0.9869986856714116 |
| 0.5838683957312479 | 0.6937804082957031 | 0.9189882317255333 |
| 0.8188745823196802 | 0.4760881462879891 | 0.4822965121667940 |
| 0.8320476741659029 | 0.4723801373758391 | 0.6747784423320983 |
| 0.9028771085545197 | 0.5143492850208974 | 0.7400762705942734 |
| 0.9604314477329478 | 0.5597013491211188 | 0.6273005757361476 |
| 0.9460652514677989 | 0.5633722180218791 | 0.4384990654060066 |
| 0.8774711261685335 | 0.5227192788895252 | 0.3687115638478444 |
| 0.7783201275303562 | 0.4248452384663292 | 0.8084544154467804 |
| 0.6495681587240734 | 0.1865210017573534 | 0.1568233332004760 |
| 0.6311532904577207 | 0.1731694004837193 | 0.3499359918172125 |
| 0.6023196851785489 | 0.1041768989200695 | 0.4172336676042185 |
| 0.5916358220813276 | 0.0487136126143161 | 0.3055137441765638 |
| 0.6118864364254641 | 0.0632718846641320 | 0.1167433654681141 |
| 0.6398201148728747 | 0.1300521608553512 | 0.0451166231009757 |
| 0.6359865743193409 | 0.2254623016165877 | 0.4818324754320611 |
| 0.5197160125338992 | 0.3584860135742590 | 0.8271792742060209 |
| 0.5253278422091844 | 0.3770201486707827 | 0.0186982413204955 |
| 0.4851138088682925 | 0.4094240768800129 | 0.0849153407416711 |
| 0.4400038284696671 | 0.4235560675443391 | 0.9744857329989474 |
| 0.4331336522785635 | 0.4025743903299823 | 0.7880791062972994 |
| 0.4721218317919877 | 0.3711928566202387 | 0.7171789038303154 |
| 0.5727510611361705 | 0.3686404775276079 | 0.1494854828761135 |
| 0.5904534914569092 | 0.6219449431891582 | 0.6504630077034002 |
| 0.5430636289299752 | 0.5782922020949843 | 0.4936310912541993 |
| 0.6020300980113767 | 0.5770515792538007 | 0.7934400144130043 |
| 0.4993357851593465 | 0.9321537752006883 | 0.1291710438596893 |
| 0.6019075752397801 | 0.0025559830447562 | 0.6535348379941965 |
| 0.5332871833754946 | 0.8820719518288977 | 0.7767114712761827 |
| 0.0888431183884492 | 0.5955060518560374 | 0.4530554355677173 |
| 0.9980578875692350 | 0.6125863072113797 | 0.9761685972286487 |
| 0.1219156681516741 | 0.6702110209163270 | 0.1053816369877884 |
| 0.4167098162593033 | 0.5177894925551081 | 0.7908901172122961 |
| 0.3863727837909110 | 0.4207170783688765 | 0.3261977926209961 |
| 0.3412117960090176 | 0.4994724837165028 | 0.4490810471638459 |
| 0.5693933641233456 | 0.7065165017975402 | 0.6356956122819960 |
| 0.5716541863964487 | 0.7867153234337790 | 0.8863136237101840 |
| 0.4974868272261044 | 0.7168522609483192 | 0.0045730363786790 |
| 0.6435342568429375 | 0.7210688671590849 | 0.9095795259834587 |



|                    |                    |                    |
|--------------------|--------------------|--------------------|
| 0.5664934738640458 | 0.6504828459909565 | 0.0179638544335443 |
| 0.9117514756786211 | 0.5081462202511752 | 0.8851323520204222 |
| 0.9895891969962358 | 0.5992051228108087 | 0.3459933745035288 |
| 0.8670071645340609 | 0.5258054089748176 | 0.2226364242134713 |
| 0.5858466252982805 | 0.0952249196773464 | 0.5624820046782278 |
| 0.6058578703535265 | 0.0212507719947743 | 0.0257463001328001 |
| 0.6550441213535529 | 0.1407077418948257 | 0.8990452979893578 |
| 0.4929025608181108 | 0.4258711814104161 | 0.2282803235639891 |
| 0.3963319830790016 | 0.4107558978137297 | 0.6987515332168931 |
| 0.4668947729509955 | 0.3554981782631143 | 0.5728881197137704 |
| 0.5002589978771216 | 0.6357519282286920 | 0.7353644772701623 |
| 0.5304572350108322 | 0.6089953007170855 | 0.3953496225386661 |
| 0.4913684595429768 | 0.5363280723779108 | 0.5477517907803112 |
| 0.5707846848525349 | 0.5537465361726186 | 0.4189409772607847 |
| 0.6413521020982407 | 0.8081089511757565 | 0.1686523808192558 |
| 0.6422258059982109 | 0.6076801497888982 | 0.8966015054767834 |
| 0.6222939345680990 | 0.5454321331879644 | 0.7213194300110978 |
| 0.5510653415384228 | 0.5409002584738859 | 0.8645328794029042 |
| 0.6433870345027225 | 0.6614318736808853 | 0.5941162248354910 |
| 0.5883279459665839 | 0.7716001001413126 | 0.1646914176056707 |
| 0.5569830174757121 | 0.6644922969252762 | 0.7327141739030597 |

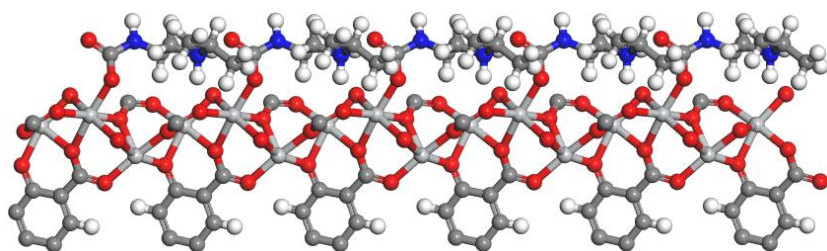

more stable-CO<sub>2</sub>-i-2-Ti<sub>2</sub>(dobpdc)

1.00000000000000

|                      |                     |                     |
|----------------------|---------------------|---------------------|
| 20.7899631954616915  | -0.0104592072877392 | 0.0545709047901799  |
| -10.5762569852356449 | 18.8784995122783634 | -0.0080282248866451 |
| -0.0645127117650199  | -0.0359898626493196 | 7.0438737109049576  |

| Ti | O  | C  | H  | N |
|----|----|----|----|---|
| 6  | 20 | 48 | 32 | 2 |

Direct

|                    |                    |                    |
|--------------------|--------------------|--------------------|
| 0.3579303024811461 | 0.7438325544207804 | 0.8139434054143465 |
| 0.2804812085785610 | 0.6465189797780964 | 0.1546255802630697 |
| 0.3924908704247279 | 0.6748241029559910 | 0.4760952508182165 |
| 0.7233265324889201 | 0.3603101287256839 | 0.1985781927046288 |
| 0.6195645375575047 | 0.2838821111380215 | 0.8636429483179814 |
| 0.6424536443830993 | 0.3830981652178448 | 0.5305669637946619 |
| 0.4412302860704620 | 0.7773383307927314 | 0.6115146373619262 |
| 0.3767227404280759 | 0.7363448804982675 | 0.2637322353407394 |
| 0.4136560380164628 | 0.8164720861282800 | 0.0307604461232561 |
| 0.2515190499551678 | 0.6983874182771924 | 0.9448808693377267 |

|                    |                    |                    |
|--------------------|--------------------|--------------------|
| 0.2923984995664131 | 0.6715034378379328 | 0.5966785306744024 |
| 0.2061858439232699 | 0.6292372805245434 | 0.3677861397452274 |
| 0.3270540378346793 | 0.5883974204645860 | 0.2809029468407591 |
| 0.3483326526685284 | 0.6483397279691591 | 0.9315688056050250 |
| 0.4040193327610876 | 0.6176442303642190 | 0.7094858090759576 |
| 0.4902227255646997 | 0.6930487956336464 | 0.3264636782627923 |
| 0.5959501039298656 | 0.7662552086498041 | 0.4885382222173951 |
| 0.7500204864597650 | 0.4401749698007499 | 0.4050647527193253 |
| 0.7092229991018661 | 0.3832377886937035 | 0.7592422527439733 |
| 0.7965156337908380 | 0.4165399700876176 | 0.9834496129476763 |
| 0.6753694349840929 | 0.2566574356834023 | 0.0699876405581602 |
| 0.6578678484545881 | 0.2969132720712756 | 0.4249275928600527 |
| 0.6044795334746128 | 0.2132392690820533 | 0.6456944535998783 |
| 0.5595126899413326 | 0.3311651437451108 | 0.7346413222716857 |
| 0.6193118152355467 | 0.3477121468983123 | 0.0912211701381879 |
| 0.5849749116118340 | 0.3995417662424109 | 0.3130122510516254 |
| 0.4801762385756638 | 0.8414808114045479 | 0.5298435491030139 |
| 0.4723889289827616 | 0.8542499000693508 | 0.3337185963166718 |
| 0.5134893508640811 | 0.9238335538646634 | 0.2638325899489488 |
| 0.5613244321914379 | 0.9806632087768903 | 0.3776282664862738 |
| 0.5698465030616208 | 0.9665708159818438 | 0.5693176260952897 |
| 0.5303740353892387 | 0.8988238504523876 | 0.6430062501095040 |
| 0.4196061696608757 | 0.8005097147779430 | 0.2033028849079248 |
| 0.1835647451235219 | 0.6692051039195265 | 0.8658044322160310 |
| 0.1691818524446995 | 0.6468692335901545 | 0.6717293417563651 |
| 0.0959186349963273 | 0.6156156634641373 | 0.6035512454018505 |
| 0.0370764721189928 | 0.6053418122835285 | 0.7174511512828935 |
| 0.0526520863409878 | 0.6290335613875299 | 0.9077265551196648 |
| 0.1240721713790164 | 0.6603359544816788 | 0.9795150911226805 |
| 0.2248390196268185 | 0.6496638910688228 | 0.5407332602396971 |
| 0.3477669627307898 | 0.5454263421269929 | 0.1963275483040500 |
| 0.3700456372790421 | 0.5522028102483579 | 0.0011284173758447 |
| 0.3930736397697849 | 0.5053800581125552 | 0.9293707234125309 |
| 0.3963041892203089 | 0.4537036668730073 | 0.0401027179048321 |
| 0.3723830899112467 | 0.4466054462453075 | 0.2300130500196310 |
| 0.3482095893111065 | 0.4908964843646990 | 0.3047841533701865 |
| 0.3739796923649923 | 0.6073681553003968 | 0.8756453308086489 |
| 0.5575128438007443 | 0.7433482739142246 | 0.3364906460028939 |
| 0.5621235083770592 | 0.7464185634129011 | 0.9810575324297204 |
| 0.5863579067365071 | 0.6927966620167965 | 0.9209843938395922 |
| 0.8163843592136905 | 0.4810276049715604 | 0.4882200787475059 |
| 0.8314990322331440 | 0.4746381322240475 | 0.6836881324003824 |
| 0.9037342671063995 | 0.5175846464651450 | 0.7542277740111482 |
| 0.9608836928850316 | 0.5663453363765785 | 0.6418609505962611 |
| 0.9442342713346574 | 0.5733041822822922 | 0.4509260049285077 |
| 0.8739528505962980 | 0.5318431337884489 | 0.3764580201004451 |

|                    |                    |                    |
|--------------------|--------------------|--------------------|
| 0.7773691781019553 | 0.4230267476293791 | 0.8138439647321694 |
| 0.6516750174622511 | 0.1926928739693356 | 0.1515019489735375 |
| 0.6301291556282237 | 0.1785855304260182 | 0.3462569114898663 |
| 0.6028661654319613 | 0.1091220342788457 | 0.4152194936330356 |
| 0.5965706151952076 | 0.0536119046562587 | 0.3022192587652958 |
| 0.6200379529063581 | 0.0690640533729644 | 0.1119287598377690 |
| 0.6468515659076858 | 0.1366925605257072 | 0.0388685578178714 |
| 0.6307024577048327 | 0.2312259606065650 | 0.4774425234102183 |
| 0.5177528576722205 | 0.3558474458429136 | 0.8153816522538957 |
| 0.5248657333373826 | 0.3765497263578880 | 0.0111054218610003 |
| 0.4811655083233287 | 0.4049780584626575 | 0.0793489049677247 |
| 0.4315763914554022 | 0.4139441023652728 | 0.9648704485548777 |
| 0.4235895755982773 | 0.3911611397106121 | 0.7739497031447605 |
| 0.4655294727676189 | 0.3627123488003752 | 0.7017531744775032 |
| 0.5780911518358743 | 0.3745394290461116 | 0.1432389520891456 |
| 0.5897556114249013 | 0.6178062720988780 | 0.6461583058461318 |
| 0.5407294310722031 | 0.5736320642926784 | 0.4813192537599513 |
| 0.6001869695321379 | 0.5715520023962679 | 0.7929643252298173 |
| 0.5035845471465640 | 0.9325653813913294 | 0.1166565536735555 |
| 0.6083669545460764 | 0.0097668107368802 | 0.6609691667913912 |
| 0.5368099230980550 | 0.8882078447415365 | 0.7914505977115368 |
| 0.0860558997377959 | 0.5962284050439556 | 0.4576439262105369 |
| 0.0079111222031825 | 0.6231024478744684 | 0.9996700854898752 |
| 0.1359519414159036 | 0.6787069732650813 | 0.1265410790626247 |
| 0.4108591960993943 | 0.5121042747671618 | 0.7818848560061823 |
| 0.3727403930171525 | 0.4054232755907309 | 0.3188350516238121 |
| 0.3295130889549051 | 0.4853118745585022 | 0.4514725448935388 |
| 0.5702361900565166 | 0.7051653784508368 | 0.6305598673447169 |
| 0.5808153375064792 | 0.7895656863020039 | 0.8761979764502065 |
| 0.5017811614431168 | 0.7209331306971546 | 0.9885758678256268 |
| 0.6469124839435746 | 0.7191360649487224 | 0.9152931418016935 |
| 0.5670961080815790 | 0.6499409605201880 | 0.0256361638818409 |
| 0.9144628120667755 | 0.5091125867500313 | 0.9009249887334043 |
| 0.9875077040232318 | 0.6121678565522671 | 0.3602712638791435 |
| 0.8615768222653638 | 0.5371120417547602 | 0.2283847566771338 |
| 0.5835410620724844 | 0.0993036311439146 | 0.5613452912326524 |
| 0.6172355057213350 | 0.0270267800677324 | 0.0205687354130128 |
| 0.6646185872672642 | 0.1481919067976756 | 0.8914282848034919 |
| 0.4902243984912241 | 0.4235211594995911 | 0.2260515127311667 |
| 0.3838265021769037 | 0.3959460039854734 | 0.6817587592175132 |
| 0.4595164870593867 | 0.3454484410326114 | 0.5538985614312179 |
| 0.5002094282532608 | 0.6325999870820732 | 0.7312711069170713 |
| 0.5280936696178216 | 0.6052863786669744 | 0.3819565991142916 |
| 0.4880898688249400 | 0.5307636810010268 | 0.5339082312843532 |
| 0.5679107396852998 | 0.5487490565622539 | 0.4039329687203011 |
| 0.6459275866805927 | 0.8109268801911388 | 0.1811271751324522 |

|                    |                    |                    |
|--------------------|--------------------|--------------------|
| 0.6408192010794064 | 0.6024545185167499 | 0.9032986162680589 |
| 0.6202014280656188 | 0.5394020459922360 | 0.7200102134662340 |
| 0.5479757285531487 | 0.5346590460690649 | 0.8613651990021587 |
| 0.6439663214780523 | 0.6575751006145404 | 0.5917791466525181 |
| 0.5917604700671091 | 0.7745461144269044 | 0.1678963004638518 |
| 0.5577067146287114 | 0.6614812856379630 | 0.7293217421006098 |

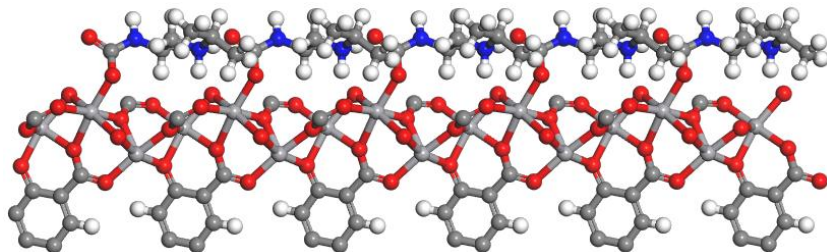

more stable-CO<sub>2</sub>-i-2-V<sub>2</sub>(dobpdc)

1.0000000000000000

|                      |                     |                    |
|----------------------|---------------------|--------------------|
| 20.7357095483298721  | -0.0739570826330833 | 0.0505116198886005 |
| -10.6091505948734248 | 18.6134469505431248 | 0.0036456241305721 |
| -0.0507346294707489  | -0.0348515002334570 | 7.0120017794912819 |

|   |    |    |    |   |
|---|----|----|----|---|
| V | O  | C  | H  | N |
| 6 | 20 | 48 | 32 | 2 |

Direct

|                    |                    |                    |
|--------------------|--------------------|--------------------|
| 0.3569299995841644 | 0.7432181319113038 | 0.8108710391711043 |
| 0.2802835795868659 | 0.6436938099116258 | 0.1494012666178344 |
| 0.3940614730324032 | 0.6743164394945165 | 0.4706226868703796 |
| 0.7231204389586140 | 0.3629221173302095 | 0.2084211777320494 |
| 0.6191087241271794 | 0.2857232962768781 | 0.8735636535800687 |
| 0.6433006857790161 | 0.3861967921905737 | 0.5402169208715614 |
| 0.4454061051095439 | 0.7748944193129422 | 0.6140176540749094 |
| 0.3786270604066673 | 0.7339182076857810 | 0.2529711765032360 |
| 0.4204413799317953 | 0.8176973724006794 | 0.0257895472210615 |
| 0.2534318798205959 | 0.7028285330242121 | 0.9476587374535960 |
| 0.2943362960367581 | 0.6759080284215007 | 0.5852387649153213 |
| 0.2048411842703975 | 0.6303998322068238 | 0.3637356658615656 |
| 0.3216943306818081 | 0.5832445827933412 | 0.2839644642282115 |
| 0.3457858569633363 | 0.6453017772593862 | 0.9205399770978121 |
| 0.4021313109458295 | 0.6115717001776204 | 0.7077045122531546 |
| 0.4908922523030261 | 0.6899384560892650 | 0.3211900560671159 |
| 0.5975213772734206 | 0.7657487554791175 | 0.4827483446441564 |
| 0.7464079300318325 | 0.4488669436863687 | 0.4064532737935906 |
| 0.7065161775536847 | 0.3877595379333075 | 0.7739065958505225 |
| 0.7967051709770313 | 0.4256873179611214 | 0.9919326420821394 |
| 0.6837843385376164 | 0.2628707753534754 | 0.0720784763205455 |
| 0.6608402370368606 | 0.3015147151988026 | 0.4392345959395509 |
| 0.6099443270227597 | 0.2143863811106545 | 0.6554725855957400 |
| 0.5546040208306008 | 0.3240843328726800 | 0.7370345456812580 |
| 0.6177618764378136 | 0.3462167379985688 | 0.1060732279135545 |

|                    |                    |                    |
|--------------------|--------------------|--------------------|
| 0.5791771211641215 | 0.3965427641529800 | 0.3217223632415760 |
| 0.4837000263315728 | 0.8393954981000341 | 0.5309742289055612 |
| 0.4765199560349747 | 0.8531298067573498 | 0.3339816540613331 |
| 0.5180758003467094 | 0.9239330597110529 | 0.2651181470832202 |
| 0.5661519513139641 | 0.9818874686867503 | 0.3797224926635387 |
| 0.5742216757055986 | 0.9672378150595048 | 0.5718954636162614 |
| 0.5345369929370728 | 0.8982875458571935 | 0.6447348050817790 |
| 0.4230986164544880 | 0.7991762606995878 | 0.1968553157396568 |
| 0.1861046658756669 | 0.6741645929566095 | 0.8651532970302602 |
| 0.1708020959301162 | 0.6511780504392362 | 0.6702663087438865 |
| 0.0972182735755423 | 0.6202482557404526 | 0.6021599064198840 |
| 0.0380841186683715 | 0.6106865467950972 | 0.7158522222458965 |
| 0.0543069959487621 | 0.6349917101055207 | 0.9064343377994870 |
| 0.1260262884103273 | 0.6659961260555889 | 0.9784720749908015 |
| 0.2260740061751074 | 0.6527094316547487 | 0.5333554274936659 |
| 0.3424393662725946 | 0.5407891352740815 | 0.1979347022264481 |
| 0.3647405153140035 | 0.5468819579527895 | 0.0018943234922788 |
| 0.3877900607024932 | 0.4997395844154519 | 0.9308721270638102 |
| 0.3909825408397819 | 0.4476048899923609 | 0.0423072628975999 |
| 0.3667970108887149 | 0.4406890725187931 | 0.2329483282071168 |
| 0.3427907949657409 | 0.4853071287778039 | 0.3073626266174296 |
| 0.3709216560774969 | 0.6034320224764631 | 0.8700051805995999 |
| 0.5583930198696754 | 0.7420595306588400 | 0.3304927647077944 |
| 0.5627056392547151 | 0.7461460572623406 | 0.9735719697990931 |
| 0.5861400389027317 | 0.6914183922873430 | 0.9142848074861948 |
| 0.8134448906207097 | 0.4878568127321229 | 0.4905607753519874 |
| 0.8293999216523510 | 0.4815321159808605 | 0.6865108136407500 |
| 0.9028028195008174 | 0.5238595205532750 | 0.7546606647504390 |
| 0.9611796403973003 | 0.5722058843443664 | 0.6406214813047501 |
| 0.9441786523861893 | 0.5791594064335495 | 0.4494146876391371 |
| 0.8727044322869513 | 0.5385136687896138 | 0.3771386891445723 |
| 0.7755597775859804 | 0.4295728852686955 | 0.8241480138919540 |
| 0.6587847249980926 | 0.1983229962811915 | 0.1555103150667961 |
| 0.6365495924664403 | 0.1829602141481628 | 0.3510654278186034 |
| 0.6086699101999002 | 0.1122783279615401 | 0.4187441010792641 |
| 0.6019567852242829 | 0.0560723777389216 | 0.3048011282223199 |
| 0.6260049813409927 | 0.0725440202097695 | 0.1141108940137313 |
| 0.6536039036382744 | 0.1413558051309913 | 0.0421480194373956 |
| 0.6355037021718417 | 0.2347883248588735 | 0.4886319483651526 |
| 0.5138158249096730 | 0.3492082970121755 | 0.8198142342649464 |
| 0.5203505404639263 | 0.3707412804588964 | 0.0159882446862618 |
| 0.4763742453838924 | 0.3990929594997000 | 0.0830188861559091 |
| 0.4265212652077103 | 0.4077042434607598 | 0.9678067432491760 |
| 0.4188335738183032 | 0.3841840566241674 | 0.7767588523120575 |
| 0.4608978741476740 | 0.3556513712885836 | 0.7055690594742062 |
| 0.5746797294262139 | 0.3712693686592642 | 0.1547343853929183 |

|                    |                    |                    |
|--------------------|--------------------|--------------------|
| 0.5882627955668785 | 0.6147078794817020 | 0.6393305391492570 |
| 0.5381878135253624 | 0.5692805448154697 | 0.4751191706430513 |
| 0.5983675394893153 | 0.5680239699612153 | 0.7873614473317472 |
| 0.5084731323958777 | 0.9327893413640653 | 0.1171259110785163 |
| 0.6128767302684220 | 0.0111253280454446 | 0.6647135670198062 |
| 0.5407191584373932 | 0.8872991600396039 | 0.7936821205303077 |
| 0.0871422797218458 | 0.6007172363869859 | 0.4554182026307654 |
| 0.0095986312385375 | 0.6298706672231971 | 0.9985832506107766 |
| 0.1383950316688976 | 0.6847885077198151 | 0.1259458589699351 |
| 0.4059155762653650 | 0.5067690009292243 | 0.7828180118944793 |
| 0.3668588746238848 | 0.3990639167204968 | 0.3227730244097317 |
| 0.3239169031582149 | 0.4798071733728366 | 0.4546786510104693 |
| 0.5702492565248112 | 0.7039096032800197 | 0.6226136919292813 |
| 0.5822897363199422 | 0.7899281887252330 | 0.8680168743362185 |
| 0.5019063421322806 | 0.7205924853202085 | 0.9801781321389911 |
| 0.6471788090079510 | 0.7181381776431106 | 0.9081698860638244 |
| 0.5663071091794926 | 0.6481850179502662 | 0.0204175983424248 |
| 0.9134763622373012 | 0.5152195219764484 | 0.9018811333600633 |
| 0.9882236942372004 | 0.6176536683691535 | 0.3566746850428472 |
| 0.8601393926511959 | 0.5440049859624999 | 0.2288103896521548 |
| 0.5891156094906432 | 0.1019162803930291 | 0.5655315799927545 |
| 0.6231465720858977 | 0.0302381254061099 | 0.0214173454251588 |
| 0.6718991940424890 | 0.1535562242657497 | 0.8943418320798884 |
| 0.4854019357778270 | 0.4180590112081944 | 0.2302101166608534 |
| 0.3789041474262579 | 0.3884716090804089 | 0.6833641508872107 |
| 0.4549088901598859 | 0.3377542352899917 | 0.5574954392904986 |
| 0.4988881833928943 | 0.6298418245597847 | 0.7249173095827116 |
| 0.5256541243596747 | 0.6011761931353179 | 0.3751301445980312 |
| 0.4849607520414818 | 0.5260373788747484 | 0.5295970887817488 |
| 0.5648775315770359 | 0.5436595311601500 | 0.3976253129969218 |
| 0.6470455809092189 | 0.8125338711407762 | 0.1741686726554233 |
| 0.6395931387698867 | 0.5996163101882663 | 0.8976059928129660 |
| 0.6179511530913770 | 0.5352459625514754 | 0.7141512801056422 |
| 0.5456130483496143 | 0.5306497027683884 | 0.8567748317877019 |
| 0.6430459891528013 | 0.6548673125422468 | 0.5834881247045862 |
| 0.5925540695882219 | 0.7747268093725669 | 0.1612135514643075 |
| 0.5568810121071193 | 0.6592400688716120 | 0.7223939062124412 |

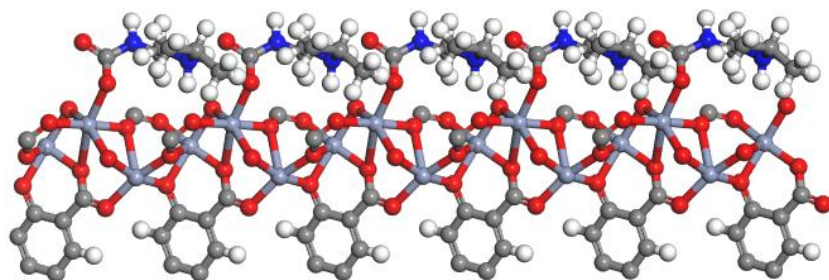

more stable-CO<sub>2</sub>-i-2-Cr<sub>2</sub>(dobpdc)  
1.00000000000000

|                      |                     |                    |
|----------------------|---------------------|--------------------|
| 21.0359679856313093  | 0.1497254435211921  | 0.0426539007034388 |
| -10.5413262935181695 | 18.9138912107031345 | 0.0197048472687670 |
| -0.0648962714518486  | -0.0298768771306373 | 6.5169519146033457 |

|    |    |    |    |   |
|----|----|----|----|---|
| Cr | O  | C  | H  | N |
| 6  | 20 | 48 | 32 | 2 |

Direct

|                    |                    |                    |
|--------------------|--------------------|--------------------|
| 0.3417030302050454 | 0.7498942861987704 | 0.7866229038710889 |
| 0.2733928183268767 | 0.6337135062809953 | 0.1269465016057206 |
| 0.4039895190633930 | 0.6810674599797867 | 0.4507790743112531 |
| 0.7275601391117420 | 0.3491567753315835 | 0.2389263092986940 |
| 0.6057142667383334 | 0.2777972756822701 | 0.9039803688908422 |
| 0.6513920589616915 | 0.3954693808628157 | 0.5702620659631292 |
| 0.4338931205616294 | 0.7729350079039877 | 0.6199668842463839 |
| 0.3896956355537085 | 0.7336083707324840 | 0.2099337651366633 |
| 0.3963948231343554 | 0.8208537397838868 | 0.0156781811087792 |
| 0.2465060872335576 | 0.6980988449444693 | 0.9495414604204472 |
| 0.2851605904423293 | 0.6959513129116728 | 0.5366167008732872 |
| 0.1973900449991045 | 0.6132296325004426 | 0.3477413950306257 |
| 0.3255366249750685 | 0.5892223748007243 | 0.2867494540847753 |
| 0.3293401095569208 | 0.6317245713219863 | 0.8733946068478403 |
| 0.4143953573095263 | 0.6231282330656871 | 0.6942566769650480 |
| 0.5075206793443486 | 0.6979399363127755 | 0.3019344177274868 |
| 0.6048599721711392 | 0.7781439088943757 | 0.4847746966305660 |
| 0.7464748183843737 | 0.4377063605908295 | 0.4107406321901081 |
| 0.7085961225216513 | 0.3975353553364674 | 0.8234864592412570 |
| 0.7998995315777150 | 0.4043588489342356 | 0.0133072527858190 |
| 0.6765188408058854 | 0.2565501887578166 | 0.0766542018639943 |
| 0.6726187121622660 | 0.2945717276969017 | 0.4888664415866480 |
| 0.5904441400545155 | 0.2074288305093915 | 0.6761538084619337 |
| 0.5605992609374826 | 0.3290225648102043 | 0.7410148049099177 |
| 0.6027874935387656 | 0.3313675055849286 | 0.1555917518443930 |
| 0.5938815511285116 | 0.4124894999918569 | 0.3427611418946627 |
| 0.4730109597110886 | 0.8373417335222502 | 0.5355716786194944 |
| 0.4632507878284788 | 0.8531644809529817 | 0.3288771929010616 |
| 0.5019724216909225 | 0.9229390042129719 | 0.2589220649186825 |
| 0.5522308080182874 | 0.9771567902812102 | 0.3827245893318502 |
| 0.5642259578752705 | 0.9599810973576518 | 0.5825825603159730 |
| 0.5258849809160212 | 0.8919679692087708 | 0.6575447894007461 |
| 0.4135689842635225 | 0.7997975014511782 | 0.1797118353935234 |
| 0.1788701431821446 | 0.6682454813153286 | 0.8679606579089949 |
| 0.1623970233998644 | 0.6418829647629648 | 0.6632812570846607 |
| 0.0897799966161223 | 0.6062349088124370 | 0.5971118666589069 |
| 0.0329495602667069 | 0.5983051531978344 | 0.7224683303204857 |
| 0.0503016634747663 | 0.6277694339005928 | 0.9206516570478203 |
| 0.1213090447488552 | 0.6620326996723310 | 0.9920532354957903 |
| 0.2181100352272262 | 0.6505368380973721 | 0.5111991137095138 |

|                    |                    |                    |
|--------------------|--------------------|--------------------|
| 0.3463213919786123 | 0.5456423852369422 | 0.2008317596437286 |
| 0.3719794193039918 | 0.5531421596660785 | 0.9952541189948114 |
| 0.3987012093329821 | 0.5089787447890883 | 0.9240193399936646 |
| 0.3994883530579917 | 0.4562868196070546 | 0.0454754192662119 |
| 0.3704931350714137 | 0.4469455857922837 | 0.2440067685357237 |
| 0.3441401184521676 | 0.4899641478459159 | 0.3197636176244705 |
| 0.3720836596085316 | 0.6057523802605579 | 0.8498321949875328 |
| 0.5688992762192652 | 0.7540115378331826 | 0.3172180088716083 |
| 0.5754928519997956 | 0.7593236504720836 | 0.9396847345873700 |
| 0.5975751934234688 | 0.7022019692318906 | 0.9045721707028127 |
| 0.8129810016090341 | 0.4777101628225391 | 0.4960630981015406 |
| 0.8308446698407154 | 0.4690260829019424 | 0.7017042361055602 |
| 0.9028998204695078 | 0.5086605276534455 | 0.7711976752300197 |
| 0.9571174467374368 | 0.5588609637150067 | 0.6481445720960050 |
| 0.9376155117022963 | 0.5693616338780350 | 0.4491783375007358 |
| 0.8674754635845956 | 0.5299410489335117 | 0.3743385224862713 |
| 0.7772160265979353 | 0.4207129595694684 | 0.8509558793744225 |
| 0.6509385474220838 | 0.1914946888049681 | 0.1603245597346675 |
| 0.6246286362575859 | 0.1751531524991606 | 0.3648799208223245 |
| 0.5928436288481067 | 0.1049349146120069 | 0.4323938087748637 |
| 0.5889646554122547 | 0.0507562020209259 | 0.3085746780892323 |
| 0.6188290280588700 | 0.0685054385889548 | 0.1108871453515483 |
| 0.6491932518837502 | 0.1370225764399287 | 0.0380675338007617 |
| 0.6289561736176630 | 0.2282823664997614 | 0.5147111459241569 |
| 0.5191709996763579 | 0.3546844308345536 | 0.8234008074740614 |
| 0.5273971294314836 | 0.3793430565417809 | 0.0296366904750212 |
| 0.4862506678930942 | 0.4105438157251274 | 0.0974163079884369 |
| 0.4355633788663447 | 0.4165047433861259 | 0.9717419722578520 |
| 0.4251803238967184 | 0.3885418567568312 | 0.7719678443194498 |
| 0.4656068714461981 | 0.3581399341314311 | 0.6993585594124547 |
| 0.5776687461363962 | 0.3745098829299326 | 0.1809158067605095 |
| 0.5969162880602074 | 0.6189893055206277 | 0.6263167215068424 |
| 0.5473702957694205 | 0.5722325387895084 | 0.4547751104947484 |
| 0.6078428101821440 | 0.5754182834850643 | 0.7935132143796760 |
| 0.4901174799827603 | 0.9337944485691401 | 0.1039753453884463 |
| 0.6049490950550517 | 0.0012527673780837 | 0.6798810482975294 |
| 0.5354330453916725 | 0.8790672900480386 | 0.8125932124365164 |
| 0.0790262386833465 | 0.5835676804091294 | 0.4433187892956783 |
| 0.0068743930898034 | 0.6239496389134170 | 0.0193900897673974 |
| 0.1342927309207100 | 0.6846343624586394 | 0.1459067557502211 |
| 0.4200054230368763 | 0.5174945223662522 | 0.7685596658182555 |
| 0.3687302527677345 | 0.4046803253936804 | 0.3395429310650852 |
| 0.3213311188234309 | 0.4821920149482389 | 0.4733733935301491 |
| 0.5783235118653529 | 0.7078404193660615 | 0.6007327226362247 |
| 0.5978029510335738 | 0.7992703619060915 | 0.8178985764819758 |
| 0.5161598320420230 | 0.7359280718877047 | 0.9322373995692724 |



|                    |                    |                    |
|--------------------|--------------------|--------------------|
| 0.6569126661825089 | 0.7260673953958442 | 0.8955042000056449 |
| 0.5781075426903716 | 0.6644134305721647 | 0.0315323953872723 |
| 0.9156195460591161 | 0.4980350050710662 | 0.9254080367312090 |
| 0.9788045088850159 | 0.6096819813870972 | 0.3523010626711398 |
| 0.8529857997261066 | 0.5381500757634952 | 0.2195122714195619 |
| 0.5696667800613469 | 0.0936372023843593 | 0.5856870175266107 |
| 0.6181091918707844 | 0.0273035514156002 | 0.0130856757091354 |
| 0.6719709592718544 | 0.1501880046348832 | 0.8843845782301455 |
| 0.4965991984619262 | 0.4320511066800958 | 0.2524490268745009 |
| 0.3842709893522874 | 0.3907447598689376 | 0.6726898069633035 |
| 0.4571659349232637 | 0.3365074545136381 | 0.5444579484697032 |
| 0.5102901347645212 | 0.6369935935121678 | 0.7161960782677341 |
| 0.5325247853973026 | 0.6020092593548005 | 0.3462055059200637 |
| 0.4970069183945248 | 0.5298964115245662 | 0.5186320934857774 |
| 0.5743741123503969 | 0.5471813096585226 | 0.3722775205843497 |
| 0.6520866887431643 | 0.8300721827930416 | 0.1566804793382795 |
| 0.6483361174810827 | 0.6079272014612845 | 0.9089971495258544 |
| 0.6267700452283693 | 0.5413931987356201 | 0.7215383806315244 |
| 0.5567609098412273 | 0.5407924792980262 | 0.8716880073571101 |
| 0.6499594635636136 | 0.6566278764662583 | 0.5624367932944858 |
| 0.6002741503829780 | 0.7910067398491089 | 0.1397599764271426 |
| 0.5666039158082590 | 0.6646268337720328 | 0.7074109145747544 |

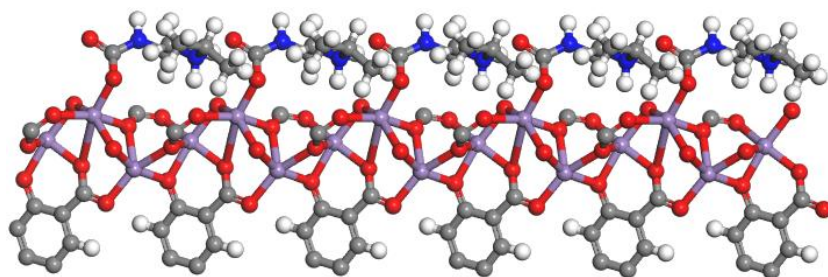

more stable-CO<sub>2</sub>-i-2-Mn<sub>2</sub>(dobpdc)

|                      |                     |                     |    |   |
|----------------------|---------------------|---------------------|----|---|
| 1.0000000000000000   |                     |                     |    |   |
| 21.0425009539276218  | 0.0340545390940035  | -0.0113922356628933 |    |   |
| -10.6667831087283247 | 18.9714540127547622 | 0.0209961223202064  |    |   |
| -0.0825603269077551  | -0.0459654674728385 | 6.7407755145021220  |    |   |
| Mn                   | O                   | C                   | H  | N |
| 6                    | 20                  | 48                  | 32 | 2 |

Direct

|                    |                    |                    |
|--------------------|--------------------|--------------------|
| 0.3493337800813734 | 0.7407247613582939 | 0.7885265364406209 |
| 0.2792667933843944 | 0.6451742217843943 | 0.1595343399800413 |
| 0.4155847600122229 | 0.6798845323205498 | 0.4426340397559017 |
| 0.7225866320289356 | 0.3564784193168791 | 0.2253884309380823 |
| 0.6134335538944882 | 0.2819139880634651 | 0.8881917264808195 |
| 0.6431119082248813 | 0.3856474321423278 | 0.5535653106813569 |
| 0.4403032128875211 | 0.7726245662961801 | 0.6005695219166967 |
| 0.3860552322382773 | 0.7343059478090268 | 0.2177547984673680 |
| 0.4074973323042386 | 0.8205241341895189 | 0.0047294490387131 |

|                    |                    |                    |
|--------------------|--------------------|--------------------|
| 0.2485750533336599 | 0.6964230160423313 | 0.9406787645213583 |
| 0.2847133205711927 | 0.6889133708805346 | 0.5377026465352941 |
| 0.1916567270045562 | 0.6123745019265172 | 0.3524912298819487 |
| 0.3314982448490724 | 0.5914934920722743 | 0.2836321333634331 |
| 0.3379801157793381 | 0.6381068945412522 | 0.8896430106407252 |
| 0.4162243771834753 | 0.6220536590566184 | 0.7044463194853634 |
| 0.5098683405322078 | 0.6978620999568435 | 0.2982489855835055 |
| 0.6090612399813793 | 0.7756900355689638 | 0.4780951081332248 |
| 0.7449359841305281 | 0.4406008475126697 | 0.4210046973486499 |
| 0.7072044808372979 | 0.3888560160870966 | 0.8083361714320176 |
| 0.8004840348766322 | 0.4126871909163228 | 0.0130937223962988 |
| 0.6758013931209206 | 0.2575467280286929 | 0.0866552757867964 |
| 0.6600200522220518 | 0.2947458721004566 | 0.4728259529398642 |
| 0.5920069918792521 | 0.2054690122067839 | 0.6725403230891303 |
| 0.5562642929610107 | 0.3274572084007019 | 0.7481989245939928 |
| 0.6104305376919399 | 0.3420331887990216 | 0.1392739486672099 |
| 0.5855469720632485 | 0.4089896039862779 | 0.3385884001107726 |
| 0.4766380679016393 | 0.8373542297755847 | 0.5217814154504623 |
| 0.4670587592267310 | 0.8534564614439475 | 0.3214133257408989 |
| 0.5051476424716626 | 0.9235925414442292 | 0.2566385708975290 |
| 0.5534463670434846 | 0.9785603857688514 | 0.3792799594048617 |
| 0.5643601205900239 | 0.9617324317982963 | 0.5742082993915574 |
| 0.5273587814880116 | 0.8932863125214183 | 0.6433816018965928 |
| 0.4175273753000326 | 0.8005154552432288 | 0.1741550432331280 |
| 0.1807639122831191 | 0.6674612028708538 | 0.8644562251928321 |
| 0.1623297011293872 | 0.6411294676917905 | 0.6659370783189331 |
| 0.0890038868117315 | 0.6074491950704939 | 0.6036731006405915 |
| 0.0330690302864269 | 0.6004054722920884 | 0.7262244852475774 |
| 0.0520971786221551 | 0.6290614049695620 | 0.9190718119539270 |
| 0.1237570651156332 | 0.6617794019906640 | 0.9863162588174248 |
| 0.2157169204954243 | 0.6473573039737417 | 0.5145710998604542 |
| 0.3484903359694869 | 0.5464701012951707 | 0.1970225036513966 |
| 0.3721522068795267 | 0.5528973776207877 | 0.9962387154076922 |
| 0.3959119203377739 | 0.5070767731111445 | 0.9249331603129249 |
| 0.3965596860717682 | 0.4543979750503837 | 0.0412229296605133 |
| 0.3693943201740097 | 0.4460686363904216 | 0.2350958287024412 |
| 0.3454185268806498 | 0.4902426959539596 | 0.3103547318527120 |
| 0.3756233965819433 | 0.6074761109241322 | 0.8577763926311164 |
| 0.5737025829791733 | 0.7528351396127206 | 0.3153118046236685 |
| 0.5783830404318451 | 0.7576444231853756 | 0.9477337283532776 |
| 0.5982827759582037 | 0.6999721020575862 | 0.9046882942846111 |
| 0.8114697160375641 | 0.4801153279337242 | 0.5042568320185907 |
| 0.8293548655420793 | 0.4718543634650629 | 0.7039147223141029 |
| 0.9017840730794546 | 0.5125065250630740 | 0.7725068492364002 |
| 0.9567435334750982 | 0.5619723238820740 | 0.6540363664821527 |
| 0.9374492433706934 | 0.5715637361436166 | 0.4600089641155662 |

|                    |                    |                    |
|--------------------|--------------------|--------------------|
| 0.8669126586881291 | 0.5319960067361933 | 0.3870560310857201 |
| 0.7767692641672141 | 0.4218108664039377 | 0.8470724961941372 |
| 0.6497418659162761 | 0.1928782027319826 | 0.1657966436527616 |
| 0.6234251702046194 | 0.1759981050221242 | 0.3635691350824786 |
| 0.5930663018813362 | 0.1058675115229590 | 0.4284576334022461 |
| 0.5891083105667789 | 0.0520527094548768 | 0.3083108578874771 |
| 0.6178349410674784 | 0.0701035687754157 | 0.1160102436280965 |
| 0.6474571766343402 | 0.1384608707498600 | 0.0465780341335744 |
| 0.6246856881476006 | 0.2275620943083823 | 0.5084221137788560 |
| 0.5159893117255123 | 0.3535839509555672 | 0.8264230683030149 |
| 0.5242471227547369 | 0.3783006517464713 | 0.0262998702266515 |
| 0.4822436760643640 | 0.4083177145026013 | 0.0910645082356254 |
| 0.4319503362251709 | 0.4146426265419549 | 0.9687684150214011 |
| 0.4223892430924749 | 0.3878214321135474 | 0.7739479760878183 |
| 0.4628790509726528 | 0.3578407335381542 | 0.7049306123394246 |
| 0.5762183721181344 | 0.3766828832371800 | 0.1736751280213227 |
| 0.5947571666507088 | 0.6169723549062525 | 0.6323595740586612 |
| 0.5445171820577670 | 0.5716327637979219 | 0.4640254350582040 |
| 0.6030672452136727 | 0.5719378200179719 | 0.7932881899195081 |
| 0.4938688199825378 | 0.9340155267085279 | 0.1056707805358030 |
| 0.6032457180167228 | 0.0035719508452488 | 0.6720680108457699 |
| 0.5358872247436466 | 0.8807522049652832 | 0.7947142802756701 |
| 0.0769014379483011 | 0.5853521235143830 | 0.4540541195958312 |
| 0.0096293432731471 | 0.6259680466646032 | 0.0168073920279994 |
| 0.1379688876402483 | 0.6836763239588350 | 0.1360232037163271 |
| 0.4157672761902660 | 0.5147128509429493 | 0.7733215394160382 |
| 0.3674779909696824 | 0.4039255106453794 | 0.3274123488368588 |
| 0.3243979989066901 | 0.4836666554439901 | 0.4606238930701210 |
| 0.5792991525504334 | 0.7063809513871675 | 0.6074731241679814 |
| 0.6010325348281924 | 0.7987956949709343 | 0.8334495516148053 |
| 0.5189291456157648 | 0.7354123958442358 | 0.9439948365737436 |
| 0.6577620898157477 | 0.7230853944031779 | 0.8965593069027236 |
| 0.5779494894374935 | 0.6608585068434252 | 0.0237260352675648 |
| 0.9143420308926267 | 0.5025990672686120 | 0.9225792429313842 |
| 0.9791573969970884 | 0.6111439715987430 | 0.3655043742102109 |
| 0.8526692173969082 | 0.5393918415803611 | 0.2360940334013009 |
| 0.5706462282511779 | 0.0942957625248297 | 0.5772873791061386 |
| 0.6169941445683520 | 0.0292803753991606 | 0.0201891207434741 |
| 0.6694025317245078 | 0.1518417290242127 | 0.8973443059670458 |
| 0.4921059875608549 | 0.4291918680039828 | 0.2418847680612330 |
| 0.3820929300592866 | 0.3905047061107325 | 0.6759553993804843 |
| 0.4551491289277223 | 0.3371017347616529 | 0.5540203854618966 |
| 0.5095595159497179 | 0.6367888304493050 | 0.7205158013953010 |
| 0.5332959175888234 | 0.6028473120136795 | 0.3557063155513021 |
| 0.4920538417815692 | 0.5313031531781292 | 0.5224028324658860 |
| 0.5693282779054698 | 0.5440393966667685 | 0.3882991685372943 |

|                    |                    |                    |
|--------------------|--------------------|--------------------|
| 0.6578893219172457 | 0.8271934260999174 | 0.1582601856725958 |
| 0.6442395089320883 | 0.6032612353078335 | 0.9063315343318976 |
| 0.6201380753053627 | 0.5369028360630637 | 0.7231916709795030 |
| 0.5511349940266967 | 0.5382454075125054 | 0.8669361557551980 |
| 0.6487495955066080 | 0.6539041761155602 | 0.5731744613751530 |
| 0.6058330048036211 | 0.7876442137980604 | 0.1428908589475029 |
| 0.5664208892275866 | 0.6639467944134054 | 0.7116276668578791 |

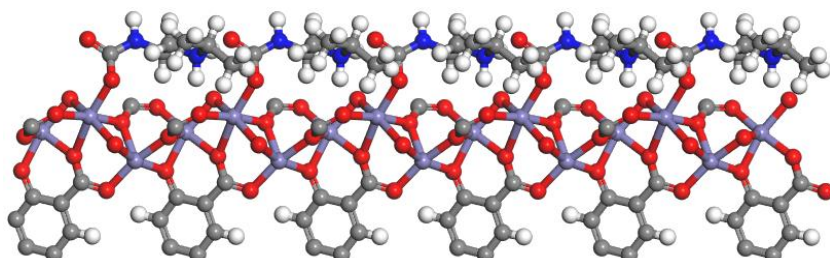

more stable-CO<sub>2</sub>-i-2-Fe<sub>2</sub>(dobpdc)

1.0000000000000000

|                      |                     |                     |
|----------------------|---------------------|---------------------|
| 20.7399063805317319  | -0.0280894518548001 | 0.0876757638116204  |
| -10.5597309102853618 | 18.9298739079887177 | -0.0197461225125640 |
| -0.0491966331442219  | -0.0382140441844000 | 6.8117804233222143  |

| Fe | O  | C  | H  | N |
|----|----|----|----|---|
| 6  | 20 | 48 | 32 | 2 |

Direct

|                    |                    |                    |
|--------------------|--------------------|--------------------|
| 0.3531602255192780 | 0.7417996178635635 | 0.8083276592552087 |
| 0.2824883289774694 | 0.6455879940650562 | 0.1511839135534893 |
| 0.3985359642880849 | 0.6782722898166592 | 0.4665245427133856 |
| 0.7198647359643493 | 0.3551305430786994 | 0.2117008685961247 |
| 0.6175459040670646 | 0.2838187038635991 | 0.8773235240251669 |
| 0.6439165296771669 | 0.3813078336839878 | 0.5441243646912917 |
| 0.4393097628642722 | 0.7751108643606749 | 0.6125238710023928 |
| 0.3780052893618956 | 0.7358846699130449 | 0.2497829275073277 |
| 0.4145137063971570 | 0.8171482351979635 | 0.0131473916010390 |
| 0.2514051464990624 | 0.6981820078193784 | 0.9459852615065035 |
| 0.2923422853308938 | 0.6775695294840923 | 0.5793880649025089 |
| 0.2038644047319494 | 0.6276747394955799 | 0.3513194091664898 |
| 0.3283727666378353 | 0.5904665333287121 | 0.2837821923660830 |
| 0.3463165290816871 | 0.6453162736844550 | 0.9161939683703323 |
| 0.4071968824661367 | 0.6162961954862173 | 0.6979272327900541 |
| 0.4948484776176446 | 0.6967633755363252 | 0.3118313015222025 |
| 0.5986199140799210 | 0.7724373825378564 | 0.4831043696680213 |
| 0.7454551031652575 | 0.4375473153627053 | 0.4120312004123651 |
| 0.7063417342103977 | 0.3849309353671796 | 0.7835346328431460 |
| 0.7953901243604390 | 0.4165902667949347 | 0.0082736380747279 |
| 0.6771301694524383 | 0.2577374585131847 | 0.0773896700526968 |
| 0.6604503848842103 | 0.2956785061395831 | 0.4485051776802781 |
| 0.6051056632231421 | 0.2109588929975283 | 0.6717579915711391 |
| 0.5576606310142794 | 0.3258404781385669 | 0.7426918328756124 |

|                    |                    |                     |
|--------------------|--------------------|---------------------|
| 0.6132763275288773 | 0.3404421165445055 | 0.1160744014628492  |
| 0.5810250645269498 | 0.3958963771885146 | 0.3385226331332504  |
| 0.4778203588514253 | 0.8391711277578722 | 0.5307138808520764  |
| 0.4699659023122489 | 0.8538295049943613 | 0.3300944691467614  |
| 0.5099007232315543 | 0.9235455350023652 | 0.2608740391059191  |
| 0.5583065894910507 | 0.9795298700888795 | 0.3798387741158151  |
| 0.5680922924272357 | 0.9638339274452535 | 0.5750207633736413  |
| 0.5293418929729516 | 0.8958704013584712 | 0.6483079145537430  |
| 0.4184780685616247 | 0.7998296247145763 | 0.1898509813514132  |
| 0.1835310922670652 | 0.6690418238614305 | 0.8662576892465721  |
| 0.1674946367385045 | 0.6447420576933615 | 0.6679081331765260  |
| 0.0939420497091898 | 0.6115657872123439 | 0.6008109544082834  |
| 0.0354269919747981 | 0.6021677980250204 | 0.7200355700922995  |
| 0.0523566872062269 | 0.6289375241043845 | 0.9134829435229055  |
| 0.1241480184105987 | 0.6616556241886806 | 0.9846301560940225  |
| 0.2242139082548451 | 0.6503027858442727 | 0.5266669224609417  |
| 0.3480855159363880 | 0.5467819587482116 | 0.1995497052950495  |
| 0.3711348406332513 | 0.5521534138028633 | -0.0007351361364247 |
| 0.3949597699286693 | 0.5058652414608169 | 0.9277368902773165  |
| 0.3969683460834990 | 0.4540595233041316 | 0.0438442297378201  |
| 0.3709149130475351 | 0.4470611827758630 | 0.2381392890244499  |
| 0.3468246748871492 | 0.4915680008501735 | 0.3134638880636250  |
| 0.3748495922958040 | 0.6069603197052641 | 0.8643724559732381  |
| 0.5607982733442375 | 0.7492436528724188 | 0.3247805481730409  |
| 0.5670162586804767 | 0.7532121999851313 | 0.9593643515097925  |
| 0.5900993600752599 | 0.6976970439402360 | 0.9097917886152213  |
| 0.8122325416400211 | 0.4780574332455360 | 0.4949374801481601  |
| 0.8292527997496708 | 0.4722633044139722 | 0.6953663773938388  |
| 0.9020710487851501 | 0.5140763395168122 | 0.7646711381971590  |
| 0.9586222964140789 | 0.5626220705944740 | 0.6462921652275914  |
| 0.9402120455859853 | 0.5699144619362762 | 0.4511951152288403  |
| 0.8693587791850815 | 0.5291150970190004 | 0.3775424343040323  |
| 0.7749754589965856 | 0.4223587479673452 | 0.8356229839954740  |
| 0.6523851619102254 | 0.1934771544542649 | 0.1585611568362227  |
| 0.6291380206075574 | 0.1774876991736362 | 0.3582112366611093  |
| 0.5998924798381814 | 0.1076259305197084 | 0.4256945394128025  |
| 0.5940425553161910 | 0.0528903353848530 | 0.3063978462010017  |
| 0.6201243837125775 | 0.0700737665063591 | 0.1120983372792376  |
| 0.6484922407278726 | 0.1381240742104055 | 0.0401459660791092  |
| 0.6313003533964533 | 0.2299765944722309 | 0.4994743157618771  |
| 0.5168719806035015 | 0.3518364954204829 | 0.8232348806499359  |
| 0.5233739343186947 | 0.3741113365865038 | 0.0235983072921913  |
| 0.4813706394658013 | 0.4047183783827482 | 0.0906972910025224  |
| 0.4322429285629956 | 0.4136530118792786 | 0.9703464816470793  |
| 0.4237531446861736 | 0.3885825813551145 | 0.7753629369493861  |
| 0.4645049183294849 | 0.3584155807053332 | 0.7039716519213883  |

|                    |                    |                    |
|--------------------|--------------------|--------------------|
| 0.5748786670252990 | 0.3701573313511959 | 0.1661354406588287 |
| 0.5933876391003643 | 0.6203306039442513 | 0.6314618790471798 |
| 0.5445118299177211 | 0.5757339635143126 | 0.4616007465752579 |
| 0.6032017126897128 | 0.5745386764987962 | 0.7856490672189788 |
| 0.4993619051638154 | 0.9329524894316609 | 0.1099569691405133 |
| 0.6075257056736596 | 0.0063300147385777 | 0.6698677933666526 |
| 0.5368685575087813 | 0.8842782193204500 | 0.7997607049007908 |
| 0.0837144762463445 | 0.5909314522682433 | 0.4511597249153325 |
| 0.0079184297717673 | 0.6243031881348466 | 0.0086624105782843 |
| 0.1367532596127602 | 0.6820598917157238 | 0.1345223288203294 |
| 0.4139728258942460 | 0.5127493556442132 | 0.7761401905807300 |
| 0.3696629758840062 | 0.4053461476898960 | 0.3304858968684422 |
| 0.3266202265804369 | 0.4858236525355141 | 0.4637460802886602 |
| 0.5734670286271718 | 0.7080330827727049 | 0.6131251225913719 |
| 0.5879443662057897 | 0.7949762478107627 | 0.8469071537945675 |
| 0.5065685786524788 | 0.7290830790523012 | 0.9605135927515062 |
| 0.6507234462489333 | 0.7228898204187716 | 0.9047609910303345 |
| 0.5697410382519035 | 0.6566991534732034 | 0.0232911142103358 |
| 0.9135470510143961 | 0.5055892564511940 | 0.9155218646577146 |
| 0.9829438143693228 | 0.6089558434783687 | 0.3563652414863263 |
| 0.8560134402255259 | 0.5348628319669411 | 0.2259983321486847 |
| 0.5794217460175167 | 0.0970197659962043 | 0.5759131514045207 |
| 0.6181266910993922 | 0.0286697261198259 | 0.0164306582476392 |
| 0.6681364412323704 | 0.1505952213127358 | 0.8893691589501277 |
| 0.4906842440212684 | 0.4241053142555008 | 0.2415732712885357 |
| 0.3839628033004571 | 0.3928641414013634 | 0.6788873773993531 |
| 0.4577152879828588 | 0.3394003977950718 | 0.5528641675900950 |
| 0.5036271413180263 | 0.6350520065518402 | 0.7176569439745154 |
| 0.5313204672559774 | 0.6070158886579666 | 0.3593068428148548 |
| 0.4919606701763740 | 0.5328903427704789 | 0.5168363954396382 |
| 0.5720591648830444 | 0.5511140058008557 | 0.3814144268979190 |
| 0.6484008251448972 | 0.8205972061584857 | 0.1670833878357172 |
| 0.6435002769556275 | 0.6057849128570579 | 0.8998492906542004 |
| 0.6232974800060600 | 0.5419708088971080 | 0.7125705171571124 |
| 0.5505586831663468 | 0.5382210515636637 | 0.8562385240739953 |
| 0.6479615514628380 | 0.6595539887297363 | 0.5752462212030968 |
| 0.5947262990261268 | 0.7828765778288193 | 0.1522439771658042 |
| 0.5612028572046845 | 0.6641293433480514 | 0.7144170747054182 |

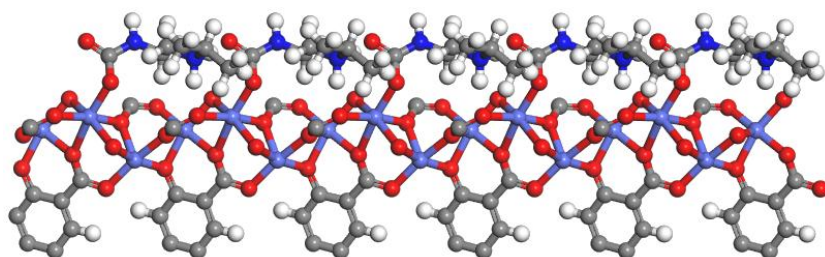

more stable-CO<sub>2</sub>-i-2-CO<sub>2</sub>(dobpdc)

1.00000000000000  
 20.5734026848175944 -0.0551821180202476 0.0973174298642376  
 -10.5008823694867051 18.7162238295306516 -0.0018619736428877  
 -0.0465118175492364 -0.0290803791075902 6.7599281544202610

Co O C H N  
 6 20 48 32 2

Direct

0.3561095952782104 0.7417322449834998 0.8095096162504692  
 0.2825641486657688 0.6464149124291939 0.1503596842794017  
 0.3988022763862032 0.6770496396358122 0.4631611197581111  
 0.7205204377646366 0.3598132191830489 0.2155171907426606  
 0.6201266879953461 0.2850431558841577 0.8810689419762210  
 0.6419438352230449 0.3816472215649285 0.5477579972797993  
 0.4385606062853017 0.7728530824206497 0.6144256807213899  
 0.3766879718497165 0.7343969027195019 0.2516750629907299  
 0.4121381828752786 0.8169358669428596 0.0137589286492794  
 0.2540176697571293 0.6977301383385438 0.9490703785938995  
 0.2945039413688966 0.6733689143938065 0.5857978145090874  
 0.2060123517898298 0.6273109993800079 0.3522555492761333  
 0.3239974065451707 0.5887762243719967 0.2854350798093202  
 0.3511340570233264 0.6497700589377681 0.9227393594024279  
 0.4070837259972359 0.6166277026763938 0.6965620111416623  
 0.4928182746319297 0.6956222285892668 0.3091161591675963  
 0.5976294822999257 0.7721235737379286 0.4820612476705605  
 0.7440877740152052 0.4391509106159834 0.4114841910924823  
 0.7058634531545868 0.3830706823766616 0.7804567994083861  
 0.7949299137469851 0.4162509649518352 0.0094675442452149  
 0.6782015807933827 0.2614825551140458 0.0773584532580674  
 0.6580103031103206 0.2986561019336254 0.4461906989903669  
 0.6035983837160467 0.2133613886458692 0.6737651022904861  
 0.5593831131124193 0.3266643344318761 0.7426881938218755  
 0.6178517041568552 0.3451352294636378 0.1133144520809670  
 0.5838277494620043 0.3989395858846964 0.3401392597932270  
 0.4779705979741165 0.8380668564979408 0.5328234964186565  
 0.4701114281773519 0.8533839736903952 0.3312035854921763  
 0.5110159208684097 0.9239708352940987 0.2618759752581735  
 0.5604051401502831 0.9802191499993775 0.3822143865152253  
 0.5701540297643213 0.9638515201425081 0.5783188087995400  
 0.5304070417669112 0.8948903195688019 0.6515876236735808  
 0.4172219845403613 0.7989628457922583 0.1908743127325797  
 0.1856399891219898 0.6701933711969560 0.8685799636146810  
 0.1694946939312358 0.6458916200411485 0.6690650349235210  
 0.0955807717675044 0.6144418992216901 0.6000150577745477  
 0.0369478467749880 0.6066132109936700 0.7196286656475376  
 0.0542522721073403 0.6336894424842932 0.9142070328385761  
 0.1265530879474844 0.6650550740943634 0.9868375580406751

|                    |                    |                    |
|--------------------|--------------------|--------------------|
| 0.2266224482719179 | 0.6491899912640771 | 0.5293987837796675 |
| 0.3440618860209886 | 0.5448896733568630 | 0.2007908551289400 |
| 0.3689273525679160 | 0.5511042600526604 | 0.0001535507442749 |
| 0.3920639511411403 | 0.5037803288819188 | 0.9284877227410979 |
| 0.3926532011862608 | 0.4506955542996099 | 0.0457217978450339 |
| 0.3653313830583660 | 0.4431140185731334 | 0.2404625573269165 |
| 0.3410156517246885 | 0.4881370975875907 | 0.3151814606073613 |
| 0.3755659580418919 | 0.6082246208772298 | 0.8657729756245885 |
| 0.5597722100222875 | 0.7486327037920592 | 0.3224047769493447 |
| 0.5672238208886528 | 0.7519113874539027 | 0.9540930111148958 |
| 0.5901863808012835 | 0.6954972017945924 | 0.9065615959989703 |
| 0.8116153670193422 | 0.4806490434283554 | 0.4946324582832603 |
| 0.8290617380894238 | 0.4743042604600898 | 0.6957327466637317 |
| 0.9024221246496347 | 0.5171961105597089 | 0.7654808055297431 |
| 0.9592567201468944 | 0.5671391501107695 | 0.6460540784857217 |
| 0.9403752313880359 | 0.5751016315159075 | 0.4505223653052742 |
| 0.8687441672947175 | 0.5334272798107909 | 0.3768080838619746 |
| 0.7743827347632180 | 0.4221603197524719 | 0.8352855744120267 |
| 0.6539975512227261 | 0.1965075191668084 | 0.1593659258426333 |
| 0.6298678185495316 | 0.1799705976658362 | 0.3599348120578394 |
| 0.6012914212018460 | 0.1094942096676325 | 0.4286824364080307 |
| 0.5967319152671452 | 0.0546531302575017 | 0.3088702582383929 |
| 0.6239738810563890 | 0.0725185324764856 | 0.1139017831078165 |
| 0.6520202582564014 | 0.1413363327853907 | 0.0410565789820451 |
| 0.6302749495367181 | 0.2328119939024130 | 0.5000194385819099 |
| 0.5168038985238932 | 0.3512979264932165 | 0.8241551660425255 |
| 0.5233643280823604 | 0.3740622527430018 | 0.0254811674635064 |
| 0.4794683869022782 | 0.4030625474307418 | 0.0938062600969694 |
| 0.4287430886479787 | 0.4103220481093952 | 0.9727935312294158 |
| 0.4201359975515920 | 0.3845394204975240 | 0.7770908168278535 |
| 0.4624810283006821 | 0.3554861278853617 | 0.7049195580212895 |
| 0.5774961773087759 | 0.3727045357777886 | 0.1665323517277587 |
| 0.5932418510148089 | 0.6171793292242268 | 0.6259657521992388 |
| 0.5435584810789402 | 0.5718579867617205 | 0.4557336268047357 |
| 0.6035302722881022 | 0.5709910322005888 | 0.7808846361858451 |
| 0.5004610332594542 | 0.9339876048814499 | 0.1102439050712659 |
| 0.6102053270783883 | 0.0065744242806774 | 0.6740769554798879 |
| 0.5378634670876712 | 0.8827476189523680 | 0.8038325805649593 |
| 0.0848585314221595 | 0.5934286733066519 | 0.4494767282754508 |
| 0.0096968641695747 | 0.6301822926851033 | 0.0092376709190202 |
| 0.1396136782114510 | 0.6856900835073244 | 0.1376785135575661 |
| 0.4121225438562343 | 0.5110215190701085 | 0.7764386246346469 |
| 0.3632231002601173 | 0.4005540744712823 | 0.3335760057572356 |
| 0.3194298359791333 | 0.4818206259599358 | 0.4654718198800664 |
| 0.5730500764503621 | 0.7056360794787495 | 0.6093284383125377 |
| 0.5890286015803043 | 0.7940822156404467 | 0.8401982415736742 |



|                    |                    |                    |
|--------------------|--------------------|--------------------|
| 0.5062397821964237 | 0.7277859765522209 | 0.9538464820894731 |
| 0.6514098734202960 | 0.7208677932316744 | 0.9013660286534216 |
| 0.5693518685098943 | 0.6541859693887614 | 0.0217415296311689 |
| 0.9143640570540836 | 0.5081791156949915 | 0.9167069757970672 |
| 0.9833559296934254 | 0.6151951388974927 | 0.3551868717261017 |
| 0.8549627708765254 | 0.5397046915106235 | 0.2248484654672892 |
| 0.5799203876120806 | 0.0982576699954633 | 0.5794798742122810 |
| 0.6230688358961524 | 0.0310499010836480 | 0.0183553042736558 |
| 0.6726210819920889 | 0.1544447132408697 | 0.8897546881462524 |
| 0.4887924855028665 | 0.4230563582204220 | 0.2452948683837544 |
| 0.3791185234905242 | 0.3875539774558825 | 0.6805967676063108 |
| 0.4555963105939713 | 0.3358493720385023 | 0.5532149055719002 |
| 0.5026077912528871 | 0.6319743486105294 | 0.7142073467578268 |
| 0.5298310125846935 | 0.6032544044521041 | 0.3530274699139284 |
| 0.4906879361273767 | 0.5282198337258739 | 0.5124086990070873 |
| 0.5714466421780903 | 0.5473246656158844 | 0.3742641812025155 |
| 0.6491377575345388 | 0.8197546607397412 | 0.1640324603392501 |
| 0.6443192946681841 | 0.6027275871085027 | 0.8955258513307970 |
| 0.6239491866124923 | 0.5384052913382240 | 0.7065960125531452 |
| 0.5504691138170807 | 0.5339002135012474 | 0.8525667381757909 |
| 0.6482458728563935 | 0.6570455073606981 | 0.5682898987476532 |
| 0.5947073242455994 | 0.7820774257237967 | 0.1484473630476665 |
| 0.5608401681656257 | 0.6612325190362052 | 0.7102843321895269 |

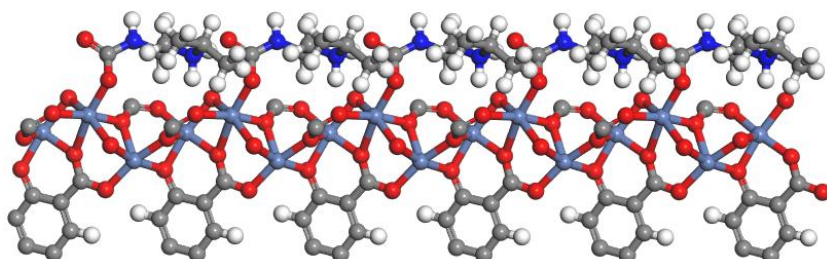

more stable-CO<sub>2</sub>-i-2-Ni<sub>2</sub>(dobpdc)

1.00000000000000

|                      |                     |                     |
|----------------------|---------------------|---------------------|
| 20.3998306225820087  | -0.0500635328070066 | 0.0955498413911611  |
| -10.4028491172640773 | 18.5849962259337538 | -0.0163800032138086 |
| -0.0475260837541294  | -0.0336606233142199 | 6.7111152287647196  |

|    |    |    |    |   |
|----|----|----|----|---|
| Ni | O  | C  | H  | N |
| 6  | 20 | 48 | 32 | 2 |

Direct

|                    |                    |                    |
|--------------------|--------------------|--------------------|
| 0.3533731252980685 | 0.7438643028804653 | 0.8002243088364062 |
| 0.2818728182851125 | 0.6452964949191959 | 0.1450013832957246 |
| 0.4018408908795568 | 0.6801695062384919 | 0.4590174450073621 |
| 0.7209940329338698 | 0.3586150463925801 | 0.2230659241954273 |
| 0.6168106587787665 | 0.2844792001462439 | 0.8890814962600756 |
| 0.6429945154649607 | 0.3845235869532189 | 0.5557908838937937 |
| 0.4437428906596567 | 0.7727710225216583 | 0.6153785549257396 |
| 0.3811326246329090 | 0.7333422033684756 | 0.2395098290686271 |

|                    |                    |                    |
|--------------------|--------------------|--------------------|
| 0.4142828777984520 | 0.8184173209281429 | 0.0076229724043127 |
| 0.2553228931584645 | 0.7065010475429535 | 0.9488672989723733 |
| 0.2964544830931002 | 0.6850713745711776 | 0.5687407623237263 |
| 0.2043837095568947 | 0.6289594782210983 | 0.3468573497241136 |
| 0.3238122940322729 | 0.5895150746309153 | 0.2897973931393031 |
| 0.3415453834613987 | 0.6447406616512988 | 0.9056472466819517 |
| 0.4070122445078014 | 0.6162657578898127 | 0.6942792789360822 |
| 0.4949209734039742 | 0.6925969254047943 | 0.3120637763600172 |
| 0.6004744932342008 | 0.7708866106259209 | 0.4841536800080685 |
| 0.7389121344467222 | 0.4451369339827306 | 0.4100440767835839 |
| 0.6992074728201422 | 0.3921942077529753 | 0.8024087398212206 |
| 0.7931435863942187 | 0.4203698126508477 | 0.0153172613454045 |
| 0.6878459108200651 | 0.2662690317497799 | 0.0751554676756726 |
| 0.6725499180348363 | 0.3047504058804041 | 0.4673262915799852 |
| 0.6087183701339599 | 0.2151869693321472 | 0.6788906891647152 |
| 0.5526438986533244 | 0.3167440020112627 | 0.7412835833246324 |
| 0.6084386669062847 | 0.3315782782216055 | 0.1346957380985929 |
| 0.5787088758731032 | 0.3941103158790281 | 0.3457145802099984 |
| 0.4815599161117775 | 0.8382142401615846 | 0.5308727123421072 |
| 0.4727548101339359 | 0.8537474822960253 | 0.3280885875963109 |
| 0.5132018852028142 | 0.9250186382189340 | 0.2591563322878587 |
| 0.5628930300410341 | 0.9818275469568062 | 0.3801250729951637 |
| 0.5733352822083990 | 0.9654420819774011 | 0.5770827418245514 |
| 0.5342445483707273 | 0.8959006366548062 | 0.6500132066015862 |
| 0.4201510827770500 | 0.7993761715764622 | 0.1836540221330374 |
| 0.1863718349391199 | 0.6766295967848666 | 0.8663997611741504 |
| 0.1694549971416684 | 0.6508950026994467 | 0.6658998628621460 |
| 0.0944952241350119 | 0.6174864962977669 | 0.5987045769470901 |
| 0.0353961295268769 | 0.6091438845809460 | 0.7197792117577075 |
| 0.0531475807037743 | 0.6372362116872645 | 0.9149239658467440 |
| 0.1263447821516865 | 0.6703414468451845 | 0.9860487076195903 |
| 0.2263891692983230 | 0.6551126458213627 | 0.5213170084192470 |
| 0.3429092659218311 | 0.5447391338331683 | 0.2017175405746952 |
| 0.3669279966505301 | 0.5503238928439130 | 0.9988083678609713 |
| 0.3902118259065091 | 0.5024642784491813 | 0.9267927348518078 |
| 0.3906379433863929 | 0.4489089699187497 | 0.0446612807827760 |
| 0.3633538024316950 | 0.4415627719718016 | 0.2408849827604827 |
| 0.3396782179036191 | 0.4875188016513662 | 0.3166100843218238 |
| 0.3721611148315401 | 0.6064364028858066 | 0.8594734468266545 |
| 0.5620013588698408 | 0.7468441486299707 | 0.3239697349435994 |
| 0.5683072253815531 | 0.7497519362470183 | 0.9533089437112975 |
| 0.5908472488251894 | 0.6923341569497036 | 0.9073636583236764 |
| 0.8070095459722519 | 0.4849752002722916 | 0.4964032434062632 |
| 0.8249387529803553 | 0.4779364602944436 | 0.6985870810149222 |
| 0.8995447963434212 | 0.5197467657459470 | 0.7666817216984690 |
| 0.9569972140206124 | 0.5694845146701782 | 0.6462854399429944 |

|                    |                    |                    |
|--------------------|--------------------|--------------------|
| 0.9377671199990432 | 0.5781880411921438 | 0.4502820048038389 |
| 0.8651644569891772 | 0.5374922716292011 | 0.3776987542194064 |
| 0.7704761594750177 | 0.4277125131598187 | 0.8447390288077299 |
| 0.6614731721563449 | 0.2007649324171689 | 0.1596978572337152 |
| 0.6363752761607078 | 0.1838587235503492 | 0.3613886578602575 |
| 0.6054406395884923 | 0.1122854147667706 | 0.4279658364420026 |
| 0.5998010521904237 | 0.0567647896761372 | 0.3066218645928845 |
| 0.6279611920968380 | 0.0748357724480707 | 0.1111194336428480 |
| 0.6580223180656147 | 0.1445404417230184 | 0.0399119975056790 |
| 0.6386771732328426 | 0.2364898629336418 | 0.5085905261493660 |
| 0.5116709455949519 | 0.3435072411201142 | 0.8252829672496769 |
| 0.5188760448126474 | 0.3673934640324233 | 0.0277178480151314 |
| 0.4761941076234080 | 0.3987695652469045 | 0.0939583619033860 |
| 0.4259157876112014 | 0.4071507472015549 | 0.9714220022210927 |
| 0.4164380568365054 | 0.3802201687992540 | 0.7752456345725265 |
| 0.4576068332547821 | 0.3490130564020348 | 0.7047280705129050 |
| 0.5712005060536455 | 0.3646157114628230 | 0.1756207600367636 |
| 0.5937018878621886 | 0.6130515845793202 | 0.6251451631768977 |
| 0.5432183253292877 | 0.5670042349293462 | 0.4546768015553193 |
| 0.6043970709972882 | 0.5668883897484169 | 0.7816594791997051 |
| 0.5022020360229582 | 0.9350006952939609 | 0.1066802146026855 |
| 0.6136791060536358 | 0.0085579733844767 | 0.6734585977526790 |
| 0.5425042962856441 | 0.8836356931655815 | 0.8026492231803831 |
| 0.0835332588024345 | 0.5958449098919165 | 0.4475105334675012 |
| 0.0082547939850633 | 0.6334201951869267 | 0.0112553786257137 |
| 0.1397720942375284 | 0.6919875824295499 | 0.1371359996193162 |
| 0.4099822210232826 | 0.5093479951774791 | 0.7733145638847601 |
| 0.3608133468118602 | 0.3984585413213609 | 0.3342552413662465 |
| 0.3183473466287456 | 0.4816113650858354 | 0.4683031738889948 |
| 0.5743551044837640 | 0.7028404304076329 | 0.6089016106598666 |
| 0.5904521574702737 | 0.7917975358747309 | 0.8376563181355405 |
| 0.5068881944245071 | 0.7259220864137846 | 0.9526887082521430 |
| 0.6525202193827270 | 0.7173930153392180 | 0.9029414237633965 |
| 0.5693241831454842 | 0.6509020632994258 | 0.0236358019802768 |
| 0.9117058631917393 | 0.5104095974350437 | 0.9185802762896775 |
| 0.9811728639568188 | 0.6182598924145951 | 0.3541028835487816 |
| 0.8510021366857315 | 0.5443747694616287 | 0.2254734745757175 |
| 0.5836922543745229 | 0.1009747891479322 | 0.5795534220625389 |
| 0.6264403496770302 | 0.0329189138782716 | 0.0141455600254272 |
| 0.6794746349983785 | 0.1578604972684905 | 0.8882760329211176 |
| 0.4859129914802882 | 0.4193290610061740 | 0.2461368677265176 |
| 0.3755647863692821 | 0.3838206184953196 | 0.6773519083621984 |
| 0.4500365341466736 | 0.3283595089077523 | 0.5527535737369954 |
| 0.5026730415410704 | 0.6289462823473396 | 0.7126894964390234 |
| 0.5287005987468780 | 0.5983354639187595 | 0.3519863396140664 |
| 0.4903159315544106 | 0.5230020865980635 | 0.5130988099922584 |

|                    |                    |                    |
|--------------------|--------------------|--------------------|
| 0.5712683231273183 | 0.5423624410998787 | 0.3717402138984221 |
| 0.6511265250493962 | 0.8188201244175525 | 0.1632335732507195 |
| 0.6454115324626150 | 0.5990284937023771 | 0.8972089609059466 |
| 0.6253839339269779 | 0.5343047279656732 | 0.7069840884224478 |
| 0.5509938280534120 | 0.5293919693208525 | 0.8536840708081117 |
| 0.6490399814407539 | 0.6529350838462207 | 0.5662207188566074 |
| 0.5963370942933702 | 0.7806172389725945 | 0.1484315564224481 |
| 0.5613541148054508 | 0.6578068032354915 | 0.7096482077957484 |

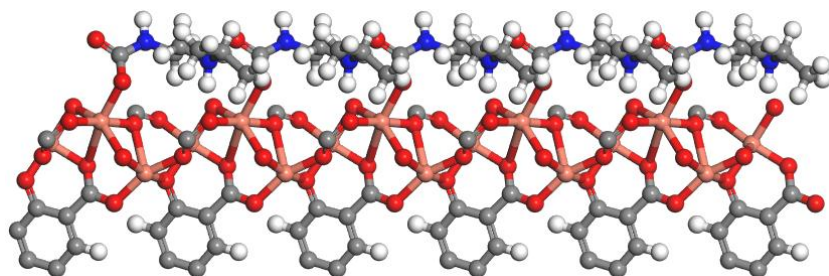

more stable-CO<sub>2</sub>-i-2-Cu<sub>2</sub>(dobpdc)

1.00000000000000

|                      |                     |                    |
|----------------------|---------------------|--------------------|
| 20.6761631499431289  | 0.0224495347899948  | 0.0395668945304480 |
| -10.4763858830187875 | 18.8590104676172032 | 0.0433404656035511 |
| -0.0638811942300004  | -0.0225305026605096 | 6.2744415211284643 |

| Cu | O  | C  | H  | N |
|----|----|----|----|---|
| 6  | 20 | 48 | 32 | 2 |

Direct

|                    |                    |                    |
|--------------------|--------------------|--------------------|
| 0.3413199209151614 | 0.7467831381664425 | 0.7787318303940154 |
| 0.2788162548139326 | 0.6361534521391903 | 0.1191167709495176 |
| 0.4093728229247660 | 0.6847495685745812 | 0.4410360865373875 |
| 0.7212099581514337 | 0.3459601972143744 | 0.2529769059558902 |
| 0.6031080905080515 | 0.2780295513653357 | 0.9179113677516852 |
| 0.6485170644842881 | 0.3906499349761390 | 0.5843585218835301 |
| 0.4350602862999082 | 0.7697728862905393 | 0.6236444129935350 |
| 0.3949734405909169 | 0.7318272986488878 | 0.1950640472341547 |
| 0.3944699761513206 | 0.8174115610332606 | 0.9994826628517686 |
| 0.2504888378225729 | 0.6995977125101689 | 0.9531890453733496 |
| 0.2883724440649189 | 0.7038564599591268 | 0.5199154956449092 |
| 0.2026905218261703 | 0.6140282442668195 | 0.3324020547335280 |
| 0.3270839736870954 | 0.5931763594970931 | 0.2902640392663258 |
| 0.3252806717926120 | 0.6292750127439106 | 0.8552690688901095 |
| 0.4169405257843479 | 0.6266272304458198 | 0.6781138050630489 |
| 0.5120956439214126 | 0.7025737587620497 | 0.2989119113551695 |
| 0.6109858181581274 | 0.7864310237384231 | 0.4828060315175051 |
| 0.7391017342226505 | 0.4344274141482316 | 0.4125506942677575 |
| 0.7018063352373431 | 0.4001342248324917 | 0.8466621411477462 |
| 0.7933577120619901 | 0.4003848511646808 | 0.0352964098428998 |
| 0.6764765153778640 | 0.2588094516013726 | 0.0790348028432746 |
| 0.6774293036564316 | 0.2954788003751148 | 0.5127403673550717 |
| 0.5880550772745750 | 0.2089173550535719 | 0.6985388133552846 |

|                    |                    |                    |
|--------------------|--------------------|--------------------|
| 0.5562869719971175 | 0.3222070984487928 | 0.7421814381709666 |
| 0.5930003897037963 | 0.3199071922680474 | 0.1784870928979458 |
| 0.5916195950003384 | 0.4069606957936074 | 0.3635488846798722 |
| 0.4726440552990496 | 0.8351759587342897 | 0.5389043555456539 |
| 0.4609207164128506 | 0.8518700869543849 | 0.3270972501948179 |
| 0.4975989169137804 | 0.9225310543427057 | 0.2575636671672328 |
| 0.5484960440548576 | 0.9770416069351384 | 0.3875178519014852 |
| 0.5630579361589625 | 0.9591905023801672 | 0.5914259305888621 |
| 0.5264475621244173 | 0.8901803663710623 | 0.6662556319434643 |
| 0.4136763779587795 | 0.7973615731314609 | 0.1690352622745266 |
| 0.1816623382000486 | 0.6682435648184963 | 0.8698480682747274 |
| 0.1645625575964402 | 0.6397659829382221 | 0.6599433788056572 |
| 0.0904629655054237 | 0.6017005160144038 | 0.5931911226837414 |
| 0.0326627516438620 | 0.5941864422365981 | 0.7235624299142458 |
| 0.0506993907306352 | 0.6267419960503986 | 0.9251388875687852 |
| 0.1232176095942137 | 0.6631229708729336 | 0.9975002640733948 |
| 0.2222037726914152 | 0.6528187160027699 | 0.4995907654485521 |
| 0.3468265091147344 | 0.5485461843840724 | 0.2026389017343391 |
| 0.3741957744923710 | 0.5560832362829231 | 0.9908531171773376 |
| 0.4007440976477028 | 0.5112451329600702 | 0.9187682571427374 |
| 0.3987486431148000 | 0.4570240864237434 | 0.0456932849178031 |
| 0.3669592985688226 | 0.4469950434260781 | 0.2487367026813061 |
| 0.3410319915866467 | 0.4909892173325474 | 0.3257131637118320 |
| 0.3724171538241450 | 0.6075179914322462 | 0.8367243351120308 |
| 0.5733385547913628 | 0.7608937363143298 | 0.3117830613344807 |
| 0.5791537895441152 | 0.7640297412537080 | 0.9228183408917872 |
| 0.6044946458852678 | 0.7084042662672019 | 0.8961573219716570 |
| 0.8069734680557659 | 0.4740015525840136 | 0.4988495121200529 |
| 0.8262038612064657 | 0.4642882381358433 | 0.7099653973818079 |
| 0.9000972072986215 | 0.5029704878904866 | 0.7790401161910907 |
| 0.9549316407515605 | 0.5539125414408588 | 0.6497583865594478 |
| 0.9339852586246238 | 0.5661569152006436 | 0.4467744951381292 |
| 0.8619382205612709 | 0.5275606426401538 | 0.3721281346600733 |
| 0.7707650886951569 | 0.4183119578306744 | 0.8685530521464031 |
| 0.6500728376975786 | 0.1935367669122598 | 0.1645471825431102 |
| 0.6211538210916743 | 0.1759981924360616 | 0.3745139316773276 |
| 0.5876220593321619 | 0.1051519898559405 | 0.4425812835549223 |
| 0.5852779116079248 | 0.0514731414727834 | 0.3136045877802616 |
| 0.6186489919802014 | 0.0704800895769537 | 0.1121253095049610 |
| 0.6505564062327664 | 0.1396721663505573 | 0.0384313226993598 |
| 0.6285972614094817 | 0.2297661977674110 | 0.5330973748573484 |
| 0.5153251624452295 | 0.3490784235623110 | 0.8257500723175468 |
| 0.5251288381391888 | 0.3759019170290046 | 0.0372736682600348 |
| 0.4854262438982673 | 0.4095461807444138 | 0.1045681750200558 |
| 0.4339832288294403 | 0.4154447599710167 | 0.9727958076365724 |
| 0.4209543137360257 | 0.3843259577524023 | 0.7694199472641827 |

|                    |                    |                    |
|--------------------|--------------------|--------------------|
| 0.4600220572249754 | 0.3514279494461690 | 0.6971860438945257 |
| 0.5732724062940520 | 0.3676007704487247 | 0.1979056157091819 |
| 0.6027213051911673 | 0.6212340673144183 | 0.6162840698598870 |
| 0.5512328235459094 | 0.5727620599376237 | 0.4420544503632939 |
| 0.6143197250379444 | 0.5788917418869417 | 0.7936288314478688 |
| 0.4843925426965043 | 0.9337606730984476 | 0.0983801186626678 |
| 0.6047705558715393 | 0.0008543328197277 | 0.6915852298035645 |
| 0.5382287464257729 | 0.8767522828176695 | 0.8241401334542360 |
| 0.0793202505117350 | 0.5776792851563783 | 0.4352091657729815 |
| 0.0064191383252989 | 0.6237994669021845 | 0.0253697758039593 |
| 0.1368323266374887 | 0.6883539190277546 | 0.1536681330179803 |
| 0.4234322817787728 | 0.5197936132057421 | 0.7584934986435314 |
| 0.3625701624340394 | 0.4032696354272360 | 0.3469448200617720 |
| 0.3157510824327119 | 0.4825512134818339 | 0.4824480191212857 |
| 0.5833582951296421 | 0.7097552681431267 | 0.5851677924812293 |
| 0.6004867538544758 | 0.8025104446461881 | 0.7916206935042638 |
| 0.5184912029370210 | 0.7381651719999525 | 0.9145758819169956 |
| 0.6650327232524873 | 0.7340561972079271 | 0.8828551417516337 |
| 0.5865401043573684 | 0.6721945674247394 | 0.0328266401673503 |
| 0.9136323016975041 | 0.4917054766833076 | 0.9377603617236971 |
| 0.9756896293950987 | 0.6074553760291082 | 0.3468879825079796 |
| 0.8462478880801712 | 0.5372529966040602 | 0.2143742179930399 |
| 0.5626952839296067 | 0.0929900026520443 | 0.6002205556806786 |
| 0.6196188883274871 | 0.0295836481091882 | 0.0126216781461608 |
| 0.6762322915893577 | 0.1539528463337589 | 0.8820418657535711 |
| 0.4969126596806177 | 0.4322968974947869 | 0.2639826223946145 |
| 0.3788815112934287 | 0.3859351743256809 | 0.6670414871999171 |
| 0.4494055328673525 | 0.3271609884683926 | 0.5397390254130769 |
| 0.5147609517926384 | 0.6399785182788946 | 0.7067476342110197 |
| 0.5344344216409453 | 0.6015229910363402 | 0.3298809592047931 |
| 0.5008335464908029 | 0.5298629417052041 | 0.5124789361271098 |
| 0.5787218502135261 | 0.5480284174987347 | 0.3550147391228720 |
| 0.6561634474042108 | 0.8382507640898993 | 0.1423369286066816 |
| 0.6558816891910197 | 0.6127224547480665 | 0.9113953051608235 |
| 0.6334053007303737 | 0.5442100207524661 | 0.7223374993625953 |
| 0.5623580864818720 | 0.5445471234544215 | 0.8769240668203864 |
| 0.6565920615942957 | 0.6586268834012898 | 0.5470874642988832 |
| 0.6033813035013154 | 0.7984438347381086 | 0.1265311404414433 |
| 0.5721918386821869 | 0.6675718781716569 | 0.6964875790630956 |

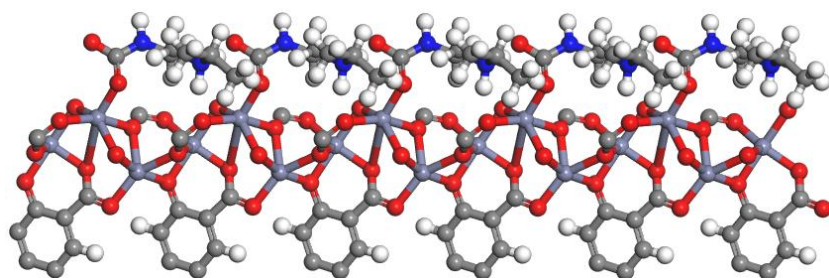

more stable-CO<sub>2</sub>-i-2-Zn<sub>2</sub>(dobpdc)

1.00000000000000

|                      |                     |                     |
|----------------------|---------------------|---------------------|
| 20.7386006095635551  | 0.0655814203208497  | -0.0135376356003786 |
| -10.4684835441967810 | 18.9832493936923505 | -0.0004049194707875 |
| -0.0805845249966124  | -0.0468867434036519 | 6.4701722835968560  |

|    |    |    |    |   |
|----|----|----|----|---|
| Zn | O  | C  | H  | N |
| 6  | 20 | 48 | 32 | 2 |

Direct

|                    |                    |                    |
|--------------------|--------------------|--------------------|
| 0.3440849145128482 | 0.7396917780606671 | 0.7796793703266616 |
| 0.2845733806164930 | 0.6481326290440776 | 0.1547442878497804 |
| 0.4223835170021530 | 0.6866062470450629 | 0.4373195151017271 |
| 0.7186631192175952 | 0.3488408715889832 | 0.2370516832530072 |
| 0.6098317376022351 | 0.2818697414324021 | 0.9002449652659550 |
| 0.6448312062509345 | 0.3832985270955120 | 0.5661051545467259 |
| 0.4378390628182274 | 0.7708212297077282 | 0.6047770109746153 |
| 0.3890230946515629 | 0.7340029876980054 | 0.1997496727602837 |
| 0.3986408375227768 | 0.8193265357676225 | 0.9889857279652787 |
| 0.2496508611492914 | 0.6978676876427130 | 0.9499638281725069 |
| 0.2842022396785779 | 0.7014625106419459 | 0.5209713730877183 |
| 0.1976137684501396 | 0.6123407456536896 | 0.3421460916750760 |
| 0.3363919064479504 | 0.5994046511425637 | 0.2942494795735584 |
| 0.3351724773471574 | 0.6379007419035716 | 0.8689383529447383 |
| 0.4218009109667449 | 0.6274288530809571 | 0.6924118566830160 |
| 0.5129074072151667 | 0.7031003889524357 | 0.2902694584013901 |
| 0.6099430215612145 | 0.7834777200481895 | 0.4824726164992228 |
| 0.7396214149794034 | 0.4349903242238540 | 0.4157829249761420 |
| 0.7018934795306109 | 0.3922796977707037 | 0.8354444469803468 |
| 0.7963672304416960 | 0.4042510770670447 | 0.0312037343536034 |
| 0.6765958852713823 | 0.2577042250049644 | 0.0814411486087820 |
| 0.6688473891963440 | 0.2949271547011776 | 0.4997935322230873 |
| 0.5889881861428208 | 0.2063758541852465 | 0.6904907965583078 |
| 0.5545664045051666 | 0.3226168486739809 | 0.7429340593683662 |
| 0.5998474793695010 | 0.3278235170467667 | 0.1655700523454726 |
| 0.5864544316229825 | 0.4060202561288335 | 0.3575936345817325 |
| 0.4723786042248719 | 0.8360833726041790 | 0.5230621424545134 |
| 0.4603341400258358 | 0.8529231397170918 | 0.3175708007646847 |
| 0.4967080589230832 | 0.9232565791867202 | 0.2524257547472217 |
| 0.5463487990418088 | 0.9776446577010773 | 0.3799635174091094 |
| 0.5600120833713760 | 0.9600552837949721 | 0.5790942120995553 |
| 0.5242937131006045 | 0.8913717252214823 | 0.6489092978774238 |
| 0.4128165997172246 | 0.7997351611947963 | 0.1615141364748496 |
| 0.1806661726761405 | 0.6656080284364521 | 0.8717957789627988 |
| 0.1627601253441568 | 0.6377103109087727 | 0.6670152138258203 |
| 0.0887108979516640 | 0.5999876743752068 | 0.6034507886542571 |
| 0.0315014058272283 | 0.5918588418906054 | 0.7309394320988432 |
| 0.0500266113181738 | 0.6230707394374946 | 0.9286651252525360 |

|                    |                    |                    |
|--------------------|--------------------|--------------------|
| 0.1224605443666533 | 0.6589807804190286 | 0.9978836069038692 |
| 0.2180527273787547 | 0.6504372092339779 | 0.5063705803831908 |
| 0.3519645397763327 | 0.5526738521561967 | 0.2031915615551654 |
| 0.3767071784859226 | 0.5587921140909557 | 0.9956361101358979 |
| 0.4004569739192689 | 0.5122066662866871 | 0.9228097207354793 |
| 0.3987655714037643 | 0.4582196802840102 | 0.0439213656541568 |
| 0.3690358750725267 | 0.4494465219087047 | 0.2425688081510700 |
| 0.3455837548261229 | 0.4949071296835044 | 0.3198929407810951 |
| 0.3783437728597221 | 0.6117829318224537 | 0.8465900807975544 |
| 0.5757120516685887 | 0.7599992832590203 | 0.3116484651506468 |
| 0.5829421621740707 | 0.7637910592059285 | 0.9312673007432650 |
| 0.6050831811466466 | 0.7064022442697038 | 0.8978779443634366 |
| 0.8071011284183598 | 0.4733854124980823 | 0.5041863823672514 |
| 0.8257121062792763 | 0.4638114755468337 | 0.7101234654728259 |
| 0.8992698767318430 | 0.5026829562616228 | 0.7798014579436696 |
| 0.9542846621444809 | 0.5525395188432256 | 0.6569068998706058 |
| 0.9338982926787551 | 0.5641206432822585 | 0.4582106913588930 |
| 0.8623911784848914 | 0.5257844285100219 | 0.3834486823570629 |
| 0.7722258470338730 | 0.4170853885834447 | 0.8635358200457404 |
| 0.6484364799195248 | 0.1927060465414669 | 0.1649973255308339 |
| 0.6200582015056710 | 0.1758462710088864 | 0.3686714747380933 |
| 0.5866613529282958 | 0.1053316886896027 | 0.4336510233670552 |
| 0.5828339530151680 | 0.0513695898584885 | 0.3083364743858468 |
| 0.6146864136299115 | 0.0695706342763032 | 0.1118036260332858 |
| 0.6467528888931398 | 0.1382474414574943 | 0.0416316848350462 |
| 0.6253441225390901 | 0.2280643173372852 | 0.5244702526789027 |
| 0.5149326277167035 | 0.3506140403777422 | 0.8256732103983282 |
| 0.5245245436895871 | 0.3767535714243877 | 0.0322309017906903 |
| 0.4842700418838319 | 0.4097882826772121 | 0.0980243009210895 |
| 0.4334652737434013 | 0.4166398663509341 | 0.9705915676175607 |
| 0.4214441679074952 | 0.3870871691596705 | 0.7708582322897186 |
| 0.4606941879918480 | 0.3546296638042108 | 0.7003263784802130 |
| 0.5733941761685770 | 0.3705267392877403 | 0.1900969814532374 |
| 0.6010882315490633 | 0.6197572610560940 | 0.6226963140179862 |
| 0.5500290860995349 | 0.5732577677736970 | 0.4498559207755335 |
| 0.6107473364486040 | 0.5761231542253640 | 0.7931828697743839 |
| 0.4838086002569355 | 0.9341267101722011 | 0.0971897604176277 |
| 0.6003528662979249 | 0.0014646042119679 | 0.6795256829362657 |
| 0.5355961512328378 | 0.8782451894336916 | 0.8030010586014527 |
| 0.0773034419427958 | 0.5769711527320567 | 0.4485938496064179 |
| 0.0064232215837805 | 0.6197032364997668 | 0.0284992929613779 |
| 0.1362313175504184 | 0.6833215046313583 | 0.1508553669947403 |
| 0.4214269621563531 | 0.5196698364319943 | 0.7660046173600321 |
| 0.3646726265709717 | 0.4059876584006403 | 0.3374419655199219 |
| 0.3223545513329569 | 0.4878293416464601 | 0.4738783564769591 |
| 0.5825532721297506 | 0.7080262232880870 | 0.5941678591963822 |



|                    |                    |                    |
|--------------------|--------------------|--------------------|
| 0.6059433535406171 | 0.8037916505660121 | 0.8099828463194569 |
| 0.5228549470979615 | 0.7409171099526191 | 0.9215673166077281 |
| 0.6651243049132560 | 0.7298986654433008 | 0.8862859896577291 |
| 0.5862352529140864 | 0.6696541436556913 | 0.0276306864287363 |
| 0.9123104785491734 | 0.4919467489080347 | 0.9349411059449082 |
| 0.9755074805735688 | 0.6045267651658577 | 0.3616015736052560 |
| 0.8472884520081578 | 0.5350144914289388 | 0.2290110723829244 |
| 0.5627998813535342 | 0.0938654627095588 | 0.5871566555024543 |
| 0.6144818313094760 | 0.0285848719389818 | 0.0133030443965083 |
| 0.6714411985661783 | 0.1518077620204679 | 0.8893535693200505 |
| 0.4951414382182904 | 0.4315209201799277 | 0.2542075216628703 |
| 0.3800612372623817 | 0.3894694002194541 | 0.6701040670289160 |
| 0.4507025762357202 | 0.3314634834370054 | 0.5458780581004916 |
| 0.5144128590529320 | 0.6397370063127852 | 0.7147877419348134 |
| 0.5363653327571711 | 0.6033608779079458 | 0.3380450598505433 |
| 0.4982106953741550 | 0.5323772735372359 | 0.5134833386215831 |
| 0.5760229509857027 | 0.5465061883886690 | 0.3691045889382352 |
| 0.6600366708318290 | 0.8353805691255332 | 0.1522919772794395 |
| 0.6523029777361913 | 0.6084704156261651 | 0.9094957851590024 |
| 0.6286448278219723 | 0.5408521467977820 | 0.7228224635974101 |
| 0.5586360110858237 | 0.5428523589602179 | 0.8713321131143488 |
| 0.6552151808931654 | 0.6562784763910656 | 0.5591960321233458 |
| 0.6081543289764966 | 0.7951989389563821 | 0.1338482866263888 |
| 0.5717557648149452 | 0.6668281596923649 | 0.7024098141682913 |

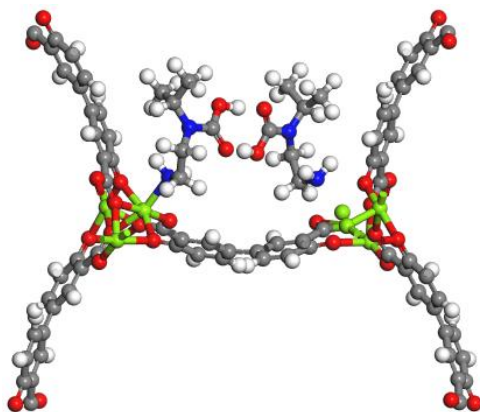

pair-CO<sub>2</sub>-i-2-Mg<sub>2</sub>(dobpdc)

1.0000000000000000

|                     |                     |                     |
|---------------------|---------------------|---------------------|
| 20.8226524968228972 | -0.0437186884573209 | -0.0080842102330091 |
| -9.1057102267442875 | 18.9503242219695487 | 0.0175297693560848  |
| -0.0022038306860557 | 0.0053701312042410  | 6.8902392164258606  |

|    |    |    |    |   |
|----|----|----|----|---|
| Mg | H  | C  | O  | N |
| 6  | 46 | 54 | 22 | 4 |

Direct

|                    |                    |                    |
|--------------------|--------------------|--------------------|
| 0.6600266740660321 | 0.2487370718088283 | 0.1403992583407378 |
| 0.7520568632662152 | 0.3085110446651810 | 0.8013893585180465 |
| 0.6890291986520958 | 0.3527837528183749 | 0.4593684857495468 |
| 0.3051243315720551 | 0.6086503383070100 | 0.8418749246781241 |

|                    |                    |                    |
|--------------------|--------------------|--------------------|
| 0.3646305503933097 | 0.6996945418561671 | 0.1808065620132854 |
| 0.4105687916283647 | 0.6382613739906678 | 0.5220108482137011 |
| 0.5338926655652935 | 0.3915444552967516 | 0.7631671123911420 |
| 0.6840771512217513 | 0.0974266733630679 | 0.1200437804795151 |
| 0.6231242156614514 | 0.9754102442304027 | 0.9916041865580166 |
| 0.5960842564862232 | 0.0588258552226866 | 0.4423748519873023 |
| 0.0144873864835132 | 0.5519292179703971 | 0.6424529450929135 |
| 0.8953948634021804 | 0.4776653826284674 | 0.7829096708477126 |
| 0.9424336796842151 | 0.4514386788048375 | 0.0884511836855632 |
| 0.4315424342169029 | 0.3686729438017250 | 0.3188610608750811 |
| 0.5075452773604681 | 0.3149681926790047 | 0.4516539662340310 |
| 0.4472062760937973 | 0.4818675214398813 | 0.2207952641985611 |
| 0.0282766923692344 | 0.5670888677601174 | 0.9892570027354741 |
| 0.1514814885296646 | 0.6296967645412552 | 0.8616529298855260 |
| 0.6066387903181281 | 0.9624489332700065 | 0.3371070944093513 |
| 0.1130605992114874 | 0.5423250509466517 | 0.5394509221303643 |
| 0.5331613787618300 | 0.8441819780404111 | 0.1969929847042902 |
| 0.3715176422924201 | 0.4580591980185827 | 0.5311794788883438 |
| 0.4220127586148080 | 0.3798503973732196 | 0.6656511594484885 |
| 0.5077619982261158 | 0.8888308900461993 | 0.8933573512293672 |
| 0.7819522936265357 | 0.4794743475936647 | 0.3400525747511392 |
| 0.5522491137745748 | 0.6640667177807534 | 0.5233702832949577 |
| 0.4917180824386924 | 0.6525382022790431 | 0.9092860011356675 |
| 0.5415546224978091 | 0.6103675447388293 | 0.8107607259238220 |
| 0.6845200125696483 | 0.4421846360302352 | 0.0839442096084938 |
| 0.6473999638235007 | 0.4839186485059712 | 0.2391173057457213 |
| 0.6190994716571829 | 0.6907308030379034 | 0.0376176159467038 |
| 0.5876038017941675 | 0.7550989379957250 | 0.9909072950538775 |
| 0.7112595113767539 | 0.5723609545673229 | 0.0097117239804585 |
| 0.7788208388838420 | 0.5434892699895600 | 0.9827373039125922 |
| 0.7789892512521350 | 0.7363615850766915 | 0.5422827556775979 |
| 0.8769849685666470 | 0.6059947026831987 | 0.0525801625248858 |
| 0.6892285129866015 | 0.6292708134410558 | 0.5046155928274227 |
| 0.6605750828482592 | 0.8470310221448387 | 0.9185512226760525 |
| 0.7265062463264723 | 0.4937521036632160 | 0.4794352117080691 |
| 0.5414755100467996 | 0.7313947445578715 | 0.6056469233671384 |
| 0.6557841642743947 | 0.8578791503678284 | 0.5593135503513904 |
| 0.7477564075699642 | 0.8761089123031571 | 0.5438525438076258 |
| 0.7211001937205925 | 0.9343008892381659 | 0.6718386668964259 |
| 0.7872460711503471 | 0.9200440194275208 | 0.9807240732755450 |
| 0.8114509515574635 | 0.8596926650251688 | 0.8556794127305235 |
| 0.7625303875359544 | 0.8340586574837598 | 0.0773727060040945 |
| 0.9228661317187105 | 0.6835774836799995 | 0.4405248618722077 |
| 0.9756757758108742 | 0.6602032108691127 | 0.2777826322789603 |
| 0.9027013761374649 | 0.5930721208327777 | 0.3994423440332868 |
| 0.8949474911963581 | 0.7541918983371543 | 0.1610406869864303 |

|                    |                    |                    |
|--------------------|--------------------|--------------------|
| 0.8625495141968256 | 0.7109039598495290 | 0.9340770021979506 |
| 0.9517861063901478 | 0.7335095350322810 | 0.0068107149343959 |
| 0.9212040807209275 | 0.6452198884194429 | 0.3306154803807841 |
| 0.8967427161095002 | 0.7148756602175925 | 0.0594637368802644 |
| 0.7694768822569883 | 0.8642043025805717 | 0.9423094840828387 |
| 0.7065779693726851 | 0.8786151517394635 | 0.6385203779770701 |
| 0.6752117802598052 | 0.1477567624789883 | 0.8557978056813030 |
| 0.5681670962878091 | 0.3420816542353765 | 0.9841381547467324 |
| 0.5252531921397842 | 0.3731503762513477 | 0.9132517878560439 |
| 0.4768876527403622 | 0.3848134142653171 | 0.0300565068364356 |
| 0.6298946250870376 | 0.0199544177025602 | 0.8981671754391860 |
| 0.6644787530266283 | 0.0880692910842099 | 0.9709120525305115 |
| 0.6230240628581585 | 0.3403008939820126 | 0.8509254017493030 |
| 0.8504194942535086 | 0.4230034883188581 | 0.5172396177024774 |
| 0.6513897207125229 | 0.1352509983218700 | 0.6589394227952228 |
| 0.6161458384814661 | 0.0656597305339558 | 0.5907533939266140 |
| 0.6039431289447443 | 0.0070299958310115 | 0.7060766012898693 |
| 0.9729093931123370 | 0.5135048584950205 | 0.5509403015986251 |
| 0.9064957429650062 | 0.4727950707987295 | 0.6301335894398351 |
| 0.6584622792865839 | 0.1917170405046301 | 0.5191331383974049 |
| 0.5638368643351847 | 0.3224372801896040 | 0.1848491335891627 |
| 0.8647005523303056 | 0.4177054614532165 | 0.3152406585649466 |
| 0.9331285265880650 | 0.4595598416617134 | 0.2402891391783230 |
| 0.9881488028356795 | 0.5076410117829874 | 0.3538057973802028 |
| 0.4704367642670803 | 0.3620242903878886 | 0.2250134048253116 |
| 0.5122843972196857 | 0.3316124088381779 | 0.3000787602078974 |
| 0.8112082415616877 | 0.3668688750892923 | 0.1806390940508730 |
| 0.2025844152701885 | 0.6220399334275424 | 0.1264060473278036 |
| 0.3995332222624954 | 0.5179471441354971 | 0.9986187539570032 |
| 0.4290251949691735 | 0.4739224373038431 | 0.0703891500619331 |
| 0.4389439365474289 | 0.4247712045828876 | 0.9542708242627684 |
| 0.0734001185612620 | 0.5747039607013029 | 0.0830068426354254 |
| 0.1421680150550661 | 0.6102091167968079 | 0.0107920431175437 |
| 0.3978243971844660 | 0.5722652832702061 | 0.1317420585690151 |
| 0.4795200649226595 | 0.7984186008033822 | 0.4639032184479150 |
| 0.1901030641142769 | 0.5982915821684751 | 0.3232674155223014 |
| 0.1198349978887265 | 0.5621690838501797 | 0.3909835894922217 |
| 0.0605387461212828 | 0.5489407177398716 | 0.2751234826343671 |
| 0.5688229471050426 | 0.9206856961140304 | 0.4293309219291903 |
| 0.5285943947352714 | 0.8547170078572938 | 0.3503234151091712 |
| 0.2472577647612640 | 0.6063062404433874 | 0.4635038968512857 |
| 0.3800247154281184 | 0.5140687341781713 | 0.7977764135776307 |
| 0.4744473726725842 | 0.8121615847804916 | 0.6662687140095934 |
| 0.5158626517801946 | 0.8800629439600126 | 0.7411100817908745 |
| 0.5632746694427641 | 0.9352549776696332 | 0.6270984783444068 |
| 0.4166128767520482 | 0.4192050005689513 | 0.7589068914651456 |

|                    |                    |                    |
|--------------------|--------------------|--------------------|
| 0.3880459921699151 | 0.4623078593354633 | 0.6828624604727435 |
| 0.4238511253833078 | 0.7587009391076911 | 0.8013805874594970 |
| 0.5377482828668794 | 0.6605735926008682 | 0.8178735555742300 |
| 0.6976779948639318 | 0.4839113319987481 | 0.1928480418828287 |
| 0.6035269666131567 | 0.7172634303780702 | 0.9209472376462907 |
| 0.7458161346100460 | 0.5540343897606460 | 0.0904221153700041 |
| 0.6964103325681461 | 0.7260279332810617 | 0.6949986707673608 |
| 0.8733358185572064 | 0.6430816617964601 | 0.1597895708039061 |
| 0.7721628677590440 | 0.6409613092056285 | 0.3515310663892092 |
| 0.6993795495606367 | 0.8380492263193691 | 0.8279861790662183 |
| 0.3562478841863426 | 0.5572667484259974 | 0.7144360368605230 |
| 0.3871808552879614 | 0.6954679651549009 | 0.7376346429631908 |
| 0.4234763019205134 | 0.5795755649736245 | 0.3017846403062225 |
| 0.4417018853374843 | 0.7358766712247654 | 0.3801402110227760 |
| 0.3128847283645980 | 0.6341912471817835 | 0.4075789085667430 |
| 0.4175799547907137 | 0.7748072190433146 | 0.9761049819650739 |
| 0.2679509443025864 | 0.6543939747697411 | 0.0469331524458252 |
| 0.3712298438914420 | 0.6138137510124926 | 0.0682554480465793 |
| 0.2303566454576200 | 0.5856075741868733 | 0.6379087353631077 |
| 0.6068516637603709 | 0.2981016428378859 | 0.2680417887191445 |
| 0.7473705230342556 | 0.3301837649583712 | 0.2444690836633184 |
| 0.6299019783851673 | 0.3651660006413942 | 0.6802163068041495 |
| 0.7066620748114467 | 0.2124617248572084 | 0.9354347924670485 |
| 0.6654921016908629 | 0.3147845360789055 | 0.9152329850167155 |
| 0.6376413042577119 | 0.1748962773276188 | 0.3448389998010249 |
| 0.7874494473587449 | 0.3847569372030354 | 0.6012495336618687 |
| 0.6857167526302730 | 0.2566238732434634 | 0.5753759566684576 |
| 0.8277857515261169 | 0.3605471470188114 | 0.0062889456034592 |
| 0.7574179994870465 | 0.7673131992499663 | 0.6085894668317270 |
| 0.7018333958314837 | 0.6074183918796217 | 0.3836666619156862 |
| 0.8126702563220980 | 0.6955032792819137 | 0.4431867890019114 |
| 0.6677073555721795 | 0.6593815594379353 | 0.6807702080276827 |
| 0.5229956349912290 | 0.6777231066689222 | 0.6197476843649903 |
| 0.7286185551879188 | 0.4645644380114898 | 0.3628517087812271 |
| 0.6654161542022645 | 0.7598856623734048 | 0.7997151727389378 |
| 0.7962747293251704 | 0.6108857852445446 | 0.2132068499495970 |

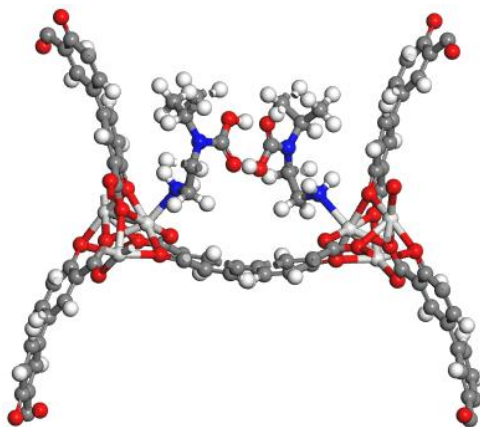

pair-CO<sub>2</sub>-i-2-Sc<sub>2</sub>(dobpdc)

1.00000000000000

20.7574818864813260 0.2122950847060734 0.3064411630692101

-8.8432977050733399 19.1137208217598982 -0.2964604395056159

0.1015337119941241 -0.0589605751079018 7.1964776874350154

Sc H C O N

6 46 54 22 4

Direct

0.6660427437061429 0.2397141626465356 0.1299822362850094

0.7681906971802590 0.3155503672843096 0.7857487251806958

0.6888954637467961 0.3467619304181184 0.4444615668742458

0.2980306075049270 0.6139941200704158 0.8419524755930610

0.3739296444296940 0.7150738798337670 0.1855047810992971

0.4070410329135754 0.6382171360180990 0.5274404411105564

0.5307748808783828 0.3843332790403622 0.7660522587847609

0.7068651255361615 0.1002600233738207 0.0874297835129809

0.6429519820364362 0.9787925220242997 0.9752664294805911

0.6135675470001587 0.0551441365591288 0.4499771471447289

0.0114239584605329 0.5667924033310427 0.6228840064602039

0.8938945166338428 0.4885313243698093 0.7514849023840640

0.9494302288634486 0.4721565635415601 0.0810620191239195

0.4298676634121392 0.3705249721011725 0.3044046990893321

0.5058046625129151 0.3163633450609353 0.4272553260350591

0.4402390825123135 0.4771992801799101 0.2111118456785164

0.0322430776489711 0.5855050658812999 0.9950178230922475

0.1552880312333329 0.6512072082028411 0.8838145801068364

0.6236580502493752 0.9590849912699966 0.3457023401817381

0.1104503950490070 0.5579975446663568 0.5204762993392009

0.5465472183828481 0.8424741056187699 0.2176623031842055

0.3762733790618995 0.4572332840652180 0.5465499737520005

0.4259293979743646 0.3783873668614604 0.6721018308484474

0.5303357021377195 0.8950762964013066 0.8894745842676315

0.7735280018429620 0.4765547587757197 0.3027859736488949

0.5572880377640246 0.6596550505921357 0.5529660637266147

0.4845357364011207 0.6461683852424684 0.9113468857885962

|                    |                    |                    |
|--------------------|--------------------|--------------------|
| 0.5354808941077067 | 0.6022356784466680 | 0.8218138541564812 |
| 0.6698025315316229 | 0.4383671619838054 | 0.0858207807223579 |
| 0.6357046767818986 | 0.4807556912159185 | 0.2496994787526745 |
| 0.6072253792250422 | 0.6774827487242234 | 0.0516503174785612 |
| 0.5778304460023307 | 0.7436426019567151 | 0.0102476839991823 |
| 0.6905279467815646 | 0.5662469475895548 | 0.0223661470486149 |
| 0.7585374887134577 | 0.5379722615278766 | 0.9740900563176638 |
| 0.7714907648696752 | 0.7250364268931833 | 0.5649199800675788 |
| 0.8563671508464310 | 0.6026184780258532 | 0.0153241916712687 |
| 0.6803529960414352 | 0.6216197112160557 | 0.5173460076631073 |
| 0.6543424296889313 | 0.8336087596912236 | 0.9647272727052965 |
| 0.7237283815207149 | 0.4952494975955730 | 0.4538745746658748 |
| 0.5423183446477537 | 0.7256912708661005 | 0.6332764166685934 |
| 0.6642832042794637 | 0.8546563685704385 | 0.6230592819060448 |
| 0.7548144395811676 | 0.8676591735488373 | 0.6265005487559918 |
| 0.7251634603435235 | 0.9240774398669203 | 0.7562511551302507 |
| 0.7784774817101692 | 0.8957328053661300 | 0.0529381782130756 |
| 0.8022883058785695 | 0.8346431858865131 | 0.9260849808876230 |
| 0.7459133616852895 | 0.8080369597029033 | 0.1269618771758729 |
| 0.9125294688563770 | 0.6845680535574417 | 0.3764526503754837 |
| 0.9605017382174807 | 0.6602066714095542 | 0.2002649488187274 |
| 0.8954398275733979 | 0.5952063673419374 | 0.3361733909845768 |
| 0.8672513805133946 | 0.7475981275631014 | 0.1335831722186285 |
| 0.8302992989831637 | 0.7024237297788929 | 0.9223159458770240 |
| 0.9216604030604643 | 0.7289548384019042 | 0.9646211984963102 |
| 0.9085163956943560 | 0.6453079266282913 | 0.2690264411557308 |
| 0.8688231766279841 | 0.7088317493623180 | 0.0306411809400799 |
| 0.7592540010012812 | 0.8412654327533389 | 0.0042547885291171 |
| 0.7108869192211245 | 0.8698469088774914 | 0.7105629573271202 |
| 0.6974238514483844 | 0.1477130164955227 | 0.8344577231525037 |
| 0.5656416598143963 | 0.3356959199156435 | 0.9745121726153059 |
| 0.5225713108085515 | 0.3676473241219895 | 0.9101033734825563 |
| 0.4749171531678726 | 0.3820102764094599 | 0.0244507426390044 |
| 0.6499611378657164 | 0.0216794735745651 | 0.8834270205110997 |
| 0.6858573422348186 | 0.0897629972147627 | 0.9471080780694621 |
| 0.6179953461101206 | 0.3298693440266405 | 0.8445485582473040 |
| 0.8545900824697270 | 0.4370571641123675 | 0.4915386255467169 |
| 0.6712103389688551 | 0.1337851833773556 | 0.6483040001089648 |
| 0.6349932677208159 | 0.0637878293990042 | 0.5892819701900081 |
| 0.6233892613099954 | 0.0072776655210660 | 0.7012927279896601 |
| 0.9725112632953525 | 0.5290501410681472 | 0.5316418182467970 |
| 0.9065941108397269 | 0.4860345787906084 | 0.6038123022551645 |
| 0.6757803812022871 | 0.1861388047299926 | 0.5133742212962105 |
| 0.5601880173614617 | 0.3185900804601474 | 0.1683223206458848 |
| 0.8694925496901504 | 0.4333049125132717 | 0.2954003319394261 |
| 0.9377948868250314 | 0.4779691090196465 | 0.2275952097661360 |

|                    |                    |                    |
|--------------------|--------------------|--------------------|
| 0.9894898235357275 | 0.5248211222979648 | 0.3411254241815556 |
| 0.4681764876938743 | 0.3617069421044263 | 0.2122341643899190 |
| 0.5099423683475379 | 0.3307754852358755 | 0.2813035739352330 |
| 0.8216200180198427 | 0.3844674619023252 | 0.1633230117803777 |
| 0.2037765895746446 | 0.6427513253265644 | 0.1369242583347372 |
| 0.3946247766011979 | 0.5147263567074489 | 0.0002992184638089 |
| 0.4243946169424859 | 0.4702362179958612 | 0.0662203546849156 |
| 0.4372589231242046 | 0.4220949090660326 | 0.9524500056410616 |
| 0.0759020680414864 | 0.5932755960863787 | 0.0869822292307347 |
| 0.1448648779903223 | 0.6301598465117166 | 0.0238973140565193 |
| 0.3893143682430917 | 0.5668019509372186 | 0.1295220442598719 |
| 0.4959859816614838 | 0.8021726638618247 | 0.4785815514714713 |
| 0.1898894383959231 | 0.6165269400143458 | 0.3228488566990677 |
| 0.1190007805055728 | 0.5793076582735139 | 0.3813023209108977 |
| 0.0615694635152124 | 0.5667145430156069 | 0.2688686229698192 |
| 0.5865709492129128 | 0.9199151185201231 | 0.4376205412870817 |
| 0.5442500764542544 | 0.8544794389786645 | 0.3657492802085116 |
| 0.2432663268339468 | 0.6221710734313675 | 0.4580358246350471 |
| 0.3786986845205433 | 0.5105545817148780 | 0.8057906774321140 |
| 0.4921577294696107 | 0.8163854861566975 | 0.6749996667459470 |
| 0.5363071947050457 | 0.8841037686765461 | 0.7426526545477330 |
| 0.5823871225922872 | 0.9360187558755229 | 0.6286402331150995 |
| 0.4181960331585302 | 0.4169238350927671 | 0.7637319177034243 |
| 0.3898546050453149 | 0.4603468151134535 | 0.6930621194272959 |
| 0.4436095037113290 | 0.7684710479497951 | 0.8074421830473213 |
| 0.5325662194682792 | 0.6529030626918839 | 0.8309352512691959 |
| 0.6847648988279929 | 0.4805559706321105 | 0.1904140517049910 |
| 0.5951222753531482 | 0.7060203125839095 | 0.9411775034648215 |
| 0.7279052768955552 | 0.5489911156237994 | 0.0874935613700245 |
| 0.6907697481602355 | 0.7146045890984141 | 0.7263067760415467 |
| 0.8539125782244739 | 0.6394899670855381 | 0.1237823833105054 |
| 0.7586726549038971 | 0.6347408881651404 | 0.3442953870843866 |
| 0.6947977400006238 | 0.8238880959378818 | 0.8815483898184979 |
| 0.3563353325804428 | 0.5548349329620237 | 0.7247016806293303 |
| 0.3989783414187897 | 0.7050728940562649 | 0.7546831663414579 |
| 0.4155804281624356 | 0.5753135128046694 | 0.2933199075729860 |
| 0.4551476190390176 | 0.7402074540563746 | 0.3975888666752283 |
| 0.3107979162386272 | 0.6559350396686838 | 0.4208197194442675 |
| 0.4429867950422164 | 0.7862082934326793 | 0.9803888347049750 |
| 0.2689733859306642 | 0.6780293107304871 | 0.0640016639974377 |
| 0.3587834094452163 | 0.6073126719357091 | 0.0796764142878885 |
| 0.2237710844665344 | 0.5933247139808628 | 0.6172435861562633 |
| 0.6040492347648154 | 0.2950101223160715 | 0.2488523764942130 |
| 0.7570983798629172 | 0.3407679817837845 | 0.2157595443010507 |
| 0.6263763657830879 | 0.3556961614495222 | 0.6804347805994340 |
| 0.7317124452885935 | 0.2120635167677776 | 0.9078403490540836 |

|                    |                    |                    |
|--------------------|--------------------|--------------------|
| 0.6585614457686191 | 0.2990564366060937 | 0.8928717903633441 |
| 0.6467798513380956 | 0.1665564016128727 | 0.3541649462164926 |
| 0.7922746567938503 | 0.3955317755046579 | 0.5729394933025205 |
| 0.7087613565973214 | 0.2528500507163187 | 0.5505927003774929 |
| 0.8403963816156548 | 0.3829598900388618 | 0.9914826632223068 |
| 0.7534665132359635 | 0.7544548039535997 | 0.6542886497745144 |
| 0.6904909958962833 | 0.6005553224598046 | 0.3932012835721679 |
| 0.7999153387296545 | 0.6885633098639730 | 0.4287995425905820 |
| 0.6606757332098852 | 0.6494852221879697 | 0.6955261454976096 |
| 0.5244233235387128 | 0.6724738940220547 | 0.6400551828866270 |
| 0.7216321764821458 | 0.4636748097056866 | 0.3412710948964062 |
| 0.6594795674151968 | 0.7479026271905553 | 0.8350522735229049 |
| 0.7798203314322834 | 0.6059356459973131 | 0.1972439531103731 |

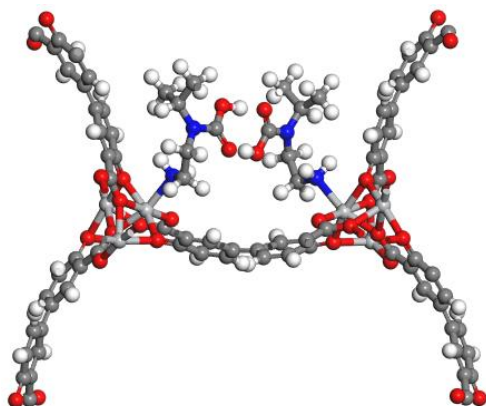

pair-CO<sub>2</sub>-i-2-Ti<sub>2</sub>(dobpdc)

1.0000000000000000

|                     |                     |                     |
|---------------------|---------------------|---------------------|
| 21.0029848880059049 | -0.1496514751194435 | -0.0445541206155915 |
| -9.2807897544330125 | 19.1006046788581010 | 0.0532578554507050  |
| -0.0147493405164489 | 0.0127854431518216  | 7.0462247310567472  |

Ti H C O N

6 46 54 22 4

Direct

|                    |                    |                    |
|--------------------|--------------------|--------------------|
| 0.6580993191277855 | 0.2447707939346841 | 0.1430241775065682 |
| 0.7561264449008860 | 0.3121969441797106 | 0.8048175448605832 |
| 0.6871678768433966 | 0.3521037432164675 | 0.4673033318640805 |
| 0.3021522620377510 | 0.6063887583465757 | 0.8358322966862488 |
| 0.3694698939682510 | 0.7031890446268250 | 0.1736456316572230 |
| 0.4109981264040101 | 0.6364276348230220 | 0.5099152487184071 |
| 0.5341229700848942 | 0.3920567209562051 | 0.7696907470061660 |
| 0.6851726269639116 | 0.0960082785606318 | 0.1171198741432491 |
| 0.6277575993697866 | 0.9746935374807251 | 0.9888974651835341 |
| 0.6040060148597917 | 0.0573734465612077 | 0.4479063594306183 |
| 0.0160562898752161 | 0.5610369477468922 | 0.6316020664949633 |
| 0.8979582053602186 | 0.4857072427862477 | 0.7719628491041419 |
| 0.9425729750813616 | 0.4589484717734962 | 0.0925041550447503 |
| 0.4310498419462192 | 0.3692429455820374 | 0.3105018285509757 |
| 0.5051952686561094 | 0.3151098971855930 | 0.4427797129620075 |



|                    |                    |                     |
|--------------------|--------------------|---------------------|
| 0.4476102135700302 | 0.4807388161353501 | 0.2113495795993714  |
| 0.0279009286810492 | 0.5707525874219783 | 0.9877641311561405  |
| 0.1506761249319268 | 0.6296907920441157 | 0.8604128891288170  |
| 0.6160715819442899 | 0.9639918751964416 | 0.3439560020108274  |
| 0.1120105946913128 | 0.5503061935002407 | 0.5307223123725322  |
| 0.5419341717907997 | 0.8466542871683700 | 0.2041380497476837  |
| 0.3739327659268952 | 0.4566914250791427 | 0.5351815424452511  |
| 0.4244362759529210 | 0.3799484810920077 | 0.6689629096420333  |
| 0.5159841303941519 | 0.8886447052023172 | 0.8857272333864046  |
| 0.7780016552876816 | 0.4816114623500454 | 0.3325683736825624  |
| 0.5569796460484611 | 0.6614889997097464 | 0.5285122987853157  |
| 0.4906567160600162 | 0.6492729148577965 | 0.8970103846189303  |
| 0.5394171649104180 | 0.6060154412402028 | 0.8084953409678235  |
| 0.6771331335241939 | 0.4426740538250371 | 0.0951156468426433  |
| 0.6420169662653592 | 0.4836445716481208 | 0.2517821949098860  |
| 0.6160716195220246 | 0.6832994699869843 | 0.0351610161051852  |
| 0.5867034542948417 | 0.7483852325179754 | 0.9917774222322535  |
| 0.7013625838914308 | 0.5714670963921833 | 0.0218061943641956  |
| 0.7685755908452592 | 0.5441776806239318 | 0.9864238073206124  |
| 0.7776142909555972 | 0.7334509873504587 | 0.5517750833215089  |
| 0.8671203951387767 | 0.6083135138721687 | 0.0431848646914830  |
| 0.6865366043592402 | 0.6274693863939618 | 0.51111763466448096 |
| 0.6611411648204921 | 0.8404230504753016 | 0.9298845666482265  |
| 0.7261301186206595 | 0.4973227285253898 | 0.4760933632687738  |
| 0.5461266969817942 | 0.7284713165260612 | 0.6050837808291476  |
| 0.6581434294103801 | 0.8547181198273321 | 0.5799183705641511  |
| 0.7493059395403847 | 0.8720079658717026 | 0.5661501598307979  |
| 0.7238786099084251 | 0.9294191870822957 | 0.6941070558098446  |
| 0.7873934638288205 | 0.9123590304606850 | 0.9962704011481804  |
| 0.8109319703271325 | 0.8528733660799759 | 0.8727274852544724  |
| 0.7609783637409038 | 0.8260949094659154 | 0.0871612987624601  |
| 0.9179708600275305 | 0.6829475929326350 | 0.4240782023272445  |
| 0.9685974101290711 | 0.6618383537291734 | 0.2555735031622675  |
| 0.8976407343484709 | 0.5935688717419296 | 0.3767574110041565  |
| 0.8870112795531213 | 0.7546971811812568 | 0.1609342995528138  |
| 0.8516754074989805 | 0.7127757007067430 | 0.9394713142918221  |
| 0.9413782401822104 | 0.7354717255747971 | 0.0009961263250702  |
| 0.9150115851928859 | 0.6458575891065337 | 0.3127240629049410  |
| 0.8873219864490736 | 0.7162886655940213 | 0.0578864211167414  |
| 0.7690671943249185 | 0.8570631036581062 | 0.9563023783442333  |
| 0.7084697403765787 | 0.8742050114729167 | 0.6586410871899915  |
| 0.6775549816218103 | 0.1454395468723177 | 0.8567888181658958  |
| 0.5670786459749806 | 0.3421446545666811 | 0.9865673273754325  |
| 0.5248998204130331 | 0.3732922644290824 | 0.9160359954910859  |
| 0.4767921281736704 | 0.3847484908428811 | 0.0286473026352354  |
| 0.6348440786212990 | 0.0189172262579191 | 0.8970907039259970  |

|                    |                    |                    |
|--------------------|--------------------|--------------------|
| 0.6671840265608893 | 0.0866286333120811 | 0.9697653773493400 |
| 0.6208665741735047 | 0.3399836724419245 | 0.8589659962489620 |
| 0.8529277545051102 | 0.4310269303514858 | 0.5131583795460415 |
| 0.6556036161387837 | 0.1339474257309305 | 0.6625166810499294 |
| 0.6231707004862059 | 0.0645796928752702 | 0.5938773114019611 |
| 0.6114154142432184 | 0.0064921684662949 | 0.7065787411635469 |
| 0.9743897934898058 | 0.5223137349680442 | 0.5433716134958004 |
| 0.9084933115649605 | 0.4809573234222597 | 0.6223176759331750 |
| 0.6597815838969936 | 0.1890286644691912 | 0.5306208722857377 |
| 0.5608901379865472 | 0.3220809401109221 | 0.1828977613012697 |
| 0.8653065295757969 | 0.4246128184084341 | 0.3151405848544613 |
| 0.9334426681847887 | 0.4672955479449357 | 0.2405029406562207 |
| 0.9883883945276253 | 0.5158057671359941 | 0.3500826146530827 |
| 0.4694745398432403 | 0.3622957426648910 | 0.2198168425054945 |
| 0.5103004527646462 | 0.3316616191555255 | 0.2943715582837356 |
| 0.8125583498625915 | 0.3736100384444185 | 0.1884011219730581 |
| 0.2008947914056236 | 0.6237265352050372 | 0.1217745015613900 |
| 0.4002289709341511 | 0.5162134086500174 | 0.9928818641615962 |
| 0.4295596890951003 | 0.4727272741830788 | 0.0641934227713250 |
| 0.4396418524997259 | 0.4242216158176007 | 0.9516994804903192 |
| 0.0727662164526421 | 0.5788973132008621 | 0.0801352269267568 |
| 0.1412835261927725 | 0.6120757477111880 | 0.0079789245432380 |
| 0.3981553721818116 | 0.5693581907630403 | 0.1207988745470914 |
| 0.4885349271323776 | 0.8007095276885963 | 0.4644231538536516 |
| 0.1893759295173325 | 0.6022208846688670 | 0.3162435949275348 |
| 0.1191811587133529 | 0.5690075761454167 | 0.3844484843206715 |
| 0.0603299845301777 | 0.5559807614451984 | 0.2709115651355987 |
| 0.5781269910306648 | 0.9220633949642547 | 0.4329820257163774 |
| 0.5374987669141760 | 0.8565846166539188 | 0.3543722633273845 |
| 0.2453268553633237 | 0.6075420553948447 | 0.4486489550452291 |
| 0.3809335774929110 | 0.5111379181140592 | 0.7959742639781169 |
| 0.4821971350760350 | 0.8124809577933405 | 0.6628203852084980 |
| 0.5243116104665120 | 0.8801024077146451 | 0.7372670550053755 |
| 0.5719478272108773 | 0.9352769998839250 | 0.6270437192598237 |
| 0.4183510321927599 | 0.4184729233878244 | 0.7595819339567953 |
| 0.3897973979714493 | 0.4607651261354846 | 0.6841296761920859 |
| 0.4315077454124605 | 0.7597218483050270 | 0.7900109124158448 |
| 0.5374770885162263 | 0.6565937916968565 | 0.8137845609574512 |
| 0.6915517035074714 | 0.4845811096499020 | 0.2005041456641408 |
| 0.6024380762571226 | 0.7113465830953558 | 0.9219585275305278 |
| 0.7372876374287998 | 0.5542877464463984 | 0.0960563863546753 |
| 0.6962501558260428 | 0.7219712109941483 | 0.7055991050076855 |
| 0.8651342667681448 | 0.6444037396576761 | 0.1520756123839888 |
| 0.7671390184322249 | 0.6405983532685298 | 0.3521573115927339 |
| 0.6999508355340467 | 0.8322444798245172 | 0.8417228338844822 |
| 0.3565501476310615 | 0.5531252284283497 | 0.7112881619824520 |

|                    |                    |                    |
|--------------------|--------------------|--------------------|
| 0.3947688686580477 | 0.6953410261944200 | 0.7305259448098553 |
| 0.4259157068229769 | 0.5787908507472110 | 0.2869263261555801 |
| 0.4497374172491320 | 0.7384551750103938 | 0.3793704092383123 |
| 0.3109849373251450 | 0.6315040182907765 | 0.3939739919384593 |
| 0.4225286118969507 | 0.7757754565745500 | 0.9606987899921293 |
| 0.2661589036138139 | 0.6543709947647045 | 0.0428130596797445 |
| 0.3693650729768123 | 0.6092229646516216 | 0.0621359973717475 |
| 0.2288852293167878 | 0.5871686448969271 | 0.6214021190191872 |
| 0.6025202165277150 | 0.2970060892698356 | 0.2677442971750210 |
| 0.7474801978712264 | 0.3368958974750029 | 0.2478354076534970 |
| 0.6301860334297800 | 0.3672073147520010 | 0.6923689378785127 |
| 0.7074392965931295 | 0.2098855663231518 | 0.9361804120563448 |
| 0.6611764454888842 | 0.3116401539805977 | 0.9178374607574398 |
| 0.6387771948488137 | 0.1725685584955983 | 0.3582595844510408 |
| 0.7903117307577148 | 0.3915638279195690 | 0.5985625231912053 |
| 0.6834733898636216 | 0.2539009325742754 | 0.5851963365840263 |
| 0.8292193372697909 | 0.3645599428968040 | 0.0183712242566898 |
| 0.7576105394257340 | 0.7635876088213180 | 0.6244299473669130 |
| 0.6975183025097138 | 0.6067043837639261 | 0.3891907151393212 |
| 0.8088213087628162 | 0.6944570177775873 | 0.4415057374170885 |
| 0.6668408114920510 | 0.6558055915887238 | 0.6873977566305456 |
| 0.5267022025673143 | 0.6749705217876496 | 0.6177309352229017 |
| 0.7255505251661987 | 0.4670957584200224 | 0.3626549841401570 |
| 0.6655704356714764 | 0.7547854036548429 | 0.8094544626200317 |
| 0.7891767038693587 | 0.6116362552274310 | 0.2114812087308593 |

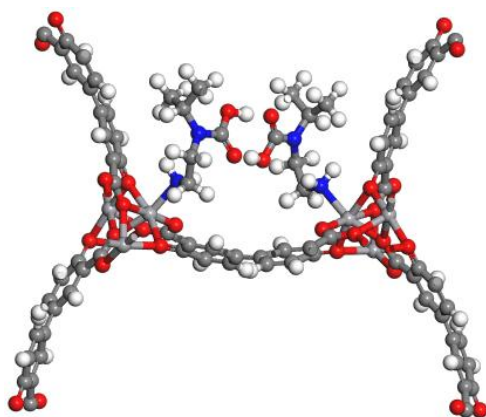

pair-CO<sub>2</sub>-i-2-V<sub>2</sub>(dobpdc)

1.0000000000000000

|                     |                     |                     |
|---------------------|---------------------|---------------------|
| 20.9187177765805821 | -0.0663417064649742 | -0.0015852530605896 |
| -9.1681805308632001 | 19.0416265782252800 | 0.0044784099714888  |
| -0.0002484734683826 | 0.0016800190949422  | 7.0267244161554769  |

V H C O N

6 46 54 22 4

Direct

|                    |                    |                    |
|--------------------|--------------------|--------------------|
| 0.6575052312510010 | 0.2468019359026172 | 0.1422689758065872 |
| 0.7567060318006185 | 0.3093867309741114 | 0.8043811312336544 |

|                    |                    |                    |
|--------------------|--------------------|--------------------|
| 0.6905352631020563 | 0.3544856628327082 | 0.4661541081872045 |
| 0.3034533295224477 | 0.6060818310456710 | 0.8376990451302930 |
| 0.3659725796597257 | 0.7042494353820743 | 0.1750737449519093 |
| 0.4124252490656062 | 0.6396899682876054 | 0.5130035322947961 |
| 0.5338379557400188 | 0.3901849089965523 | 0.7711157131953783 |
| 0.6861270687919543 | 0.0958529254911369 | 0.1183144092620552 |
| 0.6257388847489764 | 0.9746621773933768 | 0.9897156392205275 |
| 0.6035538979419854 | 0.0596068619040011 | 0.4502244063404177 |
| 0.0178237185239141 | 0.5578447188217481 | 0.6348062202350562 |
| 0.8998068154615453 | 0.4843209277356806 | 0.7767124039497730 |
| 0.9418087453141268 | 0.4582028945012127 | 0.0929373977491750 |
| 0.4315653901646641 | 0.3714735943534819 | 0.3137617740644814 |
| 0.5056421357342344 | 0.3169651493387349 | 0.4473811014317164 |
| 0.4453613848233289 | 0.4812341133791591 | 0.2114386679005449 |
| 0.0275385004827058 | 0.5694991061094044 | 0.9882786832849746 |
| 0.1499480008416469 | 0.6314189598425841 | 0.8604792339219216 |
| 0.6127028373140035 | 0.9655214887125396 | 0.3422886804336258 |
| 0.1140068560122671 | 0.5498198150676927 | 0.5288193606695799 |
| 0.5402625318662331 | 0.8482091425877769 | 0.2009520516496579 |
| 0.3745024823383361 | 0.4565715675697390 | 0.5326687082090231 |
| 0.4257357984131431 | 0.3802291616866711 | 0.6681793102183562 |
| 0.5145351308255499 | 0.8883699125224069 | 0.8858914259880564 |
| 0.7780747731897222 | 0.4856013534329549 | 0.3581160651811643 |
| 0.5531232213640962 | 0.6563711431455346 | 0.5235699235265230 |
| 0.4890160170912452 | 0.6490922163437745 | 0.8937014349919536 |
| 0.5388576349865559 | 0.6056913651971456 | 0.8080249385650333 |
| 0.6846233956967396 | 0.4399780739461789 | 0.0958068667124437 |
| 0.6418123709449119 | 0.4791869217398812 | 0.2359321697084340 |
| 0.6144257302789100 | 0.6850260501373526 | 0.0332788880792023 |
| 0.5839165092749852 | 0.7494089426859603 | 0.9849104628368366 |
| 0.7042670094544619 | 0.5700409272703553 | 0.0214938128638025 |
| 0.7719359405760855 | 0.5425480431645937 | 0.9864378761568844 |
| 0.7766771509653623 | 0.7326627807616077 | 0.5488844618437980 |
| 0.8703219797535340 | 0.6055254807618056 | 0.0491300976656035 |
| 0.6864686423415165 | 0.6261319123284679 | 0.5093539986866418 |
| 0.6587968728395737 | 0.8411620962288495 | 0.9246296036375981 |
| 0.7168633069062693 | 0.4946499913507765 | 0.4830145141597910 |
| 0.5470156351511548 | 0.7268411474720438 | 0.5957772258157519 |
| 0.6557757181138797 | 0.8547364858180586 | 0.5734810291370493 |
| 0.7470906535117976 | 0.8717873482641565 | 0.5594434930370937 |
| 0.7212547922349657 | 0.9296802163909206 | 0.6874635342506465 |
| 0.7848290952597949 | 0.9129276106164426 | 0.9908201201948188 |
| 0.8089795066377761 | 0.8532757736365753 | 0.8664084382556680 |
| 0.7590053644685071 | 0.8266485587033259 | 0.0816415243732749 |
| 0.9189644866493154 | 0.6823059104824054 | 0.4295167655409671 |
| 0.9706707232320113 | 0.6602669309456104 | 0.2639647707641330 |

|                    |                    |                    |
|--------------------|--------------------|--------------------|
| 0.8995482677752662 | 0.5925826801867089 | 0.3858416746339017 |
| 0.8879735745941701 | 0.7524366286449720 | 0.1614660645033936 |
| 0.8539376311625233 | 0.7094651281399180 | 0.9396825742355688 |
| 0.9436123926130193 | 0.7328041407686783 | 0.0042713001908581 |
| 0.9167804133718747 | 0.6445715661202769 | 0.3196973466701607 |
| 0.8892209631673396 | 0.7136267004225800 | 0.0597644306028897 |
| 0.7668896169007340 | 0.8575301960527497 | 0.9505604727221524 |
| 0.7061089045145295 | 0.8743069804161294 | 0.6522482535721110 |
| 0.6800847607980387 | 0.1468989416767386 | 0.8589338041806158 |
| 0.5670836449728256 | 0.3412053017765615 | 0.9898052530325714 |
| 0.5248325902792530 | 0.3724336779568915 | 0.9186263814801450 |
| 0.4767850602807471 | 0.3851525967674476 | 0.0305252896971453 |
| 0.6335986472341730 | 0.0192780061952860 | 0.8981260847079682 |
| 0.6677481617460757 | 0.0868680682790384 | 0.9709867362035851 |
| 0.6214201532486854 | 0.3395879502920778 | 0.8569001302350401 |
| 0.8529968501575738 | 0.4304540448403955 | 0.5172589267546925 |
| 0.6572979390103981 | 0.1353404238356148 | 0.6646002648452480 |
| 0.6227290520872941 | 0.0660722357638264 | 0.5963799622909463 |
| 0.6096471808159265 | 0.0072229837252706 | 0.7078955615263425 |
| 0.9756780413501502 | 0.5198921200146032 | 0.5460868880107483 |
| 0.9099370085831779 | 0.4795946167189413 | 0.6260871631472824 |
| 0.6630077833657282 | 0.1907790354850292 | 0.5267462389710147 |
| 0.5613643867786706 | 0.3219577684047792 | 0.1872083113347287 |
| 0.8655344873755766 | 0.4245338915679540 | 0.3180826915425499 |
| 0.9334245479002377 | 0.4663536188494390 | 0.2424061170651939 |
| 0.9892230445624364 | 0.5140680289712165 | 0.3514232325829525 |
| 0.4698779084783808 | 0.3637021192727588 | 0.2228005806828648 |
| 0.5105891118845278 | 0.3328655197623860 | 0.2981755026024899 |
| 0.8129499022872295 | 0.3731286031394632 | 0.1858414296872013 |
| 0.2018381710054911 | 0.6266793392308756 | 0.1204344245142863 |
| 0.3985909511806796 | 0.5165643363754455 | 0.9910388027290367 |
| 0.4280961524980640 | 0.4731074930869781 | 0.0633154875450899 |
| 0.4394268019774827 | 0.4245207636159236 | 0.9518313722858451 |
| 0.0727689485590872 | 0.5782428102085859 | 0.0802241769954080 |
| 0.1410351886117098 | 0.6132333764532376 | 0.0078414172354613 |
| 0.3973558545246050 | 0.5705858217970814 | 0.1235837727535127 |
| 0.4873978091566471 | 0.8008125701504554 | 0.4614088794307136 |
| 0.1903365685325582 | 0.6040798819049300 | 0.3147557594927051 |
| 0.1203771721470730 | 0.5687171753415470 | 0.3825730895848451 |
| 0.0607962645221107 | 0.5545882797435766 | 0.2705139167858448 |
| 0.5753876357548506 | 0.9232563852561668 | 0.4316293118611298 |
| 0.5357377978710716 | 0.8578919825394209 | 0.3519619989697276 |
| 0.2465779692415069 | 0.6107387436377039 | 0.4528685687348073 |
| 0.3798496581366848 | 0.5115687367318245 | 0.7931819067902737 |
| 0.4814667272060476 | 0.8129551380123274 | 0.6607419297245798 |
| 0.5227463967337727 | 0.8803917982684055 | 0.7361866009720828 |

|                    |                    |                    |
|--------------------|--------------------|--------------------|
| 0.5697761878150516 | 0.9362642334280551 | 0.6267423887525467 |
| 0.4188765453137506 | 0.4187952030987532 | 0.7587711228468947 |
| 0.3899349549500002 | 0.4608006196057559 | 0.6822830066865393 |
| 0.4302044219127907 | 0.7604506854706443 | 0.7933550685618229 |
| 0.5360819450578305 | 0.6561602706894902 | 0.8107415623921028 |
| 0.6938299952504394 | 0.4821430067288190 | 0.1983398483848333 |
| 0.6004727082407371 | 0.7120631608331323 | 0.9176267472029807 |
| 0.7399851413495142 | 0.5524010497654004 | 0.0959739401629918 |
| 0.6947317118245167 | 0.7217292341688122 | 0.7011541824640588 |
| 0.8673819838049823 | 0.6421259811647104 | 0.1564062232934305 |
| 0.7680304494315209 | 0.6386926226443066 | 0.3532088152358810 |
| 0.6977195176555426 | 0.8326257011783227 | 0.8360468366976690 |
| 0.3548260384184232 | 0.5523752270526074 | 0.7056157792687827 |
| 0.3933724589209007 | 0.6964000364607799 | 0.7359158373932502 |
| 0.4248173346432438 | 0.5778319469759765 | 0.2875961564245628 |
| 0.4509883836816257 | 0.7392547081780307 | 0.3741108392369057 |
| 0.3126919237440831 | 0.6381880311982258 | 0.4020875973582747 |
| 0.4231729117583640 | 0.7785549692905178 | 0.9619015581085577 |
| 0.2660549704176205 | 0.6595441489586946 | 0.0384090130551371 |
| 0.3693703699296478 | 0.6117157410915155 | 0.0671032913875820 |
| 0.2287635320678660 | 0.5887921394714724 | 0.6222394018157615 |
| 0.6018588268647775 | 0.2962759935158914 | 0.2746353803045523 |
| 0.7481918891291670 | 0.3365145022450520 | 0.2429900368575062 |
| 0.6283930247592835 | 0.3664521362121178 | 0.6924863732838276 |
| 0.7121497580659337 | 0.2104436567002850 | 0.9412733605741792 |
| 0.6630358093878357 | 0.3120398453516557 | 0.9133102103126163 |
| 0.6407877102557933 | 0.1729269930109893 | 0.3575285787542626 |
| 0.7910846497087292 | 0.3933288061423141 | 0.6048079885961002 |
| 0.6899847043089267 | 0.2561818573472721 | 0.5774836372507650 |
| 0.8315812300955088 | 0.3658746242266915 | 0.0179549709448636 |
| 0.7559249472207341 | 0.7631601978644440 | 0.6189023569470677 |
| 0.6982321353519438 | 0.6047070907592627 | 0.3886559856321483 |
| 0.8089196693749301 | 0.6928875884520593 | 0.4428023711234488 |
| 0.6659756295506583 | 0.6554275820400193 | 0.6845289460069637 |
| 0.5251686616030824 | 0.6732870733575211 | 0.6130001071000635 |
| 0.7240590503570914 | 0.4668885777157357 | 0.3723895096056751 |
| 0.6635574667319943 | 0.7550047458898277 | 0.8041419844049855 |
| 0.7911206354258979 | 0.6093615710492202 | 0.2139110801388995 |

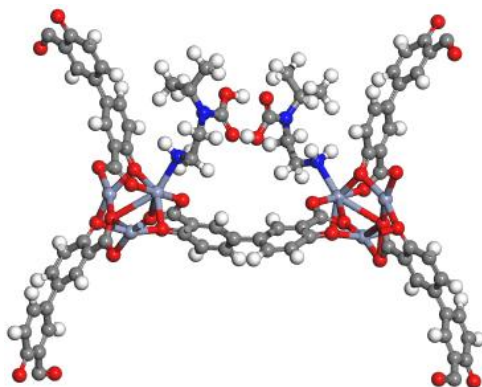

pair-CO<sub>2</sub>-i-2-Cr<sub>2</sub>(dobpdc)

1.0000000000000000

21.5512840310368290 -0.3939275428560167 0.0063875134064300

-9.7432691366981619 19.4766628808246800 -0.0356576453747086

0.0016455433804987 -0.0099027934297048 5.8637308245361650

Cr H C O N

6 46 54 22 4

Direct

|                    |                    |                    |
|--------------------|--------------------|--------------------|
| 0.6290794429790907 | 0.2333801944315823 | 0.0726069566393122 |
| 0.7533246475934803 | 0.2934246579905704 | 0.7339118585010453 |
| 0.6879437708065765 | 0.3666215688030405 | 0.3873135579277616 |
| 0.2899141518262098 | 0.5778328772415335 | 0.9060526994701448 |
| 0.3495472947885219 | 0.7004269677292214 | 0.2450432512259511 |
| 0.4250299712319574 | 0.6363058488825288 | 0.5929492877595948 |
| 0.5334875064665852 | 0.4036947656052376 | 0.7250025118264674 |
| 0.7069928077198782 | 0.1031731573828694 | 0.1373751030608830 |
| 0.6474939881874064 | 0.9798475056662426 | 0.0107368558007650 |
| 0.5767859236319879 | 0.0385289134451909 | 0.4020357980177707 |
| 0.9930367695628135 | 0.5709574135616649 | 0.6573293507142282 |
| 0.8715075116623296 | 0.4985938683200217 | 0.7986380767045631 |
| 0.9456684271382017 | 0.4451659361252567 | 0.0510939432976940 |
| 0.4093629819083020 | 0.3357746316350543 | 0.3357831431765561 |
| 0.4801730349574242 | 0.2789818991048421 | 0.4665473468114598 |
| 0.4594737969331533 | 0.4805206165540667 | 0.2556295184402302 |
| 0.0321633711447049 | 0.5934669710841334 | 0.9669596466106185 |
| 0.1566805097678028 | 0.6533254364818433 | 0.8412194379878670 |
| 0.6246761483047862 | 0.9414800898470403 | 0.3179039584646333 |
| 0.0929308315166821 | 0.5245679021855736 | 0.5749147853552898 |
| 0.5541475318560956 | 0.8205061145294223 | 0.1769800275644897 |
| 0.3337814379795887 | 0.4300205360131670 | 0.5119134173751974 |
| 0.3882757764041926 | 0.3574489175144677 | 0.6439407571989477 |
| 0.4991988900039246 | 0.8918375383517301 | 0.9267648164965010 |
| 0.7866328998896179 | 0.4871315915711918 | 0.1768986233219039 |
| 0.5751044478797382 | 0.6881478104918912 | 0.5873676539458330 |
| 0.5177346179565347 | 0.6638017108914553 | 0.0522577079915578 |
| 0.5548202936943696 | 0.6181926835263454 | 0.9020572669829576 |

|                    |                    |                    |
|--------------------|--------------------|--------------------|
| 0.6813749986845963 | 0.4669050830843062 | 0.9556111025472731 |
| 0.6599923623379880 | 0.5060110753962874 | 0.1866890329773980 |
| 0.6451451440434752 | 0.6841763609845088 | 0.1482087499802773 |
| 0.6218104651214418 | 0.7521862023437293 | 0.1672476855307536 |
| 0.7111575870452072 | 0.5919993464880093 | 0.8944583316714514 |
| 0.7782235151301933 | 0.5686869012298530 | 0.8368680789384726 |
| 0.7860909350350695 | 0.7470385174798864 | 0.5320959130551230 |
| 0.8769057118605446 | 0.6346122987966325 | 0.9114658948583170 |
| 0.6962027800783517 | 0.6433902714468331 | 0.4808757918146895 |
| 0.6948024757702669 | 0.8453347005524279 | 0.0930445293687754 |
| 0.7582411418365496 | 0.5158608842612864 | 0.3894399024347592 |
| 0.5557050747073475 | 0.7438599309128406 | 0.7174454513800939 |
| 0.6547093176551257 | 0.8596807627394369 | 0.7149926922598056 |
| 0.7334766807675379 | 0.8693763224368638 | 0.5847885015547902 |
| 0.7351152693137806 | 0.9335326282646861 | 0.7783668328933260 |
| 0.8180311919510785 | 0.9216511047044236 | 0.0797662790050921 |
| 0.8332438767923946 | 0.8702257500170276 | 0.8722629989206823 |
| 0.8051440476092964 | 0.8374383154529070 | 0.1527836679082739 |
| 0.9079109493921749 | 0.6704241193533562 | 0.4198586239129369 |
| 0.9697605437571397 | 0.6705563680198452 | 0.2171336782499509 |
| 0.8941456586525476 | 0.5920817130066567 | 0.2811167116493039 |
| 0.9097936406604106 | 0.7721294614872747 | 0.1468940717975329 |
| 0.8759042946147986 | 0.7471517936552416 | 0.8644241171832618 |
| 0.9598256529575053 | 0.7561346998529430 | 0.9346782800267093 |
| 0.9136707942480768 | 0.6479833158361430 | 0.2571224261524208 |
| 0.9066631876118691 | 0.7395598469040650 | 0.0002927462062985 |
| 0.7997847935052746 | 0.8686476566058019 | 0.0148786088386643 |
| 0.7108082662600310 | 0.8775602100536233 | 0.7437454144193794 |
| 0.6737300937990227 | 0.1401455583791176 | 0.8443438276114961 |
| 0.5599214461178690 | 0.3430364095271585 | 0.9556540012448451 |
| 0.5201998259282021 | 0.3759413337890223 | 0.8866240841202000 |
| 0.4667918435027616 | 0.3749274520059629 | 0.0239278021193456 |
| 0.6444495897177802 | 0.0195576473921832 | 0.9053833512724339 |
| 0.6776236530562016 | 0.0882313064875007 | 0.9779440852387680 |
| 0.6121483443775020 | 0.3421144219605168 | 0.7940198595837344 |
| 0.8404095621223036 | 0.4295651224804828 | 0.5080567462751659 |
| 0.6400135179464499 | 0.1214552632700858 | 0.6293083515348457 |
| 0.6054706519075950 | 0.0513939720704855 | 0.5628358334210475 |
| 0.6064671999518580 | 0.9996813626832832 | 0.7006107138690680 |
| 0.9560340016975033 | 0.5272810773677321 | 0.5556510203782210 |
| 0.8885005382816971 | 0.4869488426434572 | 0.6361600386178878 |
| 0.6425811699019732 | 0.1735226303600754 | 0.4631304081406071 |
| 0.5484125733833878 | 0.3113327773319199 | 0.1733258602453560 |
| 0.8610563685334824 | 0.4177048157763465 | 0.2887554515661108 |
| 0.9303590345380925 | 0.4584535261389675 | 0.2137666577145581 |
| 0.9786316926328382 | 0.5131918052606181 | 0.3467227813853242 |



|                    |                    |                    |
|--------------------|--------------------|--------------------|
| 0.4523590850144501 | 0.3385748325561551 | 0.2306925898584566 |
| 0.4918404593475358 | 0.3071114682632228 | 0.3057515621918725 |
| 0.8105610339987450 | 0.3658327849884486 | 0.1277212543514494 |
| 0.1947447264264568 | 0.6209414625965550 | 0.1338163561406205 |
| 0.3997806355343272 | 0.5085197139291751 | 0.0238889161480387 |
| 0.4315213455272442 | 0.4678776219632894 | 0.0934317220628103 |
| 0.4288952228736207 | 0.4141745802925314 | 0.9562298487295706 |
| 0.0725961545068898 | 0.5909508437062101 | 0.0724245689535437 |
| 0.1419286731708169 | 0.6242965065419526 | 0.0003110745969366 |
| 0.3993788239582372 | 0.5603720246354840 | 0.1865245091110950 |
| 0.4856788533874195 | 0.7880221987910758 | 0.4697293861969101 |
| 0.1763038773051235 | 0.5876536691704075 | 0.3485198713260615 |
| 0.1056028741029209 | 0.5529614101752358 | 0.4145392281913800 |
| 0.0530084120310477 | 0.5533800619374247 | 0.2767039113256473 |
| 0.5815458819355328 | 0.9040715996809325 | 0.4204456395278200 |
| 0.5423620507634510 | 0.8368008791276580 | 0.3403917252148645 |
| 0.2291684360751134 | 0.5906426599998440 | 0.5149489681893229 |
| 0.3678504616008595 | 0.4976569096875778 | 0.8056813350140217 |
| 0.4735226224939169 | 0.8081063238626669 | 0.6895401168081250 |
| 0.5129447430472212 | 0.8771817349039708 | 0.7637473583092387 |
| 0.5669904468038993 | 0.9259111573550811 | 0.6300025166712899 |
| 0.3923104227703860 | 0.4005929908369623 | 0.7488670425246369 |
| 0.3621616165390620 | 0.4410521946399513 | 0.6730999034842426 |
| 0.4225457681173523 | 0.7574561048223529 | 0.8514419877717501 |
| 0.5588267455788909 | 0.6696335885004387 | 0.9304199147403693 |
| 0.7036738266039890 | 0.5055288849722714 | 0.0925722948849454 |
| 0.6296408701190259 | 0.7174632195682875 | 0.0480199487692801 |
| 0.7472584996154836 | 0.5756252548504222 | 0.9741743471467501 |
| 0.7103587600630021 | 0.7333325926058976 | 0.7390138463735170 |
| 0.8743847106915084 | 0.6628396594293235 | 0.0656518680696934 |
| 0.7760293380030348 | 0.6577492025771718 | 0.2928552963456497 |
| 0.7228326427038425 | 0.8392624918966547 | 0.9433706788294316 |
| 0.3439464711423383 | 0.5402363612547560 | 0.7205058676875424 |
| 0.4058272965798366 | 0.6924415975522322 | 0.8395681743445209 |
| 0.4445705497533439 | 0.5810588307361755 | 0.3478507539806159 |
| 0.4460168452326059 | 0.7241452001071735 | 0.3854756098217678 |
| 0.2934307622866328 | 0.6381192279523873 | 0.5064118034874667 |
| 0.3985717629963830 | 0.7796369940854220 | 0.0127881961805372 |
| 0.2610730712235068 | 0.6487944716633436 | 0.0535512482343776 |
| 0.3537493418509570 | 0.5827764557863020 | 0.1719767003389592 |
| 0.2089990152354275 | 0.5470981331285572 | 0.6783026061190682 |
| 0.5905836204999275 | 0.2866315451137780 | 0.2584706598173199 |
| 0.7444554167053568 | 0.3474812113065866 | 0.1402977457909955 |
| 0.6339562890457628 | 0.3874231762664593 | 0.6348999904727393 |
| 0.7014777215663770 | 0.2058365343528905 | 0.9248718013176855 |
| 0.6338101691225688 | 0.2962236930855866 | 0.8069383938151091 |

|                    |                    |                    |
|--------------------|--------------------|--------------------|
| 0.5985648101355352 | 0.1532729578622067 | 0.2992023496051530 |
| 0.7764317739137567 | 0.3887832533185716 | 0.5933101554121265 |
| 0.6902452931953036 | 0.2372623741065212 | 0.4724704331774348 |
| 0.8336431663582218 | 0.3428693012216897 | 0.9660745205084140 |
| 0.7664195359752810 | 0.7760804368632677 | 0.6208318069880150 |
| 0.7068758343701518 | 0.6252579513924630 | 0.3292237383700751 |
| 0.8174308874258998 | 0.7082123425156936 | 0.4138250615912966 |
| 0.6785620581641965 | 0.6685500370145760 | 0.7033438277838471 |
| 0.5437875219901898 | 0.6925746028857347 | 0.7110728581601080 |
| 0.7419668547947325 | 0.4831004736751296 | 0.2517619274060223 |
| 0.6881211013828974 | 0.7630499793299563 | 0.9011568110352215 |
| 0.7981042897538160 | 0.6322171742989440 | 0.1175829421493688 |

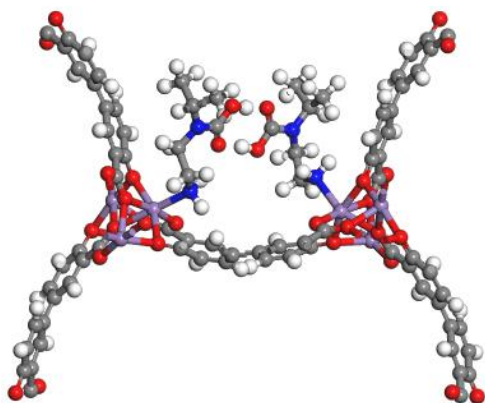

pair-CO<sub>2</sub>-i-2-Mn<sub>2</sub>(dobpdc)

1.000000000000000

|                     |                     |                     |
|---------------------|---------------------|---------------------|
| 20.9482339638025223 | 0.1915572334077865  | 0.0729123264435186  |
| -9.4958218787606103 | 18.7117178676139808 | -0.0443838094420470 |
| 0.0029063583380224  | 0.0074563860693715  | 7.0215530095222531  |

| Mn | H  | C  | O  | N |
|----|----|----|----|---|
| 6  | 46 | 54 | 22 | 4 |

Direct

|                    |                    |                    |
|--------------------|--------------------|--------------------|
| 0.6570339982561606 | 0.2438217474825279 | 0.1408841846764375 |
| 0.7560091210136832 | 0.3148237334724371 | 0.7983254409093874 |
| 0.6821480663478852 | 0.3573629184626483 | 0.4578105219077031 |
| 0.2977113090540726 | 0.6072166621999671 | 0.8574426560316581 |
| 0.3716121355138426 | 0.7045245086466068 | 0.2016166133927797 |
| 0.4124742289876693 | 0.6281195853148276 | 0.5427344416620485 |
| 0.5212866666935412 | 0.3824474539438256 | 0.7698587666723284 |
| 0.6943651799982575 | 0.1011142976781940 | 0.1131167302139531 |
| 0.6375087487112623 | 0.9771786145902368 | 0.9917257788680800 |
| 0.6074034776437784 | 0.0546995630479898 | 0.4486330767005668 |
| 0.0129423100997172 | 0.5631923371299479 | 0.6434578702930196 |
| 0.8928966170875015 | 0.4877656544082285 | 0.7763046922783303 |
| 0.9428245180150014 | 0.4658191885421701 | 0.0944892668242900 |
| 0.4191852452868048 | 0.3559115743951935 | 0.3172913114389715 |
| 0.4982124581434206 | 0.3064473237215353 | 0.4452327380896506 |
| 0.4361333643687644 | 0.4701068790395411 | 0.2208711574646429 |

|                    |                    |                    |
|--------------------|--------------------|--------------------|
| 0.0318589885251654 | 0.5823005949580775 | 0.0016401010943881 |
| 0.1562146700374427 | 0.6435091720691304 | 0.8834408717640514 |
| 0.6270681160928859 | 0.9556615692331789 | 0.3561470638935589 |
| 0.1098022988261533 | 0.5525986587589955 | 0.5444602916908536 |
| 0.5520206274016246 | 0.8352030917402260 | 0.2262187386453718 |
| 0.3506422324422829 | 0.4413145255762174 | 0.5550039118006183 |
| 0.4035159844864182 | 0.3645212170140226 | 0.6783530005758251 |
| 0.5181463075195225 | 0.8906280872969887 | 0.8946117497767716 |
| 0.7763228691848809 | 0.4874640785040825 | 0.3434002941878092 |
| 0.4880319446844510 | 0.5653895380435188 | 0.6915411725714833 |
| 0.4997525921018351 | 0.6566422488824060 | 0.9349788616039447 |
| 0.5728681701584009 | 0.6359024506666913 | 0.9147661043184527 |
| 0.6852711298563818 | 0.4430582710014903 | 0.0747317575110458 |
| 0.6456641464439130 | 0.4888248078321240 | 0.2024420805695684 |
| 0.5819745612480673 | 0.7723758899752511 | 0.8914680921102232 |
| 0.5790752667068162 | 0.7500268154835013 | 0.6491756692946211 |
| 0.7166627685155689 | 0.5747429424259494 | 0.9787398247492973 |
| 0.7822700485733662 | 0.5432650152543630 | 0.9717565784799973 |
| 0.7829211035457035 | 0.7343408049222617 | 0.5550064662948344 |
| 0.8796934097403053 | 0.6024503618606687 | 0.0609016983258073 |
| 0.6717807508627160 | 0.8193516654324924 | 0.0322397761774269 |
| 0.6853373907214007 | 0.6482296546342710 | 0.4115421373931838 |
| 0.7172649444489920 | 0.5033894891172963 | 0.4583212264629992 |
| 0.5488511537153258 | 0.6300182512812924 | 0.5663040761883451 |
| 0.8051760067596376 | 0.7961739752396539 | 0.9852498397270324 |
| 0.7298761782797953 | 0.7446092544772469 | 0.1312616920978371 |
| 0.7817774210489432 | 0.8363895443860017 | 0.1791767587247506 |
| 0.7919892083140141 | 0.8864792026411195 | 0.7382456459930111 |
| 0.7781512485963162 | 0.9298353042396315 | 0.9410179572445116 |
| 0.7141131340146174 | 0.9006417934191973 | 0.7549590003959565 |
| 0.9214305918280914 | 0.6925968637647557 | 0.4235650665269688 |
| 0.9732781995912774 | 0.6600365947516593 | 0.2895758936092818 |
| 0.8963443554130848 | 0.5995363322312883 | 0.4126529183385159 |
| 0.9014397873192479 | 0.7553881905535746 | 0.1251673551310049 |
| 0.8723174329021646 | 0.7067136837065107 | 0.9082007343765568 |
| 0.9592519024518680 | 0.7291547233100459 | 0.9963933616921992 |
| 0.9188270631487185 | 0.6493840493650822 | 0.3310792735242813 |
| 0.9035504394686740 | 0.7128756679870634 | 0.0381689175552893 |
| 0.7603714770878867 | 0.7968295866722315 | 0.0646139160038004 |
| 0.7514165777280795 | 0.8874189702817503 | 0.8360490471144644 |
| 0.6830499386692992 | 0.1484603697014109 | 0.8516581824740825 |
| 0.5590100484235592 | 0.3364191738993298 | 0.9861086186331889 |
| 0.5137449011035926 | 0.3643780090048097 | 0.9174620154851922 |
| 0.4641787113058626 | 0.3734180297920915 | 0.0327405296217833 |
| 0.6429471699784912 | 0.0209048757566208 | 0.8981885157338425 |
| 0.6750711684934529 | 0.0900119152798808 | 0.9668554639053539 |

|                    |                    |                    |
|--------------------|--------------------|--------------------|
| 0.6142350833656565 | 0.3370249196398021 | 0.8524870853375646 |
| 0.8489817302472105 | 0.4344777789177172 | 0.5124207558328067 |
| 0.6593971286670879 | 0.1343102322107228 | 0.6589821484130880 |
| 0.6273863872241918 | 0.0636136072124316 | 0.5941480586111183 |
| 0.6176074528509545 | 0.0060774636520549 | 0.7096541754997290 |
| 0.9715913734965156 | 0.5252923075092255 | 0.5512904226650690 |
| 0.9046216409383803 | 0.4840401319692305 | 0.6261136682049724 |
| 0.6629575177721918 | 0.1891257618649220 | 0.5197122825199756 |
| 0.5549250955217460 | 0.3165334793711025 | 0.1823261124959785 |
| 0.8638836304451232 | 0.4300406632618348 | 0.3145961702089863 |
| 0.9328064943433958 | 0.4730058277831120 | 0.2436585028508844 |
| 0.9875945265073227 | 0.5204686097701554 | 0.3576507575590142 |
| 0.4587253698472722 | 0.3510535841206064 | 0.2242959198900962 |
| 0.5023678260351403 | 0.3231568661814634 | 0.2966555769226957 |
| 0.8117277919785053 | 0.3787263869697810 | 0.1791054984741223 |
| 0.2039979541607266 | 0.6328188275867959 | 0.1450074269182551 |
| 0.3865806785305423 | 0.5055631984831805 | 0.0092448551191708 |
| 0.4161653173927604 | 0.4613907629012886 | 0.0752637964488301 |
| 0.4245395074674221 | 0.4114894034115935 | 0.9602896919011314 |
| 0.0756458250098504 | 0.5885118731674837 | 0.0959227694447549 |
| 0.1451302535970953 | 0.6232762261832718 | 0.0290234779508580 |
| 0.3873800658511684 | 0.5602017578333545 | 0.1448578113999730 |
| 0.4925997904780033 | 0.7940218925201279 | 0.4847225383497999 |
| 0.1894794300983307 | 0.6082492755657398 | 0.3369777607837321 |
| 0.1184743512421420 | 0.5732137963451436 | 0.3994754956585354 |
| 0.0606177025807213 | 0.5616444988142248 | 0.2833478723358738 |
| 0.5867681567949958 | 0.9153645643858042 | 0.4465620546099345 |
| 0.5453900710742872 | 0.8482060058464853 | 0.3733441448297654 |
| 0.2442602826890834 | 0.6141529727065134 | 0.4790227678133760 |
| 0.3637150691147539 | 0.4999048634540202 | 0.8153929182813897 |
| 0.4848881757588615 | 0.8105562460817097 | 0.6789375458793998 |
| 0.5275244472371554 | 0.8794493855142917 | 0.7481520096692194 |
| 0.5781860623044182 | 0.9328827362690930 | 0.6360789081441212 |
| 0.3993797196377784 | 0.4043035490790103 | 0.7714331622946062 |
| 0.3694719432022637 | 0.4466992001999301 | 0.7016463538355779 |
| 0.4342150788608734 | 0.7587611557029419 | 0.8162337094760659 |
| 0.5424149242769261 | 0.6593434295061016 | 0.8390158150656077 |
| 0.6964375147509401 | 0.4876299443205667 | 0.1722744037099133 |
| 0.5920328969059341 | 0.7376413769440262 | 0.7918826909849557 |
| 0.7483449688714998 | 0.5563300165122698 | 0.0679184339224363 |
| 0.6968330817862238 | 0.7327142937857687 | 0.6649842654337661 |
| 0.8754292712328038 | 0.6432497961942190 | 0.1515982894136627 |
| 0.7718768456901159 | 0.6483383896716646 | 0.3094332352710580 |
| 0.7121020802029889 | 0.8157825654912685 | 0.9377690660495261 |
| 0.3403440388231473 | 0.5430285112577735 | 0.7338218159980556 |
| 0.3959196281395165 | 0.6940320579662611 | 0.7620210485238985 |

|                    |                    |                    |
|--------------------|--------------------|--------------------|
| 0.4113956177635458 | 0.5624501313642014 | 0.3117020530816816 |
| 0.4539406896054743 | 0.7305583868775543 | 0.4035891415365853 |
| 0.3106116786296482 | 0.6395604560817034 | 0.4331804993477846 |
| 0.4304643900170078 | 0.7784151480816561 | 0.9861924578333401 |
| 0.2697545169197397 | 0.6637380453262978 | 0.0685087032905898 |
| 0.3652887634623454 | 0.6056350284611725 | 0.0890815564590710 |
| 0.2232574207635238 | 0.5931753419599275 | 0.6486643904309588 |
| 0.5988027170916794 | 0.2939221646299472 | 0.2641639405299330 |
| 0.7478347271787271 | 0.3383548005016621 | 0.2370406746193154 |
| 0.6191179241481066 | 0.3634209377131015 | 0.6869737954385613 |
| 0.7119091893941487 | 0.2137735324499701 | 0.9300160697551831 |
| 0.6579268004504755 | 0.3126506540320548 | 0.9083847121290276 |
| 0.6407492240507224 | 0.1688450807165012 | 0.3507132551761813 |
| 0.7857783266797114 | 0.3953451168183406 | 0.5943313425761403 |
| 0.6878078082474630 | 0.2550387862946621 | 0.5680753252795157 |
| 0.8309586704147804 | 0.3759923307638147 | 0.0080266402309093 |
| 0.7671446782509364 | 0.7578162146258336 | 0.6639978772528750 |
| 0.7006296939284695 | 0.6187258573386032 | 0.3196731820082164 |
| 0.8115607592531688 | 0.7024257288002147 | 0.4034649227004721 |
| 0.6570682961968828 | 0.6871421845018375 | 0.5450671095193798 |
| 0.5085754240188152 | 0.6188343270275993 | 0.6638759741136084 |
| 0.7226166679982811 | 0.4723369949717409 | 0.3529923176630447 |
| 0.6687018522049399 | 0.7581461107849208 | 0.8021578355655734 |
| 0.7974080133397337 | 0.6142789802392343 | 0.1892153616454593 |

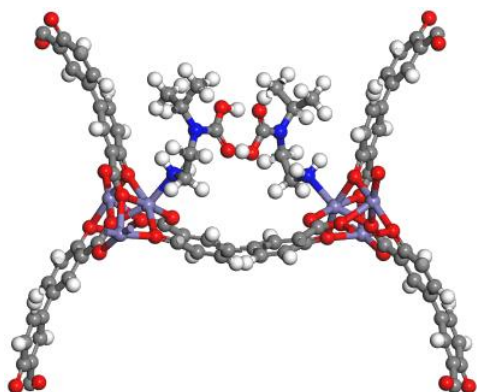

pair-CO<sub>2</sub>-i-2-Fe<sub>2</sub>(dobpdc)

1.0000000000000000

|                     |                     |                     |
|---------------------|---------------------|---------------------|
| 20.8805123273607656 | -0.1769357678551777 | -0.0337388899624504 |
| -9.2527991979582254 | 18.8981455349606442 | 0.0326929562120815  |
| -0.0106199662834098 | 0.0067964611278880  | 6.8357652844828607  |

Fe H C O N

6 46 54 22 4

Direct

|                    |                    |                    |
|--------------------|--------------------|--------------------|
| 0.6611031175554334 | 0.2504307921892425 | 0.1258268672580370 |
| 0.7576536020012932 | 0.3169631676564633 | 0.7871996081351473 |
| 0.6874205693617222 | 0.3586276568878333 | 0.4470519807125800 |
| 0.3063846586916700 | 0.6089684099775593 | 0.8481336091681030 |

|                    |                    |                    |
|--------------------|--------------------|--------------------|
| 0.3728390138206825 | 0.7048243053199049 | 0.1862290364255435 |
| 0.4159815225884624 | 0.6359401866653580 | 0.5263352472900702 |
| 0.5232375541263277 | 0.3843808682668490 | 0.7527641824035035 |
| 0.6997271399536258 | 0.1061795855315082 | 0.1123256614336949 |
| 0.6411346655622159 | 0.9824030424701196 | 0.9884359120641119 |
| 0.6094676060849652 | 0.0598258446400708 | 0.4306244367778694 |
| 0.0153829173922198 | 0.5709235048200783 | 0.6378126330409877 |
| 0.8944837370934510 | 0.4959402061259900 | 0.7731391300204739 |
| 0.9470811394807501 | 0.4672380438923222 | 0.0805815298705934 |
| 0.4209173619263211 | 0.3539426441380893 | 0.3147765895992105 |
| 0.5000486564650719 | 0.3035131926934883 | 0.4426130372453663 |
| 0.4389332461045261 | 0.4701604478074193 | 0.2238181200410825 |
| 0.0354371044260097 | 0.5858799451072561 | 0.9846659381236867 |
| 0.1601709625565476 | 0.6456194280589118 | 0.8612906481912870 |
| 0.6261859848527040 | 0.9627404630685280 | 0.3345639013681048 |
| 0.1141806659959741 | 0.5554940183939601 | 0.5424593642055305 |
| 0.5519555405612295 | 0.8424595188539478 | 0.1992723513224482 |
| 0.3601008100293897 | 0.4498177469495362 | 0.5317050045397732 |
| 0.4079553613859953 | 0.3690395361491824 | 0.6610387884800465 |
| 0.5227193643863390 | 0.8935244619349287 | 0.8924493304355199 |
| 0.7747842581134362 | 0.4884604143363058 | 0.3220077889038896 |
| 0.5585489403197580 | 0.6590291400766805 | 0.5441677540908305 |
| 0.4881887909395796 | 0.6407761535757024 | 0.9210004425504790 |
| 0.5339560875088263 | 0.5950306380275099 | 0.8225238970815600 |
| 0.6767003724981695 | 0.4410161091403449 | 0.0655281801012633 |
| 0.6350870764893977 | 0.4796297024484621 | 0.2152463069611819 |
| 0.6143434395056434 | 0.6644183915397226 | 0.0613881179308034 |
| 0.5866912560015261 | 0.7324478814508829 | 0.0461469515174053 |
| 0.6930038477714866 | 0.5705068081071901 | 0.9859339719119615 |
| 0.7617833282745334 | 0.5452797173810533 | 0.9434699150760900 |
| 0.7753589345805962 | 0.7309362526048981 | 0.5539347292037082 |
| 0.8606170699398801 | 0.6145013254641721 | 0.9884169816574510 |
| 0.6822178305360493 | 0.6248641391443107 | 0.4985117209520805 |
| 0.6624989415049771 | 0.8272303740035845 | 0.0009024141857793 |
| 0.7168702613728678 | 0.4997780514154166 | 0.4587459072568122 |
| 0.5478709651983855 | 0.7253137846017618 | 0.6346473386465616 |
| 0.6586384741072721 | 0.8534163435788572 | 0.6470294241348552 |
| 0.7498745541912920 | 0.8701202054637607 | 0.6223346089357639 |
| 0.7265677097944598 | 0.9247254462306498 | 0.7758920045928764 |
| 0.7897298211136518 | 0.8971443200267485 | 0.0724318219031642 |
| 0.8128626145206709 | 0.8417581664472620 | 0.9218452966365414 |
| 0.7628604208454369 | 0.8072059350119268 | 0.1408132400580617 |
| 0.9127323067690201 | 0.6803771068686112 | 0.3924528341361745 |
| 0.9646345190220807 | 0.6658379919512326 | 0.2074487340464536 |
| 0.8940642193360711 | 0.5922809975685785 | 0.3214934096443944 |
| 0.8834101939208484 | 0.7600367802441369 | 0.1399412285904275 |

|                    |                    |                    |
|--------------------|--------------------|--------------------|
| 0.8448846675192936 | 0.7220768510762704 | 0.9094267708754989 |
| 0.9355781592857938 | 0.7430200986165411 | 0.9610923205285096 |
| 0.9104558119753073 | 0.6466346210494799 | 0.2680219629980824 |
| 0.8818594183001569 | 0.7230348450209778 | 0.0253224951474145 |
| 0.7709102541139774 | 0.8428958222426206 | 0.0157046205537381 |
| 0.7096298735087494 | 0.8700222806376470 | 0.7251878568287602 |
| 0.6876928742234095 | 0.1535112712776932 | 0.8437368314999262 |
| 0.5600694750967823 | 0.3357330397581668 | 0.9710180987478526 |
| 0.5154105773332451 | 0.3650023740670344 | 0.9031698141330000 |
| 0.4665042535580168 | 0.3740555241276784 | 0.0237819166936634 |
| 0.6464044377368195 | 0.0260927828841924 | 0.8924182892559162 |
| 0.6796363929642394 | 0.0951104631875239 | 0.9625483263334532 |
| 0.6148237016504332 | 0.3361788116962072 | 0.8334466359767221 |
| 0.8516182309027097 | 0.4391074053781705 | 0.5055962273896406 |
| 0.6637038981736472 | 0.1391229290748879 | 0.6457720014005115 |
| 0.6299860443889269 | 0.0685178638710614 | 0.5799966206933199 |
| 0.6197242594638516 | 0.0110613179839527 | 0.6994482295674753 |
| 0.9742356780221847 | 0.5315730889984874 | 0.5447015197604215 |
| 0.9068302869784485 | 0.4905062993943535 | 0.6208460965017518 |
| 0.6694782097492380 | 0.1943671263786555 | 0.5028264239389275 |
| 0.5568493598403013 | 0.3157616575571096 | 0.1724111656269898 |
| 0.8671066873448461 | 0.4334792670314077 | 0.3037624881356739 |
| 0.9365662872089585 | 0.4757043264241851 | 0.2320721843460137 |
| 0.9911076782535853 | 0.5245081011905179 | 0.3485679244660652 |
| 0.4605204611008010 | 0.3497031129140485 | 0.2187148326513954 |
| 0.5040091516732468 | 0.3210825943763490 | 0.2908603973659970 |
| 0.8143730617958927 | 0.3824688778413900 | 0.1651535961230442 |
| 0.2082410578623347 | 0.6342896147339970 | 0.1298791121556617 |
| 0.3918948743194404 | 0.5084425953374120 | 0.0042819805762254 |
| 0.4199432094964260 | 0.4629971683025428 | 0.0728931696699847 |
| 0.4280766203969459 | 0.4138384174889872 | 0.9524974132524815 |
| 0.0796272415323436 | 0.5916625514147767 | 0.0807572239566975 |
| 0.1491844832343314 | 0.6255363963518986 | 0.0109456137435960 |
| 0.3925528299227533 | 0.5628809269750881 | 0.1416688974581151 |
| 0.4954576090092745 | 0.7990754260689940 | 0.4673217962854078 |
| 0.1939288675840150 | 0.6102908901192717 | 0.3276951024560564 |
| 0.1227735997965402 | 0.5759279648093768 | 0.3931819505697316 |
| 0.0646985789307492 | 0.5649994416186903 | 0.2735608428000908 |
| 0.5871186199169597 | 0.9215017467004722 | 0.4279346544106037 |
| 0.5465690029141602 | 0.8544003415752701 | 0.3519237613090729 |
| 0.2498020896988744 | 0.6167285067019155 | 0.4707649140383263 |
| 0.3725642589836687 | 0.5059324071686621 | 0.8023617638564204 |
| 0.4896556599245107 | 0.8142357152337668 | 0.6692478901134373 |
| 0.5313877413387000 | 0.8833444165600340 | 0.7408455723600861 |
| 0.5798357094797310 | 0.9379548849348176 | 0.6242355437371637 |
| 0.4043790728294500 | 0.4087521241315183 | 0.7568891084534403 |

|                    |                    |                    |
|--------------------|--------------------|--------------------|
| 0.3772193780384371 | 0.4531649333953410 | 0.6838798323359794 |
| 0.4387889675590978 | 0.7615477494523862 | 0.8081933341369886 |
| 0.5353726218163255 | 0.6474007551027763 | 0.8369069032990722 |
| 0.6871372254334882 | 0.4839278995183979 | 0.1700364660578386 |
| 0.6014711892689456 | 0.6974855303668360 | 0.9582193133373678 |
| 0.7307709421619434 | 0.5547197991295206 | 0.0592452740542034 |
| 0.6953221422439615 | 0.7150307702664767 | 0.7259670988153841 |
| 0.8595392271104335 | 0.6485217011376617 | 0.1092088857280540 |
| 0.7619509997018032 | 0.6414863017442591 | 0.3250968094786300 |
| 0.7010624644907890 | 0.8218090059204541 | 0.9012319719560686 |
| 0.3525682145690621 | 0.5518670144453156 | 0.7187352123977931 |
| 0.4007416235616925 | 0.6973431567988042 | 0.7495366952405236 |
| 0.4199575889568033 | 0.5686763979761782 | 0.3110743328831876 |
| 0.4563834558131248 | 0.7359062621375422 | 0.3834260354471340 |
| 0.3160487120460742 | 0.6441869817690316 | 0.4199313527531786 |
| 0.4340278773478560 | 0.7800478030751414 | 0.9829690372372691 |
| 0.2741266628667792 | 0.6641840845375129 | 0.0508609466991784 |
| 0.3670837554120115 | 0.6057792181799339 | 0.0841760384765344 |
| 0.2307960932265069 | 0.5946060825475112 | 0.6455069699189754 |
| 0.6023357288438131 | 0.2948094287072810 | 0.2558983941648802 |
| 0.7496302156334557 | 0.3446391441552278 | 0.2235933055979517 |
| 0.6201498499724314 | 0.3628235845809459 | 0.6634582976115133 |
| 0.7169506621559287 | 0.2188437609508680 | 0.9228341525000251 |
| 0.6582930256500825 | 0.3113281970269262 | 0.8912436182304103 |
| 0.6474258107960926 | 0.1754000978796856 | 0.3279842430997452 |
| 0.7881497428458281 | 0.3995622457915676 | 0.5894512020779736 |
| 0.6963301769758600 | 0.2600431203383657 | 0.5540064149114418 |
| 0.8332827249325346 | 0.3773483887809688 | 0.9909899451574647 |
| 0.7570534228113311 | 0.7591278680711353 | 0.6452569964111406 |
| 0.6919922018075407 | 0.6063216431436839 | 0.3664956154550048 |
| 0.8044454194929226 | 0.6952084671152604 | 0.4196664283312242 |
| 0.6646095570161317 | 0.6488999766568471 | 0.6909757455936897 |
| 0.5276648861150501 | 0.6710345629473753 | 0.6386885300263870 |
| 0.7209248289052812 | 0.4704542839535039 | 0.3445828074147105 |
| 0.6656335347673162 | 0.7448636718684338 | 0.8488293908202410 |
| 0.7833399437403490 | 0.6140666629385240 | 0.1742824347411976 |



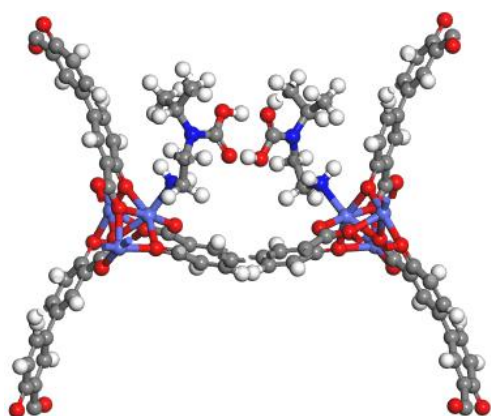

pair-CO<sub>2</sub>-i-2-Co<sub>2</sub>(dobpdc)

1.0000000000000000

20.8421598256933116 -0.0786195220547807 -0.0098795726929092

-9.1460137503161381 18.9482742989901745 0.0135993206183584

-0.0028564159116362 0.0037462009300447 6.8030818921723499

Co H C O N

6 46 54 22 4

Direct

|                    |                    |                    |
|--------------------|--------------------|--------------------|
| 0.6593656580226331 | 0.2487933301277406 | 0.1340741129026631 |
| 0.7546677689088087 | 0.3110969655715980 | 0.7975190008698032 |
| 0.6898156430170287 | 0.3571425995066321 | 0.4519834491426446 |
| 0.3052304980022200 | 0.6075651180904746 | 0.8459902559030260 |
| 0.3675825460260334 | 0.7019751983595687 | 0.1820298541360647 |
| 0.4152789304709011 | 0.6386170493361458 | 0.5268131319434963 |
| 0.5325894447264093 | 0.3917079635445517 | 0.7582024760633109 |
| 0.6880182221294513 | 0.0999105112866122 | 0.1204597358745934 |
| 0.6273427063469074 | 0.9774100206259754 | 0.9912007748105880 |
| 0.5974093156089766 | 0.0593996940424449 | 0.4361009264906007 |
| 0.0150686004154604 | 0.5552857749351124 | 0.6452803842069119 |
| 0.8951351755486855 | 0.4812363899674609 | 0.7846579580609756 |
| 0.9447592754969650 | 0.4538986144355470 | 0.0842067070891333 |
| 0.4274206791604984 | 0.3627478378509068 | 0.3184097235834864 |
| 0.5033165453162370 | 0.3084305693242541 | 0.4494774839198006 |
| 0.4475137224321535 | 0.4800831349711093 | 0.2228313954819266 |
| 0.0304967630321945 | 0.5712611209079256 | 0.9869603772184876 |
| 0.1541334738999077 | 0.6335031022714382 | 0.8585259312173034 |
| 0.6100406654963658 | 0.9626399699924790 | 0.3316812773678400 |
| 0.1140398477868934 | 0.5437403276023344 | 0.5430139806867664 |
| 0.5370337905791742 | 0.8434129282894584 | 0.1927779926665488 |
| 0.3650010353758797 | 0.4535069599114148 | 0.5302319922680654 |
| 0.4163213583414225 | 0.3755240972552014 | 0.6627719846497001 |
| 0.5102709663447532 | 0.8908322098200978 | 0.8949406972703817 |
| 0.7806297808133873 | 0.4817133961271299 | 0.3355199232785540 |
| 0.5523637582850177 | 0.6602474628637803 | 0.5279942279281190 |
| 0.4908268980315097 | 0.6514431781900399 | 0.9154874406165920 |

|                    |                    |                    |
|--------------------|--------------------|--------------------|
| 0.5400858025220263 | 0.6079111127913448 | 0.8210728015695251 |
| 0.6829193914440908 | 0.4417047437865836 | 0.0770825741412601 |
| 0.6441632766751780 | 0.4819191946003720 | 0.2338722017250553 |
| 0.6178465291727059 | 0.6876603878281849 | 0.0510211928057263 |
| 0.5869873939002092 | 0.7524002964735669 | 0.0049915871625564 |
| 0.7060882468596423 | 0.5721763497032002 | 0.0049357513990790 |
| 0.7738879015849831 | 0.5443659063638870 | 0.9691993304049129 |
| 0.7782717018614015 | 0.7351565628408613 | 0.5477520104402087 |
| 0.8726518294834849 | 0.6076657574267148 | 0.0341489344840297 |
| 0.6878436289692345 | 0.6279598968269696 | 0.5089430318389614 |
| 0.6616190908036667 | 0.8446103108271098 | 0.9394670010072795 |
| 0.7239308569957308 | 0.4941232137241728 | 0.4771690222256850 |
| 0.5440611276661702 | 0.7294903359797759 | 0.6075382086243790 |
| 0.6558667585063243 | 0.8576928774615605 | 0.5769663063930488 |
| 0.7474956754705985 | 0.8751227788017718 | 0.5572137532426825 |
| 0.7224267816892652 | 0.9333375290465999 | 0.6917876443345256 |
| 0.7884612524709896 | 0.9169035511527220 | 0.0019168310366509 |
| 0.8121043683922434 | 0.8573704824667565 | 0.8696644896539095 |
| 0.7635332485700482 | 0.8301778475487770 | 0.0944334936586075 |
| 0.9204522798270306 | 0.6814391822098627 | 0.4320333256099793 |
| 0.9729869565560554 | 0.6606922136639728 | 0.2601270416543424 |
| 0.9006914681581371 | 0.5916251502188210 | 0.3807139160616494 |
| 0.8921524418286197 | 0.7551302521451154 | 0.1575778702537967 |
| 0.8579960511672319 | 0.7135199082797965 | 0.9265764826760772 |
| 0.9476473466701271 | 0.7354535215773988 | 0.9940892646721299 |
| 0.9186027911898409 | 0.6445208375013990 | 0.3160050594051103 |
| 0.8929784262644875 | 0.7165109795738088 | 0.0507074213563603 |
| 0.7703716234758741 | 0.8612962386756009 | 0.9596165445027328 |
| 0.7069898575479969 | 0.8776427420437817 | 0.6556079840722645 |
| 0.6771206461064665 | 0.1491417518638697 | 0.8531447037361252 |
| 0.5667611822795273 | 0.3411540533128226 | 0.9790978150848422 |
| 0.5235569536067319 | 0.3719729738978861 | 0.9088739633502526 |
| 0.4743336524419666 | 0.3819024690160812 | 0.0277913652307698 |
| 0.6333402571820814 | 0.0217844580950127 | 0.8970133526991880 |
| 0.6677670242138148 | 0.0900317661892173 | 0.9701530540556531 |
| 0.6223520729742872 | 0.3409408461716865 | 0.8442257048414767 |
| 0.8512820239533393 | 0.4262981084695397 | 0.5149148774250598 |
| 0.6529785696780122 | 0.1364527047447003 | 0.6546731616914919 |
| 0.6179580877685110 | 0.0667235838752429 | 0.5859079608278293 |
| 0.6065739871559641 | 0.0084371327587035 | 0.7032757046007579 |
| 0.9736780040085915 | 0.5167002080545614 | 0.5521454929896793 |
| 0.9068376858630612 | 0.4761511577082569 | 0.6306735262467699 |
| 0.6602474078405247 | 0.1931204261125027 | 0.5141385221027226 |
| 0.5613874270768037 | 0.3197089237921811 | 0.1805990296003348 |
| 0.8660049817086507 | 0.4206873880205927 | 0.3113750593347141 |
| 0.9348391981591305 | 0.4621986782357961 | 0.2372661995956618 |

|                    |                    |                    |
|--------------------|--------------------|--------------------|
| 0.9895653231311931 | 0.5104014846656827 | 0.3534760039329326 |
| 0.4669918295981592 | 0.3573789905100874 | 0.2234871582910785 |
| 0.5087731431446537 | 0.3267549597576452 | 0.2975485670526453 |
| 0.8124175124650843 | 0.3702916964979181 | 0.1741345743244477 |
| 0.2042422683971590 | 0.6238809372275268 | 0.1263192308008372 |
| 0.3986427150118561 | 0.5160173841210799 | 0.0008214934167989 |
| 0.4279882469618873 | 0.4717779570117295 | 0.0717667043009237 |
| 0.4362610839684288 | 0.4218959245028832 | 0.9533816280234180 |
| 0.0754786150685853 | 0.5781364490028601 | 0.0814944933511235 |
| 0.1443558727455155 | 0.6134281183026691 | 0.0088589684678614 |
| 0.3984243971746596 | 0.5709396395702816 | 0.1360308696820136 |
| 0.4831935386452209 | 0.7987788176944675 | 0.4637888340200001 |
| 0.1916346058403606 | 0.5998929567356421 | 0.3247970771143904 |
| 0.1212550282556438 | 0.5640473589290120 | 0.3931399542518147 |
| 0.0622617609413462 | 0.5516239627893480 | 0.2752678706025036 |
| 0.5721233786377815 | 0.9210522136974720 | 0.4255416125774575 |
| 0.5322347598419488 | 0.8545814309613505 | 0.3473202007986823 |
| 0.2490121485782196 | 0.6080843351738091 | 0.4657109170169794 |
| 0.3773190687630325 | 0.5111800551681346 | 0.7991181461498917 |
| 0.4776998005555532 | 0.8130123708455353 | 0.6676311850840568 |
| 0.5186032459993428 | 0.8813986924511739 | 0.7415268664523825 |
| 0.5660442482276513 | 0.9363134761354363 | 0.6248010534619953 |
| 0.4121394532160395 | 0.4154688314670936 | 0.7572340706566204 |
| 0.3832457093281570 | 0.4584439458220300 | 0.6823058900552592 |
| 0.4276020808348956 | 0.7594752470207241 | 0.8053966228173370 |
| 0.5372825053280558 | 0.6585684194449404 | 0.8263699050841602 |
| 0.6950265942566983 | 0.4835272441404864 | 0.1864672449126550 |
| 0.6029475075945266 | 0.7148176785699915 | 0.9333467803848020 |
| 0.7417142910270909 | 0.5541990037220234 | 0.0820657438333656 |
| 0.6962139401050143 | 0.7243792551598391 | 0.7052992479748691 |
| 0.8698436179451099 | 0.6438617768681204 | 0.1469747844150543 |
| 0.7698992482423941 | 0.6404824960317996 | 0.3489012050161772 |
| 0.7000032124953992 | 0.8359983990092543 | 0.8452601183351584 |
| 0.3533694948775813 | 0.5540843705747872 | 0.7140935734759863 |
| 0.3931006788953190 | 0.6954548819716123 | 0.7452771643805614 |
| 0.4260141594392926 | 0.5783584989286658 | 0.3061365724848595 |
| 0.4457687815330073 | 0.7354885408128451 | 0.3802807405302066 |
| 0.3144586223636047 | 0.6354471514060543 | 0.4102736866976087 |
| 0.4198902076280422 | 0.7773484908071865 | 0.9798142613762939 |
| 0.2697374767253317 | 0.6559720472305943 | 0.0459238138982715 |
| 0.3723223727325617 | 0.6128009774568942 | 0.0737231656765813 |
| 0.2312745256507569 | 0.5871688542811495 | 0.6425513903202429 |
| 0.6040275402022390 | 0.2951615233602483 | 0.2656629621364282 |
| 0.7478360167179682 | 0.3356983240572766 | 0.2346114648888213 |
| 0.6291813643871894 | 0.3674630783749379 | 0.6731508363475559 |
| 0.7084000399263081 | 0.2140043307619069 | 0.9336350916546564 |

|                    |                    |                    |
|--------------------|--------------------|--------------------|
| 0.6653438826862303 | 0.3162739818816666 | 0.9080451004621561 |
| 0.6393773874070176 | 0.1754467335627946 | 0.3372443891473563 |
| 0.7876112637386578 | 0.3883006408973277 | 0.5986385910589345 |
| 0.6868427939360068 | 0.2578502636338161 | 0.5701836488194557 |
| 0.8306731631484308 | 0.3625265379623255 | 0.0000982255266733 |
| 0.7571872115118323 | 0.7659502102297622 | 0.6177321643920383 |
| 0.6997163988462434 | 0.6064923477822470 | 0.3845220875861802 |
| 0.8110262375956236 | 0.6946767403353332 | 0.4425287197896193 |
| 0.6672861171279659 | 0.6576888608497918 | 0.6894767317718477 |
| 0.5242510827404110 | 0.6757768585953849 | 0.6241874855831040 |
| 0.7271617163527910 | 0.4657729080665804 | 0.3585482178457808 |
| 0.6654469079517665 | 0.7579366880172262 | 0.8129581803502791 |
| 0.7930871961944150 | 0.6112023690869890 | 0.2047728656656017 |

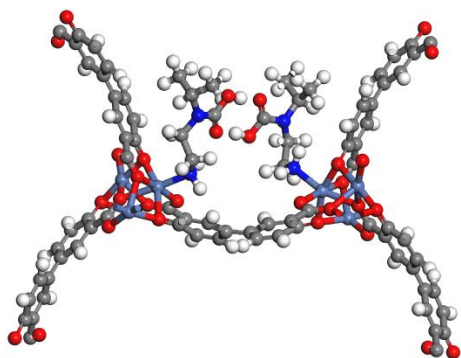

pair-CO<sub>2</sub>-i-2-Ni<sub>2</sub>(dobpdc)

1.0000000000000000

|                      |                     |                     |
|----------------------|---------------------|---------------------|
| 20.9273524539739917  | -0.1162562178139769 | 0.0223524115409342  |
| -10.2705615424105101 | 18.0701996030089092 | -0.0458872183975345 |
| -0.0088688591068298  | 0.0038202972416771  | 6.6944289680505156  |

| Ni | H  | C  | O  | N |
|----|----|----|----|---|
| 6  | 46 | 54 | 22 | 4 |

Direct

|                    |                    |                    |
|--------------------|--------------------|--------------------|
| 0.6495087042607537 | 0.2474179121231046 | 0.1287347959719014 |
| 0.7503294814785590 | 0.3216506148119365 | 0.7884062962875760 |
| 0.6794494280811989 | 0.3625186160629426 | 0.4484467246443984 |
| 0.3017608212143941 | 0.5918590601050155 | 0.8778285761791054 |
| 0.3766334074709263 | 0.6924872188454785 | 0.2199156317985640 |
| 0.4162910433336577 | 0.6196821704238147 | 0.5611046529119079 |
| 0.5089431005379623 | 0.3701326879641442 | 0.7611991163625618 |
| 0.7064197445179730 | 0.1149092438855988 | 0.1260519469658803 |
| 0.6500984729484571 | 0.9854260494473976 | 0.0004815313868463 |
| 0.6094115035556342 | 0.0564045118774672 | 0.4345104256425074 |
| 0.0188892179503526 | 0.5752242561542360 | 0.6710553564958062 |
| 0.8908842723841417 | 0.5050297340781356 | 0.7991001255545456 |
| 0.9428403935902878 | 0.4725838336527417 | 0.0960447779676343 |
| 0.4006436838559324 | 0.3280798481726279 | 0.3315748815334842 |
| 0.4813009181016952 | 0.2810808309093744 | 0.4595498434719900 |
| 0.4277024422264972 | 0.4534447064017186 | 0.2395065985452405 |

|                    |                    |                    |
|--------------------|--------------------|--------------------|
| 0.0432390235329265 | 0.5960474038618173 | 0.0080735418051034 |
| 0.1716542886523698 | 0.6520616007649735 | 0.8825650867333579 |
| 0.6375675384522737 | 0.9584104818213035 | 0.3438918628670322 |
| 0.1132094715509169 | 0.5515323191200636 | 0.5703319027473697 |
| 0.5650551575751521 | 0.8294056382288488 | 0.2161732869637660 |
| 0.3311639023726372 | 0.4193605642743350 | 0.5486613117963657 |
| 0.3814299999486508 | 0.3407826095360988 | 0.6730731916197570 |
| 0.5237187467805811 | 0.8871696116355920 | 0.9058057871938416 |
| 0.7440514794044617 | 0.5047696509159252 | 0.4204913648307667 |
| 0.4817103251516173 | 0.5503369713645725 | 0.6780927168548843 |
| 0.5032577838565402 | 0.6306456838760255 | 0.9704090093579936 |
| 0.5787750512624470 | 0.6186414620082274 | 0.9054100494270543 |
| 0.6651107164707994 | 0.4395607539151172 | 0.0673886564415938 |
| 0.6371912918539735 | 0.5005602116773886 | 0.1652711650156391 |
| 0.5815297077568999 | 0.7549014345056051 | 0.9499993368380757 |
| 0.5786983947857181 | 0.7432963943145907 | 0.6886987671881784 |
| 0.7351290543520790 | 0.5710123166144783 | 0.9392637947063704 |
| 0.7858766680613698 | 0.5281698391393093 | 0.0158050680859603 |
| 0.7902321108893560 | 0.7424015205092189 | 0.5651605111166162 |
| 0.8861562510890835 | 0.6075850328609107 | 0.0666477808192738 |
| 0.6778981235220414 | 0.8218347310079110 | 0.0679958759598733 |
| 0.6880803198883783 | 0.6509267453368963 | 0.4091076947808574 |
| 0.6569093021480654 | 0.4730810483352315 | 0.4661394999770962 |
| 0.5446552095374955 | 0.6230460002241003 | 0.5569227474171328 |
| 0.9329124911068831 | 0.7088131414153338 | 0.4337212364558312 |
| 0.9847793355807539 | 0.6765212111408445 | 0.2977668867674410 |
| 0.9066095224800677 | 0.6129055454835211 | 0.4365055286304269 |
| 0.9070371123329792 | 0.7636674057834867 | 0.1174722248529605 |
| 0.8735543509523822 | 0.7085689097816967 | 0.8965493201818902 |
| 0.9649880686773429 | 0.7395902082736399 | 0.9806458114720371 |
| 0.8247597363246157 | 0.8277608266681611 | 0.9912209574544661 |
| 0.7560012213763940 | 0.7673806015629339 | 0.1634980433156343 |
| 0.7990384904679360 | 0.8648932859966507 | 0.1956381608913702 |
| 0.7873606105451429 | 0.8972157282609317 | 0.7246104367767501 |
| 0.7750658194471853 | 0.9431535829395301 | 0.9328534125250556 |
| 0.7021629340003841 | 0.8962329282207548 | 0.7579118449327495 |
| 0.9290106731319980 | 0.6629166709052186 | 0.3436054616160931 |
| 0.9080362361167857 | 0.7194870052072915 | 0.0300306776681225 |
| 0.7783600872071830 | 0.8202821409333296 | 0.0835182617090879 |
| 0.7472906990684507 | 0.8940635691036363 | 0.8357822890305329 |
| 0.6892572483990449 | 0.1592525524897397 | 0.8543486284750372 |
| 0.5464507043282723 | 0.3225010012099148 | 0.9821131954076350 |
| 0.5005240996300273 | 0.3492698064344495 | 0.9138817448143683 |
| 0.4491932429314289 | 0.3537674564782094 | 0.0365054552140691 |
| 0.6527941011384470 | 0.0289429539317823 | 0.9034964803911336 |
| 0.6846519971703060 | 0.1010463249599312 | 0.9744649498599927 |

|                    |                    |                    |
|--------------------|--------------------|--------------------|
| 0.6025467831753133 | 0.3268727660636941 | 0.8391466321474539 |
| 0.8433701928320332 | 0.4488435192977036 | 0.5226020879524924 |
| 0.6636883314039039 | 0.1418624698209570 | 0.6527808586774029 |
| 0.6313109311904199 | 0.0679782944196603 | 0.5861748156185911 |
| 0.6243047392361873 | 0.0105689288201347 | 0.7079850981706173 |
| 0.9745085416935169 | 0.5370680438104785 | 0.5723855204609762 |
| 0.9031232282797390 | 0.4986635482895139 | 0.6443749209140535 |
| 0.6672795176626707 | 0.1966974997982831 | 0.5051682569248896 |
| 0.5420620737012172 | 0.3003052527279380 | 0.1863175271198116 |
| 0.8592835574022075 | 0.4419310657643862 | 0.3178682243816198 |
| 0.9326285002849914 | 0.4820006856500996 | 0.2500333044917227 |
| 0.9911046073482765 | 0.5293649083346139 | 0.3728223600093798 |
| 0.4421101483163881 | 0.3273801453203404 | 0.2339834599873925 |
| 0.4866119431167135 | 0.3009202150785057 | 0.3063488257969098 |
| 0.8041705262133902 | 0.3912893408594655 | 0.1695927638836494 |
| 0.2154755557212553 | 0.6332022100202721 | 0.1526714297494394 |
| 0.3767549777051258 | 0.4883830813189363 | 0.0223719617239198 |
| 0.4053470343706280 | 0.4436381005765710 | 0.0883827761291371 |
| 0.4096912753645867 | 0.3917650735526834 | 0.9659109426663122 |
| 0.0862031015501685 | 0.5976335430190431 | 0.1042157528682210 |
| 0.1577790208322938 | 0.6294636845737855 | 0.0333250332594659 |
| 0.3801497843157264 | 0.5439909509287588 | 0.1674739872962832 |
| 0.5031150989431836 | 0.7843191830504139 | 0.4859936736086041 |
| 0.1980643864758562 | 0.6068885440126977 | 0.3534335471301944 |
| 0.1247026805927689 | 0.5741764910834561 | 0.4194471873882435 |
| 0.0677226293327564 | 0.5678943883143575 | 0.2985344587932630 |
| 0.5964416114693876 | 0.9149249248463960 | 0.4395172042140132 |
| 0.5566135976764670 | 0.8429553587568108 | 0.3677733005347008 |
| 0.2523858443895506 | 0.6103403079534502 | 0.5015601350132641 |
| 0.3521341078501905 | 0.4822087864870213 | 0.8200688557464701 |
| 0.4936284399578739 | 0.8018752377003864 | 0.6870977319710789 |
| 0.5345044407398092 | 0.8757124390068469 | 0.7543482546509708 |
| 0.5855567574232410 | 0.9332016028150392 | 0.6345397105064237 |
| 0.3810523543685136 | 0.3827318267598443 | 0.7706930668700309 |
| 0.3526206777692735 | 0.4260444914357393 | 0.7003511620047433 |
| 0.4439494916218223 | 0.7466908710193252 | 0.8363765361083324 |
| 0.5447401794977367 | 0.6422513632796694 | 0.8547573063070146 |
| 0.6818944985174440 | 0.4877002081596018 | 0.1652211642016397 |
| 0.5934507632701127 | 0.7267576181658697 | 0.8295320544951181 |
| 0.7520215458827693 | 0.5512314851525204 | 0.0710794857026400 |
| 0.7020582383305083 | 0.7339418964856819 | 0.6856989573896257 |
| 0.8817754381044267 | 0.6494195667859088 | 0.1573699357378473 |
| 0.7756185221336409 | 0.6512053023651063 | 0.3120655583902519 |
| 0.7182858064836637 | 0.8231413744596168 | 0.9603917965477464 |
| 0.3317929943610096 | 0.5271828968527998 | 0.7337569407399513 |
| 0.4094669456470186 | 0.6768946748779712 | 0.7926452612234343 |

|                    |                    |                    |
|--------------------|--------------------|--------------------|
| 0.4110655218580277 | 0.5508806272429752 | 0.3349655950718997 |
| 0.4662939931801304 | 0.7164456868903528 | 0.4024716042041021 |
| 0.3217262598659900 | 0.6422416223244269 | 0.4610713307568588 |
| 0.4375475832531919 | 0.7682737236733601 | 0.0094132629605070 |
| 0.2826410534658024 | 0.6611704322722503 | 0.0696805019071149 |
| 0.3521606358674916 | 0.5852369103244754 | 0.1215021430160661 |
| 0.2293431015846679 | 0.5823463844985355 | 0.6741480875858628 |
| 0.5878488956707528 | 0.2811718884828096 | 0.2726964261733684 |
| 0.7350192618276026 | 0.3553554002933552 | 0.2142158263368827 |
| 0.6111108605159856 | 0.3599772621991875 | 0.6737564958349935 |
| 0.7172399901189408 | 0.2269278999710806 | 0.9380057572022906 |
| 0.6428873458538362 | 0.2979108862951421 | 0.8842864586409291 |
| 0.6388466240440778 | 0.1739050929359891 | 0.3328011168151406 |
| 0.7762598482724457 | 0.4120005377968425 | 0.6074160648788762 |
| 0.6998272618870800 | 0.2665435330237855 | 0.5465176980530231 |
| 0.8255311008482877 | 0.3842830857425952 | 0.9971058164435576 |
| 0.7749128051938001 | 0.7660146862768897 | 0.6784514869124507 |
| 0.7026214352189584 | 0.6227823957570777 | 0.3069315626857616 |
| 0.8178281452676401 | 0.7079558486470106 | 0.4120754623412282 |
| 0.6601515461254905 | 0.6847334191161565 | 0.5612868029737399 |
| 0.5053127860323272 | 0.6068462160311441 | 0.6666195237830550 |
| 0.6920258287935681 | 0.4676252028233066 | 0.3707659171168771 |
| 0.6734734134599094 | 0.7558273640276667 | 0.8351107775940534 |
| 0.8010981004199991 | 0.6135356525359583 | 0.2015822114994421 |

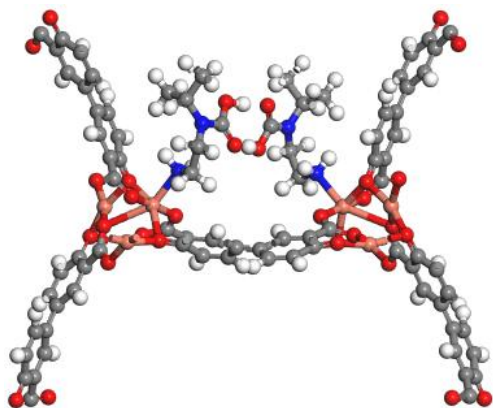

pair-CO<sub>2</sub>-i-2-Cu<sub>2</sub>(dobpdc)

1.0000000000000000

|                     |                     |                     |
|---------------------|---------------------|---------------------|
| 21.0353581350727730 | -0.2257704102785332 | 0.0398901799210638  |
| -9.3643349106098004 | 19.0537789404752580 | -0.0240966465004676 |
| 0.0142614841808171  | -0.0025181352397357 | 6.3092358514889080  |

Cu H C O N

6 46 54 22 4

Direct

|                    |                    |                    |
|--------------------|--------------------|--------------------|
| 0.6422671153021867 | 0.2419819681297693 | 0.0914719210956027 |
| 0.7554177581844003 | 0.2991854900841755 | 0.7559522813567097 |
| 0.6898486686872891 | 0.3657115485966432 | 0.4131111681946105 |
| 0.2977093002211644 | 0.5921009849118001 | 0.8870700142306399 |

|                    |                    |                    |
|--------------------|--------------------|--------------------|
| 0.3542408499805700 | 0.7039365156448558 | 0.2219025329294066 |
| 0.4225528974331846 | 0.6400088287190863 | 0.5643445302691755 |
| 0.5373725010046345 | 0.4007778472557649 | 0.7373667763610738 |
| 0.6950827191146511 | 0.1011931337932793 | 0.1276587927977885 |
| 0.6298449189649065 | 0.9774623105930367 | 0.0001474864938781 |
| 0.5852892345248746 | 0.0524927120641678 | 0.4129368172211215 |
| 0.0039939599387774 | 0.5580918997518312 | 0.6553400918004590 |
| 0.8809194649216564 | 0.4885015633806838 | 0.7935166881969337 |
| 0.9428557451298162 | 0.4435419167043640 | 0.0665087565493652 |
| 0.4241896042184499 | 0.3566943547272856 | 0.3316662168526219 |
| 0.4947661123798888 | 0.2968203113541223 | 0.4595643910927841 |
| 0.4555967175828867 | 0.4858106278207874 | 0.2447576329785233 |
| 0.0294434209039120 | 0.5752150260158055 | 0.9769596486484902 |
| 0.1543370756099649 | 0.6419156876618427 | 0.8502699917882104 |
| 0.6134338249761556 | 0.9527048334034552 | 0.3209882967563532 |
| 0.1058204797355076 | 0.5320073458457490 | 0.5643015316363766 |
| 0.5446728053043893 | 0.8307241806888472 | 0.1827664118299704 |
| 0.3513656056534284 | 0.4453461795713677 | 0.5223382769742855 |
| 0.4086979131137430 | 0.3727959732744014 | 0.6525010952974519 |
| 0.4976517543757941 | 0.8902306772496917 | 0.9100165799007461 |
| 0.7825316474023840 | 0.4958792778487377 | 0.3029622978403382 |
| 0.5665651862313901 | 0.6696991368773774 | 0.5583200510233280 |
| 0.5037883762348941 | 0.6525885914891314 | 0.9813747222069380 |
| 0.5460978276881950 | 0.6060620716097098 | 0.8608751515607830 |
| 0.6898877926049795 | 0.4543814771577492 | 0.0103399167984077 |
| 0.6477654036547416 | 0.4927331880593094 | 0.1712593149991318 |
| 0.6329211642953428 | 0.6753065948837070 | 0.1004466212207563 |
| 0.6051003179543589 | 0.7426033332716926 | 0.1040119582326590 |
| 0.7108305958589205 | 0.5843315948494323 | 0.9323103210847460 |
| 0.7785676300175249 | 0.5578910749920976 | 0.8929719333851984 |
| 0.7842802341437325 | 0.7414767361159574 | 0.5388004430747412 |
| 0.8767305617791389 | 0.6258867952854464 | 0.9521249572821564 |
| 0.6935687946735963 | 0.6359293093096652 | 0.4870787555125574 |
| 0.6774408074221386 | 0.8377739437314192 | 0.0398977751347748 |
| 0.7230917900642316 | 0.5070043694786081 | 0.4457843739376889 |
| 0.5539409938116518 | 0.7339201929507254 | 0.6632352727941533 |
| 0.6480573559525568 | 0.8536978138762917 | 0.6716505068383256 |
| 0.7348287061507074 | 0.8697513950046121 | 0.5845029157806728 |
| 0.7235859695743408 | 0.9296964227837483 | 0.7608817823214016 |
| 0.8032646634476732 | 0.9167910686913803 | 0.0551929473073991 |
| 0.8245877648155555 | 0.8642466934804012 | 0.8756759015120256 |
| 0.7893951100421489 | 0.8309960559811321 | 0.1320172918393120 |
| 0.9148963143155392 | 0.6711548337253400 | 0.4151944871115317 |
| 0.9738182698270358 | 0.6653830676336543 | 0.2206982875409292 |
| 0.8982373596455731 | 0.5880061902000879 | 0.3024265949421208 |
| 0.9069453796550783 | 0.7677696421870556 | 0.1551137240440008 |



|                    |                    |                    |
|--------------------|--------------------|--------------------|
| 0.8718873075829547 | 0.7392462896119427 | 0.8954420654294277 |
| 0.9587041828530333 | 0.7509546268765012 | 0.9594622599865487 |
| 0.9176746196270223 | 0.6444388144595931 | 0.2684151859276118 |
| 0.9045457356438085 | 0.7334939226860204 | 0.0221448565946409 |
| 0.7868303660960606 | 0.8627253894356354 | 0.9980262942090558 |
| 0.7038780329510682 | 0.8736478928896776 | 0.7204060879741652 |
| 0.6761889779864598 | 0.1469245167261193 | 0.8450060801113024 |
| 0.5654401197997011 | 0.3424054907327151 | 0.9625008352361486 |
| 0.5264091724478693 | 0.3776809598027430 | 0.8955900695795129 |
| 0.4765153810358344 | 0.3849461478389366 | 0.0271741055466452 |
| 0.6332280147729539 | 0.0207096063229145 | 0.8999765718081945 |
| 0.6701657214892851 | 0.0896243551245724 | 0.9719283748113609 |
| 0.6139629915114453 | 0.3338401787678311 | 0.8062716617791195 |
| 0.8421051844354127 | 0.4259370003940827 | 0.5108992088141385 |
| 0.6479807962131534 | 0.1320437585954750 | 0.6360489543906424 |
| 0.6091492843616318 | 0.0616894255966690 | 0.5701512278276853 |
| 0.6006161234713261 | 0.0050430219418409 | 0.6995930312869779 |
| 0.9639731598230750 | 0.5171219429312615 | 0.5572168308524180 |
| 0.8954419680787433 | 0.4788988266855939 | 0.6348425312503909 |
| 0.6617780702898501 | 0.1880015678424859 | 0.4759193497671220 |
| 0.5574704097992853 | 0.3166244975023532 | 0.1742767691930886 |
| 0.8598845649530695 | 0.4165168331046462 | 0.2979988188014607 |
| 0.9304396688066799 | 0.4548565009069818 | 0.2259042657408649 |
| 0.9834191028010097 | 0.5053995079520198 | 0.3527214118308853 |
| 0.4650195191140351 | 0.3541121738887524 | 0.2299246728452415 |
| 0.5038840132753436 | 0.3204067653675510 | 0.3022062112367654 |
| 0.8057746311258194 | 0.3703428888192745 | 0.1418803664924957 |
| 0.2007715554950626 | 0.6237684334596415 | 0.1330185961053125 |
| 0.3984136487486299 | 0.5154024406878592 | 0.0184433993093228 |
| 0.4324156880052295 | 0.4753392406461690 | 0.0865210207263433 |
| 0.4381139997718506 | 0.4247931178807453 | 0.9560482830944671 |
| 0.0732517076351830 | 0.5791948991750241 | 0.0772288725083447 |
| 0.1427854707342849 | 0.6169569558679243 | 0.0058062281538316 |
| 0.3905894075895133 | 0.5642126759068762 | 0.1735543627855730 |
| 0.4817238621811890 | 0.7911032653830030 | 0.4658329415401098 |
| 0.1859435892598220 | 0.5954945920579673 | 0.3418359692558139 |
| 0.1149767457866326 | 0.5558411115888259 | 0.4071887776289359 |
| 0.0576893757966164 | 0.5465267951048122 | 0.2773640747673212 |
| 0.5724490556484403 | 0.9125930952904913 | 0.4193690747915067 |
| 0.5347372783350062 | 0.8446045691610763 | 0.3418267086038293 |
| 0.2424574393802152 | 0.6100454805614107 | 0.5021786743870262 |
| 0.3726255168912316 | 0.5078795456605120 | 0.8065676066439430 |
| 0.4717195117497885 | 0.8084095976125025 | 0.6786022694781417 |
| 0.5095315198653053 | 0.8783534413648314 | 0.7506600204413453 |
| 0.5601685887498055 | 0.9314015157661732 | 0.6239471994394449 |
| 0.4072900532078618 | 0.4140060610052434 | 0.7532223024128928 |

|                    |                    |                    |
|--------------------|--------------------|--------------------|
| 0.3750275849184847 | 0.4539722965383615 | 0.6796642560488380 |
| 0.4253629282971012 | 0.7544965088380913 | 0.8348171527366844 |
| 0.5484078200631151 | 0.6583198008267956 | 0.8792045230708708 |
| 0.6995958889145976 | 0.4959387135079746 | 0.1277775243110489 |
| 0.6172706594403405 | 0.7081368368222847 | 0.9990961754429842 |
| 0.7462084089125877 | 0.5669615437794485 | 0.0148246457441971 |
| 0.7054914673470475 | 0.7260698724467526 | 0.7280547071402426 |
| 0.8745731847631589 | 0.6562692024145595 | 0.0917447806078643 |
| 0.7746290833903734 | 0.6512304435467953 | 0.3085419074064137 |
| 0.7107385071480714 | 0.8329251626346295 | 0.9116554580753847 |
| 0.3477041080915924 | 0.5500299005322621 | 0.7199286413632858 |
| 0.4096690671165001 | 0.6890656781035442 | 0.8103042456940849 |
| 0.4318296310388938 | 0.5828501932102451 | 0.3345010839434625 |
| 0.4446763267460155 | 0.7269046097945356 | 0.3798468980462663 |
| 0.3048797414772631 | 0.6614996938480391 | 0.4810226413574828 |
| 0.4050596853032253 | 0.7748421906107467 | 0.0008700881711280 |
| 0.2669421314670695 | 0.6561567868716333 | 0.0496268851672538 |
| 0.3426887227725924 | 0.5853105635700445 | 0.1500149943799614 |
| 0.2256262613645026 | 0.5720242669532171 | 0.6694265794271220 |
| 0.5991239366552240 | 0.2907351187131738 | 0.2601548656933093 |
| 0.7396244887804927 | 0.3546605752788061 | 0.1655540786338080 |
| 0.6326927595038021 | 0.3746578921953135 | 0.6449348419002208 |
| 0.7078108370508825 | 0.2124381840508207 | 0.9284928228597140 |
| 0.6346311986505011 | 0.2858843265491242 | 0.8287814682127117 |
| 0.6233321027627139 | 0.1708938593456966 | 0.3091250855314381 |
| 0.7774504426310013 | 0.3883086934207878 | 0.5970955348594891 |
| 0.7130291776273615 | 0.2502106767924508 | 0.4968060805199054 |
| 0.8266474383835650 | 0.3501740490594838 | 0.9766285636061800 |
| 0.7635771992144548 | 0.7703699603335803 | 0.6245687026432221 |
| 0.7042496845427657 | 0.6180202221441267 | 0.3440339421200106 |
| 0.8163540476563080 | 0.7028851157876383 | 0.4188415238624009 |
| 0.6760672239255112 | 0.6599797669310754 | 0.6969593079144387 |
| 0.5369547956204820 | 0.6805332959216157 | 0.6680716104728852 |
| 0.7290223267791555 | 0.4798087653751703 | 0.3195019741122294 |
| 0.6782561606139512 | 0.7555451054902276 | 0.8697980852920231 |
| 0.7973171013259487 | 0.6246676390584762 | 0.1462775256553564 |

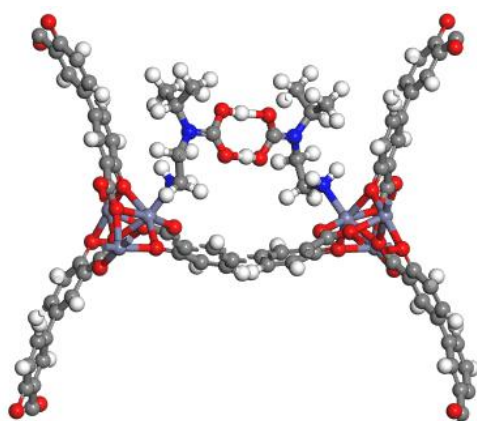

pair-CO<sub>2</sub>-i-2-Zn<sub>2</sub>(dobpdc)

1.0000000000000000

20.9036697012883366 0.0802918480073141 0.0152047727712816

-9.1202970307223374 18.9049054310818931 -0.0053246606968085

-0.0045309724535666 0.0123088699043908 6.9275370789748036

Zn H C O N

6 46 54 22 4

Direct

0.6615706352472444 0.2469051834683285 0.1385433036292270

0.7547881598015209 0.3082235541216676 0.7992424808063276

0.6889369463686137 0.3541375492659853 0.4554623100511819

0.3037343750911390 0.6073456314284726 0.8419811144844545

0.3647705496621825 0.7000116314268325 0.1818649652353983

0.4122053749718759 0.6349689172155664 0.5233100158970672

0.5339595117444986 0.3904438525734264 0.7614211294748614

0.6848785476758295 0.0971457522608574 0.1127452838823189

0.6227882612544917 0.9748033410278580 0.9886804932823594

0.5950639912743654 0.0573977449571430 0.4415962951256347

0.0159620867769164 0.5455090799775917 0.6431976333250731

0.8972402844061733 0.4711368299733678 0.7803289117249292

0.9443190547829658 0.4503647206089525 0.0864718497012760

0.4313531410842799 0.3650683738955323 0.3138981088650112

0.5077447248158933 0.3113733706402400 0.4435561547756137

0.4477034950636565 0.4795300499338424 0.2174618185360018

0.0300918120589131 0.5658433032055186 0.9925667305950441

0.1528824164129858 0.6297043914474258 0.8689221080113114

0.6049208913452304 0.9605696332181353 0.3384487123474713

0.1135662915044691 0.5384160639505637 0.5387002420595692

0.5307266861907323 0.8423475581432243 0.2009029237464688

0.3695372210150794 0.4554386126738521 0.5348301103020248

0.4209813308322481 0.3773464545631100 0.6651890177921942

0.5071440228920494 0.8887603055858193 0.8933515455661620

0.7823481705819688 0.4750152132005354 0.3403038045538551

0.5458436294526621 0.6521091592511397 0.5278088684580169

0.4894835653932290 0.6597323628573903 0.9035159287686980

|                    |                    |                    |
|--------------------|--------------------|--------------------|
| 0.5453689497565932 | 0.6201000658615712 | 0.8321204200198409 |
| 0.6842571544453691 | 0.4422227505967626 | 0.0921552563487609 |
| 0.6486926485705169 | 0.4834322269307378 | 0.2541265351680266 |
| 0.6108935819927765 | 0.7184205192074202 | 0.0425217587943294 |
| 0.5773766210251310 | 0.7726949798970182 | 0.9256772554406894 |
| 0.7127699766298932 | 0.5731341969940189 | 0.0268133465185301 |
| 0.7806059154318561 | 0.5446650424033024 | 0.0011112272913394 |
| 0.7750364243802608 | 0.7375003873443760 | 0.5500725784506670 |
| 0.8774189603669527 | 0.6006753764623340 | 0.0952850834500154 |
| 0.6842971151005131 | 0.6326074698435491 | 0.4992197084082122 |
| 0.6644811011390956 | 0.8589604268645061 | 0.9045241465026166 |
| 0.7296154163501427 | 0.4906051216835294 | 0.4868618077335896 |
| 0.5396951551489622 | 0.7255974901181617 | 0.5727658202949115 |
| 0.7892085701638152 | 0.9199968111629460 | 0.9887802495722795 |
| 0.8097552685225793 | 0.8575377466880454 | 0.8618224755071822 |
| 0.7558446443797990 | 0.8315349249686932 | 0.0734363146521275 |
| 0.6682329936724543 | 0.8751506249440197 | 0.5480061505163576 |
| 0.7575539979669728 | 0.8851004485480516 | 0.5451019480660051 |
| 0.7351357973109529 | 0.9463779026920918 | 0.6725315443364082 |
| 0.9159119860788039 | 0.6774165670714751 | 0.4834699983109800 |
| 0.9700319503453869 | 0.6510893906682611 | 0.3351073371229916 |
| 0.8934355792551330 | 0.5861006076511259 | 0.4459783437029330 |
| 0.8982837930171641 | 0.7506546483546472 | 0.1952791398738327 |
| 0.8709156371005804 | 0.7086218172426939 | 0.9661643198443102 |
| 0.9568209483443013 | 0.7274653675923162 | 0.0567919718931691 |
| 0.9151925851688532 | 0.6384078338206649 | 0.3772765122103010 |
| 0.9011122461783003 | 0.7108121161060268 | 0.0978133990514962 |
| 0.7682403507657440 | 0.8645662361367101 | 0.9429842836398166 |
| 0.7167271659101075 | 0.8904888992666429 | 0.6338885407124337 |
| 0.6749295718088533 | 0.1466705688215342 | 0.8494540601830991 |
| 0.5693878762335913 | 0.3416149842222467 | 0.9803360508013057 |
| 0.5257187100907572 | 0.3718542467674624 | 0.9104788254925253 |
| 0.4769912443947035 | 0.3826269846617407 | 0.0269565376818264 |
| 0.6295097192500521 | 0.0191775134382155 | 0.8948825107197180 |
| 0.6647230732075613 | 0.0874478639850338 | 0.9652165908448183 |
| 0.6243031605293083 | 0.3407978085622645 | 0.8460824569146794 |
| 0.8527945961132630 | 0.4192323886868010 | 0.5128603062232386 |
| 0.6507474045596169 | 0.1341562598783597 | 0.6552102337751222 |
| 0.6152587204706776 | 0.0644906752848584 | 0.5888741916567071 |
| 0.6029737395686681 | 0.0060282976209649 | 0.7046945202854289 |
| 0.9745926852354785 | 0.5082508564257679 | 0.5503531594405899 |
| 0.9084385813683298 | 0.4674758899428184 | 0.6278024731227134 |
| 0.6589006625558795 | 0.1906507251977629 | 0.5141152865369634 |
| 0.5645799975663621 | 0.3209515046296616 | 0.1784260720143109 |
| 0.8669979357851076 | 0.4150195911750032 | 0.3119877264596127 |
| 0.9350047088330413 | 0.4572488065866551 | 0.2383502486854070 |

|                    |                    |                    |
|--------------------|--------------------|--------------------|
| 0.9897262584586741 | 0.5040684171374608 | 0.3532131071645779 |
| 0.4705099825909755 | 0.3592089328994987 | 0.2202104857336664 |
| 0.5126056109244104 | 0.3288480703107695 | 0.2935346261057177 |
| 0.8135904588725467 | 0.3652993415338130 | 0.1760194221121836 |
| 0.2029291938656428 | 0.6201060802557237 | 0.1316524316312311 |
| 0.4001632905850130 | 0.5163336274892387 | 0.9980430844389616 |
| 0.4293934362753973 | 0.4718752646464637 | 0.0681804246635025 |
| 0.4388731861217821 | 0.4225138979570033 | 0.9521231279011459 |
| 0.0747432828220767 | 0.5729145692345554 | 0.0861429763600086 |
| 0.1432689310013728 | 0.6091651383979624 | 0.0161330144925174 |
| 0.3983570116257766 | 0.5701776795207039 | 0.1331777314273452 |
| 0.4772443021985779 | 0.7979733807059119 | 0.4673007739428741 |
| 0.1904750661299204 | 0.5954781131140550 | 0.3257193825064988 |
| 0.1205255014854743 | 0.5588465841789656 | 0.3916575835897689 |
| 0.0617081705026408 | 0.5458921932442493 | 0.2759558171426875 |
| 0.5671394448891434 | 0.9192639431601890 | 0.4307601264951089 |
| 0.5264824664241061 | 0.8533894893970313 | 0.3531814546450249 |
| 0.2472242130940430 | 0.6043560555340051 | 0.4671767232714430 |
| 0.3795220805075488 | 0.5118788835316366 | 0.8000594478165084 |
| 0.4725382786571757 | 0.8119713812365674 | 0.6678798771008942 |
| 0.5146132307044624 | 0.8796154328270234 | 0.7417299627745066 |
| 0.5619369902970206 | 0.9342715021755055 | 0.6273743472154791 |
| 0.4159684506441295 | 0.4168403120676700 | 0.7585717805512644 |
| 0.3869481932004959 | 0.4599308031558138 | 0.6848008311213434 |
| 0.4228271465468154 | 0.7585488444671000 | 0.8041049339414599 |
| 0.5361710415783563 | 0.6673002022883523 | 0.8166868921416395 |
| 0.6981398238378631 | 0.4831247236916241 | 0.2031853829444117 |
| 0.5974273711976466 | 0.7328631351402493 | 0.8998205511716009 |
| 0.7465616484552342 | 0.5540220824980864 | 0.1072062075727089 |
| 0.6910570412506587 | 0.7316513060810905 | 0.6852303416585528 |
| 0.8727375079972575 | 0.6385608663054612 | 0.1975782581234213 |
| 0.7693280519757764 | 0.6405599063786127 | 0.3664155897102006 |
| 0.7019074610267992 | 0.8464656765464298 | 0.8187716336739044 |
| 0.3543100757907069 | 0.5542124423138048 | 0.7161698759737192 |
| 0.3844179358099566 | 0.6966063429036140 | 0.7381260924429114 |
| 0.4211298586747318 | 0.5731600018779872 | 0.3045148303703797 |
| 0.4395375028393218 | 0.7351552701089261 | 0.3844303568158267 |
| 0.3118009214749975 | 0.6285829534548455 | 0.4105459978109778 |
| 0.4206691560262854 | 0.7751491996859770 | 0.9804759124185978 |
| 0.2679935935470894 | 0.6534530812131152 | 0.0507479008837635 |
| 0.3755670665238497 | 0.6144619326737484 | 0.0691789482470355 |
| 0.2288405944441649 | 0.5873866679374089 | 0.6429476078215401 |
| 0.6071171125595782 | 0.2960060985940558 | 0.2630993532659076 |
| 0.7510978912702981 | 0.3274140606024858 | 0.2416954125798227 |
| 0.6261563877583001 | 0.3618912289698883 | 0.6731923609570600 |
| 0.7072891494580915 | 0.2115683505380304 | 0.9299025200634432 |

|                    |                    |                    |
|--------------------|--------------------|--------------------|
| 0.6705433051181799 | 0.3211405588218312 | 0.9133599771611145 |
| 0.6424448038832296 | 0.1724711774694967 | 0.3382514795234783 |
| 0.7894489661640733 | 0.3818670695365256 | 0.5949774296408634 |
| 0.6820166720118124 | 0.2547332169231424 | 0.5715274257689984 |
| 0.8306815082013941 | 0.3623643254727114 | 0.0004808580496061 |
| 0.7544723348390505 | 0.7703007606079098 | 0.6092167372776132 |
| 0.6987013197805396 | 0.6091426617686366 | 0.3861958193062307 |
| 0.8086400147405683 | 0.6940627872807212 | 0.4620199481790266 |
| 0.6595537171495423 | 0.6653250027217226 | 0.6655504277624402 |
| 0.5196244834481263 | 0.6733792611437224 | 0.6114562697492048 |
| 0.7299445141694392 | 0.4621439621038448 | 0.3673329236597880 |
| 0.6619016085186047 | 0.7689076611576127 | 0.7827168817031236 |
| 0.7950253442617949 | 0.6093366761281018 | 0.2357577481555779 |

The optimized structures (A–F) and coordinate files in the reaction pathway are listed as follows:

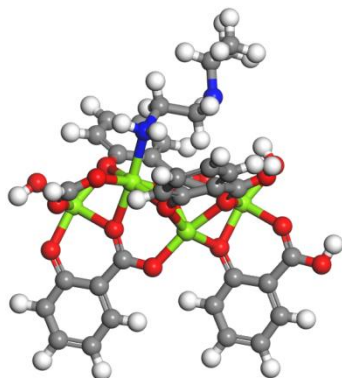

Mg–(A) i–2–MOF

-1 1

|    |    |             |            |             |
|----|----|-------------|------------|-------------|
| H  | 0  | 1.77934600  | 7.53045400 | -1.41418800 |
| H  | -1 | 3.28587800  | 5.54927200 | -1.72331900 |
| Mg | -1 | -1.95192100 | 1.88572000 | -1.39510700 |
| O  | -1 | -3.91838800 | 1.66264500 | -1.73140400 |
| O  | -1 | -0.07681800 | 2.58829200 | -1.16085200 |
| O  | -1 | -2.56389900 | 3.74407700 | -0.86089500 |
| O  | -1 | -2.66929500 | 5.96927200 | -0.78422800 |
| O  | -1 | -1.72452200 | 1.56756600 | 0.60649700  |
| O  | -1 | -3.71292500 | 2.03002300 | 1.48902000  |
| H  | 0  | -4.05093000 | 0.75869100 | -2.03857900 |
| C  | -1 | 0.34478000  | 3.86105800 | -1.25140100 |
| C  | -1 | -0.52241800 | 4.99284000 | -1.13301500 |
| C  | -1 | 0.02277900  | 6.28738400 | -1.18904800 |
| C  | -1 | 1.38290900  | 6.52221900 | -1.37913000 |
| C  | -1 | 2.22033700  | 5.39852900 | -1.53587200 |
| C  | -1 | 1.71951600  | 4.10829400 | -1.47566000 |
| C  | -1 | -1.98841300 | 4.89870200 | -0.90843100 |
| C  | -1 | -2.06495900 | 1.03799300 | 2.91129500  |
| C  | -1 | -2.95948800 | 1.08176500 | 3.99366400  |

|    |    |             |             |             |
|----|----|-------------|-------------|-------------|
| C  | -1 | -2.53414600 | 1.58742000  | 1.61959900  |
| H  | 0  | -3.36769600 | 0.55603800  | 6.05196100  |
| C  | 0  | -5.00368500 | -3.11470300 | -0.98420200 |
| C  | 0  | -6.12285200 | -2.96287300 | 0.03872200  |
| C  | 0  | -5.56210100 | -3.16264800 | -2.40017000 |
| H  | -1 | -0.66487700 | 7.12018000  | -1.03951400 |
| H  | -1 | -3.93301200 | 1.53946700  | 3.81355300  |
| H  | 0  | -3.43406300 | -2.03733600 | -1.69062000 |
| H  | 0  | -6.65142300 | -2.01615900 | -0.11752300 |
| H  | 0  | -5.74759100 | -2.97862800 | 1.06671500  |
| H  | 0  | -6.84104800 | -3.78246400 | -0.06031700 |
| H  | 0  | -6.09264300 | -2.23241400 | -2.63066800 |
| H  | 0  | -6.25831600 | -3.99826000 | -2.51613800 |
| H  | 0  | -4.76007400 | -3.28939500 | -3.13623300 |
| N  | 0  | -4.07317900 | -1.98671400 | -0.90167300 |
| H  | 0  | 6.73551900  | 2.99844500  | -0.18173500 |
| H  | -1 | 8.24095100  | 1.01696400  | -0.49035400 |
| Mg | -1 | 3.00310900  | -2.64657600 | -0.16216900 |
| Mg | -1 | 0.29366500  | 1.31696800  | 0.39274100  |
| Mg | 0  | 0.48080100  | -1.60566900 | 1.06864600  |
| O  | 0  | 0.96520800  | -2.88532700 | -0.47804100 |
| O  | 0  | -0.17656100 | -0.43261000 | -0.54321600 |
| O  | -1 | -1.42097700 | 0.13193600  | -2.28586300 |
| O  | -1 | 4.87828000  | -1.94401200 | 0.07202500  |
| O  | 0  | 2.38209800  | -0.76616500 | 0.40104900  |
| O  | -1 | 2.28576200  | 1.43695100  | 0.44872000  |
| O  | 0  | 0.05557500  | 0.20337800  | 2.07578200  |
| O  | -1 | 3.23055100  | -2.96473500 | 1.83943400  |
| O  | 0  | 1.22838700  | -2.54665500 | 2.79288000  |
| C  | -1 | 0.41417300  | -3.03639600 | -1.67230600 |
| C  | -1 | -0.43455600 | -2.05040900 | -2.27649200 |
| C  | -1 | -1.01408700 | -2.30262900 | -3.53146400 |
| C  | -1 | -0.82385800 | -3.49692800 | -4.22238500 |
| C  | -1 | -0.01507100 | -4.47463200 | -3.60556100 |
| C  | -1 | 0.58539700  | -4.25279100 | -2.37748800 |
| C  | -1 | -0.68809700 | -0.71648300 | -1.68285200 |
| C  | -1 | 5.29984500  | -0.67124500 | -0.01840400 |
| C  | -1 | 4.43265200  | 0.46053900  | 0.09993300  |
| C  | -1 | 4.97784700  | 1.75507600  | 0.04388800  |
| C  | -1 | 6.33798200  | 1.98991100  | -0.14616300 |
| C  | -1 | 7.17540900  | 0.86622100  | -0.30291300 |
| C  | -1 | 6.67458900  | -0.42401400 | -0.24269900 |
| C  | -1 | 2.96673100  | 0.36637700  | 0.32469400  |
| C  | -1 | -0.81054400 | 0.35747800  | 3.05121100  |
| H  | 0  | 2.81228500  | -3.28352900 | 3.82437400  |
| C  | -1 | -2.66153700 | 0.51586400  | 5.23128400  |

|   |    |             |             |             |
|---|----|-------------|-------------|-------------|
| C | -1 | -1.39730300 | -0.09718100 | 5.37647600  |
| C | -1 | -0.50058500 | -0.17663300 | 4.32525700  |
| C | -1 | 2.42091900  | -2.94489000 | 2.85255700  |
| C | 0  | -2.40347100 | -3.07213900 | 0.66396200  |
| C | 0  | -3.28383300 | -1.87084500 | 0.31266500  |
| H | 0  | -1.81947800 | -2.23568000 | 2.44121200  |
| H | -1 | -1.59836000 | -1.49573200 | -3.97512100 |
| H | -1 | 1.23040700  | -5.01227600 | -1.93055000 |
| H | -1 | 4.29019600  | 2.58787200  | 0.19345100  |
| H | -1 | 2.37571000  | 3.24492400  | -1.59729800 |
| H | -1 | -1.11824300 | -0.51244400 | 6.34724000  |
| H | -1 | 0.47134500  | -0.65845600 | 4.44581500  |
| H | 0  | -1.89567800 | -3.42924800 | -0.23797700 |
| H | 0  | -3.01488800 | -3.89889500 | 1.04633400  |
| H | 0  | -2.63437300 | -0.99650700 | 0.19922200  |
| H | 0  | -3.94807900 | -1.64879200 | 1.15785400  |
| H | 0  | -0.94430400 | -3.52093600 | 2.03083800  |
| H | 0  | -4.49759200 | -4.07845300 | -0.79222700 |
| N | 0  | -1.37140300 | -2.68236300 | 1.64202000  |
| H | 0  | -1.28146900 | -3.66817700 | -5.19033000 |
| H | -1 | 0.13490300  | -5.43401700 | -4.10567500 |
| O | -1 | 3.53411800  | -4.40038600 | -1.05286300 |
| H | 0  | 4.43454600  | -4.51028700 | -0.72797300 |
| H | -1 | 7.33078300  | -1.28738400 | -0.36433600 |
| H | 0  | -4.24365700 | 1.93988700  | 2.29088900  |
| H | 0  | -3.60177400 | 5.72612500  | -0.66218700 |

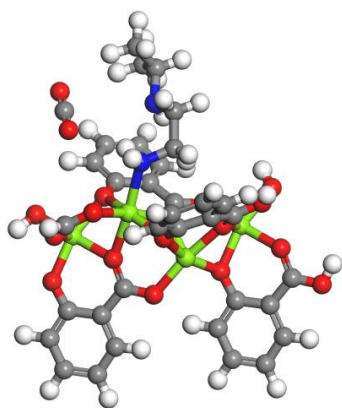

Mg-(B) Complex



-1 1

|    |    |             |             |             |
|----|----|-------------|-------------|-------------|
| H  | 0  | -8.22030100 | 0.15414200  | -1.42926100 |
| Mg | -1 | -1.92772600 | -2.36542300 | -1.57547500 |
| O  | -1 | -1.37812500 | -4.23139400 | -2.01380400 |
| O  | -1 | -3.00920000 | -0.69462500 | -1.20426100 |
| O  | -1 | -3.63644300 | -3.35285000 | -1.02244900 |
| O  | -1 | -5.79277100 | -3.92516400 | -1.02495400 |
| O  | -1 | -1.57617600 | -2.19470800 | 0.42106400  |
| O  | -1 | -1.73624800 | -4.26464000 | 1.22336600  |
| H  | 0  | -0.56002300 | -4.20042300 | -2.52208100 |
| C  | -1 | -4.33903000 | -0.52691100 | -1.28613800 |
| C  | -1 | -5.27521700 | -1.60666200 | -1.23002500 |
| C  | -1 | -6.65218000 | -1.32941400 | -1.27689100 |
| C  | -1 | -7.15343000 | -0.03517400 | -1.39938900 |
| C  | -1 | -6.21839400 | 1.01699800  | -1.49285700 |
| C  | -1 | -4.88547300 | -3.03172200 | -1.07919400 |
| C  | -1 | -0.97743700 | -3.46708500 | 3.76941200  |
| C  | -1 | -1.49894300 | -3.03334500 | 1.40232200  |
| H  | 0  | -0.39955600 | -3.88079800 | 5.81338600  |
| C  | 0  | 5.72061400  | -2.59078400 | -2.33888100 |
| H  | -1 | -7.33094400 | -2.17690000 | -1.17602900 |
| H  | -1 | -1.23366700 | -4.49990800 | 3.52939300  |
| H  | 0  | 3.48785700  | -2.31472000 | -1.28851100 |
| H  | 0  | 4.96273700  | -4.28526500 | -1.27071000 |
| H  | 0  | 4.91321700  | -2.56840100 | -3.07916500 |
| H  | 0  | 6.56069200  | -3.14086200 | -2.77268700 |
| H  | 0  | -4.73501800 | 5.85698900  | 0.08617600  |
| H  | -1 | -6.57814800 | 2.03964100  | -1.62616700 |
| Mg | -1 | 1.55802500  | 3.33637000  | -0.05933500 |
| Mg | -1 | -1.80119500 | -0.15151900 | 0.33345400  |
| Mg | 0  | 1.00416100  | 0.60579600  | 1.04988900  |
| O  | 0  | 2.14035900  | 1.41941100  | -0.48902300 |
| O  | 0  | -0.00968500 | -0.18510000 | -0.61417400 |
| O  | -1 | -0.35454600 | -1.40861200 | -2.42672000 |
| O  | -1 | 0.47660100  | 5.00723100  | 0.31193500  |
| O  | 0  | -0.17084100 | 2.33327200  | 0.51327200  |
| O  | -1 | -2.30698000 | 1.77670400  | 0.49124200  |
| O  | 0  | -0.68102100 | -0.24201900 | 2.02455900  |
| O  | -1 | 1.90952200  | 3.50706500  | 1.93721800  |
| O  | 0  | 1.77520100  | 1.43129200  | 2.81179400  |
| O  | 0  | 5.14744200  | 0.71766200  | 1.15927200  |
| O  | 0  | 6.67897400  | 0.51497500  | -0.58513000 |
| C  | -1 | 2.40468600  | 0.95329000  | -1.69690700 |
| C  | -1 | 1.60592000  | -0.03906200 | -2.35104000 |
| C  | -1 | 1.98954000  | -0.52497000 | -3.61176600 |
| C  | -1 | 3.14528400  | -0.09525000 | -4.25824100 |

|   |    |             |             |             |
|---|----|-------------|-------------|-------------|
| C | -1 | 3.93347200  | 0.87249500  | -3.59770400 |
| C | -1 | 3.57439200  | 1.38541400  | -2.36436900 |
| C | -1 | 0.35499600  | -0.57257300 | -1.77924500 |
| C | -1 | -0.85328900 | 5.17487700  | 0.23002100  |
| C | -1 | -1.78947600 | 4.09512400  | 0.28613900  |
| C | -1 | -3.16639000 | 4.37245600  | 0.23929400  |
| C | -1 | -3.66763900 | 5.66669500  | 0.11679600  |
| C | -1 | -2.73265500 | 6.71878400  | 0.02330500  |
| C | -1 | -4.85445000 | 0.78142500  | -1.43900400 |
| C | -1 | -1.39973500 | 2.67006600  | 0.43695800  |
| C | -1 | -0.67605100 | -1.16973300 | 2.95350600  |
| C | -1 | -1.09256800 | -2.52529700 | 2.73414900  |
| C | -1 | -0.48997600 | -3.13584500 | 5.03195000  |
| C | -1 | -0.13614600 | -1.78630900 | 5.25448600  |
| C | -1 | -0.22755400 | -0.83333600 | 4.25370600  |
| C | -1 | 1.98684500  | 2.66845600  | 2.91849600  |
| C | 0  | 5.90800000  | 0.61136500  | 0.28258600  |
| C | 0  | 2.11035200  | -2.42961400 | 0.87471900  |
| C | 0  | 3.36251600  | -3.21310300 | 0.50984100  |
| C | 0  | 5.26369900  | -3.24496700 | -1.04243600 |
| C | 0  | 6.40227900  | -3.30239700 | -0.03074500 |
| H | -1 | 1.32049300  | -1.24088100 | -4.09087700 |
| H | -1 | 4.19615000  | 2.12886700  | -1.86284500 |
| H | -1 | -3.84520500 | 3.52488700  | 0.34013300  |
| H | -1 | -4.13865500 | 1.60205100  | -1.51223600 |
| H | -1 | 0.21324400  | -1.48692100 | 6.24509400  |
| H | -1 | 0.05618300  | 0.20545600  | 4.43380000  |
| H | 0  | 1.55862400  | -2.95059600 | 1.66138200  |
| H | 0  | 3.06631800  | -4.22859300 | 0.19099900  |
| H | 0  | 1.44567700  | -2.37507300 | 0.00506400  |
| H | 0  | 3.22681200  | -0.74757800 | 0.80761900  |
| H | 0  | 3.98807700  | -3.32966600 | 1.40293600  |
| H | 0  | 2.69398100  | -1.07687300 | 2.29861100  |
| H | 0  | 6.03963400  | -1.55999200 | -2.15502400 |
| H | 0  | 7.23741400  | -3.88143400 | -0.43679800 |
| H | 0  | 6.09943900  | -3.77680400 | 0.90709800  |
| H | 0  | 6.76422800  | -2.29416200 | 0.19602100  |
| N | 0  | 2.40190400  | -1.05838000 | 1.32424300  |
| N | 0  | 4.11877600  | -2.49798700 | -0.50989300 |
| H | 0  | 3.42664000  | -0.48461900 | -5.23031800 |
| H | -1 | 4.86151100  | 1.21022500  | -4.06437300 |
| H | -1 | -3.09235800 | 7.74151000  | -0.10998200 |
| O | -1 | 3.13119400  | 4.29317500  | -0.91055600 |
| H | 0  | 3.05012200  | 5.16651100  | -0.51219800 |
| C | -1 | -1.36866000 | 6.48329500  | 0.07718000  |
| H | 0  | 2.24296900  | 3.06946900  | 3.91176900  |

|   |    |             |             |             |
|---|----|-------------|-------------|-------------|
| H | -1 | -0.65291400 | 7.30383800  | 0.00392700  |
| H | 0  | -1.61158600 | -4.79588600 | 2.01976000  |
| H | 0  | -5.36304900 | -4.79192000 | -0.93818000 |

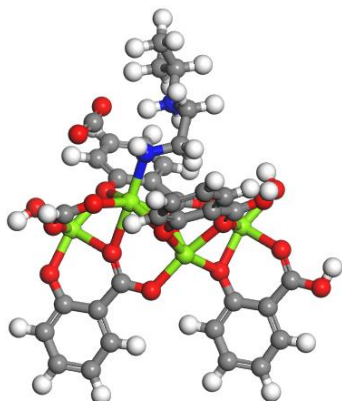

Mg-(C) TS<sub>1</sub>

-1 1

|    |             |             |             |
|----|-------------|-------------|-------------|
| H  | -8.12610400 | -0.48496100 | -1.37963300 |
| Mg | -1.65223600 | -2.49504700 | -1.50131400 |
| O  | -0.95670800 | -4.32263600 | -1.89144200 |
| O  | -2.86256600 | -0.90647800 | -1.16897300 |
| O  | -3.27332100 | -3.60018900 | -0.90859400 |
| O  | -5.37668900 | -4.34336000 | -0.87949600 |
| O  | -1.30556200 | -2.24013900 | 0.48708400  |
| O  | -1.29481900 | -4.29264900 | 1.34791100  |
| H  | -0.14657500 | -4.23597000 | -2.40615700 |
| C  | -4.20197100 | -0.84828400 | -1.24583800 |
| C  | -5.04809700 | -1.99758200 | -1.15286000 |
| C  | -6.44310000 | -1.83304900 | -1.19743900 |
| C  | -7.04730900 | -0.58715300 | -1.35232000 |
| C  | -6.20030200 | 0.53351200  | -1.48186200 |
| C  | -4.54438000 | -3.38196000 | -0.96520100 |
| C  | -0.58981900 | -3.36493800 | 3.86516400  |
| C  | -1.15631000 | -3.04171500 | 1.49075200  |
| H  | 0.02915900  | -3.67290800 | 5.91582100  |
| C  | 5.59537900  | -2.29070300 | -2.63405900 |
| H  | -7.05107400 | -2.72901700 | -1.06807200 |
| H  | -0.76344600 | -4.42136800 | 3.65589100  |
| H  | 3.28275300  | -2.29686900 | -1.47259700 |
| H  | 4.85022000  | -4.06998400 | -1.67614000 |
| H  | 4.76221700  | -2.18937300 | -3.33531500 |
| H  | 6.40686600  | -2.81413100 | -3.14485600 |
| H  | -5.10274800 | 5.52036300  | -0.04974500 |
| H  | -6.64171000 | 1.51983100  | -1.64100900 |
| Mg | 1.37171200  | 3.50852100  | -0.16999700 |
| Mg | -1.69445000 | -0.22485800 | 0.34421500  |
| Mg | 1.17373600  | 0.66609300  | 1.03371500  |
| O  | 2.09960100  | 1.64593500  | -0.56358900 |

|   |             |             |             |
|---|-------------|-------------|-------------|
| O | 0.08704000  | -0.13345000 | -0.62192800 |
| O | -0.16528600 | -1.43973300 | -2.39029300 |
| O | 0.16142700  | 5.09717700  | 0.16236300  |
| O | -0.27159900 | 2.38606800  | 0.43026900  |
| O | -2.35269600 | 1.66029600  | 0.45184000  |
| O | -0.57576300 | -0.17937000 | 2.03454200  |
| O | 1.71838600  | 3.76342900  | 1.81840000  |
| O | 1.69307900  | 1.72027400  | 2.77999600  |
| O | 4.50212100  | 1.12031800  | 1.97882800  |
| O | 5.16415800  | 0.08743600  | 0.00475000  |
| C | 2.39891000  | 1.15547300  | -1.74663800 |
| C | 1.67917700  | 0.08415700  | -2.36704300 |
| C | 2.09428600  | -0.40499600 | -3.61648800 |
| C | 3.20853500  | 0.09747000  | -4.28305500 |
| C | 3.91968600  | 1.14367500  | -3.65551600 |
| C | 3.52672600  | 1.66091800  | -2.43429000 |
| C | 0.47803300  | -0.53148200 | -1.77153600 |
| C | -1.17802200 | 5.15528400  | 0.08547800  |
| C | -2.02414800 | 4.00598600  | 0.17845700  |
| C | -3.41910700 | 4.17060700  | 0.13389700  |
| C | -4.02331600 | 5.41650200  | -0.02098400 |
| C | -3.17635400 | 6.53708000  | -0.15054600 |
| C | -4.82158900 | 0.40965800  | -1.43136500 |
| C | -1.52043200 | 2.62160800  | 0.36611600  |
| C | -0.47804900 | -1.07488400 | 2.98337700  |
| C | -0.78540600 | -2.46515500 | 2.80491500  |
| C | -0.12424200 | -2.96001000 | 5.11440800  |
| C | 0.12113800  | -1.58068600 | 5.29667000  |
| C | -0.05153300 | -0.66688000 | 4.27040800  |
| C | 1.86763900  | 2.96185300  | 2.82206900  |
| C | 4.68973900  | 0.51541100  | 0.99758600  |
| C | 2.24698000  | -2.20694800 | 0.93137500  |
| C | 3.41293100  | -3.06001800 | 0.43266600  |
| C | 5.20208500  | -3.07294000 | -1.39212800 |
| C | 6.34510600  | -3.18977700 | -0.39783500 |
| H | 1.48252900  | -1.18553800 | -4.07059000 |
| H | 4.08932900  | 2.46571000  | -1.95833500 |
| H | -4.02712600 | 3.27455100  | 0.26324500  |
| H | -4.17440800 | 1.28261500  | -1.53263400 |
| H | 0.45029100  | -1.22627600 | 6.27598700  |
| H | 0.14873000  | 0.39600400  | 4.41941500  |
| H | 1.80243200  | -2.77844000 | 1.76298300  |
| H | 3.10974100  | -4.06993400 | 0.14054000  |
| H | 1.48031900  | -2.20852100 | 0.14142300  |
| H | 4.25114400  | -1.43684200 | -0.47421000 |
| H | 4.19282400  | -3.12249100 | 1.19382000  |

|   |             |             |             |
|---|-------------|-------------|-------------|
| H | 2.93275700  | -0.86126500 | 2.24122200  |
| H | 5.94711400  | -1.28831400 | -2.37134300 |
| H | 7.21205700  | -3.60809300 | -0.91473200 |
| H | 6.11040500  | -3.85199000 | 0.43803700  |
| H | 6.62683400  | -2.20761100 | -0.00626200 |
| N | 2.60651800  | -0.84661900 | 1.27717000  |
| N | 4.01208600  | -2.40189100 | -0.76123700 |
| H | 3.51410100  | -0.29444800 | -5.24699400 |
| H | 4.81528800  | 1.54129100  | -4.13810600 |
| H | -3.61771700 | 7.52348600  | -0.30967300 |
| O | 2.85866300  | 4.56383500  | -1.05897600 |
| H | 2.71708700  | 5.43595400  | -0.67512000 |
| C | -1.79759700 | 6.41331400  | -0.10002900 |
| H | 2.14318000  | 3.41531700  | 3.78926900  |
| H | -1.15045900 | 7.28618300  | -0.20131700 |
| H | -1.12040700 | -4.78792100 | 2.15799100  |
| H | -4.87831100 | -5.17018300 | -0.77310700 |

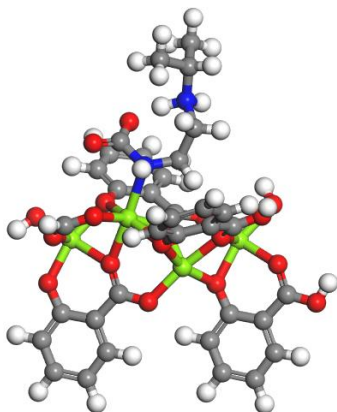

Mg-(D) Intermediate from Gaussian

-1 1

|    |             |             |             |
|----|-------------|-------------|-------------|
| H  | -7.59762900 | -3.21179800 | -0.66010300 |
| Mg | -0.90187200 | -2.76251900 | -1.62497700 |
| O  | 0.33821900  | -4.20796800 | -2.21564700 |
| O  | -2.54226400 | -1.72317500 | -1.05245700 |
| O  | -1.94004900 | -4.39094300 | -0.93868400 |
| O  | -3.62435700 | -5.83949600 | -0.73348300 |
| O  | -0.41876100 | -2.45352600 | 0.32694900  |
| O  | 0.42406300  | -4.38789200 | 1.03533500  |
| H  | 1.00024200  | -3.82573200 | -2.80232300 |
| C  | -3.81432900 | -2.14716400 | -0.97908400 |
| C  | -4.18167300 | -3.52550100 | -0.87562400 |
| C  | -5.53870700 | -3.87106800 | -0.75673300 |
| C  | -6.55792800 | -2.92106700 | -0.75723800 |
| C  | -6.18429500 | -1.56815300 | -0.89906100 |
| C  | -3.20263000 | -4.64163500 | -0.84141700 |
| C  | 1.06900800  | -3.33674900 | 3.51996400  |
| C  | 0.12933900  | -3.17479600 | 1.24971900  |

|    |             |             |             |
|----|-------------|-------------|-------------|
| H  | 2.01215800  | -3.45660800 | 5.46381100  |
| C  | 7.38140800  | -1.73253700 | -1.65487900 |
| H  | -5.76999800 | -4.92859000 | -0.62528300 |
| H  | 1.25416300  | -4.37917100 | 3.25717100  |
| H  | 4.90249500  | -1.91001300 | -1.51213000 |
| H  | 6.61753600  | -2.85065300 | 0.01715800  |
| H  | 6.98052300  | -2.41915000 | -2.40701100 |
| H  | 8.42521900  | -2.00214600 | -1.47848700 |
| H  | -6.74404100 | 3.43975800  | 0.75201600  |
| H  | -6.96156200 | -0.80186500 | -0.93969900 |
| Mg | -0.04730300 | 3.88825400  | -0.21202600 |
| Mg | -1.50819800 | -0.70871500 | 0.36895800  |
| Mg | 0.78211100  | 1.21955300  | 0.79972700  |
| O  | 1.24494200  | 2.41369200  | -0.80044000 |
| O  | 0.00661600  | 0.03049400  | -0.76457300 |
| O  | -0.00797100 | -1.22076900 | -2.59396500 |
| O  | -1.68768100 | 4.92769500  | 0.36051400  |
| O  | -1.09514600 | 2.23633400  | 0.48627200  |
| O  | -2.76977500 | 0.81137500  | 0.67948700  |
| O  | -0.23004800 | -0.30130800 | 1.90349100  |
| O  | 0.43580800  | 4.19724700  | 1.73989800  |
| O  | 1.24002800  | 2.24971600  | 2.54618100  |
| O  | 4.05026800  | 2.18469900  | 1.24882900  |
| O  | 4.50881900  | 0.97205800  | -0.58637700 |
| C  | 1.53548900  | 2.10318300  | -2.05215200 |
| C  | 1.16755500  | 0.86202000  | -2.66434100 |
| C  | 1.56684600  | 0.58788300  | -3.98271700 |
| C  | 2.33834000  | 1.47416200  | -4.72947100 |
| C  | 2.70807700  | 2.68862500  | -4.11103700 |
| C  | 2.31584200  | 2.99767100  | -2.82107900 |
| C  | 0.34642300  | -0.15912200 | -1.98655300 |
| C  | -2.95975900 | 4.50360900  | 0.43386500  |
| C  | -3.32710300 | 3.12527200  | 0.53732700  |
| C  | -4.68412400 | 2.77980200  | 0.65623700  |
| C  | -5.70334500 | 3.72980200  | 0.65573200  |
| C  | -5.32972600 | 5.08261900  | 0.51388900  |
| C  | -4.85596300 | -1.19062900 | -1.00745800 |
| C  | -2.34806100 | 2.00913800  | 0.57153300  |
| C  | 0.25333500  | -1.13623400 | 2.79415500  |
| C  | 0.43615100  | -2.53894600 | 2.55301400  |
| C  | 1.51591600  | -2.82535900 | 4.73655500  |
| C  | 1.27998100  | -1.45519100 | 4.98742900  |
| C  | 0.66772400  | -0.63699300 | 4.05267400  |
| C  | 0.98391000  | 3.47597700  | 2.66266900  |
| C  | 3.89922300  | 1.22154000  | 0.50008700  |
| C  | 2.89887900  | -1.06652300 | 0.25136700  |

|   |             |             |             |
|---|-------------|-------------|-------------|
| C | 4.18180400  | -1.88031800 | 0.40788300  |
| C | 6.60771700  | -1.81796200 | -0.34929200 |
| C | 7.16501900  | -0.88109300 | 0.71045300  |
| H | 1.21750600  | -0.34768500 | -4.42132300 |
| H | 2.61382200  | 3.93765400  | -2.35376000 |
| H | -4.91542800 | 1.72218300  | 0.78766700  |
| H | -4.57665100 | -0.14127000 | -1.11692100 |
| H | 1.58406700  | -1.03264400 | 5.94763500  |
| H | 0.49736300  | 0.42261500  | 4.25326600  |
| H | 2.07534000  | -1.64227200 | 0.67030100  |
| H | 3.98088700  | -2.94857100 | 0.29956500  |
| H | 2.67698100  | -0.93219000 | -0.81091600 |
| H | 5.00945500  | -0.39855100 | -0.73140700 |
| H | 4.62506400  | -1.71764500 | 1.39253400  |
| H | 2.90938500  | 0.16740300  | 1.91072300  |
| H | 7.35736300  | -0.71561900 | -2.05972100 |
| H | 8.21304600  | -1.13063700 | 0.89168700  |
| H | 6.63900100  | -0.96502400 | 1.66493800  |
| H | 7.11031000  | 0.15835500  | 0.37314500  |
| N | 2.87588100  | 0.24942800  | 0.89592600  |
| N | 5.17508000  | -1.48014100 | -0.62721900 |
| H | 2.64133800  | 1.24215300  | -5.74445800 |
| H | 3.33711600  | 3.39373500  | -4.65896500 |
| H | -6.10697900 | 5.84900500  | 0.47327100  |
| O | 0.84660000  | 5.43000400  | -1.18101500 |
| H | 0.45237000  | 6.18322400  | -0.72785200 |
| C | -4.00138200 | 5.46024100  | 0.40551200  |
| H | 1.21580300  | 3.96636800  | 3.62119300  |
| H | -3.72208000 | 6.50950300  | 0.29603000  |
| H | 0.86151800  | -4.81531500 | 1.78216900  |
| H | -2.85751100 | -6.43561100 | -0.73914600 |

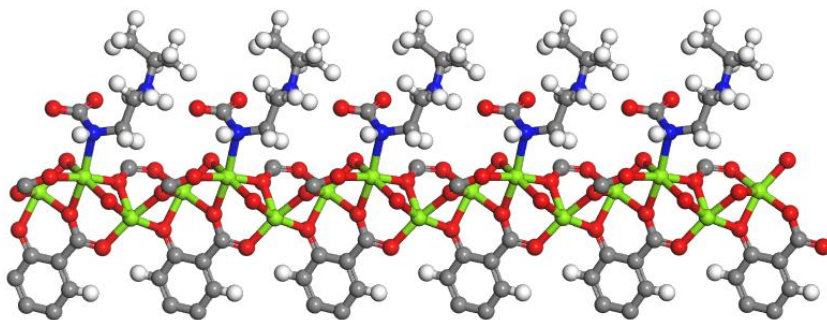

Mg-(D) Intermediate from VASP

|                      |                     |                     |    |   |
|----------------------|---------------------|---------------------|----|---|
| 1.0000000000000000   |                     |                     |    |   |
| 21.0476695362586987  | 0.0491017592296864  | -0.0068694040001665 |    |   |
| -11.1461244444117948 | 18.9541268806971992 | -0.0017973564321513 |    |   |
| -0.0077031221928303  | -0.0070130703636088 | 6.8527281014786174  |    |   |
| Mg                   | O                   | C                   | H  | N |
| 6                    | 20                  | 48                  | 32 | 2 |

Direct

|                    |                    |                    |
|--------------------|--------------------|--------------------|
| 0.3302560970950594 | 0.7396333892735925 | 0.8427166265039574 |
| 0.2673890261885248 | 0.6476705564731944 | 0.1821636002087956 |
| 0.3756977810413460 | 0.6840532093574581 | 0.5033764264395089 |
| 0.6940331274420188 | 0.3568998319973815 | 0.2260182154372004 |
| 0.5951682084038978 | 0.2933533648960349 | 0.8924301812255848 |
| 0.6279966079005064 | 0.3875620014653052 | 0.5589527741514857 |
| 0.4099748082367114 | 0.7799619025051285 | 0.6432018936303550 |
| 0.3565566461790013 | 0.7362480460077876 | 0.2814483148197908 |
| 0.3810528191411962 | 0.8156551958747542 | 0.0485034168317213 |
| 0.2310881094216342 | 0.6895148590591376 | 0.9767951330771680 |
| 0.2750099767651903 | 0.6739952885581388 | 0.6135185859352035 |
| 0.1890397849828318 | 0.6211625973896702 | 0.3834440097435703 |
| 0.3175711130261547 | 0.6003269378683456 | 0.3101578247742793 |
| 0.3347746745610749 | 0.6561253441258970 | 0.9539211310102900 |
| 0.3820769797601287 | 0.6219829729869915 | 0.7167823721997806 |
| 0.5551274752973399 | 0.7650733759481483 | 0.7082527934860963 |
| 0.5711738778271780 | 0.8317756528797915 | 0.4385338552991200 |
| 0.7282926253604955 | 0.4348344706283953 | 0.4273668189822430 |
| 0.6863900520582789 | 0.3800489050642071 | 0.7882473095141478 |
| 0.7712917097904253 | 0.4084117608645741 | 0.0197138164713309 |
| 0.6423393722221888 | 0.2607749396325971 | 0.0936295777301765 |
| 0.6267216478143212 | 0.3006512463081208 | 0.4541892160385501 |
| 0.5708572016975069 | 0.2195048815413756 | 0.6853098934605839 |
| 0.5462134507217584 | 0.3425431424438656 | 0.7598170316988515 |
| 0.6037091067232154 | 0.3573680089754703 | 0.1214329173834017 |
| 0.5758387969374397 | 0.4115759746227354 | 0.3518838796037542 |
| 0.4428724535633535 | 0.8444236457545102 | 0.5639693306970486 |
| 0.4352261225127023 | 0.8575010309766071 | 0.3630608272166853 |
| 0.4715659114719060 | 0.9268875764550799 | 0.2920883648255526 |
| 0.5165932177798211 | 0.9846121252621103 | 0.4094474056783213 |
| 0.5244010174474525 | 0.9710529779810457 | 0.6068083321662954 |
| 0.4885632672353211 | 0.9034591436955637 | 0.6819995890592239 |
| 0.3888730533121176 | 0.8011348701930459 | 0.2236056867117853 |
| 0.1638218122069688 | 0.6589091541602627 | 0.8954536003322104 |
| 0.1495076638326722 | 0.6360923378747003 | 0.6965832751466436 |
| 0.0768208107018182 | 0.6023075418148665 | 0.6261642963448892 |
| 0.0174222482992334 | 0.5909134739078539 | 0.7418695719036279 |
| 0.0325915865727282 | 0.6155118296888062 | 0.9361013793613040 |
| 0.1034711094954801 | 0.6485062940456601 | 0.0108439815223491 |
| 0.2071844831525524 | 0.6437771137406756 | 0.5576260125931043 |
| 0.3394063628022010 | 0.5590735519486856 | 0.2268421803261518 |
| 0.3583812420767529 | 0.5630645271010835 | 0.0243462324944659 |
| 0.3863239380687773 | 0.5214629940576856 | 0.9520422298970530 |
| 0.3954814037748449 | 0.4746570132276346 | 0.0691918273236070 |
| 0.3737045456650208 | 0.4689467295124956 | 0.2663936847996951 |



|                    |                    |                    |
|--------------------|--------------------|--------------------|
| 0.3464388251840091 | 0.5095249127386978 | 0.3429317679875297 |
| 0.3582460045601152 | 0.6157031346508575 | 0.8895584297586296 |
| 0.5448606139888454 | 0.7747501557503682 | 0.5326323451936332 |
| 0.5049069178346741 | 0.7045045259094920 | 0.2155065050725966 |
| 0.5837711853783034 | 0.7465883979381118 | 0.1367380041166086 |
| 0.7953633746589688 | 0.4723794590325383 | 0.5094391685062618 |
| 0.8106953963579571 | 0.4651760122383095 | 0.7091489647608356 |
| 0.8831620702664864 | 0.5046931794974441 | 0.7801379284995562 |
| 0.9414872476442966 | 0.5523891794005635 | 0.6643380606036899 |
| 0.9252667536645305 | 0.5604916122946761 | 0.4694552751832362 |
| 0.8546337240390045 | 0.5218335911753442 | 0.3941312244919501 |
| 0.7541897154314583 | 0.4156605710632775 | 0.8465312065030943 |
| 0.6146310801305006 | 0.1967547515818993 | 0.1759036655805204 |
| 0.5912224678513809 | 0.1819711405315445 | 0.3751201548040939 |
| 0.5599979309775875 | 0.1127691842122189 | 0.4461428094967701 |
| 0.5522313412840845 | 0.0570890723490578 | 0.3313898842695124 |
| 0.5777879127090202 | 0.0728224999785425 | 0.1372615461080358 |
| 0.6078189663260289 | 0.1402450581447710 | 0.0615542725956075 |
| 0.5958149198955880 | 0.2358672389057972 | 0.5124048173915625 |
| 0.5090606352905311 | 0.3710636508668514 | 0.8407228417201225 |
| 0.5176916465132990 | 0.3938166692954823 | 0.0398343180546163 |
| 0.4792302447807018 | 0.4262721617909193 | 0.1090761369416242 |
| 0.4309710866600653 | 0.4362615060538673 | 0.9926107095431931 |
| 0.4207353663131457 | 0.4112129690575372 | 0.7988090445727423 |
| 0.4584732918712291 | 0.3797255841922791 | 0.7249839654899830 |
| 0.5680203028036885 | 0.3878105850416702 | 0.1786494062873274 |
| 0.6763973368760148 | 0.8717569249687429 | 0.0176437548090576 |
| 0.6736228438957781 | 0.9347367951626495 | 0.9336118073291360 |
| 0.7281604432230324 | 0.8912802482996582 | 0.1922189386174651 |
| 0.4616849545128545 | 0.9342914489278797 | 0.1399835327087260 |
| 0.5605700003482852 | 0.0150154168425374 | 0.7018422461648726 |
| 0.4953611607121786 | 0.8937337666023240 | 0.8346273397400452 |
| 0.0680291746024864 | 0.5832110131162977 | 0.4760670665621802 |
| 0.9875059564002129 | 0.6091120758082269 | 0.0290577911161733 |
| 0.1146672842054812 | 0.6673654521733496 | 0.1613171061933585 |
| 0.4039345843523279 | 0.5294104968694313 | 0.7999568587846113 |
| 0.3782229652930127 | 0.4312539764140695 | 0.3606246487082174 |
| 0.3301844904290760 | 0.5050159231448248 | 0.4958567752879333 |
| 0.4834220632152864 | 0.6486093906423207 | 0.1840794663557261 |
| 0.5899949764918944 | 0.7202732820296447 | 0.0084402531366834 |
| 0.8927648418298801 | 0.4952709644222679 | 0.9306698627733994 |
| 0.9694543039969616 | 0.5987116481385044 | 0.3761826748576027 |
| 0.8429448327565296 | 0.5285897172935563 | 0.2429996427946790 |
| 0.5399584241183604 | 0.1035916663038634 | 0.5960676432051031 |
| 0.5742966353455685 | 0.0308289944759466 | 0.0444496867767441 |
| 0.6271565239570620 | 0.1514881500860810 | 0.9109534670614394 |

|                    |                    |                    |
|--------------------|--------------------|--------------------|
| 0.4902596514668645 | 0.4455592836296418 | 0.2590305960964301 |
| 0.3815496206946563 | 0.4161610648466336 | 0.7051503304907101 |
| 0.4500645554215268 | 0.3607248694273935 | 0.5746766468247912 |
| 0.4699853005680268 | 0.7192010606535177 | 0.1313310240784418 |
| 0.5678999695333715 | 0.8082382293817147 | 0.9430168735513149 |
| 0.5811821342953394 | 0.8353938147381612 | 0.1936276171510940 |
| 0.6240230031911409 | 0.7532272805842695 | 0.2487513706885736 |
| 0.4924471583055805 | 0.6687933960482582 | 0.5018209054626297 |
| 0.6920334838064619 | 0.8471676527789782 | 0.9014930926434133 |
| 0.6545079767866966 | 0.9580856582712514 | 0.0445714876704599 |
| 0.6370419921857433 | 0.9191790300253686 | 0.8058045967428598 |
| 0.7288816454322244 | 0.9754900317726012 | 0.8873326977939584 |
| 0.7832615045387072 | 0.9333571816411279 | 0.1493796074030342 |
| 0.7334144185988407 | 0.8468030408222162 | 0.2442639374945585 |
| 0.7089046930780611 | 0.9101940769697165 | 0.3144733938460860 |
| 0.4939533908388327 | 0.7096713094651719 | 0.4267892370987880 |
| 0.5986434397129727 | 0.8175568333832146 | 0.0719783163894192 |

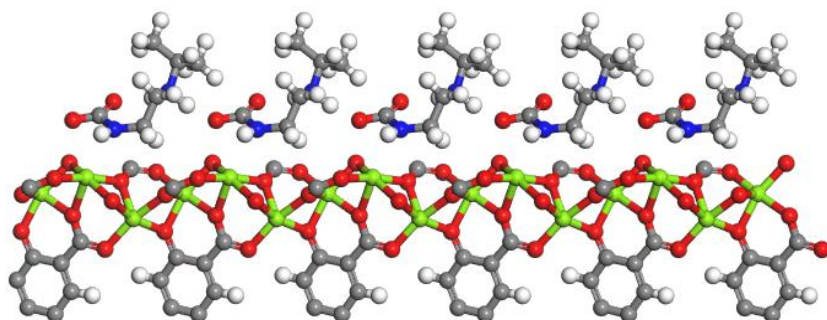

Mg-(E) TS<sub>2</sub>

|                      |                     |                    |    |   |
|----------------------|---------------------|--------------------|----|---|
| 1.0000000000000000   |                     |                    |    |   |
| 20.8836654072324563  | 0.0000000000000000  | 0.0000000000000000 |    |   |
| -11.0656286981616852 | 19.0481951537016165 | 0.0000000000000000 |    |   |
| -0.0561760244874965  | -0.0121684410423750 | 6.8358409434808918 |    |   |
| Mg                   | O                   | C                  | H  | N |
| 6                    | 20                  | 48                 | 32 | 2 |

Direct

|                    |                    |                    |
|--------------------|--------------------|--------------------|
| 0.3319032730250293 | 0.7423269759843544 | 0.8398992584102880 |
| 0.2709283132207631 | 0.6512783731953846 | 0.1803133235179333 |
| 0.3799762030732926 | 0.6874600659137288 | 0.5062543482955941 |
| 0.6935591184754079 | 0.3575565149902414 | 0.2217830773556034 |
| 0.5941219688081039 | 0.2931987657623261 | 0.8868834292630471 |
| 0.6256553636851206 | 0.3867895388039064 | 0.5538844275378075 |
| 0.4111413810153065 | 0.7833922308017052 | 0.6421975588180485 |
| 0.3636367960725833 | 0.7387760148060076 | 0.2770756367930575 |
| 0.3838971583571580 | 0.8176497933434373 | 0.0459845744947510 |
| 0.2331115424320831 | 0.6929116911812065 | 0.9734314311321084 |
| 0.2772756541960635 | 0.6778460953061733 | 0.6074790363560458 |
| 0.1905199515964509 | 0.6240240946300338 | 0.3774240730714776 |
| 0.3220242051576475 | 0.6042328740208553 | 0.3084874831073987 |

|                    |                    |                    |
|--------------------|--------------------|--------------------|
| 0.3351349562489885 | 0.6571898906083804 | 0.9474657946802455 |
| 0.3814944202815638 | 0.6214360409982695 | 0.7112839217654217 |
| 0.5289476736315661 | 0.7532535669349849 | 0.5980162815627921 |
| 0.5738476940522350 | 0.8221096790993210 | 0.3246465851131392 |
| 0.7262258367745540 | 0.4352233041936998 | 0.4228410053723324 |
| 0.6853268624239864 | 0.3809059996003377 | 0.7850604036409417 |
| 0.7715113907954697 | 0.4099584657408367 | 0.0169110452019839 |
| 0.6432288986362332 | 0.2618564956176870 | 0.0888532544330827 |
| 0.6267335144246865 | 0.3009918243702994 | 0.4503718769359621 |
| 0.5704276785538365 | 0.2195988619771669 | 0.6801143675003185 |
| 0.5430120634850489 | 0.3408087890901935 | 0.7524793660086067 |
| 0.6012681627961484 | 0.3560510635894683 | 0.1162807613084380 |
| 0.5722871458149645 | 0.4096987015306363 | 0.3456739082624648 |
| 0.4461267304840466 | 0.8473921682972338 | 0.5624753341499928 |
| 0.4396628562462797 | 0.8601196159721497 | 0.3597794738195953 |
| 0.4757063980404090 | 0.9290039232503711 | 0.2876125699708817 |
| 0.5201087236695869 | 0.9868606187788038 | 0.4053785131877478 |
| 0.5276631875781644 | 0.9737013136627775 | 0.6040342887406461 |
| 0.4917465977607152 | 0.9064727638654523 | 0.6805759482573870 |
| 0.3937925722263120 | 0.8035320630590882 | 0.2204118701705534 |
| 0.1654433678006600 | 0.6621445018483895 | 0.8905368668460465 |
| 0.1508511770832257 | 0.6390404196248446 | 0.6912002346456204 |
| 0.0775063271350557 | 0.6049358034284492 | 0.6205324067592660 |
| 0.0177824948765643 | 0.5934963068704466 | 0.7361260923981545 |
| 0.0333391354144822 | 0.6186999470697289 | 0.9302212934279760 |
| 0.1047920582231014 | 0.6519897469875906 | 0.0051996425470361 |
| 0.2088267419673583 | 0.6469279725169216 | 0.5519591818816645 |
| 0.3405245662072737 | 0.5608156714255548 | 0.2236952114378659 |
| 0.3556546014976359 | 0.5621393845252937 | 0.0187855714531414 |
| 0.3806589697328782 | 0.5183896762174031 | 0.9444170212739064 |
| 0.3905039782769177 | 0.4719189675125954 | 0.0616089109660970 |
| 0.3716122710553342 | 0.4682662838370001 | 0.2612203922593432 |
| 0.3473164033270572 | 0.5109220206301369 | 0.3396656302506744 |
| 0.3569351327906265 | 0.6154004307017915 | 0.8836033274868841 |
| 0.5406785013323435 | 0.7640068763976033 | 0.4138495571349985 |
| 0.5162096356633572 | 0.7001632390716198 | 0.0913255641847495 |
| 0.5938563764163600 | 0.7462193069444424 | 0.0057371430760249 |
| 0.7937550862825322 | 0.4733774631130441 | 0.5051445732366801 |
| 0.8099689427151828 | 0.4665177901843077 | 0.7053317935018736 |
| 0.8830940578483250 | 0.5065588560454656 | 0.7758519141305513 |
| 0.9410849619584311 | 0.5544096436696676 | 0.6592338004534880 |
| 0.9238143625247544 | 0.5622623162049173 | 0.4641420369766427 |
| 0.8525850235223600 | 0.5231101271005262 | 0.3892782484310980 |
| 0.7537105989339639 | 0.4169179685121674 | 0.8431839789350118 |
| 0.6161535848617340 | 0.1981036597078718 | 0.1712015652978962 |
| 0.5922899294655676 | 0.1830370268659159 | 0.3702340487443789 |

|                    |                    |                    |
|--------------------|--------------------|--------------------|
| 0.5616836714101836 | 0.1141262786285354 | 0.4411573517697865 |
| 0.5551242530859141 | 0.0589971199390311 | 0.3268454243036106 |
| 0.5811517713801939 | 0.0750174734495408 | 0.1329519834287973 |
| 0.6104778181011558 | 0.1421546457421777 | 0.0571859203767465 |
| 0.5959589697135852 | 0.2363280680400646 | 0.5075918092767517 |
| 0.5048931371118373 | 0.3686234906409542 | 0.8328237507618081 |
| 0.5135722964940831 | 0.3913154022937393 | 0.0322831855806474 |
| 0.4745140001936029 | 0.4233423419027960 | 0.1011510307889371 |
| 0.4253716154689198 | 0.4329421458550316 | 0.9843627877920931 |
| 0.4148402054994985 | 0.4077571125086935 | 0.7902268741144489 |
| 0.4532649613225373 | 0.3767038726291638 | 0.7166491093301794 |
| 0.5646823794877973 | 0.3859127813003428 | 0.1722495289930702 |
| 0.6778235633079093 | 0.8698425664718145 | 0.8752970931103327 |
| 0.6705698350579273 | 0.9252641151371276 | 0.7586364295008703 |
| 0.7290870938070618 | 0.9003508045719965 | 0.0526601970427079 |
| 0.4661331906323571 | 0.9359545182523775 | 0.1341591891986089 |
| 0.5635431398917056 | 0.0178148230483108 | 0.6992557536680382 |
| 0.4978318742400555 | 0.8973157527470602 | 0.8348918170580323 |
| 0.0684848642988790 | 0.5856704971285867 | 0.4702412955261531 |
| 0.9880540880884612 | 0.6125056048692501 | 0.0227483140153742 |
| 0.1163533661276512 | 0.6713021009858151 | 0.1555695176744603 |
| 0.3962476483536133 | 0.5249647053619703 | 0.7905605826328759 |
| 0.3763065562829282 | 0.4306251770536099 | 0.3557263245299425 |
| 0.3333398213324548 | 0.5079769526805954 | 0.4942691295310223 |
| 0.4960995913372139 | 0.6454981326901698 | 0.0500776133603808 |
| 0.6015761270988321 | 0.7207366341753227 | 0.8778916338372810 |
| 0.8935811581838116 | 0.4974761075204057 | 0.9266555666729687 |
| 0.9676503345277447 | 0.6006389225205530 | 0.3704237188885803 |
| 0.8400089211477626 | 0.5295418887675328 | 0.2379386209799322 |
| 0.5411413590783986 | 0.1046848777916881 | 0.5907617866743301 |
| 0.5786249023456236 | 0.0334865288704342 | 0.0405107157768553 |
| 0.6301798043954333 | 0.1536309095774833 | 0.9067607446800329 |
| 0.4859754096609618 | 0.4428056176671177 | 0.2512662547804974 |
| 0.3750266957842617 | 0.4123770182337479 | 0.6958950547080830 |
| 0.4446182477356485 | 0.3577041188268151 | 0.5659980730994122 |
| 0.4787237804013089 | 0.7150928262214918 | 0.0189831223614035 |
| 0.5666600398371977 | 0.8009684736108248 | 0.8105360501656054 |
| 0.5836773157595623 | 0.8309983450062711 | 0.0574485171767331 |
| 0.6370681241349255 | 0.7573884322679884 | 0.1149499827516688 |
| 0.4988556942050517 | 0.6579185875282330 | 0.3775647013864432 |
| 0.6975196569229598 | 0.8429521774960562 | 0.7778243673723731 |
| 0.6503709507901977 | 0.9526233136281470 | 0.8520305164842137 |
| 0.6326863861173700 | 0.9019314618233280 | 0.6331552897767267 |
| 0.7251093011958519 | 0.9645772648152141 | 0.7030698601957960 |
| 0.7841901299585451 | 0.9407880716831786 | 0.0036151237812564 |
| 0.7355292166712931 | 0.8607169823365048 | 0.1340877446826229 |

|                    |                    |                    |
|--------------------|--------------------|--------------------|
| 0.7079567375648174 | 0.9246767839651667 | 0.1544002094660917 |
| 0.5085336918384084 | 0.7015292185128091 | 0.3023565586207430 |
| 0.6014227510223177 | 0.8139718366598547 | 0.9364351034893720 |

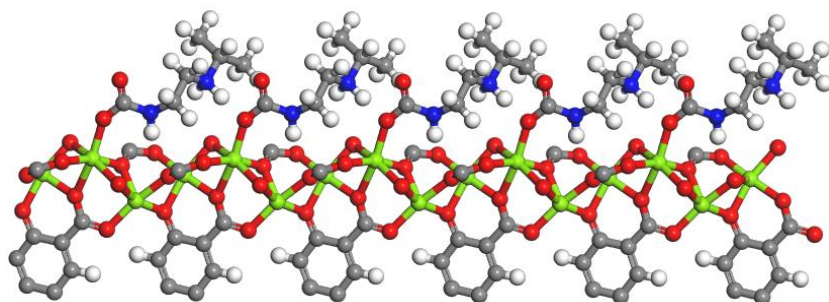

Mg-(F) Product

1.00000000000000

|                      |                     |                    |
|----------------------|---------------------|--------------------|
| 20.6155779842898106  | -0.2232575360820054 | 0.0904183710540717 |
| -11.2954971212902411 | 19.1102665748759826 | 0.0140227017691462 |
| -0.0536647964826460  | -0.0066695584457494 | 6.8433109323161103 |

|    |    |    |    |   |
|----|----|----|----|---|
| Mg | O  | C  | H  | N |
| 6  | 20 | 48 | 32 | 2 |

Direct

|                    |                    |                    |
|--------------------|--------------------|--------------------|
| 0.3427948848108926 | 0.7464173943161825 | 0.8215811960446118 |
| 0.2734714221635670 | 0.6556341147395557 | 0.1640275978908150 |
| 0.3891845962600371 | 0.6887825707381765 | 0.4752375130222575 |
| 0.6906639976197297 | 0.3604170690847894 | 0.2183212143246536 |
| 0.5895380612893817 | 0.2922225156322469 | 0.8846079221983629 |
| 0.6192409717387761 | 0.3853082449314726 | 0.5508042517669480 |
| 0.4286760832595533 | 0.7847687365030609 | 0.6279070834053115 |
| 0.3676201663108785 | 0.7428632026180964 | 0.2628620952572760 |
| 0.4002194210766987 | 0.8229896653802200 | 0.0278913193094823 |
| 0.2413360562286542 | 0.7012820122575079 | 0.9580178289646497 |
| 0.2844827288444591 | 0.6847168408458728 | 0.5913550801153562 |
| 0.1940494238182850 | 0.6317692272467923 | 0.3653072577588858 |
| 0.3208628690147748 | 0.6055170158882106 | 0.2887524505252017 |
| 0.3417754981054912 | 0.6617405208536340 | 0.9351509569873144 |
| 0.3817684836317099 | 0.6221764422828215 | 0.6933756129191906 |
| 0.4979205120232280 | 0.7221071751021384 | 0.3986707620303989 |
| 0.6058995880029343 | 0.7313098282054895 | 0.2873037225357180 |
| 0.7224299000387759 | 0.4374602151165021 | 0.4189096562005759 |
| 0.6812307475033563 | 0.3820821027101147 | 0.7810208833370140 |
| 0.7695368102683418 | 0.4147872369057453 | 0.0121118711258674 |
| 0.6422275740484622 | 0.2644917894848007 | 0.0867106313231929 |
| 0.6232572136287260 | 0.3012200351201315 | 0.4479772401565967 |
| 0.5689796756763812 | 0.2189311433408250 | 0.6791493321543740 |
| 0.5348006726895207 | 0.3357311458642087 | 0.7504487433544185 |
| 0.5944071737349006 | 0.3532119453591918 | 0.1139978272665871 |
| 0.5635106116393587 | 0.4051384878589133 | 0.3423117968262375 |
| 0.4601904406990869 | 0.8493143625127288 | 0.5490310357994730 |

|                    |                    |                    |
|--------------------|--------------------|--------------------|
| 0.4527108236496815 | 0.8630725374806545 | 0.3478095258355083 |
| 0.4874103180193501 | 0.9328698253569101 | 0.2811487757094326 |
| 0.5301945787758697 | 0.9909018693359783 | 0.4018002590813836 |
| 0.5380119053413281 | 0.9770128765752659 | 0.5989170436806290 |
| 0.5044121773254133 | 0.9087224537198324 | 0.6700293510126940 |
| 0.4049721325503555 | 0.8073141339682763 | 0.2043698419210713 |
| 0.1718043654926618 | 0.6711462303003088 | 0.8776365704557207 |
| 0.1560590941192785 | 0.6479694565106868 | 0.6792689758145372 |
| 0.0809125135944342 | 0.6139527084747485 | 0.6108190492885512 |
| 0.0204375358442306 | 0.6025475663714559 | 0.7281119975517925 |
| 0.0371348878310158 | 0.6279001075026898 | 0.9215019215330997 |
| 0.1104986927698590 | 0.6613199856599579 | 0.9941923345227082 |
| 0.2143768512438129 | 0.6549584017561401 | 0.5386952890946759 |
| 0.3380250951779331 | 0.5612148335721301 | 0.2056948885669456 |
| 0.3554818252288143 | 0.5633278393831418 | 0.0021218904822646 |
| 0.3792653610111358 | 0.5187158813612882 | 0.9294336803888541 |
| 0.3849436524804446 | 0.4705585620489785 | 0.0479631668035339 |
| 0.3632777532429188 | 0.4660907618179166 | 0.2457336927006395 |
| 0.3404435994390838 | 0.5097010686561845 | 0.3224345690411639 |
| 0.3588355674680415 | 0.6170182377558433 | 0.8675222833080625 |
| 0.5423323877610713 | 0.7236654106491400 | 0.2582485067929952 |
| 0.5474432201771080 | 0.7010470926226233 | 0.9071039083732089 |
| 0.6176542033787484 | 0.7621977004428544 | 0.8124556616064993 |
| 0.7913792863556850 | 0.4776680231320896 | 0.5002954690122081 |
| 0.8080555048985048 | 0.4715889793764916 | 0.7002028374959721 |
| 0.8826987390900527 | 0.5135587499088388 | 0.7702141713636550 |
| 0.9418626622304203 | 0.5624945947791673 | 0.6529073058058401 |
| 0.9241284776385896 | 0.5697152859272521 | 0.4581295602574897 |
| 0.8513525271836713 | 0.5287768049063288 | 0.3839164571913258 |
| 0.7510120768857718 | 0.4206248432342505 | 0.8385597221847050 |
| 0.6181069259034402 | 0.2014732544303683 | 0.1696990690114717 |
| 0.5941016357911835 | 0.1851579618903045 | 0.3692034299010061 |
| 0.5663333211886865 | 0.1165883520464348 | 0.4404210734825043 |
| 0.5629215284988689 | 0.0632997636809733 | 0.3255879143408791 |
| 0.5894689562539597 | 0.0807947907295414 | 0.1316657032266306 |
| 0.6159883851266557 | 0.1474787471601289 | 0.0556927552450333 |
| 0.5947790145439882 | 0.2368776443761789 | 0.5063733955589740 |
| 0.4966372564135781 | 0.3638930324462777 | 0.8293105078307192 |
| 0.5053889031530403 | 0.3870977298524565 | 0.0277580764172285 |
| 0.4669480324587028 | 0.4200704480532096 | 0.0936700474289509 |
| 0.4185615501763849 | 0.4302440528284492 | 0.9743632642529434 |
| 0.4076190105037512 | 0.4043034531987644 | 0.7816485061587031 |
| 0.4452603120224481 | 0.3721147660595960 | 0.7112554961964932 |
| 0.5565701703827415 | 0.3819843543876758 | 0.1689771508927151 |
| 0.6685523881896387 | 0.8641073722197419 | 0.5755602027179805 |
| 0.6452987707053452 | 0.8948534651175422 | 0.4089205595368099 |

|                    |                    |                    |
|--------------------|--------------------|--------------------|
| 0.7197217003848451 | 0.9206923533749958 | 0.7223980332705295 |
| 0.4772427062666793 | 0.9404002404701757 | 0.1290562961108890 |
| 0.5720164065287321 | 0.0210172641427135 | 0.6974831694941628 |
| 0.5101111556280173 | 0.8989996132326965 | 0.8240017907490085 |
| 0.0709838086994168 | 0.5944006074838555 | 0.4611998183195070 |
| 0.9913037379366898 | 0.6215776172767065 | 0.0155959159487367 |
| 0.1228100920366018 | 0.6805361487211954 | 0.1442811051104016 |
| 0.3968202782688337 | 0.5255170327553245 | 0.7767582775710835 |
| 0.3648946807330233 | 0.4272008677172394 | 0.3405311784456870 |
| 0.3247851165087212 | 0.5064904481499255 | 0.4759659390187636 |
| 0.5638061422077740 | 0.6639033217584185 | 0.9603780818558150 |
| 0.6456002076205110 | 0.7415629776537713 | 0.7217191997302805 |
| 0.8934152204129830 | 0.5048908911387855 | 0.9208359786557381 |
| 0.9688938149477835 | 0.6089523339370118 | 0.3639396101627312 |
| 0.8385378921884268 | 0.5348360460568955 | 0.2328136147256075 |
| 0.5453243183934759 | 0.1058563182214769 | 0.5902561175775389 |
| 0.5896535409350392 | 0.0408110356351941 | 0.0394988572039381 |
| 0.6361429930091873 | 0.1602374735839618 | 0.9052761141879557 |
| 0.4786960078722160 | 0.4401934534430936 | 0.2427294717838464 |
| 0.3683122353756545 | 0.4094425953035241 | 0.6856170409568350 |
| 0.4365790721316785 | 0.3528047088173167 | 0.5613576761454979 |
| 0.5031787015084035 | 0.6737428402645307 | 0.7955610733675513 |
| 0.5598473209792587 | 0.7695336923718870 | 0.5668703955372862 |
| 0.5705880662996350 | 0.8240672377940754 | 0.7500604278303484 |
| 0.6571402856486159 | 0.7969325490271544 | 0.9250082796950565 |
| 0.4615891870391877 | 0.7085405131889360 | 0.0570009480059852 |
| 0.6967432600160350 | 0.8379209745158107 | 0.5134999858687692 |
| 0.6194300642284247 | 0.9240061397432413 | 0.4634783588719600 |
| 0.6056489792416357 | 0.8542165433911677 | 0.3076676670793148 |
| 0.6963954976286004 | 0.9318576736173441 | 0.3262289994187810 |
| 0.7684843836629369 | 0.9634995164260900 | 0.6448584776279347 |
| 0.7419060449663490 | 0.9012308272971197 | 0.8362689436034074 |
| 0.6893656278565032 | 0.9435544882799221 | 0.7928034309776422 |
| 0.5161414309408272 | 0.7206597622448854 | 0.0685796848832396 |
| 0.5993605652536189 | 0.8046107039990389 | 0.6763412825311903 |

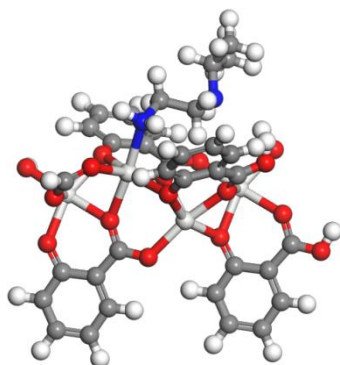

Sc-(A) i-2-MOF

-1 1

|    |    |             |             |             |
|----|----|-------------|-------------|-------------|
| H  | 0  | -1.96086300 | 7.81350600  | -0.87055500 |
| H  | -1 | 0.28892900  | 6.72630400  | -1.19598800 |
| Sc | -1 | -2.81679900 | 0.88617700  | -1.34625300 |
| H  | 0  | -5.97637700 | 3.78603200  | -0.40584000 |
| O  | -1 | -4.69795400 | -0.14646300 | -1.76846600 |
| O  | -1 | -1.41569800 | 2.55628700  | -0.99813400 |
| O  | -1 | -4.21790400 | 2.46446300  | -0.76500300 |
| O  | -1 | -5.24736700 | 4.42330600  | -0.46957200 |
| O  | -1 | -2.37895000 | 0.71278600  | 0.88138600  |
| O  | -1 | -4.33798000 | 0.06351200  | 1.73625800  |
| H  | 0  | -4.46826800 | -1.08265100 | -1.67444100 |
| C  | -1 | -1.61191300 | 3.88630900  | -0.99084500 |
| C  | -1 | -2.90227600 | 4.49738700  | -0.85201200 |
| C  | -1 | -2.97850300 | 5.90766300  | -0.80854500 |
| C  | -1 | -1.86523300 | 6.73449400  | -0.91066900 |
| C  | -1 | -0.60590700 | 6.11182900  | -1.07840200 |
| C  | -1 | -0.48649500 | 4.73235000  | -1.11337800 |
| C  | -1 | -4.16614300 | 3.77277000  | -0.68711000 |
| C  | -1 | -2.37322900 | -0.35448500 | 3.03357800  |
| C  | -1 | -3.18489600 | -0.87040100 | 4.06945300  |
| C  | -1 | -3.06482700 | 0.16238400  | 1.85363600  |
| H  | 0  | -3.32449200 | -1.86123300 | 5.98756800  |
| C  | 0  | -3.41809600 | -4.39046200 | -1.17211800 |
| C  | 0  | -4.40929600 | -4.98327600 | -0.17779900 |
| C  | 0  | -4.01719000 | -4.32398700 | -2.57046800 |
| H  | -1 | -3.96540000 | 6.33975500  | -0.64606100 |
| H  | -1 | -4.26259200 | -0.81129600 | 3.91787700  |
| H  | 0  | -2.52997100 | -2.58647700 | -1.53197100 |
| H  | 0  | -5.30184900 | -4.35122800 | -0.11227400 |
| H  | 0  | -4.71512400 | -5.98522100 | -0.49419700 |
| H  | 0  | -4.90543500 | -3.68207500 | -2.57609600 |
| H  | 0  | -4.30910800 | -5.31974300 | -2.91680600 |
| H  | 0  | -3.29590700 | -3.91628800 | -3.28800400 |
| N  | 0  | -3.03233500 | -3.03774800 | -0.77104200 |
| H  | 0  | 4.91552600  | 5.70452200  | 0.09724900  |
| H  | -1 | 7.16541400  | 4.61683200  | -0.22583000 |
| Sc | -1 | 4.05968200  | -1.22329000 | -0.37612100 |
| Sc | -1 | -0.32644600 | 1.34452600  | 0.52945300  |
| Sc | 0  | 1.27775500  | -1.32934800 | 0.88756000  |
| O  | 0  | 2.13037900  | -2.27413700 | -0.75161300 |
| O  | 0  | -0.02993200 | -0.61697500 | -0.52223100 |
| O  | -1 | -1.53982000 | -0.64287300 | -2.20421300 |
| O  | -1 | 5.46069500  | 0.44685200  | -0.02800900 |
| O  | 0  | 2.67268100  | 0.36446800  | 0.16719000  |
| O  | -1 | 1.62911500  | 2.31382900  | 0.50058600  |
| O  | 0  | -0.09132700 | -0.01447500 | 2.17725200  |



|   |    |             |             |             |
|---|----|-------------|-------------|-------------|
| O | -1 | 4.49753700  | -1.39667900 | 1.85153900  |
| O | 0  | 2.57429000  | -2.14637700 | 2.75020600  |
| C | -1 | 1.64613100  | -2.55462800 | -2.00945400 |
| C | -1 | 0.38498800  | -2.02843500 | -2.45828900 |
| C | -1 | -0.06212900 | -2.38792300 | -3.75524700 |
| C | -1 | 0.65171300  | -3.22906700 | -4.60063800 |
| C | -1 | 1.87807700  | -3.75340900 | -4.12494600 |
| C | -1 | 2.35882500  | -3.41291000 | -2.86526000 |
| C | -1 | -0.42869800 | -1.08902600 | -1.71500000 |
| C | -1 | 5.26456800  | 1.77683700  | -0.02068400 |
| C | -1 | 3.97420700  | 2.38791900  | 0.11814800  |
| C | -1 | 3.89798100  | 3.79819100  | 0.16160800  |
| C | -1 | 5.01125100  | 4.62502200  | 0.05948700  |
| C | -1 | 6.27057700  | 4.00235700  | -0.10824600 |
| C | -1 | 6.38998900  | 2.62287800  | -0.14322400 |
| C | -1 | 2.71037100  | 1.66329100  | 0.28309700  |
| C | -1 | -0.94297900 | -0.48205800 | 3.15128100  |
| H | 0  | 4.35747400  | -2.21037100 | 3.73994800  |
| C | -1 | -2.67154900 | -1.47737000 | 5.21046100  |
| C | -1 | -1.26281500 | -1.57039400 | 5.31714500  |
| C | -1 | -0.43102400 | -1.09576700 | 4.31444200  |
| C | -1 | 3.81165500  | -1.94708400 | 2.82378800  |
| C | 0  | -0.94055700 | -3.74159600 | 0.48388800  |
| C | 0  | -2.22957900 | -2.91313400 | 0.43612800  |
| H | 0  | -0.51174000 | -2.95294500 | 2.34152800  |
| H | -1 | -0.98677200 | -1.92346100 | -4.09680500 |
| H | -1 | 3.31828700  | -3.80199300 | -2.51383600 |
| H | -1 | 2.91108400  | 4.23028300  | 0.32409300  |
| H | -1 | 0.49009400  | 4.26038300  | -1.24387000 |
| H | -1 | -0.81654300 | -2.00754900 | 6.21206700  |
| H | -1 | 0.65521300  | -1.17389900 | 4.40674400  |
| H | 0  | -0.45119200 | -3.70487400 | -0.49510700 |
| H | 0  | -1.15915300 | -4.79198800 | 0.71031700  |
| H | 0  | -1.95286100 | -1.85913400 | 0.53395200  |
| H | 0  | -2.84268600 | -3.15546000 | 1.31427100  |
| H | 0  | 0.66327100  | -3.90271700 | 1.75927300  |
| H | 0  | -2.54350900 | -5.06493700 | -1.21956600 |
| H | 0  | -3.98048400 | -5.07084300 | 0.82546000  |
| N | 0  | -0.00333900 | -3.18351000 | 1.48546400  |
| H | 0  | 0.27943500  | -3.47353900 | -5.59065100 |
| H | -1 | 2.45643200  | -4.43721300 | -4.74816700 |
| O | -1 | 5.33666400  | -2.75235400 | -1.23404300 |
| H | 0  | 5.30409700  | -2.70119200 | -2.19573800 |
| H | -1 | 7.36657800  | 2.15091100  | -0.27371400 |
| H | -1 | -4.67726900 | -0.78972800 | 2.04893200  |

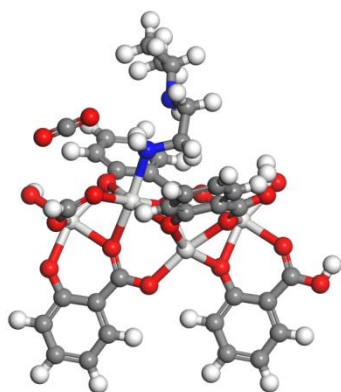

Sc-(B) Complex

-1 1

|    |    |             |             |             |
|----|----|-------------|-------------|-------------|
| H  | 0  | -8.31694300 | 1.83344700  | -0.55607100 |
| Sc | -1 | -2.61723200 | -2.12332100 | -1.39227000 |
| O  | -1 | -2.60026700 | -4.24166200 | -1.88720400 |
| O  | -1 | -3.41693100 | -0.11512500 | -0.92936900 |
| O  | -1 | -4.61958000 | -2.64263800 | -0.69944800 |
| O  | -1 | -6.82384500 | -2.65820000 | -0.34656000 |
| O  | -1 | -2.09535000 | -1.87320500 | 0.80771900  |
| O  | -1 | -2.40707500 | -3.90729500 | 1.68426500  |
| H  | 0  | -1.76215900 | -4.42581700 | -2.32888200 |
| C  | -1 | -4.68384800 | 0.33042700  | -0.85856300 |
| C  | -1 | -5.81640600 | -0.53471100 | -0.69588000 |
| C  | -1 | -7.09864200 | 0.04902400  | -0.58600200 |
| C  | -1 | -7.31890600 | 1.41999900  | -0.64656400 |
| C  | -1 | -6.19136700 | 2.25284400  | -0.84098800 |
| C  | -1 | -5.75219900 | -1.99364600 | -0.57333800 |
| C  | -1 | -1.12201900 | -3.25388900 | 4.04433500  |
| C  | -1 | -1.92627600 | -2.72522300 | 1.79162200  |
| H  | 0  | -0.35378200 | -3.78407800 | 5.99602600  |
| C  | 0  | 4.33566500  | -4.30252800 | -2.95613500 |
| H  | -1 | -7.93104300 | -0.63067500 | -0.40651700 |
| H  | -1 | -1.66240800 | -4.18995600 | 3.90089600  |
| H  | 0  | 1.88304300  | -4.91648400 | 0.23907100  |
| H  | 0  | 2.39692300  | -3.49264800 | -1.64072600 |
| H  | 0  | 3.64148100  | -5.64358400 | -1.43703100 |
| H  | 0  | 3.40948800  | -4.32366400 | -3.54105900 |
| H  | 0  | 5.02732300  | -5.02731600 | -3.39478300 |
| H  | 0  | -3.22908000 | 6.92227000  | 0.25371300  |
| H  | -1 | -6.32653700 | 3.33262500  | -0.92858300 |
| Sc | -1 | 2.47119400  | 2.96537600  | -0.58001300 |
| Sc | -1 | -1.74048600 | 0.25151200  | 0.48068900  |
| Sc | 0  | 1.35485300  | 0.43654200  | 0.69938500  |
| O  | 0  | 2.48610000  | 0.79841900  | -1.02364400 |
| O  | 0  | 0.04554200  | -0.34946400 | -0.69145400 |
| O  | -1 | -0.76048900 | -1.59820300 | -2.39205900 |

|   |    |             |             |             |
|---|----|-------------|-------------|-------------|
| O | -1 | 1.67158100  | 4.97366000  | -0.11701300 |
| O | 0  | 0.46479400  | 2.46312700  | 0.06241500  |
| O | -1 | -1.73538200 | 2.43044800  | 0.46582900  |
| O | 0  | -0.40557700 | -0.16141800 | 2.08592600  |
| O | -1 | 2.99300000  | 3.21544500  | 1.61990900  |
| O | 0  | 2.76361900  | 1.17367500  | 2.54665500  |
| O | 0  | 5.94919500  | 1.06140400  | 1.70097800  |
| O | 0  | 5.22656400  | -1.02299700 | 2.45140000  |
| C | -1 | 2.46399900  | 0.23432400  | -2.27504600 |
| C | -1 | 1.39323100  | -0.62278900 | -2.69637600 |
| C | -1 | 1.46353100  | -1.20813800 | -3.98093500 |
| C | -1 | 2.53221700  | -1.00831400 | -4.84654900 |
| C | -1 | 3.58469200  | -0.17078700 | -4.40250300 |
| C | -1 | 3.54108400  | 0.43890100  | -3.15938600 |
| C | -1 | 0.20504500  | -0.89753000 | -1.90519000 |
| C | -1 | 0.40470000  | 5.41909900  | -0.04637300 |
| C | -1 | -0.72788800 | 4.55406500  | 0.11631100  |
| C | -1 | -2.01009100 | 5.13770300  | 0.22627900  |
| C | -1 | -2.23045400 | 6.50865800  | 0.16581900  |
| C | -1 | -1.10291500 | 7.34150300  | -0.02860400 |
| C | -1 | -4.91587800 | 1.72187300  | -0.93950500 |
| C | -1 | -0.66370300 | 3.09505700  | 0.23898100  |
| C | -1 | -0.41316000 | -1.10563600 | 3.09172600  |
| C | -1 | -1.18030800 | -2.32126800 | 2.98333300  |
| C | -1 | -0.37635700 | -3.04670500 | 5.19996700  |
| C | -1 | 0.34259900  | -1.83042900 | 5.30040100  |
| C | -1 | 0.32745000  | -0.89783100 | 4.27495200  |
| C | -1 | 3.16219800  | 2.36339600  | 2.60388500  |
| C | 0  | 5.58068300  | 0.02280700  | 2.07721700  |
| C | 0  | 1.64325300  | -2.84418200 | 0.78921200  |
| C | 0  | 2.50256100  | -4.00522400 | 0.30734500  |
| C | 0  | 4.07360100  | -4.62669000 | -1.49163200 |
| C | 0  | 5.37599800  | -4.62294800 | -0.69875500 |
| H | -1 | 0.60862400  | -1.80836600 | -4.29290200 |
| H | -1 | 4.35521600  | 1.08767300  | -2.82640600 |
| H | -1 | -2.84249300 | 4.45800300  | 0.40586400  |
| H | -1 | -4.05093900 | 2.37241600  | -1.08809000 |
| H | -1 | 0.91182100  | -1.61428100 | 6.20638000  |
| H | -1 | 0.89276800  | 0.03395800  | 4.35698400  |
| H | 0  | 1.19579500  | -3.06066600 | 1.76178000  |
| H | 0  | 0.82029500  | -2.67566500 | 0.08626600  |
| H | 0  | 3.06957400  | -1.62171200 | 0.08829200  |
| H | 0  | 3.28478900  | -4.20611200 | 1.04845000  |
| H | 0  | 3.02391100  | -1.63461400 | 1.70642500  |
| H | 0  | 4.77569600  | -3.30392500 | -3.05317900 |
| N | 0  | 2.42431400  | -1.59587800 | 0.88369600  |

|   |    |             |             |             |
|---|----|-------------|-------------|-------------|
| N | 0  | 3.13279500  | -3.64173400 | -0.95347000 |
| H | 0  | 2.55580200  | -1.47329900 | -5.82689400 |
| H | -1 | 4.45457600  | -0.01077100 | -5.04201100 |
| H | -1 | -1.23796700 | 8.42120600  | -0.11619700 |
| O | -1 | 4.32809700  | 3.49037500  | -1.57975100 |
| H | 0  | 4.22114300  | 3.39467400  | -2.53262000 |
| C | -1 | 0.17259300  | 6.81043400  | -0.12712200 |
| H | 0  | 3.65656500  | 2.73591200  | 3.51106500  |
| H | -1 | 1.03763000  | 7.46099700  | -0.27580600 |
| H | 0  | -1.74896800 | -4.59314900 | 1.86926400  |
| H | 0  | -6.59449400 | -3.60028600 | -0.31564400 |
| H | 0  | 5.84249300  | -3.63280900 | -0.74569400 |
| H | 0  | 6.07500300  | -5.35504700 | -1.11473600 |
| H | 0  | 5.22212100  | -4.87791700 | 0.35379200  |

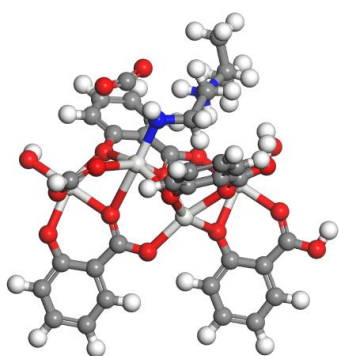

Sc-(C) TS<sub>1</sub>

-1 1

|    |             |             |             |
|----|-------------|-------------|-------------|
| H  | -3.27813900 | 7.41052400  | -1.57788200 |
| Sc | -3.00430000 | 0.43959600  | -1.16206500 |
| O  | -4.69508200 | -0.91437800 | -1.36342700 |
| O  | -1.87562300 | 2.33841100  | -1.07488700 |
| O  | -4.60698700 | 1.83216900  | -0.66074900 |
| O  | -5.94171000 | 3.62006600  | -0.58612000 |
| O  | -2.42018400 | 0.57277000  | 1.03241100  |
| O  | -4.19951800 | -0.22621100 | 2.12733100  |
| H  | -4.52846700 | -1.56697300 | -2.05229300 |
| C  | -2.28538100 | 3.61076100  | -1.22259600 |
| C  | -3.65371700 | 4.01951800  | -1.08808300 |
| C  | -3.96159900 | 5.39253900  | -1.21765100 |
| C  | -3.00604500 | 6.36501400  | -1.48780800 |
| C  | -1.66736700 | 5.93535800  | -1.64983600 |
| C  | -4.77189400 | 3.12907800  | -0.76463500 |
| C  | -2.82776600 | -0.42619800 | 4.52042500  |
| C  | -2.96474100 | 0.11339200  | 2.13477100  |
| H  | -2.72334000 | -0.99348100 | 6.60577600  |
| C  | -3.11681700 | -4.03041900 | -3.07898800 |
| H  | -5.00025800 | 5.67794500  | -1.05395400 |
| H  | -3.90394000 | -0.58009200 | 4.43715600  |

|    |             |             |             |
|----|-------------|-------------|-------------|
| H  | -3.20093900 | -3.54919300 | 0.86877100  |
| H  | -2.13929400 | -2.57045000 | -1.17952700 |
| H  | -4.09332700 | -3.94409800 | -1.16991600 |
| H  | -3.17188000 | -2.95474400 | -3.27263000 |
| H  | -3.96955000 | -4.50962000 | -3.56594500 |
| H  | 3.87507300  | 6.56176700  | -0.82639100 |
| H  | -0.89281300 | 6.66392100  | -1.89715700 |
| Sc | 4.14833000  | -0.40939600 | -0.40995800 |
| Sc | -0.52528500 | 1.49023000  | 0.47144800  |
| Sc | 1.21282600  | -1.02234600 | 1.09240300  |
| O  | 2.45168900  | -1.64839500 | -0.60678300 |
| O  | 0.08126600  | -0.28232600 | -0.46960700 |
| O  | -1.49471600 | -0.89026000 | -1.98396600 |
| O  | 5.27700600  | 1.48941900  | -0.32278100 |
| O  | 2.56453100  | 1.00740000  | 0.12656900  |
| O  | 1.21091900  | 2.77107500  | 0.16598600  |
| O  | 0.00894900  | 0.46683800  | 2.25695000  |
| O  | 4.73234700  | -0.27621000 | 1.78450700  |
| O  | 3.00266500  | -1.14692300 | 2.93034000  |
| O  | 2.16524300  | -4.45226600 | 1.07462900  |
| O  | 0.36434400  | -4.96735900 | -0.29215600 |
| C  | 1.91768100  | -2.32242900 | -1.71224400 |
| C  | 0.57467300  | -2.06245000 | -2.14543300 |
| C  | 0.11095400  | -2.69471900 | -3.32137100 |
| C  | 0.88915800  | -3.57279400 | -4.06606400 |
| C  | 2.20622600  | -3.82581000 | -3.61038000 |
| C  | 2.70428700  | -3.20739100 | -2.47528400 |
| C  | -0.33780600 | -1.14794100 | -1.47883500 |
| C  | 4.86724900  | 2.76176900  | -0.47049100 |
| C  | 3.49891200  | 3.17052600  | -0.33597800 |
| C  | 3.19103100  | 4.54354700  | -0.46554500 |
| C  | 4.14658400  | 5.51602200  | -0.73570000 |
| C  | 5.48526200  | 5.08636700  | -0.89772900 |
| C  | -1.32134700 | 4.60081300  | -1.51696300 |
| C  | 2.38073500  | 2.28008600  | -0.01252800 |
| C  | -0.71985700 | 0.11431100  | 3.38487900  |
| C  | -2.15451900 | -0.02013100 | 3.34536700  |
| C  | -2.17538800 | -0.68229500 | 5.72164200  |
| C  | -0.76954800 | -0.51107900 | 5.74745500  |
| C  | -0.06908000 | -0.13254600 | 4.61270300  |
| C  | 4.18788900  | -0.73560000 | 2.88687800  |
| C  | 1.16338600  | -4.52037500 | 0.45744100  |
| C  | -1.33603800 | -2.59943500 | 1.33182500  |
| C  | -2.14606900 | -3.66919600 | 0.60587600  |
| C  | -3.16173400 | -4.33667000 | -1.59235100 |
| C  | -3.04191000 | -5.82377000 | -1.30796800 |

|   |             |             |             |
|---|-------------|-------------|-------------|
| H | -0.89370200 | -2.43312700 | -3.65428600 |
| H | 3.72325600  | -3.40485500 | -2.13291100 |
| H | 2.15237200  | 4.82895300  | -0.30184800 |
| H | -0.28516600 | 4.27812100  | -1.64236800 |
| H | -0.22467100 | -0.66792700 | 6.68011500  |
| H | 1.01692000  | -0.01179700 | 4.63925100  |
| H | -1.76291400 | -2.54999900 | 2.34131800  |
| H | -1.57748100 | -1.63565800 | 0.86667700  |
| H | -1.14657200 | -3.87338200 | -1.18827200 |
| H | -1.82788800 | -4.67442300 | 0.88194500  |
| H | 0.34219800  | -3.20336100 | 2.29520900  |
| H | -2.19787200 | -4.41208000 | -3.53312600 |
| H | -3.81341900 | -6.35300300 | -1.87233600 |
| H | -3.18357000 | -6.06248400 | -0.25183500 |
| H | -2.06750300 | -6.20657900 | -1.62845600 |
| N | 0.11412700  | -2.76246400 | 1.40458100  |
| N | -2.07977800 | -3.56508500 | -0.88297800 |
| H | 0.50556400  | -4.03574800 | -4.97083200 |
| H | 2.83959000  | -4.53050400 | -4.15211600 |
| H | 6.25981700  | 5.81492900  | -1.14505100 |
| O | 5.65791500  | -1.73925300 | -1.23185800 |
| H | 5.41372000  | -1.97096000 | -2.13486200 |
| C | 5.83128200  | 3.75182200  | -0.76485600 |
| H | 4.80726500  | -0.72645300 | 3.79350100  |
| H | 6.86746400  | 3.42913000  | -0.89026200 |
| H | -4.33711800 | -1.15382700 | 2.37704500  |
| H | -6.55138200 | 2.88806900  | -0.40289100 |

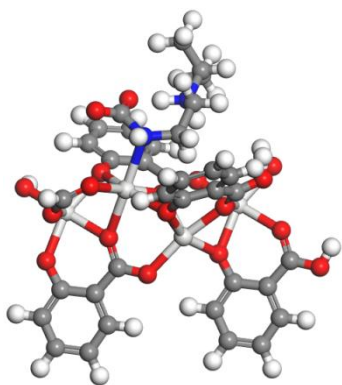

Sc-(D) Intermediate from Gaussian

|      |             |             |             |
|------|-------------|-------------|-------------|
| -1 1 |             |             |             |
| H    | -7.12955800 | 4.17176700  | -1.23902300 |
| Sc   | -2.80839300 | -1.31988800 | -1.33678500 |
| O    | -3.38506200 | -3.38635900 | -1.69690300 |
| O    | -3.00840000 | 0.86535400  | -1.06896900 |
| O    | -4.91498600 | -1.17770500 | -0.78793600 |
| O    | -7.04374700 | -0.52530300 | -0.62552300 |
| O    | -2.37823900 | -1.04727000 | 0.88026300  |

|    |             |             |             |
|----|-------------|-------------|-------------|
| O  | -3.33140200 | -2.82302400 | 1.85053600  |
| H  | -2.62449000 | -3.82523200 | -2.09743800 |
| C  | -4.08947600 | 1.66254300  | -1.13497800 |
| C  | -5.43471300 | 1.17879800  | -1.01730300 |
| C  | -6.49215400 | 2.11540100  | -1.05419600 |
| C  | -6.29417400 | 3.48134800  | -1.21780700 |
| C  | -4.96111600 | 3.93308000  | -1.36548700 |
| C  | -5.81160800 | -0.22068800 | -0.80002400 |
| C  | -2.06496200 | -2.37313600 | 4.26762700  |
| C  | -2.53134900 | -1.82587100 | 1.92578000  |
| H  | -1.61397700 | -2.93683700 | 6.30689700  |
| C  | 0.96678400  | -5.43762200 | -2.91196400 |
| H  | -7.49767800 | 1.72318700  | -0.90535200 |
| H  | -2.84692300 | -3.12148200 | 4.13616400  |
| H  | -0.25816400 | -4.80847400 | 0.87960500  |
| H  | 0.32582900  | -3.71281500 | -1.20559000 |
| H  | 0.14671500  | -6.19025800 | -1.07436400 |
| H  | 0.04585500  | -4.91859200 | -3.19688400 |
| H  | 0.97667800  | -6.40582200 | -3.41832300 |
| H  | -0.83046500 | 7.62088700  | -0.30993400 |
| H  | -4.76604100 | 4.99445500  | -1.53081800 |
| Sc | 3.49105100  | 2.12912700  | -0.40519000 |
| Sc | -1.39244800 | 0.84861900  | 0.45497100  |
| Sc | 1.63081500  | 0.14381000  | 0.92219900  |
| O  | 2.89563000  | 0.01503000  | -0.71373000 |
| O  | 0.20892400  | -0.33515900 | -0.51884000 |
| O  | -0.81917700 | -1.44022200 | -2.20363000 |
| O  | 3.29104300  | 4.31436900  | -0.13737500 |
| O  | 1.38639500  | 2.28418200  | 0.09634000  |
| O  | -0.74430400 | 2.92371300  | 0.30607100  |
| O  | -0.34302500 | 0.19713600  | 2.18599300  |
| O  | 3.92111700  | 2.40169700  | 1.81184400  |
| O  | 2.98463400  | 0.64277400  | 2.86097000  |
| O  | 4.19933800  | -2.25102100 | 1.57718200  |
| O  | 3.20168400  | -3.24761700 | -0.16539100 |
| C  | 2.78784100  | -0.61559900 | -1.92288900 |
| C  | 1.54124400  | -1.15856200 | -2.38125700 |
| C  | 1.51809900  | -1.84511700 | -3.61646400 |
| C  | 2.65138800  | -2.03640100 | -4.39765000 |
| C  | 3.87326800  | -1.50485300 | -3.91723300 |
| C  | 3.93167500  | -0.80602600 | -2.72258700 |
| C  | 0.27662500  | -1.01033800 | -1.67978300 |
| C  | 2.20996800  | 5.11155900  | -0.20338500 |
| C  | 0.86473000  | 4.62781300  | -0.08571000 |
| C  | -0.19271000 | 5.56441600  | -0.12260200 |
| C  | 0.00526900  | 6.93036200  | -0.28621100 |

|   |             |             |             |
|---|-------------|-------------|-------------|
| C | 1.33832700  | 7.38209600  | -0.43389200 |
| C | -3.89534700 | 3.04958500  | -1.32110900 |
| C | 0.48783500  | 3.22832600  | 0.13157100  |
| C | -0.69477600 | -0.60976800 | 3.24879500  |
| C | -1.77757900 | -1.55617500 | 3.15008600  |
| C | -1.36712200 | -2.29403300 | 5.46798800  |
| C | -0.32945900 | -1.33378000 | 5.55480900  |
| C | -0.00322500 | -0.52630500 | 4.47631000  |
| C | 3.76809500  | 1.62314400  | 2.85737500  |
| C | 3.21409200  | -2.60414200 | 0.92288700  |
| C | 0.65737500  | -2.91614800 | 1.27045000  |
| C | 0.71229400  | -4.33060900 | 0.72034600  |
| C | 1.04099400  | -5.65173200 | -1.40926000 |
| C | 2.28842200  | -6.41601000 | -0.99371000 |
| H | 0.54601800  | -2.19647900 | -3.96315900 |
| H | 4.87784200  | -0.39534700 | -2.36117300 |
| H | -1.19823500 | 5.17220300  | 0.02624200  |
| H | -2.86931400 | 3.40720000  | -1.43466900 |
| H | 0.21874700  | -1.21602600 | 6.49126500  |
| H | 0.80522900  | 0.20566900  | 4.54910100  |
| H | 0.16638800  | -2.96973300 | 2.24356400  |
| H | -0.00363700 | -2.31555500 | 0.63777800  |
| H | 1.97739400  | -3.80638300 | -0.72922500 |
| H | 1.48213500  | -4.92846800 | 1.21123800  |
| H | 2.10071200  | -2.08148800 | 2.48227700  |
| H | 1.81719500  | -4.84967700 | -3.27126300 |
| H | 2.30935800  | -7.37404000 | -1.51862700 |
| H | 2.31028300  | -6.62848000 | 0.07803100  |
| H | 3.19209100  | -5.85825900 | -1.25652100 |
| N | 1.92900400  | -2.18074800 | 1.48452300  |
| N | 1.00398000  | -4.31738400 | -0.73429900 |
| H | 2.59906200  | -2.56786400 | -5.34248900 |
| H | 4.79082800  | -1.65771100 | -4.48814400 |
| H | 1.53340300  | 8.44347000  | -0.59922400 |
| O | 5.48026800  | 2.00879300  | -1.27203400 |
| H | 5.39846500  | 1.85128700  | -2.21935600 |
| C | 2.40409500  | 6.49860100  | -0.38951400 |
| H | 4.33602800  | 1.87769100  | 3.76234100  |
| H | 3.43012900  | 6.85621600  | -0.50307400 |
| H | -2.91188900 | -3.65950100 | 2.10127900  |
| H | -7.10586200 | -1.48751500 | -0.51680500 |



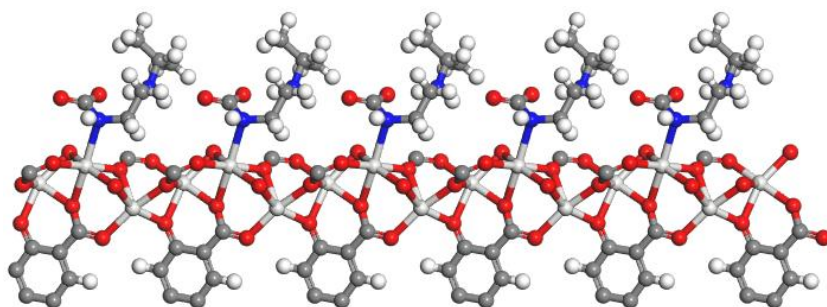

Sc-(D) Intermediate from VASP

1.00000000000000

|                      |                     |                     |
|----------------------|---------------------|---------------------|
| 21.4710867371575844  | -0.0531959284748713 | 0.0050229101391039  |
| -11.4631297564989882 | 19.3939010790228927 | -0.0659159445800252 |
| -0.0033510381719069  | -0.0278106793719069 | 7.2419343038475716  |

Sc O C H N

6 20 48 32 2

Direct

|                    |                    |                    |
|--------------------|--------------------|--------------------|
| 0.3353558071945244 | 0.7438331433783958 | 0.8475076307220633 |
| 0.2643683273151822 | 0.6468574446230662 | 0.1901548511204041 |
| 0.3783230573486094 | 0.6825772387888307 | 0.5199703638641608 |
| 0.6971956347324593 | 0.3599190473708020 | 0.2199832772816350 |
| 0.5913542535502287 | 0.2876705276413034 | 0.8861664856308025 |
| 0.6228646829009676 | 0.3872135126089091 | 0.5554327890800153 |
| 0.4189514590555845 | 0.7876735051838253 | 0.6368210584448164 |
| 0.3706206600793749 | 0.7399844217911280 | 0.2853462450699737 |
| 0.3962863193738144 | 0.8183385138455321 | 0.0645637690200758 |
| 0.2259963846261499 | 0.6892382875426080 | 0.9708602123167083 |
| 0.2713457585995371 | 0.6814787060778613 | 0.6123779413370158 |
| 0.1839217072261619 | 0.6272246226822205 | 0.4014126896713393 |
| 0.3203492841572952 | 0.5968004357766645 | 0.3086298474995104 |
| 0.3265528134620297 | 0.6451198228305088 | 0.9546325838289746 |
| 0.3821393139956442 | 0.6169543244485496 | 0.7401251385809786 |
| 0.5622715844495900 | 0.7679804562631460 | 0.6904117431312145 |
| 0.5741476729459976 | 0.8294298142665824 | 0.4307201774324980 |
| 0.7334381057504871 | 0.4409129270611203 | 0.4367189538912513 |
| 0.6881931444096381 | 0.3911137622393071 | 0.7909443145157269 |
| 0.7744373081517111 | 0.4211130159063643 | 0.0050273870365203 |
| 0.6412564966839298 | 0.2540526658475741 | 0.0986935866484089 |
| 0.6349787454234104 | 0.2971254910272023 | 0.4543507305660412 |
| 0.5773539968313557 | 0.2150062896656166 | 0.6658254976896529 |
| 0.5373031870510374 | 0.3410685926200401 | 0.7680995934956272 |
| 0.5887916650173040 | 0.3465468189937297 | 0.1231180323420560 |
| 0.5618371067326748 | 0.4016158128820422 | 0.3377021021617068 |
| 0.4514425126762802 | 0.8504266372525606 | 0.5576580946911420 |
| 0.4457483283865002 | 0.8604043920190492 | 0.3642518203243483 |
| 0.4816085250111470 | 0.9285482207659328 | 0.2956789081996973 |
| 0.5230590939691382 | 0.9862748951071652 | 0.4064500116636296 |

|                    |                    |                    |
|--------------------|--------------------|--------------------|
| 0.5285677101179758 | 0.9750858633956270 | 0.5965002635032377 |
| 0.4931888408109444 | 0.9091524047316639 | 0.6694410144220413 |
| 0.4031305502429845 | 0.8049093143716419 | 0.2335028582085386 |
| 0.1600820421053442 | 0.6601092271659965 | 0.8916845918025729 |
| 0.1471043125673930 | 0.6411700073325690 | 0.7000162447672622 |
| 0.0751320528992281 | 0.6086125054595257 | 0.6332950360188789 |
| 0.0163643257443979 | 0.5948974094348287 | 0.7436986904880101 |
| 0.0306343068074568 | 0.6155746090386529 | 0.9312918693890353 |
| 0.1002896209840927 | 0.6469757169669847 | 0.0026243342555787 |
| 0.2025671286685480 | 0.6500885766070823 | 0.5667695284590550 |
| 0.3424814046370201 | 0.5572721735602570 | 0.2260512989537915 |
| 0.3589829935672313 | 0.5607984964635335 | 0.0320890961079812 |
| 0.3863389758316558 | 0.5197842354229607 | 0.9629382523652197 |
| 0.3970549203185101 | 0.4752444003004754 | 0.0724588372166011 |
| 0.3787500805703417 | 0.4712612709110147 | 0.2616976903116921 |
| 0.3527365329847143 | 0.5113138487281645 | 0.3355625423302300 |
| 0.3558714712970001 | 0.6089125971449292 | 0.9029585370873008 |
| 0.5509883183954756 | 0.7746287119511948 | 0.5240978900261979 |
| 0.5045960838873782 | 0.7022836695647641 | 0.2235946918605833 |
| 0.5778193680393358 | 0.7434055276771971 | 0.1259624758634388 |
| 0.7989235243857991 | 0.4782287051661243 | 0.5171209255845497 |
| 0.8119796149912233 | 0.4731151823284705 | 0.7092827546632492 |
| 0.8836753372513044 | 0.5127668268917631 | 0.7772641571210812 |
| 0.9419408556676743 | 0.5574445278235345 | 0.6676556856918268 |
| 0.9274989160185498 | 0.5630997973582552 | 0.4798080544144128 |
| 0.8582138973245961 | 0.5244477579545190 | 0.4072296705227458 |
| 0.7567718432903234 | 0.4270547128532414 | 0.8399881001244296 |
| 0.6154677431297984 | 0.1921305392681845 | 0.1787650630674378 |
| 0.5964964506658177 | 0.1796683929734186 | 0.3706495721816481 |
| 0.5669474118151498 | 0.1118443157045022 | 0.4382655563380951 |
| 0.5569035634311845 | 0.0566059296967012 | 0.3292434060711429 |
| 0.5777947926731670 | 0.0703919321310025 | 0.1416720831935834 |
| 0.6057167519237652 | 0.1359220736038651 | 0.0690849527724779 |
| 0.6027742110221013 | 0.2319428754771948 | 0.5020115012591404 |
| 0.5025248746614679 | 0.3701439994529849 | 0.8472903867461810 |
| 0.5094675933704735 | 0.3885730248127857 | 0.0395400286720076 |
| 0.4731549557931345 | 0.4218555227735266 | 0.1062530787232703 |
| 0.4300037732099469 | 0.4367040744525568 | 0.9956850104803081 |
| 0.4221189919972588 | 0.4162801285833737 | 0.8077721140168777 |
| 0.4575105988893995 | 0.3842290573086942 | 0.7363555754262734 |
| 0.5546311292180732 | 0.3787034550169324 | 0.1716477854457565 |
| 0.6672565381472850 | 0.8660394837147223 | 0.0139177390878160 |
| 0.6633554207535468 | 0.9265880242518847 | 0.9338826398057876 |
| 0.7227740717300364 | 0.8875216752502411 | 0.1693649754191924 |
| 0.4737324589705594 | 0.9345533713913596 | 0.1497671465690260 |
| 0.5618294766865759 | 0.0189816063150161 | 0.6873585580202217 |

|                    |                    |                    |
|--------------------|--------------------|--------------------|
| 0.4975333916732581 | 0.9009877057919766 | 0.8163532427070663 |
| 0.0666799122668280 | 0.5922310772545885 | 0.4890561766956765 |
| 0.9861812107512762 | 0.6073372385779408 | 0.0213966887295243 |
| 0.1108063451325307 | 0.6627117557847413 | 0.1476617603040822 |
| 0.4015139278536495 | 0.5262330992976629 | 0.8176038455160537 |
| 0.3845667244848272 | 0.4355795744445956 | 0.3512627998944993 |
| 0.3392264372784481 | 0.5082676645723723 | 0.4820282471918489 |
| 0.4828964682466008 | 0.6473149527426685 | 0.1947135801582789 |
| 0.5765460233992812 | 0.7184804923716968 | 0.9941749353346481 |
| 0.8923182149540949 | 0.5053932802067678 | 0.9216047734613184 |
| 0.9715609007113031 | 0.5989756542139233 | 0.3905099546410256 |
| 0.8475897764160436 | 0.5289311873639377 | 0.2619365745400160 |
| 0.5500904262211392 | 0.1037234641901250 | 0.5823370483887871 |
| 0.5723637478690904 | 0.0288295260618199 | 0.0520779214159006 |
| 0.6214138617300122 | 0.1459143028345480 | 0.9239698709655286 |
| 0.4822282248389840 | 0.4378133575358021 | 0.2508352910287428 |
| 0.3869865417309271 | 0.4251389039406774 | 0.7174526708876954 |
| 0.4512016052972072 | 0.3687723958511455 | 0.5910666448422646 |
| 0.4663014284600919 | 0.7147590826376060 | 0.1583211858659581 |
| 0.5569047907814380 | 0.8087903269315575 | 0.9788014647999503 |
| 0.5812402568152706 | 0.8306929036569954 | 0.2133757361546387 |
| 0.6221968043560011 | 0.7483656040348592 | 0.2124009312982622 |
| 0.5048592981489080 | 0.6707879507036907 | 0.4940844675052318 |
| 0.6782940589285502 | 0.8395595073431323 | 0.9015859602700829 |
| 0.6468911164463194 | 0.9510299831687234 | 0.0399844170888599 |
| 0.6253169857002163 | 0.9096506961749142 | 0.8168002148059159 |
| 0.7169032234858435 | 0.9658137041048676 | 0.8828915505247039 |
| 0.7763503707913983 | 0.9261153735148540 | 0.1170723613060503 |
| 0.7270126896023825 | 0.8441241373488637 | 0.2221776870807304 |
| 0.7090596663924487 | 0.9103138711084142 | 0.2856052579832706 |
| 0.5017879357376245 | 0.7089757621544379 | 0.4268250366774211 |
| 0.5924889428949953 | 0.8142943167885264 | 0.0826837718221967 |

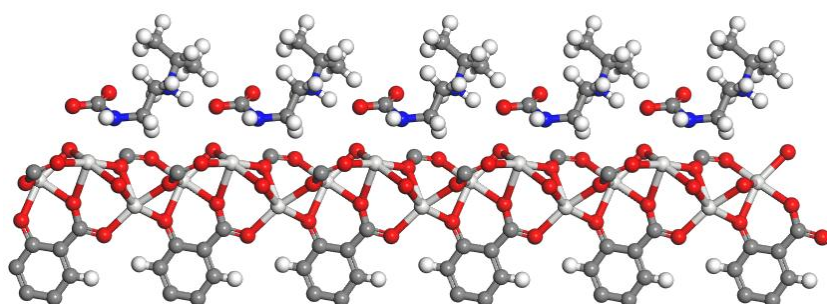

Sc-(E) TS<sub>2</sub>

|                      |                     |                    |   |   |
|----------------------|---------------------|--------------------|---|---|
| 1.0000000000000000   |                     |                    |   |   |
| 21.2615589324937133  | 0.0000000000000000  | 0.0000000000000000 |   |   |
| -11.7260113933134384 | 19.4283120884814871 | 0.0000000000000000 |   |   |
| 0.1005985251799197   | -0.0093968498117857 | 7.2164507784067453 |   |   |
| Sc                   | O                   | C                  | H | N |

## Direct

|                    |                    |                    |
|--------------------|--------------------|--------------------|
| 0.3409822742178816 | 0.7451277662335384 | 0.8341611871977717 |
| 0.2676793567455329 | 0.6511789605124433 | 0.1766236777275053 |
| 0.3853899951155482 | 0.6842001878778328 | 0.5011208726987796 |
| 0.6956258396954821 | 0.3606288056545858 | 0.2169446114995920 |
| 0.5892660290993453 | 0.2868507463419134 | 0.8837909795986241 |
| 0.6199366851249452 | 0.3862345864026045 | 0.5509707475993861 |
| 0.4247425928421426 | 0.7890525152716203 | 0.6201149836694220 |
| 0.3766550269268880 | 0.7422443284914555 | 0.2694273026516943 |
| 0.4043593422885627 | 0.8206029091033156 | 0.0474974227972372 |
| 0.2299310548575258 | 0.6941018768186582 | 0.9608421595024303 |
| 0.2762793549951550 | 0.6838431535026455 | 0.6004813169326976 |
| 0.1875820821123325 | 0.6333289365034798 | 0.3903749796917970 |
| 0.3189953704674179 | 0.5981498478309804 | 0.2946045601087144 |
| 0.3271915984847173 | 0.6449590741122240 | 0.9377910562321725 |
| 0.3791064132133782 | 0.6123626280748136 | 0.7201794910494637 |
| 0.5396475375318379 | 0.7494038727939673 | 0.6030849584756290 |
| 0.5794925363379895 | 0.8193801876538621 | 0.3461551648821207 |
| 0.7327745954846672 | 0.4415703233644741 | 0.4309132188858432 |
| 0.6859523782327898 | 0.3912303578045798 | 0.7864316618990345 |
| 0.7730155768689174 | 0.4226821963937639 | 0.9997003334769226 |
| 0.6414541719538103 | 0.2558507735824235 | 0.0948933231251498 |
| 0.6332086852238483 | 0.2967961598758563 | 0.4528504717454171 |
| 0.5766191877998479 | 0.2140935544349745 | 0.6657837273669124 |
| 0.5322928771267826 | 0.3366109338667423 | 0.7662432257731281 |
| 0.5850359722184593 | 0.3447118419597219 | 0.1216377051794050 |
| 0.5580762531393489 | 0.4006099695001193 | 0.3348863162045048 |
| 0.4560320687065357 | 0.8519890277359282 | 0.5432357309282096 |
| 0.4514870789523918 | 0.8625318031746895 | 0.3492816756010623 |
| 0.4861100591051477 | 0.9309293118353734 | 0.2831888063446481 |
| 0.5251458244140470 | 0.9881975381823560 | 0.3967886450719614 |
| 0.5291149850895799 | 0.9763580307963280 | 0.5873769210025556 |
| 0.4947976364560704 | 0.9101331976731928 | 0.6580534335996006 |
| 0.4100764998595438 | 0.8071826649140843 | 0.2177198584864022 |
| 0.1630873504677704 | 0.6650299551162051 | 0.8832316549130732 |
| 0.1505104951660065 | 0.6460234154735839 | 0.6915623435316444 |
| 0.0778274487254277 | 0.6136040784880242 | 0.6255252760182293 |
| 0.0179059174520297 | 0.5998442653435031 | 0.7368247925806252 |
| 0.0317998115454304 | 0.6206638986964579 | 0.9246071121665089 |
| 0.1022731221962768 | 0.6521846789099220 | 0.9951713609307659 |
| 0.2067495012839855 | 0.6546110929431971 | 0.5567836849167734 |
| 0.3410020757908890 | 0.5583148331736897 | 0.2135847218467994 |
| 0.3557590362924988 | 0.5589893070189260 | 0.0178505773813451 |
| 0.3824037290675005 | 0.5171038845493929 | 0.9508422327990365 |
| 0.3941309711807882 | 0.4745077071826703 | 0.0643492806960481 |

|                    |                    |                    |
|--------------------|--------------------|--------------------|
| 0.3773178809227752 | 0.4732106520243011 | 0.2554023960807607 |
| 0.3520541186602472 | 0.5141248931792225 | 0.3271581528334357 |
| 0.3535987825273180 | 0.6063669315301460 | 0.8850281297532990 |
| 0.5464675074705840 | 0.7627859437120903 | 0.4289275857352832 |
| 0.5117346648340005 | 0.7018186118483146 | 0.1163787222104183 |
| 0.5888402865778946 | 0.7474644665671010 | 0.0289577386677051 |
| 0.7987951165126717 | 0.4800737250832705 | 0.5104871907142288 |
| 0.8113201669776918 | 0.4754214966088314 | 0.7033708236689351 |
| 0.8835061769531520 | 0.5162830598996981 | 0.7714027796291636 |
| 0.9428062202982067 | 0.5616498929587452 | 0.6609418281471963 |
| 0.9288922718996691 | 0.5666993006165809 | 0.4720459888516976 |
| 0.8591118000993949 | 0.5269327081853458 | 0.3995298259193015 |
| 0.7552709901913960 | 0.4283795359220142 | 0.8345635940241680 |
| 0.6162893363839567 | 0.1940479036073781 | 0.1742055344756189 |
| 0.5965655675992791 | 0.1805657271549887 | 0.3669826170348758 |
| 0.5673034170736887 | 0.1127574879867119 | 0.4332662595408820 |
| 0.5584946794254984 | 0.0587105993256594 | 0.3219441902725572 |
| 0.5806666419130728 | 0.0737749808952452 | 0.1338839035672327 |
| 0.6081422493962397 | 0.1392075406419383 | 0.0625269533703413 |
| 0.6019108264255140 | 0.2317330495508742 | 0.5002403400946122 |
| 0.4979961516877043 | 0.3665993371212727 | 0.8447600122553184 |
| 0.5054989019433896 | 0.3864007999950566 | 0.0364640728668720 |
| 0.4696933317608135 | 0.4206135432251557 | 0.1015196843551185 |
| 0.4265769762875259 | 0.4351003240190774 | 0.9899035105985330 |
| 0.4181174518171501 | 0.4133172609377246 | 0.8028362204833687 |
| 0.4530377761210681 | 0.3803628518819441 | 0.7329444744406146 |
| 0.5507630961229729 | 0.3770286969030640 | 0.1691503737379666 |
| 0.6696820912946759 | 0.8638521895516934 | 0.8646559185603960 |
| 0.6594364711361058 | 0.9139646209460007 | 0.7478380485598067 |
| 0.7234494144737597 | 0.8991503770625940 | 0.0223193077043593 |
| 0.4790882589805026 | 0.9375067077447535 | 0.1369876623194651 |
| 0.5602455257613783 | 0.0198595888027880 | 0.6805843971295942 |
| 0.4975789474116196 | 0.9014036095018841 | 0.8056416756579989 |
| 0.0696804082393547 | 0.5971200941751074 | 0.4811967865616020 |
| 0.9864849256631226 | 0.6123722246511007 | 0.0156563093481111 |
| 0.1124150807679404 | 0.6679535562461065 | 0.1404024338066779 |
| 0.3966045415539463 | 0.5216150317176432 | 0.8038285736052057 |
| 0.3835885464421186 | 0.4388730041962302 | 0.3481137122255196 |
| 0.3396631850391084 | 0.5131576929558908 | 0.4749484692689480 |
| 0.4905570081732337 | 0.6484217911459222 | 0.0735955188486392 |
| 0.5989087344445863 | 0.7193181083556979 | 0.9198910116367637 |
| 0.8917769060978571 | 0.5092082060186595 | 0.9163583615494736 |
| 0.9737883387366196 | 0.6028501084334994 | 0.3816757686645345 |
| 0.8489662710026429 | 0.5308920695119118 | 0.2534353156834113 |
| 0.5497654400293481 | 0.1037453323307628 | 0.5781431099939716 |
| 0.5766858347721997 | 0.0333030127697468 | 0.0430121676545909 |

|                    |                    |                    |
|--------------------|--------------------|--------------------|
| 0.6246119983720368 | 0.1501341442655404 | 0.9168802639663401 |
| 0.4791843280118602 | 0.4375576850425800 | 0.2454789302507381 |
| 0.3829145273989537 | 0.4218032400755065 | 0.7119802992946264 |
| 0.4463932575322052 | 0.3639921809772166 | 0.5881720139154540 |
| 0.4741050228473705 | 0.7161923544672273 | 0.0562406855548766 |
| 0.5619291509589954 | 0.7912547777288405 | 0.8151960240054202 |
| 0.5756816473130081 | 0.8307451097626853 | 0.0323197446924344 |
| 0.6317026277897323 | 0.7654178580531232 | 0.1334138904708059 |
| 0.5038100098293233 | 0.6600530517260069 | 0.3793281794277046 |
| 0.6872711706086742 | 0.8355804909487476 | 0.7740236658746412 |
| 0.6396440674894287 | 0.9415480297454688 | 0.8336501426500056 |
| 0.6210363652207173 | 0.8876884422317014 | 0.6337874119147846 |
| 0.7124488931140864 | 0.9524867986718962 | 0.6863938249192345 |
| 0.7763003780241294 | 0.9391757145132610 | 0.9636075767229693 |
| 0.7333589038960530 | 0.8637681404089403 | 0.1017515093728088 |
| 0.7035262116773318 | 0.9238350866822839 | 0.1188551356918947 |
| 0.5047248357732831 | 0.7010244728387307 | 0.3192728573404689 |
| 0.5945452654314252 | 0.8091020742002191 | 0.9364489964692775 |

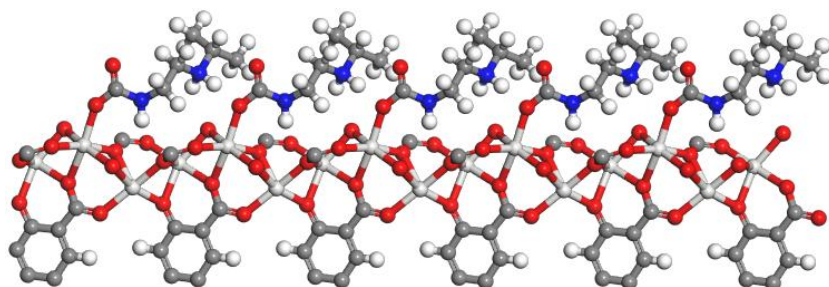

Sc-(F) Product

|                      |                     |                    |    |   |
|----------------------|---------------------|--------------------|----|---|
| 1.000000000000000    |                     |                    |    |   |
| 20.8532416605149500  | -0.3321763867010240 | 0.2770573892022836 |    |   |
| -11.5220950549351322 | 19.4529990377284570 | 0.2061846355415068 |    |   |
| 0.0069393118376872   | 0.0978963272974585  | 7.2423285440284424 |    |   |
| Sc                   | O                   | C                  | H  | N |
| 6                    | 20                  | 48                 | 32 | 2 |

Direct

|                    |                    |                    |
|--------------------|--------------------|--------------------|
| 0.3500505175996835 | 0.7603840584462915 | 0.8291737600564559 |
| 0.2731969285434630 | 0.6605634076153066 | 0.1486724427989543 |
| 0.3886086812192744 | 0.6848447613368265 | 0.4820041842929186 |
| 0.6934144019473081 | 0.3631197584605843 | 0.2124834952831876 |
| 0.5853092611898632 | 0.2854039675932256 | 0.8844462742771100 |
| 0.6138861918226155 | 0.3849727329642150 | 0.5455447019854205 |
| 0.4425446691174244 | 0.7829405225580999 | 0.6197695768076983 |
| 0.3783362608739438 | 0.7445531940211865 | 0.2678294082862891 |
| 0.4111541340601050 | 0.8292599484004342 | 0.0526821779876556 |
| 0.2342827942853845 | 0.7047186851597971 | 0.9431988399375584 |
| 0.2872801158844780 | 0.6905263294821538 | 0.5982669193423291 |
| 0.2004708876424814 | 0.6436652164160961 | 0.3799841910474910 |
| 0.3236549625052447 | 0.6061650596698342 | 0.2800005297685004 |

|                    |                    |                    |
|--------------------|--------------------|--------------------|
| 0.3440595922989687 | 0.6618047328685961 | 0.9263732401252369 |
| 0.3768460366924060 | 0.6152934419373395 | 0.7003964630400219 |
| 0.4999765188505094 | 0.7144595048043456 | 0.3902578932286858 |
| 0.6091465224577775 | 0.7338785561045285 | 0.2631902077121282 |
| 0.7294983397916823 | 0.4436744958626662 | 0.4197723325536060 |
| 0.6823436467888513 | 0.3922469355839979 | 0.7788664212612133 |
| 0.7715193805874989 | 0.4271439774182113 | 0.9891700843183955 |
| 0.6414952809772458 | 0.2581339903384574 | 0.0999596470315964 |
| 0.6307355136320183 | 0.2972573632209574 | 0.4531293517978767 |
| 0.5763342729838143 | 0.2134794289661741 | 0.6732160638378630 |
| 0.5240811335570541 | 0.3328454058849033 | 0.7649877837005121 |
| 0.5789812557969896 | 0.3421840851875970 | 0.1174290172697710 |
| 0.5496813221616534 | 0.3961868238008535 | 0.3267488822945666 |
| 0.4661695582912913 | 0.8481128648620242 | 0.5476080667337797 |
| 0.4578760038193934 | 0.8626548312097029 | 0.3569898816445374 |
| 0.4917003685541701 | 0.9334603034398725 | 0.2992886209862249 |
| 0.5315929145517018 | 0.9888335306661773 | 0.4148425002328864 |
| 0.5372575298808258 | 0.9734893299861369 | 0.6020211832426057 |
| 0.5047815339424631 | 0.9044807944566102 | 0.6647699400929099 |
| 0.4159258191040323 | 0.8119717083040285 | 0.2216856638155136 |
| 0.1668863358212249 | 0.6749411651036610 | 0.8616670316207689 |
| 0.1573970443337558 | 0.6553139638084460 | 0.6725656589975486 |
| 0.0835601448988612 | 0.6218330734678759 | 0.6038111180956207 |
| 0.0210021594133138 | 0.6079490992719698 | 0.7106322396798177 |
| 0.0325394255665969 | 0.6299157371748692 | 0.8952765374546345 |
| 0.1038216557985123 | 0.6625088047242471 | 0.9680596542532101 |
| 0.2170231510818894 | 0.6635137805826190 | 0.5466811300598096 |
| 0.3420378438564740 | 0.5626864200745629 | 0.2007874761407962 |
| 0.3568572386331681 | 0.5644209010087877 | 0.0047875285463945 |
| 0.3787025802040489 | 0.5185835639778915 | 0.9387359363562311 |
| 0.3855799798550947 | 0.4723459395073704 | 0.0537728645715703 |
| 0.3676943517094315 | 0.4699099333393377 | 0.2440115883648843 |
| 0.3468215994164652 | 0.5143583952944510 | 0.3145864285989788 |
| 0.3577845107497239 | 0.6137402401558418 | 0.8727864697942067 |
| 0.5440674035603763 | 0.7215415241241914 | 0.2467060432828845 |
| 0.5448073857623115 | 0.7005114397130683 | 0.9142355813447125 |
| 0.6140093932109920 | 0.7619658640184781 | 0.8172991892314556 |
| 0.7971688566552970 | 0.4833026155270446 | 0.4950089835025508 |
| 0.8101618595289679 | 0.4792765649504176 | 0.6876588456915158 |
| 0.8840086292662548 | 0.5216741431163214 | 0.7511479498599911 |
| 0.9445343741777350 | 0.5677687216637750 | 0.6364150848743648 |
| 0.9302822590092603 | 0.5718675380990419 | 0.4474983291758292 |
| 0.8587919498895076 | 0.5307532865507980 | 0.3794297417173098 |
| 0.7531515044524824 | 0.4315271972518815 | 0.8235569487375898 |
| 0.6183592204197979 | 0.1963654299095481 | 0.1840236620474727 |
| 0.5985645612040003 | 0.1817450063589519 | 0.3775149667063360 |

|                    |                    |                    |
|--------------------|--------------------|--------------------|
| 0.5712567711016163 | 0.1136086935059026 | 0.4484231071132356 |
| 0.5642113635512800 | 0.0605645501688770 | 0.3400012922774565 |
| 0.5869144626674583 | 0.0770220656623124 | 0.1514074649245671 |
| 0.6126676076678450 | 0.1426371012482832 | 0.0760245594282338 |
| 0.6016304954148595 | 0.2320380937218616 | 0.5064312364697301 |
| 0.4886880023981988 | 0.3622912088884078 | 0.8414970307847440 |
| 0.4961355781100423 | 0.3818512454464482 | 0.0308241701898098 |
| 0.4599217448759276 | 0.4161069332323564 | 0.0935300809521635 |
| 0.4164002667661748 | 0.4311997127884766 | 0.9815530097359968 |
| 0.4075303578476976 | 0.4093751973325581 | 0.7970159935664611 |
| 0.4426777578564369 | 0.3761027890391802 | 0.7296455396172661 |
| 0.5428432721331617 | 0.3730909408397167 | 0.1634757903923045 |
| 0.6659950150345821 | 0.8599297617319692 | 0.5749921544183678 |
| 0.6435226208265874 | 0.8896887405588600 | 0.4151956922988873 |
| 0.7130150172980336 | 0.9155344344882081 | 0.7128081667391868 |
| 0.4830055675053160 | 0.9430029154538886 | 0.1565584272646490 |
| 0.5680321659302123 | 0.0151829433089148 | 0.6979121264895909 |
| 0.5105987212315526 | 0.8933443133578365 | 0.8092243363655385 |
| 0.0765810981283295 | 0.6041948163510398 | 0.4625145026439057 |
| 0.9849737637564360 | 0.6215784119765360 | 0.9814054251349731 |
| 0.1129165851780343 | 0.6795144726144215 | 0.1105239318186335 |
| 0.3937753505496104 | 0.5232997376527422 | 0.7921528013435193 |
| 0.3701114916413175 | 0.4326723321032659 | 0.3372347571553647 |
| 0.3339299816385974 | 0.5129228400191153 | 0.4619153601004911 |
| 0.5616764692279261 | 0.6639517718092165 | 0.9594604888165037 |
| 0.6470216046676143 | 0.7436177311523622 | 0.7467388342434091 |
| 0.8927144978055424 | 0.5153035449874821 | 0.8964463713671265 |
| 0.9761654129710848 | 0.6084454906626533 | 0.3537848501952610 |
| 0.8482092832624701 | 0.5341719116340400 | 0.2334172158330858 |
| 0.5534460090707043 | 0.1033109921104867 | 0.5937418715945242 |
| 0.5846056642313684 | 0.0373574619234205 | 0.0634834342029365 |
| 0.6294734957796990 | 0.1546308532567195 | 0.9300244502770454 |
| 0.4699666697510807 | 0.4333070211893002 | 0.2353056246378316 |
| 0.3720697190293762 | 0.4184062173683003 | 0.7057042074387212 |
| 0.4356925799511231 | 0.3598156070254035 | 0.5866292406951530 |
| 0.4996679069511742 | 0.6733160345188551 | 0.8153225488392195 |
| 0.5641083731951468 | 0.7634027974225432 | 0.5661977494534085 |
| 0.5616356547641246 | 0.8147218276619554 | 0.7214318273062190 |
| 0.6490917002613870 | 0.7995377877853187 | 0.9197551015823535 |
| 0.4593588536230797 | 0.7026748154747580 | 0.0714085264510231 |
| 0.6966764801347480 | 0.8364041694705620 | 0.5196704692608023 |
| 0.6176375638201961 | 0.9181793652250434 | 0.4649977989481542 |
| 0.6046889549234820 | 0.8494869630925805 | 0.3229227622267530 |
| 0.6945573755858732 | 0.9263080661694474 | 0.3337760563163314 |
| 0.7603745814730871 | 0.9599151225130669 | 0.6376161213407059 |
| 0.7365686672965239 | 0.8980027749194832 | 0.8199176241839581 |



0.6796952419698812 0.9345411538061796 0.7795659147376739  
 0.5145273393085716 0.7176681663742741 0.0735252834484612  
 0.5964371769482710 0.7988178681527316 0.6695819178803433

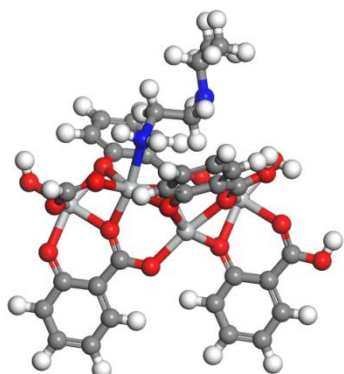

Ti-(A) i-2-MOF

-1 1

|    |             |             |             |
|----|-------------|-------------|-------------|
| H  | -1.72930000 | 7.74220700  | -1.18558000 |
| H  | 0.49284100  | 6.59638600  | -1.44654400 |
| Ti | -2.74263600 | 0.93441700  | -1.38796900 |
| O  | -4.54151500 | -0.05025500 | -1.79060000 |
| O  | -1.31181900 | 2.48015400  | -1.02559400 |
| O  | -4.04560700 | 2.45427700  | -0.67384500 |
| O  | -5.09521100 | 4.42398300  | -0.63716000 |
| O  | -2.34169400 | 0.68566500  | 0.71298200  |
| O  | -4.33717600 | 0.18653700  | 1.57654900  |
| H  | -5.15787100 | 0.50431300  | -1.29785100 |
| C  | -1.46751800 | 3.81932700  | -1.08821300 |
| C  | -2.74258200 | 4.45963400  | -0.98216500 |
| C  | -2.79387100 | 5.86875300  | -1.02354600 |
| C  | -1.65859500 | 6.66018300  | -1.16862700 |
| C  | -0.41353600 | 6.00516700  | -1.30170000 |
| C  | -0.32246900 | 4.62229300  | -1.26374500 |
| C  | -4.00478500 | 3.75241900  | -0.75668300 |
| C  | -2.41408300 | -0.11849900 | 2.96564400  |
| C  | -3.24567000 | -0.52062100 | 4.02872700  |
| C  | -3.06945500 | 0.28026600  | 1.71537600  |
| H  | -3.41229400 | -1.32710500 | 6.02775600  |
| C  | -3.12068000 | -4.91940300 | -0.94834700 |
| C  | -4.18365600 | -5.28576900 | 0.08013800  |
| C  | -3.58967800 | -5.24821700 | -2.35938500 |
| H  | -3.76974300 | 6.33265300  | -0.88095100 |
| H  | -4.32124400 | -0.47962000 | 3.85549900  |
| H  | -2.23695000 | -3.24780500 | -1.69010700 |
| H  | -5.09187400 | -4.69699800 | -0.08950200 |
| H  | -4.43780900 | -6.34726700 | 0.00213100  |
| H  | -4.49393900 | -4.67950600 | -2.60244200 |
| H  | -3.81385700 | -6.31442000 | -2.45670900 |
| H  | -2.82030100 | -4.99726400 | -3.09857200 |

|    |             |             |             |
|----|-------------|-------------|-------------|
| N  | -2.81942400 | -3.48739100 | -0.89137100 |
| H  | 4.88334100  | 5.55234200  | -0.08446100 |
| H  | 7.10577000  | 4.40628900  | -0.33804700 |
| Ti | 3.87005700  | -1.25570700 | -0.27958300 |
| Ti | -0.35192200 | 1.35647600  | 0.47506000  |
| Ti | 1.21914300  | -1.06541900 | 0.85561000  |
| O  | 2.04314100  | -2.20548500 | -0.68487500 |
| O  | -0.05412000 | -0.49285500 | -0.52337800 |
| O  | -1.44996800 | -0.42828900 | -2.27556300 |
| O  | 5.30101200  | 0.29006200  | 0.08270100  |
| O  | 2.60232400  | 0.26829600  | 0.22934500  |
| O  | 1.51770200  | 2.23393300  | 0.47134300  |
| O  | -0.13801300 | 0.12577800  | 2.14740300  |
| O  | 4.27124300  | -1.50441100 | 1.82156900  |
| O  | 2.28718400  | -1.87939700 | 2.78250200  |
| C  | 1.54374200  | -2.58534800 | -1.87709000 |
| C  | 0.33068300  | -2.01343700 | -2.38712700 |
| C  | -0.11604000 | -2.41095600 | -3.66554900 |
| C  | 0.56012400  | -3.34275400 | -4.44704500 |
| C  | 1.73974600  | -3.91203700 | -3.91479700 |
| C  | 2.21734200  | -3.53722400 | -2.66716200 |
| C  | -0.42631800 | -0.97009500 | -1.70639000 |
| C  | 5.14539000  | 1.62922700  | 0.02026700  |
| C  | 3.87026000  | 2.26957200  | 0.12637000  |
| C  | 3.81896400  | 3.67868600  | 0.08493000  |
| C  | 4.95433200  | 4.47008800  | -0.06013100 |
| C  | 6.19939100  | 3.81507000  | -0.19320400 |
| C  | 6.29045900  | 2.43219700  | -0.15525400 |
| C  | 2.60808200  | 1.56218900  | 0.35187500  |
| C  | -0.99218400 | -0.24595400 | 3.11091300  |
| H  | 4.05945600  | -2.24946100 | 3.73088700  |
| C  | -2.74657300 | -1.01938600 | 5.22908400  |
| C  | -1.34222200 | -1.10402500 | 5.36682000  |
| C  | -0.49255200 | -0.73147700 | 4.33772600  |
| C  | 3.54343600  | -1.90980900 | 2.82379000  |
| C  | -0.80377600 | -3.65542500 | 0.62365700  |
| C  | -2.15070600 | -3.00288100 | 0.30475600  |
| H  | -0.63745400 | -2.53577400 | 2.33725100  |
| H  | -1.00134700 | -1.90823500 | -4.05522900 |
| H  | 3.14520600  | -3.96064400 | -2.27496100 |
| H  | 2.84318400  | 4.14255600  | 0.22754300  |
| H  | 0.64125900  | 4.11905300  | -1.36518900 |
| H  | -0.91581700 | -1.46085200 | 6.30642600  |
| H  | 0.59166300  | -0.80428800 | 4.44698300  |
| H  | -0.22120400 | -3.75666300 | -0.29736100 |
| H  | -0.95140000 | -4.66174100 | 1.03374400  |

|   |             |             |             |
|---|-------------|-------------|-------------|
| H | -1.99128700 | -1.92725100 | 0.17723400  |
| H | -2.82043900 | -3.11315500 | 1.16748800  |
| H | 0.68885200  | -3.39237300 | 2.00657300  |
| H | -2.22549900 | -5.53467200 | -0.74352500 |
| H | -3.84591500 | -5.10358600 | 1.10508000  |
| N | -0.03149200 | -2.82356800 | 1.56642800  |
| H | 0.19578700  | -3.61663100 | -5.43161700 |
| H | 2.28461900  | -4.66111800 | -4.49186900 |
| O | 5.16300200  | -2.61846300 | -1.16688800 |
| H | 5.01242000  | -3.52736000 | -0.88344400 |
| H | 7.25409300  | 1.92898700  | -0.25671000 |
| H | -4.71844800 | -0.48260400 | 2.15771700  |
| H | -5.82410100 | 3.79665800  | -0.52102400 |

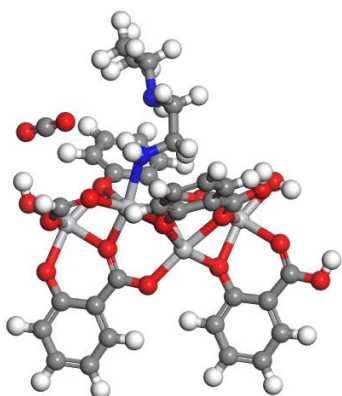

#### Ti-(B) Complex

-1 1

|    |    |             |             |             |
|----|----|-------------|-------------|-------------|
| H  | 0  | -8.06617100 | 2.19889300  | -1.02208400 |
| Ti | -1 | -2.58965800 | -1.93404400 | -1.56908700 |
| O  | -1 | -2.61925300 | -3.94948300 | -2.08179400 |
| O  | -1 | -3.25150400 | 0.03533500  | -1.05596200 |
| O  | -1 | -4.53134700 | -2.38991500 | -0.82430300 |
| O  | -1 | -6.76266100 | -2.36531800 | -0.72032700 |
| O  | -1 | -2.10475200 | -1.86505800 | 0.52571400  |
| O  | -1 | -2.64829300 | -3.88907600 | 1.29819000  |
| H  | 0  | -3.38401600 | -4.24320200 | -1.57289100 |
| C  | -1 | -4.49962300 | 0.54530700  | -1.06407300 |
| C  | -1 | -5.67103900 | -0.27047800 | -0.97482500 |
| C  | -1 | -6.93203700 | 0.36082600  | -0.96278000 |
| C  | -1 | -7.08291500 | 1.74176800  | -1.04182700 |
| C  | -1 | -5.91289300 | 2.52651500  | -1.15294100 |
| C  | -1 | -5.65099600 | -1.72724700 | -0.83212300 |
| C  | -1 | -1.61705200 | -3.34981200 | 3.81591300  |
| C  | -1 | -2.12784300 | -2.73625300 | 1.49418900  |
| H  | 0  | -1.07322300 | -3.94966200 | 5.82014600  |
| C  | 0  | 4.99759500  | -3.91707800 | -2.29634700 |
| H  | -1 | -7.80511700 | -0.27949800 | -0.83852200 |
| H  | -1 | -2.16450600 | -4.26609700 | 3.59164100  |

|    |    |             |             |             |
|----|----|-------------|-------------|-------------|
| H  | 0  | 2.73742200  | -3.30205200 | -1.47400200 |
| H  | 0  | 4.01417800  | -5.40713200 | -1.11238100 |
| H  | 0  | 4.25543800  | -3.92384800 | -3.10231600 |
| H  | 0  | 5.82054000  | -4.57441500 | -2.59110200 |
| H  | 0  | -2.95049100 | 6.84179200  | 0.28768800  |
| H  | -1 | -5.99927600 | 3.61095300  | -1.24474800 |
| Ti | -1 | 2.52641100  | 2.70853500  | -0.25120700 |
| Ti | -1 | -1.77874600 | 0.22592000  | 0.42960100  |
| Ti | 0  | 1.05009500  | 0.40232600  | 0.79862900  |
| O  | 0  | 2.45939900  | 0.69842800  | -0.76445200 |
| O  | 0  | -0.05715900 | -0.29794500 | -0.65425000 |
| O  | -1 | -0.80601200 | -1.36560000 | -2.46994300 |
| O  | -1 | 1.86456500  | 4.67791200  | 0.26191800  |
| O  | 0  | 0.58713300  | 2.29994000  | 0.26503700  |
| O  | -1 | -1.64659300 | 2.27725900  | 0.59755300  |
| O  | 0  | -0.60461800 | -0.26076200 | 2.07101900  |
| O  | -1 | 3.01131600  | 2.77752000  | 1.84359400  |
| O  | 0  | 2.32167000  | 0.84230000  | 2.72743100  |
| O  | 0  | 5.20202900  | -0.64087200 | 1.31221500  |
| O  | 0  | 6.23023600  | 0.96100900  | -0.03172600 |
| C  | -1 | 2.54570900  | 0.12852800  | -1.98704400 |
| C  | -1 | 1.45670600  | -0.61700300 | -2.53939900 |
| C  | -1 | 1.59960800  | -1.17451300 | -3.82466100 |
| C  | -1 | 2.76517700  | -1.04356300 | -4.57343600 |
| C  | -1 | 3.82940800  | -0.30527900 | -4.00718800 |
| C  | -1 | 3.71765000  | 0.27196100  | -2.75329700 |
| C  | -1 | 0.17835900  | -0.79829100 | -1.86285000 |
| C  | -1 | 0.61644600  | 5.18788500  | 0.25380700  |
| C  | -1 | -0.55497000 | 4.37209800  | 0.34305600  |
| C  | -1 | -1.81589500 | 5.00347000  | 0.35511900  |
| C  | -1 | -1.96677300 | 6.38441200  | 0.27607100  |
| C  | -1 | -0.79675100 | 7.16915800  | 0.16495800  |
| C  | -1 | -4.65607600 | 1.94246300  | -1.16418400 |
| C  | -1 | -0.53492800 | 2.91533100  | 0.48575700  |
| C  | -1 | -0.72958300 | -1.21682500 | 3.00279800  |
| C  | -1 | -1.52149200 | -2.39480500 | 2.78477400  |
| C  | -1 | -0.98785900 | -3.19297700 | 5.04803900  |
| C  | -1 | -0.24313700 | -2.00934100 | 5.25695200  |
| C  | -1 | -0.11852400 | -1.05137600 | 4.26270700  |
| C  | -1 | 2.98822700  | 1.90632500  | 2.81206900  |
| C  | 0  | 5.71048000  | 0.16117700  | 0.63824900  |
| C  | 0  | 1.35592400  | -2.87807000 | 0.71250900  |
| C  | 0  | 2.38646100  | -3.95462500 | 0.40155700  |
| C  | 0  | 4.38763900  | -4.37429300 | -0.97830800 |
| C  | 0  | 5.43956500  | -4.39163900 | 0.12529900  |
| H  | -1 | 0.73373900  | -1.69121500 | -4.23967700 |

|   |    |             |             |             |
|---|----|-------------|-------------|-------------|
| H | -1 | 4.54371900  | 0.83866100  | -2.31881900 |
| H | -1 | -2.68904800 | 4.36307900  | 0.47935800  |
| H | -1 | -3.75318900 | 2.55044100  | -1.25178100 |
| H | -1 | 0.23850700  | -1.84259300 | 6.22219300  |
| H | -1 | 0.46577700  | -0.14277700 | 4.42384500  |
| H | 0  | 0.69728700  | -3.19529400 | 1.52320800  |
| H | 0  | 1.86644700  | -4.88961900 | 0.12827300  |
| H | 0  | 0.72885100  | -2.70412900 | -0.16891200 |
| H | 0  | 2.85978500  | -1.55456600 | 0.53742300  |
| H | 0  | 2.96914300  | -4.16684900 | 1.30550900  |
| H | 0  | 2.29135000  | -1.64226800 | 2.05679800  |
| H | 0  | 5.38618900  | -2.89714800 | -2.20281800 |
| H | 0  | 6.27180600  | -5.04481500 | -0.15457700 |
| H | 0  | 5.03903200  | -4.76003500 | 1.07423200  |
| H | 0  | 5.82935400  | -3.38131600 | 0.28926100  |
| N | 0  | 1.99480900  | -1.60235700 | 1.08267200  |
| N | 0  | 3.28682400  | -3.47192300 | -0.63416300 |
| H | 0  | 2.84718700  | -1.48084900 | -5.56308900 |
| H | -1 | 4.76479400  | -0.20111300 | -4.55999200 |
| H | -1 | -0.88320800 | 8.25353000  | 0.07313100  |
| O | -1 | 4.31005700  | 3.27697800  | -1.15206200 |
| H | 0  | 5.05462200  | 2.71030000  | -0.92220800 |
| C | -1 | 0.46006600  | 6.58510600  | 0.15371500  |
| H | 0  | 3.54591000  | 2.13931800  | 3.72798400  |
| H | -1 | 1.36288000  | 7.19301900  | 0.06609800  |
| H | 0  | -2.26370500 | -4.56227900 | 1.87240300  |
| H | 0  | -6.56321700 | -3.31184400 | -0.66977200 |

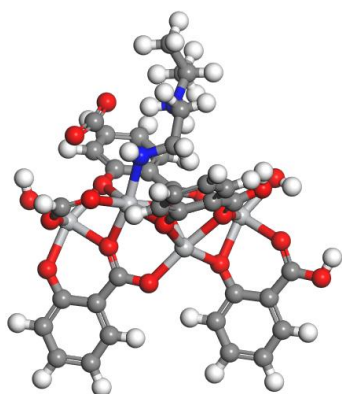

Ti-(C) TS<sub>1</sub>

|    |   |             |             |             |
|----|---|-------------|-------------|-------------|
| -1 | 1 |             |             |             |
| H  |   | -7.93164500 | 1.94780400  | -1.41387100 |
| Ti |   | -2.31565700 | -2.03159900 | -1.41817000 |
| O  |   | -2.26468300 | -4.08231600 | -1.76124400 |
| O  |   | -3.05587300 | -0.04975100 | -1.09545100 |
| O  |   | -4.26975000 | -2.48890800 | -0.70749100 |
| O  |   | -6.50313200 | -2.53014000 | -0.68546600 |
| O  |   | -1.91355300 | -1.77400000 | 0.67945700  |

|    |             |             |             |
|----|-------------|-------------|-------------|
| O  | -2.42482200 | -3.74440000 | 1.59866000  |
| H  | -3.04531800 | -4.35427400 | -1.26450300 |
| C  | -4.31761200 | 0.41596900  | -1.19063000 |
| C  | -5.46639100 | -0.42823400 | -1.07523900 |
| C  | -6.74543200 | 0.15957000  | -1.16095200 |
| C  | -6.93484700 | 1.52349800  | -1.36054200 |
| C  | -5.78568600 | 2.33493500  | -1.49516200 |
| C  | -5.40779900 | -1.86679600 | -0.81057500 |
| C  | -1.50742700 | -2.96531900 | 4.09758200  |
| C  | -1.94733400 | -2.56265100 | 1.71596400  |
| H  | -1.02337000 | -3.37905000 | 6.16352000  |
| C  | 3.46328400  | -4.50065800 | -2.80315600 |
| H  | -7.60287300 | -0.49704500 | -1.01474700 |
| H  | -2.01795400 | -3.91469700 | 3.93137700  |
| H  | 1.88072200  | -3.19845200 | -1.21039300 |
| H  | 2.46580000  | -5.53438300 | -1.20380400 |
| H  | 2.54199600  | -4.18570200 | -3.30010100 |
| H  | 3.81373600  | -5.41694500 | -3.28430000 |
| H  | -3.01229700 | 6.85081400  | -0.31586100 |
| H  | -5.90123300 | 3.40463000  | -1.68036400 |
| Ti | 2.60358200  | 2.87162700  | -0.31183800 |
| Ti | -1.64746000 | 0.31162400  | 0.42047000  |
| Ti | 1.20489600  | 0.55300600  | 0.88494000  |
| O  | 2.59914800  | 0.86324800  | -0.68470900 |
| O  | 0.13309400  | -0.24222900 | -0.54675500 |
| O  | -0.51685000 | -1.48029600 | -2.29931800 |
| O  | 1.86336500  | 4.85347400  | 0.01088000  |
| O  | 0.65448500  | 2.43882000  | 0.16889700  |
| O  | -1.58389400 | 2.37308500  | 0.42086600  |
| O  | -0.53529500 | 0.00824600  | 2.13831700  |
| O  | 3.00568500  | 3.12922500  | 1.78578900  |
| O  | 2.30962400  | 1.27507900  | 2.82861400  |
| O  | 4.65012800  | -0.03568300 | 1.55866500  |
| O  | 4.73656700  | -1.76851800 | 0.01767000  |
| C  | 2.76724800  | 0.15934700  | -1.82401800 |
| C  | 1.72320600  | -0.66504200 | -2.35051500 |
| C  | 1.93196000  | -1.32156800 | -3.57873900 |
| C  | 3.12083000  | -1.21406700 | -4.29385700 |
| C  | 4.13981700  | -0.39657500 | -3.75380000 |
| C  | 3.96277400  | 0.27805300  | -2.55735900 |
| C  | 0.42597700  | -0.83239300 | -1.70713000 |
| C  | 0.60162600  | 5.31919400  | -0.08429800 |
| C  | -0.54715200 | 4.47499000  | 0.03109300  |
| C  | -1.82612300 | 5.06286500  | -0.05460400 |
| C  | -2.01553900 | 6.42679300  | -0.25419500 |
| C  | -0.86637700 | 7.23823000  | -0.38881400 |

|   |             |             |             |
|---|-------------|-------------|-------------|
| C | -4.51228000 | 1.79412300  | -1.41275200 |
| C | -0.48856100 | 3.03642900  | 0.29575600  |
| C | -0.65437900 | -0.87827900 | 3.14104300  |
| C | -1.40139900 | -2.09594200 | 2.99424200  |
| C | -0.93086000 | -2.68655000 | 5.33389700  |
| C | -0.23079300 | -1.46557700 | 5.46947100  |
| C | -0.09724700 | -0.58924400 | 4.40366000  |
| C | 2.97190500  | 2.34057400  | 2.82229600  |
| C | 4.50202500  | -0.92174900 | 0.80847600  |
| C | 1.43889300  | -2.51327600 | 1.22227800  |
| C | 2.26807600  | -3.70332100 | 0.75461400  |
| C | 3.24426100  | -4.77419400 | -1.32645500 |
| C | 4.51586400  | -5.21640200 | -0.62207100 |
| H | 1.09861600  | -1.89927900 | -3.97965700 |
| H | 4.75411000  | 0.90584400  | -2.14265800 |
| H | -2.68363400 | 4.40618000  | 0.09158500  |
| H | -3.62549300 | 2.42253600  | -1.51868100 |
| H | 0.20831100  | -1.20385700 | 6.43392200  |
| H | 0.45273100  | 0.34850000  | 4.50894700  |
| H | 1.00476300  | -2.82066600 | 2.18349600  |
| H | 1.68925800  | -4.62976100 | 0.81395200  |
| H | 0.58887400  | -2.41618400 | 0.53243100  |
| H | 3.37553000  | -2.77477200 | -0.69653200 |
| H | 3.17785400  | -3.81121700 | 1.34789600  |
| H | 2.51742400  | -1.15621900 | 2.25451400  |
| H | 4.21589000  | -3.72173200 | -2.95819900 |
| H | 4.91608100  | -6.08992300 | -1.14203900 |
| H | 4.34092700  | -5.50269600 | 0.41718900  |
| H | 5.27530200  | -4.42898400 | -0.64949500 |
| N | 2.14605400  | -1.24843200 | 1.31024300  |
| N | 2.68379100  | -3.53997200 | -0.67007800 |
| H | 3.25376700  | -1.72913400 | -5.23986300 |
| H | 5.09209100  | -0.30725700 | -4.27971600 |
| H | -0.98199500 | 8.30785400  | -0.57403300 |
| O | 4.40238800  | 3.42293000  | -1.19298600 |
| H | 5.15467100  | 2.89733100  | -0.89859800 |
| C | 0.40702900  | 6.69741800  | -0.30640400 |
| H | 3.51708600  | 2.65791000  | 3.72140400  |
| H | 1.29374600  | 7.32576200  | -0.41235000 |
| H | -2.03640900 | -4.35280500 | 2.23907200  |
| H | -6.27618800 | -3.46161800 | -0.54933000 |

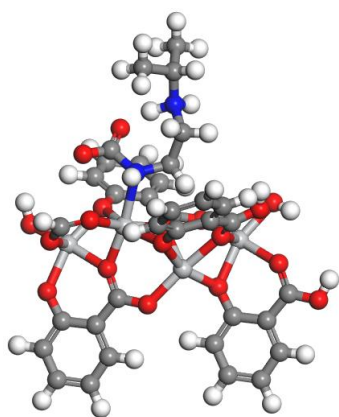

Ti-(D) Intermediate from Gaussian

-1 1

|    |             |             |             |
|----|-------------|-------------|-------------|
| H  | -8.19568700 | -1.74138500 | -0.30600100 |
| Ti | -1.51045000 | -2.65956800 | -1.66151100 |
| O  | -0.62805500 | -4.40999000 | -2.35659200 |
| O  | -2.97240500 | -1.28574500 | -0.91646700 |
| O  | -2.89702800 | -4.03479000 | -0.81366500 |
| O  | -4.83870900 | -5.10345700 | -0.53437000 |
| O  | -0.88388200 | -2.45571800 | 0.38640100  |
| O  | -0.29878900 | -4.52026400 | 1.00617600  |
| H  | -1.12503300 | -5.06988500 | -1.85853400 |
| C  | -4.30394700 | -1.44762100 | -0.77961100 |
| C  | -4.92204900 | -2.73328000 | -0.67608200 |
| C  | -6.32068500 | -2.79644000 | -0.50686900 |
| C  | -7.12305400 | -1.66139800 | -0.44442600 |
| C  | -6.49376400 | -0.40253900 | -0.57245300 |
| C  | -4.18995500 | -4.00094100 | -0.67224400 |
| C  | 0.62570600  | -3.65889600 | 3.47529400  |
| C  | -0.37638700 | -3.26977900 | 1.26799700  |
| H  | 1.61374900  | -4.00572600 | 5.36651500  |
| C  | 6.94622400  | -3.21379200 | -1.36532300 |
| H  | -6.75933000 | -3.78539700 | -0.37541900 |
| H  | 0.56318800  | -4.71487800 | 3.20963500  |
| H  | 4.47813900  | -2.89465800 | -1.32346800 |
| H  | 5.94004900  | -3.97315800 | 0.37824500  |
| H  | 6.44360400  | -3.89898700 | -2.05501500 |
| H  | 7.91735200  | -3.64556600 | -1.11262500 |
| H  | -5.82124700 | 4.74068300  | 1.03217000  |
| H  | -7.09929600 | 0.50572300  | -0.55542800 |
| Ti | 0.86514400  | 3.82235100  | -0.31771500 |
| Ti | -1.61363700 | -0.46836400 | 0.46116600  |
| Ti | 0.90830400  | 1.14773800  | 0.59064900  |
| O  | 1.71617500  | 2.06962800  | -1.03093500 |
| O  | 0.11190500  | -0.08276200 | -0.77363600 |
| O  | -0.33308300 | -1.25613400 | -2.64143000 |
| O  | -0.59681100 | 5.19617300  | 0.42732700  |



|   |             |             |             |
|---|-------------|-------------|-------------|
| O | -0.55256700 | 2.50004000  | 0.35887500  |
| O | -2.46311600 | 1.37846100  | 0.80942500  |
| O | -0.14649100 | -0.39831400 | 1.93854300  |
| O | 1.49171200  | 4.02620000  | 1.73019600  |
| O | 1.83376000  | 1.96823100  | 2.51764500  |
| O | 4.31334200  | 1.57081500  | 0.97289800  |
| O | 4.59763700  | 0.08799100  | -0.68857800 |
| C | 1.92199400  | 1.65695900  | -2.28344200 |
| C | 1.26912600  | 0.50095300  | -2.81659600 |
| C | 1.51495500  | 0.14061400  | -4.15557400 |
| C | 2.38148800  | 0.85491000  | -4.97731900 |
| C | 3.01785000  | 1.99193000  | -4.42912300 |
| C | 2.78610400  | 2.38601700  | -3.12186400 |
| C | 0.32039500  | -0.30895200 | -2.06246400 |
| C | -1.92835400 | 5.03429700  | 0.56418500  |
| C | -2.54645400 | 3.74863700  | 0.66771300  |
| C | -3.94505700 | 3.68557100  | 0.83694500  |
| C | -4.74742700 | 4.82061200  | 0.89938700  |
| C | -4.11813600 | 6.07947200  | 0.77136200  |
| C | -5.12133100 | -0.30021800 | -0.73612500 |
| C | -1.81436100 | 2.48097700  | 0.67155000  |
| C | 0.28304000  | -1.33015400 | 2.79858600  |
| C | 0.13398000  | -2.73368700 | 2.53369400  |
| C | 1.23783100  | -3.27020300 | 4.66392200  |
| C | 1.34208500  | -1.88429000 | 4.92397500  |
| C | 0.87840900  | -0.94399100 | 4.01700900  |
| C | 1.99920700  | 3.21213900  | 2.61179200  |
| C | 4.01512300  | 0.56321900  | 0.33465700  |
| C | 2.62178400  | -1.52899700 | 0.27546500  |
| C | 3.72603100  | -2.54443800 | 0.55287500  |
| C | 6.13775800  | -3.00497500 | -0.09542000 |
| C | 6.83686900  | -2.07668800 | 0.88490500  |
| H | 0.96212700  | -0.71321600 | -4.54838800 |
| H | 3.28253500  | 3.26325500  | -2.70195700 |
| H | -4.38373500 | 2.69652100  | 0.96837600  |
| H | -4.63708100 | 0.67340200  | -0.83653400 |
| H | 1.79078000  | -1.54697900 | 5.86012100  |
| H | 0.96951300  | 0.12599200  | 4.21641400  |
| H | 1.69756100  | -1.90035100 | 0.71443700  |
| H | 3.32911600  | -3.56206100 | 0.53100200  |
| H | 2.44550500  | -1.45170900 | -0.80169000 |
| H | 4.84531100  | -1.36239900 | -0.68009600 |
| H | 4.16973900  | -2.37663000 | 1.53679400  |
| H | 2.83446300  | -0.16329600 | 1.81678200  |
| H | 7.12061500  | -2.26334200 | -1.87966000 |
| H | 7.80988200  | -2.49990200 | 1.14498900  |

|   |             |             |             |
|---|-------------|-------------|-------------|
| H | 6.27675300  | -1.94800200 | 1.81478900  |
| H | 6.99715400  | -1.09165600 | 0.43621100  |
| N | 2.83034600  | -0.17490300 | 0.79676800  |
| N | 4.80320000  | -2.43820300 | -0.47034400 |
| H | 2.55295000  | 0.55485000  | -6.00575200 |
| H | 3.71915600  | 2.56223900  | -5.04093100 |
| H | -4.72370300 | 6.98764000  | 0.78836600  |
| O | 2.04251000  | 5.22578500  | -1.29763500 |
| H | 2.98854500  | 5.07207800  | -1.19624100 |
| C | -2.74570300 | 6.18179300  | 0.60768900  |
| H | 2.53296500  | 3.63891600  | 3.46961000  |
| H | -2.26148700 | 7.15532100  | 0.50726000  |
| H | 0.44574400  | -4.93904600 | 1.45543200  |
| H | -4.20524400 | -5.83422100 | -0.58914000 |

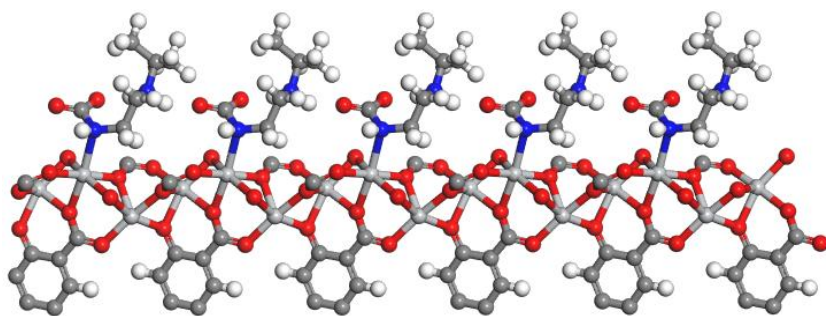

Ti-(D) Intermediate from VASP

1.00000000000000

|                      |                     |                     |
|----------------------|---------------------|---------------------|
| 21.2408511899911439  | -0.0070465763888699 | 0.0109184656030698  |
| -11.2993657443522491 | 19.1615746572036123 | -0.0270262075373670 |
| -0.0018022982301560  | -0.0126670242332498 | 7.0331150772993825  |

| Ti | O  | C  | H  | N |
|----|----|----|----|---|
| 6  | 20 | 48 | 32 | 2 |

Direct

|                    |                    |                    |
|--------------------|--------------------|--------------------|
| 0.3328212641129440 | 0.7426798137692927 | 0.8497137944999764 |
| 0.2645598156920741 | 0.6452644176606910 | 0.1888037371605478 |
| 0.3773003983300995 | 0.6835946580653598 | 0.5174627168855821 |
| 0.6974258806938138 | 0.3586251318811833 | 0.2183716846562689 |
| 0.5917150646637452 | 0.2889557405534831 | 0.8847014425007842 |
| 0.6252907368064058 | 0.3891793833561508 | 0.5524499675226622 |
| 0.4143860708546825 | 0.7847153453766182 | 0.6441240644677606 |
| 0.3628762836104755 | 0.7378185005838276 | 0.2895529107342156 |
| 0.3834347422531295 | 0.8164291452322487 | 0.0641274613743477 |
| 0.2272021128199029 | 0.6869086285260977 | 0.9793931627223031 |
| 0.2729531617495482 | 0.6720294055352412 | 0.6254131889206960 |
| 0.1878065831309428 | 0.6212542506164880 | 0.3993482268312434 |
| 0.3211033607923781 | 0.5993062792436845 | 0.3145996804864524 |
| 0.3338027217869026 | 0.6532229697025258 | 0.9614127088398803 |
| 0.3876093706847143 | 0.6242369975716500 | 0.7355274749587366 |
| 0.5602216719698987 | 0.7701723916350716 | 0.7007459127392295 |

|                    |                    |                    |
|--------------------|--------------------|--------------------|
| 0.5706047359420907 | 0.8317879452043471 | 0.4326180619826658 |
| 0.7321975379173722 | 0.4379830776620466 | 0.4249240673140804 |
| 0.6873070439910052 | 0.3826998678300981 | 0.7790090276346930 |
| 0.7724553848906552 | 0.4096623142624836 | 0.0023826397958686 |
| 0.6405459724519176 | 0.2564606030240455 | 0.0895945484147447 |
| 0.6277636147856498 | 0.2989842662728179 | 0.4445696610743965 |
| 0.5692257206009970 | 0.2175975682034661 | 0.6667473606429581 |
| 0.5416855634232292 | 0.3427955599869463 | 0.7574735315399934 |
| 0.5995785354083907 | 0.3551250989508219 | 0.1122014697144920 |
| 0.5741325730928253 | 0.4113264036842637 | 0.3354237966664755 |
| 0.4468182137392489 | 0.8485464527385460 | 0.5641016439181499 |
| 0.4391657995725993 | 0.8591358574948416 | 0.3668724060415158 |
| 0.4752640912574577 | 0.9277548116920755 | 0.2956274720738037 |
| 0.5188888875421611 | 0.9856986783732111 | 0.4089697886671004 |
| 0.5258023013563005 | 0.9740111630176429 | 0.6033303853310201 |
| 0.4903075679699214 | 0.9073271232713225 | 0.6788178851935172 |
| 0.3937987498143656 | 0.8027528289374999 | 0.2352364408099135 |
| 0.1605465114688442 | 0.6570829429441076 | 0.8977486527524832 |
| 0.1481446452993538 | 0.6363859097586442 | 0.7022378187962843 |
| 0.0761047045565419 | 0.6042339142901483 | 0.6311853995103434 |
| 0.0167896527784492 | 0.5922203323086777 | 0.7430316546236355 |
| 0.0305104674572831 | 0.6142062627307325 | 0.9349103752490606 |
| 0.1005332855657244 | 0.6458006946715216 | 0.0099937193934139 |
| 0.2051069508869290 | 0.6434185407265858 | 0.5714028137549363 |
| 0.3426992430152396 | 0.5586458288136242 | 0.2296894126988320 |
| 0.3608319405145508 | 0.5635187239830515 | 0.0314316759856723 |
| 0.3876403527249721 | 0.5217054200909104 | 0.9590174807924114 |
| 0.3965168248791286 | 0.4750587782951428 | 0.0712524691435021 |
| 0.3764623913478005 | 0.4696002446495626 | 0.2648990972540162 |
| 0.3503714928699750 | 0.5102391963733979 | 0.3415794033018926 |
| 0.3604639940331609 | 0.6150810410342942 | 0.9027144142760903 |
| 0.5476005641198398 | 0.7766645147811886 | 0.5296687702841609 |
| 0.5045000986980384 | 0.7040733930657481 | 0.2243632342993749 |
| 0.5807706823720622 | 0.7450694394137756 | 0.1347170638663400 |
| 0.7984447205639498 | 0.4753332623164468 | 0.5080092090669623 |
| 0.8115895077855200 | 0.4675362754265677 | 0.7035253073888654 |
| 0.8833565030379376 | 0.5073388294432775 | 0.7751615777780785 |
| 0.9419160624142648 | 0.5545763088564399 | 0.6640722092270153 |
| 0.9274773461920560 | 0.5624806676072964 | 0.4724898846896082 |
| 0.8577186695285448 | 0.5238881437588390 | 0.3967269768810695 |
| 0.7553356076157485 | 0.4181640371945150 | 0.8332567565620153 |
| 0.6136740152040048 | 0.1934919547366647 | 0.1728584036386422 |
| 0.5917001839359699 | 0.1807300524593458 | 0.3680574512159822 |
| 0.5616698983349053 | 0.1124471206651450 | 0.4395541732630619 |
| 0.5536456068434958 | 0.0568871833169453 | 0.3293378065634229 |
| 0.5773169688549658 | 0.0709894036624590 | 0.1383134927417800 |

|                    |                    |                    |
|--------------------|--------------------|--------------------|
| 0.6062627575710167 | 0.1373115472898760 | 0.0622800718141576 |
| 0.5960291338652368 | 0.2340896187542540 | 0.4981365600790113 |
| 0.5056636061915256 | 0.3715378975294428 | 0.8394886105221318 |
| 0.5151625809443772 | 0.3928513263403630 | 0.0346809107082180 |
| 0.4773864343364380 | 0.4251346402315690 | 0.1046732277315670 |
| 0.4304713326464835 | 0.4365691486141401 | 0.9927169765636563 |
| 0.4203272312177262 | 0.4135130270352576 | 0.8017871907363414 |
| 0.4569533160036414 | 0.3819273697770456 | 0.7275339985015066 |
| 0.5646969180168782 | 0.3863366861854090 | 0.1657242567840669 |
| 0.6724734034481656 | 0.8688327589670806 | 0.0173102278557664 |
| 0.6697483412377139 | 0.9306380962623066 | 0.9328260718949153 |
| 0.7249536112537953 | 0.8893538048785814 | 0.1851912748522579 |
| 0.4660268442260360 | 0.9343376725484731 | 0.1465933869222695 |
| 0.5605169385156756 | 0.0182516756661713 | 0.6954576840807007 |
| 0.4959627743780004 | 0.8985530767822283 | 0.8289420943394035 |
| 0.0677326558788636 | 0.5863832888418230 | 0.4839408311215863 |
| 0.9853350921837887 | 0.6068288431688345 | 0.0252749348842087 |
| 0.1110390960201215 | 0.6628294392830725 | 0.1582296488433457 |
| 0.4046864920887927 | 0.5294753523227058 | 0.8104806919978600 |
| 0.3812753844542911 | 0.4324257132578850 | 0.3557650695710350 |
| 0.3354387410221875 | 0.5062722256018404 | 0.4915530465692939 |
| 0.4822863689455943 | 0.6485016481594243 | 0.1948442431375241 |
| 0.5833884234760660 | 0.7185530926161832 | 0.0058109214725093 |
| 0.8922476422074368 | 0.4980830608323643 | 0.9222122315718906 |
| 0.9719822251827921 | 0.6001005587594790 | 0.3826451834441684 |
| 0.8468932357177010 | 0.5301308337150630 | 0.2484791707565464 |
| 0.5424389272953292 | 0.1038664147123072 | 0.5861718075373830 |
| 0.5732556313409347 | 0.0289900311268454 | 0.0487254095629623 |
| 0.6242827581872561 | 0.1477802726497472 | 0.9144210152691556 |
| 0.4883472614124713 | 0.4435443704026127 | 0.2514195364504062 |
| 0.3824777354444748 | 0.4200339529156238 | 0.7112636948537912 |
| 0.4489453705802546 | 0.3642625655103586 | 0.5798407015723868 |
| 0.4681220829390043 | 0.7181613681010575 | 0.1501428765746198 |
| 0.5636020602401857 | 0.8076951429406236 | 0.9550877786682221 |
| 0.5799128765616430 | 0.8333214556670114 | 0.1988687593342675 |
| 0.6232498630607708 | 0.7515514200953248 | 0.2351990846155090 |
| 0.5001404992567942 | 0.6715810953993113 | 0.5043059485337551 |
| 0.6866530597280445 | 0.8433150382585808 | 0.9045393848677463 |
| 0.6516672340642913 | 0.9548068420613234 | 0.0400303055841320 |
| 0.6328741149551007 | 0.9142737853057383 | 0.8093717792046746 |
| 0.7244991807974515 | 0.9704693900144079 | 0.8849451674024635 |
| 0.7795529027657366 | 0.9304452511050698 | 0.1400530883201370 |
| 0.7300477387951503 | 0.8456010101052911 | 0.2379582585331832 |
| 0.7069890606125213 | 0.9093226820300089 | 0.3038459871612247 |
| 0.4979281242137148 | 0.7102759240876324 | 0.4320616781314470 |
| 0.5955325941113898 | 0.8156982447991226 | 0.0757143659515549 |

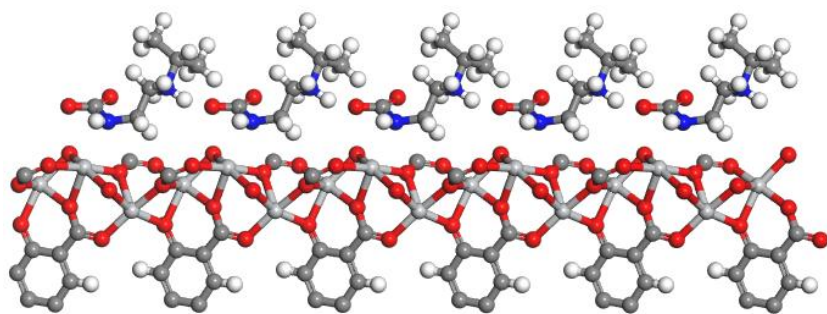

Ti-(E) TS<sub>2</sub>

```

1.0000000000000000
 21.0335198964802039   0.0000000000000000   0.0000000000000000
-11.5484741769940822  19.1182256162988615   0.0000000000000000
  0.1100376056476645   0.0425309955481925   7.0329560625631462

```

```

Ti   O   C   H   N
  6   20  48  32   2

```

Direct

```

0.3403688160164537  0.7457229197040538  0.8304697391874299
0.2669055236410997  0.6501946501270449  0.1695638576358832
0.3814337206560778  0.6824545981716205  0.4889029992820857
0.6961280571611511  0.3619967767161762  0.2114508992071900
0.5898071458951569  0.2889561874045963  0.8784596441510308
0.6217769376163891  0.3894856928081477  0.5439202212735799
0.4230336168803034  0.7846399967274104  0.6204122079539973
0.3711860117651964  0.7399646624593779  0.2658650822911087
0.3953099089446991  0.8199764360577469  0.0421560147912851
0.2321961570134710  0.6941093201390133  0.9632646498135675
0.2780904522177243  0.6774855659954201  0.6073644463455438
0.1912210643688111  0.6295833899379289  0.3847483816800579
0.3164325189889416  0.5985026464319541  0.2944549918066650
0.3339742640933269  0.6527879822261120  0.9392022291136692
0.3819309465812027  0.6176206074718934  0.7098028793843784
0.5450507864625460  0.7495966189896773  0.5857532095975757
0.5735941830594868  0.8184940229588167  0.3190148140450970
0.7316222389250000  0.4417132012143051  0.4158236997461102
0.6850020589726716  0.3850195748313472  0.7699984564776918
0.7710249869221147  0.4140290635140277  0.9919427230009691
0.6415506392186906  0.2601177460461941  0.0825234867142489
0.6259779337964211  0.3000149291473739  0.4384831092043047
0.5690851375080640  0.2175256645830183  0.6625981753335777
0.5364963159763987  0.3391762020738869  0.7518739342491351
0.5953868104415510  0.3540499991935501  0.1056633597471215
0.5685780076503932  0.4096968633246861  0.3277037055446805
0.4545590730929749  0.8492696845975638  0.5436650089844428
0.4488826180153448  0.8612587406591500  0.3466415759177705
0.4840189112249864  0.9306484886386374  0.2793144877994993
0.5243644139135210  0.9883458954003762  0.3962441515235618

```

|                    |                    |                    |
|--------------------|--------------------|--------------------|
| 0.5285716556434114 | 0.9753559097474034 | 0.5905715715429533 |
| 0.4942285043606575 | 0.9077512069685969 | 0.6622104517624843 |
| 0.4043059533372944 | 0.8053120462416697 | 0.2129359247328553 |
| 0.1645105552674858 | 0.6647084275516038 | 0.8844964169300555 |
| 0.1520260198335064 | 0.6442882829136025 | 0.6895150044701671 |
| 0.0791439663554560 | 0.6128469758823115 | 0.6202457285587128 |
| 0.0188257559155926 | 0.6008609228614349 | 0.7334035673006242 |
| 0.0325335079992632 | 0.6222306191396075 | 0.9253456373419094 |
| 0.1034952324538800 | 0.6534412217975986 | 0.9985679873992844 |
| 0.2094426481346232 | 0.6506726174079513 | 0.5565410990826397 |
| 0.3374596309158264 | 0.5572023218136599 | 0.2111209741440251 |
| 0.3535794999864858 | 0.5590780375919313 | 0.0114116112125152 |
| 0.3792643016193160 | 0.5159320282448242 | 0.9421255415106895 |
| 0.3893099439217433 | 0.4713314281561100 | 0.0589083292367841 |
| 0.3709276263572139 | 0.4687284607875238 | 0.2541373001706224 |
| 0.3457122464273009 | 0.5104015852026885 | 0.3276972592234329 |
| 0.3555853860937928 | 0.6108193335512010 | 0.8787113854592395 |
| 0.5446535463532782 | 0.7612669199294226 | 0.4082100444415090 |
| 0.5125581945081261 | 0.6980332381315414 | 0.0939647678829710 |
| 0.5917690073836319 | 0.7452300725034560 | 0.0107346777761847 |
| 0.7983436849286677 | 0.4808227107559287 | 0.4984055804182433 |
| 0.8109163621557808 | 0.4731836446618451 | 0.6938556836829287 |
| 0.8831687130350006 | 0.5143878719369912 | 0.7658825590958422 |
| 0.9430921686187222 | 0.5629755111755732 | 0.6550536108654932 |
| 0.9292098883925352 | 0.5710093454183430 | 0.4635452105659426 |
| 0.8589109741598546 | 0.5311212303542741 | 0.3876016218088054 |
| 0.7537477096765749 | 0.4222070904399672 | 0.8234390006458154 |
| 0.6162590839873554 | 0.1972052497659333 | 0.1655622820368575 |
| 0.5932198817768247 | 0.1829371119152831 | 0.3611041536367197 |
| 0.5641859296761043 | 0.1143894643027439 | 0.4313842213640633 |
| 0.5584729620766166 | 0.0602356963308428 | 0.3196685812916688 |
| 0.5840883009635162 | 0.0762460419901828 | 0.1290222935579926 |
| 0.6118273730489869 | 0.1426939300484847 | 0.0540298706104980 |
| 0.5957372198517659 | 0.2350353960563732 | 0.4924885879548466 |
| 0.4997375773460264 | 0.3675567436354162 | 0.8337462295904637 |
| 0.5091420603992411 | 0.3897292201950381 | 0.0278388787597139 |
| 0.4707678853167985 | 0.4219597046854712 | 0.0960272377581803 |
| 0.4233749446456969 | 0.4324075253264546 | 0.9835480762324369 |
| 0.4130659196362945 | 0.4081568059860364 | 0.7943750256030823 |
| 0.4503294512755016 | 0.3767298435607108 | 0.7217316274214842 |
| 0.5593686336821161 | 0.3843912984280795 | 0.1588401232656010 |
| 0.6740162832745794 | 0.8646786105526140 | 0.8463946120519609 |
| 0.6637042531081808 | 0.9164215604053678 | 0.7293506290795118 |
| 0.7281139546139327 | 0.8992751255968595 | 0.0085807732545170 |
| 0.4763756949494081 | 0.9380405590847357 | 0.1301954662835883 |
| 0.5601720362813115 | 0.0192617278672651 | 0.6861912618194114 |

|                    |                    |                    |
|--------------------|--------------------|--------------------|
| 0.4974925062069430 | 0.8983063261579409 | 0.8129706825987467 |
| 0.0707768919929240 | 0.5952146760800959 | 0.4732421965404091 |
| 0.9866349188822358 | 0.6145785765451016 | 0.0175449286861615 |
| 0.1138447185350470 | 0.6699635779900307 | 0.1468153577550443 |
| 0.3954159628646139 | 0.5217459907633225 | 0.7922016397973780 |
| 0.3764890676280498 | 0.4330656813813856 | 0.3485929135385405 |
| 0.3322628321090729 | 0.5089331782956540 | 0.4788456211064828 |
| 0.4930261606008783 | 0.6439136996831404 | 0.0534370436541609 |
| 0.6032501653800809 | 0.7178507031092074 | 0.8982617761914080 |
| 0.8914173851041258 | 0.5048848400368278 | 0.9128250444463208 |
| 0.9747071328030064 | 0.6096621216566785 | 0.3735356741554464 |
| 0.8487840833120798 | 0.5375885749313519 | 0.2393915441456782 |
| 0.5438822897793611 | 0.1045036724469762 | 0.5782409276405576 |
| 0.5825851267176949 | 0.0356406404653966 | 0.0389957091167821 |
| 0.6311042672061002 | 0.1545497133375999 | 0.9062870954053911 |
| 0.4817967087400367 | 0.4412260132045414 | 0.2415079966752109 |
| 0.3746854213754622 | 0.4137460462067397 | 0.7039943540544220 |
| 0.4424214781112242 | 0.3583831185892753 | 0.5751145390061941 |
| 0.4754770090686997 | 0.7119045942603764 | 0.0233105821054723 |
| 0.5653341656267536 | 0.7910513264038574 | 0.7942185439404165 |
| 0.5788942749049204 | 0.8293109636657616 | 0.0217941180393732 |
| 0.6337794738522506 | 0.7620713024369090 | 0.1207709709273370 |
| 0.5008433390491306 | 0.6567434411985937 | 0.3675081056205149 |
| 0.6921340437534000 | 0.8368993563754706 | 0.7510477558116515 |
| 0.6428234559795019 | 0.9432019414950034 | 0.8191939185956347 |
| 0.6252718805485961 | 0.8903912610150660 | 0.6117350648651403 |
| 0.7174049022493989 | 0.9565044088795576 | 0.6678381784431923 |
| 0.7810537599422960 | 0.9419541248862945 | 0.9505753527802006 |
| 0.7395397637217390 | 0.8629375974251138 | 0.0837263035251180 |
| 0.7064824403292884 | 0.9214272635026587 | 0.1128180856402618 |
| 0.5021636811105211 | 0.6978807142395533 | 0.3011608476901119 |
| 0.5981877883187225 | 0.8087292787321070 | 0.9193369776759562 |

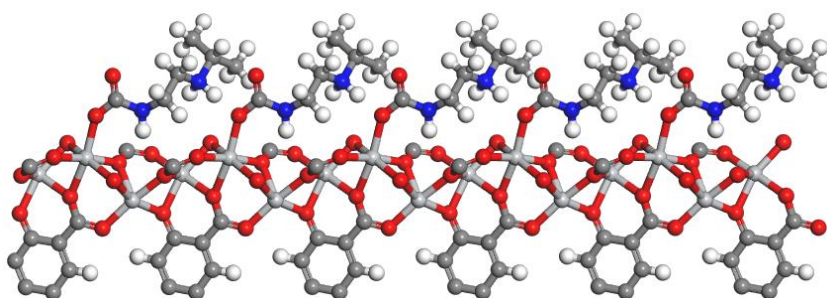

Ti-(F) Product

1.00000000000000

20.8512534795163340 -0.3080885035130459 0.1397536346727732

-11.5134142140380114 19.0947191395553446 -0.0370565159025508

-0.0463367895023305 -0.0163675600150085 7.0592293945990061

Ti O C H N

## Direct

|                    |                    |                    |
|--------------------|--------------------|--------------------|
| 0.3472518708267387 | 0.7503544674102116 | 0.8222627266252758 |
| 0.2693496265832280 | 0.6544640526904004 | 0.1619108524222312 |
| 0.3852196345061429 | 0.6860098276312883 | 0.4839196506954124 |
| 0.6950869389806655 | 0.3677835871083062 | 0.2046913654037112 |
| 0.5878046270487474 | 0.2903333634615919 | 0.8703463232587083 |
| 0.6157019775922521 | 0.3896111965908347 | 0.5378034916857501 |
| 0.4333501873365364 | 0.7885341513611124 | 0.6192870246365487 |
| 0.3761959395248766 | 0.7433077613956982 | 0.2601923294948918 |
| 0.4068778447831676 | 0.8246419637256608 | 0.0353066147728569 |
| 0.238666680567444  | 0.7015479394868294 | 0.9517638806044744 |
| 0.2816157331396880 | 0.6814754260282783 | 0.5979365057687360 |
| 0.1932003656393846 | 0.6381752415723980 | 0.3719860960186949 |
| 0.3165494067578436 | 0.5999512876552586 | 0.2844754157938709 |
| 0.3354326323859596 | 0.6557397395427174 | 0.9343697830231150 |
| 0.3808383555393888 | 0.6199030293867835 | 0.7042318431035213 |
| 0.4993630342328856 | 0.7158591754562096 | 0.4137001544533376 |
| 0.6066869187509241 | 0.7296415260827445 | 0.2921575257326552 |
| 0.7264610491269323 | 0.4468563288400276 | 0.4111942047778001 |
| 0.6821948666158306 | 0.3897740557495624 | 0.7646650489001061 |
| 0.7707835162730703 | 0.4233862320591015 | 0.9878525755670609 |
| 0.6427608906760227 | 0.2645848617622875 | 0.0770376419825425 |
| 0.6256482445371532 | 0.3036436641069002 | 0.4307787354696302 |
| 0.5712555166855040 | 0.2202123244075764 | 0.6538332750043523 |
| 0.5298220872234083 | 0.3368182544162792 | 0.7431173521227166 |
| 0.5903583745852927 | 0.3536589721768806 | 0.0975573835433678 |
| 0.5594310734331813 | 0.4053890717466473 | 0.3194570955295717 |
| 0.4657259839313141 | 0.8536047835774880 | 0.5404485976511779 |
| 0.4602424777902243 | 0.8652111856988256 | 0.3428014851786756 |
| 0.4965449469103973 | 0.9354760247141343 | 0.2767375789660562 |
| 0.5372561713324515 | 0.9940608839184364 | 0.3939451747786435 |
| 0.5418545613108137 | 0.9814610390222498 | 0.5881799704087882 |
| 0.5067190130838739 | 0.9130509547292149 | 0.6588361127979780 |
| 0.4138451613890837 | 0.8094381607443495 | 0.2072060178310409 |
| 0.1698994397487041 | 0.6735848650052674 | 0.8715210596842340 |
| 0.1558066923480297 | 0.6533359704775066 | 0.6764881373306579 |
| 0.0813206815387204 | 0.6225139156117336 | 0.6074539242915762 |
| 0.0213578002744583 | 0.6112089630276216 | 0.7208550166999572 |
| 0.0370509454317514 | 0.6334131527597080 | 0.9118598314442607 |
| 0.1094510917706017 | 0.6638817022520058 | 0.9848743749112003 |
| 0.2123654532765329 | 0.6579650716823053 | 0.5445545021418638 |
| 0.3339904983415423 | 0.5562518614644603 | 0.2003147207061104 |
| 0.3515579880215327 | 0.5594976923185087 | 0.0023213938573790 |
| 0.3745638929578092 | 0.5147099834311817 | 0.9312421517091636 |
| 0.3801332848457832 | 0.4666516243750820 | 0.0448590346092885 |



|                    |                    |                    |
|--------------------|--------------------|--------------------|
| 0.3593369682592140 | 0.4620072489454188 | 0.2373807969092709 |
| 0.3368155911982740 | 0.5053994004519780 | 0.3125115059352979 |
| 0.3549693929538620 | 0.6123690429668329 | 0.8725365183185971 |
| 0.5423226609974634 | 0.7195173321400077 | 0.2711716724954485 |
| 0.5420992951517718 | 0.6938968420815286 | 0.9309972193203038 |
| 0.6128075908128920 | 0.7540687109175011 | 0.8365034693752307 |
| 0.7948560740099921 | 0.4875551442809751 | 0.4931052750162479 |
| 0.8092839102129190 | 0.4810842707437288 | 0.6879372475156273 |
| 0.8835727649784886 | 0.5238122692135931 | 0.7575856391486440 |
| 0.9435049754542391 | 0.5725122821809236 | 0.6450355539644619 |
| 0.9276075354040998 | 0.5795861086415428 | 0.4546488445958872 |
| 0.8553286176156334 | 0.5382865631492066 | 0.3809928763272410 |
| 0.7522640076416991 | 0.4296632523589992 | 0.8185685316674878 |
| 0.6208201439947771 | 0.2022837558900292 | 0.1609506930631639 |
| 0.5985306214861481 | 0.1876579180776048 | 0.3557921548103451 |
| 0.5728625307307240 | 0.1195045991608907 | 0.4270554148860555 |
| 0.5696948923951339 | 0.0661303784428711 | 0.3171076802655932 |
| 0.5945674441846052 | 0.0825437894501704 | 0.1272263988905067 |
| 0.6191436132777781 | 0.1486095557618441 | 0.0513905161401382 |
| 0.5980648715334240 | 0.2386851852241278 | 0.4852059704997274 |
| 0.4916134815167723 | 0.3638841892374955 | 0.8231915003141523 |
| 0.5002648556383562 | 0.3852942776123882 | 0.0173601679997617 |
| 0.4609869923708345 | 0.4165729974453427 | 0.0842879146489608 |
| 0.4134281318277218 | 0.4271530700831718 | 0.9700235513069231 |
| 0.4036431283767286 | 0.4035608086520028 | 0.7804704333526047 |
| 0.4415973617696238 | 0.3727376762403338 | 0.7093786304556886 |
| 0.5516360264977322 | 0.3812224752268847 | 0.1501001489446665 |
| 0.6675109524340712 | 0.8546937578882918 | 0.6007819964986680 |
| 0.6462997008549323 | 0.8889979611733736 | 0.4465576394410249 |
| 0.7215835997766291 | 0.9092247800509128 | 0.7444533609695370 |
| 0.4884180262310096 | 0.9426156177097695 | 0.1278942187927328 |
| 0.5737620547501336 | 0.0259655622281159 | 0.6844497742231894 |
| 0.5097052151952397 | 0.9037311608129315 | 0.8097048909890745 |
| 0.0713083185040020 | 0.6044434741543370 | 0.4609020154486672 |
| 0.9915311051746443 | 0.6268106996310223 | 0.0033467911497027 |
| 0.1214164914903293 | 0.6808094119405084 | 0.1325775672632901 |
| 0.3919656892466961 | 0.5215992038057280 | 0.7830986005268485 |
| 0.3612988941389901 | 0.4235783157513566 | 0.3290419590470250 |
| 0.3218314362467467 | 0.5023095441884351 | 0.4619592602888503 |
| 0.5567284979695231 | 0.6557821270175026 | 0.9805632173137226 |
| 0.6406878951826585 | 0.7323461951726458 | 0.7545053241685125 |
| 0.8934828956301075 | 0.5152462539634257 | 0.9039127791283335 |
| 0.9730345884822214 | 0.6184959216908439 | 0.3638182933454388 |
| 0.8434728853242817 | 0.5438127137363438 | 0.2335243186367251 |
| 0.5526507870502542 | 0.1090170497949146 | 0.5729264569055204 |
| 0.5948151553804735 | 0.0425679170192197 | 0.0383865822829463 |

|                    |                    |                    |
|--------------------|--------------------|--------------------|
| 0.6378611752899701 | 0.1608301184620373 | 0.9042790252631434 |
| 0.4719827328872483 | 0.4356771136024804 | 0.2299243339658332 |
| 0.3653781135651144 | 0.4094829229053758 | 0.6879489104388696 |
| 0.4340547555068355 | 0.3550118453757065 | 0.5623507476668053 |
| 0.4969599988068438 | 0.6668300055839964 | 0.8252290302874528 |
| 0.5591718204045222 | 0.7606502044782530 | 0.5881947419608338 |
| 0.5683464776034413 | 0.8159322046213617 | 0.7629079236330725 |
| 0.6518175206329246 | 0.7899811582022949 | 0.9448775282696715 |
| 0.4584800244731468 | 0.7007406815189796 | 0.0846998432087460 |
| 0.6922280421059028 | 0.8269095058829592 | 0.5338766247872755 |
| 0.6252282194325218 | 0.9207818033590556 | 0.5067942677563053 |
| 0.6035387430373333 | 0.8499771242765206 | 0.3497081696758357 |
| 0.6971145013408560 | 0.9243741589808181 | 0.3632080330573402 |
| 0.7700402218637592 | 0.9523083729954251 | 0.6684073871515182 |
| 0.7437348953420440 | 0.8878016554842389 | 0.8472626604136480 |
| 0.6941361964360553 | 0.9325957962714924 | 0.8220131311543213 |
| 0.5134294641640054 | 0.7149205797321514 | 0.0900290832103536 |
| 0.5969860676084480 | 0.7956524622981789 | 0.6971431881221406 |

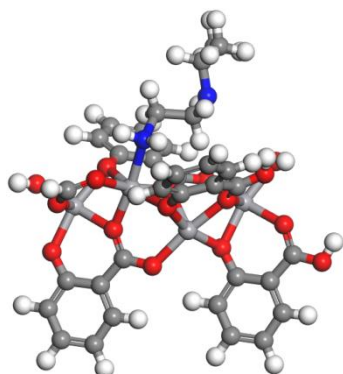

V-(A) i-2-MOF

-1 1

|   |    |             |             |             |
|---|----|-------------|-------------|-------------|
| H | 0  | -1.65816000 | 7.69704100  | -1.17790800 |
| V | -1 | -2.70072200 | 0.96198300  | -1.48177000 |
| O | -1 | -4.48819100 | -0.17560600 | -1.78148800 |
| O | -1 | -1.23032700 | 2.43034900  | -1.19971900 |
| O | -1 | -4.05224500 | 2.42742700  | -0.87710200 |
| O | -1 | -5.03562200 | 4.42109800  | -0.77305100 |
| O | -1 | -2.37981700 | 0.70747700  | 0.61790900  |
| O | -1 | -4.36362200 | 0.29162200  | 1.54425400  |
| H | 0  | -4.97793400 | -0.00931800 | -0.96858700 |
| C | -1 | -1.40753800 | 3.76101700  | -1.21051900 |
| C | -1 | -2.67891400 | 4.41073400  | -1.09551300 |
| C | -1 | -2.72438800 | 5.81756900  | -1.08902000 |
| C | -1 | -1.58808900 | 6.61543600  | -1.19584000 |
| C | -1 | -0.34617000 | 5.95984800  | -1.33481500 |
| C | -1 | -0.25965600 | 4.57835500  | -1.34494700 |
| C | -1 | -3.98001500 | 3.72169600  | -0.90414300 |
| C | -1 | -2.43960200 | 0.06245600  | 2.93755200  |

|   |    |             |             |             |
|---|----|-------------|-------------|-------------|
| C | -1 | -3.28956800 | -0.26211200 | 4.01149900  |
| C | -1 | -3.10680000 | 0.38098400  | 1.64923700  |
| H | 0  | -3.49465300 | -0.94496000 | 6.05394300  |
| C | 0  | -3.13965400 | -5.06441500 | -0.78902900 |
| C | 0  | -3.62956600 | -5.50764100 | -2.16124400 |
| H | -1 | -3.70252200 | 6.27675900  | -0.94637000 |
| H | -1 | 0.56391900  | 6.55249400  | -1.45137000 |
| H | -1 | -4.36250800 | -0.21651200 | 3.82115100  |
| H | 0  | -2.27136300 | -3.45499600 | -1.66989100 |
| C | 0  | -4.18437600 | -5.35515000 | 0.28141100  |
| H | 0  | -2.23647900 | -5.65506000 | -0.55022800 |
| H | 0  | -2.87552800 | -5.31231500 | -2.93217900 |
| H | 0  | -4.54208300 | -4.96567300 | -2.43225900 |
| H | 0  | -3.84689300 | -6.57961600 | -2.16903800 |
| N | 0  | -2.85053900 | -3.62949100 | -0.85236000 |
| H | 0  | 4.88019100  | 5.50049100  | 0.03859000  |
| V | -1 | 3.83630800  | -1.23534800 | -0.26140200 |
| V | -1 | -0.39508000 | 1.34167800  | 0.45650600  |
| V | 0  | 1.19507100  | -1.09704300 | 0.89445800  |
| O | 0  | 2.05802200  | -2.28901800 | -0.58910100 |
| O | 0  | -0.07932600 | -0.49785700 | -0.55708500 |
| O | -1 | -1.40184300 | -0.46586600 | -2.34074000 |
| O | -1 | 5.30661900  | 0.23312700  | 0.02044700  |
| O | 0  | 2.54500200  | 0.24757600  | 0.27157400  |
| O | -1 | 1.50134400  | 2.22398100  | 0.44731100  |
| O | 0  | -0.15606300 | 0.20573500  | 2.12848200  |
| O | -1 | 4.15706900  | -1.48891600 | 1.83824800  |
| O | 0  | 2.16863000  | -1.82853400 | 2.79299500  |
| C | -1 | 1.56038400  | -2.64881900 | -1.78024300 |
| C | -1 | 0.39065700  | -2.04287000 | -2.35200700 |
| C | -1 | -0.00205400 | -2.40734200 | -3.65244000 |
| C | -1 | 0.68334700  | -3.34183200 | -4.42456000 |
| C | -1 | 1.81770100  | -3.94730700 | -3.84388800 |
| C | -1 | 2.23933200  | -3.61218500 | -2.56752700 |
| C | -1 | -0.40963900 | -0.96671700 | -1.71907200 |
| C | -1 | 5.12952600  | 1.56388300  | 0.00984300  |
| C | -1 | 3.85805000  | 2.21361400  | 0.12474900  |
| C | -1 | 3.81267600  | 3.62043500  | 0.13134200  |
| C | -1 | 4.94897500  | 4.41830200  | 0.02452200  |
| C | -1 | 6.19079400  | 3.76272800  | -0.11455300 |
| C | -1 | 6.27730800  | 2.38123500  | -0.12468500 |
| C | -1 | 2.55696500  | 1.52467100  | 0.31601600  |
| C | -1 | -1.02010400 | -0.07607600 | 3.10470300  |
| H | 0  | 3.93645900  | -2.06910200 | 3.80909500  |
| C | -1 | -2.81527500 | -0.69522200 | 5.24721300  |
| C | -1 | -1.41410800 | -0.78474000 | 5.40863100  |

|   |    |             |             |             |
|---|----|-------------|-------------|-------------|
| C | -1 | -0.54727700 | -0.48693000 | 4.37400800  |
| C | -1 | 3.43037200  | -1.81729400 | 2.86933600  |
| C | 0  | -0.83608300 | -3.63799700 | 0.67166200  |
| C | 0  | -2.19368000 | -3.03754800 | 0.30076300  |
| H | 0  | -0.74237300 | -2.41884100 | 2.31188800  |
| H | -1 | -0.85986900 | -1.87962300 | -4.06927100 |
| H | -1 | 3.12770300  | -4.07808400 | -2.13522400 |
| H | -1 | 2.83454100  | 4.07962200  | 0.27389200  |
| H | -1 | 7.10098300  | 4.35536000  | -0.23100800 |
| H | -1 | 0.70299300  | 4.07549600  | -1.45412600 |
| H | -1 | -1.00584000 | -1.08774400 | 6.37528600  |
| H | -1 | 0.53476900  | -0.56183300 | 4.50069200  |
| H | 0  | -0.23432600 | -3.77425700 | -0.23207800 |
| H | 0  | -0.96970900 | -4.62634300 | 1.12713900  |
| H | 0  | -2.06297500 | -1.97017700 | 0.09383200  |
| H | 0  | -2.86261500 | -3.09694700 | 1.16906100  |
| H | 0  | 0.60462500  | -3.27846100 | 2.09046700  |
| N | 0  | -0.10185800 | -2.74469500 | 1.58766700  |
| H | 0  | 0.35946400  | -3.58778700 | -5.42949200 |
| H | -1 | 2.36988000  | -4.70374400 | -4.40587700 |
| O | -1 | 5.13510500  | -2.66308200 | -1.12037400 |
| H | 0  | 5.73880500  | -2.93852000 | -0.42219500 |
| H | -1 | 7.24005700  | 1.87836300  | -0.23376400 |
| H | 0  | -4.75920500 | -0.29184200 | 2.20322700  |
| H | 0  | -5.79563000 | 3.82684400  | -0.66847800 |
| H | 0  | -4.43667700 | -6.41984300 | 0.28458400  |
| H | 0  | -5.09675900 | -4.78179200 | 0.08393300  |
| H | 0  | -3.83085400 | -5.09970400 | 1.28506400  |

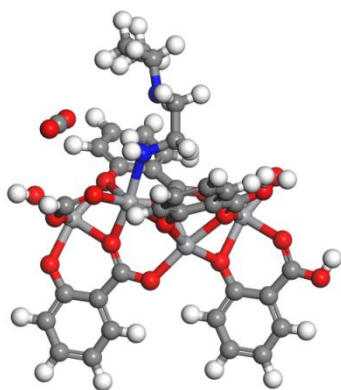

V-(B) Complex

|    |    |             |             |             |
|----|----|-------------|-------------|-------------|
| -1 | 1  |             |             |             |
| H  | 0  | -8.17665500 | 1.87920500  | -0.45626200 |
| V  | -1 | -2.65456200 | -1.96703800 | -1.49857200 |
| O  | -1 | -2.52276300 | -4.02720600 | -1.97316200 |
| O  | -1 | -3.27947400 | -0.03040300 | -0.97912200 |
| O  | -1 | -4.48076700 | -2.58090900 | -0.68543500 |
| O  | -1 | -6.68304900 | -2.60345800 | -0.35261200 |

|   |    |             |             |             |
|---|----|-------------|-------------|-------------|
| O | -1 | -2.01734800 | -1.94587900 | 0.54290100  |
| O | -1 | -2.41485600 | -3.97850600 | 1.36836200  |
| H | 0  | -2.90585700 | -4.44645100 | -1.19499400 |
| C | -1 | -4.54560600 | 0.39258300  | -0.85103800 |
| C | -1 | -5.67377400 | -0.47348100 | -0.67572500 |
| C | -1 | -6.95256900 | 0.09782300  | -0.53671100 |
| C | -1 | -7.17870800 | 1.47161800  | -0.57095500 |
| C | -1 | -6.05862500 | 2.30901700  | -0.76107500 |
| C | -1 | -5.60843200 | -1.95318900 | -0.56230700 |
| C | -1 | -1.24146400 | -3.40976300 | 3.78427200  |
| C | -1 | -1.93996400 | -2.81324800 | 1.50818600  |
| H | 0  | -0.53134000 | -4.03385900 | 5.73095100  |
| C | 0  | 4.97322600  | -3.74362600 | -2.76255700 |
| H | -1 | -7.78031400 | -0.58818500 | -0.35651600 |
| H | -1 | -1.77499200 | -4.33860600 | 3.57885400  |
| H | 0  | 2.74771900  | -3.29254000 | -1.76739400 |
| H | 0  | 4.24750800  | -5.23599400 | -1.40614000 |
| H | 0  | 4.16692200  | -3.87527300 | -3.49280400 |
| H | 0  | 5.82906700  | -4.33736500 | -3.09568400 |
| H | 0  | -3.18384300 | 6.70074200  | 0.53752600  |
| H | -1 | -6.20131600 | 3.39017700  | -0.82118700 |
| V | -1 | 2.33796700  | 2.85381300  | -0.50184200 |
| V | -1 | -1.74409200 | 0.13096900  | 0.50596000  |
| V | 0  | 1.18923100  | 0.46067000  | 0.63513000  |
| O | 0  | 2.40221900  | 0.86491100  | -1.00704400 |
| O | 0  | -0.09134500 | -0.31878500 | -0.74677100 |
| O | -1 | -0.91621900 | -1.35592700 | -2.52500500 |
| O | -1 | 1.71338700  | 4.78974700  | 0.01787300  |
| O | 0  | 0.51780200  | 2.31160000  | 0.26385900  |
| O | -1 | -1.69011100 | 2.21649800  | 0.64407200  |
| O | 0  | -0.43872900 | -0.27134100 | 2.02449000  |
| O | -1 | 2.97549900  | 2.87407500  | 1.53969300  |
| O | 0  | 2.50581400  | 0.86705900  | 2.40176700  |
| O | 0  | 5.44414800  | -0.32715600 | 0.94036300  |
| O | 0  | 5.74475900  | -0.04256900 | 3.23378800  |
| C | -1 | 2.40265300  | 0.27763100  | -2.20971200 |
| C | -1 | 1.29818500  | -0.48960800 | -2.70842500 |
| C | -1 | 1.35684500  | -1.00732400 | -4.01375900 |
| C | -1 | 2.45037000  | -0.81934300 | -4.85490600 |
| C | -1 | 3.52557400  | -0.05255100 | -4.35460200 |
| C | -1 | 3.49878800  | 0.48239900  | -3.08022900 |
| C | -1 | 0.04977400  | -0.74693800 | -1.96175400 |
| C | -1 | 0.44734100  | 5.21253700  | 0.14574600  |
| C | -1 | -0.68082700 | 4.34637300  | 0.32105700  |
| C | -1 | -1.95962200 | 4.91777700  | 0.46007300  |
| C | -1 | -2.18576200 | 6.29157300  | 0.42582900  |

|   |    |             |             |             |
|---|----|-------------|-------------|-------------|
| C | -1 | -1.06577800 | 7.12897100  | 0.23571700  |
| C | -1 | -4.78469600 | 1.78652200  | -0.89707100 |
| C | -1 | -0.61580500 | 2.86716500  | 0.43430900  |
| C | -1 | -0.49114700 | -1.22840600 | 2.95050900  |
| C | -1 | -1.25437000 | -2.43412200 | 2.77092600  |
| C | -1 | -0.52898500 | -3.26002300 | 4.97211800  |
| C | -1 | 0.18783400  | -2.05506800 | 5.14857200  |
| C | -1 | 0.20399500  | -1.07400300 | 4.17366100  |
| C | -1 | 3.05348300  | 2.00501600  | 2.50470400  |
| C | 0  | 5.59107400  | -0.18417000 | 2.08822000  |
| C | 0  | 1.58738400  | -2.77385100 | 0.55022500  |
| C | 0  | 2.63456800  | -3.81515800 | 0.17765300  |
| C | 0  | 4.53149900  | -4.16753700 | -1.36802400 |
| H | -1 | 0.47868300  | -1.54716200 | -4.36886500 |
| H | -1 | 4.33850400  | 1.06651800  | -2.69904700 |
| H | -1 | -2.78737600 | 4.23177100  | 0.64016800  |
| H | -1 | -3.92198300 | 2.43748500  | -1.05004000 |
| H | -1 | 0.73345600  | -1.89038500 | 6.08008800  |
| H | -1 | 0.76371800  | -0.14674300 | 4.31268600  |
| H | 0  | 1.05249400  | -3.07133600 | 1.45466800  |
| H | 0  | 2.14379400  | -4.78995400 | 0.01402200  |
| H | 0  | 0.84429300  | -2.68860000 | -0.24943700 |
| H | 0  | 2.98574900  | -1.40244200 | 0.10686700  |
| H | 0  | 3.32578900  | -3.94300000 | 1.01851000  |
| H | 0  | 2.61717300  | -1.41848600 | 1.68941600  |
| C | 0  | 5.67589300  | -4.01738300 | -0.37170000 |
| H | 0  | 5.26243800  | -2.68690200 | -2.76380000 |
| N | 0  | 2.19884300  | -1.45040800 | 0.76054800  |
| N | 0  | 3.38571300  | -3.34384400 | -0.97638900 |
| H | 0  | 2.46590800  | -1.22916500 | -5.85852900 |
| H | -1 | 4.40861100  | 0.10274400  | -4.97837000 |
| H | -1 | -1.20846900 | 8.21013000  | 0.17560500  |
| O | -1 | 4.07681700  | 3.46423100  | -1.52832600 |
| H | 0  | 4.68595500  | 3.77868400  | -0.85184000 |
| C | -1 | 0.20825000  | 6.60647600  | 0.09971300  |
| H | 0  | 3.60137500  | 2.27703100  | 3.41500000  |
| H | -1 | 1.07096300  | 7.25744000  | -0.05325600 |
| H | 0  | -2.02100900 | -4.62176300 | 1.96991200  |
| H | 0  | -6.47540700 | -3.55078700 | -0.32156900 |
| H | 0  | 5.97979600  | -2.96753300 | -0.30097600 |
| H | 0  | 6.53816700  | -4.60823200 | -0.69552900 |
| H | 0  | 5.40217900  | -4.36093700 | 0.63016800  |

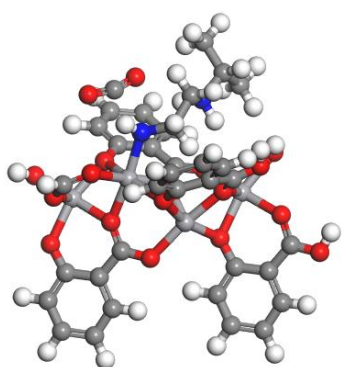

V-(C) TS<sub>1</sub>

-1 1

|   |    |             |             |             |
|---|----|-------------|-------------|-------------|
| H | 0  | -4.52771700 | 6.59845500  | -1.42841200 |
| V | -1 | -2.96116800 | -0.02823100 | -1.34014700 |
| O | -1 | -4.23102300 | -1.71147600 | -1.54431400 |
| O | -1 | -2.14195100 | 1.89453600  | -1.13517200 |
| O | -1 | -4.73897600 | 0.85374000  | -0.68051700 |
| O | -1 | -6.39948900 | 2.33656100  | -0.61011000 |
| O | -1 | -2.48833700 | -0.08627200 | 0.74481800  |
| O | -1 | -4.14519700 | -1.18323700 | 1.75621500  |
| H | 0  | -4.40730800 | -2.01564800 | -0.64751100 |
| C | -1 | -2.80582600 | 3.05751300  | -1.20939400 |
| C | -1 | -4.22558000 | 3.18877400  | -1.06569400 |
| C | -1 | -4.80018400 | 4.47096600  | -1.14861200 |
| C | -1 | -4.05384900 | 5.62480700  | -1.37445600 |
| C | -1 | -2.65899600 | 5.47530100  | -1.53033100 |
| C | -1 | -5.16312700 | 2.07567700  | -0.76806900 |
| C | -1 | -2.91062400 | -1.12645200 | 4.20758800  |
| C | -1 | -3.01599800 | -0.61294900 | 1.80984200  |
| H | 0  | -2.81216900 | -1.72366900 | 6.28582700  |
| C | 0  | -2.58492900 | -4.42384400 | -2.55147200 |
| H | -1 | -5.87603600 | 4.53879000  | -0.98628500 |
| H | -1 | -3.92553000 | -1.49526800 | 4.05400800  |
| H | 0  | -1.84510600 | -2.94536500 | -0.69353300 |
| H | 0  | -2.91897100 | -5.12388300 | -0.55012700 |
| H | 0  | -3.20340900 | -3.52695400 | -2.40812500 |
| H | 0  | -3.19281400 | -5.20525300 | -3.01517600 |
| H | 0  | 2.39963600  | 7.04339300  | -0.43918900 |
| H | -1 | -2.04506700 | 6.35461500  | -1.73656700 |
| V | -1 | 3.96525200  | 0.41673900  | -0.34793600 |
| V | -1 | -0.90128800 | 1.25750400  | 0.49067200  |
| V | 0  | 1.46500300  | -0.47746500 | 0.91969800  |
| O | 0  | 2.69459300  | -1.13944800 | -0.62240500 |
| O | 0  | 0.04161300  | -0.35445600 | -0.50563700 |
| O | -1 | -1.24926400 | -0.89071800 | -2.22007400 |
| O | -1 | 4.78435300  | 2.33902300  | -0.14273100 |
| O | 0  | 2.22991500  | 1.33559600  | 0.26879500  |

|   |    |             |             |             |
|---|----|-------------|-------------|-------------|
| O | -1 | 0.52677100  | 2.78071800  | 0.38205000  |
| O | 0  | -0.20998400 | 0.35230700  | 2.18215400  |
| O | -1 | 4.43788300  | 0.35780100  | 1.73708400  |
| O | 0  | 2.75078700  | -0.67111200 | 2.78207200  |
| O | 0  | 3.23939800  | -3.88793100 | 0.84143300  |
| O | 0  | 1.47910300  | -4.64475000 | -0.47002400 |
| C | -1 | 2.31176400  | -1.81015400 | -1.71367100 |
| C | -1 | 0.98105600  | -1.73509300 | -2.24349800 |
| C | -1 | 0.69062100  | -2.37467800 | -3.46075500 |
| C | -1 | 1.63838100  | -3.09466500 | -4.18328200 |
| C | -1 | 2.94704300  | -3.15055700 | -3.65545300 |
| C | -1 | 3.27296500  | -2.52434600 | -2.46682000 |
| C | -1 | -0.12772200 | -0.98050800 | -1.62404800 |
| C | -1 | 4.12039100  | 3.50157900  | -0.21722800 |
| C | -1 | 2.70068300  | 3.63293600  | -0.07343500 |
| C | -1 | 2.12607900  | 4.91512800  | -0.15635300 |
| C | -1 | 2.87245600  | 6.06906000  | -0.38220300 |
| C | -1 | 4.26713300  | 5.91941600  | -0.53806600 |
| C | -1 | -2.05555800 | 4.23268400  | -1.45094700 |
| C | -1 | 1.76311800  | 2.52027400  | 0.22396700  |
| C | -1 | -0.89161300 | -0.15269000 | 3.21195000  |
| C | -1 | -2.26239400 | -0.57046600 | 3.08985600  |
| C | -1 | -2.28914800 | -1.28305600 | 5.44471700  |
| C | -1 | -0.95332300 | -0.83596000 | 5.55827000  |
| C | -1 | -0.28006900 | -0.28853000 | 4.48114500  |
| C | -1 | 3.90949900  | -0.17041900 | 2.80211100  |
| C | 0  | 2.25067600  | -4.11552600 | 0.24990200  |
| C | 0  | -0.46386700 | -2.72849000 | 1.55277000  |
| C | 0  | -1.07596200 | -3.98335300 | 0.92955100  |
| C | 0  | -2.07060100 | -4.93084800 | -1.21528400 |
| H | -1 | -0.32107400 | -2.25637200 | -3.84958800 |
| H | -1 | 4.28531500  | -2.58048600 | -2.06231200 |
| H | -1 | 1.05035900  | 4.98300000  | 0.00596800  |
| H | -1 | -0.97732300 | 4.12074300  | -1.57813100 |
| H | -1 | -0.44424600 | -0.91540800 | 6.52110400  |
| H | -1 | 0.75379500  | 0.05072100  | 4.57265900  |
| H | 0  | -0.64818200 | -2.83413900 | 2.63094500  |
| H | 0  | -2.05729400 | -4.17265900 | 1.37371800  |
| H | 0  | -1.08432100 | -1.88944200 | 1.22645000  |
| H | 0  | -0.39469300 | -3.68435800 | -0.98516700 |
| H | 0  | -0.44877000 | -4.86459100 | 1.06025100  |
| H | 0  | 1.49667600  | -2.72953700 | 2.03386700  |
| C | 0  | -1.21168800 | -6.17606700 | -1.33412700 |
| H | 0  | -1.75623200 | -4.19670600 | -3.23049800 |
| N | 0  | 0.92050400  | -2.40607800 | 1.26084300  |
| N | 0  | -1.31182000 | -3.81276400 | -0.53719600 |



|   |    |             |             |             |
|---|----|-------------|-------------|-------------|
| H | 0  | 1.38507100  | -3.57438100 | -5.12204000 |
| H | -1 | 3.71423100  | -3.72013100 | -4.18450900 |
| H | -1 | 4.88119500  | 6.79877700  | -0.74430700 |
| O | -1 | 5.67721400  | -0.44633200 | -1.22793300 |
| H | 0  | 6.31436600  | -0.55749000 | -0.51445600 |
| C | -1 | 4.87070400  | 4.67684600  | -0.45868800 |
| H | 0  | 4.49641700  | -0.16372800 | 3.73003900  |
| H | -1 | 5.94898200  | 4.56499600  | -0.58587700 |
| H | 0  | -4.25559600 | -1.85602700 | 2.43991300  |
| H | 0  | -6.87402900 | 1.50732500  | -0.44282000 |
| H | 0  | -0.34366600 | -5.99597700 | -1.97492200 |
| H | 0  | -1.81286400 | -6.96579600 | -1.79123100 |
| H | 0  | -0.86215800 | -6.54250500 | -0.36642300 |

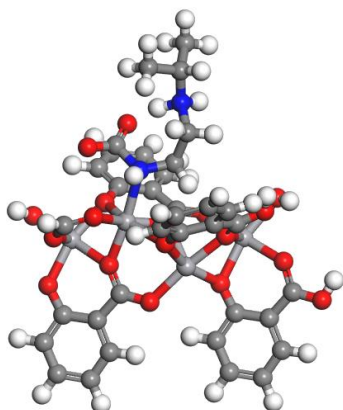

V-(D) Intermediate from Gaussian

-1 1

|   |    |             |             |             |
|---|----|-------------|-------------|-------------|
| H | 0  | -8.18602900 | -1.60453900 | -0.28143800 |
| V | -1 | -1.59650500 | -2.61388000 | -1.67096100 |
| O | -1 | -0.61433000 | -4.37670800 | -2.31519900 |
| O | -1 | -2.96886500 | -1.17771300 | -0.98932900 |
| O | -1 | -2.94870400 | -4.01074000 | -0.90055900 |
| O | -1 | -4.91329600 | -5.00263500 | -0.55783900 |
| O | -1 | -0.94680800 | -2.46802700 | 0.36148000  |
| O | -1 | -0.40105000 | -4.52775500 | 1.01811500  |
| H | 0  | -0.79146900 | -4.99405400 | -1.59717400 |
| C | -1 | -4.28781800 | -1.35120700 | -0.81912600 |
| C | -1 | -4.92790200 | -2.62862900 | -0.70940600 |
| C | -1 | -6.32133200 | -2.67482300 | -0.51605500 |
| C | -1 | -7.11533000 | -1.53356100 | -0.43509800 |
| C | -1 | -6.47082600 | -0.28430200 | -0.56180900 |
| C | -1 | -4.23047700 | -3.94006700 | -0.71932600 |
| C | -1 | 0.51344200  | -3.68548000 | 3.46578000  |
| C | -1 | -0.46581800 | -3.28486000 | 1.25113600  |
| H | 0  | 1.50168800  | -4.08218100 | 5.34960400  |
| C | 0  | 6.84209300  | -3.41580800 | -1.31599800 |
| H | -1 | -6.76731200 | -3.66131800 | -0.38843700 |
| H | -1 | 0.42134900  | -4.73598700 | 3.18741500  |

|   |    |             |             |             |
|---|----|-------------|-------------|-------------|
| H | 0  | 4.37918200  | -3.05433400 | -1.29022800 |
| H | 0  | 5.82598300  | -4.06374000 | 0.46652200  |
| H | 0  | 6.32781600  | -4.12935700 | -1.96727400 |
| H | 0  | 7.80651100  | -3.84880200 | -1.04065800 |
| H | 0  | -5.70348400 | 4.81098000  | 1.08253200  |
| H | -1 | -7.06525600 | 0.63147200  | -0.53134200 |
| V | -1 | 0.88591100  | 3.80009300  | -0.30794800 |
| V | -1 | -1.59142000 | -0.47912200 | 0.49502200  |
| V | 0  | 0.99561600  | 1.14727300  | 0.61317900  |
| O | 0  | 1.75160800  | 2.09789700  | -0.99360700 |
| O | 0  | 0.09037800  | -0.08835100 | -0.78984900 |
| O | -1 | -0.33111600 | -1.24195500 | -2.65358100 |
| O | -1 | -0.48598700 | 5.23583900  | 0.37378700  |
| O | 0  | -0.48109600 | 2.49570000  | 0.55844900  |
| O | -1 | -2.43024300 | 1.41074100  | 0.80493300  |
| O | 0  | -0.16000800 | -0.38905800 | 1.95866400  |
| O | -1 | 1.53626000  | 3.94534100  | 1.72435200  |
| O | 0  | 1.92284100  | 1.87741800  | 2.46323200  |
| O | 0  | 4.45108300  | 1.43908700  | 0.87374600  |
| O | 0  | 4.54975000  | -0.03879300 | -0.81443200 |
| C | -1 | 1.97788700  | 1.63306600  | -2.22373400 |
| C | -1 | 1.28908400  | 0.50365000  | -2.77778000 |
| C | -1 | 1.51041700  | 0.15722500  | -4.12167700 |
| C | -1 | 2.38249800  | 0.85775300  | -4.95089600 |
| C | -1 | 3.04510400  | 1.97422600  | -4.39525400 |
| C | -1 | 2.84384300  | 2.35208000  | -3.08072200 |
| C | -1 | 0.30296900  | -0.31904100 | -2.04759800 |
| C | -1 | -1.80475100 | 5.06216000  | 0.54374500  |
| C | -1 | -2.44492100 | 3.78481400  | 0.65338300  |
| C | -1 | -3.83826900 | 3.73868500  | 0.84682900  |
| C | -1 | -4.63233500 | 4.87987300  | 0.92778900  |
| C | -1 | -3.98777300 | 6.12907400  | 0.80096300  |
| C | -1 | -5.10261000 | -0.19652400 | -0.74813800 |
| C | -1 | -1.74786600 | 2.47357900  | 0.64343000  |
| C | -1 | 0.22215800  | -1.33965000 | 2.81121700  |
| C | -1 | 0.04244800  | -2.73997700 | 2.53678600  |
| C | -1 | 1.14108800  | -3.32997500 | 4.65773600  |
| C | -1 | 1.27925000  | -1.95000100 | 4.92917000  |
| C | -1 | 0.83355000  | -0.98986700 | 4.03876200  |
| C | -1 | 2.01831600  | 3.12723400  | 2.61354900  |
| C | 0  | 4.04638700  | 0.46982900  | 0.23637500  |
| C | 0  | 2.56737700  | -1.55098400 | 0.25859800  |
| C | 0  | 3.63531000  | -2.59574000 | 0.56718200  |
| C | 0  | 6.03861900  | -3.12589900 | -0.05884500 |
| H | -1 | 0.93448600  | -0.68064300 | -4.51507800 |
| H | -1 | 3.36736800  | 3.21154600  | -2.65758800 |

|   |    |             |             |             |
|---|----|-------------|-------------|-------------|
| H | -1 | -4.28424900 | 2.75219000  | 0.97444700  |
| H | -1 | -4.60903500 | 0.77149800  | -0.85188100 |
| H | -1 | 1.73928000  | -1.63433100 | 5.86792400  |
| H | -1 | 0.94735200  | 0.07528300  | 4.25064900  |
| H | 0  | 1.62606200  | -1.86893600 | 0.70242000  |
| H | 0  | 3.20547000  | -3.59990600 | 0.57872700  |
| H | 0  | 2.39864200  | -1.50330700 | -0.82019300 |
| H | 0  | 4.77456800  | -1.49758500 | -0.73067600 |
| H | 0  | 4.08788800  | -2.41179200 | 1.54420600  |
| H | 0  | 2.86578800  | -0.15235700 | 1.75416900  |
| C | 0  | 6.75341000  | -2.15680000 | 0.86940400  |
| H | 0  | 7.03100300  | -2.49752900 | -1.88116000 |
| N | 0  | 2.83013500  | -0.18990500 | 0.73516700  |
| N | 0  | 4.71253800  | -2.55856100 | -0.46252700 |
| H | 0  | 2.53207000  | 0.56751400  | -5.98482500 |
| H | -1 | 3.75013300  | 2.53887600  | -5.00919800 |
| H | -1 | -4.58220200 | 7.04484800  | 0.83143100  |
| O | -1 | 2.15178900  | 5.17169600  | -1.29076400 |
| H | 0  | 2.68380500  | 5.55854200  | -0.58767100 |
| C | -1 | -2.61962900 | 6.21691900  | 0.61465000  |
| H | 0  | 2.47997800  | 3.54416400  | 3.51699500  |
| H | -1 | -2.12597300 | 7.18500600  | 0.51100300  |
| H | 0  | 0.24855300  | -4.98172900 | 1.56835500  |
| H | 0  | -4.31965400 | -5.76878200 | -0.60762900 |
| H | 0  | 6.93395800  | -1.20241600 | 0.36553600  |
| H | 0  | 7.71727600  | -2.58313400 | 1.15694900  |
| H | 0  | 6.19370400  | -1.96396000 | 1.78847400  |

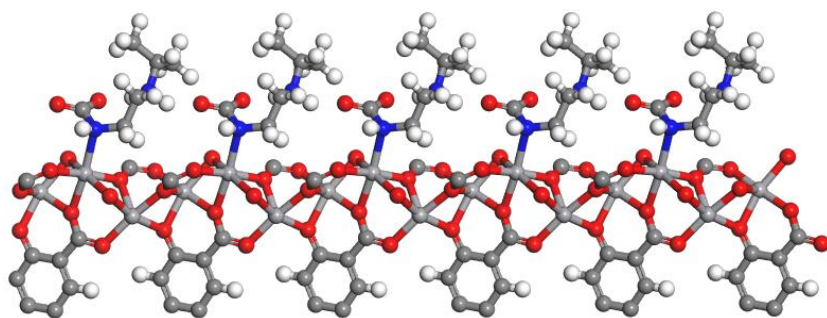

V-(D) Intermediate from VASP

1.0000000000000000

21.1573358692988300 -0.0011835700067458 -0.0137970897157162

-11.2497154311966305 19.1109362030669772 0.0018099502873410

-0.0099466194043966 -0.0070140805855092 7.0036547714138981

V O C H N

6 20 48 32 2

Direct

0.3301526053646112 0.7426597587138835 0.8475399135170665

0.2660102238820986 0.6441243996846544 0.1861666484406689

0.3790937469646602 0.6859129871402997 0.5123706405582240

|                    |                    |                    |
|--------------------|--------------------|--------------------|
| 0.6964365218367518 | 0.3561387345266176 | 0.2225457372840846 |
| 0.5904270913262707 | 0.2900385762139834 | 0.8886060451371044 |
| 0.6278744597161156 | 0.3905787644360190 | 0.5557013505764284 |
| 0.4176601378396695 | 0.7845356597410003 | 0.6496008146472356 |
| 0.3611693000169059 | 0.7375570930928158 | 0.2849531457962665 |
| 0.3841184696714230 | 0.8182123768106525 | 0.0633090398858432 |
| 0.2277752034713862 | 0.6910378165202011 | 0.9841694927550170 |
| 0.2748752225186758 | 0.6759475344924831 | 0.6179528953987993 |
| 0.1875905331617356 | 0.6213912963310008 | 0.3983619374607259 |
| 0.3188837319623194 | 0.5969591208467624 | 0.3187880375366849 |
| 0.3338174767865142 | 0.6542929918570289 | 0.9559585511344137 |
| 0.3869181231119210 | 0.6231643261992629 | 0.7329676243301593 |
| 0.5624725904624405 | 0.7696520278528243 | 0.6994896703651396 |
| 0.5711877967131266 | 0.8321411499503861 | 0.4326379319664959 |
| 0.7307877423664685 | 0.4409399700015388 | 0.4211261068727292 |
| 0.6857815384500515 | 0.3829309854247659 | 0.7873294151087892 |
| 0.7730807504020475 | 0.4117056477698340 | 0.0061952633723090 |
| 0.6450768936155453 | 0.2577830455183752 | 0.0869040271912469 |
| 0.6296015063121252 | 0.3004566209617863 | 0.4531387201497841 |
| 0.5712668782694019 | 0.2171616303624223 | 0.6710955508543598 |
| 0.5383577993623958 | 0.3383362869133732 | 0.7530610706189784 |
| 0.5994076717223945 | 0.3534877308190166 | 0.1200730197180286 |
| 0.5716705828512076 | 0.4095894773839077 | 0.3377229042085493 |
| 0.4473616827625340 | 0.8475623942197666 | 0.5673430283840143 |
| 0.4389417934420875 | 0.8587398012495554 | 0.3695525090053134 |
| 0.4743004391583727 | 0.9274326035887721 | 0.2981311483637888 |
| 0.5179891799137917 | 0.9858654299555411 | 0.4109258146340175 |
| 0.5251401783526818 | 0.9740729362061658 | 0.6059018606401377 |
| 0.4906739857411896 | 0.9073150162159560 | 0.6816275222915413 |
| 0.3927480212884372 | 0.8026914872996155 | 0.2326606515838801 |
| 0.1617595829537372 | 0.6592756681441539 | 0.8994021301241547 |
| 0.1492248868607888 | 0.6378195238585400 | 0.7032891161581485 |
| 0.0769816954214154 | 0.6041515226292433 | 0.6320253005101149 |
| 0.0167717842432147 | 0.5910501563974850 | 0.7430333205005432 |
| 0.0302415970654834 | 0.6133149360198226 | 0.9352312044483343 |
| 0.1004098913161794 | 0.6463487137623746 | 0.0108486049001771 |
| 0.2065090065512153 | 0.6452148943600394 | 0.5672250616457287 |
| 0.3414441105748768 | 0.5578776754955944 | 0.2304930804642767 |
| 0.3595710344700053 | 0.5630460094644492 | 0.0311918763937949 |
| 0.3869447163431532 | 0.5217547165626313 | 0.9575745275612982 |
| 0.3968208311581887 | 0.4750977913250536 | 0.0689575308263109 |
| 0.3769160844388434 | 0.4692529187707588 | 0.2634760534253284 |
| 0.3500510300661186 | 0.5091253781715124 | 0.3413537058847194 |
| 0.3599627437818450 | 0.6155402581743785 | 0.8984722919864488 |
| 0.5482788836722181 | 0.7768160385343290 | 0.5296265122831842 |
| 0.5035977684149122 | 0.7041479186382920 | 0.2235349093419519 |

|                    |                    |                    |
|--------------------|--------------------|--------------------|
| 0.5805072278812838 | 0.7449760616299719 | 0.1356730798855140 |
| 0.7968094613925016 | 0.4757641901589789 | 0.5064470148721537 |
| 0.8103174810937872 | 0.4678871331272910 | 0.7030465476469110 |
| 0.8824624266276939 | 0.5066678260666035 | 0.7742624624377309 |
| 0.9417758985132766 | 0.5532631306358139 | 0.6628806395862243 |
| 0.9273510566515315 | 0.5610078899923052 | 0.4702869631730145 |
| 0.8572635022602558 | 0.5235182187078121 | 0.3947100932799693 |
| 0.7543115699344392 | 0.4186797301519543 | 0.8388210542619965 |
| 0.6160345225552567 | 0.1950524789263914 | 0.1725844001799540 |
| 0.5937914264391607 | 0.1820433174038952 | 0.3687655083732629 |
| 0.5624869873271549 | 0.1134671754123961 | 0.4402570768913694 |
| 0.5529900469663356 | 0.0571377582829786 | 0.3301473861961144 |
| 0.5763949960303948 | 0.0711180933138056 | 0.1382264080750053 |
| 0.6066957750725496 | 0.1377068990921871 | 0.0620298743408312 |
| 0.5979420023560178 | 0.2351611491543196 | 0.5042999076374507 |
| 0.5047759485710255 | 0.3690447423062398 | 0.8367420953254899 |
| 0.5143968431810658 | 0.3908491252477257 | 0.0326277392833102 |
| 0.4775178217034189 | 0.4242498097865084 | 0.1016754050824215 |
| 0.4309139337356210 | 0.4366760494773954 | 0.9893783762829692 |
| 0.4208210231716317 | 0.4136835878452873 | 0.7978340586061577 |
| 0.4565431619302478 | 0.3810141834736648 | 0.7241965261753276 |
| 0.5639893327904270 | 0.3846321470011234 | 0.1701960591542630 |
| 0.6730861648214606 | 0.8689583778610945 | 0.0171494805821255 |
| 0.6706149347137774 | 0.9311479182749262 | 0.9320255887026675 |
| 0.7252869930041348 | 0.8891858780099507 | 0.1868838454930677 |
| 0.4645868839154466 | 0.9337836584986442 | 0.1484763681964369 |
| 0.5596953144385788 | 0.0185226011346964 | 0.6984134497283131 |
| 0.4969432368443709 | 0.8986345931762389 | 0.8321976111308440 |
| 0.0691654555469430 | 0.5863209793920158 | 0.4841999243266771 |
| 0.9845644579200470 | 0.6052654442550510 | 0.0255107066190383 |
| 0.1106768147509741 | 0.6637881491129796 | 0.1593297491110159 |
| 0.4036360795720957 | 0.5299072008079312 | 0.8081159526660151 |
| 0.3823175876536125 | 0.4320314621664235 | 0.3540977022657220 |
| 0.3349417074685049 | 0.5046115253034995 | 0.4919017950007808 |
| 0.4811740739397055 | 0.6484072513583002 | 0.1942841307044298 |
| 0.5836055701586760 | 0.7181664148898427 | 0.0075125935877296 |
| 0.8910571478441531 | 0.4973393289146137 | 0.9223258088028029 |
| 0.9722665028135870 | 0.5980185113556569 | 0.3794450432779978 |
| 0.8464948728906107 | 0.5299288573537837 | 0.2457617718930505 |
| 0.5435666499999350 | 0.1052613930236680 | 0.5877540057022069 |
| 0.5712472759098136 | 0.0286597015169660 | 0.0479943286193376 |
| 0.6247297319660710 | 0.1480223915057307 | 0.9135515202274999 |
| 0.4886876804266603 | 0.4425516577546516 | 0.2490815310010017 |
| 0.3833570344600263 | 0.4209450883635246 | 0.7062324646608976 |
| 0.4482669291492135 | 0.3631944268103758 | 0.5760702524553409 |
| 0.4675104810517031 | 0.7185375362568254 | 0.1474059035392673 |

|                    |                    |                    |
|--------------------|--------------------|--------------------|
| 0.5641278508326920 | 0.8075214002257444 | 0.9513831383097843 |
| 0.5796810129903065 | 0.8337342053802880 | 0.1958922503379236 |
| 0.6226938028052048 | 0.7515269709302369 | 0.2384823625615227 |
| 0.4978864686165657 | 0.6711915680498225 | 0.5048085816195637 |
| 0.6875427038418364 | 0.8434846843692234 | 0.9043324976539645 |
| 0.6523919586742650 | 0.9553450419421997 | 0.0393608389707405 |
| 0.6337724464200345 | 0.9150003497644124 | 0.8076297773775403 |
| 0.7256524291817442 | 0.9710244696521189 | 0.8845851521825309 |
| 0.7801308055565949 | 0.9305768262611058 | 0.1427733243440495 |
| 0.7304374945556007 | 0.8452587613805266 | 0.2397786157662486 |
| 0.7068415797676907 | 0.9088266617690393 | 0.3057848044583648 |
| 0.4964538049857480 | 0.7104649202541934 | 0.4320579622812122 |
| 0.5956301721769870 | 0.8157330551201339 | 0.0740773448525455 |

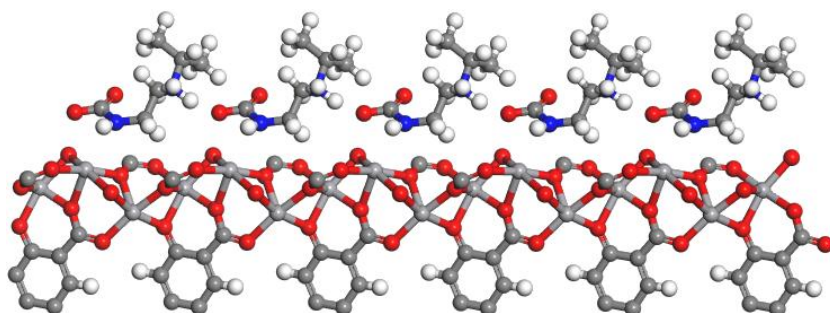

V-(E) TS<sub>2</sub>

|                      |                     |                    |    |   |
|----------------------|---------------------|--------------------|----|---|
| 1.0000000000000000   |                     |                    |    |   |
| 21.0651634190995516  | 0.0000000000000000  | 0.0000000000000000 |    |   |
| -11.2999427836998976 | 19.0542597178771622 | 0.0000000000000000 |    |   |
| -0.0193243159141720  | 0.0013249825062251  | 7.0099094767662518 |    |   |
| V                    | O                   | C                  | H  | N |
| 6                    | 20                  | 48                 | 32 | 2 |

Direct

|                    |                    |                    |
|--------------------|--------------------|--------------------|
| 0.3332933145287347 | 0.7452173432669297 | 0.8473333862482504 |
| 0.2678473207629006 | 0.6471932527657693 | 0.1856813477128088 |
| 0.3810771600181418 | 0.6869403866942864 | 0.5121803511839049 |
| 0.6962362978032246 | 0.3591603646865007 | 0.2162974158254332 |
| 0.5898588514228048 | 0.2917920011936970 | 0.8819550447242974 |
| 0.6267369606292501 | 0.3926552958154014 | 0.5485871404547281 |
| 0.4201864642060097 | 0.7865443363986585 | 0.6482865447793821 |
| 0.3657856684124364 | 0.7396759583531283 | 0.2834116894063965 |
| 0.3901903157541632 | 0.8206854934985564 | 0.0613678673959672 |
| 0.2301146735364148 | 0.6949635516703841 | 0.9838881601619456 |
| 0.2776014620000648 | 0.6791685313095485 | 0.6171766729129522 |
| 0.1895657670379140 | 0.6251184534232060 | 0.3980815610660307 |
| 0.3195079376776293 | 0.5986728174643970 | 0.3173176027716018 |
| 0.3333024542349558 | 0.6546193353869131 | 0.9532305661312890 |
| 0.3811460963060645 | 0.6188035211789895 | 0.7276006767626212 |
| 0.5333639343069553 | 0.7500241595505870 | 0.5837153388649861 |
| 0.5799495222858302 | 0.8207709101497447 | 0.3194306745402617 |

|                    |                    |                     |
|--------------------|--------------------|---------------------|
| 0.7308002408181105 | 0.4442503160190792 | 0.4146849199846315  |
| 0.6850554944354054 | 0.3856720256316232 | 0.7804454153841406  |
| 0.7727476559591667 | 0.4151241993953239 | -0.0001791155883309 |
| 0.6454113966137678 | 0.2604951364243892 | 0.0811792617998218  |
| 0.6293314381934223 | 0.3028801285503262 | 0.4467950787979194  |
| 0.5717483877572068 | 0.2191386978517551 | 0.6651490775324262  |
| 0.5366108253100045 | 0.3392575743538701 | 0.7461350524294443  |
| 0.5981810937914296 | 0.3549678915897769 | 0.1129660202137265  |
| 0.5693974910687256 | 0.4103010599543938 | 0.3302963506878712  |
| 0.4517215689524431 | 0.8497420193680940 | 0.5659559870607136  |
| 0.4456046208230592 | 0.8610785877161130 | 0.3669688062888092  |
| 0.4814477822199779 | 0.9299344336534595 | 0.2955732498800327  |
| 0.5233629075189471 | 0.9887609714321348 | 0.4093041457831645  |
| 0.5282401310073982 | 0.9769115635653844 | 0.6053819084627776  |
| 0.4934795294887893 | 0.9098663621647965 | 0.6810338003778276  |
| 0.3988054643488770 | 0.8049399863807285 | 0.2303927445981055  |
| 0.1637825705779913 | 0.6630037416886541 | 0.8987149460233045  |
| 0.1513446589615644 | 0.6415263159689720 | 0.7027976257479471  |
| 0.0787797048495241 | 0.6079521054008682 | 0.6308296124611426  |
| 0.0180732651733958 | 0.5948647215305085 | 0.7406553971335790  |
| 0.0313631212055092 | 0.6168702786823080 | 0.9328936401082958  |
| 0.1018462905425132 | 0.6498434330312340 | 0.0092666591425491  |
| 0.2087774751623041 | 0.6487361155260996 | 0.5667945530723139  |
| 0.3400718627879001 | 0.5581130610500592 | 0.2288734250214008  |
| 0.3537506861211150 | 0.5598599789839670 | 0.0276555451180111  |
| 0.3784238607302985 | 0.5164628144150820 | 0.9531858804088253  |
| 0.3903865588277689 | 0.4713239705792811 | 0.0656032047757362  |
| 0.3747263573703993 | 0.4687950225560440 | 0.2625440587026764  |
| 0.3503487862144546 | 0.5105373369397265 | 0.3411038476958396  |
| 0.3553644518272996 | 0.6127592322020122 | 0.8940258138892876  |
| 0.5438594241557581 | 0.7625470008968670 | 0.4037020164634518  |
| 0.5154459956595581 | 0.6982427101178740 | 0.0866156842447340  |
| 0.5930759450968955 | 0.7453322405104530 | 1.0034139029995863  |
| 0.7971528837662227 | 0.4793618637196024 | 0.5004478996661883  |
| 0.8103985052138427 | 0.4714654934540602 | 0.6971359318475669  |
| 0.8827978493375330 | 0.5103895917883970 | 0.7694686082274562  |
| 0.9428226656337720 | 0.5572105850113400 | 0.6591695399888056  |
| 0.9287542281170075 | 0.5650671972904879 | 0.4663965604242898  |
| 0.8583679502442106 | 0.5274543793551101 | 0.3897530797546975  |
| 0.7539354407786597 | 0.4219236167266524 | 0.8323405263875305  |
| 0.6180039349573795 | 0.1979433720328654 | 0.1679471576694391  |
| 0.5957917546889894 | 0.1847556850371498 | 0.3640664287945299  |
| 0.5658934517449751 | 0.1162824936721129 | 0.4367464232188070  |
| 0.5578973914645817 | 0.0602036039495806 | 0.3281343130600217  |
| 0.5817537959762816 | 0.0745292459683859 | 0.1365737236647136  |
| 0.6105231796995002 | 0.1409643981383871 | 0.0590761689719300  |

|                    |                    |                    |
|--------------------|--------------------|--------------------|
| 0.5985760549276419 | 0.2375064032317729 | 0.4985407955727328 |
| 0.5011830922074320 | 0.3680567672058274 | 0.8307720385452397 |
| 0.5105927202408476 | 0.3896421487751004 | 0.0265809013595796 |
| 0.4722145130140291 | 0.4215203798212657 | 0.0964335671313636 |
| 0.4241975896166711 | 0.4326584182918681 | 0.9854477544691488 |
| 0.4138516102860921 | 0.4093402750640747 | 0.7943433618583486 |
| 0.4511099176448999 | 0.3781978482684275 | 0.7197868923661714 |
| 0.5616222199599724 | 0.3850515046891060 | 0.1632933512269737 |
| 0.6747513669620291 | 0.8671813744306164 | 0.8569359132742937 |
| 0.6654697635321616 | 0.9207042742287164 | 0.7417943527146378 |
| 0.7261424414006421 | 0.8996920778643027 | 0.0277140916748416 |
| 0.4730675632323488 | 0.9361534935493412 | 0.1449550195335786 |
| 0.5609604766948509 | 0.0215714934676655 | 0.6994613882018991 |
| 0.4975140262495532 | 0.9013309044861151 | 0.8329999220617674 |
| 0.0711257155531565 | 0.5901497271279389 | 0.4832048999631659 |
| 0.9853164846452197 | 0.6086753215004376 | 0.0226633231782339 |
| 0.1118670003796982 | 0.6670875930584563 | 0.1577727812860205 |
| 0.3923515167308970 | 0.5225340538240745 | 0.8019256806946227 |
| 0.3817429935424640 | 0.4328364657047762 | 0.3547461216365278 |
| 0.3386369486618356 | 0.5086768305574066 | 0.4933858318175954 |
| 0.4974529298805142 | 0.6436145708353357 | 0.0520267384791002 |
| 0.6028623398872114 | 0.7182991778941589 | 0.8865325082967468 |
| 0.8909784114683931 | 0.5008792838133204 | 0.9176315065994171 |
| 0.9742199292289325 | 0.6022570180543613 | 0.3761666635490414 |
| 0.8480730737153105 | 0.5340801160221131 | 0.2406204759311350 |
| 0.5467806634033163 | 0.1079603530473938 | 0.5840449192520113 |
| 0.5781774579804296 | 0.0324623372060454 | 0.0475868653170297 |
| 0.6287455751751623 | 0.1514441102384390 | 0.9107855795454723 |
| 0.4835919883667756 | 0.4399581099153287 | 0.2435207677661584 |
| 0.3751756798577927 | 0.4152991659687534 | 0.7035019210639715 |
| 0.4427859173741009 | 0.3603617887116805 | 0.5718416266568929 |
| 0.4773975112619462 | 0.7101788912561112 | 0.0095509347518236 |
| 0.5656776998816744 | 0.7941652125824702 | 0.7931089976189980 |
| 0.5798084126668690 | 0.8294884076882607 | 0.0260088534603234 |
| 0.6356655362705187 | 0.7605763391629561 | 0.1129236326608407 |
| 0.4948762235770884 | 0.6565440995754588 | 0.3644394757973934 |
| 0.6946383045037132 | 0.8407064643448576 | 0.7621204007485548 |
| 0.6434136608179452 | 0.9463812311854423 | 0.8319032295851946 |
| 0.6285765415486337 | 0.8961676025998088 | 0.6189148720277465 |
| 0.7194014456656933 | 0.9616202104915674 | 0.6879196914378061 |
| 0.7798830369021776 | 0.9421529249459867 | 0.9774854361421678 |
| 0.7354436077336924 | 0.8618505828409195 | 0.1054766043013518 |
| 0.7035649720460168 | 0.9217594384769834 | 0.1289901266130070 |
| 0.5062658610614444 | 0.7006947848892544 | 0.2920609698325316 |
| 0.5989418838052409 | 0.8101888672116910 | 0.9193345539518777 |



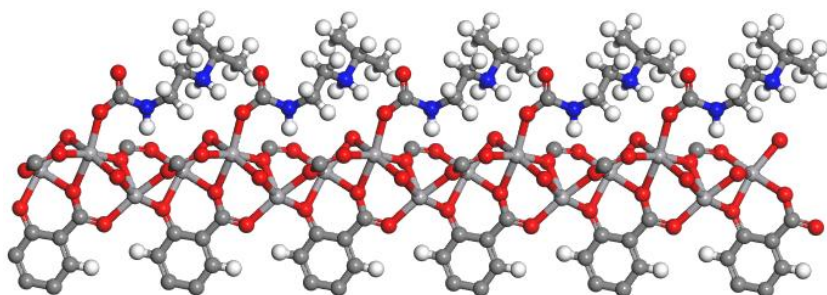

V-(F) Product

```

1.00000000000000
 21.0366290371778639  -0.3418382809233043   0.1052871616589888
-11.6438257506666591  18.9383516884557501  -0.0104081546216693
 -0.0471470333055754  -0.0002447962396778   7.0206609404449853

```

```

V   O   C   H   N
 6   20  48  32   2

```

Direct

```

0.3435992435448896  0.7469986812595689  0.8225386749129626
0.2695208138927962  0.6474756632559746  0.1614084638006621
0.3851364157936396  0.6847045093072714  0.4830211717699391
0.6950231661805981  0.3664634797661192  0.2099254599973460
0.5872002427164726  0.2928761664444728  0.8758908948383741
0.6216274430692159  0.3939445138464955  0.5424196078355070
0.4356760506122633  0.7860033769141753  0.6278963309093823
0.3721781757939980  0.7400245733381844  0.2596778681342759
0.4052756206323431  0.8235506866207646  0.0380601257421277
0.2390245053789970  0.7005800530947276  0.9594246929354038
0.2829863347650203  0.6814381506813210  0.5932256498775841
0.1920942073167177  0.6298147443085764  0.3751073724270818
0.3161359269930024  0.5952263908039728  0.2920256675416569
0.3366896124134383  0.6542132705640303  0.9320655412660469
0.3783725942558574  0.6144828773429412  0.7032648499136543
0.4982249683597960  0.7152226289066892  0.4124736836340984
0.6049851989808539  0.7304839033876703  0.2879876659054125
0.7276833041816735  0.4516415863870319  0.4080240902029580
0.6825025527931939  0.3911683178105604  0.7739079138059237
0.7724191590154428  0.4259535707346306  0.9926475070850463
0.6464829956039257  0.2665791855587291  0.0758361534669975
0.6278428432032083  0.3063083048027114  0.4408889926556325
0.5721612702479448  0.2204620929411930  0.6599265464280026
0.5300229313169541  0.3350895773974017  0.7400940152807514
0.5930550235139813  0.3545282034582945  0.1068165995014369
0.5616539253906636  0.4070018047302865  0.3235345042662954
0.4639442245938623  0.8503446890667188  0.5472295176998152
0.4568247508751808  0.8625971238658546  0.3497541900362723
0.4914122213441361  0.9331062437246468  0.2835193323320681
0.5325192912042798  0.9927375093500328  0.3997800359839285

```

|                    |                    |                    |
|--------------------|--------------------|--------------------|
| 0.5382296717016631 | 0.9800379866253721 | 0.5941167926257508 |
| 0.5050513210031886 | 0.9112935071690536 | 0.6650239583945805 |
| 0.4098248195952665 | 0.8063278132267949 | 0.2082016670067026 |
| 0.1714692945403267 | 0.6712328749466541 | 0.8747380094971942 |
| 0.1569623032695818 | 0.6494249334616585 | 0.6793832127973101 |
| 0.0830030150238833 | 0.6178691686327443 | 0.6091511633384228 |
| 0.0229952466960173 | 0.6070611783389676 | 0.7205624490749627 |
| 0.0386155220117010 | 0.6301359081802779 | 0.9116137249656763 |
| 0.1105192336652137 | 0.6612895635304430 | 0.9860838205210347 |
| 0.2132636712865630 | 0.6536292055748700 | 0.5432909435062266 |
| 0.3356253402465427 | 0.5539401699637342 | 0.2056427973886865 |
| 0.3515611873553461 | 0.5567106700642852 | 0.0058546903755982 |
| 0.3759365379187262 | 0.5133643523547344 | 0.9337036413830263 |
| 0.3845951079269084 | 0.4669180561617245 | 0.0476274374860638 |
| 0.3657074609592464 | 0.4627246626265932 | 0.2424538633548730 |
| 0.3419532710844951 | 0.5046349847915670 | 0.3186842391914096 |
| 0.3544760865296895 | 0.6096202820199798 | 0.8713613289173694 |
| 0.5406818275455507 | 0.7196237971658038 | 0.2685213740222523 |
| 0.5412812683382952 | 0.6969634221921236 | 0.9248803542312563 |
| 0.6115104449123305 | 0.7595812418044053 | 0.8324134720826695 |
| 0.7958109878445482 | 0.4886203651731811 | 0.4915307221820413 |
| 0.8100678391391999 | 0.4815343482758429 | 0.6874962080973293 |
| 0.8845248994666239 | 0.5220276637278171 | 0.7563206395402825 |
| 0.9456216905756480 | 0.5693836284098756 | 0.6429955080352068 |
| 0.9304970052836169 | 0.5768109892229312 | 0.4513471585948304 |
| 0.8580459200773839 | 0.5378579244429974 | 0.3782935960637380 |
| 0.7528242959021400 | 0.4308114975101722 | 0.8247656344163691 |
| 0.6211955785864196 | 0.2038396521237986 | 0.1625395047124447 |
| 0.5986362311732083 | 0.1890079356362391 | 0.3585964526493830 |
| 0.5707738244501348 | 0.1200132300628080 | 0.4306084310008115 |
| 0.5653173116042418 | 0.0652569742487126 | 0.3211402853613729 |
| 0.5897289292444599 | 0.0813599415264712 | 0.1299887287614387 |
| 0.6164925295498983 | 0.1482145168820869 | 0.0532309334523678 |
| 0.5990563539649240 | 0.2404901080044402 | 0.4932002273725443 |
| 0.4945976520575670 | 0.3637255884114984 | 0.8228522341212058 |
| 0.5038781185759539 | 0.3859555259048668 | 0.0178077847735553 |
| 0.4657383535506546 | 0.4178063832354676 | 0.0846635459421166 |
| 0.4181471044490125 | 0.4282635084450452 | 0.9710868220694954 |
| 0.4078648950774629 | 0.4042673954213752 | 0.7809577150846878 |
| 0.4448121076364954 | 0.3730638526453738 | 0.7095110053205383 |
| 0.5549485167581123 | 0.3825673508936474 | 0.1562503334736696 |
| 0.6643035818273269 | 0.8595247818713329 | 0.5907819417258126 |
| 0.6425671769824560 | 0.8914166058176827 | 0.4301133618194928 |
| 0.7170766850687570 | 0.9166189964836319 | 0.7329340650819614 |
| 0.4823246558242474 | 0.9398397202323352 | 0.1341939933418658 |
| 0.5702896663196739 | 0.0251042751343866 | 0.6904635051343675 |

|                    |                    |                    |
|--------------------|--------------------|--------------------|
| 0.5096329979147792 | 0.9021655000334720 | 0.8160797904482604 |
| 0.0733567997007942 | 0.5993465150379803 | 0.4621426824780488 |
| 0.9932956563897690 | 0.6240229772679512 | 0.0020530504391955 |
| 0.1224134704281839 | 0.6791775564400913 | 0.1338526986652697 |
| 0.3918918539345196 | 0.5202284478851780 | 0.7837706091852834 |
| 0.3699856466491451 | 0.4254861026251279 | 0.3350234638368932 |
| 0.3283531855973025 | 0.5018744996951213 | 0.4697296673779698 |
| 0.5565917817237969 | 0.6590992577065553 | 0.9721884342557305 |
| 0.6414765339367379 | 0.7396988093502819 | 0.7530554292737111 |
| 0.8935103741266940 | 0.5129947777755567 | 0.9038536273523705 |
| 0.9767654224178761 | 0.6145791152768394 | 0.3590487439411842 |
| 0.8468265575785359 | 0.5439993197634511 | 0.2299705140336763 |
| 0.5510411218812744 | 0.1100324823619770 | 0.5776850428360979 |
| 0.5882455948689355 | 0.0404114980154414 | 0.0409713606985316 |
| 0.6352389247388677 | 0.1602824620247648 | 0.9053161613198596 |
| 0.4772530742206000 | 0.4371041879317573 | 0.2309261031056825 |
| 0.3696076790164717 | 0.4098859700064445 | 0.6882402481714122 |
| 0.4366553314145534 | 0.3548688029967128 | 0.5620936442694661 |
| 0.4966668658621092 | 0.6697531292547112 | 0.8172850007946285 |
| 0.5570191486194795 | 0.7624704273150327 | 0.5805276658857871 |
| 0.5644934104250908 | 0.8184590893823478 | 0.7515651856055893 |
| 0.6488595010761651 | 0.7966236765220956 | 0.9425448532747920 |
| 0.4569956284390903 | 0.7008209144316776 | 0.0815537686591698 |
| 0.6904053865293981 | 0.8325493082425097 | 0.5282701418291699 |
| 0.6205502563516246 | 0.9228683073786066 | 0.4853788857215706 |
| 0.6005963379137328 | 0.8505097150444126 | 0.3341987369440182 |
| 0.6932558674278635 | 0.9272465279184834 | 0.3458912598797904 |
| 0.7652095914234479 | 0.9602346571464175 | 0.6553586649510954 |
| 0.7395520620052914 | 0.8970039494461681 | 0.8404794413558688 |
| 0.6884422812044703 | 0.9394342635733809 | 0.8059525334071730 |
| 0.5117700463655723 | 0.7156424492680126 | 0.0867706670074792 |
| 0.5945721582328111 | 0.7994167476345739 | 0.6889795085185944 |

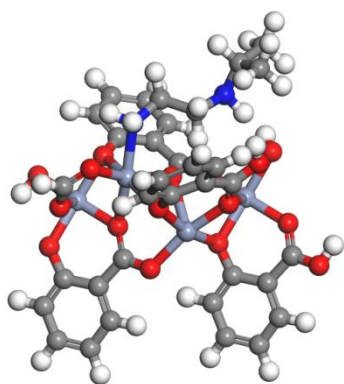

Cr-(A) i-2-MOF

-1 1

|    |    |             |            |             |
|----|----|-------------|------------|-------------|
| H  | 0  | 1.22128300  | 7.58750300 | -0.73557600 |
| Cr | -1 | -1.89211000 | 1.71362400 | -1.74949100 |

|    |    |             |             |             |
|----|----|-------------|-------------|-------------|
| O  | -1 | -3.78661500 | 0.91818700  | -1.93354700 |
| O  | -1 | -0.12731400 | 2.49418300  | -1.05956500 |
| O  | -1 | -2.77498800 | 3.48024600  | -1.32480700 |
| O  | -1 | -3.04846200 | 5.47606700  | -0.39277500 |
| O  | -1 | -1.99922700 | 1.49635900  | 0.74377100  |
| O  | -1 | -4.09522800 | 0.93794000  | 1.24188800  |
| H  | 0  | -3.74083700 | 0.28575900  | -2.66135400 |
| C  | -1 | 0.16873600  | 3.81453200  | -1.03247600 |
| C  | -1 | -0.81649700 | 4.82921800  | -0.86436400 |
| C  | -1 | -0.40999400 | 6.16839200  | -0.73429600 |
| C  | -1 | 0.92903100  | 6.54786500  | -0.82937400 |
| C  | -1 | 1.88268500  | 5.54112900  | -1.06623000 |
| C  | -1 | 1.51792600  | 4.20690100  | -1.16683900 |
| C  | -1 | -2.27654300 | 4.56489000  | -0.84541700 |
| C  | -1 | -2.42545800 | 0.28094500  | 2.78679500  |
| C  | -1 | -3.41975800 | 0.04264000  | 3.75130700  |
| C  | -1 | -2.85163900 | 0.93207100  | 1.52585800  |
| H  | 0  | -3.90641000 | -0.68565900 | 5.72754400  |
| C  | 0  | -5.30843600 | -2.56289900 | -0.63103200 |
| C  | 0  | -6.17332300 | -1.94608300 | 0.47393000  |
| C  | 0  | -6.04115500 | -2.52260600 | -1.96735600 |
| H  | -1 | -1.18379900 | 6.91042800  | -0.53660100 |
| H  | -1 | -4.44692500 | 0.29351900  | 3.48521900  |
| H  | -1 | -4.59865600 | 0.32848600  | 1.79537700  |
| H  | 0  | -5.12796400 | -3.61627500 | -0.37142700 |
| H  | 0  | -6.39452500 | -0.89685500 | 0.24187100  |
| H  | 0  | -5.67869100 | -1.99235000 | 1.45055000  |
| H  | 0  | -7.12778900 | -2.47404100 | 0.57349600  |
| H  | 0  | -6.21102500 | -1.48306600 | -2.27396500 |
| H  | 0  | -7.01582900 | -3.01645000 | -1.90440300 |
| H  | 0  | -5.44908600 | -3.01102600 | -2.74648300 |
| N  | 0  | -4.00637500 | -1.92887200 | -0.79755700 |
| H  | 0  | 6.30917000  | 3.81002900  | 0.57697800  |
| H  | -1 | 2.93098900  | 5.82142500  | -1.18382700 |
| Cr | -1 | 3.19349900  | -2.06419400 | -0.43815000 |
| Cr | -1 | 0.03002800  | 1.39396800  | 0.70256900  |
| Cr | 0  | 0.60912500  | -1.64470800 | 0.84492800  |
| O  | 0  | 1.31748600  | -2.82359000 | -0.65249400 |
| O  | 0  | -0.40145000 | -0.62066700 | -0.57950700 |
| O  | -1 | -0.99242400 | 0.07799600  | -2.59235700 |
| O  | -1 | 4.95880900  | -1.28350300 | 0.25187500  |
| O  | 0  | 2.31473800  | -0.33856800 | 0.09370600  |
| O  | -1 | 2.03769400  | 1.69837700  | 0.91865600  |
| O  | 0  | -0.10198300 | 0.01405000  | 2.16433300  |
| O  | -1 | 3.08731500  | -2.28132000 | 2.05564600  |
| O  | 0  | 0.98950400  | -2.74716500 | 2.65206800  |

|   |    |             |             |             |
|---|----|-------------|-------------|-------------|
| C | -1 | 0.79188400  | -3.04371300 | -1.85505400 |
| C | -1 | -0.06502100 | -2.09863500 | -2.49678500 |
| C | -1 | -0.48275100 | -2.32429400 | -3.81866300 |
| C | -1 | -0.14856200 | -3.48549100 | -4.51565200 |
| C | -1 | 0.64969200  | -4.43634300 | -3.85434000 |
| C | -1 | 1.11145700  | -4.22460600 | -2.56470700 |
| C | -1 | -0.54931000 | -0.85709800 | -1.84418200 |
| C | -1 | 5.25480900  | 0.03690200  | 0.27889100  |
| C | -1 | 4.26965100  | 1.05152200  | 0.44705200  |
| C | -1 | 4.67607400  | 2.39076100  | 0.57709300  |
| C | -1 | 6.01509900  | 2.77023400  | 0.48201200  |
| C | -1 | 6.96875200  | 1.76350000  | 0.24515700  |
| C | -1 | 6.60407200  | 0.42921200  | 0.14456800  |
| C | -1 | 2.80949300  | 0.78726100  | 0.46596900  |
| C | -1 | -1.08099200 | -0.12293700 | 3.04614200  |
| H | 0  | 2.59444100  | -3.41700200 | 3.70688800  |
| C | -1 | -3.12662300 | -0.51774800 | 4.99385200  |
| C | -1 | -1.78352000 | -0.84314700 | 5.26548200  |
| C | -1 | -0.78478200 | -0.65212300 | 4.32368900  |
| C | -1 | 2.23341000  | -2.84516600 | 2.83599900  |
| C | 0  | -2.11799400 | -3.26436100 | 0.08550500  |
| C | 0  | -3.05476300 | -2.08069300 | 0.28560600  |
| H | 0  | -1.25412900 | -3.22376700 | 1.94194800  |
| H | -1 | -1.06607700 | -1.53939500 | -4.30060300 |
| H | -1 | 1.75329900  | -4.96226800 | -2.07896600 |
| H | -1 | 3.90234600  | 3.13273900  | 0.77480400  |
| H | -1 | 2.26299200  | 3.43232400  | -1.35075900 |
| H | -1 | -1.52614800 | -1.24670900 | 6.24646600  |
| H | -1 | 0.25273100  | -0.90522700 | 4.54373300  |
| H | 0  | -1.76550100 | -3.25599500 | -0.94728300 |
| H | 0  | -2.64905100 | -4.21326500 | 0.24252500  |
| H | 0  | -2.42221900 | -1.19174200 | 0.29914000  |
| H | 0  | -3.52345500 | -2.15992500 | 1.28293700  |
| H | 0  | -0.37644900 | -3.99986200 | 0.84029400  |
| N | 0  | -0.94490800 | -3.16696900 | 0.97351900  |
| H | 0  | -0.48725200 | -3.64427600 | -5.53352600 |
| H | -1 | 0.90626700  | -5.36231200 | -4.37164400 |
| H | -1 | 8.01705600  | 2.04379400  | 0.12756100  |
| O | -1 | 4.09519700  | -3.69905500 | -1.28103400 |
| H | 0  | 5.03885300  | -3.53300800 | -1.17867100 |
| H | -1 | 7.34906000  | -0.34530600 | -0.03937100 |
| H | 0  | -4.10858900 | -0.93557800 | -1.02473400 |
| H | 0  | -3.97041200 | 5.19119800  | -0.50212900 |

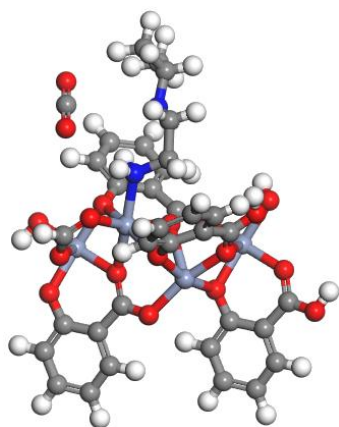

Cr-(B) Complex

-1 1

|    |    |             |             |             |
|----|----|-------------|-------------|-------------|
| H  | 0  | -8.14979800 | -0.66185100 | -1.20598400 |
| Cr | -1 | -1.68331600 | -2.44211700 | -1.82458300 |
| O  | -1 | -0.54747900 | -4.16361600 | -1.91115800 |
| O  | -1 | -2.87347700 | -0.88391900 | -1.19523600 |
| O  | -1 | -3.25393700 | -3.67590200 | -1.49772200 |
| O  | -1 | -5.19603100 | -4.38636700 | -0.69228700 |
| O  | -1 | -1.62674700 | -2.49457200 | 0.68234100  |
| O  | -1 | -0.69011300 | -4.43968100 | 1.20638800  |
| H  | 0  | 0.15550400  | -4.00359100 | -2.55263800 |
| C  | -1 | -4.22535200 | -0.87965600 | -1.24612000 |
| C  | -1 | -5.01594100 | -2.06028000 | -1.13443400 |
| C  | -1 | -6.41639100 | -1.94989400 | -1.09511200 |
| C  | -1 | -7.06777600 | -0.72359500 | -1.22734100 |
| C  | -1 | -6.27454300 | 0.42591500  | -1.39918800 |
| C  | -1 | -4.44865800 | -3.42990500 | -1.09030700 |
| C  | -1 | -0.03052900 | -3.61832400 | 3.74339100  |
| C  | -1 | -0.93245400 | -3.22194800 | 1.48534100  |
| H  | 0  | 0.71516300  | -3.96794700 | 5.74255400  |
| C  | 0  | 6.11788900  | -2.19793000 | -2.40801000 |
| H  | -1 | -6.98707600 | -2.86598900 | -0.94164300 |
| H  | -1 | -0.06070800 | -4.67224500 | 3.46661200  |
| H  | 0  | 3.85383100  | -3.69314000 | 0.56896700  |
| H  | 0  | 3.89235500  | -2.01107400 | -1.26837600 |
| H  | 0  | 5.50614800  | -3.81589100 | -1.14165300 |
| H  | 0  | 5.27704800  | -2.28576400 | -3.10523100 |
| H  | 0  | 6.96329800  | -2.74851500 | -2.83082300 |
| H  | 0  | -5.61419600 | 5.13912500  | 0.29717500  |
| H  | -1 | -6.76492200 | 1.39047500  | -1.54242000 |
| Cr | -1 | 0.85293500  | 3.35743800  | -0.32231300 |
| Cr | -1 | -1.93764200 | -0.49277300 | 0.62402100  |
| Cr | 0  | 0.90690800  | 0.69519200  | 0.95798500  |
| O  | 0  | 1.94822700  | 1.66389200  | -0.45826200 |
| O  | 0  | 0.20217400  | -0.50569800 | -0.51845000 |

|   |    |             |             |             |
|---|----|-------------|-------------|-------------|
| O | -1 | -0.21815100 | -1.22605200 | -2.57334500 |
| O | -1 | -0.33726700 | 4.91539600  | 0.30697700  |
| O | 0  | -0.68949100 | 2.13168500  | 0.10089500  |
| O | -1 | -2.65980300 | 1.41286200  | 0.80993800  |
| O | 0  | -0.62118700 | -0.34723000 | 2.16716800  |
| O | -1 | 0.90938600  | 3.30456700  | 2.18454600  |
| O | 0  | 1.80400000  | 1.34631000  | 2.79123900  |
| O | 0  | 5.33739000  | 1.31003500  | 0.98551000  |
| O | 0  | 6.93176800  | 1.04003900  | -0.69235000 |
| C | -1 | 2.39214500  | 1.16959500  | -1.61072600 |
| C | -1 | 1.70012600  | 0.14531900  | -2.31854700 |
| C | -1 | 2.14135200  | -0.23028200 | -3.59850200 |
| C | -1 | 3.28186200  | 0.32414500  | -4.17743500 |
| C | -1 | 3.98267100  | 1.30087800  | -3.44477100 |
| C | -1 | 3.55192700  | 1.71797000  | -2.19747000 |
| C | -1 | 0.53695100  | -0.58499200 | -1.76849200 |
| C | -1 | -1.68914300 | 4.91957800  | 0.25615700  |
| C | -1 | -2.47971700 | 3.73903800  | 0.36777300  |
| C | -1 | -3.88014300 | 3.84943000  | 0.40713500  |
| C | -1 | -4.53152900 | 5.07573300  | 0.27492100  |
| C | -1 | -3.73833500 | 6.22515500  | 0.10304700  |
| C | -1 | -4.88979800 | 0.35542000  | -1.40834700 |
| C | -1 | -1.91236200 | 2.36948900  | 0.41206400  |
| C | -1 | -0.31683800 | -1.29118400 | 3.05014000  |
| C | -1 | -0.43095200 | -2.68462900 | 2.77325800  |
| C | -1 | 0.41897900  | -3.23092000 | 5.00531700  |
| C | -1 | 0.46204100  | -1.85200300 | 5.28885200  |
| C | -1 | 0.10350400  | -0.90453500 | 4.34310900  |
| C | -1 | 1.60381600  | 2.57768300  | 2.98767900  |
| C | 0  | 6.13010200  | 1.16657800  | 0.14330500  |
| C | 0  | 2.61300000  | -1.97894800 | 0.91516400  |
| C | 0  | 3.97887800  | -2.59829400 | 0.65654600  |
| C | 0  | 5.75466700  | -2.74229100 | -1.03347100 |
| C | 0  | 6.93532400  | -2.63905800 | -0.07556100 |
| H | -1 | 1.54705400  | -0.96715700 | -4.13903500 |
| H | -1 | 4.10863400  | 2.46259500  | -1.62876200 |
| H | -1 | -4.45086800 | 2.93325000  | 0.56059500  |
| H | -1 | -4.28198300 | 1.25017000  | -1.54427800 |
| H | -1 | 0.77268900  | -1.52703300 | 6.28312300  |
| H | -1 | 0.13647800  | 0.16086700  | 4.57238600  |
| H | 0  | 2.17237100  | -2.41504700 | 1.81566800  |
| H | 0  | 1.93835400  | -2.21430200 | 0.08466900  |
| H | 0  | 3.31241100  | -0.16306300 | 0.37998700  |
| H | 0  | 4.62802900  | -2.42167100 | 1.52310400  |
| H | 0  | 3.07204700  | -0.29434100 | 1.96962500  |
| H | 0  | 6.39201400  | -1.14037000 | -2.33817600 |

|   |    |             |             |             |
|---|----|-------------|-------------|-------------|
| H | 0  | 7.78791700  | -3.20027900 | -0.47010700 |
| H | 0  | 6.70199200  | -3.04726200 | 0.91203000  |
| H | 0  | 7.24090700  | -1.59504700 | 0.04598000  |
| N | 0  | 2.64947700  | -0.51709600 | 1.07003700  |
| N | 0  | 4.59115700  | -2.00760600 | -0.52705100 |
| H | 0  | 3.61388700  | 0.01773200  | -5.16329700 |
| H | -1 | 4.89676900  | 1.72259800  | -3.86669200 |
| H | -1 | -4.22867400 | 7.18980200  | -0.04016300 |
| O | -1 | 2.31803000  | 4.57315600  | -1.07110200 |
| H | 0  | 1.96010200  | 5.46401100  | -0.98943600 |
| C | -1 | -2.35358800 | 6.15465700  | 0.09388900  |
| H | 0  | 2.03187200  | 3.03736500  | 3.89420500  |
| H | -1 | -1.74573500 | 7.04949700  | -0.04201900 |
| H | 0  | -0.02611900 | -4.82322000 | 1.79229500  |
| H | 0  | -4.70993900 | -5.22225300 | -0.78202300 |

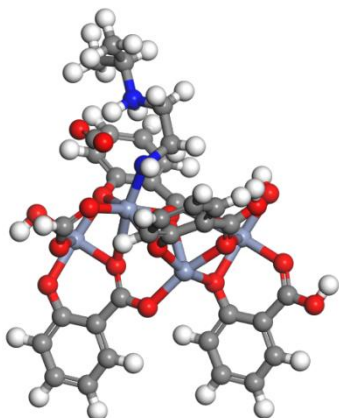

Cr-(C) TS<sub>1</sub>

-1 1

|    |    |             |             |             |
|----|----|-------------|-------------|-------------|
| H  | 0  | -8.24874400 | -0.17724100 | -0.57671400 |
| Cr | -1 | -1.98651900 | -2.25763900 | -1.92747500 |
| O  | -1 | -0.96762700 | -4.02851000 | -2.22240300 |
| O  | -1 | -3.01752200 | -0.68023000 | -1.09716100 |
| O  | -1 | -3.58909000 | -3.42387600 | -1.51809000 |
| O  | -1 | -5.48447500 | -4.07841900 | -0.56714100 |
| O  | -1 | -1.69540700 | -2.46825200 | 0.55475500  |
| O  | -1 | -0.82969600 | -4.48922100 | 0.87346500  |
| H  | 0  | -0.31139400 | -3.86533500 | -2.91074700 |
| C  | -1 | -4.36551300 | -0.60082100 | -1.01461300 |
| C  | -1 | -5.21021700 | -1.74230700 | -0.89267400 |
| C  | -1 | -6.59164200 | -1.56012900 | -0.70973800 |
| C  | -1 | -7.17913100 | -0.29503800 | -0.70779500 |
| C  | -1 | -6.33934600 | 0.81902300  | -0.89152400 |
| C  | -1 | -4.72312700 | -3.14030500 | -0.98198700 |
| C  | -1 | 0.11509400  | -3.86294000 | 3.37570100  |
| C  | -1 | -0.97214600 | -3.27992800 | 1.24323900  |
| H  | 0  | 1.02419800  | -4.37508100 | 5.26957300  |
| C  | 0  | 6.70429900  | -0.35171100 | -2.32348200 |



|    |    |             |             |             |
|----|----|-------------|-------------|-------------|
| H  | -1 | -7.19824400 | -2.45226900 | -0.55294800 |
| H  | -1 | -0.00337700 | -4.89458000 | 3.04411500  |
| H  | 0  | 4.22658900  | -3.35617200 | -1.18585900 |
| H  | 0  | 4.27446300  | -1.01525000 | -1.83588600 |
| H  | 0  | 6.17278400  | -2.43475800 | -2.25087100 |
| H  | 0  | 6.03275200  | -0.12186600 | -3.15497900 |
| H  | 0  | 7.70071500  | -0.53088500 | -2.73369400 |
| H  | 0  | -5.24424900 | 5.37724000  | 0.99393500  |
| H  | -1 | -6.78332700 | 1.81535200  | -0.93112800 |
| Cr | -1 | 1.01869100  | 3.29411400  | -0.35639800 |
| Cr | -1 | -1.89181900 | -0.45299300 | 0.64056000  |
| Cr | 0  | 1.30198600  | 0.32614500  | 0.81150200  |
| O  | 0  | 2.00289800  | 1.53287000  | -0.68146000 |
| O  | 0  | 0.17723900  | -0.51632500 | -0.71293200 |
| O  | -1 | -0.52995300 | -1.07721600 | -2.74662100 |
| O  | -1 | -0.01231200 | 4.87152400  | 0.47391500  |
| O  | 0  | -0.57305000 | 2.14244300  | 0.09620000  |
| O  | -1 | -2.47931200 | 1.47325000  | 1.00391100  |
| O  | 0  | -0.42604900 | -0.47182800 | 2.05685900  |
| O  | -1 | 1.30975600  | 3.08341500  | 2.12580600  |
| O  | 0  | 2.20550800  | 1.05659300  | 2.51800900  |
| O  | 0  | 4.31559700  | -0.95706000 | 3.06909200  |
| O  | 0  | 4.97989400  | 0.33411600  | 1.25950400  |
| C  | -1 | 2.29667900  | 1.11195200  | -1.91135300 |
| C  | -1 | 1.48149900  | 0.17155000  | -2.60450700 |
| C  | -1 | 1.77628600  | -0.14701100 | -3.94081700 |
| C  | -1 | 2.88740100  | 0.38068900  | -4.59677000 |
| C  | -1 | 3.71103700  | 1.27139300  | -3.88248700 |
| C  | -1 | 3.42603900  | 1.63272300  | -2.57731900 |
| C  | -1 | 0.33496800  | -0.52863900 | -1.98514100 |
| C  | -1 | -1.36034800 | 4.95084600  | 0.55644000  |
| C  | -1 | -2.20500700 | 3.80944700  | 0.67840200  |
| C  | -1 | -3.58643100 | 3.99162200  | 0.86133900  |
| C  | -1 | -4.17392000 | 5.25671500  | 0.86328200  |
| C  | -1 | -3.33418300 | 6.37069000  | 0.67952800  |
| C  | -1 | -4.96830800 | 0.67556700  | -1.04069500 |
| C  | -1 | -1.71791600 | 2.41144800  | 0.58908900  |
| C  | -1 | -0.09793600 | -1.48507800 | 2.84674600  |
| C  | -1 | -0.31984300 | -2.85092200 | 2.50393600  |
| C  | -1 | 0.70444000  | -3.57896500 | 4.60721600  |
| C  | -1 | 0.85552300  | -2.22452000 | 4.96262300  |
| C  | -1 | 0.46536400  | -1.20258200 | 4.11177100  |
| C  | -1 | 2.03306500  | 2.27182600  | 2.81431500  |
| C  | 0  | 4.45573200  | -0.36341400 | 2.06610300  |
| C  | 0  | 2.72166700  | -2.20438900 | -0.10439400 |
| C  | 0  | 4.16759500  | -2.54549600 | -0.45403100 |

|   |    |             |             |             |
|---|----|-------------|-------------|-------------|
| C | 0  | 6.25338500  | -1.58700800 | -1.56334500 |
| C | 0  | 7.18178500  | -1.93448300 | -0.41264500 |
| H | -1 | 1.09090800  | -0.81626800 | -4.46110700 |
| H | -1 | 4.07713400  | 2.31004900  | -2.02493100 |
| H | -1 | -4.19308000 | 3.09939900  | 1.01810400  |
| H | -1 | -4.32440600 | 1.54337100  | -1.18491600 |
| H | -1 | 1.27779500  | -1.97879100 | 5.93832100  |
| H | -1 | 0.58277200  | -0.15664600 | 4.39652700  |
| H | 0  | 2.24203300  | -3.16166900 | 0.15202900  |
| H | 0  | 2.23736000  | -1.87029900 | -1.03009000 |
| H | 0  | 4.84846300  | -0.60341200 | -0.35641000 |
| H | 0  | 4.73323800  | -2.82907800 | 0.43553500  |
| H | 0  | 2.47529800  | -1.69068300 | 1.82002100  |
| H | 0  | 6.76117500  | 0.52256300  | -1.66699000 |
| H | 0  | 8.19394300  | -2.05121600 | -0.80677700 |
| H | 0  | 6.91123900  | -2.87163300 | 0.07833500  |
| H | 0  | 7.20104600  | -1.13407400 | 0.33355900  |
| N | 0  | 2.55350100  | -1.20123400 | 0.93136600  |
| N | 0  | 4.84924100  | -1.36070000 | -1.06005400 |
| H | 0  | 3.10826300  | 0.11803200  | -5.62558000 |
| H | -1 | 4.60421500  | 1.66918900  | -4.36770200 |
| H | -1 | -3.77811700 | 7.36710500  | 0.63994700  |
| O | -1 | 2.47521100  | 4.47445100  | -1.17556900 |
| H | 0  | 2.19116800  | 5.37494000  | -0.98329800 |
| C | -1 | -1.96314300 | 6.22723400  | 0.53035700  |
| H | 0  | 2.52403900  | 2.64692300  | 3.72963000  |
| H | -1 | -1.31919600 | 7.09512300  | 0.38616100  |
| H | 0  | -0.13858000 | -4.94202900 | 1.37157000  |
| H | 0  | -5.05930700 | -4.93159300 | -0.75220500 |

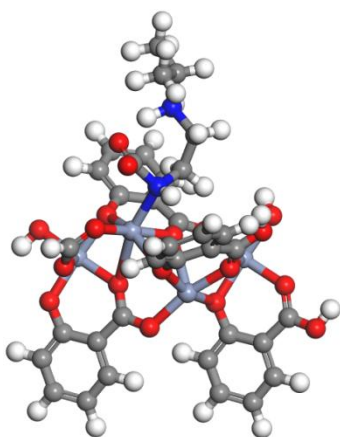

Cr-(D) Intermediate from Gaussian

|    |    |             |             |             |
|----|----|-------------|-------------|-------------|
| -1 | 1  |             |             |             |
| H  | 0  | -7.73902400 | -2.76253900 | -0.42721100 |
| Cr | -1 | -1.16097100 | -2.63674700 | -1.86981800 |
| O  | -1 | 0.39153400  | -3.96601400 | -2.15944500 |
| O  | -1 | -2.65236500 | -1.48303300 | -1.04199100 |

|    |    |             |             |             |
|----|----|-------------|-------------|-------------|
| O  | -1 | -2.27044400 | -4.26655500 | -1.41294500 |
| O  | -1 | -3.82083900 | -5.50267500 | -0.41620300 |
| O  | -1 | -0.78232500 | -2.68759400 | 0.60901500  |
| O  | -1 | 0.71866900  | -4.29172700 | 0.93935700  |
| H  | 0  | 0.95565200  | -3.59361400 | -2.84812700 |
| C  | -1 | -3.94687000 | -1.86103100 | -0.93440000 |
| C  | -1 | -4.35521900 | -3.21778600 | -0.77996400 |
| C  | -1 | -5.71450700 | -3.50832700 | -0.57281500 |
| C  | -1 | -6.69427100 | -2.51553100 | -0.57732700 |
| C  | -1 | -6.28213500 | -1.18747400 | -0.79305200 |
| C  | -1 | -3.42630100 | -4.37125900 | -0.85897000 |
| C  | -1 | 1.43053500  | -3.33409400 | 3.41367100  |
| C  | -1 | 0.18160900  | -3.19413700 | 1.29471300  |
| H  | 0  | 2.48656000  | -3.47134500 | 5.29526200  |
| C  | 0  | 7.75922600  | -0.51116600 | -1.81220700 |
| H  | -1 | -5.98238600 | -4.54943000 | -0.39168600 |
| H  | -1 | 1.66257800  | -4.35165800 | 3.09905200  |
| H  | 0  | 4.35949400  | -2.67036400 | -1.16183200 |
| H  | 0  | 5.28492000  | -0.75423900 | -2.02826700 |
| H  | 0  | 6.93116500  | -2.37548600 | -1.12644900 |
| H  | 0  | 7.45724200  | -0.66101700 | -2.85337500 |
| H  | 0  | 8.79931700  | -0.83089600 | -1.71641600 |
| H  | 0  | -6.76356200 | 3.50941400  | 1.00604700  |
| H  | -1 | -7.03670800 | -0.40010400 | -0.83809000 |
| Cr | -1 | -0.18397200 | 3.63311300  | -0.43598800 |
| Cr | -1 | -1.64592500 | -0.85520000 | 0.67014900  |
| Cr | 0  | 1.07929000  | 0.98484000  | 0.75945000  |
| O  | 0  | 1.33913500  | 2.28479900  | -0.74018100 |
| O  | 0  | 0.31184500  | -0.25146600 | -0.71773200 |
| O  | -1 | -0.19925700 | -1.05093400 | -2.73369700 |
| O  | -1 | -1.67536600 | 4.78682700  | 0.39183800  |
| O  | 0  | -1.28800600 | 2.01969000  | 0.06102200  |
| O  | -1 | -2.84385600 | 0.76708800  | 1.01760400  |
| O  | 0  | -0.20722600 | -0.34113100 | 2.03533500  |
| O  | -1 | 0.19465800  | 3.58216800  | 2.04282100  |
| O  | 0  | 1.76740200  | 2.01555300  | 2.38731400  |
| O  | 0  | 4.28277700  | 0.29673100  | 2.52707000  |
| O  | 0  | 4.62095500  | 1.06631200  | 0.43506200  |
| C  | -1 | 1.73412600  | 1.97903700  | -1.98450300 |
| C  | -1 | 1.27470400  | 0.80532900  | -2.64833900 |
| C  | -1 | 1.64157600  | 0.57832100  | -3.98549000 |
| C  | -1 | 2.50053900  | 1.43654200  | -4.67029400 |
| C  | -1 | 2.98497500  | 2.56674100  | -3.98479800 |
| C  | -1 | 2.61246700  | 2.83668600  | -2.67957300 |
| C  | -1 | 0.44010000  | -0.22791500 | -1.99698800 |
| C  | -1 | -2.96988400 | 4.40873300  | 0.49940800  |

|   |    |             |             |             |
|---|----|-------------|-------------|-------------|
| C | -1 | -3.37822000 | 3.05207500  | 0.65386500  |
| C | -1 | -4.73750700 | 2.76153300  | 0.86101400  |
| C | -1 | -5.71727100 | 3.75433000  | 0.85650300  |
| C | -1 | -5.30515200 | 5.08228900  | 0.64075500  |
| C | -1 | -4.94523100 | -0.86331600 | -0.96679000 |
| C | -1 | -2.44930200 | 1.89860100  | 0.57485900  |
| C | -1 | 0.42064500  | -1.17819900 | 2.85542400  |
| C | -1 | 0.66792500  | -2.54542600 | 2.53631400  |
| C | -1 | 1.90612600  | -2.84369800 | 4.62937000  |
| C | -1 | 1.59619700  | -1.51082200 | 4.96261100  |
| C | -1 | 0.87267200  | -0.69730800 | 4.10515100  |
| C | -1 | 1.15860800  | 3.07572500  | 2.72854100  |
| C | 0  | 4.01282500  | 0.40704900  | 1.33371600  |
| C | 0  | 3.07978700  | -1.09452100 | -0.39384800 |
| C | 0  | 4.42554700  | -1.81137500 | -0.49121800 |
| C | 0  | 6.89496200  | -1.31490700 | -0.85468700 |
| C | 0  | 7.31463400  | -1.12779000 | 0.59437600  |
| H | -1 | 1.21519500  | -0.29298300 | -4.48286300 |
| H | -1 | 3.00429000  | 3.70466600  | -2.14956000 |
| H | -1 | -5.00540300 | 1.72033500  | 1.04212200  |
| H | -1 | -4.63386100 | 0.16770300  | -1.13573600 |
| H | -1 | 1.92396800  | -1.11782100 | 5.92635300  |
| H | -1 | 0.63417300  | 0.33242400  | 4.37277200  |
| H | 0  | 2.28346900  | -1.83237000 | -0.49954600 |
| H | 0  | 2.97788400  | -0.40729900 | -1.23673500 |
| H | 0  | 5.27170200  | 0.05064100  | -0.54263600 |
| H | 0  | 4.76057700  | -2.16870300 | 0.48525900  |
| H | 0  | 2.63889200  | -1.01316200 | 1.59873900  |
| H | 0  | 7.71075300  | 0.55803200  | -1.58232000 |
| H | 0  | 8.35651100  | -1.43710400 | 0.70447100  |
| H | 0  | 6.71880000  | -1.72712700 | 1.28712300  |
| H | 0  | 7.23170100  | -0.07684200 | 0.88714500  |
| N | 0  | 2.83294100  | -0.34517600 | 0.85383500  |
| N | 0  | 5.46742800  | -0.88823000 | -1.03236200 |
| H | 0  | 2.78293400  | 1.24230500  | -5.69927500 |
| H | -1 | 3.68493500  | 3.23261400  | -4.49284300 |
| H | -1 | -6.05971000 | 5.86975400  | 0.59573700  |
| O | -1 | 0.77772700  | 5.21882900  | -1.29988900 |
| H | 0  | 0.20704600  | 5.97438400  | -1.12134200 |
| C | -1 | -3.96824500 | 5.40644700  | 0.46701600  |
| H | 0  | 1.47689600  | 3.57111000  | 3.66012900  |
| H | -1 | -3.65686300 | 6.43756200  | 0.29809400  |
| H | 0  | 1.53281100  | -4.47623700 | 1.42388600  |
| H | 0  | -3.13483400 | -6.16602200 | -0.59633200 |

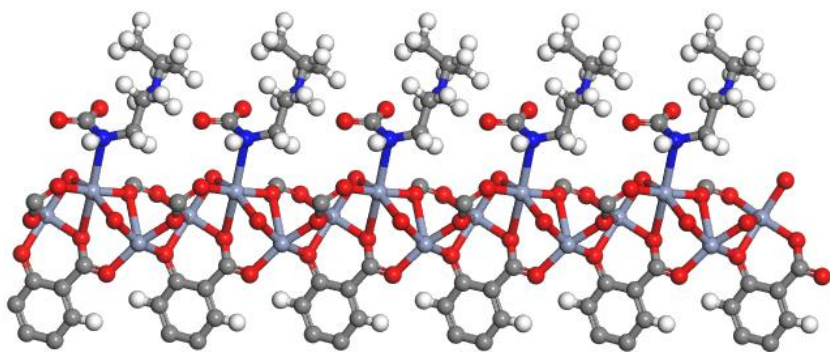

Cr-(D) Intermediate from VASP

```

1.0000000000000000
 21.6377820491506689    0.3262611606464768   -0.0089267542670677
-11.2112822710178026   18.8441244801566796   -0.0169435380899266
 -0.0108728490841769   -0.0132919975499849    6.5054200368208894

```

```

Cr  O  C  H  N
 6  20 48 32  2

```

Direct

```

0.3142164292033869  0.7461912559203913  0.8155732916793198
0.2500779161858142  0.6286617917015472  0.1532509515004200
0.3760326511440478  0.6836068674396770  0.4794239606674119
0.7026492417661335  0.3509247692898867  0.2599158771154831
0.5817331940598008  0.2860536885737797  0.9264616733203874
0.6365709824955423  0.4047472061499622  0.5934742736288610
0.4051001165593827  0.7752646697156891  0.6454761909367542
0.3687561626517333  0.7354221965633784  0.2308618163056267
0.3653868832136450  0.8184582833786174  0.0442088745629969
0.2212175494895758  0.6902401164503702  0.9791418514099434
0.2603506934501108  0.6910136027875083  0.5632857744533448
0.1752829285763789  0.6052685234648745  0.3770505200103795
0.3065250735270316  0.5916084353088957  0.3114613001116995
0.3053954430688934  0.6305495885448258  0.9000400998245868
0.3879290529592486  0.6259791517608061  0.7087941629896441
0.5467423503808247  0.7577151496968887  0.7149069258158981
0.5735772133272521  0.8294068938907178  0.4366204675679339
0.7297265397787226  0.4409340092535853  0.4325455681047724
0.6902594088220385  0.4018607974308232  0.8453314998587407
0.7761462441943590  0.4023323599100678  0.0339311281531316
0.6457415392288605  0.2588908517216814  0.0978896031095309
0.6456865505805807  0.2983715728629066  0.5105970240197727
0.5605877076372517  0.2139387867713167  0.6985722676292753
0.5451577483693097  0.3422975314003066  0.7645771600139961
0.5848421491088472  0.3422771821213710  0.1778216773543468
0.5849998818273490  0.4268315956991170  0.3666940424429734
0.4403496815394163  0.8404258741147255  0.5637699334666991
0.4306167091466270  0.8551468631761511  0.3567987882407777
0.4663035707629115  0.9250041007086700  0.2869724517123026

```

|                    |                    |                    |
|--------------------|--------------------|--------------------|
| 0.5140267778020529 | 0.9805047929581064 | 0.4113957203117281 |
| 0.5250396214059517 | 0.9647724720315003 | 0.6132374674790796 |
| 0.4891953992892381 | 0.8967479749559815 | 0.6882199369945389 |
| 0.3854890738207030 | 0.8001976234017948 | 0.2058902924000569 |
| 0.1550369900476498 | 0.6598122090212349 | 0.8962624482994258 |
| 0.1394675699572506 | 0.6336805299797007 | 0.6908119582566810 |
| 0.0683086984868403 | 0.5980180722673295 | 0.6227054888420296 |
| 0.0122862850999493 | 0.5901805253298672 | 0.7465813478304228 |
| 0.0289168306914722 | 0.6191384454275218 | 0.9458045321095894 |
| 0.0983457431033071 | 0.6530661681126358 | 0.0194899394643906 |
| 0.1946947744808713 | 0.6433761878196987 | 0.5391337748359896 |
| 0.3334698608051312 | 0.5536555625610762 | 0.2273112750447159 |
| 0.3573603746214745 | 0.5617635626817319 | 0.0198672589053875 |
| 0.3909378384512827 | 0.5248564824161309 | 0.9503721032485483 |
| 0.3988232803171059 | 0.4774706519402735 | 0.0749822331464720 |
| 0.3717112530645805 | 0.4673183488612903 | 0.2763360776802870 |
| 0.3397894265681849 | 0.5041210797991704 | 0.3510929001105009 |
| 0.3500802716150122 | 0.6088756211267961 | 0.8706842311818020 |
| 0.5452915808890714 | 0.7700583024089621 | 0.5249505650854290 |
| 0.5204285621232630 | 0.7055936151156842 | 0.1843748554797313 |
| 0.5990061507605241 | 0.7511054375902809 | 0.1217615009768417 |
| 0.7956819678907023 | 0.4775572937829464 | 0.5171242444605147 |
| 0.8114742572689324 | 0.4673199253182585 | 0.7227002624517772 |
| 0.8824898752374051 | 0.5037646836597595 | 0.7924921096772604 |
| 0.9379358843305275 | 0.5524908654402294 | 0.6699589528564370 |
| 0.9208325009418052 | 0.5642947126074809 | 0.4705682885496851 |
| 0.8516569064664710 | 0.5278950018779532 | 0.3952853103292697 |
| 0.7565770594320838 | 0.4209680196451674 | 0.8720448516570476 |
| 0.6171275743376713 | 0.1938769641909887 | 0.1821202764009887 |
| 0.5910096628041053 | 0.1786241524503759 | 0.3873727816266724 |
| 0.5569232905614585 | 0.1086843973048847 | 0.4567807490442361 |
| 0.5507978037095842 | 0.0536262623127984 | 0.3344277553509230 |
| 0.5800579279326556 | 0.0702020640798801 | 0.1356103972443647 |
| 0.6123181235612385 | 0.1383759859653432 | 0.0605049760304320 |
| 0.5989101609360280 | 0.2329917302019753 | 0.5369504818451505 |
| 0.5089493142131417 | 0.3718369282355745 | 0.8479485141815908 |
| 0.5198154800027928 | 0.3979310941037649 | 0.0533812315372419 |
| 0.4840679021775335 | 0.4328948667063516 | 0.1218841564497012 |
| 0.4352259753656443 | 0.4399884517235787 | 0.9985944104005940 |
| 0.4224092361830757 | 0.4107574685572901 | 0.7996091866232619 |
| 0.4582669624744937 | 0.3776676786313776 | 0.7253815630451210 |
| 0.5661016112440092 | 0.3890765725349151 | 0.2041018170662719 |
| 0.6842832126930207 | 0.8777302732484755 | 0.0042239047237084 |
| 0.6784460431137660 | 0.9397914885192589 | 0.9205456179368302 |
| 0.7339139904942417 | 0.8972983675109985 | 0.1898861207681336 |
| 0.4547153139244601 | 0.9347129458289281 | 0.1311693502908667 |

|                    |                    |                    |
|--------------------|--------------------|--------------------|
| 0.5635291516843780 | 0.0072546881740812 | 0.7113369697566003 |
| 0.4986326245454026 | 0.8848270782067248 | 0.8438115017238884 |
| 0.0579921932217475 | 0.5756648585810398 | 0.4682127123167936 |
| 0.9861261941372071 | 0.6153350288690725 | 0.0431949270781214 |
| 0.1108296813082117 | 0.6754736664706832 | 0.1739209146338177 |
| 0.4121014663425155 | 0.5354888034905403 | 0.7945304113191782 |
| 0.3753893225879900 | 0.4289569455638284 | 0.3745788872653610 |
| 0.3187720344058648 | 0.4957947119104457 | 0.5070022735304431 |
| 0.5021900263855017 | 0.6504354124830420 | 0.1463087048298479 |
| 0.6114017348605466 | 0.7278101942887690 | 0.9904024200722671 |
| 0.8932404758732949 | 0.4921090788550701 | 0.9469788166137065 |
| 0.9631511527479588 | 0.6035165750265483 | 0.3741422638767815 |
| 0.8389426624464135 | 0.5373861772343119 | 0.2405360221182544 |
| 0.5342978599662052 | 0.0984291353716292 | 0.6108845978586013 |
| 0.5775361316245835 | 0.0282854716050884 | 0.0389512978406791 |
| 0.6346815860239124 | 0.1505923546614592 | 0.9060396364968961 |
| 0.4963531650599757 | 0.4551899319773264 | 0.2764563147725861 |
| 0.3826755700305384 | 0.4136153771522536 | 0.7028120651505789 |
| 0.4478989454425615 | 0.3551275716817436 | 0.5710983403068765 |
| 0.4884008079936764 | 0.7206929789991133 | 0.0867464120147362 |
| 0.5791861469251712 | 0.8090692794785916 | 0.9185703841931026 |
| 0.5903897310116086 | 0.8364310443525728 | 0.1844936764316058 |
| 0.6345929629969527 | 0.7579275603098238 | 0.2507187216228038 |
| 0.4967778204424420 | 0.6649120857679255 | 0.4834295949955918 |
| 0.7024681184389312 | 0.8561056503819175 | 0.8799403385844838 |
| 0.6585274560670765 | 0.9612003546043117 | 0.0400199375794926 |
| 0.6424880141243580 | 0.9237379755544711 | 0.7868430662529931 |
| 0.7311121832428794 | 0.9819710573587823 | 0.8721951541872787 |
| 0.7863517927284003 | 0.9419838719674044 | 0.1510445436785535 |
| 0.7419816995938912 | 0.8538467738239376 | 0.2385995163384318 |
| 0.7121856314680609 | 0.9122812396890528 | 0.3211822863013500 |
| 0.5048288893579632 | 0.7079945374558991 | 0.4026519519372282 |
| 0.6102608371609272 | 0.8211867105986315 | 0.0563831360823613 |

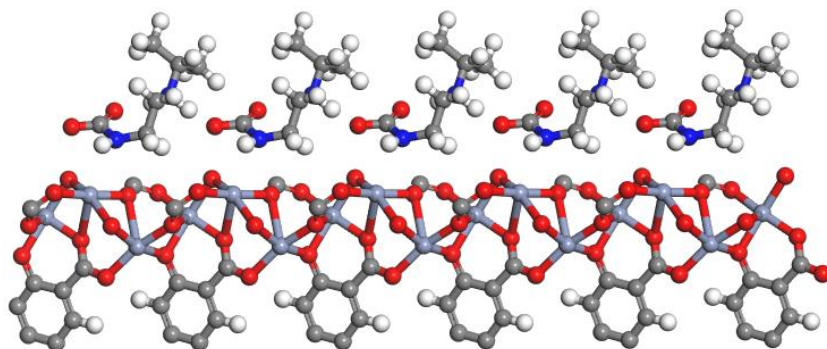

Cr-(E) TS<sub>2</sub>

|                      |                     |                    |
|----------------------|---------------------|--------------------|
| 1.000000000000000    |                     |                    |
| 21.5292155552562647  | 0.0000000000000000  | 0.0000000000000000 |
| -10.8670882296432776 | 18.9541993551855477 | 0.0000000000000000 |

-0.0159683635565323 0.0093599771078570 6.4865677627175540

Cr O C H N  
6 20 48 32 2

Direct

|                    |                    |                    |
|--------------------|--------------------|--------------------|
| 0.3161719745820978 | 0.7485221910052712 | 0.8072671010181394 |
| 0.2496555547651271 | 0.6307773853817193 | 0.1450765728157650 |
| 0.3756242733382459 | 0.6831618155411907 | 0.4715854462494380 |
| 0.7036312351707823 | 0.3536559228153685 | 0.2595540156436050 |
| 0.5822623909310809 | 0.2861130808459929 | 0.9259528789250633 |
| 0.6347956142763066 | 0.4052791153068672 | 0.5919622010202458 |
| 0.4072173660439815 | 0.7746221685439656 | 0.6380990882153307 |
| 0.3698154246147292 | 0.7361467197676862 | 0.2227503326891067 |
| 0.3690713818183080 | 0.8208714945575903 | 0.0350410232399574 |
| 0.2224517129069543 | 0.6943653993736442 | 0.9714116653651950 |
| 0.2613093747590943 | 0.6939601084292083 | 0.5549240391479432 |
| 0.1748726519184472 | 0.6088370776215111 | 0.3695450735770630 |
| 0.3050211775517734 | 0.5919587255963492 | 0.3042447332146539 |
| 0.3043720166950136 | 0.6310918477729242 | 0.8907475039826207 |
| 0.3865168285125575 | 0.6244347850418159 | 0.7001565592916006 |
| 0.5412840459675360 | 0.7520239361464558 | 0.5877917468907203 |
| 0.5743851729927946 | 0.8238606331935298 | 0.3047900798690527 |
| 0.7285885326924394 | 0.4436678578528336 | 0.4302781870215606 |
| 0.6896648106754011 | 0.4039773223370793 | 0.8444346928013723 |
| 0.7771789019964008 | 0.4066688303435307 | 0.0332088905845589 |
| 0.6487190935718392 | 0.2613554577375121 | 0.0971434523439562 |
| 0.6469770031196405 | 0.2997514710933453 | 0.5108714719215357 |
| 0.5623323343587917 | 0.2138448690982245 | 0.6990460675327953 |
| 0.5432461994327725 | 0.3405200331669955 | 0.7626076501095608 |
| 0.5836843312130094 | 0.3417672625506202 | 0.1772723315502754 |
| 0.5815820583561847 | 0.4256990768970300 | 0.3644331096831629 |
| 0.4436613146713605 | 0.8401444564708990 | 0.5563538658941907 |
| 0.4340783809869325 | 0.8559084693585582 | 0.3494282459376474 |
| 0.4702281220810278 | 0.9262163495388005 | 0.2810785284606075 |
| 0.5181318242496200 | 0.9812742780323569 | 0.4070239682834001 |
| 0.5291174147737023 | 0.9645183055085013 | 0.6083566764780881 |
| 0.4929941238628468 | 0.8958915444419234 | 0.6818802736796932 |
| 0.3882982992831330 | 0.8015542715959449 | 0.1974782935886721 |
| 0.1560174475900346 | 0.6650401470483210 | 0.8886590160405556 |
| 0.1399194817198133 | 0.6386904843558143 | 0.6832118814791708 |
| 0.0683883642725520 | 0.6037249976101087 | 0.6156780826737408 |
| 0.0125347618370098 | 0.5967776109090163 | 0.7403205090341007 |
| 0.0297675662954818 | 0.6262544075565301 | 0.9391314557867028 |
| 0.0995748202271675 | 0.6596015454636439 | 0.0121410117713154 |
| 0.1950058716224341 | 0.6471713111979841 | 0.5312723837769603 |
| 0.3300005854123420 | 0.5520406845698831 | 0.2201531731864038 |
| 0.3536391323897733 | 0.5594364707952426 | 0.0119648324468996 |



|                    |                    |                    |
|--------------------|--------------------|--------------------|
| 0.3857360674577722 | 0.5208508538310176 | 0.9427353198378546 |
| 0.3924073235675171 | 0.4726521160628088 | 0.0688315631647443 |
| 0.3649977579324878 | 0.4628711557208883 | 0.2705511718726221 |
| 0.3343577740135414 | 0.5011871412143120 | 0.3447850722463190 |
| 0.3480621016372989 | 0.6077882771183847 | 0.8618922563149130 |
| 0.5456891609243959 | 0.7641487735532896 | 0.3938759757293821 |
| 0.5268641876313021 | 0.7018180122760728 | 0.0534814736833931 |
| 0.6050660977975566 | 0.7499665703957891 | 0.9861126205987416 |
| 0.7947597637482409 | 0.4816571694697600 | 0.5142949059163719 |
| 0.8112263699738389 | 0.4718801255510454 | 0.7203918289884506 |
| 0.8825808011063795 | 0.5094332530259484 | 0.7893918904682500 |
| 0.9376796401360327 | 0.5587772334241060 | 0.6653004046749956 |
| 0.9198220460701915 | 0.5703250630521745 | 0.4656714299370288 |
| 0.8502888251617839 | 0.5329104583461698 | 0.3912896131496298 |
| 0.7566547842531997 | 0.4246126011430056 | 0.8708030086063536 |
| 0.6208016156062209 | 0.1960469597507865 | 0.1812903960502239 |
| 0.5940679444857011 | 0.1799403091376490 | 0.3866620776917142 |
| 0.5602560144925447 | 0.1095472441238908 | 0.4552063756916205 |
| 0.5550734337505107 | 0.0549929106895588 | 0.3318150420892716 |
| 0.5852967021557769 | 0.0725155328022285 | 0.1333590754736878 |
| 0.6172916980188238 | 0.1411159473302266 | 0.0590951618819210 |
| 0.6008998304886094 | 0.2338333292035386 | 0.5369419722981980 |
| 0.5054122689034496 | 0.3686838024671968 | 0.8455704722375744 |
| 0.5158447963036112 | 0.3949883551643102 | 0.0509811448622726 |
| 0.4787197921829788 | 0.4289565539462191 | 0.1186086815462228 |
| 0.4290337018536118 | 0.4348879227397821 | 0.9942535749640771 |
| 0.4164505330793895 | 0.4051704610196077 | 0.7957051845339039 |
| 0.4535440128556407 | 0.3729152533664490 | 0.7224389518775991 |
| 0.5632971169237143 | 0.3876115381379887 | 0.2023877156621306 |
| 0.6858910063242337 | 0.8750403751854661 | 0.8500919703333883 |
| 0.6773101009996489 | 0.9317820251924859 | 0.7368052155426925 |
| 0.7366595462173148 | 0.9039339743281427 | 0.0340465637644497 |
| 0.4588526093921299 | 0.9367116923710250 | 0.1252145597805028 |
| 0.5676496201995168 | 0.0066515499088566 | 0.7076649284603761 |
| 0.5019573999629690 | 0.8833477218609346 | 0.8380275335201992 |
| 0.0576347491448362 | 0.5810291385513213 | 0.4613746941692275 |
| 0.9871696062632991 | 0.6232107014619941 | 0.0370958535116269 |
| 0.1124786946392541 | 0.6823204096736004 | 0.1663905025280556 |
| 0.4070980295535453 | 0.5311562075176707 | 0.7863947004953431 |
| 0.3676607699279498 | 0.4238321634681066 | 0.3697773884515373 |
| 0.3132697370345731 | 0.4933186019824772 | 0.5011648831252716 |
| 0.5103432460134351 | 0.6471790295285615 | 0.0124720470614679 |
| 0.6184788255821290 | 0.7269879386270502 | 0.8555923669793043 |
| 0.8938883792226775 | 0.4979829217593974 | 0.9442085394191863 |
| 0.9618006742202694 | 0.6100253446774121 | 0.3679865346426303 |
| 0.8370234190110583 | 0.5421507241173031 | 0.2362228844799648 |

|                    |                    |                    |
|--------------------|--------------------|--------------------|
| 0.5369820708158537 | 0.0985224119079466 | 0.6092234907176252 |
| 0.5836959280031958 | 0.0309900438023710 | 0.0364197964484770 |
| 0.6403276025752609 | 0.1541051886762952 | 0.9048159902713205 |
| 0.4907688462919025 | 0.4516412944147276 | 0.2729549626280125 |
| 0.3761002744139511 | 0.4071564929175592 | 0.6982120789951931 |
| 0.4434383986312818 | 0.3500494307849016 | 0.5683783474118195 |
| 0.4927761766577753 | 0.7158448291119283 | 0.9602478848609092 |
| 0.5789902481264873 | 0.8037883009878711 | 0.7809423287339580 |
| 0.5937382917545192 | 0.8342426308588071 | 0.0434376784850721 |
| 0.6420858864145099 | 0.7593722288424301 | 0.1140871999617804 |
| 0.5036280812824437 | 0.6587883041717100 | 0.3531804134593917 |
| 0.7049718290356437 | 0.8496260976348837 | 0.7399664174682090 |
| 0.6578944503166039 | 0.9578683133347161 | 0.8426427660664024 |
| 0.6396500940886374 | 0.9091209861662248 | 0.6071569375474091 |
| 0.7292787365194853 | 0.9722270794701954 | 0.6757975617548816 |
| 0.7890744291844879 | 0.9463800288904869 | 0.9822581603049918 |
| 0.7449021224755367 | 0.8634691182796563 | 0.1092494197770211 |
| 0.7156619105684850 | 0.9256267334361373 | 0.1501089414379574 |
| 0.5127304278537304 | 0.7024261776454763 | 0.2728452040544170 |
| 0.6128704185690106 | 0.8185188428367887 | 0.9152799072253405 |

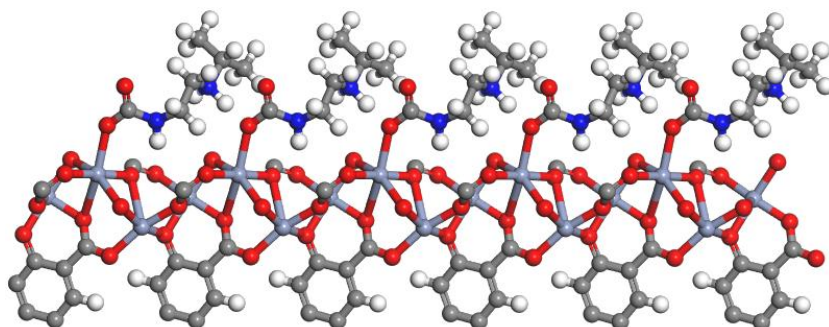

Cr-(F) Product

1.00000000000000

|                      |                     |                     |
|----------------------|---------------------|---------------------|
| 21.0895918014481722  | 0.0696488734609690  | 0.1210870809443572  |
| -11.2893155094750988 | 18.9446565926070285 | -0.0036802821861054 |
| -0.0567221713168777  | -0.0101138211545094 | 6.5143140713266066  |

| Cr | O  | C  | H  | N |
|----|----|----|----|---|
| 6  | 20 | 48 | 32 | 2 |

Direct

|                    |                    |                    |
|--------------------|--------------------|--------------------|
| 0.3275980293705345 | 0.7546232254576637 | 0.7945068911219693 |
| 0.2546314548939961 | 0.6384839339070680 | 0.1338135298091743 |
| 0.3889031241606631 | 0.6871653838087113 | 0.4531346437085659 |
| 0.7018340669862582 | 0.3577089808180460 | 0.2528885900878706 |
| 0.5776221334537865 | 0.2843457220341534 | 0.9189012081786672 |
| 0.6269140003734961 | 0.4025125817063469 | 0.5860961799029596 |
| 0.4217516482717727 | 0.7798051127468781 | 0.6286626372866237 |
| 0.3825248317527752 | 0.7409879534619535 | 0.2080221119387602 |
| 0.3838552087005596 | 0.8262605989019534 | 0.0235052346966498 |
| 0.2313168429696120 | 0.7041855842019018 | 0.9586366500884012 |

|                    |                    |                    |
|--------------------|--------------------|--------------------|
| 0.2703944500628168 | 0.7035386609508834 | 0.5410412208312394 |
| 0.1793200452696553 | 0.6195906849467647 | 0.3575465435073042 |
| 0.3075604860494394 | 0.5967947682416579 | 0.2910017315361131 |
| 0.3085991907056567 | 0.6364462501411552 | 0.8788695575129637 |
| 0.3909684357101355 | 0.6269985589102092 | 0.6904457379914746 |
| 0.5123428042479006 | 0.7307340485175189 | 0.3870910451722267 |
| 0.6136049599757456 | 0.7311795682667963 | 0.2698190926674897 |
| 0.7236378314826766 | 0.4455687930772783 | 0.4249976509528466 |
| 0.6844362357432203 | 0.4046216826358346 | 0.8378153043468330 |
| 0.7764262793540126 | 0.4134183901315396 | 0.0272366811683469 |
| 0.6489214651214681 | 0.2647933876334889 | 0.0917651559541284 |
| 0.6456988588263499 | 0.3019176550762168 | 0.5040995050806742 |
| 0.5615442760627474 | 0.2135245602523952 | 0.6925658268342687 |
| 0.5336160683908986 | 0.3342042944436230 | 0.7560300759418297 |
| 0.5761307567301088 | 0.3374540855694335 | 0.1696326972239532 |
| 0.5707889539270923 | 0.4185720081110560 | 0.3575424112156185 |
| 0.4572113102734079 | 0.8451415007875838 | 0.5479234978336578 |
| 0.4483062548127279 | 0.8604552362568256 | 0.3402248433183459 |
| 0.4833309549594986 | 0.9309186540466428 | 0.2746581247236932 |
| 0.5294214927756116 | 0.9870602280682306 | 0.4024535500534796 |
| 0.5399336543019402 | 0.9711658761707724 | 0.6044905945291248 |
| 0.5052093661975263 | 0.9022846497495323 | 0.6753633958799625 |
| 0.4022067624402155 | 0.8062106698848908 | 0.1855286254444479 |
| 0.1630095957982078 | 0.6756811262220523 | 0.8763558558222826 |
| 0.1458442613933428 | 0.6496654930679142 | 0.6716379412061002 |
| 0.0721227127680351 | 0.6148966251414336 | 0.6056603864680952 |
| 0.0152520141385111 | 0.6077447060072885 | 0.7311141404380948 |
| 0.0336760127623066 | 0.6372823697127288 | 0.9288916992353862 |
| 0.1056559115333329 | 0.6705605275049535 | 0.0002617214676164 |
| 0.2016319701614506 | 0.6576749167528106 | 0.5188840278106284 |
| 0.3284502577444997 | 0.5540083220806267 | 0.2058567509116145 |
| 0.3525862342196291 | 0.5606131537237857 | 0.9983261640108623 |
| 0.3815751105411209 | 0.5193863152530085 | 0.9287740057608005 |
| 0.3841110290254193 | 0.4692483056538350 | 0.0537199364537884 |
| 0.3556580247935344 | 0.4601413120108830 | 0.2540143791378355 |
| 0.3283166915897198 | 0.5011018208873423 | 0.3287171646483742 |
| 0.3505273710935839 | 0.6106141974384300 | 0.8500719676460591 |
| 0.5526602869060966 | 0.7264550868939210 | 0.2408943526515941 |
| 0.5539373251401116 | 0.6965597452071037 | 0.8765980805262501 |
| 0.6251257904050647 | 0.7557285502039264 | 0.7855053467273478 |
| 0.7913643228029770 | 0.4861887679792787 | 0.5088237334961576 |
| 0.8090095967667210 | 0.4778189235756187 | 0.7143746791052408 |
| 0.8823352569270710 | 0.5180374711812661 | 0.7825603152295315 |
| 0.9380898069440349 | 0.5683883099189160 | 0.6580793649337338 |
| 0.9188696726331358 | 0.5786867259991837 | 0.4593324560111967 |
| 0.8474111170172520 | 0.5388057180773274 | 0.3859116672485143 |

|                    |                    |                    |
|--------------------|--------------------|--------------------|
| 0.7539384928464443 | 0.4290655488523569 | 0.8646017519468785 |
| 0.6239643298401347 | 0.2004227585367531 | 0.1763429508183165 |
| 0.5970936033461101 | 0.1831198005649881 | 0.3813999184743793 |
| 0.5661300330548045 | 0.1132560138760539 | 0.4503497153396978 |
| 0.5641487486398589 | 0.0605315561397717 | 0.3278823183038782 |
| 0.5947895620965724 | 0.0794476126309362 | 0.1299200726698828 |
| 0.6238478882647414 | 0.1474304602754088 | 0.0551801524604443 |
| 0.6009994595210486 | 0.2354355464727362 | 0.5309486857078412 |
| 0.4949951787027231 | 0.3620791751131023 | 0.8378616779860835 |
| 0.5055277012459527 | 0.3883186061911346 | 0.0422663142552722 |
| 0.4685589684119691 | 0.4228425990275397 | 0.1072469869159249 |
| 0.4189629575052294 | 0.4295814503176416 | 0.9812115441648785 |
| 0.4057695665487273 | 0.3996213567016582 | 0.7839700600360615 |
| 0.4426131152260595 | 0.3665944822508180 | 0.7135302320827535 |
| 0.5536659242283335 | 0.3814963804625648 | 0.1947280255603161 |
| 0.6779189977931495 | 0.8656085223741812 | 0.5671626105540142 |
| 0.6549872405403079 | 0.9014644617451069 | 0.4068955374393468 |
| 0.7300137375289708 | 0.9176375273746444 | 0.7273902290465628 |
| 0.4717479762247052 | 0.9407661561368243 | 0.1189060149705341 |
| 0.5766755917419317 | 0.0140315308348704 | 0.7065947966634241 |
| 0.5130152305945757 | 0.8906668310308774 | 0.8332815996789691 |
| 0.0603793210163204 | 0.5921932930817349 | 0.4521075406278001 |
| 0.9903400283561723 | 0.6341582066056688 | 0.0274518320149966 |
| 0.1195395395353458 | 0.6931190642755496 | 0.1539352967137688 |
| 0.4038480573946899 | 0.5290059837790793 | 0.7735120509044080 |
| 0.3552390382629227 | 0.4197529553602948 | 0.3522498635525011 |
| 0.3067546198603068 | 0.4939648294054066 | 0.4843834269997416 |
| 0.5650969056499591 | 0.6556955047396897 | 0.9324549444305035 |
| 0.6472727195705872 | 0.7340865343699150 | 0.6740866137268497 |
| 0.8947745709460335 | 0.5076639352729586 | 0.9367526868770923 |
| 0.9612917991071797 | 0.6192170327168256 | 0.3615036275643675 |
| 0.8329867060977563 | 0.5469743016096018 | 0.2315695574399257 |
| 0.5422829810720629 | 0.1011104637709366 | 0.6038422807922785 |
| 0.5959384025079331 | 0.0395666589595933 | 0.0337369341018956 |
| 0.6472319980540107 | 0.1615559343664046 | 0.9013568483679109 |
| 0.4812075462436098 | 0.4459060607283050 | 0.2603323170739102 |
| 0.3654531916071093 | 0.4022959098297463 | 0.6847736698584228 |
| 0.4323790389019848 | 0.3439076010034015 | 0.5600391032648631 |
| 0.5115233916696411 | 0.6733750420957207 | 0.7561929865993875 |
| 0.5688816777465320 | 0.7742746640019362 | 0.5502332765843718 |
| 0.5867187229321971 | 0.8253954994355936 | 0.7643021884783892 |
| 0.6655284619409869 | 0.7840380478787381 | 0.9071219139690427 |
| 0.4733840718673719 | 0.7109767022691358 | 0.0290640335286128 |
| 0.7033460167831223 | 0.8393023215557704 | 0.4881256842309369 |
| 0.6301436320343683 | 0.9294563544629426 | 0.4784785405214436 |
| 0.6153945897740201 | 0.8634589406314319 | 0.2967633964343790 |

|                    |                    |                    |
|--------------------|--------------------|--------------------|
| 0.7040271883268332 | 0.9402104424488797 | 0.3217230274723022 |
| 0.7784879829367952 | 0.9604874182220513 | 0.6505590289406413 |
| 0.7495364185156888 | 0.8932833381393976 | 0.8385200006970805 |
| 0.7030179257189531 | 0.9415519535417829 | 0.8121245431990900 |
| 0.5253021309473596 | 0.7198023839127927 | 0.0423319070307286 |
| 0.6107545182603786 | 0.8059123282101197 | 0.6681329834401595 |

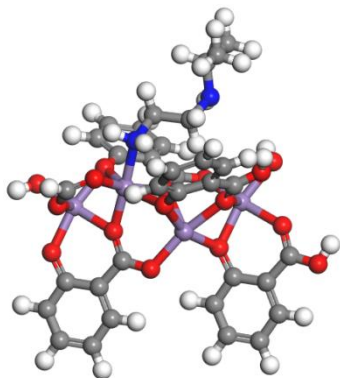

Mn-(A) i-2-MOF

-1 1

|    |             |             |             |
|----|-------------|-------------|-------------|
| H  | -0.58475900 | 7.89263700  | -0.73943900 |
| H  | 1.46258000  | 6.47741200  | -1.07696500 |
| Mn | -2.49606400 | 1.35846400  | -1.51827000 |
| O  | -4.37605000 | 0.49626700  | -1.98314400 |
| O  | -0.88576900 | 2.62561200  | -1.03338500 |
| O  | -3.69209200 | 3.00603200  | -0.94515800 |
| O  | -4.36984500 | 5.08031700  | -0.50354300 |
| O  | -2.31377600 | 0.98064400  | 0.63214200  |
| O  | -4.37414400 | 0.59384200  | 1.39382700  |
| H  | -4.20650800 | -0.08124400 | -2.73708400 |
| C  | -0.86725700 | 3.96830100  | -0.98284000 |
| C  | -2.03710600 | 4.77655800  | -0.83560800 |
| C  | -1.89605800 | 6.17292400  | -0.74456100 |
| C  | -0.66151200 | 6.81400900  | -0.81383500 |
| C  | 0.48103800  | 6.00596700  | -0.98976400 |
| C  | 0.38247400  | 4.62710000  | -1.07370200 |
| C  | -3.42634000 | 4.25226400  | -0.74907400 |
| C  | -2.56373100 | 0.00543900  | 2.81730300  |
| C  | -3.49281300 | -0.36588300 | 3.80401200  |
| C  | -3.11627600 | 0.56337100  | 1.55877100  |
| H  | -3.85551800 | -1.25918900 | 5.73970700  |
| C  | -4.04064900 | -4.43391400 | -0.60754100 |
| C  | -4.81841300 | -4.53371100 | 0.69906200  |
| C  | -4.94301600 | -4.72729600 | -1.79887700 |
| H  | -2.80627900 | 6.75068300  | -0.58294700 |
| H  | -4.54625100 | -0.19862000 | 3.57756700  |
| H  | -3.09158800 | -3.02064200 | -1.71321900 |
| H  | -3.25161700 | -5.20750500 | -0.58973100 |

|    |             |             |             |
|----|-------------|-------------|-------------|
| H  | -5.60615200 | -3.77289900 | 0.72947100  |
| H  | -4.17697800 | -4.39657900 | 1.57497400  |
| H  | -5.28462600 | -5.51973800 | 0.78626500  |
| H  | -5.76472500 | -4.00421400 | -1.84173400 |
| H  | -5.36807200 | -5.73255700 | -1.72567800 |
| H  | -4.38675900 | -4.66657600 | -2.74108000 |
| N  | -3.48646700 | -3.08869600 | -0.77898800 |
| H  | 5.53660600  | 4.90973100  | 0.50522700  |
| H  | 7.58250000  | 3.49372300  | 0.17022800  |
| Mn | 3.62385600  | -1.62522400 | -0.27107700 |
| Mn | -0.17623500 | 1.35343200  | 0.52826200  |
| Mn | 1.15699900  | -1.38818400 | 0.68818900  |
| O  | 1.81657100  | -2.46080900 | -0.77981900 |
| O  | -0.07034500 | -0.43884300 | -0.69634700 |
| O  | -1.38449000 | -0.14131500 | -2.51164600 |
| O  | 5.23415200  | -0.35807600 | 0.21380800  |
| O  | 2.50432500  | 0.01470700  | 0.25914800  |
| O  | 1.74998700  | 2.09667200  | 0.74363300  |
| O  | -0.23883200 | -0.01420600 | 2.10002700  |
| O  | 3.80614500  | -2.00304400 | 1.87933500  |
| O  | 1.75967000  | -2.30533100 | 2.66459000  |
| C  | 1.29249700  | -2.65439000 | -1.98795300 |
| C  | 0.23236400  | -1.88894900 | -2.57143600 |
| C  | -0.14324000 | -2.13264100 | -3.90427000 |
| C  | 0.45646400  | -3.10941600 | -4.69498500 |
| C  | 1.48616500  | -3.87223400 | -4.10408600 |
| C  | 1.89106600  | -3.65193700 | -2.79838300 |
| C  | -0.48338500 | -0.78637600 | -1.88212400 |
| C  | 5.25266400  | 0.98461200  | 0.26435300  |
| C  | 4.08281400  | 1.79287000  | 0.41158500  |
| C  | 4.22377400  | 3.18927900  | 0.50261500  |
| C  | 5.45840900  | 3.83032200  | 0.43335800  |
| C  | 6.60095900  | 3.02227800  | 0.25743000  |
| C  | 6.50239400  | 1.64341200  | 0.17349100  |
| C  | 2.69358100  | 1.26857600  | 0.49812000  |
| C  | -1.17551200 | -0.27777100 | 3.01612400  |
| H  | 3.42801400  | -2.83524000 | 3.73096900  |
| C  | -3.11802600 | -0.97703300 | 4.99774200  |
| C  | -1.73855200 | -1.19951000 | 5.20661400  |
| C  | -0.79682400 | -0.86093800 | 4.25044000  |
| C  | 3.00364500  | -2.42031700 | 2.80596400  |
| C  | -1.21294000 | -3.50596200 | 0.23080500  |
| C  | -2.48019100 | -2.65464000 | 0.17676600  |
| H  | -0.64639600 | -2.67251300 | 2.00635500  |
| H  | -0.91665700 | -1.48745800 | -4.32146100 |
| H  | 2.70639300  | -4.23539400 | -2.36535200 |

|   |             |             |             |
|---|-------------|-------------|-------------|
| H | 3.31364200  | 3.76699500  | 0.66424600  |
| H | 1.27189600  | 4.00937800  | -1.20944100 |
| H | -1.40646000 | -1.64101700 | 6.14879800  |
| H | 0.26672400  | -1.04282100 | 4.41616500  |
| H | -0.78447700 | -3.59601800 | -0.77131600 |
| H | -1.46432600 | -4.51900500 | 0.56834400  |
| H | -2.20929200 | -1.62393200 | -0.07253500 |
| H | -2.93018000 | -2.61846100 | 1.17753300  |
| H | 0.45492300  | -3.65314200 | 1.38904100  |
| N | -0.19746000 | -2.91930900 | 1.12421000  |
| H | 0.15125100  | -3.26784800 | -5.72324300 |
| H | 1.96763100  | -4.66253900 | -4.68435800 |
| O | 4.73543100  | -3.12500400 | -1.26445300 |
| H | 5.51929900  | -3.28505200 | -0.72727000 |
| H | 7.39181700  | 1.02569000  | 0.03775200  |
| H | -4.85725900 | 0.10344000  | 2.06942000  |
| H | -5.21308500 | 4.59842700  | -0.50856400 |

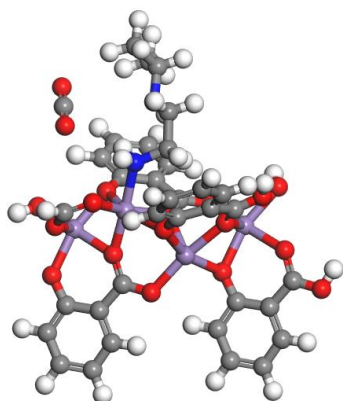

#### Mn-(B) Complex

-1 1

|    |    |             |             |             |
|----|----|-------------|-------------|-------------|
| H  | 0  | -8.19833200 | 1.38938000  | -1.15786700 |
| Mn | -1 | -2.35115200 | -2.17444200 | -1.60611600 |
| O  | -1 | -2.08135200 | -4.20847800 | -2.00308400 |
| O  | -1 | -3.19408600 | -0.29576000 | -1.14957400 |
| O  | -1 | -4.28396900 | -2.87983300 | -0.99174800 |
| O  | -1 | -6.50114600 | -3.00324800 | -0.77871000 |
| O  | -1 | -1.97015200 | -2.08953300 | 0.55042900  |
| O  | -1 | -2.28723200 | -4.13472700 | 1.38765100  |
| H  | 0  | -1.49812100 | -4.27123900 | -2.76893900 |
| C  | -1 | -4.48368800 | 0.07877300  | -1.16889200 |
| C  | -1 | -5.57738400 | -0.83385000 | -1.05985800 |
| C  | -1 | -6.88951800 | -0.32879000 | -1.05330600 |
| C  | -1 | -7.17594900 | 1.02934300  | -1.16813500 |
| C  | -1 | -6.08682500 | 1.91549400  | -1.30241800 |
| C  | -1 | -5.43839400 | -2.30880200 | -0.92943400 |
| C  | -1 | -1.36044300 | -3.44423400 | 3.87166700  |
| C  | -1 | -1.90688300 | -2.93080600 | 1.52859400  |

|    |    |             |             |             |
|----|----|-------------|-------------|-------------|
| H  | 0  | -0.79536800 | -3.95667300 | 5.89560900  |
| C  | 0  | 5.32015100  | -3.60041200 | -2.17060600 |
| H  | -1 | -7.69563200 | -1.05046000 | -0.92121500 |
| H  | -1 | -1.79230700 | -4.41985600 | 3.64533600  |
| H  | 0  | 2.49496400  | -4.39765600 | 0.59240600  |
| H  | 0  | 3.15275500  | -2.84603400 | -1.20353500 |
| H  | 0  | 4.31253100  | -4.98140900 | -0.87790400 |
| H  | 0  | 4.52294000  | -3.57005500 | -2.92174600 |
| H  | 0  | 6.06746300  | -4.32667900 | -2.50297500 |
| H  | 0  | -3.72712200 | 6.53581900  | 0.22318000  |
| H  | -1 | -6.27776900 | 2.98404500  | -1.42474900 |
| Mn | -1 | 2.12023600  | 2.97150400  | -0.22210800 |
| Mn | -1 | -1.83763500 | 0.08248400  | 0.43807600  |
| Mn | 0  | 1.16574300  | 0.66783300  | 0.76945000  |
| O  | 0  | 2.40448500  | 1.01839500  | -0.67306100 |
| O  | 0  | -0.02001600 | -0.27258500 | -0.67628200 |
| O  | -1 | -0.58166300 | -1.47632800 | -2.50523200 |
| O  | -1 | 1.27754200  | 4.84921700  | 0.23504300  |
| O  | 0  | 0.21049200  | 2.33443400  | 0.31467700  |
| O  | -1 | -2.02960000 | 2.14161400  | 0.60570700  |
| O  | 0  | -0.63821700 | -0.28906100 | 2.10173600  |
| O  | -1 | 2.50170300  | 3.05527500  | 1.93504900  |
| O  | 0  | 2.07514200  | 1.05799700  | 2.78581800  |
| O  | 0  | 5.35517200  | 0.17068600  | 1.02167300  |
| O  | 0  | 6.79613500  | -0.44788100 | -0.70198900 |
| C  | -1 | 2.54588900  | 0.38048200  | -1.82771400 |
| C  | -1 | 1.56845600  | -0.45924900 | -2.44596700 |
| C  | -1 | 1.82689700  | -1.00140800 | -3.71604800 |
| C  | -1 | 3.01522700  | -0.77125800 | -4.40329300 |
| C  | -1 | 3.97584200  | 0.05409900  | -3.77847800 |
| C  | -1 | 3.74815200  | 0.61516000  | -2.53517600 |
| C  | -1 | 0.26281900  | -0.79475400 | -1.83756000 |
| C  | -1 | -0.01207200 | 5.22384600  | 0.21542400  |
| C  | -1 | -1.10567000 | 4.31123900  | 0.32455900  |
| C  | -1 | -2.41780400 | 4.81629800  | 0.33111000  |
| C  | -1 | -2.70443300 | 6.17440300  | 0.21628100  |
| C  | -1 | -1.61530800 | 7.06055300  | 0.08199800  |
| C  | -1 | -4.78095700 | 1.45574600  | -1.30434900 |
| C  | -1 | -0.96687800 | 2.83625700  | 0.45498100  |
| C  | -1 | -0.72410400 | -1.22479600 | 3.04749200  |
| C  | -1 | -1.35639800 | -2.49395100 | 2.83698300  |
| C  | -1 | -0.78653500 | -3.20258800 | 5.11755800  |
| C  | -1 | -0.20638200 | -1.93157900 | 5.32791300  |
| C  | -1 | -0.17835000 | -0.97307600 | 4.32957400  |
| C  | -1 | 2.56503600  | 2.21219500  | 2.91362700  |
| C  | 0  | 6.07102100  | -0.14268300 | 0.15716500  |



|   |    |             |             |             |
|---|----|-------------|-------------|-------------|
| C | 0  | 1.81041700  | -2.38842800 | 0.92294100  |
| C | 0  | 2.93550300  | -3.39273300 | 0.72232700  |
| C | 0  | 4.77470500  | -3.97860400 | -0.80026700 |
| C | 0  | 5.89766700  | -4.06430900 | 0.22637800  |
| H | -1 | 1.03464700  | -1.59748100 | -4.17008100 |
| H | -1 | 4.49866100  | 1.24879200  | -2.05896500 |
| H | -1 | -3.22390400 | 4.09453000  | 0.46320300  |
| H | -1 | -3.94225400 | 2.14598000  | -1.41053600 |
| H | -1 | 0.22289500  | -1.69793900 | 6.30462100  |
| H | -1 | 0.27730200  | 0.00528000  | 4.49708300  |
| H | 0  | 1.20042300  | -2.67476300 | 1.78235100  |
| H | 0  | 1.15122100  | -2.39622100 | 0.04949500  |
| H | 0  | 3.13652700  | -0.92620500 | 0.53392100  |
| H | 0  | 3.55354300  | -3.43085100 | 1.62761600  |
| H | 0  | 2.64778700  | -0.92507400 | 2.07572500  |
| H | 0  | 5.78980100  | -2.61215800 | -2.13293000 |
| N | 0  | 2.30573000  | -1.01668400 | 1.12080600  |
| N | 0  | 3.76743100  | -2.99004000 | -0.40407800 |
| H | 0  | 3.18958900  | -1.19685400 | -5.38517100 |
| H | -1 | 4.92844300  | 0.23804300  | -4.28037400 |
| H | -1 | -1.80615500 | 8.12912000  | -0.04023400 |
| O | -1 | 3.88979400  | 3.66912600  | -1.12082000 |
| H | 0  | 4.20935700  | 4.37089900  | -0.54303300 |
| C | -1 | -0.30934200 | 6.60081900  | 0.08006700  |
| H | 0  | 3.02008600  | 2.52748700  | 3.86276600  |
| H | -1 | 0.52937600  | 7.29095500  | -0.02612000 |
| H | 0  | -2.03731000 | -4.69789900 | 2.12967700  |
| H | 0  | -6.25350100 | -3.94129500 | -0.73382800 |
| H | 0  | 6.41680700  | -3.10366400 | 0.30675300  |
| H | 0  | 6.62704200  | -4.82150400 | -0.07719800 |
| H | 0  | 5.53064300  | -4.34063300 | 1.21893300  |

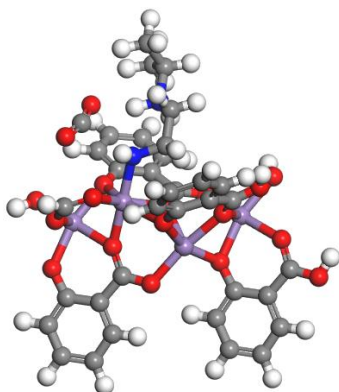

Mn-(C) TS<sub>1</sub>

|    |    |             |             |             |
|----|----|-------------|-------------|-------------|
| -1 | 1  |             |             |             |
| H  | 0  | -8.05616100 | 1.66252000  | -1.18261600 |
| Mn | -1 | -2.34577500 | -2.12813500 | -1.52094400 |
| O  | -1 | -2.15250400 | -4.18319200 | -1.84864300 |

|    |    |             |             |             |
|----|----|-------------|-------------|-------------|
| O  | -1 | -3.11734300 | -0.20520900 | -1.12728100 |
| O  | -1 | -4.30119000 | -2.74024000 | -0.87868700 |
| O  | -1 | -6.52066300 | -2.77440700 | -0.65690500 |
| O  | -1 | -1.95461400 | -1.98386200 | 0.63063600  |
| O  | -1 | -2.34409300 | -3.98614700 | 1.53795000  |
| H  | 0  | -1.57126300 | -4.29516100 | -2.61032100 |
| C  | -1 | -4.39233600 | 0.21595000  | -1.15660800 |
| C  | -1 | -5.51850000 | -0.65139600 | -1.01410900 |
| C  | -1 | -6.81106300 | -0.09823300 | -1.02211400 |
| C  | -1 | -7.04775500 | 1.26485600  | -1.18273700 |
| C  | -1 | -5.92714800 | 2.10505900  | -1.34956800 |
| C  | -1 | -5.43356700 | -2.12517200 | -0.83361100 |
| C  | -1 | -1.38406000 | -3.24610800 | 3.99500000  |
| C  | -1 | -1.91914200 | -2.79308900 | 1.63686700  |
| H  | 0  | -0.83259800 | -3.70940800 | 6.03448600  |
| C  | 0  | 4.72973600  | -3.78191900 | -2.54102200 |
| H  | -1 | -7.64278500 | -0.78479700 | -0.86368800 |
| H  | -1 | -1.85242600 | -4.21214200 | 3.80304500  |
| H  | 0  | 2.07814600  | -4.42286300 | 0.52901800  |
| H  | 0  | 2.59219200  | -2.94425300 | -1.33933700 |
| H  | 0  | 3.54785700  | -5.12147600 | -1.33890600 |
| H  | 0  | 3.92235800  | -3.52209100 | -3.23170000 |
| H  | 0  | 5.32026900  | -4.58228300 | -2.99279200 |
| H  | 0  | -3.39350900 | 6.68468100  | 0.01255800  |
| H  | -1 | -6.07895300 | 3.17511600  | -1.50789200 |
| Mn | -1 | 2.31691900  | 2.89320200  | -0.32323200 |
| Mn | -1 | -1.74248000 | 0.17665000  | 0.44378100  |
| Mn | 0  | 1.34688000  | 0.64719000  | 0.74989300  |
| O  | 0  | 2.52667700  | 0.93465900  | -0.73196900 |
| O  | 0  | 0.05990800  | -0.27342600 | -0.66860400 |
| O  | -1 | -0.55483600 | -1.52701600 | -2.44713100 |
| O  | -1 | 1.54550500  | 4.81536900  | 0.07114200  |
| O  | 0  | 0.38462100  | 2.33998900  | 0.25523400  |
| O  | -1 | -1.85791300 | 2.24602100  | 0.54120900  |
| O  | 0  | -0.58369500 | -0.17309400 | 2.13181500  |
| O  | -1 | 2.70842500  | 3.03643100  | 1.82893600  |
| O  | 0  | 2.17480600  | 1.10751000  | 2.77605100  |
| O  | 0  | 4.83663300  | 0.28849700  | 1.78289300  |
| O  | 0  | 5.15962300  | -1.12955800 | -0.02942000 |
| C  | -1 | 2.64136200  | 0.23506600  | -1.84008900 |
| C  | -1 | 1.63156200  | -0.58866200 | -2.42725800 |
| C  | -1 | 1.86558500  | -1.18294300 | -3.67851500 |
| C  | -1 | 3.05926000  | -1.02047000 | -4.37570000 |
| C  | -1 | 4.05169900  | -0.21038000 | -3.78156200 |
| C  | -1 | 3.84910600  | 0.40084600  | -2.55772400 |
| C  | -1 | 0.31647700  | -0.85465600 | -1.80498000 |

|   |    |             |             |             |
|---|----|-------------|-------------|-------------|
| C | -1 | 0.27052700  | 5.23643500  | 0.04149900  |
| C | -1 | -0.85562300 | 4.36909300  | 0.18409400  |
| C | -1 | -2.14820200 | 4.92225300  | 0.17606500  |
| C | -1 | -2.38489400 | 6.28533900  | 0.01543200  |
| C | -1 | -1.26428700 | 7.12554300  | -0.15139500 |
| C | -1 | -4.63911800 | 1.59749400  | -1.33850500 |
| C | -1 | -0.77079000 | 2.89537100  | 0.36456400  |
| C | -1 | -0.66917200 | -1.08112000 | 3.09401100  |
| C | -1 | -1.34847400 | -2.33247400 | 2.92836600  |
| C | -1 | -0.79755500 | -2.98349900 | 5.23064600  |
| C | -1 | -0.17020200 | -1.72828300 | 5.39620000  |
| C | -1 | -0.11016500 | -0.80609100 | 4.36559400  |
| C | -1 | 2.74385300  | 2.22537400  | 2.83563500  |
| C | 0  | 4.83539300  | -0.45277100 | 0.88162700  |
| C | 0  | 1.68728200  | -2.32188500 | 1.00942800  |
| C | 0  | 2.61601200  | -3.47752900 | 0.65017300  |
| C | 0  | 4.19753800  | -4.25161900 | -1.19791100 |
| C | 0  | 5.30965000  | -4.59037800 | -0.21993100 |
| H | -1 | 1.05037400  | -1.76455200 | -4.11023100 |
| H | -1 | 4.62397500  | 1.02210700  | -2.10506400 |
| H | -1 | -2.97992200 | 4.23568700  | 0.33448000  |
| H | -1 | -3.77586500 | 2.25223100  | -1.47002800 |
| H | -1 | 0.27069600  | -1.47747500 | 6.36344400  |
| H | -1 | 0.38164500  | 0.15993900  | 4.49858800  |
| H | 0  | 1.16138500  | -2.64895100 | 1.92065700  |
| H | 0  | 0.90837100  | -2.27151500 | 0.23800700  |
| H | 0  | 3.83424000  | -2.30667200 | -0.49234300 |
| H | 0  | 3.39359200  | -3.60035200 | 1.40662800  |
| H | 0  | 2.62491200  | -0.96577600 | 2.12710800  |
| H | 0  | 5.37492500  | -2.90556300 | -2.42329900 |
| H | 0  | 5.97189800  | -5.32201000 | -0.68895300 |
| H | 0  | 4.93407700  | -5.03219300 | 0.70537600  |
| H | 0  | 5.90318900  | -3.70423600 | 0.02424600  |
| N | 0  | 2.35279600  | -1.04083600 | 1.14964200  |
| N | 0  | 3.30159800  | -3.18020900 | -0.63849000 |
| H | 0  | 3.21326300  | -1.48434200 | -5.34375300 |
| H | -1 | 5.00874400  | -0.07901100 | -4.29140200 |
| H | -1 | -1.41609100 | 8.19560000  | -0.30972000 |
| O | -1 | 4.10789700  | 3.49395800  | -1.24903700 |
| H | 0  | 4.44050600  | 4.22133800  | -0.71197500 |
| C | -1 | 0.02374400  | 6.61797700  | -0.14033300 |
| H | 0  | 3.24477500  | 2.55096300  | 3.75964700  |
| H | -1 | 0.88699700  | 7.27271400  | -0.27185600 |
| H | 0  | -2.10962100 | -4.53063300 | 2.29870400  |
| H | 0  | -6.30688600 | -3.71865200 | -0.58034400 |

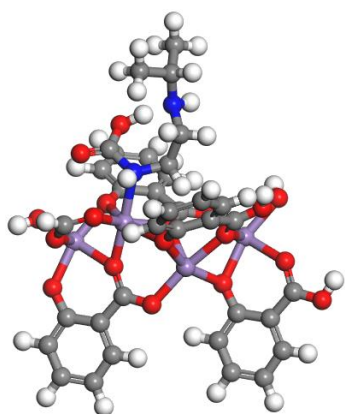

Mn-(D) Intermediate from Gaussian

-1 1

|    |             |             |             |
|----|-------------|-------------|-------------|
| H  | -8.28839600 | -0.69883900 | -0.18999000 |
| Mn | -1.83441200 | -2.47574100 | -1.70005400 |
| O  | -1.09724300 | -4.32497800 | -2.33637700 |
| O  | -3.06882800 | -0.93752000 | -0.95304300 |
| O  | -3.40441600 | -3.72621100 | -0.93701700 |
| O  | -5.45648000 | -4.46965100 | -0.47577100 |
| O  | -1.18529600 | -2.43642300 | 0.39284400  |
| O  | -0.82882400 | -4.54195700 | 1.04377400  |
| H  | -0.63198600 | -4.17314000 | -3.16770500 |
| C  | -4.40063000 | -0.93204700 | -0.77949800 |
| C  | -5.18762500 | -2.11575200 | -0.63694600 |
| C  | -6.57160300 | -1.99312300 | -0.42168300 |
| C  | -7.21959200 | -0.76184500 | -0.35924000 |
| C  | -6.43351300 | 0.39695000  | -0.52896300 |
| C  | -4.64740800 | -3.50075700 | -0.67863700 |
| C  | 0.22805000  | -3.79401900 | 3.45831700  |
| C  | -0.76335800 | -3.29245500 | 1.26335200  |
| H  | 1.19140700  | -4.26786300 | 5.33582400  |
| C  | 6.52579700  | -3.86954300 | -1.16188900 |
| H  | -7.13135700 | -2.91621200 | -0.27064000 |
| H  | 0.04096300  | -4.83296100 | 3.18439400  |
| H  | 2.76927800  | -3.73799700 | 0.50920400  |
| H  | 4.12839600  | -3.26649300 | -1.26792800 |
| H  | 5.35543800  | -4.48557400 | 0.52801100  |
| H  | 5.98872400  | -4.50245100 | -1.87602000 |
| H  | 7.42745000  | -4.40387000 | -0.85195900 |
| H  | -5.18312100 | 5.37312100  | 1.17853600  |
| H  | -6.91492500 | 1.37735400  | -0.51544200 |
| Mn | 1.27153000  | 3.59559500  | -0.32853600 |
| Mn | -1.64778100 | -0.30949000 | 0.49281400  |
| Mn | 1.12910700  | 1.10265200  | 0.52877500  |
| O  | 1.99100900  | 1.84112500  | -1.01649600 |
| O  | 0.02966400  | -0.07503700 | -0.85743000 |
| O  | -0.45897700 | -1.25786400 | -2.72552100 |

|   |             |             |             |
|---|-------------|-------------|-------------|
| O | 0.03758800  | 5.13307400  | 0.41904800  |
| O | -0.30642100 | 2.42484700  | 0.35602700  |
| O | -2.35015800 | 1.60080200  | 0.89600600  |
| O | -0.14770900 | -0.45500800 | 1.93960600  |
| O | 1.92136700  | 3.63397400  | 1.76475300  |
| O | 2.07682600  | 1.55330700  | 2.48956000  |
| O | 4.47124400  | 1.26938100  | 0.77290900  |
| O | 4.64221500  | -0.34679400 | -0.74494300 |
| C | 2.13163000  | 1.33773400  | -2.23486700 |
| C | 1.33239700  | 0.30543200  | -2.81673700 |
| C | 1.54054100  | -0.05666100 | -4.15805900 |
| C | 2.51529500  | 0.53804400  | -4.95399000 |
| C | 3.30318800  | 1.55136100  | -4.36526700 |
| C | 3.11563100  | 1.94200500  | -3.05201200 |
| C | 0.26222200  | -0.41718700 | -2.09564300 |
| C | -1.29421900 | 5.13849600  | 0.59226800  |
| C | -2.08118700 | 3.95478900  | 0.73491300  |
| C | -3.46518400 | 4.07741300  | 0.95015400  |
| C | -4.11317400 | 5.30868900  | 1.01258700  |
| C | -3.32709400 | 6.46748500  | 0.84286800  |
| C | -5.06675300 | 0.31570400  | -0.73422400 |
| C | -1.54108500 | 2.56980700  | 0.69321400  |
| C | 0.13192900  | -1.43437400 | 2.80040200  |
| C | -0.16652600 | -2.81112100 | 2.53532100  |
| C | 0.88964300  | -3.48925900 | 4.64541000  |
| C | 1.13790700  | -2.12497000 | 4.91675500  |
| C | 0.76929500  | -1.13005400 | 4.02767800  |
| C | 2.34387100  | 2.77615000  | 2.63546500  |
| C | 4.04495100  | 0.26110600  | 0.24560500  |
| C | 2.39972800  | -1.63371400 | 0.19610100  |
| C | 3.32646100  | -2.79416700 | 0.53818200  |
| C | 5.66606500  | -3.54442000 | 0.05042700  |
| C | 6.43054800  | -2.70003400 | 1.06108400  |
| H | 0.87715800  | -0.81551400 | -4.57432900 |
| H | 3.73241600  | 2.72369600  | -2.60499400 |
| H | -4.02493600 | 3.15432400  | 1.10118500  |
| H | -4.46385200 | 1.21576100  | -0.86685900 |
| H | 1.62530900  | -1.84929500 | 5.85446500  |
| H | 0.96968700  | -0.07785700 | 4.24099400  |
| H | 1.40044700  | -1.81546000 | 0.58588900  |
| H | 2.29685600  | -1.56180900 | -0.89022000 |
| H | 4.60063500  | -1.43963200 | -0.68175400 |
| H | 3.71533000  | -2.67951800 | 1.55413500  |
| H | 2.79415300  | -0.25684300 | 1.71296300  |
| H | 6.83249900  | -2.95200200 | -1.67531100 |
| H | 7.30785500  | -3.24949000 | 1.41276500  |

|   |             |             |             |
|---|-------------|-------------|-------------|
| H | 5.82692700  | -2.45059500 | 1.93863400  |
| H | 6.76939800  | -1.76637800 | 0.60093200  |
| N | 2.79794300  | -0.30842400 | 0.69422200  |
| N | 4.45532600  | -2.82647800 | -0.40960600 |
| H | 2.65437000  | 0.24368600  | -5.98825800 |
| H | 4.09174500  | 2.02422800  | -4.95493200 |
| H | -3.80850500 | 7.44788900  | 0.85638800  |
| O | 2.64716500  | 4.81310200  | -1.35368400 |
| H | 2.85215700  | 5.53285800  | -0.74663100 |
| C | -1.96033200 | 6.38623800  | 0.63760600  |
| H | 2.88843500  | 3.13135300  | 3.52048200  |
| H | -1.35743200 | 7.28629500  | 0.50497100  |
| H | -0.33763100 | -5.06468300 | 1.68854400  |
| H | -4.96586700 | -5.30389400 | -0.55693000 |

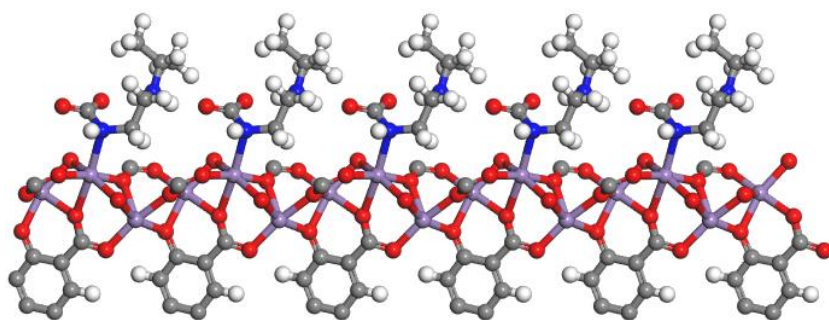

Mn-(D) Intermediate from VASP

1.00000000000000

|                      |                     |                     |
|----------------------|---------------------|---------------------|
| 21.3304735432904771  | 0.0695816222465470  | -0.0432558637702729 |
| -11.2779733474255934 | 19.1400479616044308 | -0.0040016366462945 |
| -0.0196053370615472  | -0.0148588142674603 | 6.9557820960753451  |

| Mn | O  | C  | H  | N |
|----|----|----|----|---|
| 6  | 20 | 48 | 32 | 2 |

Direct

|                    |                    |                    |
|--------------------|--------------------|--------------------|
| 0.3295328342284591 | 0.7435679978830265 | 0.8413714645161505 |
| 0.2623348795492149 | 0.6439968659933015 | 0.1860594488654854 |
| 0.3816348927646587 | 0.6846407313896137 | 0.5043678823358491 |
| 0.6987085250041503 | 0.3579153659518255 | 0.2278072768714807 |
| 0.5906871997178271 | 0.2886474963408432 | 0.8935243626761959 |
| 0.6267783219055616 | 0.3914838133934992 | 0.5606840608342267 |
| 0.4132924532872124 | 0.7830023288787586 | 0.6399499577272962 |
| 0.3605921170839324 | 0.7388263754640647 | 0.2740754672122989 |
| 0.3831470926637195 | 0.8204091608934192 | 0.0543641543975895 |
| 0.2270866659184421 | 0.6894580596720061 | 0.9746772317808450 |
| 0.2707773780790248 | 0.6762459734717652 | 0.6043035547260587 |
| 0.1820471149864247 | 0.6167875044844351 | 0.3909194009684356 |
| 0.3188831326499724 | 0.5982627622518137 | 0.3093625050597808 |
| 0.3316412870649330 | 0.6516959402054283 | 0.9471540477384082 |
| 0.3852811702611447 | 0.6206722546773733 | 0.7250733421972697 |
| 0.5618004842463336 | 0.7700253347239041 | 0.6990977126016418 |

|                    |                    |                    |
|--------------------|--------------------|--------------------|
| 0.5716329938275280 | 0.8324579436982802 | 0.4297915276195994 |
| 0.7305978095991108 | 0.4385323871933196 | 0.4327107462081230 |
| 0.6883448783098203 | 0.3845191982717893 | 0.7987202063613950 |
| 0.7761169232262830 | 0.4109979953519272 | 0.0152238710230179 |
| 0.6426262138323580 | 0.2579411981100961 | 0.0981522356607556 |
| 0.6285916639718536 | 0.2985823197897801 | 0.4636825400801072 |
| 0.5679834715244070 | 0.2145631994936466 | 0.6788476143545452 |
| 0.5421178499372417 | 0.3418862653750523 | 0.7634998384829856 |
| 0.5991105935448999 | 0.3555554255169184 | 0.1307556802941292 |
| 0.5735737394886726 | 0.4146318210558277 | 0.3457422266749930 |
| 0.4451622576539620 | 0.8466587301122530 | 0.5610857174108759 |
| 0.4367508338332868 | 0.8591881642634505 | 0.3637799891032003 |
| 0.4726140359393298 | 0.9278899038992634 | 0.2943533798290261 |
| 0.5173492641878141 | 0.9851065257384306 | 0.4097521504927002 |
| 0.5254201545441788 | 0.9719926753547128 | 0.6042691111279126 |
| 0.4903087002993942 | 0.9050872645759327 | 0.6778348087999220 |
| 0.3911458459720052 | 0.8037187542036861 | 0.2242660380553545 |
| 0.1606976146070878 | 0.6582365424620207 | 0.8937049083298589 |
| 0.1464645139661940 | 0.6349623768708881 | 0.6984504133611864 |
| 0.0744806560782365 | 0.6010743940375818 | 0.6299452930289533 |
| 0.0160351635357046 | 0.5899231718017859 | 0.7437116029241793 |
| 0.0311231032392456 | 0.6144561650302407 | 0.9350302591959974 |
| 0.1012510923954792 | 0.6476550207194123 | 0.0078700022152063 |
| 0.2027704153567242 | 0.6428882220318570 | 0.5590297694760409 |
| 0.3409081649770869 | 0.5580612332094148 | 0.2255397946003868 |
| 0.3597336509748956 | 0.5626918330883370 | 0.0265591174189197 |
| 0.3873844481468254 | 0.5216132334245316 | 0.9550617156447956 |
| 0.3965844855149854 | 0.4751857129254944 | 0.0695099001962731 |
| 0.3754894929511252 | 0.4693427948605446 | 0.2639774566168498 |
| 0.3483662704843411 | 0.5092261615684848 | 0.3396336683430903 |
| 0.3585781504615326 | 0.6139670439989402 | 0.8918664073193128 |
| 0.5493902322757478 | 0.7771354175568916 | 0.5262079884044653 |
| 0.5071599814233991 | 0.7049049455866552 | 0.2163095659410104 |
| 0.5832666603362426 | 0.7461645316660963 | 0.1289548990816556 |
| 0.7968644365669917 | 0.4745592017484483 | 0.5145720880500164 |
| 0.8117573520191073 | 0.4665767203473266 | 0.7105091156841823 |
| 0.8835266672235846 | 0.5051336946764948 | 0.7800640966134509 |
| 0.9411506625925128 | 0.5520849867200468 | 0.6664704773247507 |
| 0.9252960118759574 | 0.5604448100781596 | 0.4744756716438090 |
| 0.8554058597538301 | 0.5229324436719196 | 0.4006759835191716 |
| 0.7563339529366502 | 0.4182627469006945 | 0.8477259897962170 |
| 0.6146457891981143 | 0.1946560432862015 | 0.1798751173964419 |
| 0.5911519876505906 | 0.1804284624782966 | 0.3751269757420133 |
| 0.5601355434934021 | 0.1118713897686021 | 0.4445675969020684 |
| 0.5524659262241443 | 0.0566435983962350 | 0.3320555129167957 |
| 0.5776057737582647 | 0.0718620618103358 | 0.1409582243180552 |

|                    |                    |                    |
|--------------------|--------------------|--------------------|
| 0.6076530352151508 | 0.1386358536506904 | 0.0669520285192533 |
| 0.5956829649862385 | 0.2334801503168933 | 0.5121976291796386 |
| 0.5066973312287359 | 0.3712342583423549 | 0.8438439346208000 |
| 0.5163840443927441 | 0.3943863532128802 | 0.0391735730445433 |
| 0.4789462682580634 | 0.4270667336388243 | 0.1068893567437499 |
| 0.4312280023190240 | 0.4370929412125690 | 0.9926298031963867 |
| 0.4205562480232956 | 0.4122046703347308 | 0.8015872794099366 |
| 0.4570622314653789 | 0.3803045619840120 | 0.7293919097817181 |
| 0.5655512132688543 | 0.3881945766697257 | 0.1782757089621114 |
| 0.6743735682542891 | 0.8702696439412207 | 0.0153243886014849 |
| 0.6715734849415469 | 0.9324045860308487 | 0.9315347692884970 |
| 0.7259882108737159 | 0.8900224354260828 | 0.1867576685455319 |
| 0.4627175687096283 | 0.9352487692934659 | 0.1446105947953242 |
| 0.5610603305053843 | 0.0155913583811227 | 0.6981194737640806 |
| 0.4970855730982606 | 0.8954703078809843 | 0.8282480528914036 |
| 0.0654397624804020 | 0.5818836905817690 | 0.4823031988247592 |
| 0.9867250099079712 | 0.6079434344794024 | 0.0268381069316206 |
| 0.1126122305839345 | 0.6666179355492687 | 0.1559512931438363 |
| 0.4044563595983135 | 0.5294196207327460 | 0.8052181034049610 |
| 0.3803185123394357 | 0.4321539883872560 | 0.3564585369083630 |
| 0.3324682933303507 | 0.5046668543734611 | 0.4902953773201091 |
| 0.4851743197475997 | 0.6493807464660435 | 0.1858825033504345 |
| 0.5866771456243640 | 0.7202270336776451 | 0.9985705941761722 |
| 0.8931997711542365 | 0.4957020040563407 | 0.9280740248934904 |
| 0.9690245546262872 | 0.5978679794391226 | 0.3826324377655936 |
| 0.8437116408766414 | 0.5297292886454628 | 0.2518940135375871 |
| 0.5402314444251317 | 0.1027541994591630 | 0.5918448966648810 |
| 0.5738082990566937 | 0.0301318860868136 | 0.0494958744397351 |
| 0.6268259447398350 | 0.1497602913019094 | 0.9188550091245560 |
| 0.4901554655075060 | 0.4463853886035878 | 0.2544323823962031 |
| 0.3820869145962931 | 0.4175051718149732 | 0.7091328366299621 |
| 0.4483785390111805 | 0.3612281301619120 | 0.5814243037922608 |
| 0.4710294710305973 | 0.7191435617171962 | 0.1401893634384095 |
| 0.5666207595767432 | 0.8090713903089650 | 0.9470500541123172 |
| 0.5816380009567936 | 0.8341636218465140 | 0.1946953192383205 |
| 0.6249284690673633 | 0.7521576615013643 | 0.2326501717650373 |
| 0.5021536991855413 | 0.6720253914676064 | 0.4997744655743617 |
| 0.6891197082948111 | 0.8453896779195205 | 0.9010515888702955 |
| 0.6533363069898428 | 0.9561447149958724 | 0.0403967923895507 |
| 0.6350261650863160 | 0.9166010075785564 | 0.8061395605194903 |
| 0.7259685775296418 | 0.9723582588023447 | 0.8846085379463489 |
| 0.7803179732441521 | 0.9312541629880755 | 0.1433840904779231 |
| 0.7310875895775126 | 0.8460863969404642 | 0.2393043184244306 |
| 0.7076460365413197 | 0.9094933475856948 | 0.3066778704998185 |
| 0.5007195908424436 | 0.7110800486050692 | 0.4260652696785456 |
| 0.5978066138092970 | 0.8169029732080801 | 0.0708739403233665 |



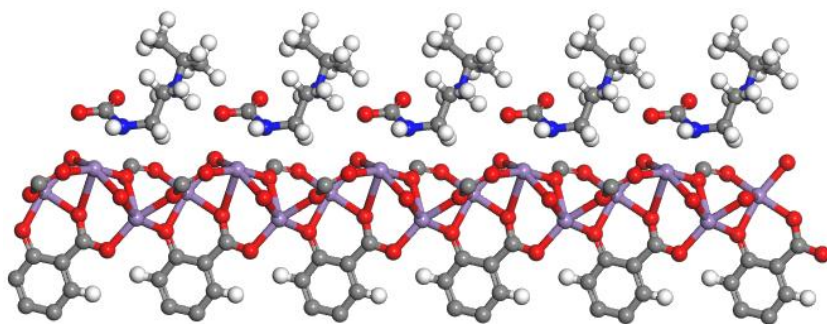

Mn-(E) TS<sub>2</sub>

```

1.0000000000000000
 21.2498308616025149    0.0000000000000000    0.0000000000000000
-11.2124101426997225   19.1697357759203584    0.0000000000000000
 -0.0339179209869972    0.0082559901308093    6.8771616946611127

```

```

Mn   O   C   H   N
  6   20  48  32   2

```

Direct

```

0.3314091250379053  0.7443320409032053  0.8223491482599069
0.2641335756014496  0.6482474192910950  0.1804814536804952
0.3933160509015959  0.6869052985001101  0.4810042054784841
0.6987547174741702  0.3597532182158170  0.2284510596483025
0.5901510808335245  0.2890588739864369  0.8931793711991854
0.6253401358920199  0.3923176480312371  0.5592514255526999
0.4189277977915087  0.7818242297655715  0.6250852763965102
0.3703524025852842  0.7400251043782693  0.2508245370686815
0.3885672154277277  0.8225727525854403  0.0358650214368022
0.2296533334505326  0.6954767348506942  0.9651242428939300
0.2713283375451867  0.6864958194652011  0.5768805066368169
0.1799117176981969  0.6183746034941691  0.3789185662598504
0.3192690153175651  0.5999895486019818  0.2993204645660368
0.3244368922852419  0.6471397123883903  0.9244908635053284
0.3836419696206569  0.6191450773922929  0.7083774383998358
0.5396220662302819  0.7506391166061545  0.5895305755623664
0.5780613153183084  0.8214366421944217  0.3204011535322860
0.7294105416124701  0.4415115532470266  0.4296928368142359
0.6875855670488173  0.3882377756228816  0.8024030893388838
0.7768997482850568  0.4135368445555938  0.0158853066626654
0.6452775093321917  0.2604880511376742  0.0965418441974175
0.6305231513346559  0.2993664179444375  0.4688503699219367
0.5670115742633999  0.2135870599624526  0.6805335419395413
0.5390839341587438  0.3395186655509492  0.7599647639994453
0.5952254188742324  0.3535326869642973  0.1346582286250051
0.5709212462095421  0.4154383328018261  0.3443341008433652
0.4507114609945510  0.8460818700431654  0.5480097754000189
0.4431724966809076  0.8600648264897909  0.3487100279969554
0.4779182783940429  0.9293427569705768  0.2824517282562936
0.5210264724864243  0.9860305339424384  0.4025499133985171

```

|                    |                    |                    |
|--------------------|--------------------|--------------------|
| 0.5282989154204529 | 0.9716020186318074 | 0.5985826886240020 |
| 0.4941913661268134 | 0.9039954849942770 | 0.6692633860339858 |
| 0.3985249011421591 | 0.8052366275703787 | 0.2049871083182308 |
| 0.1626385184733081 | 0.6644074745269100 | 0.8858807000171693 |
| 0.1470765665354615 | 0.6403973422749109 | 0.6892612968207138 |
| 0.074434555274733  | 0.6061052661170480 | 0.6234424669495205 |
| 0.0163513552708262 | 0.5955531806937768 | 0.7401769476956336 |
| 0.0326050937976058 | 0.6209973617799794 | 0.9323056146216266 |
| 0.1034234436000013 | 0.6543866062298150 | 0.0029853283573134 |
| 0.2024196550099822 | 0.6485781958695008 | 0.5437684344761546 |
| 0.3381269242301237 | 0.5574699908503282 | 0.2145534040330999 |
| 0.3544627705819495 | 0.5597173322183474 | 0.0119725520326834 |
| 0.3810067681269907 | 0.5174743287348041 | 0.9411702973281796 |
| 0.3909150596661118 | 0.4718851983292726 | 0.0595500895928910 |
| 0.3709906226565936 | 0.4675370927117845 | 0.2570513972390720 |
| 0.3451719440505847 | 0.5086337249465981 | 0.3320718239129210 |
| 0.3536297427301583 | 0.6109078379917277 | 0.8735847737868438 |
| 0.5455018407715757 | 0.7637954733037241 | 0.4071120334463404 |
| 0.5141102821836043 | 0.7019456628001294 | 0.0824022167596765 |
| 0.5925094710033807 | 0.7468804031822214 | 0.0056212126116897 |
| 0.7959683384278068 | 0.4785726735628439 | 0.5116693119037339 |
| 0.8113956627413446 | 0.4705487104539918 | 0.7093422812375167 |
| 0.8834432257507602 | 0.5097003399344688 | 0.7792186986526309 |
| 0.9408994225149730 | 0.5574420668142757 | 0.6640054396445639 |
| 0.9244050554040344 | 0.5660784318251307 | 0.4704884184914066 |
| 0.8542372066628399 | 0.5279743979417942 | 0.3964195507048015 |
| 0.7562266478361415 | 0.4216049136128306 | 0.8484293298972307 |
| 0.6178086235896282 | 0.1969603980275257 | 0.1778993113249842 |
| 0.5928088083837348 | 0.1814311249645912 | 0.3741523980354340 |
| 0.5617354506240098 | 0.1124220749995077 | 0.4422752282832376 |
| 0.5558486198139644 | 0.0582053191460911 | 0.3274740403104052 |
| 0.5830843061680202 | 0.0749544913837352 | 0.1361302315543098 |
| 0.6129804785791294 | 0.1420720890681134 | 0.0632089485955380 |
| 0.5964144030277904 | 0.2336965243878386 | 0.5138794213047605 |
| 0.5026090957902795 | 0.3681764377700252 | 0.8394147161252696 |
| 0.5124890213236878 | 0.3924021913784921 | 0.0355316984989849 |
| 0.4744360892695073 | 0.4249270658917101 | 0.1013500304585590 |
| 0.4257447036761277 | 0.4335159238583856 | 0.9846923081919267 |
| 0.4145451269415067 | 0.4071220463680105 | 0.7934862069197454 |
| 0.4517440368683271 | 0.3754711917044263 | 0.7229461413372094 |
| 0.5621483288201236 | 0.3872238051960798 | 0.1775995225354814 |
| 0.6770225812083026 | 0.8671054519763388 | 0.8539895074960682 |
| 0.6695327066171363 | 0.9210239459914431 | 0.7334781875373808 |
| 0.7293455210748941 | 0.8992146480943694 | 0.0250846431163030 |
| 0.4684744808528035 | 0.9375878409374615 | 0.1312577493475248 |
| 0.5624142149715932 | 0.0147509361214524 | 0.6962624629189437 |

|                    |                    |                    |
|--------------------|--------------------|--------------------|
| 0.4998140699598737 | 0.8936403083190809 | 0.8217093390798922 |
| 0.0646782891000547 | 0.5863338270026895 | 0.4749397596694042 |
| 0.9886015242187638 | 0.6150419015932241 | 0.0266748027295768 |
| 0.1154362849592612 | 0.6738509833577537 | 0.1519244185412218 |
| 0.3971276269072240 | 0.5240606719120398 | 0.7887376482380092 |
| 0.3760027160439727 | 0.4307365951291224 | 0.3523790968151525 |
| 0.3304538922900526 | 0.5055314994205020 | 0.4851486570725920 |
| 0.4930017382469588 | 0.6477156759013702 | 0.0384109398258719 |
| 0.6027837781578858 | 0.7200421167188104 | 0.8874732205139046 |
| 0.8934850881343381 | 0.5000816775221752 | 0.9285636934379110 |
| 0.9679658459434169 | 0.6041132435730390 | 0.3773955807612993 |
| 0.8422705193179678 | 0.5350095581294473 | 0.2463078338602524 |
| 0.5405477721249763 | 0.1022084985623544 | 0.5901802327763358 |
| 0.5811149764013984 | 0.0341089764024296 | 0.0437981493467115 |
| 0.6336639323238933 | 0.1543683439225150 | 0.9147867166665953 |
| 0.4858886777726452 | 0.4452415649984211 | 0.2493114942324117 |
| 0.3751931514407740 | 0.4111160205158801 | 0.6995902567447085 |
| 0.4427584794806845 | 0.3553467415868798 | 0.5747045518899255 |
| 0.4791426868078722 | 0.7185844396753445 | 0.0091188956042847 |
| 0.5684978240334122 | 0.7978736102244015 | 0.7942755006329190 |
| 0.5845075799106508 | 0.8336419867669606 | 0.0314623546762392 |
| 0.6327958564654238 | 0.7596349881945159 | 0.1214683584361809 |
| 0.5022373274277689 | 0.6594929185770315 | 0.3609546347038284 |
| 0.6943995575925540 | 0.8384393597356108 | 0.7586052233372550 |
| 0.6502754404777983 | 0.9492164909666593 | 0.8239504832716580 |
| 0.6316960824668464 | 0.8966726229318248 | 0.6108122513190127 |
| 0.7229322681571847 | 0.9594616964245174 | 0.6743478800770553 |
| 0.7828017314440908 | 0.9393448305622397 | 0.9704965308586003 |
| 0.7370484838179431 | 0.8608381148542494 | 0.1066018218744125 |
| 0.7095091071575809 | 0.9240362973873182 | 0.1266828385052080 |
| 0.5040885323287858 | 0.7013103291308977 | 0.2934596348052398 |
| 0.6017920972754873 | 0.8131841695784869 | 0.9218720835346339 |

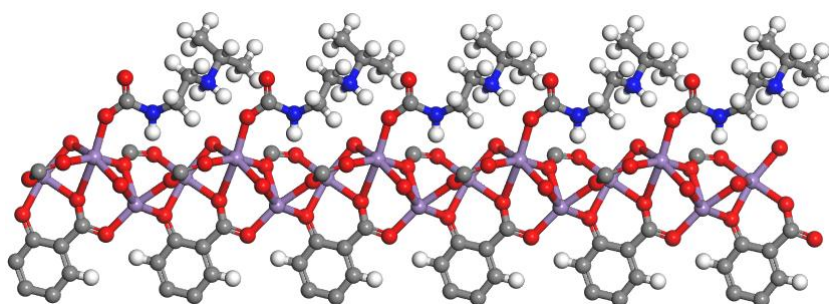

Mn-(F) Product

|                      |                     |                     |   |   |
|----------------------|---------------------|---------------------|---|---|
| 1.0000000000000000   |                     |                     |   |   |
| 20.9245799419025396  | -0.1053206318223693 | -0.0181379244010517 |   |   |
| -11.3619565890199148 | 19.1003687076959601 | 0.0736231950683150  |   |   |
| -0.0883374233546371  | -0.0110323608951118 | 6.9261511732832588  |   |   |
| Mn                   | O                   | C                   | H | N |

## Direct

|                    |                    |                    |
|--------------------|--------------------|--------------------|
| 0.3419046512894326 | 0.7506651840588034 | 0.8146523989108161 |
| 0.2657927297588927 | 0.6527897254108694 | 0.1667661787689667 |
| 0.3939257914686820 | 0.6865344805065803 | 0.4688367253039587 |
| 0.6975774732898969 | 0.3651656630154747 | 0.2228131961756290 |
| 0.5877880632654566 | 0.2891571956432486 | 0.8870894800366855 |
| 0.6188896130324153 | 0.3914420306283262 | 0.5541534945403228 |
| 0.4327104946886422 | 0.7852289037078890 | 0.6217369880277062 |
| 0.3728267289993639 | 0.7441982968935008 | 0.2491284848320916 |
| 0.4044070398057755 | 0.8282829366883746 | 0.0286521227696142 |
| 0.2376668151228145 | 0.7050085913285358 | 0.9528545752736335 |
| 0.2784181990419441 | 0.6922174835705519 | 0.5732645958008575 |
| 0.1841299907311438 | 0.6293209541145899 | 0.3695864019364734 |
| 0.3174044316454143 | 0.6006209817282340 | 0.2844083871532135 |
| 0.3326419685588604 | 0.6546382349850433 | 0.9227334191622347 |
| 0.3776561148287669 | 0.6162777727323032 | 0.6952398330701826 |
| 0.5052780962914269 | 0.7204874681910809 | 0.3945483682412245 |
| 0.6095870387958158 | 0.7308564550307182 | 0.2675890510849968 |
| 0.7250057999326316 | 0.4453970979507815 | 0.4255886299356817 |
| 0.6845488486193076 | 0.3906174716010256 | 0.7955666526046841 |
| 0.7764820982981533 | 0.4220387284922111 | 0.0112635961611716 |
| 0.6469018065800967 | 0.2647086673294439 | 0.0937300663153522 |
| 0.6294172604796984 | 0.3019160581311411 | 0.4618389076405052 |
| 0.5699970724774914 | 0.2152255145131861 | 0.6754400953278932 |
| 0.5315453253845988 | 0.3353461683122063 | 0.7536059255290297 |
| 0.5904205771245543 | 0.3520522666684016 | 0.1255784875161012 |
| 0.5607620642679549 | 0.4088225402422978 | 0.3364846609560601 |
| 0.4636906602753896 | 0.8496984889224919 | 0.5440297443946776 |
| 0.4558496688468807 | 0.8639276524112063 | 0.3457908039087769 |
| 0.4909508896080723 | 0.9338665491995073 | 0.2819124030759568 |
| 0.5339159176297343 | 0.9912141839520388 | 0.4022364492389769 |
| 0.5415684484202217 | 0.9767615790525710 | 0.5969412945292873 |
| 0.5078280369293822 | 0.9083969175840352 | 0.6652917746414104 |
| 0.4088814616127721 | 0.8095518983471237 | 0.2001960177146529 |
| 0.1690120018676851 | 0.6749712577730378 | 0.8733694290183749 |
| 0.1522018477490263 | 0.6508984571057823 | 0.6783189120216022 |
| 0.0777249860297431 | 0.6169316465424828 | 0.6131971935072045 |
| 0.0191922686518993 | 0.6066153280879192 | 0.7297753654015295 |
| 0.0368656247837791 | 0.6326347308803832 | 0.9200556519853436 |
| 0.1095459982613320 | 0.6659570681048663 | 0.9896778458023903 |
| 0.2079603319456567 | 0.6577348037088413 | 0.5354239742478271 |
| 0.3340917293088310 | 0.5564840602304315 | 0.2006836838028292 |
| 0.3511880000483956 | 0.5592100860019045 | 0.0002982513687826 |
| 0.3751499636334330 | 0.5150980420136477 | 0.9290152219716035 |
| 0.3816356368218550 | 0.4672309763832061 | 0.0457238257128836 |

|                    |                    |                    |
|--------------------|--------------------|--------------------|
| 0.3604444754249769 | 0.4622426966022246 | 0.2408325434154435 |
| 0.3371080502603263 | 0.5051289835003132 | 0.3160364249285550 |
| 0.3530123825398306 | 0.6118449840004700 | 0.8646849372395948 |
| 0.5461691199405152 | 0.7222381938711706 | 0.2484416897922017 |
| 0.5437776233687686 | 0.6979875910469886 | 0.9011259066371338 |
| 0.6147670790982289 | 0.7582805404249271 | 0.8135874578906837 |
| 0.7930831571747490 | 0.4845098735302358 | 0.5069886335819689 |
| 0.8098739870926934 | 0.4775977278283960 | 0.7036631081695219 |
| 0.8837920775729202 | 0.5188584991373304 | 0.7718400253434439 |
| 0.9416310690035630 | 0.5673292787487512 | 0.6558429696649029 |
| 0.9236947981801578 | 0.5750630346250176 | 0.4636841420378914 |
| 0.8516802352932658 | 0.5350581758478441 | 0.3913845953573230 |
| 0.7546032929448785 | 0.4276253669919896 | 0.8429606002007333 |
| 0.6226391233920054 | 0.2017663870897266 | 0.1761759723910359 |
| 0.5982312225168727 | 0.1854180863948827 | 0.3716512736259503 |
| 0.5703264905715457 | 0.1167010215830757 | 0.4406796133989701 |
| 0.5669608261255092 | 0.0635903767554140 | 0.3275262565810237 |
| 0.5937075352439010 | 0.0811665910945081 | 0.1370652408419843 |
| 0.6206250052279927 | 0.1480182195961603 | 0.0634290763647343 |
| 0.5987579927116258 | 0.2364209285839323 | 0.5092316537058110 |
| 0.4939217865955285 | 0.3632821131219828 | 0.8313036581300821 |
| 0.5033068300026216 | 0.3869100683969791 | 0.0264408452835809 |
| 0.4645426862950117 | 0.4190152584235634 | 0.0903582622071468 |
| 0.4156659010559451 | 0.4279785655113031 | 0.9724376555835619 |
| 0.4047364238001663 | 0.4020984331317621 | 0.7820482689084400 |
| 0.4425235588583050 | 0.3706407083092387 | 0.7136238118147489 |
| 0.5539934095461518 | 0.3826364707105583 | 0.1691601916191985 |
| 0.6691101711507272 | 0.8602310242390487 | 0.5785484771484022 |
| 0.6474470839378057 | 0.8933871527312292 | 0.4163368026286847 |
| 0.7211637186743332 | 0.9147826472833245 | 0.7259031784499683 |
| 0.4811105257457768 | 0.9421642693427330 | 0.1317636292982911 |
| 0.5754309832803273 | 0.0202219870029268 | 0.6954981923712467 |
| 0.5132430962296866 | 0.8980433450650693 | 0.8173488854037032 |
| 0.0667050894944197 | 0.5967680755690381 | 0.4660399349365960 |
| 0.9925249477455367 | 0.6269936238480511 | 0.0138635912435063 |
| 0.1227485770748800 | 0.6856845196545649 | 0.1374085822875841 |
| 0.3920571107671975 | 0.5219573541750719 | 0.7783235869895933 |
| 0.3628669258102732 | 0.4236864885053393 | 0.3346022664814399 |
| 0.3218300420158045 | 0.5016739446974725 | 0.4675824955280703 |
| 0.5565513280274743 | 0.6576669297205413 | 0.9464190853551884 |
| 0.6426753758864336 | 0.7369890067306457 | 0.7292344985743853 |
| 0.8950842236980279 | 0.5100940812115908 | 0.9202783041402327 |
| 0.9675330868785750 | 0.6138129567317989 | 0.3703634993593354 |
| 0.8384093277753877 | 0.5413104977551342 | 0.2424007076069330 |
| 0.5491714472136664 | 0.1056409779949803 | 0.5876845743803685 |
| 0.5936759404499767 | 0.0412432689466158 | 0.0460022482957001 |

|                    |                    |                    |
|--------------------|--------------------|--------------------|
| 0.6409347631045250 | 0.1610675848604757 | 0.9156978196654890 |
| 0.4761313096145585 | 0.4393310933073238 | 0.2373539036579828 |
| 0.3653900120813560 | 0.4065884993103381 | 0.6866291664804578 |
| 0.4339053495896366 | 0.3511698096009965 | 0.5657154646856384 |
| 0.4995552533878964 | 0.6742740687160165 | 0.7901786990623378 |
| 0.5622810613146569 | 0.7674266955157591 | 0.5626164491147705 |
| 0.5713733041784224 | 0.8221623031254381 | 0.7420226645461483 |
| 0.6524509997751053 | 0.7918393093001939 | 0.9286537255281644 |
| 0.4614638045683392 | 0.7047705473431591 | 0.0609296682268194 |
| 0.6241725157706526 | 0.9239848590139061 | 0.4729555419023015 |
| 0.6067898869311747 | 0.8539831347232507 | 0.3159580729128564 |
| 0.6976962295044515 | 0.9291869327469442 | 0.3343415766966231 |
| 0.6948768162619317 | 0.8326749173928150 | 0.5150428368067637 |
| 0.7696835250801968 | 0.9569122370234524 | 0.6506513176046766 |
| 0.7420105411740749 | 0.8932519566522714 | 0.8361868540874369 |
| 0.6931897894112282 | 0.9388319202168915 | 0.7981987693852162 |
| 0.5156125179957556 | 0.7177507381973314 | 0.0654458842620755 |
| 0.5998377173583762 | 0.8019123321132327 | 0.6746356487601375 |

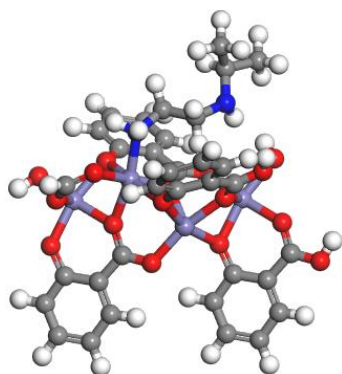

Fe-(A) i-2-MOF

-1 1

|    |    |             |             |             |
|----|----|-------------|-------------|-------------|
| H  | 0  | -0.92668000 | 7.76531300  | -0.61110400 |
| H  | -1 | 1.19065900  | 6.47602400  | -0.98740200 |
| Fe | -1 | -2.45247700 | 1.18630900  | -1.48620900 |
| O  | -1 | -4.23223000 | 0.23538000  | -1.97304100 |
| O  | -1 | -0.94232700 | 2.50053700  | -1.02323900 |
| O  | -1 | -3.69822900 | 2.69335200  | -0.90524300 |
| O  | -1 | -4.56767300 | 4.71603400  | -0.56980500 |
| O  | -1 | -2.25461700 | 0.79350100  | 0.62586300  |
| O  | -1 | -4.29902600 | 0.37309900  | 1.40964000  |
| H  | 0  | -3.98836900 | -0.45528700 | -2.60059600 |
| C  | -1 | -0.99247200 | 3.83925500  | -0.95067600 |
| C  | -1 | -2.20517500 | 4.58090400  | -0.80272900 |
| C  | -1 | -2.14586800 | 5.98033400  | -0.67420100 |
| C  | -1 | -0.94695600 | 6.68661400  | -0.71543900 |
| C  | -1 | 0.23865800  | 5.94580300  | -0.91057400 |
| C  | -1 | 0.21997600  | 4.56645200  | -1.02619100 |
| C  | -1 | -3.54842500 | 3.96397400  | -0.75069500 |

|    |    |             |             |             |
|----|----|-------------|-------------|-------------|
| C  | -1 | -2.45369800 | -0.13900000 | 2.82494600  |
| C  | -1 | -3.34803200 | -0.52635800 | 3.83772500  |
| C  | -1 | -3.04097700 | 0.37549200  | 1.56861500  |
| H  | 0  | -3.62748400 | -1.38183900 | 5.80394900  |
| C  | 0  | -4.11430300 | -3.95242600 | -0.78916700 |
| C  | 0  | -4.54116700 | -4.90056900 | 0.32665900  |
| C  | 0  | -5.27257300 | -3.68498200 | -1.74145900 |
| H  | -1 | -3.08791300 | 6.50278300  | -0.50592800 |
| H  | -1 | -4.41252500 | -0.41431600 | 3.62875500  |
| H  | 0  | -3.59631000 | -1.97346100 | -0.96613800 |
| H  | 0  | -5.35462700 | -4.45417700 | 0.90899600  |
| H  | 0  | -3.71828200 | -5.12688100 | 1.01237500  |
| H  | 0  | -4.89219700 | -5.84925100 | -0.09097400 |
| H  | 0  | -6.11096100 | -3.23253600 | -1.20069300 |
| H  | 0  | -5.61867400 | -4.61340900 | -2.20490700 |
| H  | 0  | -4.97641400 | -2.99760900 | -2.54174600 |
| N  | 0  | -3.67103300 | -2.67853900 | -0.23712200 |
| H  | 0  | 5.23154300  | 5.11878200  | 0.58172000  |
| H  | -1 | 7.34806000  | 3.82877500  | 0.20617200  |
| Fe | -1 | 3.70492400  | -1.46094000 | -0.29263500 |
| Fe | -1 | -0.24338500 | 1.23348000  | 0.50838600  |
| Fe | 0  | 1.00326900  | -1.39996500 | 0.72003400  |
| O  | 0  | 1.92719900  | -2.36751800 | -0.78610300 |
| O  | 0  | -0.06014400 | -0.48943500 | -0.66012700 |
| O  | -1 | -1.33097400 | -0.21586500 | -2.47580700 |
| O  | -1 | 5.21507400  | -0.14671200 | 0.17033500  |
| O  | 0  | 2.46725400  | 0.03653000  | 0.31072900  |
| O  | -1 | 1.58963800  | 2.06882400  | 0.62375100  |
| O  | 0  | -0.14433400 | -0.10077700 | 2.04202400  |
| O  | -1 | 3.90278400  | -1.85374800 | 1.81943800  |
| O  | 0  | 1.86464600  | -2.28678200 | 2.59443200  |
| C  | -1 | 1.47278000  | -2.59625400 | -2.02873800 |
| C  | -1 | 0.36868600  | -1.88361000 | -2.59667100 |
| C  | -1 | -0.00560100 | -2.12939400 | -3.92931800 |
| C  | -1 | 0.63469900  | -3.07092900 | -4.73039800 |
| C  | -1 | 1.70095500  | -3.79103600 | -4.15036200 |
| C  | -1 | 2.10966300  | -3.56046500 | -2.84822300 |
| C  | -1 | -0.39027200 | -0.83727500 | -1.87673900 |
| C  | -1 | 5.16492900  | 1.19200600  | 0.24289800  |
| C  | -1 | 3.95222600  | 1.93365500  | 0.39084500  |
| C  | -1 | 4.01153400  | 3.33308400  | 0.51937400  |
| C  | -1 | 5.21035500  | 4.03940400  | 0.47811800  |
| C  | -1 | 6.39596900  | 3.29859200  | 0.28298200  |
| C  | -1 | 6.37737700  | 1.91920300  | 0.16738300  |
| C  | -1 | 2.60888600  | 1.31676400  | 0.44286200  |
| C  | -1 | -1.05055600 | -0.36097100 | 2.99888400  |

|   |    |             |             |             |
|---|----|-------------|-------------|-------------|
| H | 0  | 3.55426000  | -2.58678200 | 3.71934800  |
| C | -1 | -2.91986200 | -1.08551600 | 5.03895300  |
| C | -1 | -1.52713300 | -1.23474000 | 5.22547500  |
| C | -1 | -0.61972600 | -0.88584500 | 4.24132600  |
| C | -1 | 3.11642500  | -2.27175700 | 2.76219000  |
| C | 0  | -1.25618400 | -3.44993900 | 0.12587700  |
| C | 0  | -2.48588400 | -2.67688000 | 0.59333300  |
| H | 0  | -0.37861600 | -3.13537800 | 1.94561600  |
| H | -1 | -0.81184800 | -1.51790300 | -4.33541000 |
| H | -1 | 2.95171400  | -4.11069100 | -2.42422200 |
| H | -1 | 3.06948800  | 3.85553400  | 0.68764600  |
| H | -1 | 1.14138500  | 4.00159900  | -1.17521100 |
| H | -1 | -1.15900500 | -1.62889000 | 6.17499700  |
| H | -1 | 0.45384900  | -1.01136600 | 4.39008400  |
| H | 0  | -1.02192600 | -3.21758500 | -0.91571700 |
| H | 0  | -1.41852200 | -4.53249800 | 0.19012400  |
| H | 0  | -2.15888100 | -1.64147200 | 0.69138600  |
| H | 0  | -2.73857200 | -3.02473700 | 1.60667600  |
| H | 0  | 0.62272000  | -3.76574100 | 0.85510100  |
| H | 0  | -3.31348900 | -4.45205100 | -1.36690900 |
| N | 0  | -0.10303900 | -3.06025700 | 0.96605600  |
| H | 0  | 0.32878200  | -3.23842300 | -5.75684300 |
| H | -1 | 2.20775200  | -4.55798800 | -4.73962900 |
| O | -1 | 4.82642800  | -2.86311400 | -1.28223200 |
| H | 0  | 5.72743900  | -2.75177400 | -0.95991100 |
| H | -1 | 7.29878700  | 1.35435000  | 0.01836300  |
| H | 0  | -4.76903100 | -0.10065600 | 2.10690100  |
| H | 0  | -5.36549700 | 4.16216700  | -0.58249700 |

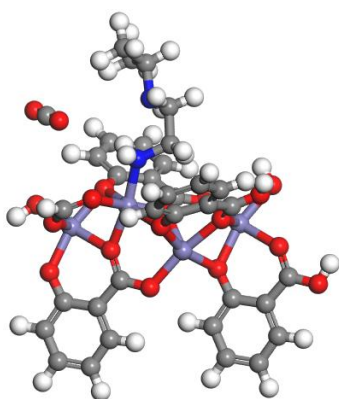

Fe-(B) Complex

|      |    |             |             |             |
|------|----|-------------|-------------|-------------|
| -1 1 |    |             |             |             |
| H    | 0  | -8.08413300 | 1.83657700  | -0.96075700 |
| Fe   | -1 | -2.46851500 | -1.96503200 | -1.59346900 |
| O    | -1 | -2.28817700 | -3.94274300 | -2.08341000 |
| O    | -1 | -3.17257500 | -0.10060100 | -1.09513900 |
| O    | -1 | -4.34750600 | -2.57679600 | -0.97656400 |
| O    | -1 | -6.57289700 | -2.67178500 | -0.83486800 |



|    |    |             |             |             |
|----|----|-------------|-------------|-------------|
| O  | -1 | -2.01884200 | -1.98001600 | 0.50278100  |
| O  | -1 | -2.52046200 | -4.00977400 | 1.28313500  |
| H  | 0  | -1.43551500 | -4.07039400 | -2.51459400 |
| C  | -1 | -4.44086600 | 0.34221100  | -1.08557700 |
| C  | -1 | -5.57941600 | -0.51563700 | -0.99579800 |
| C  | -1 | -6.86546900 | 0.04962300  | -0.94433100 |
| C  | -1 | -7.08292400 | 1.42359700  | -1.00516800 |
| C  | -1 | -5.95095000 | 2.25625500  | -1.13739900 |
| C  | -1 | -5.49386900 | -1.99226500 | -0.92739600 |
| C  | -1 | -1.44401400 | -3.47232700 | 3.76511800  |
| C  | -1 | -2.02868600 | -2.85111000 | 1.45626700  |
| H  | 0  | -0.84904800 | -4.06317400 | 5.75882900  |
| C  | 0  | 5.41033400  | -3.47825100 | -2.14304400 |
| H  | -1 | -7.70340300 | -0.63715800 | -0.82106900 |
| H  | -1 | -1.92539500 | -4.42066800 | 3.52330300  |
| H  | 0  | 3.04848100  | -3.07383600 | -1.40993000 |
| H  | 0  | 4.43165000  | -5.06646800 | -1.08780700 |
| H  | 0  | 4.70516400  | -3.45222500 | -2.98129100 |
| H  | 0  | 6.26057800  | -4.09953100 | -2.43860700 |
| H  | 0  | -3.39339100 | 6.61271600  | 0.43949600  |
| H  | -1 | -6.09103700 | 3.33557500  | -1.22767900 |
| Fe | -1 | 2.22262900  | 2.81023700  | -0.19145400 |
| Fe | -1 | -1.77632400 | 0.08450700  | 0.45193500  |
| Fe | 0  | 1.08762600  | 0.31835200  | 0.79564700  |
| O  | 0  | 2.38483100  | 0.83485300  | -0.68225800 |
| O  | 0  | -0.07324700 | -0.31533200 | -0.66687800 |
| O  | -1 | -0.72691100 | -1.39025700 | -2.51106900 |
| O  | -1 | 1.51859100  | 4.67467700  | 0.30689800  |
| O  | 0  | 0.34970400  | 2.19992100  | 0.41094300  |
| O  | -1 | -1.88172900 | 2.10349500  | 0.56717000  |
| O  | 0  | -0.59137600 | -0.30636100 | 2.04917600  |
| O  | -1 | 2.67233400  | 2.79528300  | 1.90483000  |
| O  | 0  | 2.13019900  | 0.78855400  | 2.69149700  |
| O  | 0  | 5.46258800  | -0.23053000 | 1.28758600  |
| O  | 0  | 6.65190700  | 0.57573500  | -0.54723400 |
| C  | -1 | 2.50196500  | 0.30713900  | -1.91097300 |
| C  | -1 | 1.47069000  | -0.46908200 | -2.52344900 |
| C  | -1 | 1.66071200  | -0.97492300 | -3.82032700 |
| C  | -1 | 2.83868500  | -0.77569200 | -4.53445300 |
| C  | -1 | 3.85697300  | -0.02259200 | -3.90931700 |
| C  | -1 | 3.69431800  | 0.50857200  | -2.64375700 |
| C  | -1 | 0.18207100  | -0.76584700 | -1.87034700 |
| C  | -1 | 0.25029900  | 5.11749300  | 0.31645200  |
| C  | -1 | -0.88825000 | 4.25964500  | 0.40623900  |
| C  | -1 | -2.17430500 | 4.82490400  | 0.45770000  |
| C  | -1 | -2.39182800 | 6.19880700  | 0.39684400  |

|   |    |             |             |             |
|---|----|-------------|-------------|-------------|
| C | -1 | -1.25978500 | 7.03153500  | 0.26463400  |
| C | -1 | -4.66892700 | 1.73522300  | -1.17723100 |
| C | -1 | -0.80276600 | 2.78294700  | 0.47462600  |
| C | -1 | -0.72251000 | -1.26292200 | 2.98155700  |
| C | -1 | -1.42313000 | -2.49251600 | 2.75856100  |
| C | -1 | -0.82790700 | -3.28954400 | 5.00067200  |
| C | -1 | -0.18959600 | -2.04969500 | 5.22943700  |
| C | -1 | -0.13900900 | -1.06646600 | 4.25674100  |
| C | -1 | 2.66244600  | 1.92408200  | 2.85820600  |
| C | 0  | 6.05469600  | 0.17542700  | 0.36922700  |
| C | 0  | 1.59105200  | -2.70927500 | 0.72147200  |
| C | 0  | 2.71853600  | -3.70313900 | 0.47739500  |
| C | 0  | 4.75311400  | -4.02750900 | -0.88373800 |
| C | 0  | 5.74625200  | -4.06365500 | 0.27229600  |
| H | -1 | 0.82694100  | -1.51664600 | -4.26846300 |
| H | -1 | 4.48965700  | 1.08327800  | -2.16694700 |
| H | -1 | -3.01223900 | 4.13812200  | 0.58096100  |
| H | -1 | -3.79894100 | 2.38563000  | -1.27994400 |
| H | -1 | 0.26742500  | -1.86026800 | 6.20292800  |
| H | -1 | 0.36123500  | -0.11379900 | 4.43923800  |
| H | 0  | 0.95417400  | -3.05009800 | 1.54044300  |
| H | 0  | 2.28736300  | -4.69059400 | 0.23691900  |
| H | 0  | 0.96130700  | -2.63840100 | -0.17028500 |
| H | 0  | 2.95237300  | -1.26286900 | 0.46403800  |
| H | 0  | 3.29519500  | -3.82331100 | 1.40165000  |
| H | 0  | 2.44118300  | -1.35973100 | 1.99763500  |
| H | 0  | 5.77014400  | -2.45780400 | -1.97201200 |
| H | 0  | 6.63861800  | -4.62737100 | -0.01588000 |
| H | 0  | 5.33091900  | -4.54248900 | 1.16354700  |
| H | 0  | 6.05049800  | -3.04679400 | 0.54216200  |
| N | 0  | 2.10823900  | -1.36663500 | 1.03416000  |
| N | 0  | 3.59827000  | -3.18697800 | -0.56054700 |
| H | 0  | 2.96481700  | -1.17556600 | -5.53425600 |
| H | -1 | 4.80511300  | 0.12527200  | -4.43083900 |
| H | -1 | -1.39987200 | 8.11085600  | 0.17435200  |
| O | -1 | 3.96425600  | 3.38502300  | -1.10902900 |
| H | 0  | 4.16714900  | 4.24809800  | -0.73232100 |
| C | -1 | 0.02223800  | 6.51050300  | 0.22480100  |
| H | 0  | 3.10287600  | 2.19125200  | 3.82862700  |
| H | -1 | 0.89215400  | 7.16084100  | 0.12206800  |
| H | 0  | -2.38211000 | -4.59790800 | 2.03528200  |
| H | 0  | -6.34285500 | -3.61534100 | -0.81939700 |

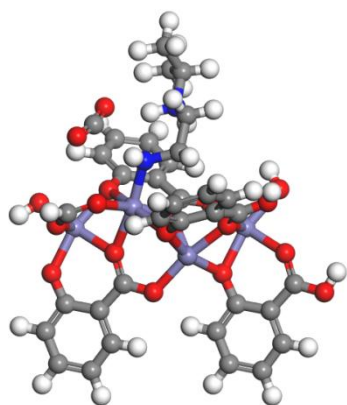

Fe-(C) TS<sub>1</sub>

-1 1

|    |             |             |             |
|----|-------------|-------------|-------------|
| H  | -8.05331100 | 1.24201800  | -1.20905400 |
| Fe | -2.15242200 | -2.14828500 | -1.48033900 |
| O  | -1.81061400 | -4.13218000 | -1.84260100 |
| O  | -3.00796900 | -0.31684400 | -1.11429200 |
| O  | -3.99588500 | -2.86432500 | -0.86849400 |
| O  | -6.21080600 | -3.12123000 | -0.77054300 |
| O  | -1.75928100 | -2.00261300 | 0.62225800  |
| O  | -2.12740400 | -4.01428800 | 1.51564600  |
| H  | -0.94514500 | -4.21585300 | -2.25888700 |
| C  | -4.30579900 | 0.02703900  | -1.16031800 |
| C  | -5.37852500 | -0.90874900 | -1.04278500 |
| C  | -6.70440400 | -0.44184600 | -1.05498300 |
| C  | -7.02297900 | 0.90522000  | -1.20569400 |
| C  | -5.95377200 | 1.81288200  | -1.36417200 |
| C  | -5.18391000 | -2.36765400 | -0.88108300 |
| C  | -1.16143400 | -3.24749200 | 3.98278100  |
| C  | -1.72908300 | -2.81297300 | 1.62746500  |
| H  | -0.57781500 | -3.66992000 | 6.02219200  |
| C  | 4.71958000  | -3.60619200 | -2.61298200 |
| H  | -7.49125500 | -1.18228700 | -0.90798100 |
| H  | -1.56338900 | -4.24281900 | 3.78961800  |
| H  | 2.55446400  | -2.96601300 | -1.34654800 |
| H  | 3.67266100  | -5.05261000 | -1.40987000 |
| H  | 3.87741700  | -3.39536000 | -3.27839600 |
| H  | 5.35546300  | -4.35182600 | -3.09578100 |
| H  | -3.77461500 | 6.44047900  | -0.00415200 |
| H  | -6.17225200 | 2.87087000  | -1.52428000 |
| Fe | 2.12659300  | 3.04877500  | -0.27343500 |
| Fe | -1.67161500 | 0.06763800  | 0.44888800  |
| Fe | 1.21176300  | 0.49625300  | 0.84532800  |
| O  | 2.44236800  | 1.08483000  | -0.66258900 |
| O  | 0.09206000  | -0.26682400 | -0.60710800 |
| O  | -0.43505300 | -1.49768900 | -2.39297900 |
| O  | 1.27104600  | 4.88021600  | 0.09261200  |

|   |             |             |             |
|---|-------------|-------------|-------------|
| O | 0.28643000  | 2.33529400  | 0.31971000  |
| O | -1.93178900 | 2.07583000  | 0.43636100  |
| O | -0.51082300 | -0.13935900 | 2.09753300  |
| O | 2.51973500  | 3.19444700  | 1.82916200  |
| O | 2.09317200  | 1.21391100  | 2.75184900  |
| O | 4.74165400  | 0.30921400  | 1.77655900  |
| O | 5.06401000  | -0.98233400 | -0.12846200 |
| C | 2.63963400  | 0.47562600  | -1.82781300 |
| C | 1.68649500  | -0.41289700 | -2.41373500 |
| C | 1.94877600  | -0.97971600 | -3.67222700 |
| C | 3.12713500  | -0.73392100 | -4.37104000 |
| C | 4.06872100  | 0.13145400  | -3.77141900 |
| C | 3.83248800  | 0.72360900  | -2.54494000 |
| C | 0.40682900  | -0.76792900 | -1.77221700 |
| C | -0.02678300 | 5.22410000  | 0.04658600  |
| C | -1.09950900 | 4.28831200  | 0.16412000  |
| C | -2.42538900 | 4.75521400  | 0.15192000  |
| C | -2.74402600 | 6.10220400  | 0.00119300  |
| C | -1.67475600 | 7.00994200  | -0.15726700 |
| C | -4.63555300 | 1.39038600  | -1.34319700 |
| C | -0.90495700 | 2.82933000  | 0.32580400  |
| C | -0.58757200 | -1.04032800 | 3.07993200  |
| C | -1.18738900 | -2.33127800 | 2.91812200  |
| C | -0.59420100 | -2.94397200 | 5.21797700  |
| C | -0.05741600 | -1.64726200 | 5.38352300  |
| C | -0.05493200 | -0.72332800 | 4.35310000  |
| C | 2.54986900  | 2.38401100  | 2.83435100  |
| C | 4.74114400  | -0.37424900 | 0.83042800  |
| C | 1.70177600  | -2.40274600 | 1.04047600  |
| C | 2.67061900  | -3.50867500 | 0.63434900  |
| C | 4.25896300  | -4.13912700 | -1.26688000 |
| C | 5.41727300  | -4.41188300 | -0.32249300 |
| H | 1.17048000  | -1.60983300 | -4.10428200 |
| H | 4.56948900  | 1.38526500  | -2.08754800 |
| H | -3.21224000 | 4.01477300  | 0.29892300  |
| H | -3.81456600 | 2.09832300  | -1.46672800 |
| H | 0.35777000  | -1.36510300 | 6.35328800  |
| H | 0.36709100  | 0.27418600  | 4.48722300  |
| H | 1.22240300  | -2.76215600 | 1.96494700  |
| H | 2.17709500  | -4.47728300 | 0.51010900  |
| H | 0.89968000  | -2.37703400 | 0.29022900  |
| H | 3.76015400  | -2.23406100 | -0.52134300 |
| H | 3.47660900  | -3.60633800 | 1.36414800  |
| H | 2.64264000  | -1.01692100 | 2.12014000  |
| H | 5.30057800  | -2.68649600 | -2.49332900 |
| H | 6.11676400  | -5.08806600 | -0.81988300 |

|   |             |             |             |
|---|-------------|-------------|-------------|
| H | 5.09794800  | -4.89313100 | 0.60433000  |
| H | 5.95278200  | -3.48956600 | -0.07876900 |
| N | 2.31846300  | -1.09519000 | 1.15791500  |
| N | 3.29859200  | -3.14806300 | -0.66726400 |
| H | 3.30901200  | -1.18118600 | -5.34195300 |
| H | 5.01666200  | 0.31997500  | -4.27992200 |
| H | -1.89323700 | 8.06793000  | -0.31737700 |
| O | 3.84396300  | 3.69937000  | -1.18607500 |
| H | 3.96872800  | 4.59974000  | -0.86685200 |
| C | -0.35653700 | 6.58744600  | -0.13629200 |
| H | 2.95944300  | 2.75150800  | 3.78761000  |
| H | 0.46438700  | 7.29530700  | -0.25984100 |
| H | -1.97410400 | -4.53704100 | 2.31173000  |
| H | -5.91021500 | -4.04130900 | -0.68968900 |

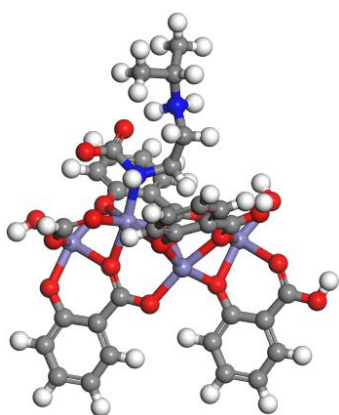

Fe-(D) Intermediate from Gaussian

-1 1

|    |             |             |             |
|----|-------------|-------------|-------------|
| H  | -8.07655900 | -1.70709000 | -0.21104600 |
| Fe | -1.47635300 | -2.58134200 | -1.64660000 |
| O  | -0.50245900 | -4.25350200 | -2.30941100 |
| O  | -2.86585700 | -1.24439100 | -0.93810400 |
| O  | -2.80927800 | -3.98709000 | -0.91680100 |
| O  | -4.73298600 | -5.06941400 | -0.58605800 |
| O  | -0.82682600 | -2.46362000 | 0.39324100  |
| O  | -0.29044700 | -4.52862100 | 1.04788500  |
| H  | 0.25774500  | -3.97477000 | -2.83256700 |
| C  | -4.18904600 | -1.41440400 | -0.77997900 |
| C  | -4.81527600 | -2.69249300 | -0.65924100 |
| C  | -6.20330000 | -2.76230300 | -0.44800600 |
| C  | -7.00838000 | -1.62842200 | -0.37763900 |
| C  | -6.38183600 | -0.37438800 | -0.54198100 |
| C  | -4.08163900 | -3.97727700 | -0.71869900 |
| C  | 0.71888100  | -3.65001000 | 3.45975800  |
| C  | -0.34213200 | -3.27870000 | 1.27002600  |
| H  | 1.73950600  | -3.97912900 | 5.33797800  |
| C  | 6.95780600  | -3.16864000 | -1.22798300 |
| H  | -6.63318500 | -3.75441000 | -0.30687000 |

|    |             |             |             |
|----|-------------|-------------|-------------|
| H  | 0.67936000  | -4.70491000 | 3.18556700  |
| H  | 4.49064700  | -2.90674100 | -1.31820500 |
| H  | 5.90103800  | -3.82576100 | 0.52669200  |
| H  | 6.50574900  | -3.92298700 | -1.87937400 |
| H  | 7.93082000  | -3.54541400 | -0.90464600 |
| H  | -5.83804900 | 4.61055500  | 1.14956600  |
| H  | -6.99180800 | 0.53144500  | -0.53161700 |
| Fe | 0.76310100  | 3.73571600  | -0.28438100 |
| Fe | -1.52487300 | -0.50726900 | 0.48864500  |
| Fe | 0.99694000  | 0.99361200  | 0.59282800  |
| O  | 1.70668100  | 2.06858600  | -0.95583600 |
| O  | 0.05162900  | -0.06877600 | -0.80102200 |
| O  | -0.28428700 | -1.25999500 | -2.66570000 |
| O  | -0.62640300 | 5.07266700  | 0.42411500  |
| O  | -0.56571100 | 2.33294700  | 0.42865000  |
| O  | -2.49353000 | 1.24764500  | 0.77616100  |
| O  | -0.08765700 | -0.38693200 | 1.92046600  |
| O  | 1.41262800  | 3.85343900  | 1.75546000  |
| O  | 1.83256500  | 1.78996100  | 2.45455500  |
| O  | 4.32274500  | 1.51395600  | 0.93480900  |
| O  | 4.45534700  | 0.12038800  | -0.82091700 |
| C  | 1.91407900  | 1.67853000  | -2.21922800 |
| C  | 1.26620800  | 0.54457600  | -2.79859100 |
| C  | 1.50793800  | 0.21989600  | -4.14396300 |
| C  | 2.38677700  | 0.94720200  | -4.94143000 |
| C  | 3.03466100  | 2.05435900  | -4.35028400 |
| C  | 2.80245400  | 2.41477600  | -3.03617500 |
| C  | 0.32468000  | -0.31729600 | -2.05978100 |
| C  | -1.94959100 | 4.90265500  | 0.58224000  |
| C  | -2.57582200 | 3.62456600  | 0.70297900  |
| C  | -3.96384600 | 3.55475600  | 0.91421200  |
| C  | -4.76895800 | 4.68854300  | 0.98456100  |
| C  | -4.14238100 | 5.94267100  | 0.82024000  |
| C  | -5.01551200 | -0.26720500 | -0.73772100 |
| C  | -1.84221700 | 2.33968900  | 0.64350100  |
| C  | 0.29892700  | -1.32614100 | 2.79696200  |
| C  | 0.19005800  | -2.73101300 | 2.53812300  |
| C  | 1.33007900  | -3.25264900 | 4.64640400  |
| C  | 1.37962000  | -1.86659600 | 4.91733400  |
| C  | 0.87965900  | -0.93241500 | 4.02695500  |
| C  | 1.89728900  | 3.03826600  | 2.63222500  |
| C  | 3.93597400  | 0.58061000  | 0.24030500  |
| C  | 2.54078600  | -1.48247300 | 0.16216500  |
| C  | 3.63739600  | -2.48702200 | 0.50193500  |
| C  | 6.09258300  | -2.89008900 | -0.01011100 |
| C  | 6.72339900  | -1.86979100 | 0.92381200  |

|   |             |             |             |
|---|-------------|-------------|-------------|
| H | 0.95186300  | -0.62168400 | -4.55867700 |
| H | 3.31331500  | 3.26783800  | -2.58731700 |
| H | -4.39373100 | 2.56264900  | 1.05535000  |
| H | -4.53870500 | 0.70598500  | -0.86425500 |
| H | 1.81590500  | -1.52557000 | 5.85850000  |
| H | 0.92721500  | 0.13673400  | 4.24093200  |
| H | 1.58932500  | -1.85567700 | 0.53041700  |
| H | 3.25022400  | -3.50783400 | 0.47961600  |
| H | 2.44551800  | -1.39606800 | -0.92246900 |
| H | 4.77955200  | -1.33698100 | -0.74471800 |
| H | 4.03909100  | -2.30403100 | 1.50131100  |
| H | 2.78468400  | -0.16001000 | 1.72290100  |
| H | 7.12348700  | -2.25595500 | -1.80924300 |
| H | 7.68727500  | -2.25047500 | 1.26944500  |
| H | 6.11216300  | -1.67465600 | 1.80900000  |
| H | 6.89246300  | -0.92242000 | 0.40304400  |
| N | 2.71123900  | -0.12984700 | 0.70561400  |
| N | 4.75801900  | -2.39338200 | -0.47757500 |
| H | 2.55998700  | 0.67849500  | -5.97745900 |
| H | 3.75370600  | 2.62673100  | -4.94026100 |
| H | -4.75235400 | 6.84850400  | 0.83060100  |
| O | 1.95516800  | 5.05706300  | -1.30348100 |
| H | 1.79860100  | 5.90599000  | -0.87580600 |
| C | -2.77605700 | 6.04985300  | 0.62450000  |
| H | 2.33019900  | 3.44443200  | 3.55673200  |
| H | -2.29928300 | 7.02295100  | 0.49794500  |
| H | 0.17142700  | -5.01867200 | 1.73884800  |
| H | -4.11135200 | -5.81131700 | -0.66763200 |

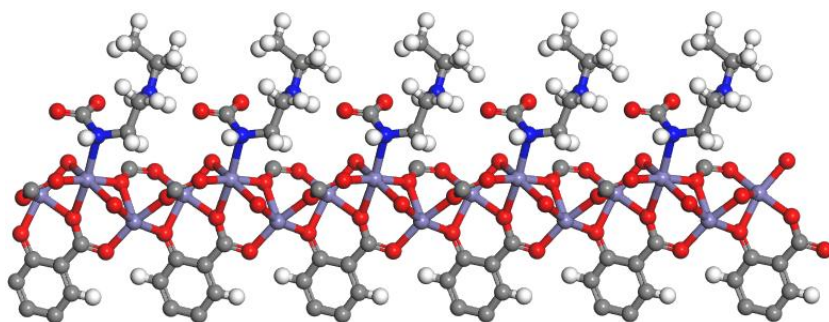

Fe-(D) Intermediate from VASP

1.00000000000000

|                      |                     |                     |
|----------------------|---------------------|---------------------|
| 21.2362935355011899  | 0.0310546435970045  | -0.0047260941620644 |
| -11.2626411671047446 | 19.1158319038748914 | -0.0064664215974189 |
| -0.0070686423974531  | -0.0083177970588644 | 6.8392722185187287  |

Fe O C H N

6 20 48 32 2

Direct

|                    |                    |                    |
|--------------------|--------------------|--------------------|
| 0.3290822806074438 | 0.7412410592404978 | 0.8427175581071372 |
| 0.2665616034924501 | 0.6449025426275533 | 0.1821857291225244 |

|                    |                    |                    |
|--------------------|--------------------|--------------------|
| 0.3782112066418120 | 0.6853810332495235 | 0.5076358418656410 |
| 0.6952652560289911 | 0.3555479530315753 | 0.2247819226003155 |
| 0.5920083664939655 | 0.2917124964211041 | 0.8912697029580640 |
| 0.6290612247565213 | 0.3899800199415340 | 0.5581705555173631 |
| 0.4126294077308446 | 0.7824264529349130 | 0.6446540184992009 |
| 0.3621319858892616 | 0.7378882502631999 | 0.2777643829739916 |
| 0.3833724610714266 | 0.8176447653861758 | 0.0489784878560271 |
| 0.2288964524710818 | 0.6892616115402683 | 0.9768579021064275 |
| 0.2728232977689034 | 0.6763362023291779 | 0.6099149318932410 |
| 0.1870993587190157 | 0.6226885155054911 | 0.3808128055306070 |
| 0.3181219494961033 | 0.5982701724301782 | 0.3106558677202022 |
| 0.3327490940622287 | 0.6521717223942226 | 0.9489015226229659 |
| 0.3822560635802815 | 0.6192546163948917 | 0.7148651762973460 |
| 0.5558122062860158 | 0.7661709456216735 | 0.7104390359295328 |
| 0.5707620227832803 | 0.8319133194015057 | 0.4400140519977642 |
| 0.7303513004104740 | 0.4370907860055113 | 0.4262660705981500 |
| 0.6876029329769842 | 0.3849217623516673 | 0.7929036397775558 |
| 0.7730872500354257 | 0.4114612512274425 | 0.0207156283148682 |
| 0.6424757946448332 | 0.2585989327201065 | 0.0924618985835839 |
| 0.6300927951424288 | 0.2991678300510129 | 0.4586828302442122 |
| 0.5718053071241963 | 0.2174462251497149 | 0.6863049035633277 |
| 0.5432789370183417 | 0.3418384566651098 | 0.7587589727576650 |
| 0.5980290396501222 | 0.3532945377812088 | 0.1260384223201055 |
| 0.5725981069951070 | 0.4101819140745001 | 0.3528413453482139 |
| 0.4445671930474330 | 0.8462832006167897 | 0.5643899145264426 |
| 0.4366100439351996 | 0.8586574080127466 | 0.3633569297599807 |
| 0.4719076630296476 | 0.9274919030265846 | 0.2922220627360600 |
| 0.5162769612069090 | 0.9849424015523465 | 0.4096194911854046 |
| 0.5244824477109700 | 0.9718611568357817 | 0.6073768131699889 |
| 0.4895477363314368 | 0.9048908431945035 | 0.6828899548731792 |
| 0.3918818484107718 | 0.8024140034542984 | 0.2230832905577766 |
| 0.1622100602901286 | 0.6584686037397390 | 0.8948009180252408 |
| 0.1480832556122286 | 0.6360322764028955 | 0.6956259222848727 |
| 0.0758796949011749 | 0.6020017229444694 | 0.6255203711592667 |
| 0.0170021926284744 | 0.5903294676602524 | 0.7418884883615368 |
| 0.0320962006389761 | 0.6148064786004458 | 0.9365875058222430 |
| 0.1024213817237183 | 0.6478816447762564 | 0.0111375309858058 |
| 0.2054622170027370 | 0.6452651643924286 | 0.5557462077145346 |
| 0.3402889781953248 | 0.5579310187969356 | 0.2261854502715105 |
| 0.3594363282906344 | 0.5622895852843653 | 0.0238061449235417 |
| 0.3876820820983452 | 0.5214471363957295 | 0.9518483651109272 |
| 0.3966942463865824 | 0.4750854349682926 | 0.0692491470835477 |
| 0.3746581715751300 | 0.4690466031784574 | 0.2665886276736815 |
| 0.3472244386094610 | 0.5089064823080821 | 0.3428804115390869 |
| 0.3577979695372103 | 0.6132876226905648 | 0.8875477613660629 |
| 0.5453356164920526 | 0.7754005284438563 | 0.5344167710957006 |



|                    |                    |                    |
|--------------------|--------------------|--------------------|
| 0.5054350929300354 | 0.7055184183272317 | 0.2170616792829536 |
| 0.5835630496951497 | 0.7471533081042177 | 0.1371042101988900 |
| 0.7968314610063848 | 0.4737571068649061 | 0.5093276236972294 |
| 0.8116530245313834 | 0.4664919057672078 | 0.7092679480312286 |
| 0.8836759928052140 | 0.5051575340300668 | 0.7802054655422090 |
| 0.9416860679056327 | 0.5521608078382640 | 0.6641468252493269 |
| 0.9257943913265936 | 0.5603945377102179 | 0.4687991012807992 |
| 0.8557440697428585 | 0.5224493659899702 | 0.3933158737009474 |
| 0.7552535894709755 | 0.4187177959380493 | 0.8478845507766135 |
| 0.6143235957520723 | 0.1951540145004970 | 0.1756942086500085 |
| 0.5912548483090305 | 0.1808175369000975 | 0.3751024325965472 |
| 0.5595792540446011 | 0.1120599271715884 | 0.4459910320247108 |
| 0.5514775998162812 | 0.0567462866298920 | 0.3309608958169992 |
| 0.5768827482909012 | 0.0721897086967055 | 0.1363817212730676 |
| 0.6071037691944104 | 0.1390489880997797 | 0.0605851730673565 |
| 0.5975113378000494 | 0.2345635826711600 | 0.5136748988370791 |
| 0.5073693869819947 | 0.3708634215676486 | 0.8406884830562072 |
| 0.5162262801256174 | 0.3933191706104063 | 0.0399949746604984 |
| 0.4789631015744014 | 0.4263794979954709 | 0.1091721542781536 |
| 0.4316051066834121 | 0.4368473212909107 | 0.9923856281672010 |
| 0.4210733271282168 | 0.4118858363896811 | 0.7981397138255517 |
| 0.4577375204855288 | 0.3800274072071368 | 0.7242403001990199 |
| 0.5645646671197027 | 0.3855847486956984 | 0.1799457892185717 |
| 0.6755167532260143 | 0.8711470795711508 | 0.0172341919074764 |
| 0.6729297424630943 | 0.9335156231882683 | 0.9321798897916678 |
| 0.7272240590734316 | 0.8907135830541094 | 0.1913531733006566 |
| 0.4619785328701188 | 0.9346575029930692 | 0.1398454340643387 |
| 0.5602792043547027 | 0.0156769446098010 | 0.7021655688143791 |
| 0.4965461413700649 | 0.8953363573968192 | 0.8356190319744082 |
| 0.0671225965317918 | 0.5831918983603848 | 0.4749857487344182 |
| 0.9873581592637416 | 0.6082960698366764 | 0.0298240484360851 |
| 0.1136448992683646 | 0.6666720608268200 | 0.1617945046452613 |
| 0.4052755004927370 | 0.5293624578602473 | 0.7995925401637052 |
| 0.3789584730360423 | 0.4315853218486379 | 0.3608647564168303 |
| 0.3306350651076409 | 0.5041583054553481 | 0.4956975009726963 |
| 0.4836182830139400 | 0.6500285147675824 | 0.1850394242036196 |
| 0.5894502171442020 | 0.7211351578547621 | 0.0079900275038827 |
| 0.8930956400005109 | 0.4958143796269960 | 0.9310548497987881 |
| 0.9698018671603397 | 0.5982182616621756 | 0.3755684054714939 |
| 0.8441873046890160 | 0.5292118791432709 | 0.2419930920903202 |
| 0.5397848767261334 | 0.1030135820163041 | 0.5962565111421368 |
| 0.5732344236134560 | 0.0304263837975035 | 0.0436503770580774 |
| 0.6264027875985260 | 0.1502191503447249 | 0.9098401957362163 |
| 0.4899721109031298 | 0.4454551564344382 | 0.2594803786786209 |
| 0.3824254957250808 | 0.4171288180889717 | 0.7044898818678752 |
| 0.4491856544468497 | 0.3610340294554995 | 0.5738050015192331 |

|                    |                    |                    |
|--------------------|--------------------|--------------------|
| 0.4707019519225039 | 0.7204192085147594 | 0.1348661966401145 |
| 0.5677224652394369 | 0.8084089269731546 | 0.9444536734925449 |
| 0.5814480756757220 | 0.8353721511512382 | 0.1956784986060786 |
| 0.6236208258756969 | 0.7535984737837140 | 0.2487131833415646 |
| 0.4941322583627843 | 0.6702420445885388 | 0.5043009523706932 |
| 0.6905486016821819 | 0.8463946437643752 | 0.9008242220402767 |
| 0.6545164183378323 | 0.9571804064550926 | 0.0431586013091211 |
| 0.6362592990322257 | 0.9177638087886428 | 0.8048612653895312 |
| 0.7277021218927269 | 0.9736163111641275 | 0.8843251934420031 |
| 0.7818631593655444 | 0.9323910610396248 | 0.1477152017332380 |
| 0.7323744641537990 | 0.8466086710590564 | 0.2434494945404011 |
| 0.7084200290755964 | 0.9096354512973307 | 0.3140762043777429 |
| 0.4955241965637827 | 0.7106584432430154 | 0.4290322043215425 |
| 0.5984667164886769 | 0.8176393469713865 | 0.0731887773393679 |

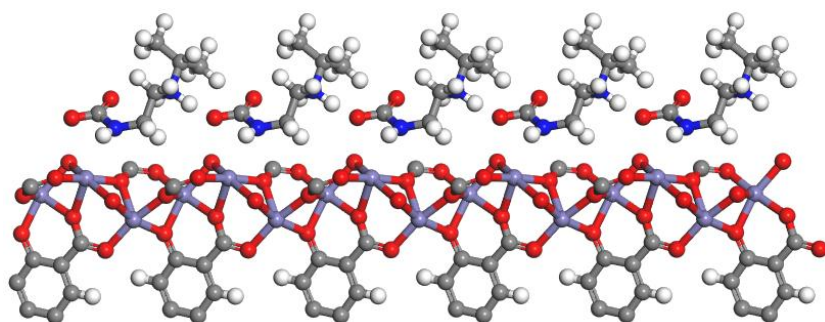

Fe-(E) TS<sub>2</sub>

|                      |                     |                    |
|----------------------|---------------------|--------------------|
| 1.0000000000000000   |                     |                    |
| 21.1206009657041420  | 0.0000000000000000  | 0.0000000000000000 |
| -11.2728789833120526 | 19.0582407609850222 | 0.0000000000000000 |
| -0.0044529817822443  | 0.0110993518763934  | 6.8207199340229545 |

| Fe | O  | C  | H  | N |
|----|----|----|----|---|
| 6  | 20 | 48 | 32 | 2 |

Direct

|                    |                    |                    |
|--------------------|--------------------|--------------------|
| 0.3320610173675129 | 0.7447694639392866 | 0.8350399506938465 |
| 0.2668799515667225 | 0.6483100466339813 | 0.1720799135540966 |
| 0.3754872247612910 | 0.6847504247072461 | 0.5013252640930085 |
| 0.6943451328588772 | 0.3588170240649831 | 0.2225951497060824 |
| 0.5907420424196309 | 0.2917752771142261 | 0.8886162863566528 |
| 0.6253702003132187 | 0.3900664522046577 | 0.5553730299890566 |
| 0.4163272862620195 | 0.7828411877206967 | 0.6361109740463914 |
| 0.3659904527014295 | 0.7394490518570516 | 0.2683081645663810 |
| 0.3906548072759967 | 0.8204596434504559 | 0.0392323768361527 |
| 0.2307707861000389 | 0.6953326027890021 | 0.9684708566350865 |
| 0.2739192902477152 | 0.6814737130329207 | 0.6006976383335541 |
| 0.1874234211807618 | 0.6278827695993693 | 0.3719268902549407 |
| 0.3160213800694162 | 0.5991547242365468 | 0.3009437693929040 |
| 0.3307118467731276 | 0.6523697214923783 | 0.9366576319977006 |
| 0.3764273911473441 | 0.6158979392216553 | 0.7002408555213522 |
| 0.5330881461757058 | 0.7445817275029777 | 0.5937564460550880 |

|                    |                    |                    |
|--------------------|--------------------|--------------------|
| 0.5826912364869240 | 0.8194335290157851 | 0.3312540006815131 |
| 0.7277335502957802 | 0.4407634281808523 | 0.4231371962422424 |
| 0.6853586994131531 | 0.3882012750315059 | 0.7917383033141258 |
| 0.7721115048661469 | 0.4165755740496628 | 0.0186514338134657 |
| 0.6446412533925737 | 0.2618256811046501 | 0.0894886437074480 |
| 0.6308660704000724 | 0.3008619033391179 | 0.4580421307900928 |
| 0.5730399037290977 | 0.2177133932106103 | 0.6846425699274277 |
| 0.5384444032462203 | 0.3386512811797961 | 0.7553307937717890 |
| 0.5936356787111204 | 0.3514535301111326 | 0.1246341498468589 |
| 0.5664960115865940 | 0.4076319687429696 | 0.3499965296745950 |
| 0.4505789956188412 | 0.8471348208852969 | 0.5562513031107896 |
| 0.4443584141762150 | 0.8602932840165166 | 0.3541534416254578 |
| 0.4801439987552374 | 0.9295878386659269 | 0.2840373601521409 |
| 0.5233244054510888 | 0.9870367375809700 | 0.4037057239485525 |
| 0.5302277586621988 | 0.9732609723611820 | 0.6022225430845937 |
| 0.4950216322565469 | 0.9056970552870205 | 0.6765354303591485 |
| 0.3984762400831863 | 0.8044068906758924 | 0.2135902448565697 |
| 0.1635435339044868 | 0.6648727002244226 | 0.8868096661817148 |
| 0.1487826898388319 | 0.6421868872200637 | 0.6874603121566329 |
| 0.0759622569347655 | 0.6082673603689265 | 0.6181287766832296 |
| 0.0169228362451515 | 0.5968496084044934 | 0.7354256044057745 |
| 0.0326438569640871 | 0.6216763732197017 | 0.9301414038846625 |
| 0.1035955612535828 | 0.6547021241019112 | 0.0038685033232260 |
| 0.2060205146568125 | 0.6506940990897635 | 0.5467994083756141 |
| 0.3369534614760851 | 0.5576956934350086 | 0.2166201458146298 |
| 0.3546372068839702 | 0.5605111014809341 | 0.0129946171452061 |
| 0.3813791661324597 | 0.5181993961631043 | 0.9411806942183025 |
| 0.3901051331128487 | 0.4718032545050337 | 0.0602312612564818 |
| 0.3688175250975531 | 0.4668940687162300 | 0.2587780809758894 |
| 0.3430094810703213 | 0.5082089044608717 | 0.3347799264177562 |
| 0.3535028850634875 | 0.6115283795996024 | 0.8749793852196680 |
| 0.5444926717377226 | 0.7598877846290750 | 0.4097259276264127 |
| 0.5202927426906375 | 0.6998580752992930 | 0.0782006777035668 |
| 0.5992834915959808 | 0.7498124871711838 | 0.0059440622535852 |
| 0.7947132059904893 | 0.4783964774522544 | 0.5054086569890889 |
| 0.8100362320723792 | 0.4715303271997389 | 0.7057566445347869 |
| 0.8826485629991403 | 0.5109269020302316 | 0.7760368081006601 |
| 0.9408689086138790 | 0.5583275136984210 | 0.6587784542112972 |
| 0.9244572622381489 | 0.5663242051915306 | 0.4630851592647329 |
| 0.8538223378061117 | 0.5277116032184572 | 0.3883484488575961 |
| 0.7536196936776169 | 0.4232004115401236 | 0.8454468896313843 |
| 0.6181303620148229 | 0.1982974405106089 | 0.1726534370967359 |
| 0.5947011913898622 | 0.1829524456211448 | 0.3724436890128305 |
| 0.5642740817231866 | 0.1138828067027987 | 0.4426378014014240 |
| 0.5579571912014907 | 0.0593842766116406 | 0.3266272046784693 |
| 0.5841140184771471 | 0.0760111894740235 | 0.1320715193248323 |

|                    |                    |                     |
|--------------------|--------------------|---------------------|
| 0.6130118467191412 | 0.1431071794248659 | 0.0568559968875507  |
| 0.5992149792200180 | 0.2358335273797103 | 0.5119006045746205  |
| 0.5014391002948702 | 0.3669162944133956 | 0.8365376555448870  |
| 0.5099542407382335 | 0.3896443971282015 | 0.0358932187015819  |
| 0.4721513418246497 | 0.4225988779271047 | 0.1034302561279990  |
| 0.4246132037129297 | 0.4327694675002205 | 0.9850768496086132  |
| 0.4140365738447837 | 0.4071097768655339 | 0.7912472991047091  |
| 0.4511380851090294 | 0.3752338149414048 | 0.7189893581201571  |
| 0.5589204653017338 | 0.3828886664268443 | 0.1770788258869270  |
| 0.6783231000547043 | 0.8696114424889470 | 0.8432978257812699  |
| 0.6683207648262215 | 0.9222280816933269 | 0.7224744255528728  |
| 0.7306401915964297 | 0.9036939776763395 | 0.0155832041009408  |
| 0.4710506464141405 | 0.9371922647342485 | 0.1309106663948651  |
| 0.5650213180669815 | 0.0170681761898047 | 0.6990173207989130  |
| 0.5005701860134179 | 0.8959079984642622 | 0.8305900925563838  |
| 0.0668813392400858 | 0.5892426150825195 | 0.4675260097666510  |
| 0.9878630588721643 | 0.6154053655130546 | 0.0242735644007746  |
| 0.1151509132748778 | 0.6736333803593487 | 0.1546427931423019  |
| 0.3984699317932232 | 0.5253892416797665 | 0.7879473177656446  |
| 0.3724854431464090 | 0.4291487618842096 | 0.3542105638978150  |
| 0.3270643164280073 | 0.5043392145128273 | 0.4884534284658127  |
| 0.5055452906926294 | 0.6459918415730757 | 0.0425911244778024  |
| 0.6143047338755457 | 0.7241899053086801 | 0.8930388899218263  |
| 0.8923568962421655 | 0.5017243645676901 | 0.9272376901304862  |
| 0.9685673219075805 | 0.6044725251457299 | 0.3688272633070622  |
| 0.8419917521162050 | 0.5343026038046191 | 0.2366818457743909  |
| 0.5439201227670526 | 0.1039142950662161 | 0.5930117804148125  |
| 0.5821143700886224 | 0.0350028275846018 | 0.0389476745008900  |
| 0.6327591126919571 | 0.1552070583317707 | 0.9060060799067183  |
| 0.4831139640768429 | 0.4420828341336117 | 0.2535946303813004  |
| 0.3751608396175295 | 0.4119693254283817 | 0.6964416965259295  |
| 0.4426789816402152 | 0.3558971069981183 | 0.5686674286282697  |
| 0.4829455538512294 | 0.7103334518714842 | -0.0097559248388040 |
| 0.5696379774895298 | 0.7926923133564087 | 0.7789920909562197  |
| 0.5830639408514328 | 0.8326850964905548 | 0.0141474357856155  |
| 0.6386666970168680 | 0.7669280046277510 | 0.1268052849965011  |
| 0.4880491478355137 | 0.6543706671673835 | 0.3584483152893743  |
| 0.6979772400600026 | 0.8427731797220988 | 0.7463744259918201  |
| 0.6481627820728272 | 0.9496189074140974 | 0.8148415077894187  |
| 0.6300772084149689 | 0.8964967945216261 | 0.5998925121042135  |
| 0.7215753258420734 | 0.9618913551169820 | 0.6608649709223028  |
| 0.7834533013613364 | 0.9464671859087420 | 0.9605950223517620  |
| 0.7413595235367942 | 0.8668520405540634 | 0.0959280729305178  |
| 0.7081610561048111 | 0.9258140071034190 | 0.1199336418854871  |
| 0.5064864566458225 | 0.7006861560941949 | 0.2874895568287745  |
| 0.6034724313727228 | 0.8126712040807220 | 0.9109252825433253  |

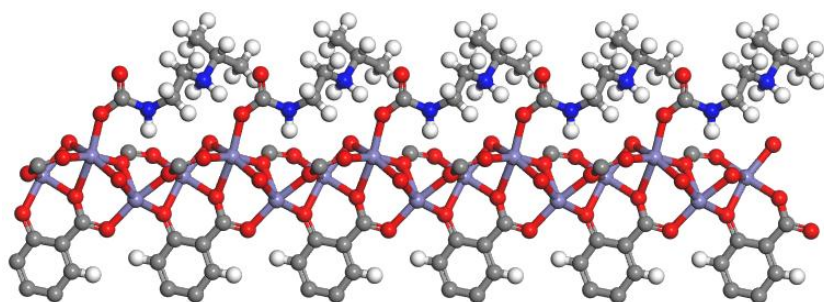

Fe-(F) Product

```

1.000000000000000
 20.6287573539005145  -0.2489704919655566   0.1024997437218161
-11.3315511499144836  19.1939625472962909   0.0193638588892802
 -0.0534633275135524  -0.0048406011374229   6.8374553640468916

```

```

Fe  O  C  H  N
 6  20 48 32  2

```

Direct

```

0.3442584725817331  0.7500348874059650  0.8197464921181159
0.2720268330199145  0.6545728859815673  0.1604313289097670
0.3892569482151479  0.6878698359485431  0.4789165062856773
0.6927503189000256  0.3618404439289345  0.2183495588955954
0.5871714126114176  0.2899453346166280  0.8839169293235486
0.6174811250494303  0.3867286058230868  0.5508603289897684
0.4343904949914384  0.7872586799193382  0.6271499000186104
0.3760504284464133  0.7445361648128992  0.2558187114017067
0.4057565101405803  0.8262405972732014  0.0269255192756432
0.2403710742137231  0.7044332004010250  0.9559137210927721
0.2833392890669633  0.6902967586593779  0.5854763695390496
0.1923175208029882  0.6378621794227730  0.3608295717324810
0.3177504339920100  0.6020607632389438  0.2859220373100697
0.3394551128028031  0.6580967241202791  0.9274157168033009
0.3764118185237849  0.6149606088451062  0.6868596790449200
0.5025429383078335  0.7195632481048461  0.4113056072529151
0.6078818974294299  0.7283287080119361  0.2817245556396252
0.7224724670163707  0.4425840717626516  0.4186423355620950
0.6809634719443080  0.3891876959390532  0.7873953678538667
0.7711616969549639  0.4227260413179867  0.0140502287097464
0.6466970113605951  0.2648505896634627  0.0864739940982741
0.6300533316152143  0.3015494173951035  0.4545270025083928
0.5740977793064688  0.2176193765925137  0.6809509190739690
0.5285160768398904  0.3312771148247412  0.7502402235915763
0.5858189771101903  0.3461177116128481  0.1204993855315014
0.5549533189426973  0.3996373793735790  0.3438624943830575
0.4656082378235333  0.8514375364923671  0.5472713929940410
0.4578934872196873  0.8648201939163368  0.3461432150681591
0.4923007883258982  0.9344190469826640  0.2793790131505365
0.5352090487164611  0.9922187453001865  0.3997227900044129

```

|                    |                    |                    |
|--------------------|--------------------|--------------------|
| 0.5435781096669278 | 0.9785117558659630 | 0.5968377025684832 |
| 0.5100387327473455 | 0.9105699155747283 | 0.6682445300136731 |
| 0.4112884937209868 | 0.8093191848803888 | 0.2019258408786636 |
| 0.1710658223346302 | 0.6756012451782283 | 0.8749855394790401 |
| 0.1551436278907559 | 0.6531634186679083 | 0.6762841979244162 |
| 0.0799550674002457 | 0.6198218280863870 | 0.6084294994066519 |
| 0.0198872629029639 | 0.6088049728723210 | 0.7266575062383783 |
| 0.0369815636037342 | 0.6340642055512569 | 0.9202733632656971 |
| 0.1102928432513766 | 0.6666497453192355 | 0.9925085101428039 |
| 0.2131427057030007 | 0.6607032477309269 | 0.5347950115910917 |
| 0.3339831716404073 | 0.5573110155005465 | 0.2019019528822836 |
| 0.3516864346006124 | 0.5593886240979694 | 0.9988668348313957 |
| 0.3747667753050566 | 0.5143036321254073 | 0.9271003989833183 |
| 0.3793008492920386 | 0.4658604015830374 | 0.0462934709225829 |
| 0.3569690392369390 | 0.4613538064235427 | 0.2437189586864356 |
| 0.3348333936477828 | 0.5053879186305218 | 0.3195236301257816 |
| 0.3549562156859299 | 0.6123225174739259 | 0.8621812517389561 |
| 0.5439999227115828 | 0.7208200788883732 | 0.2624969959293817 |
| 0.5442104584348102 | 0.6993728816846165 | 0.9095074403386896 |
| 0.6164667675496225 | 0.7605311274295222 | 0.8217814059981557 |
| 0.7910598281469206 | 0.4833521244064713 | 0.5008568133879407 |
| 0.8077487850065128 | 0.4777974033791740 | 0.7009477634466836 |
| 0.8824367610334851 | 0.5201296563562599 | 0.7702679504356980 |
| 0.9412574709595279 | 0.5689303831233226 | 0.6521947371002915 |
| 0.9232483393456062 | 0.5759567495139264 | 0.4572889843327335 |
| 0.8505659672524674 | 0.5346501388701469 | 0.3836010437049883 |
| 0.7511249022442230 | 0.4276786791317405 | 0.8408954373267015 |
| 0.6228324763263696 | 0.2021518287903050 | 0.1698324426892336 |
| 0.5991957803737264 | 0.1857350555017263 | 0.3694817740796184 |
| 0.5713015523989038 | 0.1172033976566330 | 0.4395899867959488 |
| 0.5677359671226836 | 0.0643542693720969 | 0.3236411072816929 |
| 0.5941966156614389 | 0.0820998632338181 | 0.1293726752361329 |
| 0.6207089151369397 | 0.1486329619998628 | 0.0543499497284323 |
| 0.6006819765492302 | 0.2369335645363747 | 0.5085689713872806 |
| 0.4901812027532810 | 0.3589526863874481 | 0.8299132743096901 |
| 0.4985466944299441 | 0.3816423633629430 | 0.0284890429093672 |
| 0.4602555522088876 | 0.4147475903788237 | 0.0936465880732853 |
| 0.4124120318640052 | 0.4252149562003341 | 0.9734884448112675 |
| 0.4014940010044507 | 0.3992811270267489 | 0.7806512736137036 |
| 0.4389588886263365 | 0.3670629216759193 | 0.7109054486380512 |
| 0.5485880076662237 | 0.3757300182194927 | 0.1711393984871129 |
| 0.6707033990385626 | 0.8608380731680496 | 0.5787549283365462 |
| 0.6485741755885993 | 0.8922298491883112 | 0.4114290837940711 |
| 0.7238525461038635 | 0.9170326260072673 | 0.7233906782826752 |
| 0.4819499832916666 | 0.9419588232423651 | 0.1274018918946450 |
| 0.5779562185175663 | 0.0223999111821302 | 0.6948720582551490 |

|                    |                    |                    |
|--------------------|--------------------|--------------------|
| 0.5160433193859629 | 0.9008786056857140 | 0.8220864758041705 |
| 0.0696720083802750 | 0.6004810811410688 | 0.4585944214554062 |
| 0.9914502807697588 | 0.6282233716835707 | 0.0148145532839120 |
| 0.1229586381412654 | 0.6856454290531164 | 0.1427369713558017 |
| 0.3926814628937704 | 0.5209387571173738 | 0.7746247424735790 |
| 0.3574890462019338 | 0.4221213729273218 | 0.3388370666716509 |
| 0.3187283350510866 | 0.5022923325433106 | 0.4727627355671585 |
| 0.5574720154320200 | 0.6593413597473874 | 0.9536146578646850 |
| 0.6456573654027616 | 0.7400355473951284 | 0.7359866469820545 |
| 0.8934836646986418 | 0.5118507157213484 | 0.9209913438322920 |
| 0.9677375039733961 | 0.6152776927313627 | 0.3627286023560951 |
| 0.8374146701631039 | 0.5403668665577938 | 0.2325027125298433 |
| 0.5504408387120158 | 0.1061880703910480 | 0.5896691900647453 |
| 0.5943587077127985 | 0.0424455469087473 | 0.0364064994290743 |
| 0.6407614688008574 | 0.1616817883435314 | 0.9037899298059453 |
| 0.4716997715650144 | 0.4347103024960343 | 0.2428307691346093 |
| 0.3623898469244951 | 0.4045192510883792 | 0.6842427891214194 |
| 0.4305164398474732 | 0.3478379395727835 | 0.5609906054503416 |
| 0.5002342845477640 | 0.6760752752072886 | 0.7956837853021074 |
| 0.5610392872812582 | 0.7675175939871897 | 0.5708408906961708 |
| 0.5725061813891701 | 0.8240128536753969 | 0.7505185769319218 |
| 0.6541438586975620 | 0.7942914865653070 | 0.9383377844860407 |
| 0.4596150768552528 | 0.7054038053339436 | 0.0721817361789715 |
| 0.6969691881269138 | 0.8330322388465010 | 0.5165878119186764 |
| 0.6252132874252413 | 0.9234196948629491 | 0.4657237666685569 |
| 0.6070872865167692 | 0.8518487395877953 | 0.3128355881557575 |
| 0.6995953373653471 | 0.9271747100415464 | 0.3255676244456239 |
| 0.7730934563283086 | 0.9584932440864653 | 0.6440164010250201 |
| 0.7451411392230299 | 0.8967891874840587 | 0.8372246142410955 |
| 0.6954519576869903 | 0.9416189903981893 | 0.7941193846221984 |
| 0.5143285921240974 | 0.7176191908607209 | 0.0772266723390423 |
| 0.6007621691256244 | 0.8033137277932503 | 0.6810279473580230 |

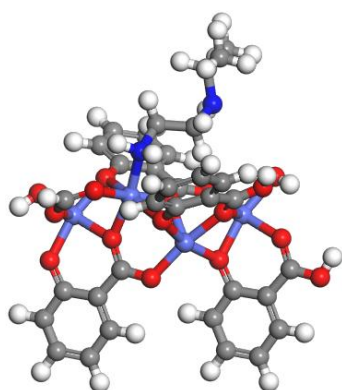

Co-(A) i-2-MOF

-1 1

|   |             |            |             |
|---|-------------|------------|-------------|
| H | -0.63453600 | 7.76993100 | -0.98222800 |
| H | 1.41330600  | 6.36800500 | -1.33197700 |

|    |             |             |             |
|----|-------------|-------------|-------------|
| Co | -2.45824000 | 1.25619100  | -1.46639900 |
| O  | -4.24033500 | 0.44468500  | -1.85478200 |
| O  | -0.88999700 | 2.49859200  | -1.06962500 |
| O  | -3.61072400 | 2.80910900  | -0.83034900 |
| O  | -4.40043200 | 4.88751400  | -0.67522900 |
| O  | -2.21011800 | 0.91102200  | 0.57169500  |
| O  | -4.25523600 | 0.70361300  | 1.42823500  |
| H  | -4.77097200 | 0.98845400  | -1.26350600 |
| C  | -0.87827200 | 3.84268200  | -1.07630100 |
| C  | -2.05280900 | 4.64144900  | -0.94359700 |
| C  | -1.93246000 | 6.04148500  | -0.90708800 |
| C  | -0.70392200 | 6.68892200  | -1.01989600 |
| C  | 0.44216600  | 5.88662400  | -1.19994000 |
| C  | 0.36114200  | 4.50470100  | -1.23114400 |
| C  | -3.41767300 | 4.07964300  | -0.80573600 |
| C  | -2.40826500 | 0.19487800  | 2.84331000  |
| C  | -3.30383700 | -0.11601800 | 3.87872400  |
| C  | -2.99605000 | 0.64309400  | 1.56090300  |
| H  | -3.59318300 | -0.88471200 | 5.87969100  |
| C  | -3.84375500 | -4.60758700 | -0.66578600 |
| C  | -4.74327100 | -4.74654200 | 0.55640100  |
| C  | -4.58954300 | -5.00110600 | -1.93424600 |
| H  | -2.84552600 | 6.61490200  | -0.74658400 |
| H  | -4.36640900 | 0.01545700  | 3.67173800  |
| H  | -2.90673500 | -3.13781400 | -1.70929000 |
| H  | -5.58886100 | -4.05404300 | 0.48289000  |
| H  | -5.13399600 | -5.76635200 | 0.62299800  |
| H  | -5.45761900 | -4.34961300 | -2.08116400 |
| H  | -4.93705200 | -6.03658200 | -1.87512000 |
| H  | -3.94479500 | -4.91375600 | -2.81592200 |
| N  | -3.39161500 | -3.22262200 | -0.81986300 |
| H  | 5.39515600  | 4.91759100  | 0.21532100  |
| H  | 7.44284800  | 3.51517800  | -0.13289200 |
| Co | 3.57129700  | -1.59666900 | -0.26735500 |
| Co | -0.21518600 | 1.33294600  | 0.44523800  |
| Co | 0.90894400  | -1.28165800 | 0.88561500  |
| O  | 1.81615200  | -2.38757600 | -0.66758800 |
| O  | -0.19670500 | -0.53786800 | -0.55801300 |
| O  | -1.38022800 | -0.15085600 | -2.40557100 |
| O  | 5.13952600  | -0.35421700 | 0.12941200  |
| O  | 2.42256100  | -0.06342100 | 0.36156300  |
| O  | 1.62910900  | 2.03468900  | 0.52386000  |
| O  | -0.08978200 | 0.18321500  | 2.06811400  |
| O  | 3.81939900  | -1.94179300 | 1.77076800  |
| O  | 1.78208300  | -2.04040000 | 2.66662300  |
| C  | 1.27997700  | -2.66979700 | -1.87028100 |



|   |             |             |             |
|---|-------------|-------------|-------------|
| C | 0.18988100  | -1.94522100 | -2.44887100 |
| C | -0.24293000 | -2.26039000 | -3.74725500 |
| C | 0.32380300  | -3.28585400 | -4.50044500 |
| C | 1.36837600  | -4.02256800 | -3.90378000 |
| C | 1.83428600  | -3.72427500 | -2.63398800 |
| C | -0.48349700 | -0.80967000 | -1.77835700 |
| C | 5.15125300  | 0.98985600  | 0.12287000  |
| C | 3.97673400  | 1.78861900  | 0.25548900  |
| C | 4.09708100  | 3.18865700  | 0.29199600  |
| C | 5.32561900  | 3.83609400  | 0.17918900  |
| C | 6.47170600  | 3.03379700  | -0.00085600 |
| C | 6.39068300  | 1.65187300  | -0.03206100 |
| C | 2.61186500  | 1.22682100  | 0.39334400  |
| C | -1.00968100 | -0.05298700 | 3.01619100  |
| H | 3.46102700  | -2.55984800 | 3.70713800  |
| C | -2.88305500 | -0.63818100 | 5.09927000  |
| C | -1.49490700 | -0.82085400 | 5.28248400  |
| C | -0.58513300 | -0.53388800 | 4.27923500  |
| C | 3.03344200  | -2.20969300 | 2.76002000  |
| C | -1.21920100 | -3.41795900 | 0.44096900  |
| C | -2.53843000 | -2.67911300 | 0.22192500  |
| H | -0.90555800 | -2.36412600 | 2.16644000  |
| H | -1.02832000 | -1.63480000 | -4.17187500 |
| H | 2.66266700  | -4.28691800 | -2.19947300 |
| H | 3.18401600  | 3.76207400  | 0.45249900  |
| H | 1.25160100  | 3.88995700  | -1.36951800 |
| H | -1.13089600 | -1.18968500 | 6.24388100  |
| H | 0.48613100  | -0.67920000 | 4.42768600  |
| H | -0.68776500 | -3.53512900 | -0.50626700 |
| H | -1.40964300 | -4.42173100 | 0.83634400  |
| H | -2.32100800 | -1.63840400 | -0.03433700 |
| H | -3.09757500 | -2.65585500 | 1.16639400  |
| H | 0.29800400  | -3.36363700 | 1.81308600  |
| H | -2.99759600 | -5.30809300 | -0.54505500 |
| H | -4.21137900 | -4.53891100 | 1.48995200  |
| N | -0.33940400 | -2.69531400 | 1.38345000  |
| H | -0.02452100 | -3.50801100 | -5.50293300 |
| H | 1.81555800  | -4.85243200 | -4.45466200 |
| O | 4.64934100  | -3.00367100 | -1.20645200 |
| H | 5.53294300  | -2.84866000 | -0.85192200 |
| H | 7.28105300  | 1.03717200  | -0.17045200 |
| H | -4.73917700 | 0.38273900  | 2.19783500  |
| H | -5.22288900 | 4.37445800  | -0.61294600 |

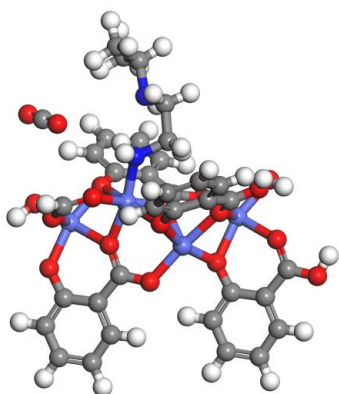

Co-(B) Complex

-1 1

|    |    |             |             |             |
|----|----|-------------|-------------|-------------|
| H  | 0  | -7.94175600 | 2.19207800  | -0.89266200 |
| Co | -1 | -2.52480200 | -1.85919200 | -1.59363900 |
| O  | -1 | -2.49152000 | -3.77212400 | -2.09026900 |
| O  | -1 | -3.13427300 | 0.01911000  | -1.05059300 |
| O  | -1 | -4.40025400 | -2.37932600 | -0.89206700 |
| O  | -1 | -6.62958800 | -2.38531900 | -0.75044200 |
| O  | -1 | -2.01243300 | -1.91580200 | 0.41358500  |
| O  | -1 | -2.67521000 | -3.89352500 | 1.21042800  |
| H  | 0  | -3.16416600 | -4.08561100 | -1.47702200 |
| C  | -1 | -4.37774100 | 0.52815700  | -1.03446300 |
| C  | -1 | -5.55244500 | -0.27470700 | -0.93679100 |
| C  | -1 | -6.81075100 | 0.34796200  | -0.88166600 |
| C  | -1 | -6.96165500 | 1.73192400  | -0.94250700 |
| C  | -1 | -5.79309900 | 2.50972500  | -1.08386300 |
| C  | -1 | -5.52285900 | -1.75357600 | -0.85303200 |
| C  | -1 | -1.58905500 | -3.40546700 | 3.70141100  |
| C  | -1 | -2.11567800 | -2.76842000 | 1.37754800  |
| H  | 0  | -1.02110400 | -4.01786700 | 5.69752200  |
| C  | 0  | 5.27585900  | -3.56254200 | -2.12728900 |
| H  | -1 | -7.68001000 | -0.29675500 | -0.74996200 |
| H  | -1 | -2.10819200 | -4.33373500 | 3.46040500  |
| H  | 0  | 2.90472500  | -3.13025200 | -1.43656700 |
| H  | 0  | 4.24916800  | -5.14867200 | -1.11564300 |
| H  | 0  | 4.58758500  | -3.50846400 | -2.97804700 |
| H  | 0  | 6.11895000  | -4.19624300 | -2.41683000 |
| H  | 0  | -3.04166800 | 6.68629000  | 0.48512000  |
| H  | -1 | -5.88353800 | 3.59440300  | -1.17363600 |
| Co | -1 | 2.37573000  | 2.63457800  | -0.21405000 |
| Co | -1 | -1.76408300 | 0.13985900  | 0.41318300  |
| Co | 0  | 1.08511300  | 0.24280500  | 0.82970300  |
| O  | 0  | 2.41350400  | 0.76255200  | -0.72428900 |
| O  | 0  | -0.04351200 | -0.38319400 | -0.67152400 |
| O  | -1 | -0.85837100 | -1.28084500 | -2.54121400 |
| O  | -1 | 1.76628000  | 4.51294800  | 0.32908300  |

|   |    |             |             |             |
|---|----|-------------|-------------|-------------|
| O | 0  | 0.51524700  | 2.11024400  | 0.46753500  |
| O | -1 | -1.72912500 | 2.10848800  | 0.62919500  |
| O | 0  | -0.63269400 | -0.26490200 | 2.00329100  |
| O | -1 | 2.88805900  | 2.57802500  | 1.79320800  |
| O | 0  | 2.10703400  | 0.66314500  | 2.62807100  |
| O | 0  | 5.24428400  | -0.39161400 | 1.38902800  |
| O | 0  | 6.54537400  | 0.47250900  | -0.34048400 |
| C | -1 | 2.47048700  | 0.21385500  | -1.95054100 |
| C | -1 | 1.39197500  | -0.49194100 | -2.56603200 |
| C | -1 | 1.54723900  | -1.00003500 | -3.86595800 |
| C | -1 | 2.73465600  | -0.86439900 | -4.58146400 |
| C | -1 | 3.79674000  | -0.17709300 | -3.95516800 |
| C | -1 | 3.67003900  | 0.35132500  | -2.68431100 |
| C | -1 | 0.09109400  | -0.71032800 | -1.90494000 |
| C | -1 | 0.52280100  | 5.02203500  | 0.34518100  |
| C | -1 | -0.65191100 | 4.21916300  | 0.44286700  |
| C | -1 | -1.91021300 | 4.84183000  | 0.49799400  |
| C | -1 | -2.06111700 | 6.22579200  | 0.43715500  |
| C | -1 | -0.89263100 | 7.00352800  | 0.29577700  |
| C | -1 | -4.53674100 | 1.92903800  | -1.13148300 |
| C | -1 | -0.62230900 | 2.74029100  | 0.52664400  |
| C | -1 | -0.76191400 | -1.23798200 | 2.91728100  |
| C | -1 | -1.51680100 | -2.43173100 | 2.69323100  |
| C | -1 | -0.96553800 | -3.24661900 | 4.93839100  |
| C | -1 | -0.27471400 | -2.03685900 | 5.16766900  |
| C | -1 | -0.17888000 | -1.05759000 | 4.19308700  |
| C | -1 | 2.78488900  | 1.72552000  | 2.75729000  |
| C | 0  | 5.89085300  | 0.04448600  | 0.52260300  |
| C | 0  | 1.43235900  | -2.75306300 | 0.69445100  |
| C | 0  | 2.52940000  | -3.77702600 | 0.43652800  |
| C | 0  | 4.58423000  | -4.11883500 | -0.89002000 |
| C | 0  | 5.55298700  | -4.18759100 | 0.28500500  |
| H | -1 | 0.68253300  | -1.48774100 | -4.31699600 |
| H | -1 | 4.50007700  | 0.87054400  | -2.20387200 |
| H | -1 | -2.77954200 | 4.19704700  | 0.62967900  |
| H | -1 | -3.63728300 | 2.53627300  | -1.24245400 |
| H | -1 | 0.19040400  | -1.86844300 | 6.14120400  |
| H | -1 | 0.36336400  | -0.12793600 | 4.37307600  |
| H | 0  | 0.78630500  | -3.08176000 | 1.51009300  |
| H | 0  | 2.06527600  | -4.74122200 | 0.16738400  |
| H | 0  | 0.80744500  | -2.63641100 | -0.19388900 |
| H | 0  | 2.85682200  | -1.35952500 | 0.45969700  |
| H | 0  | 3.09206200  | -3.94102400 | 1.36229100  |
| H | 0  | 2.34041600  | -1.45586900 | 1.99614500  |
| H | 0  | 5.65237600  | -2.55256500 | -1.93224100 |
| H | 0  | 6.44402500  | -4.75700700 | 0.00419500  |

|   |    |             |             |             |
|---|----|-------------|-------------|-------------|
| H | 0  | 5.11523000  | -4.67743600 | 1.15931500  |
| H | 0  | 5.86388700  | -3.17946500 | 0.57871000  |
| N | 0  | 2.00964800  | -1.43964800 | 1.03187500  |
| N | 0  | 3.43613200  | -3.26332600 | -0.57844700 |
| H | 0  | 2.83616600  | -1.26438200 | -5.58427700 |
| H | -1 | 4.74966600  | -0.08116000 | -4.47988000 |
| H | -1 | -0.98307000 | 8.08820700  | 0.20600400  |
| O | -1 | 4.04216100  | 3.21303500  | -1.16155500 |
| H | 0  | 4.21740300  | 4.06069700  | -0.73585700 |
| C | -1 | 0.36372400  | 6.42284000  | 0.24815700  |
| H | 0  | 3.27474300  | 1.93747000  | 3.71521300  |
| H | -1 | 1.26318300  | 7.03007500  | 0.13718700  |
| H | 0  | -2.61807300 | -4.46859600 | 1.98278200  |
| H | 0  | -6.44618200 | -3.33872200 | -0.72084700 |

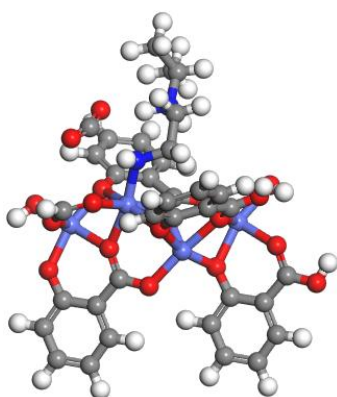

Co-(C) TS<sub>1</sub>

-1 1

|    |    |             |             |             |
|----|----|-------------|-------------|-------------|
| H  | 0  | -7.90847700 | 1.61721100  | -1.28092200 |
| Co | -1 | -2.18868700 | -2.05750600 | -1.45165200 |
| O  | -1 | -1.99709000 | -3.99668700 | -1.78320100 |
| O  | -1 | -2.95383400 | -0.19244700 | -1.09060000 |
| O  | -1 | -4.04828600 | -2.65852200 | -0.77288100 |
| O  | -1 | -6.27522900 | -2.82114400 | -0.70728500 |
| O  | -1 | -1.75474900 | -1.91076400 | 0.56944500  |
| O  | -1 | -2.30418700 | -3.86097600 | 1.50775000  |
| H  | 0  | -2.64541400 | -4.30885100 | -1.14397900 |
| C  | -1 | -4.23054200 | 0.22092600  | -1.15996200 |
| C  | -1 | -5.34703800 | -0.65761500 | -1.03477100 |
| C  | -1 | -6.64830400 | -0.12927800 | -1.07543400 |
| C  | -1 | -6.89640300 | 1.22970700  | -1.25827800 |
| C  | -1 | -5.78246300 | 2.07929700  | -1.42505700 |
| C  | -1 | -5.21389400 | -2.11819700 | -0.82520500 |
| C  | -1 | -1.35732700 | -3.09004300 | 3.98404700  |
| C  | -1 | -1.83473000 | -2.68695600 | 1.59802300  |
| H  | 0  | -0.82633000 | -3.49270600 | 6.04291800  |
| C  | 0  | 4.19674900  | -4.11694800 | -2.69296500 |
| H  | -1 | -7.47321800 | -0.82481200 | -0.91933300 |

|    |    |             |             |             |
|----|----|-------------|-------------|-------------|
| H  | -1 | -1.79779900 | -4.07145200 | 3.80491400  |
| H  | 0  | 2.27215400  | -3.15684300 | -1.28587000 |
| H  | 0  | 3.25373300  | -5.32846600 | -1.18539600 |
| H  | 0  | 3.28237800  | -3.96149200 | -3.27265800 |
| H  | 0  | 4.74237800  | -4.95079000 | -3.14048400 |
| H  | 0  | -3.40581200 | 6.56653400  | -0.12264000 |
| H  | -1 | -5.94748100 | 3.14305400  | -1.60932700 |
| Co | -1 | 2.31420100  | 2.89116900  | -0.29110800 |
| Co | -1 | -1.65605700 | 0.15084700  | 0.40356500  |
| Co | 0  | 1.20291000  | 0.44144300  | 0.90365300  |
| O  | 0  | 2.49655600  | 0.99141500  | -0.64405500 |
| O  | 0  | 0.15450300  | -0.35243400 | -0.56326200 |
| O  | -1 | -0.53170500 | -1.43455500 | -2.38744900 |
| O  | -1 | 1.54912200  | 4.75630100  | 0.06996000  |
| O  | 0  | 0.46753200  | 2.28251800  | 0.35883700  |
| O  | -1 | -1.77234000 | 2.12753100  | 0.45325900  |
| O  | 0  | -0.52759000 | -0.05190700 | 2.04536300  |
| O  | -1 | 2.74820700  | 3.03798300  | 1.73000700  |
| O  | 0  | 2.06073700  | 1.15237000  | 2.70201400  |
| O  | 0  | 4.65011500  | 0.13870500  | 1.80033400  |
| O  | 0  | 4.81741600  | -1.25413500 | -0.04564000 |
| C  | -1 | 2.65374200  | 0.35045200  | -1.81239300 |
| C  | -1 | 1.65482100  | -0.48275000 | -2.40225800 |
| C  | -1 | 1.89863400  | -1.08238800 | -3.64848200 |
| C  | -1 | 3.10094600  | -0.91654100 | -4.33203200 |
| C  | -1 | 4.08446100  | -0.10200300 | -3.73036600 |
| C  | -1 | 3.86868100  | 0.51759100  | -2.51358000 |
| C  | -1 | 0.34762800  | -0.74386300 | -1.76976500 |
| C  | -1 | 0.27241300  | 5.16967400  | 0.00059800  |
| C  | -1 | -0.84408400 | 4.29113300  | 0.12579100  |
| C  | -1 | -2.14535000 | 4.81946900  | 0.08512800  |
| C  | -1 | -2.39344900 | 6.17845300  | -0.09771700 |
| C  | -1 | -1.27957400 | 7.02797100  | -0.26451300 |
| C  | -1 | -4.48647900 | 1.59314800  | -1.38054000 |
| C  | -1 | -0.71093900 | 2.83055000  | 0.33535600  |
| C  | -1 | -0.65832700 | -0.93777600 | 3.04795000  |
| C  | -1 | -1.31521800 | -2.19944800 | 2.90012800  |
| C  | -1 | -0.79722400 | -2.78385400 | 5.22366800  |
| C  | -1 | -0.20555300 | -1.51070500 | 5.37314800  |
| C  | -1 | -0.14170100 | -0.61008500 | 4.32302600  |
| C  | -1 | 2.66822500  | 2.26179200  | 2.75858400  |
| C  | 0  | 4.53434100  | -0.58918200 | 0.89164200  |
| C  | 0  | 1.59457600  | -2.41450100 | 1.12092700  |
| C  | 0  | 2.55171300  | -3.53017400 | 0.72269500  |
| C  | 0  | 3.89554100  | -4.44334500 | -1.24062800 |
| C  | 0  | 5.15228600  | -4.66039000 | -0.41591300 |

|   |    |             |             |             |
|---|----|-------------|-------------|-------------|
| H | -1 | 1.09034100  | -1.66924100 | -4.08582900 |
| H | -1 | 4.63918900  | 1.13542000  | -2.05117900 |
| H | -1 | -2.97032900 | 4.12386200  | 0.24121100  |
| H | -1 | -3.62959200 | 2.25540900  | -1.51179300 |
| H | -1 | 0.20660300  | -1.22852900 | 6.34421700  |
| H | -1 | 0.32415500  | 0.36945500  | 4.44206500  |
| H | 0  | 1.11416500  | -2.76306500 | 2.04550400  |
| H | 0  | 2.05099800  | -4.50209500 | 0.74050300  |
| H | 0  | 0.79464000  | -2.36691900 | 0.37343500  |
| H | 0  | 3.61606600  | -2.44861500 | -0.65366800 |
| H | 0  | 3.41609700  | -3.56295900 | 1.38801500  |
| H | 0  | 2.45673100  | -1.00731100 | 2.25591500  |
| H | 0  | 4.81562500  | -3.21835600 | -2.77913000 |
| H | 0  | 5.74887200  | -5.44073500 | -0.89411000 |
| H | 0  | 4.93331100  | -4.99206600 | 0.60128600  |
| H | 0  | 5.75794000  | -3.75038100 | -0.36985100 |
| N | 0  | 2.22408600  | -1.10948600 | 1.26994700  |
| N | 0  | 3.06618000  | -3.32444300 | -0.66235700 |
| H | 0  | 3.27185500  | -1.38960700 | -5.29280800 |
| H | -1 | 5.04826400  | 0.02222500  | -4.22851000 |
| H | -1 | -1.44459200 | 8.09172900  | -0.44878300 |
| O | -1 | 3.97125000  | 3.51419300  | -1.22688900 |
| H | 0  | 4.07217000  | 4.40131000  | -0.86223000 |
| C | -1 | 0.01640900  | 6.54182200  | -0.21999700 |
| H | 0  | 3.10671500  | 2.58565300  | 3.71084600  |
| H | -1 | 0.87329600  | 7.20408300  | -0.35124900 |
| H | 0  | -2.22079500 | -4.36763400 | 2.32401000  |
| H | 0  | -6.02246300 | -3.75149300 | -0.58936400 |

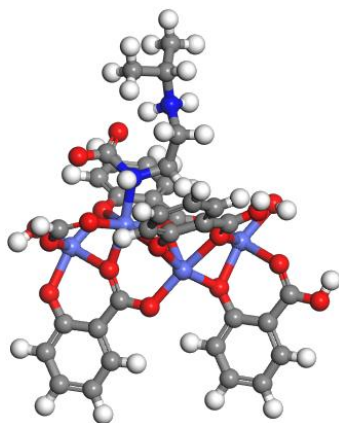

Co-(D) Intermediate from Gaussian

-1 1

|    |             |             |             |
|----|-------------|-------------|-------------|
| H  | -8.14101600 | -1.05859800 | -0.21097600 |
| Co | -1.64311100 | -2.45472600 | -1.65162300 |
| O  | -0.87953300 | -4.15725000 | -2.30386300 |
| O  | -2.90976400 | -1.02538500 | -0.91214400 |
| O  | -3.05667200 | -3.73745300 | -0.85380200 |

|    |             |             |             |
|----|-------------|-------------|-------------|
| O  | -5.05963400 | -4.67651600 | -0.54344000 |
| O  | -0.94830600 | -2.37861900 | 0.29930600  |
| O  | -0.65527500 | -4.48481300 | 0.98026400  |
| H  | -1.29305300 | -4.74759500 | -1.66560600 |
| C  | -4.24367400 | -1.08105900 | -0.75965000 |
| C  | -4.96866400 | -2.30326300 | -0.63849800 |
| C  | -6.35857600 | -2.26358200 | -0.43686300 |
| C  | -7.06932000 | -1.06668300 | -0.37281600 |
| C  | -6.34413100 | 0.13205800  | -0.53895400 |
| C  | -4.32655000 | -3.63782400 | -0.67826000 |
| C  | 0.38597700  | -3.69587800 | 3.41261000  |
| C  | -0.59254700 | -3.23717400 | 1.19549800  |
| H  | 1.35756600  | -4.10110900 | 5.30294700  |
| C  | 6.72070500  | -3.57625600 | -1.24057900 |
| H  | -6.86815500 | -3.21649600 | -0.29229000 |
| H  | 0.27147600  | -4.74476500 | 3.13694000  |
| H  | 4.26931400  | -3.15337700 | -1.34067500 |
| H  | 5.59381200  | -4.22850900 | 0.47173000  |
| H  | 6.22450100  | -4.26426600 | -1.93195700 |
| H  | 7.65619800  | -4.04069100 | -0.92060100 |
| H  | -5.40222000 | 5.00367100  | 1.15138300  |
| H  | -6.88030400 | 1.08350100  | -0.53270700 |
| Co | 1.09637200  | 3.60721500  | -0.28767700 |
| Co | -1.56662400 | -0.40805400 | 0.44781300  |
| Co | 1.06679000  | 0.88816000  | 0.65412400  |
| O  | 1.82421900  | 1.95879100  | -0.96491900 |
| O  | 0.10099600  | -0.11373400 | -0.80345800 |
| O  | -0.46823700 | -1.19559300 | -2.67320500 |
| O  | -0.17023900 | 5.03664600  | 0.45182100  |
| O  | -0.30298300 | 2.32893300  | 0.48991800  |
| O  | -2.32015000 | 1.38542600  | 0.82050600  |
| O  | -0.19703200 | -0.37976400 | 1.89943900  |
| O  | 1.79121900  | 3.68341100  | 1.66327200  |
| O  | 1.88500700  | 1.59513300  | 2.43308900  |
| O  | 4.33837800  | 1.25798600  | 0.98871100  |
| O  | 4.42552600  | -0.13236500 | -0.77417700 |
| C  | 1.99592900  | 1.52193100  | -2.21827900 |
| C  | 1.24467500  | 0.45836100  | -2.80517400 |
| C  | 1.45953000  | 0.11692400  | -4.15029200 |
| C  | 2.40592900  | 0.76472600  | -4.94084900 |
| C  | 3.15104100  | 1.80428500  | -4.34343500 |
| C  | 2.95065500  | 2.17721900  | -3.02745900 |
| C  | 0.22380500  | -0.30949900 | -2.06679800 |
| C  | -1.50415100 | 4.98097200  | 0.60431500  |
| C  | -2.22914100 | 3.75876800  | 0.72546900  |
| C  | -3.61905300 | 3.79844800  | 0.92710400  |

|   |             |             |             |
|---|-------------|-------------|-------------|
| C | -4.32979600 | 4.99534600  | 0.99114900  |
| C | -3.60464700 | 6.19399900  | 0.82499200  |
| C | -4.97243100 | 0.12937900  | -0.72955500 |
| C | -1.58702500 | 2.42420600  | 0.68570500  |
| C | 0.16534900  | -1.34944600 | 2.74724500  |
| C | -0.05211600 | -2.73831800 | 2.48472700  |
| C | 1.01355700  | -3.34495100 | 4.60723200  |
| C | 1.16694500  | -1.96844000 | 4.88112700  |
| C | 0.75141700  | -0.99748300 | 3.98528800  |
| C | 2.14697800  | 2.82485700  | 2.55946400  |
| C | 3.92350500  | 0.35143500  | 0.27820800  |
| C | 2.40453400  | -1.63763700 | 0.14810500  |
| C | 3.43554900  | -2.71041800 | 0.48373400  |
| C | 5.85896500  | -3.28758700 | -0.02259900 |
| C | 6.54441300  | -2.35257400 | 0.96036500  |
| H | 0.82947400  | -0.66660100 | -4.57234100 |
| H | 3.53959800  | 2.97368500  | -2.57139300 |
| H | -4.12867100 | 2.84544500  | 1.07165500  |
| H | -4.41797100 | 1.05992700  | -0.85888900 |
| H | 1.61986100  | -1.66348400 | 5.82682200  |
| H | 0.87998500  | 0.06488600  | 4.19867200  |
| H | 1.42670100  | -1.96284200 | 0.49090000  |
| H | 2.98371900  | -3.70345100 | 0.44526000  |
| H | 2.33112500  | -1.51448000 | -0.93393700 |
| H | 4.67276200  | -1.63278800 | -0.73006900 |
| H | 3.84141900  | -2.56808200 | 1.48785300  |
| H | 2.73254500  | -0.38375100 | 1.74845600  |
| H | 6.96631300  | -2.65434700 | -1.77733200 |
| H | 7.47888400  | -2.80999600 | 1.29334100  |
| H | 5.94023900  | -2.15926900 | 1.85058100  |
| H | 6.77998400  | -1.39583100 | 0.48428000  |
| N | 2.64751900  | -0.31096300 | 0.73320000  |
| N | 4.56790300  | -2.68075100 | -0.48642800 |
| H | 2.55858100  | 0.48641300  | -5.97784400 |
| H | 3.92097100  | 2.31022600  | -4.92971700 |
| H | -4.14082000 | 7.14544300  | 0.83123900  |
| O | 2.27128700  | 4.86643800  | -1.30924000 |
| H | 2.12367500  | 5.69311800  | -0.83458500 |
| C | -2.23294800 | 6.19132000  | 0.63439000  |
| H | 2.64000600  | 3.17912300  | 3.47264400  |
| H | -1.67848800 | 7.12186700  | 0.50505700  |
| H | -0.27783600 | -5.01458100 | 1.69262200  |
| H | -4.49925100 | -5.46760100 | -0.60467200 |



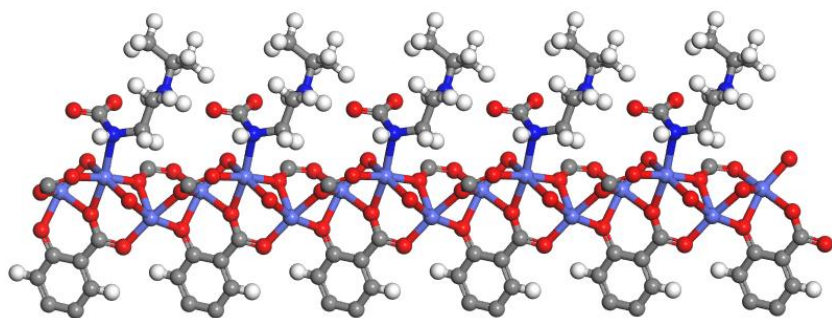

Co-(D) Intermediate from VASP

1.00000000000000

21.0330347578458365 0.0188169827592712 0.0121970733347169

-11.1657968838450525 19.0379629169887359 -0.0008465793614035

-0.0015120085625407 -0.0030330265258952 6.7906625854303941

Co O C H N

6 20 48 32 2

Direct

0.3318052508935264 0.7420314025123859 0.8430897959809383

0.2672229805833237 0.6463610321169772 0.1787671890577153

0.3765904158888604 0.6847410759604704 0.5021845453646356

0.6957305788554314 0.3572949952620194 0.2262166732191523

0.5939317253189096 0.2912204710518046 0.8929799385387569

0.6268745964562799 0.3879872580463057 0.5597258853276865

0.4117044396970062 0.7815785290841375 0.6453028084799617

0.3582296137034801 0.7373222624021123 0.2801076855794304

0.3797630461988904 0.8170105443150022 0.0482240605244361

0.2310045948142222 0.6886282841238127 0.9776774819735876

0.2754981338040198 0.6739677847069906 0.6140769924154840

0.1898838750966318 0.6211404701343078 0.3808570845551312

0.3189194492382399 0.6005808175777105 0.3097711718548480

0.3382099385476603 0.6575690066609033 0.9519952285388922

0.3843242817412129 0.6216776773479064 0.7125731462120330

0.5542943268464090 0.7650634039787826 0.7140333062462880

0.5698469951842799 0.8319072893317385 0.4431575745528274

0.7287730239690831 0.4351157662098037 0.4246865456956194

0.6863976415909615 0.3804872192538254 0.7885739745234204

0.7718668598315642 0.4078294547245435 0.0204569555149942

0.6427245185337311 0.2601195613892713 0.0909244941472240

0.6275888427458070 0.3002947312805057 0.4548289937554921

0.5697570704239940 0.2188092742738002 0.6865813800766496

0.5448644146611754 0.3415036153485899 0.7575435255388958

0.6021868185637788 0.3556762380490059 0.1221539147781601

0.5757376529854978 0.4115525478121538 0.3530735269607533

0.4433544348965164 0.8459000074994764 0.5652714445177793

0.4346535910160634 0.8584827057386852 0.3634807149138033

0.4703371730226598 0.9276005570941417 0.2916126355086577

0.5156322060832126 0.9851414950304120 0.4096187532651542

|                    |                    |                    |
|--------------------|--------------------|--------------------|
| 0.5243562381885564 | 0.9718546557541650 | 0.6081967170643593 |
| 0.4891738195250466 | 0.9045324306859404 | 0.6842019182836093 |
| 0.3886973588325999 | 0.8018412889243633 | 0.2237326021979633 |
| 0.1636814743026907 | 0.6580701767673688 | 0.8956655334380736 |
| 0.1496796370086709 | 0.6354995123179201 | 0.6954973372641189 |
| 0.0770527751940993 | 0.6018805673698157 | 0.6241518122824504 |
| 0.0176271298288874 | 0.5906356059831871 | 0.7412224152947060 |
| 0.0327044040267486 | 0.6153569539313783 | 0.9369800411868323 |
| 0.1035615697766076 | 0.6482456037147022 | 0.0124356607713909 |
| 0.2080287544620261 | 0.6438969404774979 | 0.5569765876854361 |
| 0.3401666715639903 | 0.5589100128189384 | 0.2257414271074176 |
| 0.3598773364741371 | 0.5634517424643163 | 0.0224592335416919 |
| 0.3875512050196305 | 0.5217337000893021 | 0.9499837862569992 |
| 0.3956210945667799 | 0.4745106121534380 | 0.0686852790851214 |
| 0.3728083474586018 | 0.4682684967408874 | 0.2668728060109467 |
| 0.3455613095049954 | 0.5088350245876152 | 0.3433937065006643 |
| 0.3603011957215337 | 0.6163464483573219 | 0.8867070510098677 |
| 0.5436014896941000 | 0.7748704257468467 | 0.5373331732269450 |
| 0.5044530327888159 | 0.7052072750594341 | 0.2182483609285036 |
| 0.5837993944151429 | 0.7472230316915631 | 0.1411072942964588 |
| 0.7958671807614665 | 0.4723942584002862 | 0.5077646556300793 |
| 0.8109493438380327 | 0.4648108072694727 | 0.7085706859826446 |
| 0.8833759044125675 | 0.5042327451991588 | 0.7802882746618107 |
| 0.9416354858040460 | 0.5521620987359187 | 0.6633813109849440 |
| 0.9254422084675801 | 0.5607002249902655 | 0.4671992494890663 |
| 0.8548379628645577 | 0.5221476842736098 | 0.3912432661023436 |
| 0.7539991957733767 | 0.4153804579029817 | 0.8462390662591629 |
| 0.6143474288438860 | 0.1962594876544107 | 0.1744173882299855 |
| 0.5905475845968954 | 0.1817477916740756 | 0.3747752185222103 |
| 0.5588747995992007 | 0.1127733913901142 | 0.4465644187460910 |
| 0.5512783435727407 | 0.0573593895767294 | 0.3307334172839553 |
| 0.5774937991053930 | 0.0730176957531694 | 0.1352794582697466 |
| 0.6079941779274961 | 0.1402323299288959 | 0.0589005967509185 |
| 0.5958754744294852 | 0.2358957746244491 | 0.5124454994012074 |
| 0.5081933686152759 | 0.3704489773092993 | 0.8397887618283215 |
| 0.5173152482070725 | 0.3933737185991021 | 0.0399165013794418 |
| 0.4791906644562271 | 0.4260769753745094 | 0.1098253265100068 |
| 0.4309106608046314 | 0.4359504739667405 | 0.9921513875466206 |
| 0.4201388663088386 | 0.4104829297118677 | 0.7971609341741901 |
| 0.4574715219194817 | 0.3786746011284151 | 0.7228769224618805 |
| 0.5674406468486460 | 0.3867517179808607 | 0.1788060345151806 |
| 0.6763963848554592 | 0.8714710030716554 | 0.0178820660727884 |
| 0.6737157374273677 | 0.9340309560990075 | 0.9312485649388386 |
| 0.7285400705417708 | 0.8912832152820988 | 0.1930530501468787 |
| 0.4599776939650138 | 0.9350480818452288 | 0.1387087060805954 |
| 0.5608353916678043 | 0.0157794772829607 | 0.7031060903538310 |

|                     |                    |                    |
|---------------------|--------------------|--------------------|
| 0.4967781241065239  | 0.8947401469208366 | 0.8373706914388624 |
| 0.0682201486916971  | 0.5827539440587767 | 0.4728700910748678 |
| 0.9875097192221268  | 0.6091221342669425 | 0.0304302211104662 |
| 0.1148479486280111  | 0.6673103795701157 | 0.1638832550286063 |
| 0.4059672540749597  | 0.5298447125458878 | 0.7971276203619688 |
| 0.3764863275890834  | 0.4302256590270152 | 0.3617926080991718 |
| 0.3284327947055803  | 0.5040896351734568 | 0.4970140625468430 |
| 0.4830121143347690  | 0.6495465832309414 | 0.1864838714057529 |
| 0.59073277444447817 | 0.7210468469589018 | 0.0126154848492177 |
| 0.8931072585809692  | 0.4946208821423925 | 0.9317478946909018 |
| 0.9696455366181876  | 0.5992052668087540 | 0.3735997792711597 |
| 0.8429849221671833  | 0.5291735465488964 | 0.2392744749596397 |
| 0.5383958556307609  | 0.1034640723985315 | 0.5975219644915887 |
| 0.5742479004391892  | 0.0311465046137805 | 0.0423407636333526 |
| 0.6280055347704968  | 0.1516437547417436 | 0.9074916578002873 |
| 0.4904373259193345  | 0.4456785342279127 | 0.2606679373692221 |
| 0.3808486521549981  | 0.4153716566182824 | 0.7031434720280577 |
| 0.4487515482181908  | 0.3592405910299078 | 0.5718264863319452 |
| 0.4699038943346139  | 0.7200791391734063 | 0.1326696439272948 |
| 0.5678372317995728  | 0.8079481270918812 | 0.9440944192206658 |
| 0.5812008519659263  | 0.8357863055249244 | 0.1967759206189424 |
| 0.6235605866179575  | 0.7539212373857535 | 0.2556436052464623 |
| 0.4904889732351477  | 0.6692731161193102 | 0.5074648404068097 |
| 0.6916709091005702  | 0.8465067018438782 | 0.9010043023234786 |
| 0.6551145178873451  | 0.9579627505504739 | 0.0426643932931280 |
| 0.6367069783459247  | 0.9180397164255191 | 0.8032223512186929 |
| 0.7289481557735242  | 0.9742356813203082 | 0.8824803425961766 |
| 0.7836301689794063  | 0.9331810443517441 | 0.1488568784811377 |
| 0.7338431128020908  | 0.8470249395456720 | 0.2458036215153360 |
| 0.7094142114762196  | 0.9102819844883895 | 0.3165111557340397 |
| 0.4928487240157828  | 0.7102165779908080 | 0.4309583287133911 |
| 0.5987121522086520  | 0.8177953363260122 | 0.0745810088378680 |

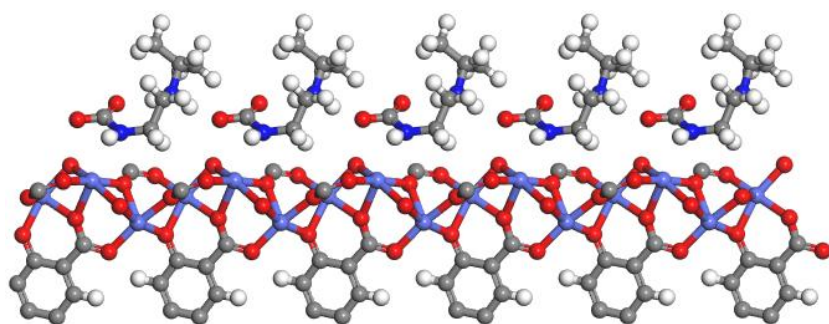

Co-(E) TS<sub>2</sub>

|                      |                     |                    |   |   |
|----------------------|---------------------|--------------------|---|---|
| 1.0000000000000000   |                     |                    |   |   |
| 20.8852976008490572  | 0.0000000000000000  | 0.0000000000000000 |   |   |
| -10.9420432698507568 | 19.0234478680574455 | 0.0000000000000000 |   |   |
| -0.0165701468162852  | 0.0185903576656078  | 6.7664745534520998 |   |   |
| Co                   | O                   | C                  | H | N |

## Direct

|                    |                    |                    |
|--------------------|--------------------|--------------------|
| 0.3319024854497307 | 0.7456536581792309 | 0.8388946573374702 |
| 0.2671684362246370 | 0.6499304862568465 | 0.1737577669033223 |
| 0.3782659774588741 | 0.6873998606961549 | 0.4996785963488913 |
| 0.6957979731211867 | 0.3596013124820105 | 0.2213436864741187 |
| 0.5939578366112017 | 0.2921313096574175 | 0.8873127377200826 |
| 0.6247901903577675 | 0.3890153415270194 | 0.5532187281483122 |
| 0.4119265225976465 | 0.7823237071725568 | 0.6403994283481019 |
| 0.3647109364990127 | 0.7392692525687888 | 0.2695497362037608 |
| 0.3818038810632869 | 0.8201677164294443 | 0.0440271703226642 |
| 0.2309883487851780 | 0.6942549995737006 | 0.9744347790679447 |
| 0.2759342979021672 | 0.6791440463934474 | 0.6087314103563395 |
| 0.1900431707836465 | 0.6262142673780471 | 0.3753714806089548 |
| 0.3157314052288986 | 0.6010297805272631 | 0.3068118647249368 |
| 0.3350730770519086 | 0.6583508097215539 | 0.9439752803054173 |
| 0.3819158225807159 | 0.6224263716668185 | 0.7042754239550320 |
| 0.5386133179630209 | 0.7569814773060940 | 0.5999538116118028 |
| 0.5769931762011018 | 0.8251656052150459 | 0.3215529817291184 |
| 0.7271440861552038 | 0.4379769191911450 | 0.4182198880990242 |
| 0.6854185338632736 | 0.3832051585967833 | 0.7840744695962941 |
| 0.7717441657353057 | 0.4106772941125905 | 0.0157334028048383 |
| 0.6451789815088826 | 0.2623651629841209 | 0.0853820058668064 |
| 0.6287706609616616 | 0.3020541759497357 | 0.4505234793869659 |
| 0.5713432753579185 | 0.2198659467529554 | 0.6819797139921626 |
| 0.5420102239287056 | 0.3403670372547227 | 0.7488707972693033 |
| 0.6000596965569637 | 0.3555356442342008 | 0.1161018091313866 |
| 0.5719306307917948 | 0.4111825913369476 | 0.3452234120731140 |
| 0.4466468593759764 | 0.8470916861059054 | 0.5607426208449896 |
| 0.4395691459632476 | 0.8604438433893872 | 0.3576151683944593 |
| 0.4757975216443615 | 0.9297137019078286 | 0.2862349181718636 |
| 0.5207319202701410 | 0.9869005633564508 | 0.4059363100410532 |
| 0.5283999200800692 | 0.9728692627562407 | 0.6055390152938059 |
| 0.4923494005668648 | 0.9052068345511992 | 0.6814079744594764 |
| 0.3932947481888630 | 0.8042298620350440 | 0.2170798866258181 |
| 0.1634481069213957 | 0.6630599309511687 | 0.8916227751971862 |
| 0.1495629222960598 | 0.6402098567310739 | 0.6910531429848389 |
| 0.0767119623944105 | 0.6061684389474024 | 0.6191287174686596 |
| 0.0168281847127496 | 0.5947161734252715 | 0.7358711082446929 |
| 0.0317394131018442 | 0.6196378897591519 | 0.9320175505316234 |
| 0.1027895955508348 | 0.6529216217635877 | 0.0080514446181513 |
| 0.2082319953745981 | 0.6488799633016048 | 0.5521049679128635 |
| 0.3368284171043677 | 0.5593438739583765 | 0.2201354940625715 |
| 0.3546454101329891 | 0.5625001557837228 | 0.0146136297332598 |
| 0.3803383909241274 | 0.5188827000808356 | 0.9405226056065057 |
| 0.3886013887522092 | 0.4713289449493430 | 0.0593427936463189 |

|                     |                    |                    |
|---------------------|--------------------|--------------------|
| 0.3678574841904170  | 0.4665331533071795 | 0.2599179118998193 |
| 0.3425198396876299  | 0.5087595165694456 | 0.3379241456056181 |
| 0.3564507274193378  | 0.6163671800609652 | 0.8785997646746578 |
| 0.54447419333639277 | 0.7670784986451514 | 0.4136163127271087 |
| 0.5166868880866269  | 0.6993772429802559 | 0.0905041955074809 |
| 0.5941826864944937  | 0.7443891402527770 | 1.0021906295942953 |
| 0.7943692613636271  | 0.4756520762516431 | 0.5015605652418101 |
| 0.8099446449873904  | 0.4679762624768967 | 0.7029124532223388 |
| 0.8825563492316834  | 0.5076119913094718 | 0.7748114571507093 |
| 0.9406066872847038  | 0.5559601616197551 | 0.6575544210810407 |
| 0.9238793000316537  | 0.5646998848687708 | 0.4608838482630142 |
| 0.8530746755809997  | 0.5259393992534620 | 0.3848213529900603 |
| 0.7532878426459119  | 0.4182542476211444 | 0.8410996911270860 |
| 0.6179488371729669  | 0.1984965991732069 | 0.1695085987649541 |
| 0.5938614828016648  | 0.1836722607382473 | 0.3702561229032187 |
| 0.5630149059207106  | 0.1146367184931741 | 0.4427875176460260 |
| 0.5565087904643589  | 0.0594019601365003 | 0.3272560912690901 |
| 0.5833332567751015  | 0.0754253848609848 | 0.1316787237040854 |
| 0.6130436437989998  | 0.1427135590970716 | 0.0545672455127481 |
| 0.5978513056951722  | 0.2374731818438918 | 0.5077244275202176 |
| 0.5036133184813990  | 0.3681002653103102 | 0.8308453612196401 |
| 0.5124922137240387  | 0.3911322636819591 | 0.0313445088174806 |
| 0.4730043905906082  | 0.4230204281291285 | 0.1008147669460502 |
| 0.4236557829834890  | 0.4320882468521703 | 0.9826203096801467 |
| 0.4127792996056366  | 0.4061343720760360 | 0.7876516913164572 |
| 0.4514137311277254  | 0.3750065183191660 | 0.7136855094860095 |
| 0.5638941382944214  | 0.3858822031632520 | 0.1711834197823340 |
| 0.6801585421501326  | 0.8692129074281481 | 0.8774358844541597 |
| 0.6735630700557341  | 0.9270680442566357 | 0.7694786081682975 |
| 0.7317317122586633  | 0.8963889069537281 | 0.0555326323534050 |
| 0.4661367417628438  | 0.9376821508448574 | 0.1323330679493918 |
| 0.5644478699008298  | 0.0165108626267558 | 0.7019436253233877 |
| 0.4985131442658601  | 0.8952248363280270 | 0.8364045871592592 |
| 0.0681570227822473  | 0.5869626209157586 | 0.4675339905899223 |
| 0.9861950958612004  | 0.6132596596839300 | 0.0253018852666733 |
| 0.1138659909324585  | 0.6721236963554266 | 0.1597934901079852 |
| 0.3975887691806105  | 0.5262471211272405 | 0.7861572367853557 |
| 0.3716945369207349  | 0.4281928254933856 | 0.3551034686543993 |
| 0.3267197399188073  | 0.5048464501830962 | 0.4930346482738452 |
| 0.4984800675068485  | 0.6441410408657936 | 0.0595487963774842 |
| 0.5993557993540131  | 0.7190257047606683 | 0.8686830717189239 |
| 0.8926459249801789  | 0.4978611560506189 | 0.9267283735426817 |
| 0.9678182880537987  | 0.6035382770279980 | 0.3668986018570724 |
| 0.8408242198539825  | 0.5331667434386851 | 0.2325274113569736 |
| 0.5421724279939210  | 0.1051667492356574 | 0.5939175274857220 |
| 0.5811457945422968  | 0.0337306696530395 | 0.0392718002270047 |

|                    |                    |                    |
|--------------------|--------------------|--------------------|
| 0.6334235578743281 | 0.1543557265479338 | 0.9029700807030256 |
| 0.4842340502885417 | 0.4429298257895478 | 0.2517229437027298 |
| 0.3725853903861572 | 0.4102676458890570 | 0.6933321814283598 |
| 0.4427178586381592 | 0.3553194300275289 | 0.5624832744983613 |
| 0.4790531227813707 | 0.7117147859614285 | 0.0074352061708061 |
| 0.5699068173499624 | 0.8025773202275134 | 0.8118134567639819 |
| 0.5866798274962136 | 0.8303594178617280 | 0.0656779861155863 |
| 0.6376234624688051 | 0.7526419927837243 | 0.1077354729820410 |
| 0.4974889783044470 | 0.6610357064817384 | 0.3824513863600325 |
| 0.6988241470296597 | 0.8431144181505831 | 0.7719672102131756 |
| 0.6534547805425027 | 0.9531226619411981 | 0.8702362693232354 |
| 0.6359183788899089 | 0.9059406161514741 | 0.6424043130982457 |
| 0.7280539636926723 | 0.9670744053215863 | 0.7148900914220259 |
| 0.7869530112383161 | 0.9368662211915142 | 1.0071387174000783 |
| 0.7372305212761874 | 0.8547606346787661 | 0.1303075036585290 |
| 0.7111950473217620 | 0.9196363114329235 | 0.1644785962965877 |
| 0.5072652704442130 | 0.7040830557962451 | 0.3026568219191748 |
| 0.6038403076462580 | 0.8138669454736933 | 0.9393232015430082 |

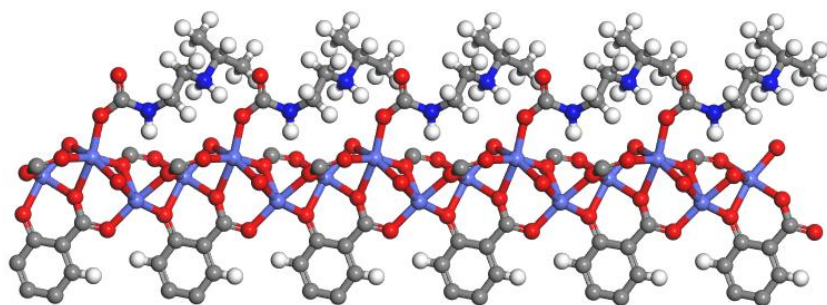

Co-(F) Product

|                      |                     |                    |    |   |
|----------------------|---------------------|--------------------|----|---|
| 1.0000000000000000   |                     |                    |    |   |
| 20.4153876434187005  | -0.1248403559461782 | 0.0956485489989049 |    |   |
| -11.1066950857792737 | 19.0573501749672687 | 0.0332754310560381 |    |   |
| -0.0548991221568655  | -0.0024883582378659 | 6.7953264322829954 |    |   |
| Co                   | O                   | C                  | H  | N |
| 6                    | 20                  | 48                 | 32 | 2 |

Direct

|                    |                    |                    |
|--------------------|--------------------|--------------------|
| 0.3448903838471864 | 0.7519571173260999 | 0.8205784147424495 |
| 0.2719972199196974 | 0.6581155589653847 | 0.1586581893326766 |
| 0.3875276132220975 | 0.6881885814157584 | 0.4730521944253212 |
| 0.6948554023858264 | 0.3639365438476858 | 0.2192040245908728 |
| 0.5914963771066866 | 0.2914065965127790 | 0.8852848188499394 |
| 0.6173166780777350 | 0.3862029333735251 | 0.5515071085584040 |
| 0.4301888828902705 | 0.7865263738375674 | 0.6294859845569576 |
| 0.3725506748989744 | 0.7448666539761106 | 0.2567773637980224 |
| 0.4007541418550034 | 0.8269704806182503 | 0.0273282683937524 |
| 0.2413905922159714 | 0.7062307426306518 | 0.9565724921622376 |
| 0.2844699752674842 | 0.6882219163312797 | 0.5901881571036753 |
| 0.1942572948172767 | 0.6395752747012367 | 0.3597490249278934 |

|                    |                    |                    |
|--------------------|--------------------|--------------------|
| 0.3136797364680888 | 0.6029049483913340 | 0.2871782794798321 |
| 0.3432353455615100 | 0.6641302444811572 | 0.9333100835269761 |
| 0.3755140208713996 | 0.6180412525718353 | 0.6863705173500136 |
| 0.4983201513958946 | 0.7187663359249115 | 0.4121634783136798 |
| 0.6037062663589765 | 0.7247635862404778 | 0.2867893922427598 |
| 0.7224367993396683 | 0.4406606893915566 | 0.4165839794652939 |
| 0.6820738857432289 | 0.3852082004187380 | 0.7816120509842932 |
| 0.7715853493095750 | 0.4188246522432451 | 0.0131391130825449 |
| 0.6479883966029050 | 0.2666040598575350 | 0.0847739876365239 |
| 0.6279471058856956 | 0.3031118649153939 | 0.4487805085595014 |
| 0.5738076645126640 | 0.2200935933286416 | 0.6806253892106966 |
| 0.5331132544447073 | 0.3340356917215743 | 0.7480847459123865 |
| 0.5933550926777258 | 0.3519163722380725 | 0.1146998532970116 |
| 0.5609222890336554 | 0.4041644527937649 | 0.3428291182630403 |
| 0.4632103123909417 | 0.8511256554042390 | 0.5489321692888964 |
| 0.4560159987499404 | 0.8650681933652393 | 0.3463647793607834 |
| 0.4919125301451288 | 0.9349836684976864 | 0.2789721100460767 |
| 0.5358777920029212 | 0.9925701037415422 | 0.4002954501367952 |
| 0.5438844619864653 | 0.9782638111067286 | 0.5985409680781970 |
| 0.5089125667638115 | 0.9099237916155261 | 0.6704554945612671 |
| 0.4077634298905508 | 0.8097219439623444 | 0.2023741578265188 |
| 0.1715706227795835 | 0.6768382875816030 | 0.8758458180854305 |
| 0.1558890229740797 | 0.6540276010700410 | 0.6765615308302984 |
| 0.0805045272384888 | 0.6205473381825115 | 0.6079070290274444 |
| 0.0199475094925035 | 0.6094820378709969 | 0.7269636133031128 |
| 0.0368064302031854 | 0.6351192986225840 | 0.9213114388263151 |
| 0.1104642727845331 | 0.6681614736967560 | 0.9939251067232959 |
| 0.2147023832330675 | 0.6610361743895794 | 0.5359698924751015 |
| 0.3306067462739506 | 0.5580395601533183 | 0.2024609790483609 |
| 0.3497781287668218 | 0.5609839664825458 | 0.9989480693212442 |
| 0.3732729070877667 | 0.5154895536492319 | 0.9266054227722336 |
| 0.3775715946311351 | 0.4661999623984201 | 0.0463019339063209 |
| 0.3540072321355439 | 0.4609270351143735 | 0.2440139025058414 |
| 0.3307085330020243 | 0.5049547983663771 | 0.3199300453846803 |
| 0.3549935374721471 | 0.6158840118800555 | 0.8632275278846109 |
| 0.5402119626433759 | 0.7190192464465923 | 0.2636140549764008 |
| 0.5415849693516037 | 0.6966302892202094 | 0.9100584971257177 |
| 0.6148558217608198 | 0.7564053909384114 | 0.8221855300459637 |
| 0.7911485589112814 | 0.4819504608553231 | 0.4992970817055777 |
| 0.8081576783735187 | 0.4760759673178754 | 0.7002184858992280 |
| 0.8826775772750679 | 0.5192063703700214 | 0.7708038990051165 |
| 0.9410690306539777 | 0.5689669749074255 | 0.6523149909181782 |
| 0.9226480261082628 | 0.5761974967227133 | 0.4565651080195323 |
| 0.8499595186181850 | 0.5341991749432538 | 0.3819430208299011 |
| 0.7515723005915760 | 0.4243404498674153 | 0.8387060681626082 |
| 0.6241781576944518 | 0.2034788596291293 | 0.1687350799938088 |

|                    |                    |                    |
|--------------------|--------------------|--------------------|
| 0.5999818423355450 | 0.1871657234667410 | 0.3690728624745176 |
| 0.5723803875441362 | 0.1184678980063438 | 0.4403919610630638 |
| 0.5693441575033091 | 0.0652195006684337 | 0.3241324216183941 |
| 0.5965673783368146 | 0.0829266321372586 | 0.1293733906402608 |
| 0.6231456283314358 | 0.1498341789871347 | 0.0534827160003601 |
| 0.6002658716581095 | 0.2390037149642055 | 0.5066545183952869 |
| 0.4935401859529023 | 0.3614697337681250 | 0.8283835758670861 |
| 0.5019796252803843 | 0.3845509414775066 | 0.0276620449194169 |
| 0.4618074100679337 | 0.4166267555104568 | 0.0940905027658587 |
| 0.4122912531155905 | 0.4259582659170817 | 0.9734881775465567 |
| 0.4015986327640277 | 0.3997920618807953 | 0.7798429172105728 |
| 0.4407325348958508 | 0.3682864701321478 | 0.7092415948645439 |
| 0.5543914136213957 | 0.3800875535128299 | 0.1687876181834440 |
| 0.6709761042185391 | 0.8571868344917490 | 0.5779175341081384 |
| 0.6495729481414756 | 0.8910978744390263 | 0.4129825961142686 |
| 0.7265851808518917 | 0.9118953859305705 | 0.7229914324242586 |
| 0.4817381395680016 | 0.9431285376856025 | 0.1261581392044775 |
| 0.5789372864152398 | 0.0219730897433905 | 0.6971457404014316 |
| 0.5144258190357149 | 0.8997423834081530 | 0.8253518403113560 |
| 0.0703235213858733 | 0.6008490860308484 | 0.4574868148172513 |
| 0.9908135071531419 | 0.6291793598965114 | 0.0162119625893808 |
| 0.1230445614339573 | 0.6875384129678039 | 0.1446914716061585 |
| 0.3921667529572730 | 0.5226502530712835 | 0.7738710832609854 |
| 0.3544884630373346 | 0.4211131865305546 | 0.3392517134846074 |
| 0.3133718763244175 | 0.5011732263338686 | 0.4733251361724200 |
| 0.5535608029001011 | 0.6553719497758337 | 0.9569979559685819 |
| 0.6426524800204660 | 0.7342945988053842 | 0.7340984188337885 |
| 0.8941729842328101 | 0.5107244521278176 | 0.9221588869746924 |
| 0.9668059704758889 | 0.6161802644265819 | 0.3620218529688373 |
| 0.8363848359593149 | 0.5400966675987959 | 0.2302178292834753 |
| 0.5509134198252781 | 0.1074571853929882 | 0.5909137804101903 |
| 0.5971895230646709 | 0.0429420222438139 | 0.0365768042055095 |
| 0.6438575235181716 | 0.1629358624018238 | 0.9025243415492810 |
| 0.4731587323833182 | 0.4369769270088142 | 0.2438476294297942 |
| 0.3613889200038116 | 0.4043282714540553 | 0.6833986203570959 |
| 0.4323944286900527 | 0.3487247502032318 | 0.5587623062784388 |
| 0.4978297959823905 | 0.6741235881216170 | 0.7945914333258983 |
| 0.5592860597472580 | 0.7664859042062488 | 0.5737892421998083 |
| 0.5740354662982341 | 0.8239831880291106 | 0.7551092100637646 |
| 0.6534429594421454 | 0.7892794263570906 | 0.9392586505228309 |
| 0.4574567771878932 | 0.7066182255682563 | 0.0679560730703912 |
| 0.6949206062936994 | 0.8272052811653268 | 0.5120812074618755 |
| 0.6278825094980718 | 0.9238924297713567 | 0.4709534273619056 |
| 0.6067500459982043 | 0.8518007122557876 | 0.3138663318627195 |
| 0.7007515523639327 | 0.9251296386672152 | 0.3257189795583599 |
| 0.7762774212841848 | 0.9523518177061163 | 0.6420984634198277 |



|                    |                    |                    |
|--------------------|--------------------|--------------------|
| 0.7472337794881199 | 0.8894905705272294 | 0.8345835176825602 |
| 0.7003765285490360 | 0.9384955480970518 | 0.7979586677255099 |
| 0.5118094457240119 | 0.7167624976850107 | 0.0763007153393218 |
| 0.6003623174420767 | 0.8012673560203893 | 0.6826600772597970 |

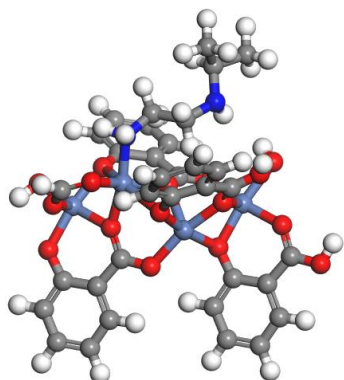

Ni-(A) i-2-MOF

-1 1

|    |    |             |             |             |
|----|----|-------------|-------------|-------------|
| H  | 0  | -1.21628900 | 7.67156700  | -0.45523900 |
| Ni | -1 | -2.48088900 | 1.17842100  | -1.48741100 |
| H  | 0  | -5.52489200 | 3.90040300  | -0.59158300 |
| O  | -1 | -4.14311800 | 0.12591300  | -1.98446400 |
| O  | -1 | -1.01271700 | 2.41994700  | -1.03075300 |
| O  | -1 | -3.78924600 | 2.51475900  | -0.93985700 |
| O  | -1 | -4.74660300 | 4.48013700  | -0.54362900 |
| O  | -1 | -2.29699100 | 0.74198600  | 0.50975400  |
| O  | -1 | -4.32055200 | 0.19627800  | 1.26349200  |
| H  | 0  | -3.79693800 | -0.50817400 | -2.62470900 |
| C  | -1 | -1.13024700 | 3.75607000  | -0.90755200 |
| C  | -1 | -2.37109600 | 4.44799400  | -0.74562700 |
| C  | -1 | -2.36700100 | 5.84368200  | -0.57550900 |
| C  | -1 | -1.19481800 | 6.59644900  | -0.58988900 |
| C  | -1 | 0.01690300  | 5.90721400  | -0.80072000 |
| C  | -1 | 0.05142600  | 4.53186300  | -0.95676900 |
| C  | -1 | -3.69729300 | 3.78244800  | -0.73239400 |
| C  | -1 | -2.47703800 | -0.20922500 | 2.70661600  |
| C  | -1 | -3.37185800 | -0.66303200 | 3.69097900  |
| C  | -1 | -3.07146200 | 0.27629400  | 1.44080700  |
| H  | 0  | -3.64683000 | -1.56260400 | 5.63875500  |
| C  | 0  | -3.72397100 | -4.34732900 | -0.66855200 |
| C  | 0  | -4.11063400 | -5.19017100 | 0.54123200  |
| C  | 0  | -4.88579600 | -4.23600000 | -1.64700300 |
| H  | -1 | -3.33028800 | 6.32419400  | -0.40088100 |
| H  | -1 | -4.43569800 | -0.60873100 | 3.45807800  |
| H  | 0  | -3.25250600 | -2.39973400 | -1.06808300 |
| H  | 0  | -4.93406500 | -4.71395900 | 1.08454500  |
| H  | 0  | -3.27526200 | -5.32107100 | 1.23637900  |
| H  | 0  | -4.43330500 | -6.18608700 | 0.22314300  |

|    |    |             |             |             |
|----|----|-------------|-------------|-------------|
| H  | 0  | -5.74513100 | -3.75895300 | -1.16356500 |
| H  | 0  | -5.19108100 | -5.22434400 | -2.00269100 |
| H  | 0  | -4.61082000 | -3.63516100 | -2.52121200 |
| N  | 0  | -3.34754200 | -2.99819400 | -0.25291100 |
| H  | 0  | 4.92323400  | 5.24867900  | 0.73790100  |
| H  | -1 | 0.94797300  | 6.47473700  | -0.86135400 |
| Ni | -1 | 3.65833600  | -1.24442500 | -0.29659500 |
| Ni | -1 | -0.37965600 | 1.21073400  | 0.48210000  |
| Ni | 0  | 1.11860200  | -1.42187200 | 0.82399000  |
| O  | 0  | 2.06129300  | -2.19921000 | -0.86123100 |
| O  | 0  | -0.17319600 | -0.60667900 | -0.63579500 |
| O  | -1 | -1.29560400 | -0.07775000 | -2.49072000 |
| O  | -1 | 5.12672400  | -0.00287100 | 0.15967800  |
| O  | 0  | 2.36884300  | 0.06844800  | 0.35438200  |
| O  | -1 | 1.39273700  | 2.05707400  | 0.64690000  |
| O  | 0  | -0.17587800 | 0.12287200  | 2.04645700  |
| O  | -1 | 3.84221300  | -1.68085900 | 1.70031900  |
| O  | 0  | 1.80657100  | -2.00520800 | 2.59331400  |
| C  | -1 | 1.54609900  | -2.43418900 | -2.05216600 |
| C  | -1 | 0.42848700  | -1.72842000 | -2.61205700 |
| C  | -1 | 0.06590200  | -1.95348100 | -3.95236100 |
| C  | -1 | 0.72609000  | -2.86625100 | -4.77083300 |
| C  | -1 | 1.80416600  | -3.57514500 | -4.20299600 |
| C  | -1 | 2.20137900  | -3.36515000 | -2.89445300 |
| C  | -1 | -0.37428000 | -0.71273600 | -1.88598000 |
| C  | -1 | 5.00896500  | 1.33304700  | 0.28296700  |
| C  | -1 | 3.76813800  | 2.02497700  | 0.44485700  |
| C  | -1 | 3.77223200  | 3.42066600  | 0.61497300  |
| C  | -1 | 4.94450800  | 4.17339500  | 0.60062300  |
| C  | -1 | 6.15622900  | 3.48416100  | 0.38979100  |
| C  | -1 | 6.19066000  | 2.10884500  | 0.23372300  |
| C  | -1 | 2.44190400  | 1.35931000  | 0.45810900  |
| C  | -1 | -1.06781200 | -0.34749600 | 2.90931900  |
| H  | 0  | 3.49663200  | -2.65487100 | 3.50806700  |
| C  | -1 | -2.94048800 | -1.21825400 | 4.89274100  |
| C  | -1 | -1.54693900 | -1.29546700 | 5.10766400  |
| C  | -1 | -0.63886900 | -0.87235600 | 4.15351500  |
| C  | -1 | 3.06770200  | -2.14699900 | 2.63118600  |
| C  | 0  | -0.89060400 | -3.52602700 | 0.12339400  |
| C  | 0  | -2.17820700 | -2.85566200 | 0.58982300  |
| H  | 0  | -0.01591700 | -3.23488800 | 1.96098500  |
| H  | -1 | -0.75173300 | -1.35096900 | -4.34915100 |
| H  | -1 | 3.04850500  | -3.91167900 | -2.47643300 |
| H  | -1 | 2.80894600  | 3.90117600  | 0.78961400  |
| H  | -1 | 0.99287900  | 4.00724600  | -1.12208900 |
| H  | -1 | -1.17926900 | -1.68950300 | 6.05729800  |

|   |    |             |             |             |
|---|----|-------------|-------------|-------------|
| H | -1 | 0.43601600  | -0.93470400 | 4.32761100  |
| H | 0  | -0.66207100 | -3.25115300 | -0.90768600 |
| H | 0  | -0.96871500 | -4.61808200 | 0.16874500  |
| H | 0  | -1.96077200 | -1.78969600 | 0.66422800  |
| H | 0  | -2.41033700 | -3.20554800 | 1.60548200  |
| H | 0  | 1.01668600  | -3.73492100 | 0.81993600  |
| H | 0  | -2.89696200 | -4.86437800 | -1.19008300 |
| N | 0  | 0.23583400  | -3.10030200 | 0.98130100  |
| H | 0  | 0.42689700  | -3.02101000 | -5.80172500 |
| H | -1 | 2.32715500  | -4.31949400 | -4.80609300 |
| H | -1 | 7.08720700  | 4.05171900  | 0.32913700  |
| O | -1 | 4.84347000  | -2.50096100 | -1.30019700 |
| H | 0  | 5.69702000  | -2.29884200 | -0.89849100 |
| H | -1 | 7.13220500  | 1.58419300  | 0.06842100  |
| H | -1 | -4.79735300 | -0.16508000 | 2.03968900  |

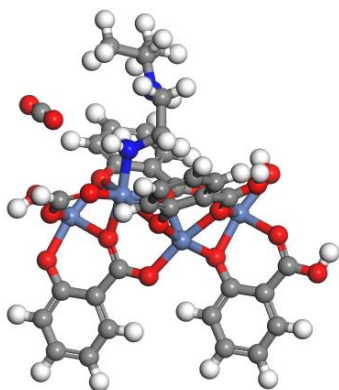

#### Ni-(B) Complex

-1 1

|    |             |             |             |
|----|-------------|-------------|-------------|
| H  | -7.83721600 | 2.32732900  | -0.86365800 |
| Ni | -2.60439400 | -1.81772100 | -1.49033500 |
| O  | -2.48906400 | -3.78105200 | -1.89461900 |
| O  | -3.06179400 | 0.06955200  | -1.09623200 |
| O  | -4.41239100 | -2.32709700 | -0.90523200 |
| O  | -6.62734200 | -2.27792300 | -0.68333800 |
| O  | -2.12979200 | -1.80189000 | 0.49088800  |
| O  | -2.69215300 | -3.79461900 | 1.31717000  |
| H  | -1.71601200 | -3.84633200 | -2.46888800 |
| C  | -4.30410700 | 0.58620500  | -1.05105100 |
| C  | -5.49814900 | -0.18922900 | -0.91512500 |
| C  | -6.74125200 | 0.46192000  | -0.84116900 |
| C  | -6.86780000 | 1.84667800  | -0.92454900 |
| C  | -5.68649300 | 2.59616700  | -1.10151100 |
| C  | -5.51679800 | -1.66979600 | -0.82279700 |
| C  | -1.59450700 | -3.25687700 | 3.77592900  |
| C  | -2.16265300 | -2.65418900 | 1.46284100  |
| H  | -1.01101200 | -3.84667300 | 5.77442300  |
| C  | 4.43955600  | -4.25421300 | -2.44507800 |

|    |             |             |             |
|----|-------------|-------------|-------------|
| H  | -7.61974500 | -0.16465300 | -0.68489000 |
| H  | -2.12250400 | -4.18418200 | 3.55248000  |
| H  | 2.41171300  | -3.55582800 | -1.27886600 |
| H  | 4.15823500  | -5.28785900 | -0.59098300 |
| H  | 3.57003700  | -4.71732100 | -2.92451700 |
| H  | 5.32861100  | -4.81556800 | -2.74580100 |
| H  | -2.87023000 | 6.71607400  | 0.33840200  |
| H  | -5.75626500 | 3.68030900  | -1.21249000 |
| Ni | 2.36218300  | 2.57232500  | -0.29028400 |
| Ni | -1.73030400 | 0.14007200  | 0.43100900  |
| Ni | 1.21978000  | 0.27966300  | 0.90317700  |
| O  | 2.43981500  | 0.71274700  | -0.77726700 |
| O  | 0.00998000  | -0.51600400 | -0.59554000 |
| O  | -0.91211200 | -1.36294800 | -2.44760500 |
| O  | 1.90526000  | 4.45834500  | 0.10408900  |
| O  | 0.57272600  | 2.07206700  | 0.37437000  |
| O  | -1.66013600 | 2.11037900  | 0.51662200  |
| O  | -0.77181800 | -0.10300000 | 2.07142400  |
| O  | 2.83755100  | 2.58662100  | 1.69101800  |
| O  | 2.06294900  | 0.69897700  | 2.63754500  |
| O  | 5.18375800  | -0.34888700 | 1.65237700  |
| O  | 6.49102900  | 0.23923500  | -0.18486200 |
| C  | 2.47186700  | 0.06982800  | -1.92388500 |
| C  | 1.36153500  | -0.62598500 | -2.50574100 |
| C  | 1.48171700  | -1.16883900 | -3.79683800 |
| C  | 2.65756700  | -1.08678900 | -4.53778700 |
| C  | 3.74658700  | -0.40922300 | -3.94941900 |
| C  | 3.65649500  | 0.15464400  | -2.69117600 |
| C  | 0.05879400  | -0.81800700 | -1.83243300 |
| C  | 0.66314800  | 4.97467600  | 0.14888100  |
| C  | -0.53090600 | 4.19924100  | 0.28497300  |
| C  | -1.77399100 | 4.85038800  | 0.35889800  |
| C  | -1.90054500 | 6.23514300  | 0.27547800  |
| C  | -0.71916300 | 6.98469800  | 0.09854000  |
| C  | -4.44388500 | 1.98888100  | -1.16487100 |
| C  | -0.54989900 | 2.71916800  | 0.37693500  |
| C  | -0.77903700 | -1.09207900 | 2.95347500  |
| C  | -1.53591500 | -2.29274000 | 2.75580100  |
| C  | -0.95734600 | -3.08758700 | 5.00313200  |
| C  | -0.25675900 | -1.87873800 | 5.20693100  |
| C  | -0.17442500 | -0.91014700 | 4.22144800  |
| C  | 2.80491300  | 1.73194600  | 2.66245900  |
| C  | 5.83449800  | -0.05091700 | 0.73213500  |
| C  | 1.53625800  | -2.66545200 | 1.10150700  |
| C  | 2.54526500  | -3.74369800 | 0.72868100  |
| C  | 4.29497600  | -4.24480100 | -0.92968500 |

|   |             |             |             |
|---|-------------|-------------|-------------|
| C | 5.55214300  | -3.68699900 | -0.27087300 |
| H | 0.59672700  | -1.64756400 | -4.21742600 |
| H | 4.50942400  | 0.66268700  | -2.23972700 |
| H | -2.65248900 | 4.22381400  | 0.51514000  |
| H | -3.53569000 | 2.57581200  | -1.30698700 |
| H | 0.22116900  | -1.70014900 | 6.17238600  |
| H | 0.36838200  | 0.02192400  | 4.38745300  |
| H | 1.12447200  | -2.84571200 | 2.09601100  |
| H | 2.05320100  | -4.72956200 | 0.76751000  |
| H | 0.70825000  | -2.65632000 | 0.38741500  |
| H | 2.80870000  | -1.36688500 | 0.26293700  |
| H | 3.34670900  | -3.76063900 | 1.47676900  |
| H | 2.77133600  | -1.23234800 | 1.88849200  |
| H | 4.53288300  | -3.23006400 | -2.82328100 |
| H | 6.41035400  | -4.33737900 | -0.46657100 |
| H | 5.44344800  | -3.59933400 | 0.81456900  |
| H | 5.77493600  | -2.69339300 | -0.67508600 |
| N | 2.17535800  | -1.33962500 | 1.06873200  |
| N | 3.12787300  | -3.43465300 | -0.56759500 |
| H | 2.73074000  | -1.51662900 | -5.53090300 |
| H | 4.69258700  | -0.35423200 | -4.49153300 |
| H | -0.78900900 | 8.06877600  | -0.01245900 |
| O | 4.05516400  | 3.02547600  | -1.24764900 |
| H | 4.25137000  | 3.87752800  | -0.83983600 |
| C | 0.52337200  | 6.37734700  | 0.03516400  |
| H | 3.41030900  | 1.89510800  | 3.56666100  |
| H | 1.43164000  | 6.96434200  | -0.10693600 |
| H | -2.55150600 | -4.37484500 | 2.07487500  |
| H | -6.46302800 | -3.23536900 | -0.66314700 |

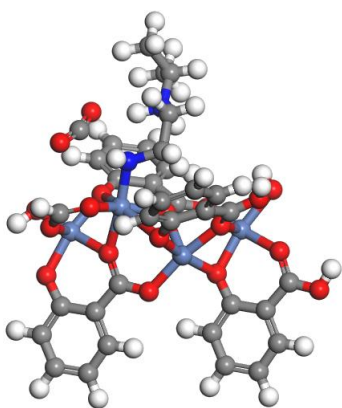

Ni-(C) TS<sub>1</sub>

|      |             |             |             |
|------|-------------|-------------|-------------|
| -1 1 |             |             |             |
| H    | -7.90551500 | 1.70516500  | -1.07872000 |
| Ni   | -2.33554700 | -2.01105500 | -1.42772800 |
| O    | -2.04939400 | -3.97267400 | -1.74644700 |
| O    | -2.95600600 | -0.15410100 | -1.12263200 |
| O    | -4.10829000 | -2.64532400 | -0.85698300 |

|    |             |             |             |
|----|-------------|-------------|-------------|
| O  | -6.32424900 | -2.77207100 | -0.68056200 |
| O  | -1.90940500 | -1.87557600 | 0.55993200  |
| O  | -2.32423300 | -3.87319500 | 1.45848400  |
| H  | -1.26518600 | -3.99335200 | -2.30880200 |
| C  | -4.23741700 | 0.25857100  | -1.12351600 |
| C  | -5.36621400 | -0.60758900 | -0.97826800 |
| C  | -6.66016800 | -0.05990200 | -0.95610100 |
| C  | -6.89858700 | 1.30497200  | -1.10031300 |
| C  | -5.77939800 | 2.14257600  | -1.28570500 |
| C  | -5.26475900 | -2.07960400 | -0.82390300 |
| C  | -1.33134000 | -3.14678400 | 3.91327100  |
| C  | -1.89410600 | -2.68763000 | 1.56617300  |
| H  | -0.74736800 | -3.60471600 | 5.94586800  |
| C  | 4.36919700  | -3.90008000 | -2.65904400 |
| H  | -7.48732200 | -0.75070700 | -0.79065800 |
| H  | -1.77577100 | -4.12316200 | 3.71892100  |
| H  | 2.42484100  | -3.00108000 | -1.23612300 |
| H  | 3.40429100  | -5.18008900 | -1.22184600 |
| H  | 3.46418900  | -3.71043400 | -3.24312500 |
| H  | 4.91906700  | -4.71283200 | -3.13903500 |
| H  | -3.34631200 | 6.53845300  | 0.03248400  |
| H  | -5.93581500 | 3.21174500  | -1.44369000 |
| Ni | 2.22309100  | 2.82276200  | -0.31752400 |
| Ni | -1.67023000 | 0.08891600  | 0.42592400  |
| Ni | 1.37001100  | 0.45865800  | 0.97535900  |
| O  | 2.44689600  | 0.96793200  | -0.74046700 |
| O  | 0.13865200  | -0.44634700 | -0.54995600 |
| O  | -0.66506000 | -1.45585700 | -2.37018700 |
| O  | 1.60320400  | 4.67851900  | -0.01209700 |
| O  | 0.46163100  | 2.20055500  | 0.31270800  |
| O  | -1.76483800 | 2.06005800  | 0.42963700  |
| O  | -0.72854400 | -0.01129500 | 2.09344700  |
| O  | 2.65012100  | 2.95677900  | 1.67029400  |
| O  | 1.98949600  | 1.07366900  | 2.72729500  |
| O  | 4.77744700  | 0.33983000  | 1.73048200  |
| O  | 4.99783700  | -1.11334700 | -0.06472900 |
| C  | 2.57627800  | 0.27409900  | -1.84158100 |
| C  | 1.54076800  | -0.53483800 | -2.41506900 |
| C  | 1.73488800  | -1.11756100 | -3.67951200 |
| C  | 2.91663300  | -0.96779300 | -4.40021300 |
| C  | 3.93226600  | -0.17853900 | -3.81986500 |
| C  | 3.76714500  | 0.42628700  | -2.58854100 |
| C  | 0.24322100  | -0.80742200 | -1.75976700 |
| C  | 0.32202900  | 5.09087100  | -0.01335200 |
| C  | -0.80678300 | 4.22471600  | 0.13206100  |
| C  | -2.10071900 | 4.77240100  | 0.15419800  |

|   |             |             |             |
|---|-------------|-------------|-------------|
| C | -2.33914200 | 6.13727000  | 0.00994600  |
| C | -1.21988400 | 6.97494700  | -0.17542300 |
| C | -4.48979800 | 1.63895100  | -1.29914900 |
| C | -0.70570400 | 2.75314900  | 0.28603400  |
| C | -0.67861700 | -0.95657700 | 3.01621100  |
| C | -1.32912600 | -2.22317600 | 2.85468800  |
| C | -0.73861400 | -2.87545300 | 5.14441500  |
| C | -0.14500600 | -1.60514600 | 5.31061400  |
| C | -0.12029800 | -0.67372300 | 4.28691300  |
| C | 2.66585000  | 2.14235700  | 2.67612800  |
| C | 4.69822100  | -0.42716000 | 0.85055700  |
| C | 1.75388500  | -2.33607100 | 1.19002700  |
| C | 2.68652800  | -3.45907300 | 0.75951500  |
| C | 4.04688900  | -4.29384200 | -1.22817500 |
| C | 5.29327400  | -4.54933000 | -0.39832300 |
| H | 0.90228500  | -1.68503100 | -4.09668000 |
| H | 4.56467800  | 1.02152400  | -2.14240800 |
| H | -2.92787700 | 4.08159300  | 0.31960400  |
| H | -3.63010500 | 2.29333400  | -1.44819200 |
| H | 0.29430400  | -1.34842200 | 6.27679800  |
| H | 0.33981200  | 0.30631200  | 4.42396800  |
| H | 1.29931800  | -2.67140300 | 2.13314200  |
| H | 2.17027500  | -4.42277400 | 0.73834300  |
| H | 0.93322200  | -2.27487500 | 0.46655800  |
| H | 3.75979800  | -2.32457100 | -0.56569300 |
| H | 3.54700500  | -3.53016300 | 1.42692400  |
| H | 2.69835800  | -0.94658800 | 2.27581900  |
| H | 4.99123100  | -3.00001200 | -2.69161000 |
| H | 5.89658200  | -5.30627700 | -0.90490200 |
| H | 5.06308600  | -4.92760800 | 0.59996000  |
| H | 5.89720800  | -3.64187100 | -0.30395700 |
| N | 2.41440700  | -1.04218000 | 1.30351100  |
| N | 3.21196400  | -3.20074300 | -0.61194000 |
| H | 3.04715400  | -1.42845600 | -5.37356900 |
| H | 4.88268000  | -0.06683500 | -4.34528200 |
| H | -1.37636900 | 8.04404500  | -0.33342700 |
| O | 3.89441100  | 3.37639900  | -1.25999600 |
| H | 4.01144000  | 4.25636600  | -0.88249300 |
| C | 0.06964800  | 6.47125000  | -0.18888200 |
| H | 3.26173700  | 2.40026100  | 3.56718000  |
| H | 0.92940800  | 7.12570400  | -0.33791100 |
| H | -2.15633000 | -4.40445500 | 2.24580500  |
| H | -6.08135700 | -3.71061800 | -0.61523100 |

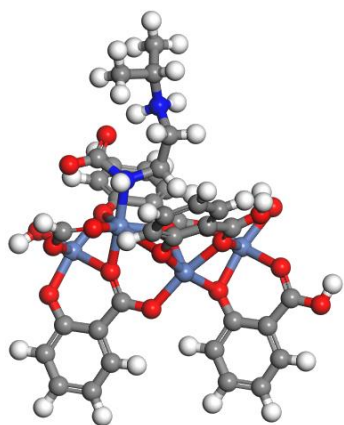

Ni-(D) Intermediate from Gaussian

-1 1

|    |             |             |             |
|----|-------------|-------------|-------------|
| H  | -8.21308400 | -0.03568700 | 0.02072100  |
| Ni | -2.09930500 | -2.26339900 | -1.59656100 |
| O  | -1.45134500 | -4.04738800 | -2.25150000 |
| O  | -3.04911000 | -0.65731200 | -0.92971300 |
| O  | -3.58196700 | -3.36293400 | -0.91582400 |
| O  | -5.66292900 | -4.02866700 | -0.48680400 |
| O  | -1.40583400 | -2.27906600 | 0.31905800  |
| O  | -1.23479100 | -4.41378800 | 0.93846500  |
| H  | -0.75660000 | -3.81528400 | -2.87995900 |
| C  | -4.37318600 | -0.56107200 | -0.70638900 |
| C  | -5.25201900 | -1.67975700 | -0.55904800 |
| C  | -6.61362400 | -1.45918300 | -0.29044500 |
| C  | -7.15978800 | -0.18175700 | -0.18842600 |
| C  | -6.29037000 | 0.91212000  | -0.37837200 |
| C  | -4.81322100 | -3.09396500 | -0.65082900 |
| C  | -0.04891600 | -3.78435800 | 3.33366900  |
| C  | -1.05844300 | -3.18307000 | 1.17596100  |
| H  | 0.93180100  | -4.34050500 | 5.18043100  |
| C  | 6.59732800  | -3.93393400 | -1.20881800 |
| H  | -7.23627800 | -2.34033000 | -0.13344200 |
| H  | -0.29766700 | -4.80604800 | 3.04578500  |
| H  | 4.17299700  | -3.35657300 | -1.33931600 |
| H  | 5.39288300  | -4.55847100 | 0.46087500  |
| H  | 6.07210500  | -4.56417000 | -1.93294500 |
| H  | 7.49078700  | -4.47167700 | -0.88358400 |
| H  | -4.68415100 | 5.55815100  | 1.29890300  |
| H  | -6.69601800 | 1.92551600  | -0.34634300 |
| Ni | 1.42861200  | 3.33157800  | -0.32002200 |
| Ni | -1.61909500 | -0.31247400 | 0.46543800  |
| Ni | 1.32906300  | 0.85021300  | 0.67539100  |
| O  | 1.98630200  | 1.62645300  | -1.02884200 |
| O  | 0.07072800  | -0.26930500 | -0.80625900 |
| O  | -0.75651400 | -1.21804400 | -2.64114000 |



|   |             |             |             |
|---|-------------|-------------|-------------|
| O | 0.47966800  | 4.93660500  | 0.34689200  |
| O | -0.02765800 | 2.25210000  | 0.42440900  |
| O | -2.13390500 | 1.56486600  | 0.78937000  |
| O | -0.39561300 | -0.39581600 | 1.94338300  |
| O | 2.12327800  | 3.31469100  | 1.59541300  |
| O | 1.93371400  | 1.25695600  | 2.48976000  |
| O | 4.47916100  | 1.10084500  | 0.98421100  |
| O | 4.58112600  | -0.36364300 | -0.71863700 |
| C | 2.07839500  | 1.14702100  | -2.25616900 |
| C | 1.16439000  | 0.19462000  | -2.81570200 |
| C | 1.27850500  | -0.16453200 | -4.16997400 |
| C | 2.27225300  | 0.34744400  | -4.99985800 |
| C | 3.17241100  | 1.27534100  | -4.43420800 |
| C | 3.07629400  | 1.66673500  | -3.11253900 |
| C | 0.07519200  | -0.45489200 | -2.05469500 |
| C | -0.84417000 | 5.03263800  | 0.56977300  |
| C | -1.72299300 | 3.91393300  | 0.71727800  |
| C | -3.08458500 | 4.13451400  | 0.98585000  |
| C | -3.63075800 | 5.41193900  | 1.08782900  |
| C | -2.76128500 | 6.50590000  | 0.89790900  |
| C | -4.94107500 | 0.73191200  | -0.63099000 |
| C | -1.28471500 | 2.50011800  | 0.62523000  |
| C | -0.03186900 | -1.40817200 | 2.71623700  |
| C | -0.41164600 | -2.76220600 | 2.44076100  |
| C | 0.65718400  | -3.53600400 | 4.50857500  |
| C | 0.98205100  | -2.19237200 | 4.79630100  |
| C | 0.64479400  | -1.16171800 | 3.93599000  |
| C | 2.47152900  | 2.40855600  | 2.45149300  |
| C | 4.06745500  | 0.17414100  | 0.29624600  |
| C | 2.40170200  | -1.72835500 | 0.15985700  |
| C | 3.34466100  | -2.88327700 | 0.47955600  |
| C | 5.72971200  | -3.62373700 | -0.00033400 |
| C | 6.45397400  | -2.76313000 | 1.02181400  |
| H | 0.53264100  | -0.85579700 | -4.56382600 |
| H | 3.78692400  | 2.37291600  | -2.68159300 |
| H | -3.70724700 | 3.25336800  | 1.14281600  |
| H | -4.27664600 | 1.58357500  | -0.78167700 |
| H | 1.50184600  | -1.96134500 | 5.72842300  |
| H | 0.89888100  | -0.12570400 | 4.16635700  |
| H | 1.40675000  | -1.98310600 | 0.52180300  |
| H | 2.81280500  | -3.83380000 | 0.40681200  |
| H | 2.31625200  | -1.59154800 | -0.91954400 |
| H | 4.67865000  | -1.88063400 | -0.69735100 |
| H | 3.74247100  | -2.80176400 | 1.49345200  |
| H | 2.84464300  | -0.51565800 | 1.76856000  |
| H | 6.91891900  | -3.01530100 | -1.70997400 |

|   |             |             |             |
|---|-------------|-------------|-------------|
| H | 7.34569500  | -3.29343100 | 1.36359500  |
| H | 5.84348400  | -2.54895200 | 1.90292600  |
| H | 6.76759000  | -1.81434400 | 0.57593600  |
| N | 2.76133900  | -0.42960400 | 0.75349000  |
| N | 4.49080300  | -2.91995100 | -0.47286500 |
| H | 2.34638700  | 0.05375700  | -6.04138000 |
| H | 3.98201600  | 1.67194000  | -5.04990000 |
| H | -3.16698600 | 7.51921400  | 0.92991600  |
| O | 2.77253900  | 4.37562600  | -1.36496100 |
| H | 2.77222300  | 5.19725700  | -0.85956000 |
| C | -1.41204300 | 6.32560800  | 0.64527300  |
| H | 3.20535200  | 2.64926300  | 3.23462800  |
| H | -0.74756200 | 7.17735400  | 0.49460200  |
| H | -0.84351300 | -4.98643500 | 1.60908600  |
| H | -5.21657900 | -4.88427800 | -0.59959900 |

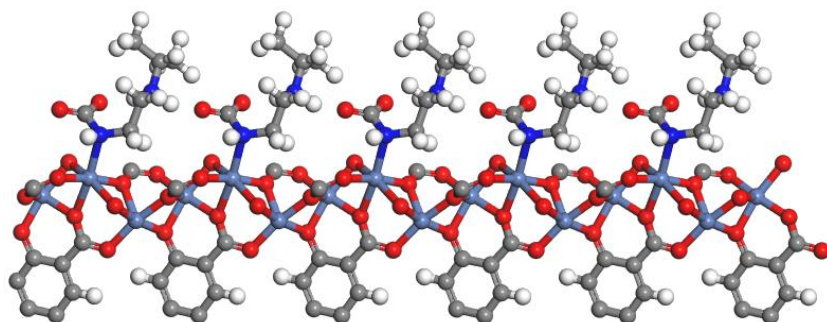

Ni-(D) Intermediate from VASP

|                      |                     |                     |  |
|----------------------|---------------------|---------------------|--|
| 1.000000000000000    |                     |                     |  |
| 20.9732495692851693  | 0.0641258509311663  | -0.0029439806039944 |  |
| -11.0930313545685930 | 18.8658363069542503 | -0.0104748729244909 |  |
| -0.0064096456803557  | -0.0094456191524481 | 6.7359227324520035  |  |

| Ni | O  | C  | H  | N |
|----|----|----|----|---|
| 6  | 20 | 48 | 32 | 2 |

Direct

|                    |                    |                    |
|--------------------|--------------------|--------------------|
| 0.3269850846141651 | 0.7392494756555834 | 0.8422512826810902 |
| 0.2678794229273151 | 0.6456932490551210 | 0.1774781435588082 |
| 0.3791377802054967 | 0.6868649816683643 | 0.5027432957649154 |
| 0.6929914314927004 | 0.3547029654109863 | 0.2289084237946426 |
| 0.5943214402151114 | 0.2947091919341887 | 0.8951436654685949 |
| 0.6307188880981016 | 0.3889767426104882 | 0.5622860290811786 |
| 0.4130203743039544 | 0.7803736774333174 | 0.6547500845090681 |
| 0.3594018204701683 | 0.7343464306297562 | 0.2752038241948611 |
| 0.3779668288476259 | 0.8149114999365636 | 0.0466784131083173 |
| 0.2313297345557856 | 0.6924017611940201 | 0.9846512617506562 |
| 0.2763574120665027 | 0.6795829538559985 | 0.6101268426314306 |
| 0.1905382025007469 | 0.6235030507886705 | 0.3777434090437168 |
| 0.3116115007654017 | 0.5957424941952567 | 0.3158425023419369 |
| 0.3307717167897337 | 0.6539379854580574 | 0.9478136426666595 |
| 0.3845834312882488 | 0.6227142068867693 | 0.7154352836724911 |

|                    |                    |                    |
|--------------------|--------------------|--------------------|
| 0.5576812126723567 | 0.7642667903749825 | 0.7089358944178059 |
| 0.5705574240362239 | 0.8322849041392288 | 0.4398907624725510 |
| 0.7269427162183248 | 0.4375307168207030 | 0.4206686531347756 |
| 0.6841101373979228 | 0.3829614024390224 | 0.7950591544935293 |
| 0.7699223934455546 | 0.4085249001506099 | 0.0261046389038952 |
| 0.6467448670884011 | 0.2622841837100722 | 0.0862900443296084 |
| 0.6326338961975750 | 0.3033314720410516 | 0.4609118874379661 |
| 0.5728645731793591 | 0.2211394802779196 | 0.6912591482840540 |
| 0.5440006758810654 | 0.3387497859677921 | 0.7530469458891815 |
| 0.6010066614713452 | 0.3522120776873905 | 0.1281544083734616 |
| 0.5755732245362566 | 0.4097102790726623 | 0.3586047124066951 |
| 0.4427096232717602 | 0.8443998884371240 | 0.5697986433003095 |
| 0.4332403183370630 | 0.8565679476840771 | 0.3656634353899975 |
| 0.4681751124460263 | 0.9261553333905184 | 0.2925726810009692 |
| 0.5135502442128157 | 0.9846705903655462 | 0.4100081274682665 |
| 0.5228230890158940 | 0.9719242002901254 | 0.6103194559801324 |
| 0.4883750540075198 | 0.9043150289334605 | 0.6878899165906631 |
| 0.3879702115852481 | 0.7997888555796209 | 0.2220027053669895 |
| 0.1640577542735002 | 0.6599117086714728 | 0.8994337022446572 |
| 0.1499712654457070 | 0.6368401116447799 | 0.6971717276957676 |
| 0.0770351104435179 | 0.6016077800672335 | 0.6256269702776436 |
| 0.0171306524546964 | 0.5893151586915479 | 0.7432509591352030 |
| 0.0320611144133380 | 0.6143525648435997 | 0.9405425830865113 |
| 0.1031414099445485 | 0.6486287213521464 | 0.0165410742728014 |
| 0.2082779533116721 | 0.6467054897959272 | 0.5546101896889297 |
| 0.3360280572979448 | 0.5565335493607932 | 0.2290211693945707 |
| 0.3575053966729271 | 0.5624891443484188 | 0.0250024564844722 |
| 0.3873406906167389 | 0.5220402301412577 | 0.9522586527309400 |
| 0.3960297028124558 | 0.4745884166690928 | 0.0706869091407469 |
| 0.3720442090655638 | 0.4670914924857001 | 0.2695933379343458 |
| 0.3426837023594729 | 0.5063280842648297 | 0.3462927717281445 |
| 0.3573810110850602 | 0.6152072085655647 | 0.8874335051760980 |
| 0.5454677028924877 | 0.7747113796524516 | 0.5329126777540125 |
| 0.5058084514950352 | 0.7046663036681124 | 0.2104159899711533 |
| 0.5857178368650153 | 0.7472899481357373 | 0.1362033905435496 |
| 0.7941430772626319 | 0.4728476601294318 | 0.5067472553406631 |
| 0.8093601644004309 | 0.4645946325881383 | 0.7092608307913935 |
| 0.8822385765365581 | 0.5029619216872376 | 0.7811648368452637 |
| 0.9410200121127446 | 0.5506764588061657 | 0.6639897601848332 |
| 0.9249151663178736 | 0.5597867824397227 | 0.4665317028311904 |
| 0.8539778502959834 | 0.5222488434170316 | 0.3901341287850002 |
| 0.7525613769433548 | 0.4164296964355430 | 0.8510394734164066 |
| 0.6161335879486245 | 0.1979804621606789 | 0.1721133400986261 |
| 0.5918153402713600 | 0.1834152659239621 | 0.3741465707106073 |
| 0.5584245154520033 | 0.1136833529121688 | 0.4457057300203786 |
| 0.5495294595898486 | 0.0572584367912441 | 0.3292922219246321 |

|                    |                    |                    |
|--------------------|--------------------|--------------------|
| 0.5759477644384390 | 0.0727104054357639 | 0.1325475497540936 |
| 0.6080439202998065 | 0.1406111539935893 | 0.0561102911653961 |
| 0.5986304480180209 | 0.2377893602249301 | 0.5163679980180831 |
| 0.5087299621302321 | 0.3691423820050588 | 0.8381268083091626 |
| 0.5180734926251631 | 0.3924864278266043 | 0.0403882227437151 |
| 0.4803299907100680 | 0.4260186080180404 | 0.1108842540868267 |
| 0.4320682953986505 | 0.4363725919995005 | 0.9927497837925614 |
| 0.4212244547357216 | 0.4108236227625071 | 0.7959535896519156 |
| 0.4581646669740422 | 0.3782854105819666 | 0.7209059560818005 |
| 0.5671923560598842 | 0.3850965257580654 | 0.1833643202089732 |
| 0.6785289664846488 | 0.8729495627143393 | 0.0153433371974003 |
| 0.6755868022916900 | 0.9360424770065165 | 0.9291840354835017 |
| 0.7303629839056427 | 0.8926398890734859 | 0.1931336783024236 |
| 0.4573585981661097 | 0.9330467081725331 | 0.1382414705365420 |
| 0.5594125469634932 | 0.0165289726971736 | 0.7051617180973508 |
| 0.4966372681210629 | 0.8950029523802741 | 0.8423224569649079 |
| 0.0685544329467973 | 0.5824947061440113 | 0.4728792042238226 |
| 0.9865530577265602 | 0.6075068208789176 | 0.0346414636049559 |
| 0.1142248359467644 | 0.6680604008866169 | 0.1690983773968355 |
| 0.4065373277767037 | 0.5311923265431631 | 0.7989514087359240 |
| 0.3761858426016005 | 0.4288368997218939 | 0.3645763235854957 |
| 0.3242315313824164 | 0.5001741626730194 | 0.5001474820009193 |
| 0.4842412981590769 | 0.6486118608346985 | 0.1772064137273190 |
| 0.5935145993928614 | 0.7213447558931065 | 0.0069068271255190 |
| 0.8916797880502898 | 0.4929479023815659 | 0.9338610606224975 |
| 0.9694596199615120 | 0.5982264829737147 | 0.3724615681908148 |
| 0.8422758305312783 | 0.5300046929999027 | 0.2373551018152327 |
| 0.5380710426336890 | 0.1047884732963311 | 0.5979188368076862 |
| 0.5718559360935700 | 0.0301266410794270 | 0.0387407096973860 |
| 0.6283989335829574 | 0.1517597539039599 | 0.9038350194902094 |
| 0.4916010306039809 | 0.4454825527628827 | 0.2633501141788344 |
| 0.3819011463507422 | 0.4159960137201253 | 0.7013089523955216 |
| 0.4490464655115787 | 0.3585508527897971 | 0.5686614576749065 |
| 0.4716168039145430 | 0.7201705897540691 | 0.1238936248764304 |
| 0.5700437882356368 | 0.8084812774005954 | 0.9376648026334209 |
| 0.5824968276812896 | 0.8363843327829343 | 0.1926023643341637 |
| 0.6249848713632602 | 0.7538077120406541 | 0.2534559862543162 |
| 0.4917315875573749 | 0.6681399270566786 | 0.5013224147197519 |
| 0.6943649904149893 | 0.8482301305824365 | 0.8973745877347454 |
| 0.6567514330298891 | 0.9598749848055306 | 0.0419542474500645 |
| 0.6384912672803864 | 0.9200832071763401 | 0.7999321348893602 |
| 0.7308781534958086 | 0.9767523561188298 | 0.8806819188065305 |
| 0.7856806506783727 | 0.9348868624857616 | 0.1499493161211376 |
| 0.7355663922204769 | 0.8479409601614449 | 0.2462299152837346 |
| 0.7109117242169845 | 0.9116756121463609 | 0.3172834995015990 |
| 0.4938936304357782 | 0.7094428129979633 | 0.4248509868216388 |

0.6006150741772771 0.8184873326319035 0.0701573431868283

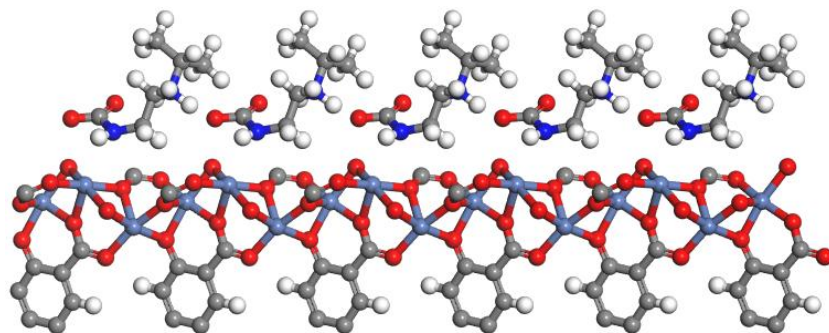

Ni-(E) TS<sub>2</sub>

|                      |                     |                    |
|----------------------|---------------------|--------------------|
| 1.0000000000000000   |                     |                    |
| 20.8674769200676522  | 0.0000000000000000  | 0.0000000000000000 |
| -10.9732632122313802 | 18.7387679429063816 | 0.0000000000000000 |
| 0.0028476176022594   | 0.0274361143842497  | 6.6804567081447326 |

| Ni | O  | C  | H  | N |
|----|----|----|----|---|
| 6  | 20 | 48 | 32 | 2 |

Direct

|                    |                    |                    |
|--------------------|--------------------|--------------------|
| 0.3288579181430862 | 0.7429176019487826 | 0.8304801167760516 |
| 0.2658477313291314 | 0.6484288408229446 | 0.1646598131591617 |
| 0.3720621996754687 | 0.6839692719834574 | 0.4925437077766901 |
| 0.6928841191659245 | 0.3593329043514473 | 0.2319324073069495 |
| 0.5938111370076626 | 0.2955159330612460 | 0.8986278606274212 |
| 0.6273164906277913 | 0.3906958103432743 | 0.5643129013746417 |
| 0.4157646708668423 | 0.7777362570195550 | 0.6433696354454099 |
| 0.3620012796188306 | 0.7348595696296911 | 0.2604694831097731 |
| 0.3835836813538549 | 0.8182304467597561 | 0.0340156445781332 |
| 0.2325091221749105 | 0.6999054417859156 | 0.9749708207528442 |
| 0.2758303204288453 | 0.6853871983997237 | 0.5955834921340610 |
| 0.1883323372203805 | 0.6276086614698855 | 0.3667812622976356 |
| 0.3069234917338619 | 0.5959275066847809 | 0.3056397065965086 |
| 0.3252219434126715 | 0.6525356999400316 | 0.9304463870341166 |
| 0.3783545809023749 | 0.6197783158501835 | 0.6971679566395466 |
| 0.5402689211232925 | 0.7476121376797451 | 0.5730807090097372 |
| 0.5783771856709166 | 0.8210976717834555 | 0.2981829377139675 |
| 0.7238805729366504 | 0.4435076433183482 | 0.4202148196652828 |
| 0.6818247764565157 | 0.3889029830776991 | 0.8014337590552785 |
| 0.7696947948455062 | 0.4153255692540512 | 0.0285947144282872 |
| 0.6511623479197794 | 0.2671530920902825 | 0.0877320353362023 |
| 0.6356815700730181 | 0.3064451146370857 | 0.4686410493662549 |
| 0.5743861546743432 | 0.2215697570757271 | 0.6959751971747181 |
| 0.5393801586313387 | 0.3353114478882944 | 0.7532531953648132 |
| 0.5959781711742522 | 0.3501186995561199 | 0.1348767845818770 |
| 0.5699727725414689 | 0.4094253804856649 | 0.3600972906463795 |
| 0.4484043173481282 | 0.8430679836401396 | 0.5597586298366650 |
| 0.4398310001314911 | 0.8572762684550526 | 0.3550832382717033 |

|                    |                    |                    |
|--------------------|--------------------|--------------------|
| 0.4755772350472043 | 0.9280182994892314 | 0.2849101004639891 |
| 0.5208161937771365 | 0.9859391823004486 | 0.4064149384754145 |
| 0.5296425040817994 | 0.9712471262608133 | 0.6068610203263489 |
| 0.4947823688756614 | 0.9022759310269706 | 0.6812586732431924 |
| 0.3931946350422564 | 0.8014460399824372 | 0.2093845794322746 |
| 0.1646896502841031 | 0.6682887666580299 | 0.8906906565699870 |
| 0.1494430958114634 | 0.6441081991747239 | 0.6880373608305064 |
| 0.0758964781662286 | 0.6093977762927096 | 0.6180334686461109 |
| 0.0164077641718805 | 0.5987195575559454 | 0.7375356927701944 |
| 0.0324723101744411 | 0.6250605481510902 | 0.9348408864786180 |
| 0.1041812848698100 | 0.6588880396018411 | 0.0093042463835573 |
| 0.2069319896176154 | 0.6522195019584274 | 0.5431066821782906 |
| 0.3303213893783337 | 0.5553143243426959 | 0.2189622598389320 |
| 0.3511008524959180 | 0.5600996593789560 | 0.0128282898319156 |
| 0.3794173498458022 | 0.5177920926257045 | 0.9408312380334678 |
| 0.3871796075813165 | 0.4697812443215668 | 0.0625118077818740 |
| 0.3632213780522591 | 0.4630820783565923 | 0.2632004363750653 |
| 0.3352959142072365 | 0.5040277587148054 | 0.3389724940934897 |
| 0.3514660552830478 | 0.6129565382899287 | 0.8716550865907919 |
| 0.5452367815257588 | 0.7608785425941988 | 0.3849850862777728 |
| 0.5210983543129686 | 0.6973164503694491 | 0.0532828825121356 |
| 0.6015578589741466 | 0.7462368167247533 | 0.9819375299433162 |
| 0.7915466373422575 | 0.4802362329580063 | 0.5052626855404299 |
| 0.8075226490792318 | 0.4720652022284426 | 0.7088097557185833 |
| 0.8809173830314165 | 0.5113039696770798 | 0.7796252418680751 |
| 0.9395661214585900 | 0.5599318090078214 | 0.6601122733391804 |
| 0.9227001694755188 | 0.5693423227312167 | 0.4619263819749833 |
| 0.8512119161336358 | 0.5309933342928304 | 0.3866883603185940 |
| 0.7510895704946350 | 0.4230914064119276 | 0.8533640928656183 |
| 0.6219475841552793 | 0.2021850498611215 | 0.1737440744639258 |
| 0.5963359741741527 | 0.1861271912210753 | 0.3765433255009185 |
| 0.5636009198295682 | 0.1154573055862755 | 0.4470986599692282 |
| 0.5569289099670556 | 0.0598283519654146 | 0.3287510042422284 |
| 0.5854004919545304 | 0.0770194507081712 | 0.1321255229817098 |
| 0.6167573574053051 | 0.1457580460508083 | 0.0566029290643399 |
| 0.6014814443809513 | 0.2397875600041033 | 0.5208361443180252 |
| 0.5022450995908372 | 0.3644294214995156 | 0.8374825696602599 |
| 0.5115445286612115 | 0.3890256112413013 | 0.0398576455607724 |
| 0.4726360823816620 | 0.4221788571172098 | 0.1079138715357217 |
| 0.4232267274990136 | 0.4307470479290245 | 0.9873772924026269 |
| 0.4118118388109195 | 0.4032146168926616 | 0.7914637688185664 |
| 0.4498789598508282 | 0.3710179661131505 | 0.7187138969562241 |
| 0.5615384067173750 | 0.3832961724760864 | 0.1855157915376822 |
| 0.6846049061418427 | 0.8708323651951630 | 0.8341628974341333 |
| 0.6756089283881721 | 0.9263449911135950 | 0.7162831343512579 |
| 0.7370675155090254 | 0.9026060090768269 | 0.0117403748196239 |

|                    |                    |                    |
|--------------------|--------------------|--------------------|
| 0.4652668020792206 | 0.9364235811740826 | 0.1300624081597164 |
| 0.5659856135307280 | 0.0154125923866459 | 0.7047537333579825 |
| 0.5023175197132588 | 0.8916797202648965 | 0.8365291576305935 |
| 0.0665780271799363 | 0.5892724331267374 | 0.4651836087826311 |
| 0.9873260157849444 | 0.6194695057002519 | 0.0303013939534509 |
| 0.1160123099634802 | 0.6792424122388638 | 0.1619549956634785 |
| 0.3986282412511386 | 0.5263265537354371 | 0.7859149127225962 |
| 0.3664156199200477 | 0.4241859134765491 | 0.3602946223276930 |
| 0.3169388196560945 | 0.4985949634987961 | 0.4942008463004441 |
| 0.5045585833129991 | 0.6420529790160074 | 0.0174512255313317 |
| 0.6147932555333497 | 0.7211969540070911 | 0.8590953040360887 |
| 0.8908852368262146 | 0.5010989935259573 | 0.9331050326514898 |
| 0.9671505373480187 | 0.6085609392558453 | 0.3662123003618660 |
| 0.8390515682022368 | 0.5389835945124588 | 0.2332040102528055 |
| 0.5419418619373246 | 0.1052002372525394 | 0.5996617837847396 |
| 0.5834842863382477 | 0.0351169575136652 | 0.0379712759394550 |
| 0.6385873782879230 | 0.1583137446778338 | 0.9042951277623175 |
| 0.4840126977042232 | 0.4429834038976850 | 0.2600979008729922 |
| 0.3713617537545986 | 0.4067168049392293 | 0.6957073626735522 |
| 0.4405524323456831 | 0.3498929458320532 | 0.5669653478541008 |
| 0.4853008519748769 | 0.7100397781014678 | 0.9613683781409179 |
| 0.5743368643702311 | 0.7971579783342975 | 0.7690944481749185 |
| 0.5895065966446822 | 0.8317780652161204 | 0.0192820722127394 |
| 0.6410819543280155 | 0.7588923703879118 | 0.1044348432224922 |
| 0.4931193695933231 | 0.6535603956495137 | 0.3433038518503153 |
| 0.7041426041281937 | 0.8439909395326239 | 0.7318026962860245 |
| 0.6545825320068346 | 0.9530197795500044 | 0.8136746656216616 |
| 0.6374301245591951 | 0.9018864559706969 | 0.5895849031592633 |
| 0.7297209315164679 | 0.9673294507582924 | 0.6569014287234651 |
| 0.7912313886373639 | 0.9455990437536883 | 0.9588283580945287 |
| 0.7460296179444796 | 0.8630968142184514 | 0.0900768267478824 |
| 0.7148901587909720 | 0.9250155807262104 | 0.1207343282682132 |
| 0.5066522461772465 | 0.6989438391805294 | 0.2663625838609889 |
| 0.6087140726149869 | 0.8136870623284551 | 0.9011392133907066 |

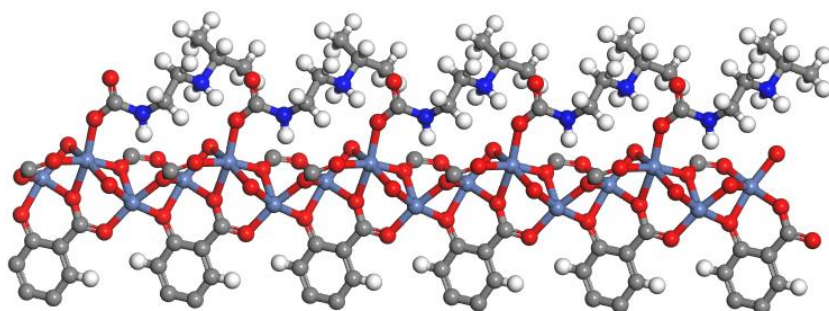

Ni-(F) Product

|                      |                     |                    |
|----------------------|---------------------|--------------------|
| 1.000000000000000    |                     |                    |
| 20.3698556776778190  | -0.2293983379148000 | 0.1086215780151701 |
| -11.1739947141693641 | 18.9500684391228198 | 0.0107995150608311 |

-0.0501608128425239 -0.0062925418651384 6.7293351036835194

Ni O C H N

6 20 48 32 2

Direct

|                    |                    |                    |
|--------------------|--------------------|--------------------|
| 0.3421241992554508 | 0.7476958113864827 | 0.8174510091263003 |
| 0.2748955695942371 | 0.6559443810619138 | 0.1552432417843807 |
| 0.3871139477268317 | 0.6898120488862490 | 0.4761735555234982 |
| 0.6903108529911306 | 0.3605393575234976 | 0.2217795291329347 |
| 0.5889450947576744 | 0.2931457034992327 | 0.8880599163900449 |
| 0.6194027985198752 | 0.3860822876257776 | 0.5545515152510657 |
| 0.4322934744286507 | 0.7844543573453683 | 0.6329101183187551 |
| 0.3717908190800682 | 0.7417627962390846 | 0.2555715313878958 |
| 0.4007538993829232 | 0.8236718724702606 | 0.0222774605560321 |
| 0.2435567795428484 | 0.7073361652377820 | 0.9607971519356140 |
| 0.2870757578253506 | 0.6887864365647071 | 0.5863531784920117 |
| 0.1962940729781555 | 0.6374671187205548 | 0.3549357508847409 |
| 0.3158258405834289 | 0.6034522780214922 | 0.2930560335045094 |
| 0.3396511628606370 | 0.6615817163604485 | 0.9286811056815031 |
| 0.3782806304850604 | 0.6191229680776410 | 0.6843605644294474 |
| 0.4971693125855468 | 0.7175166006603034 | 0.4156079341545373 |
| 0.6040132822504907 | 0.7248609957835551 | 0.2926571913222754 |
| 0.7186890116363979 | 0.4423819359089238 | 0.4119000285594321 |
| 0.6772723383547257 | 0.3870574622201898 | 0.7896947919332069 |
| 0.7682532973517218 | 0.4193181536593618 | 0.0184811956165448 |
| 0.6505668686716951 | 0.2687328690662178 | 0.0798764882758683 |
| 0.6319080888415298 | 0.3057271969884459 | 0.4566990136062669 |
| 0.5738770893076599 | 0.2211532230048815 | 0.6856624133240409 |
| 0.5296372785266217 | 0.3287540945643165 | 0.7441094534775844 |
| 0.5889703144581248 | 0.3454872648744296 | 0.1234798068112315 |
| 0.5587855498706878 | 0.4004587057474565 | 0.3493982899146539 |
| 0.4630996299262754 | 0.8492842464850104 | 0.5505849476912141 |
| 0.4547952194677378 | 0.8630985319305446 | 0.3464754972093910 |
| 0.4895572319398147 | 0.9335091622295618 | 0.2786201849943179 |
| 0.5334912893825366 | 0.9920296657830827 | 0.4005636382460918 |
| 0.5424274837156571 | 0.9780671820745187 | 0.6001705923193142 |
| 0.5086895741214569 | 0.9092611523593453 | 0.6725052911063554 |
| 0.4071043389181673 | 0.8071696490021525 | 0.1995557908498136 |
| 0.1735103877996849 | 0.6764238556698218 | 0.8765585084862401 |
| 0.1575103172297022 | 0.6525275212393015 | 0.6753730681929546 |
| 0.0814743596830893 | 0.6182129220498904 | 0.6058516178567360 |
| 0.0204622549065837 | 0.6073377321624576 | 0.7249894658630782 |
| 0.0375365178330405 | 0.6338635947517711 | 0.9206086211337098 |
| 0.1117085728519710 | 0.6676199754510809 | 0.9942272810757866 |
| 0.2163437638221267 | 0.6596733716205564 | 0.5320643013177258 |
| 0.3329375927578659 | 0.5587850078559214 | 0.2059117985118463 |
| 0.3514343099621408 | 0.5612405875303684 | 0.9997195093056003 |



|                    |                    |                    |
|--------------------|--------------------|--------------------|
| 0.3753039960802154 | 0.5159667479935424 | 0.9263776790392720 |
| 0.3798347101628006 | 0.4667470753365502 | 0.0469660991271569 |
| 0.3565480071244055 | 0.4616317190805608 | 0.2469714645911122 |
| 0.3334867388345484 | 0.5057943038384195 | 0.3241446327828323 |
| 0.3555612307410027 | 0.6152953758853656 | 0.8608831648055620 |
| 0.5400197890551268 | 0.7184200362661348 | 0.2676106637743407 |
| 0.5439859590106427 | 0.6978386576847317 | 0.9099109827662336 |
| 0.6172929881516936 | 0.7596982151006606 | 0.8226261002583070 |
| 0.7882866364403859 | 0.4819080246316081 | 0.4969199959880443 |
| 0.8055688972027903 | 0.4753653081259646 | 0.6995142114096794 |
| 0.8813289544853885 | 0.5174435661086161 | 0.7692035533559677 |
| 0.9408772989271381 | 0.5669985454571416 | 0.6494973476083483 |
| 0.9224693899046964 | 0.5749804646677112 | 0.4527098274079463 |
| 0.8486750519244106 | 0.5340043976042507 | 0.3786910025975422 |
| 0.7485048575065709 | 0.4249992467281928 | 0.8432966457755492 |
| 0.6246011972686053 | 0.2050993068663851 | 0.1665448547547030 |
| 0.5994371779639819 | 0.1883226158151534 | 0.3688512563124541 |
| 0.5703398336400562 | 0.1188268026412284 | 0.4401616410985076 |
| 0.5668959803550999 | 0.0651178909457354 | 0.3232546295246793 |
| 0.5948052753385917 | 0.0830794981466362 | 0.1270045352808881 |
| 0.6225956330619318 | 0.1506074624344733 | 0.0507541260985256 |
| 0.6009616247931935 | 0.2400922179584602 | 0.5112580549637916 |
| 0.4920912229372580 | 0.3579918533798117 | 0.8270779972690622 |
| 0.5013585382481579 | 0.3820418618284249 | 0.0282665019600703 |
| 0.4628193583694302 | 0.4158647039277785 | 0.0943437954508385 |
| 0.4136959084353977 | 0.4257981535549722 | 0.9729948282027853 |
| 0.4018422244527172 | 0.3985690977382122 | 0.7782400777413840 |
| 0.4395469932306713 | 0.3656145968623569 | 0.7075585170573138 |
| 0.5519131472743162 | 0.3762993005107290 | 0.1744595379518413 |
| 0.6717799446688251 | 0.8614299090631317 | 0.5774838148675250 |
| 0.6495030733046443 | 0.8930825182630772 | 0.4069994977492378 |
| 0.7258210064176801 | 0.9183761259374892 | 0.7239812409400007 |
| 0.4787119255507905 | 0.9411750271504684 | 0.1245757551271676 |
| 0.5776126545936519 | 0.0224878083367222 | 0.6994057136112023 |
| 0.5153894746702338 | 0.8994750938473726 | 0.8283107644583944 |
| 0.0712428540315196 | 0.5980632948490245 | 0.4541610097224557 |
| 0.9912755645557079 | 0.6283006439536407 | 0.0154199134369796 |
| 0.1244402669090138 | 0.6879610595449998 | 0.1457516028605892 |
| 0.3940024376264820 | 0.5231542509592962 | 0.7718700848677371 |
| 0.3569852685536454 | 0.4217315128801161 | 0.3430075510036444 |
| 0.3164004552052290 | 0.5020547005420539 | 0.4792991063821119 |
| 0.5573383640862070 | 0.6575242012596964 | 0.9578338009713933 |
| 0.6463935469362994 | 0.7390166105125212 | 0.7329795917055408 |
| 0.8926149415806900 | 0.5085110990135802 | 0.9216964471214519 |
| 0.9674724786418853 | 0.6149924503055803 | 0.3571005621415843 |
| 0.8351435785358802 | 0.5407173839874230 | 0.2263085827719089 |

|                    |                    |                    |
|--------------------|--------------------|--------------------|
| 0.5485294164579614 | 0.1077570196824744 | 0.5920408205005578 |
| 0.5953142912116748 | 0.0428218683934355 | 0.0335889056133798 |
| 0.6440655985459171 | 0.1638452608310814 | 0.8988017609929583 |
| 0.4749254975714275 | 0.4367037954377035 | 0.2452920402021163 |
| 0.3616239127517699 | 0.4031998263298964 | 0.6810946680756076 |
| 0.4301445639873215 | 0.3452056412837659 | 0.5562138616278858 |
| 0.5003655096443596 | 0.6741966977804376 | 0.7922164722392185 |
| 0.5596169786268826 | 0.7676779426650764 | 0.5740599632123204 |
| 0.5736601759218598 | 0.8251505220182072 | 0.7566919560821413 |
| 0.6556041206708243 | 0.7933907498644664 | 0.9414316511503575 |
| 0.4582158039371826 | 0.7064718770166575 | 0.0670106766338821 |
| 0.6257937644223781 | 0.9247570321237444 | 0.4614117949809603 |
| 0.6076562886901568 | 0.8520529878562481 | 0.3069464046714175 |
| 0.7012416231421912 | 0.9283398603326171 | 0.3199521224161017 |
| 0.6980664122712403 | 0.8328949663159534 | 0.5147591708537799 |
| 0.7757181890591895 | 0.9601364075112305 | 0.6431563549622750 |
| 0.7471903798785479 | 0.8977286392190033 | 0.8396844856469526 |
| 0.6973070622107671 | 0.9435575536171521 | 0.7959201144820203 |
| 0.5126771454377766 | 0.7166201749523617 | 0.0771708207604685 |
| 0.6011767375856537 | 0.8036923425485619 | 0.6828387906474410 |

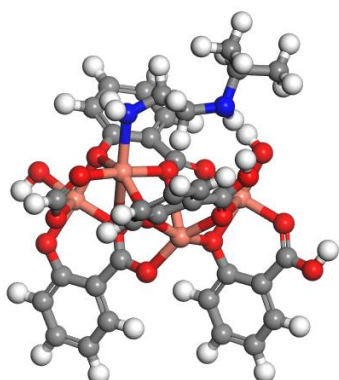

Cu-(A) i-2-MOF

-1 1

|    |    |             |            |             |
|----|----|-------------|------------|-------------|
| H  | 0  | 2.24719700  | 7.25984000 | -0.27880800 |
| Cu | -1 | -1.43843600 | 1.95952300 | -1.71625600 |
| O  | -1 | -3.28530100 | 1.30387600 | -2.01724600 |
| O  | -1 | -0.68357800 | 0.37566400 | -2.57516800 |
| O  | -1 | 0.32493700  | 2.41146100 | -0.98943300 |
| O  | -1 | -2.13319200 | 3.74619100 | -1.47344300 |
| O  | -1 | -2.26487600 | 5.65682500 | -0.34393500 |
| O  | -1 | -1.72387700 | 1.81432000 | 0.69010000  |
| O  | -1 | -3.89029000 | 1.35555500 | 0.97407400  |
| H  | -1 | -3.13544600 | 0.43492800 | -2.40605900 |
| C  | -1 | 0.77068900  | 3.67779100 | -0.88134700 |
| C  | -1 | -0.09288800 | 4.78908100 | -0.68609000 |
| C  | -1 | 0.45664800  | 6.05787200 | -0.44015600 |
| C  | -1 | 1.83730100  | 6.27265600 | -0.45901900 |

|    |    |             |             |             |
|----|----|-------------|-------------|-------------|
| C  | -1 | 2.67342100  | 5.18179600  | -0.75299600 |
| C  | -1 | 2.16168900  | 3.91091900  | -0.96429100 |
| C  | -1 | -1.57022400 | 4.69825000  | -0.82424200 |
| C  | -1 | -2.40076000 | 0.47994800  | 2.58193700  |
| C  | -1 | -3.46635700 | 0.29031300  | 3.47797700  |
| C  | -1 | -2.67064400 | 1.25042800  | 1.34473400  |
| C  | 0  | -3.72996900 | -1.99226200 | 0.59577200  |
| H  | 0  | -4.11108500 | -0.46131800 | 5.40127300  |
| C  | 0  | -5.78544900 | -1.71819900 | -0.77834800 |
| C  | 0  | -6.55765400 | -0.60674200 | -1.47757800 |
| H  | -1 | -0.23158000 | 6.87512200  | -0.22293400 |
| H  | -1 | -4.45505600 | 0.62954400  | 3.16822300  |
| H  | 0  | -4.21100300 | -0.44070600 | -0.62248200 |
| H  | 0  | -2.97805800 | -1.36989200 | 1.09005100  |
| H  | 0  | -4.21674600 | -2.56739400 | 1.39418300  |
| C  | 0  | -6.69542500 | -2.53437600 | 0.13048700  |
| H  | 0  | -5.38945300 | -2.39467600 | -1.55773800 |
| H  | 0  | -5.88679500 | 0.00408700  | -2.09203600 |
| H  | 0  | -7.02977700 | 0.05025800  | -0.73855600 |
| H  | 0  | -7.33838500 | -1.01924600 | -2.12326100 |
| N  | 0  | -4.70090400 | -1.09868900 | -0.01364400 |
| H  | 0  | 6.58899700  | 3.05148400  | 1.09340600  |
| Cu | -1 | 2.90055100  | -2.24901400 | -0.34185100 |
| Cu | -1 | 0.16230500  | 1.34930700  | 0.71225700  |
| Cu | 0  | -0.05704700 | -1.91828900 | 0.78966700  |
| O  | 0  | 1.11202600  | -2.82950100 | -0.66526400 |
| O  | 0  | -0.65926900 | -0.67700600 | -0.62361900 |
| O  | -1 | 3.65992200  | -3.83492400 | -1.19637400 |
| O  | -1 | 4.66392400  | -1.79707600 | 0.38487200  |
| O  | 0  | 2.22563000  | -0.46650600 | -0.08900600 |
| O  | -1 | 2.07411200  | 1.44828700  | 1.03047000  |
| O  | 0  | -0.15548400 | -0.11106100 | 1.98647700  |
| O  | -1 | 2.61511000  | -2.39421700 | 2.06440500  |
| O  | 0  | 0.44845600  | -2.98694600 | 2.36696300  |
| C  | -1 | 0.67885900  | -2.95398700 | -1.93067700 |
| C  | -1 | 0.02681000  | -1.87250600 | -2.58779900 |
| C  | -1 | -0.23870400 | -1.94633200 | -3.96524600 |
| C  | -1 | 0.03427500  | -3.10037800 | -4.70459800 |
| C  | -1 | 0.60107700  | -4.19294900 | -4.02876900 |
| C  | -1 | 0.92133700  | -4.12907400 | -2.68242400 |
| C  | -1 | -0.45948900 | -0.66338200 | -1.87301900 |
| C  | -1 | 5.10967600  | -0.53074600 | 0.49295700  |
| C  | -1 | 4.24609900  | 0.58054300  | 0.68831400  |
| C  | -1 | 4.79563600  | 1.84933500  | 0.93424900  |
| C  | -1 | 6.17630600  | 2.06421700  | 0.91538600  |
| C  | -1 | 7.01250700  | 0.97324000  | 0.62140900  |

|   |    |             |             |             |
|---|----|-------------|-------------|-------------|
| C | -1 | 6.50077500  | -0.29763700 | 0.41011400  |
| C | -1 | 2.76876300  | 0.48971300  | 0.55016300  |
| C | -1 | -1.10727100 | -0.03665800 | 2.89518700  |
| H | 0  | 1.90943600  | -3.46593400 | 3.67153900  |
| C | -1 | -3.28121000 | -0.32582700 | 4.71730600  |
| C | -1 | -1.97989600 | -0.73869700 | 5.05944600  |
| C | -1 | -0.91575900 | -0.59620100 | 4.18371700  |
| C | -1 | 1.66834300  | -2.95810900 | 2.71913900  |
| C | 0  | -2.95425200 | -2.94385600 | -0.31315800 |
| H | 0  | -1.99186100 | -3.81725000 | 1.26571000  |
| H | -1 | -0.66032700 | -1.06429900 | -4.44730100 |
| H | -1 | 1.37801700  | -4.98409500 | -2.18306900 |
| H | -1 | 4.10740700  | 2.66658500  | 1.15137100  |
| H | -1 | 3.74938200  | 5.34742600  | -0.82409500 |
| H | -1 | 2.81373300  | 3.06878800  | -1.19420700 |
| H | -1 | -1.80965600 | -1.17511600 | 6.04504600  |
| H | -1 | 0.08953700  | -0.91269000 | 4.46019000  |
| H | 0  | -2.65138900 | -2.41365200 | -1.22192200 |
| H | 0  | -3.57513800 | -3.79750100 | -0.61936400 |
| H | 0  | -1.27189600 | -4.09303100 | -0.14905300 |
| N | 0  | -1.73588100 | -3.36621400 | 0.39001200  |
| H | 0  | -0.18908400 | -3.15113600 | -5.76464300 |
| H | -1 | 0.78520800  | -5.11352700 | -4.58313400 |
| H | 0  | 4.55665200  | -3.77848000 | -0.84068700 |
| H | -1 | 8.08836900  | 1.13888900  | 0.55031000  |
| H | -1 | 7.15272000  | -1.13974900 | 0.18019800  |
| H | -1 | -4.56309200 | 0.79478200  | 1.37910100  |
| H | 0  | -3.19988400 | 5.51990400  | -0.56981000 |
| H | 0  | -6.16724000 | -3.37146600 | 0.59731600  |
| H | 0  | -7.53029400 | -2.94940900 | -0.44225200 |
| H | 0  | -7.10135500 | -1.89965300 | 0.92596900  |

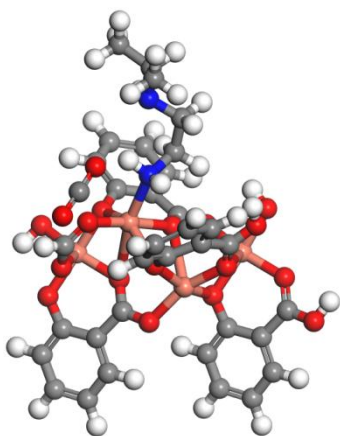

Cu-(B) Complex

|    |    |            |             |             |
|----|----|------------|-------------|-------------|
| -1 | 1  |            |             |             |
| H  | 0  | 7.67051200 | -2.39010900 | -0.94203200 |
| Cu | -1 | 1.59706800 | -2.59181400 | 1.68894400  |

|    |    |             |             |             |
|----|----|-------------|-------------|-------------|
| O  | -1 | 0.13617800  | -3.86303600 | 2.17310400  |
| O  | -1 | 2.78940100  | -1.34024000 | 0.73877900  |
| O  | -1 | 2.64529600  | -4.13465500 | 1.19388300  |
| O  | -1 | 3.91104100  | -5.28523600 | -0.22279900 |
| O  | -1 | 0.88992800  | -2.66655200 | -0.65930800 |
| O  | -1 | -0.67562200 | -4.24304400 | -0.60891800 |
| H  | 0  | -0.42264200 | -3.31911800 | 2.74175800  |
| C  | -1 | 4.04414100  | -1.66574200 | 0.37227600  |
| C  | -1 | 4.45091800  | -2.99469400 | 0.06533500  |
| C  | -1 | 5.74232100  | -3.22748300 | -0.43413800 |
| C  | -1 | 6.67213000  | -2.19354500 | -0.56841000 |
| C  | -1 | 6.28484700  | -0.90026500 | -0.17567500 |
| C  | -1 | 3.60515400  | -4.18207800 | 0.34415200  |
| C  | -1 | -1.94729900 | -3.24218800 | -2.83830400 |
| C  | -1 | -0.23379100 | -3.13875500 | -1.06354300 |
| C  | 0  | -7.09775400 | -1.38321100 | 0.94168900  |
| C  | 0  | -8.04940200 | -0.25760900 | 1.32439700  |
| H  | -1 | 5.99794100  | -4.24791800 | -0.72114900 |
| H  | -1 | -2.12528800 | -4.26086700 | -2.49277000 |
| H  | 0  | -4.79530100 | -2.58518100 | 2.01651200  |
| H  | 0  | -5.65888200 | -0.35664800 | 1.92898000  |
| H  | 0  | -7.27776500 | -2.23272800 | 1.62778800  |
| H  | 0  | -7.89465400 | 0.60845800  | 0.67155300  |
| H  | 0  | -7.88986400 | 0.06291300  | 2.35998300  |
| H  | 0  | -9.09042300 | -0.57889200 | 1.22918300  |
| H  | 0  | 6.31565400  | 3.62148000  | -1.95649700 |
| H  | -1 | 7.01701400  | -0.09306800 | -0.22649000 |
| Cu | -1 | 0.24034600  | 3.41737500  | 0.67270500  |
| Cu | -1 | 1.50684100  | -0.83733300 | -0.73580700 |
| Cu | 0  | -1.28796800 | 0.73962500  | -0.25556200 |
| O  | 0  | -1.13343200 | 2.15158700  | 1.16684500  |
| O  | 0  | -0.25080200 | -0.45499400 | 0.95064200  |
| O  | -1 | 0.81920400  | -1.15578100 | 2.75758700  |
| O  | -1 | 1.43256000  | 4.66885800  | -0.27755900 |
| O  | 0  | 1.30251400  | 1.89291700  | 0.17448000  |
| O  | -1 | 2.55419600  | 0.72386200  | -1.23913900 |
| O  | 0  | -0.11279700 | -0.28289300 | -1.73283300 |
| O  | -1 | -0.46692300 | 3.34266600  | -1.67562200 |
| O  | 0  | -2.20308700 | 1.87017100  | -1.59357600 |
| O  | 0  | -3.94634400 | 1.88077700  | -4.15001700 |
| O  | 0  | -4.95701500 | 0.67113800  | -2.43356400 |
| C  | -1 | -1.31696500 | 1.80620700  | 2.45552300  |
| C  | -1 | -0.67118800 | 0.66766900  | 3.01197400  |
| C  | -1 | -0.74061900 | 0.43451200  | 4.39493000  |
| C  | -1 | -1.49622300 | 1.25596200  | 5.23379800  |
| C  | -1 | -2.18844600 | 2.33642000  | 4.65760500  |

|   |    |             |             |             |
|---|----|-------------|-------------|-------------|
| C | -1 | -2.10730600 | 2.61136900  | 3.30472100  |
| C | -1 | 0.00401100  | -0.35859700 | 2.18552000  |
| C | -1 | 2.68731000  | 4.34345600  | -0.64396600 |
| C | -1 | 3.09408500  | 3.01450300  | -0.95100700 |
| C | -1 | 4.38547800  | 2.78161500  | -1.45047800 |
| C | -1 | 5.31519700  | 3.81566200  | -1.58474900 |
| C | -1 | 4.92801400  | 5.10893200  | -1.19201700 |
| C | -1 | 5.00558400  | -0.63382000 | 0.28646700  |
| C | -1 | 2.24832300  | 1.82712100  | -0.67219000 |
| C | -1 | -0.82176800 | -1.10124100 | -2.47983800 |
| C | -1 | -1.01781000 | -2.46602100 | -2.12792100 |
| C | -1 | -2.63615800 | -2.73349100 | -3.94187500 |
| C | -1 | -2.35895100 | -1.41252100 | -4.33955300 |
| C | -1 | -1.47281400 | -0.61147000 | -3.63663800 |
| C | -1 | -1.59062200 | 2.87031200  | -2.07980700 |
| C | 0  | -4.42709400 | 1.27957600  | -3.27499400 |
| C | 0  | -3.32017500 | -1.30394400 | 1.09111600  |
| C | 0  | -4.70455300 | -1.93666100 | 1.12643500  |
| H | 0  | -3.34533200 | -3.34670600 | -4.48556000 |
| H | -1 | -0.17900000 | -0.40899400 | 4.79680900  |
| H | -1 | -2.66550500 | 3.43227400  | 2.85772200  |
| H | -1 | 4.64110800  | 1.76128000  | -1.73749000 |
| H | -1 | 4.71275700  | 0.36986100  | 0.59327000  |
| H | -1 | -2.84778100 | -1.01866800 | -5.23161300 |
| H | -1 | -1.25864500 | 0.40846800  | -3.95437100 |
| H | 0  | -2.54671000 | -2.07512400 | 1.15849400  |
| H | 0  | -3.18997600 | -0.65594100 | 1.96709300  |
| H | 0  | -3.90735700 | 0.09325100  | -0.23968700 |
| H | 0  | -4.81607700 | -2.58850000 | 0.25149100  |
| H | 0  | -3.09790200 | -1.11625300 | -0.91766400 |
| C | 0  | -7.37121200 | -1.85775300 | -0.48173600 |
| N | 0  | -3.08722900 | -0.49717000 | -0.10902800 |
| N | 0  | -5.72216300 | -0.89781000 | 1.06979100  |
| H | 0  | -1.55533900 | 1.06159100  | 6.29920200  |
| H | -1 | -2.82050500 | 2.95506300  | 5.29604100  |
| H | -1 | 5.66018200  | 5.91612900  | -1.24283100 |
| O | -1 | -0.53753000 | 4.85340500  | 1.74114400  |
| H | 0  | -0.10780800 | 5.61315900  | 1.32737000  |
| C | -1 | 3.64875200  | 5.37537800  | -0.72987500 |
| H | 0  | -2.09171000 | 3.36365800  | -2.93351500 |
| H | -1 | 3.35591400  | 6.37895900  | -0.42306900 |
| H | 0  | -1.59608800 | -4.39664300 | -0.85717800 |
| H | 0  | 3.33022900  | -5.98813800 | 0.11272700  |
| H | 0  | -6.71848600 | -2.68548000 | -0.77463200 |
| H | 0  | -7.21513100 | -1.03551500 | -1.18822700 |
| H | 0  | -8.40454900 | -2.20614700 | -0.57502400 |

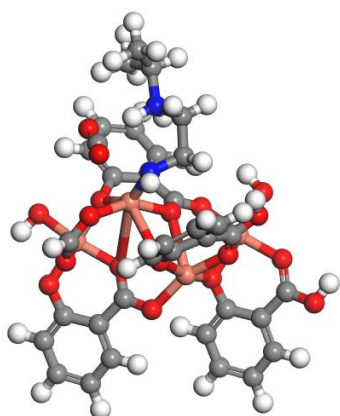

Cu-(C) TS<sub>1</sub>

-1 1

|    |    |             |             |             |
|----|----|-------------|-------------|-------------|
| H  | 0  | -7.95093400 | -1.37569400 | -0.43264100 |
| Cu | -1 | -1.54697600 | -2.39602200 | -1.77401700 |
| O  | -1 | -0.19820300 | -3.85277200 | -1.98212900 |
| O  | -1 | -2.73380200 | -0.99376600 | -1.05550300 |
| O  | -1 | -2.86846800 | -3.78331100 | -1.54254000 |
| O  | -1 | -4.53860900 | -4.75061300 | -0.44362000 |
| O  | -1 | -1.35372900 | -2.55980300 | 0.66644300  |
| O  | -1 | -0.03291200 | -4.33211700 | 0.89635700  |
| H  | 0  | 0.54917900  | -3.38260200 | -2.37107600 |
| C  | -1 | -4.06868900 | -1.14717700 | -0.96100200 |
| C  | -1 | -4.70132000 | -2.40893900 | -0.77743400 |
| C  | -1 | -6.08691300 | -2.46538900 | -0.55794000 |
| C  | -1 | -6.88006900 | -1.31573500 | -0.58991400 |
| C  | -1 | -6.25347700 | -0.08700400 | -0.86229600 |
| C  | -1 | -3.98016300 | -3.69965400 | -0.90801900 |
| C  | -1 | 0.87396100  | -3.50607500 | 3.36305000  |
| C  | -1 | -0.40940800 | -3.17755600 | 1.27918900  |
| C  | 0  | 5.94940100  | -1.49516300 | -1.76864700 |
| C  | 0  | 6.05591100  | -0.32337100 | -2.72823400 |
| H  | -1 | -6.52816900 | -3.44168300 | -0.35521900 |
| H  | -1 | 0.98336600  | -4.54004700 | 3.03524900  |
| H  | 0  | 4.28658700  | -3.42553800 | -0.72055000 |
| H  | 0  | 3.89309500  | -1.25710700 | -1.70081800 |
| H  | 0  | 5.86803300  | -2.43053200 | -2.33139800 |
| H  | 0  | 6.12385500  | 0.62550000  | -2.18670200 |
| H  | 0  | 5.20047300  | -0.27438100 | -3.40814900 |
| H  | 0  | 6.96045800  | -0.43559700 | -3.33023200 |
| H  | 0  | -6.05413700 | 4.40229900  | 0.98855600  |
| H  | -1 | -6.86755600 | 0.81129500  | -0.94138000 |
| Cu | -1 | 0.35122200  | 3.37908200  | -0.34967800 |
| Cu | -1 | -1.72683600 | -0.66420700 | 0.66202400  |
| Cu | 0  | 1.70165700  | 0.43236100  | 0.64726300  |
| O  | 0  | 1.61205900  | 1.93792400  | -0.59043300 |
| O  | 0  | 0.44588800  | -0.54626800 | -0.62238900 |

|   |    |             |             |             |
|---|----|-------------|-------------|-------------|
| O | -1 | -0.38394100 | -1.07960600 | -2.62461800 |
| O | -1 | -0.83550500 | 4.78134900  | 0.36883800  |
| O | 0  | -1.00713500 | 2.01361100  | -0.15400400 |
| O | -1 | -2.64031200 | 1.02450200  | 0.98072100  |
| O | 0  | -0.42569300 | -0.35490500 | 2.06860100  |
| O | -1 | 0.54455800  | 3.21541100  | 2.09078200  |
| O | 0  | 2.14077600  | 1.59665300  | 2.27794700  |
| O | 0  | 4.76607500  | 0.08817400  | 3.03875000  |
| O | 0  | 5.09538200  | 0.86334900  | 0.87091800  |
| C | -1 | 2.01572200  | 1.56976300  | -1.81790500 |
| C | -1 | 1.35384700  | 0.52687000  | -2.52307000 |
| C | -1 | 1.67473600  | 0.28349500  | -3.86834300 |
| C | -1 | 2.68812500  | 0.99436700  | -4.51426300 |
| C | -1 | 3.38324500  | 1.97350200  | -3.78176700 |
| C | -1 | 3.06264800  | 2.25981500  | -2.46726900 |
| C | -1 | 0.39398100  | -0.39767900 | -1.87812100 |
| C | -1 | -2.17039200 | 4.62793700  | 0.46333900  |
| C | -1 | -2.80302300 | 3.36617600  | 0.64690700  |
| C | -1 | -4.18871600 | 3.30971600  | 0.86639900  |
| C | -1 | -4.98167500 | 4.45939200  | 0.83453000  |
| C | -1 | -4.35519100 | 5.68821000  | 0.56204300  |
| C | -1 | -4.88285200 | 0.00440900  | -1.04689200 |
| C | -1 | -2.08196500 | 2.07545000  | 0.51631900  |
| C | -1 | 0.13811900  | -1.23428000 | 2.83708000  |
| C | -1 | 0.22083400  | -2.61376700 | 2.49794500  |
| C | -1 | 1.38208200  | -3.09184400 | 4.59646700  |
| C | -1 | 1.20543800  | -1.74479100 | 4.96271900  |
| C | -1 | 0.59619000  | -0.83359600 | 4.11444100  |
| C | -1 | 1.48890000  | 2.59746000  | 2.70353200  |
| C | 0  | 4.78652700  | 0.38351400  | 1.90696100  |
| C | 0  | 2.93364400  | -2.23594600 | 0.52908400  |
| C | 0  | 4.28732800  | -2.51299400 | -0.11787700 |
| H | 0  | 1.87193300  | -3.79494900 | 5.26042600  |
| H | -1 | 1.10165100  | -0.47794600 | -4.39770900 |
| H | -1 | 3.62017800  | 2.99930600  | -1.89499900 |
| H | -1 | -4.62987200 | 2.33343100  | 1.06912200  |
| H | -1 | -4.40354400 | 0.95916700  | -1.26183100 |
| H | -1 | 1.54801400  | -1.41810000 | 5.94550900  |
| H | -1 | 0.45752800  | 0.20647600  | 4.40764500  |
| H | 0  | 2.74666600  | -3.09115700 | 1.19281700  |
| H | 0  | 2.16462700  | -2.28801900 | -0.25900900 |
| H | 0  | 4.63984700  | -0.52302700 | -0.43948800 |
| H | 0  | 5.06752500  | -2.58046700 | 0.64185200  |
| H | 0  | 2.81729700  | -1.14747200 | 2.21279000  |
| C | 0  | 7.12099800  | -1.56674600 | -0.80495900 |
| N | 0  | 2.89694600  | -0.96337900 | 1.21907800  |



|   |    |             |             |             |
|---|----|-------------|-------------|-------------|
| N | 0  | 4.64661500  | -1.37905800 | -1.01817700 |
| H | 0  | 2.93776000  | 0.79310700  | -5.55049000 |
| H | -1 | 4.20883400  | 2.50033800  | -4.26176400 |
| H | -1 | -4.96935900 | 6.58640000  | 0.48295800  |
| O | -1 | 1.51435600  | 4.69550900  | -1.20027700 |
| H | 0  | 1.11120500  | 5.50534200  | -0.86284700 |
| C | -1 | -2.98446600 | 5.77963400  | 0.37744900  |
| H | 0  | 1.77855900  | 2.96327300  | 3.71107400  |
| H | -1 | -2.50534700 | 6.73427100  | 0.16250800  |
| H | 0  | 0.76673400  | -4.61779500 | 1.35495400  |
| H | 0  | -3.99794400 | -5.52469000 | -0.67221200 |
| H | 0  | 8.04500300  | -1.60221000 | -1.38672100 |
| H | 0  | 7.09527400  | -2.45838300 | -0.17514600 |
| H | 0  | 7.15909800  | -0.67954400 | -0.16532300 |

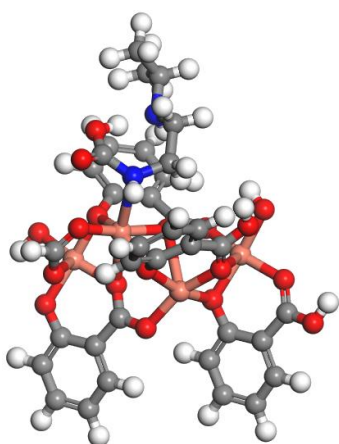

Cu-(D) Intermediate from Gaussian

|      |    |             |             |             |
|------|----|-------------|-------------|-------------|
| -1 1 |    |             |             |             |
| H    | 0  | -7.77245700 | -1.89172500 | -0.64064200 |
| Cu   | -1 | -1.27360900 | -2.49933100 | -1.75578000 |
| O    | -1 | 0.17593000  | -3.86485300 | -1.89268600 |
| O    | -1 | -2.57481100 | -1.16855400 | -1.10244100 |
| O    | -1 | -2.50612900 | -3.96856400 | -1.54038100 |
| O    | -1 | -4.14345700 | -5.02790400 | -0.47732000 |
| O    | -1 | -1.15110600 | -2.60848500 | 0.69233100  |
| O    | -1 | 0.27708800  | -4.28341300 | 0.99826500  |
| H    | 0  | 0.89100200  | -3.36340300 | -2.30360700 |
| C    | -1 | -3.89887000 | -1.41012200 | -1.04795500 |
| C    | -1 | -4.45133500 | -2.70849100 | -0.86072400 |
| C    | -1 | -5.83660300 | -2.85471200 | -0.68480600 |
| C    | -1 | -6.70341100 | -1.76203800 | -0.76407000 |
| C    | -1 | -6.15184800 | -0.49846200 | -1.03965900 |
| C    | -1 | -3.64146300 | -3.94959700 | -0.94353700 |
| C    | -1 | 1.04400400  | -3.35641600 | 3.47653300  |
| C    | -1 | -0.18838400 | -3.15062600 | 1.34676600  |
| C    | 0  | 5.96047400  | -1.42270600 | -1.84548100 |
| C    | 0  | 5.97122900  | -0.48613100 | -3.04314800 |

|    |    |             |             |             |
|----|----|-------------|-------------|-------------|
| H  | -1 | -6.21802600 | -3.85496500 | -0.47778600 |
| H  | -1 | 1.23324200  | -4.38613100 | 3.17216500  |
| H  | 0  | 4.35089800  | -3.16828000 | -0.47892900 |
| H  | 0  | 3.95261700  | -1.07820800 | -1.66651400 |
| H  | 0  | 5.91916900  | -2.46203500 | -2.21097000 |
| H  | 0  | 6.01482900  | 0.55803300  | -2.71624200 |
| H  | 0  | 5.07477600  | -0.61082700 | -3.65864300 |
| H  | 0  | 6.84385600  | -0.68709000 | -3.67037300 |
| H  | 0  | -6.31494800 | 4.02391900  | 0.73183400  |
| H  | -1 | -6.82179600 | 0.35479600  | -1.15547900 |
| Cu | -1 | 0.18669500  | 3.41512100  | -0.38179000 |
| Cu | -1 | -1.65000300 | -0.74264500 | 0.63986100  |
| Cu | 0  | 1.08423500  | 0.74725600  | 0.86742500  |
| O  | 0  | 1.55229000  | 2.06579300  | -0.55027800 |
| O  | 0  | 0.50075000  | -0.48821100 | -0.57077100 |
| O  | -1 | -0.17349000 | -1.12175200 | -2.59366900 |
| O  | -1 | -1.11670100 | 4.74427000  | 0.27162500  |
| O  | 0  | -1.04572300 | 1.95897600  | -0.14387400 |
| O  | -1 | -2.68467200 | 0.88547100  | 0.89684900  |
| O  | 0  | -0.29270100 | -0.29060000 | 1.99799300  |
| O  | -1 | 0.30788400  | 3.30515200  | 2.06645000  |
| O  | 0  | 1.84245900  | 1.68167600  | 2.39657800  |
| O  | 0  | 4.48807400  | 0.50734000  | 3.01988400  |
| O  | 0  | 5.01004700  | 0.52958500  | 0.86523100  |
| C  | -1 | 2.01512100  | 1.69707500  | -1.76165300 |
| C  | -1 | 1.44876900  | 0.59956600  | -2.46639800 |
| C  | -1 | 1.82940600  | 0.35603400  | -3.79625800 |
| C  | -1 | 2.81402900  | 1.12282500  | -4.42284400 |
| C  | -1 | 3.41684300  | 2.15888400  | -3.68701500 |
| C  | -1 | 3.03424100  | 2.44526000  | -2.38949200 |
| C  | -1 | 0.53053600  | -0.37665400 | -1.83542600 |
| C  | -1 | -2.44008500 | 4.50315700  | 0.32641900  |
| C  | -1 | -2.99254100 | 3.20478000  | 0.51345000  |
| C  | -1 | -4.37792100 | 3.05864600  | 0.68936400  |
| C  | -1 | -5.24464300 | 4.15143200  | 0.61020200  |
| C  | -1 | -4.69306700 | 5.41490700  | 0.33451500  |
| C  | -1 | -4.78500900 | -0.31773500 | -1.18179600 |
| C  | -1 | -2.18286700 | 1.96373800  | 0.43093100  |
| C  | -1 | 0.17563900  | -1.14890700 | 2.88403800  |
| C  | -1 | 0.36181200  | -2.52492000 | 2.57409700  |
| C  | -1 | 1.48191400  | -2.88823100 | 4.71752200  |
| C  | -1 | 1.20332600  | -1.55015100 | 5.05218800  |
| C  | -1 | 0.56305200  | -0.69672900 | 4.16762200  |
| C  | -1 | 1.26968500  | 2.76250200  | 2.72154500  |
| C  | 0  | 4.26284500  | 0.13251400  | 1.88132000  |
| C  | 0  | 3.17853300  | -1.87119400 | 0.72920500  |

|   |    |             |             |             |
|---|----|-------------|-------------|-------------|
| C | 0  | 4.45938400  | -2.17113900 | -0.02876600 |
| H | 0  | 2.00172600  | -3.54307600 | 5.40685800  |
| H | -1 | 1.32655400  | -0.45107300 | -4.32913300 |
| H | -1 | 3.52193300  | 3.22993400  | -1.81363800 |
| H | -1 | -4.75923500 | 2.05830400  | 0.89639100  |
| H | -1 | -4.36391900 | 0.66333200  | -1.39945100 |
| H | -1 | 1.49033400  | -1.18456400 | 6.03913300  |
| H | -1 | 0.34518400  | 0.33644300  | 4.43636100  |
| H | 0  | 2.99724900  | -2.73880000 | 1.37003100  |
| H | 0  | 2.34456900  | -1.81520700 | 0.02030600  |
| H | 0  | 4.84725000  | -0.00048000 | -0.01050800 |
| H | 0  | 5.30233300  | -2.22226200 | 0.66734500  |
| H | 0  | 2.71185700  | -0.87722300 | 2.48363900  |
| C | 0  | 7.22253200  | -1.25363800 | -1.00755700 |
| N | -1 | 3.15224500  | -0.67171600 | 1.59501800  |
| N | 0  | 4.75191700  | -1.15399700 | -1.04010500 |
| H | 0  | 3.11082000  | 0.92060300  | -5.44616000 |
| H | -1 | 4.22107500  | 2.73205400  | -4.15042400 |
| H | -1 | -5.36301500 | 6.26816500  | 0.21869500  |
| O | -1 | 1.28501100  | 4.79160300  | -1.21931600 |
| H | 0  | 0.81838300  | 5.58036100  | -0.91394400 |
| C | -1 | -3.32622800 | 5.59563400  | 0.19237800  |
| H | 0  | 1.63810100  | 3.25299000  | 3.64101200  |
| H | -1 | -2.90513800 | 6.57670100  | -0.02527700 |
| H | 0  | 1.06821600  | -4.52846200 | 1.49318300  |
| H | 0  | -3.54573100 | -5.76897100 | -0.67140000 |
| H | 0  | 8.10298900  | -1.42138700 | -1.63413200 |
| H | 0  | 7.27375200  | -1.96327000 | -0.17716200 |
| H | 0  | 7.27964400  | -0.24025800 | -0.59754100 |

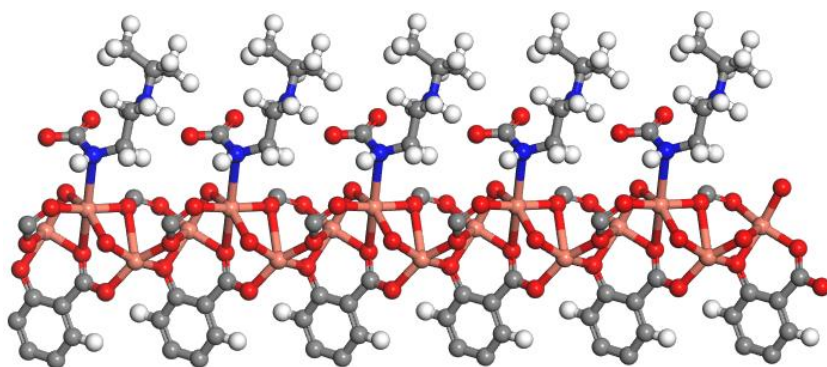

Cu-(D) Intermediate from VASP

1.00000000000000

|                      |                     |                     |
|----------------------|---------------------|---------------------|
| 21.4713919393119852  | 0.4455597270293223  | -0.0235925389605730 |
| -11.0154725746901434 | 18.4919036641038055 | 0.0066683608072075  |
| -0.0153077245343793  | -0.0064375764091587 | 6.2331172555577288  |

| Cu | O  | C  | H  | N |
|----|----|----|----|---|
| 6  | 20 | 48 | 32 | 2 |

Direct

|                    |                    |                    |
|--------------------|--------------------|--------------------|
| 0.3097928461897368 | 0.7423647559020665 | 0.8031412787721877 |
| 0.2501888914996826 | 0.6283319841824948 | 0.1401803754227160 |
| 0.3725826724270931 | 0.6836273786301277 | 0.4654368016827206 |
| 0.7007047198411058 | 0.3502610796885222 | 0.2711552814683600 |
| 0.5853562880162571 | 0.2902755268706017 | 0.9375653796288717 |
| 0.6396020739668131 | 0.4053326589833404 | 0.6040457944919098 |
| 0.4006983932148955 | 0.7695895937489325 | 0.6463168873373988 |
| 0.3697734615168997 | 0.7319274344862663 | 0.2092462728952214 |
| 0.3596400933897357 | 0.8146499902612661 | 0.0239570727215224 |
| 0.2224675326839787 | 0.6924564820031947 | 0.9795834209901386 |
| 0.2596151902657624 | 0.6972279020988381 | 0.5414171515347732 |
| 0.1769634597053553 | 0.6047712230763693 | 0.3569354309141772 |
| 0.3009547153977437 | 0.5904147801976052 | 0.3117087405529873 |
| 0.2952813990703547 | 0.6239493798058433 | 0.8775066948179884 |
| 0.3843447127476054 | 0.6270603630217906 | 0.6886072746117904 |
| 0.5414527580530617 | 0.7532824480786147 | 0.7297929665144807 |
| 0.5739848164785712 | 0.8300580066070040 | 0.4479208856177905 |
| 0.7270559965308721 | 0.4418022320791195 | 0.4298240258202313 |
| 0.6896142060134522 | 0.4086814072599338 | 0.8656063557880671 |
| 0.7733177902876278 | 0.4001547043250113 | 0.0527814544519103 |
| 0.6501906471310548 | 0.2627859251656304 | 0.0962304683663717 |
| 0.6543621836424194 | 0.3009168845668384 | 0.5319758293862762 |
| 0.5629706612842824 | 0.2180213690543482 | 0.7182545110720326 |
| 0.5480869082958222 | 0.3411581879378360 | 0.7622331329148082 |
| 0.5817179485633446 | 0.3367093632317264 | 0.1984612191786397 |
| 0.5889910755326255 | 0.4280626190867451 | 0.3849096039224662 |
| 0.4359042598602656 | 0.8358931579279769 | 0.5633902017149808 |
| 0.4247733883331648 | 0.8521630007671632 | 0.3503301759056257 |
| 0.4600314434647714 | 0.9233767716452164 | 0.2796444898591233 |
| 0.5094288852994211 | 0.9786183999683189 | 0.4101255595826814 |
| 0.5225536340546100 | 0.9612004225450193 | 0.6166322564314015 |
| 0.4869687392612576 | 0.8918351770248520 | 0.6927674632862875 |
| 0.3815840270101418 | 0.7964181337834688 | 0.1901070664067959 |
| 0.1560201723446610 | 0.6610765093025250 | 0.8948529857836505 |
| 0.1396260494943036 | 0.6321585249922066 | 0.6836441902324921 |
| 0.0679759405386520 | 0.5945621755784458 | 0.6148518540753898 |
| 0.0121814602394466 | 0.5882653894117666 | 0.7443691037662319 |
| 0.0296942500233399 | 0.6210248271003636 | 0.9474174365747245 |
| 0.0996726117197966 | 0.6566688282703623 | 0.0221924708874539 |
| 0.1955195195021915 | 0.6448383302002512 | 0.5229493152443396 |
| 0.3289607254815721 | 0.5524322817573761 | 0.2263043151526389 |
| 0.3558377812683844 | 0.5625869388297957 | 0.0133684874010171 |
| 0.3919139656464168 | 0.5268553092974031 | 0.9439786324670507 |
| 0.3985798167819183 | 0.4777336535817156 | 0.0747369673553990 |
| 0.3671650982517392 | 0.4642709005724512 | 0.2794032011778853 |
| 0.3329449351807270 | 0.5002059651533131 | 0.3544385418359184 |

|                    |                    |                    |
|--------------------|--------------------|--------------------|
| 0.3449684584105981 | 0.6077687913034495 | 0.8548737906715189 |
| 0.5427132411737716 | 0.7681988688403578 | 0.5317623335803958 |
| 0.5228492380398322 | 0.7066174351215651 | 0.1751614435954139 |
| 0.6033030871747656 | 0.7525313716645812 | 0.1260025355284355 |
| 0.7933837660782004 | 0.4775392484913539 | 0.5156273205351027 |
| 0.8101872546430045 | 0.4653555099578810 | 0.7271166795142960 |
| 0.8818130170775476 | 0.5002568475772691 | 0.7970382552411124 |
| 0.9370073322161971 | 0.5501837001173655 | 0.6681705124006143 |
| 0.9188886073080340 | 0.5647941542062611 | 0.4645913137966673 |
| 0.8490258101113355 | 0.5296842160724751 | 0.3887844104826925 |
| 0.7545600507345398 | 0.4214644666898906 | 0.8863417609281115 |
| 0.6196604759065067 | 0.1966397199708183 | 0.1817893124972159 |
| 0.5907540252734762 | 0.1805324743856005 | 0.3926238372525148 |
| 0.5536676877143378 | 0.1092063452917031 | 0.4619711978426082 |
| 0.5478668800609086 | 0.0533986135809457 | 0.3335889155771810 |
| 0.5809581829482795 | 0.0707810179533865 | 0.1313035730160266 |
| 0.6160508255808423 | 0.1404413280202235 | 0.0557462954664345 |
| 0.6026362969759660 | 0.2363630088937114 | 0.5520754426267231 |
| 0.5113501147723198 | 0.3709000841927974 | 0.8473023151640078 |
| 0.5232800519319838 | 0.3995099355302116 | 0.0588343814139876 |
| 0.4873682115490823 | 0.4354524750570690 | 0.1283428700191180 |
| 0.4366140865034396 | 0.4403045425367367 | 0.9993052220978100 |
| 0.4219671535333163 | 0.4076207962059684 | 0.7960914920749573 |
| 0.458156868772659  | 0.3737183211863808 | 0.7204646147554641 |
| 0.5680019929168481 | 0.3882037498046600 | 0.2186393374638698 |
| 0.6900939317211652 | 0.8813777809311674 | 0.0063009430759706 |
| 0.6846829069999956 | 0.9453778247366031 | 0.9227637462770986 |
| 0.7395818713519802 | 0.8994426412617500 | 0.2007106531806997 |
| 0.4476565472664831 | 0.9342938911635130 | 0.1189101479244030 |
| 0.5629105983631320 | 0.0035889829519107 | 0.7168086462224394 |
| 0.4985061749532846 | 0.8783687551296993 | 0.8509178548471041 |
| 0.0571401339728013 | 0.5703343161749288 | 0.4556982560329459 |
| 0.9869842518065468 | 0.6189412315014806 | 0.0467166082372543 |
| 0.1128765670356415 | 0.6822297206103016 | 0.1793814053092646 |
| 0.4152288405705988 | 0.5390670167713125 | 0.7839094965279969 |
| 0.3693099145207270 | 0.4238594381325100 | 0.3798576340313105 |
| 0.3084068066173629 | 0.4891557378158495 | 0.5127127072268962 |
| 0.5049597262177485 | 0.6508307423387265 | 0.1331685168033445 |
| 0.6187414267042257 | 0.7298146679849751 | 0.9930292951604116 |
| 0.8931525470568928 | 0.4872476226816644 | 0.9563863077939629 |
| 0.9611093207036774 | 0.6054701874401189 | 0.3654977405993165 |
| 0.8354688218321584 | 0.5414967453551398 | 0.2309622511411362 |
| 0.5292523054481464 | 0.0985014884222295 | 0.6205569995384010 |
| 0.5792600567612141 | 0.0281150518151989 | 0.0327264575938386 |
| 0.6415312168454079 | 0.1533805922719438 | 0.8987098852692483 |
| 0.5002475484992814 | 0.4594830118442914 | 0.2878217858749039 |

|                    |                    |                    |
|--------------------|--------------------|--------------------|
| 0.3803399565200039 | 0.4084225750675898 | 0.6973179498279336 |
| 0.4462155758340316 | 0.3482409889931191 | 0.5631452926650340 |
| 0.4932505633044713 | 0.7235952907321277 | 0.0668834494201036 |
| 0.5833289566897051 | 0.8109708483263631 | 0.9157406215963846 |
| 0.5951895185292670 | 0.8394783627899542 | 0.1923209482268149 |
| 0.6357979617287626 | 0.7578180909992298 | 0.2680884618436892 |
| 0.4898338147316679 | 0.6620579817236560 | 0.4817564719203631 |
| 0.7087061565538306 | 0.8601667585614550 | 0.8748938617532644 |
| 0.6651205454789348 | 0.9669763234459481 | 0.0494724492967507 |
| 0.6482103634623826 | 0.9298259251853338 | 0.7841070299079860 |
| 0.7375842584237517 | 0.9880377181127500 | 0.8720847921869677 |
| 0.7924146372846508 | 0.9449579380378026 | 0.1632825961530813 |
| 0.7472857350441302 | 0.8545567318342933 | 0.2479752802277133 |
| 0.7173873636622119 | 0.9137093159385827 | 0.3393996533520891 |
| 0.5032995909744784 | 0.7076494689544788 | 0.3988325120070613 |
| 0.6158027076139163 | 0.8243625912492760 | 0.0587032733876001 |

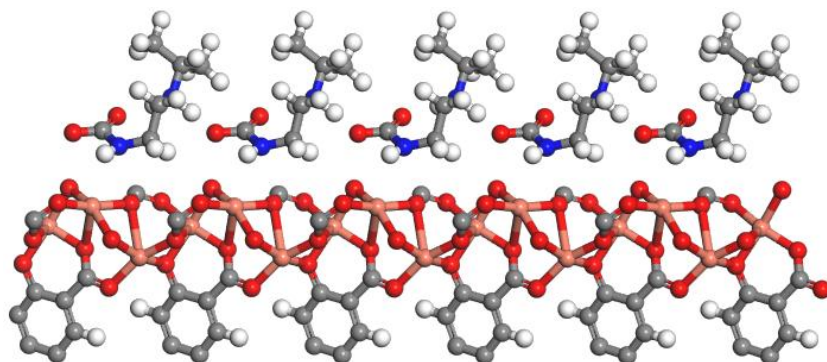

Cu-(E) TS<sub>2</sub>

1.0000000000000000

21.3662961337431732 0.0000000000000000 0.0000000000000000

-10.5657175468660292 18.5868737795892827 0.0000000000000000

-0.0173685281042812 0.0152132004050986 6.2120448109346693

Cu O C H N

6 20 48 32 2

Direct

|                    |                    |                    |
|--------------------|--------------------|--------------------|
| 0.3115462404637233 | 0.7446525157934428 | 0.7980604568755233 |
| 0.2480364706488976 | 0.6294362767031298 | 0.1330436151455374 |
| 0.3672760899434909 | 0.6805585797176130 | 0.4624953620317425 |
| 0.7016512890191650 | 0.3532797693045012 | 0.2746269920549940 |
| 0.5855540376889647 | 0.2894150996814054 | 0.9413236675661488 |
| 0.6368796085211725 | 0.4053506495016267 | 0.6068744060562277 |
| 0.4023478645726854 | 0.7674269984581659 | 0.6422300852574252 |
| 0.3686793572444244 | 0.7307980584150816 | 0.2045334596972125 |
| 0.3638078759386485 | 0.8169826302670122 | 0.0178643771269814 |
| 0.2233016744200826 | 0.6969255577870457 | 0.9744227671331133 |
| 0.2602429344896368 | 0.7000296240335464 | 0.5361134063347139 |
| 0.1751842630608640 | 0.6084881324351560 | 0.3515757298864465 |
| 0.2960754447354458 | 0.5882739891023180 | 0.3066268340479185 |

|                    |                    |                    |
|--------------------|--------------------|--------------------|
| 0.2924263288542132 | 0.6230213704124566 | 0.8697890766882531 |
| 0.3815804912119651 | 0.6243156078611329 | 0.6820774099207698 |
| 0.5415530970517649 | 0.7497892396315503 | 0.5859971609785634 |
| 0.5740369541822445 | 0.8249515694687634 | 0.2957704585938587 |
| 0.7249777726352219 | 0.4450439831408130 | 0.4313351085921530 |
| 0.6879896233027596 | 0.4108272078933499 | 0.8690915901998485 |
| 0.7740930234900603 | 0.4054137878794952 | 0.0555650071637299 |
| 0.6536145445963247 | 0.2652768821833811 | 0.0991265348046902 |
| 0.6560964944172957 | 0.3025458900337434 | 0.5363969558373424 |
| 0.5652477186023211 | 0.2170589544188543 | 0.7225136279202304 |
| 0.5453212734410310 | 0.3379102423898256 | 0.7645851592254809 |
| 0.5798478544062849 | 0.3350091390532065 | 0.2026316054875839 |
| 0.5843170868397836 | 0.4259767777320367 | 0.3872879502044006 |
| 0.4400042599511783 | 0.8341228523735549 | 0.5584365972853410 |
| 0.4290681401326664 | 0.8518263620661479 | 0.3459062600623419 |
| 0.4658636561618947 | 0.9237620759807874 | 0.2769861210397807 |
| 0.5161937948001007 | 0.9783400262453087 | 0.4088091858823210 |
| 0.5293464547822321 | 0.9593835093471058 | 0.6139833037545375 |
| 0.4926097617423950 | 0.8891261888971298 | 0.6882724131593371 |
| 0.3840782117065872 | 0.7968253632803594 | 0.1849209967749478 |
| 0.1565880631206939 | 0.6673913044240464 | 0.8898071255126356 |
| 0.1393083085345805 | 0.6382000464951828 | 0.6784842812237326 |
| 0.0671884795850725 | 0.6019042299562898 | 0.6104011752255878 |
| 0.0118562287211239 | 0.5971489134651286 | 0.7409536044859469 |
| 0.0303787408487702 | 0.6305437678217142 | 0.9436790685656765 |
| 0.1008414978839666 | 0.6650418748155590 | 0.0175649496463372 |
| 0.1949256316960724 | 0.6488881387452962 | 0.5175523868316368 |
| 0.3231623798982689 | 0.5489703729127897 | 0.2216532629919526 |
| 0.3506333741662014 | 0.5589486658143609 | 0.0085235395244217 |
| 0.3855927907496333 | 0.5216195327505919 | 0.9399331802867824 |
| 0.3908999472653535 | 0.4715127945193634 | 0.0722786732303289 |
| 0.3587822181287398 | 0.4582351986576872 | 0.2769962499407615 |
| 0.3253163327100568 | 0.4954609116622287 | 0.3508390440605972 |
| 0.3415161704495841 | 0.6053984402422254 | 0.8484244769765337 |
| 0.5454963921240098 | 0.7630011847682324 | 0.3839836588757305 |
| 0.5311798644385121 | 0.7017862431545139 | 0.0299639951322396 |
| 0.6112741726759686 | 0.7507539247807631 | 0.9733651005588441 |
| 0.7915468366981004 | 0.4828630519114434 | 0.5166056072961046 |
| 0.8092116739268075 | 0.4712896473744667 | 0.7285593228980483 |
| 0.8812800704345806 | 0.5078729517504026 | 0.7974424910448641 |
| 0.9360429992988282 | 0.5588057377423457 | 0.6669248559080606 |
| 0.9169482060962484 | 0.5731363413892760 | 0.4633673168689299 |
| 0.8466026386122528 | 0.5364604469683419 | 0.3887294592488912 |
| 0.7539699643920235 | 0.4258498290561932 | 0.8889408500685545 |
| 0.6246786038859884 | 0.1986464582425436 | 0.1848004519499535 |
| 0.5953659343233598 | 0.1813900713759353 | 0.3960751746262998 |

|                    |                    |                    |
|--------------------|--------------------|--------------------|
| 0.5592855596507067 | 0.1093268518975128 | 0.4646604890228805 |
| 0.5548777584701670 | 0.0540731111531909 | 0.3347863054198811 |
| 0.5887575990170933 | 0.0727426154099109 | 0.1325423912393132 |
| 0.6229972402300871 | 0.1431340849465515 | 0.0579863911269101 |
| 0.6054254507788305 | 0.2368156991597452 | 0.5561001589090140 |
| 0.5068206661638385 | 0.3662088091750054 | 0.8492453083546971 |
| 0.5182006689617000 | 0.3952101687811744 | 0.0607426984688334 |
| 0.4808269242002695 | 0.4302019227452554 | 0.1291582089344366 |
| 0.4292750844208294 | 0.4337567872435597 | 0.9988846055033826 |
| 0.4149845676772824 | 0.4003870213847738 | 0.7961230431703631 |
| 0.4524930340407415 | 0.3672646947144240 | 0.7217512553313127 |
| 0.5641665223242970 | 0.3855802386915543 | 0.2214436217783994 |
| 0.6944985043981005 | 0.8791162701915718 | 0.8408474291820451 |
| 0.6871237225272244 | 0.9383188129077612 | 0.7247666112211556 |
| 0.7443440782282063 | 0.9068610998793185 | 0.0361057545862490 |
| 0.4537330628078921 | 0.9358656848212997 | 0.1166980270577424 |
| 0.5702636574173129 | 0.0012514554796012 | 0.7153736817588175 |
| 0.5034931731575331 | 0.8746556607959207 | 0.8468019996284423 |
| 0.0555863209395711 | 0.5771374315434611 | 0.4514772628053373 |
| 0.9880990180502125 | 0.6296568129843787 | 0.0438848583927592 |
| 0.1148138216625387 | 0.6909803844952505 | 0.1746575214779594 |
| 0.4093829382889114 | 0.5336782700761747 | 0.7795398178840680 |
| 0.3599171470241607 | 0.4171276972941247 | 0.3787517129295453 |
| 0.3002916276501095 | 0.4846544115583923 | 0.5092723055097801 |
| 0.5151840998283186 | 0.6462677993485698 | 0.9859912166094467 |
| 0.6270972922572684 | 0.7287296473808860 | 0.8384734702079096 |
| 0.8933471179007594 | 0.4950805970016426 | 0.9569174479110041 |
| 0.9587553052490255 | 0.6146132553602425 | 0.3629360947521516 |
| 0.8322996261010637 | 0.5479529294124430 | 0.2307425229105929 |
| 0.5342792981215545 | 0.0975892341983259 | 0.6233544974155362 |
| 0.5881860651629529 | 0.0305200416609247 | 0.0330384110744852 |
| 0.6489946640124016 | 0.1571254043968234 | 0.9008342282716396 |
| 0.4934249417398365 | 0.4548029617382373 | 0.2883616907890027 |
| 0.3727939144740450 | 0.4002018450897214 | 0.6963795420924762 |
| 0.4409169811966109 | 0.3413131626938653 | 0.5646923190760039 |
| 0.4988023804822708 | 0.7172026772997123 | 0.9268648796119680 |
| 0.5859376760223151 | 0.8066089949842787 | 0.7642439175289014 |
| 0.6003147650730987 | 0.8367610585953142 | 0.0388980204432921 |
| 0.6456472540652201 | 0.7578571528300621 | 0.1130463624179055 |
| 0.5005433213362133 | 0.6557223796939919 | 0.3398265098870341 |
| 0.7144604170761529 | 0.8538644829062444 | 0.7254307120184653 |
| 0.6683309675573816 | 0.9652770721239383 | 0.8368658762908504 |
| 0.6489493106655598 | 0.9160637824302923 | 0.5898401445131434 |
| 0.7396255841842070 | 0.9790243737304025 | 0.6612287841969677 |
| 0.7978566735278053 | 0.9496248668753153 | 0.9862819243522155 |
| 0.7508936210053720 | 0.8644002313768857 | 0.1147600672267049 |



|                    |                    |                    |
|--------------------|--------------------|--------------------|
| 0.7229116749654976 | 0.9291955169939354 | 0.1562143050831720 |
| 0.5139275308533533 | 0.7014254244392673 | 0.2560317440902202 |
| 0.6208046875842520 | 0.8218395151388441 | 0.9042155818808209 |

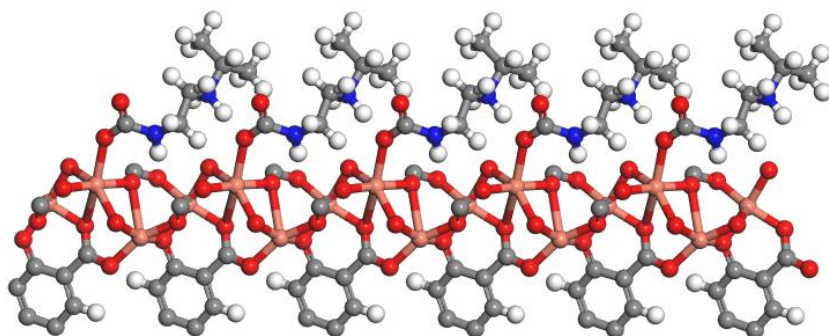

Cu–(F) Product

1.000000000000000

|                      |                     |                    |
|----------------------|---------------------|--------------------|
| 20.9456781943469466  | 0.1064508597184458  | 0.0944247286118163 |
| -11.1720600706986382 | 18.6538081929009572 | 0.0223327153084166 |
| -0.0552169460898520  | -0.0035080098020596 | 6.1953951107104102 |

|    |    |    |    |   |
|----|----|----|----|---|
| Cu | O  | C  | H  | N |
| 6  | 20 | 48 | 32 | 2 |

Direct

|                    |                    |                    |
|--------------------|--------------------|--------------------|
| 0.3238481165807343 | 0.7507424119491901 | 0.7896662699038259 |
| 0.2562987874986220 | 0.6372304521815479 | 0.1263833134979748 |
| 0.3894642328239257 | 0.6885842914360012 | 0.4450427274899695 |
| 0.6994123264496892 | 0.3564878339872735 | 0.2735420470912189 |
| 0.5791853652079766 | 0.2874389808637332 | 0.9396059360691069 |
| 0.6295778046744047 | 0.4026191681198625 | 0.6059612220104995 |
| 0.4183925708511467 | 0.7746038696261266 | 0.6391083528854722 |
| 0.3841340276837073 | 0.7382288016259650 | 0.1931575185874550 |
| 0.3778372473257789 | 0.8230924420542607 | 0.0117794343522775 |
| 0.2337080790071155 | 0.7053825224185601 | 0.9670577831047851 |
| 0.2710614858760181 | 0.7087385885082398 | 0.5255172632918885 |
| 0.1817633034603787 | 0.6171498033361331 | 0.3440000218905865 |
| 0.3042769858626642 | 0.5963203878360090 | 0.2983921160970482 |
| 0.3004634861623074 | 0.6303242535177418 | 0.8601377349040717 |
| 0.3912843615793662 | 0.6293137699017350 | 0.6766422359430209 |
| 0.5095358447694665 | 0.7292767415933668 | 0.3821859810572761 |
| 0.6087079877354853 | 0.7235497048198454 | 0.2678425850566981 |
| 0.7202542825249552 | 0.4459524785272677 | 0.4293534499985441 |
| 0.6830034738730717 | 0.4107880748074138 | 0.8684357684792445 |
| 0.7737458456937247 | 0.4106046806504793 | 0.0548217921020253 |
| 0.6526319088986341 | 0.2688956371169411 | 0.0979141840989470 |
| 0.6535981220181455 | 0.3045522426640233 | 0.5361696179718081 |
| 0.5615724591548314 | 0.2163412086365284 | 0.7213534074224981 |
| 0.5353491414609337 | 0.3318622717764654 | 0.7613470054660283 |
| 0.5717669614297520 | 0.3310826615283062 | 0.2006916574174866 |
| 0.5745666649044239 | 0.4197944152946818 | 0.3851711468159991 |

|                    |                    |                    |
|--------------------|--------------------|--------------------|
| 0.4549117461149379 | 0.8410059106531449 | 0.5569636905574527 |
| 0.4437654416774635 | 0.8578911089904153 | 0.3426799020692215 |
| 0.4785641956937141 | 0.9296147046016756 | 0.2763108617061505 |
| 0.5275711597182706 | 0.9854832994448302 | 0.4105873900971133 |
| 0.5415120016657013 | 0.9679520182132251 | 0.6171531345862391 |
| 0.5066634448644010 | 0.8977215521749073 | 0.6891588066081624 |
| 0.3986830990283039 | 0.8030454175214601 | 0.1780368624092645 |
| 0.1650130027204000 | 0.6765606598180085 | 0.8823578815733484 |
| 0.1466175655116615 | 0.6474219997976860 | 0.6709765218654553 |
| 0.0721839522573973 | 0.6112486865251086 | 0.6035915571803159 |
| 0.0158587660682841 | 0.6065848876797730 | 0.7351383483944574 |
| 0.0357150616740114 | 0.6403246223125052 | 0.9374190843374919 |
| 0.1084789718413575 | 0.6748213516170054 | 0.0105031124496691 |
| 0.2034009030940140 | 0.6578359460749112 | 0.5091588664122639 |
| 0.3250987665241496 | 0.5527978975069203 | 0.2115207392057172 |
| 0.3523369548871429 | 0.5609155476526695 | 0.9969538797643978 |
| 0.3830465016723466 | 0.5202289524697434 | 0.9269481823259156 |
| 0.3832823868176760 | 0.4681660478625176 | 0.0592811499905537 |
| 0.3503649794635137 | 0.4564044241856919 | 0.2642568020135698 |
| 0.3214314910224800 | 0.4971168542576052 | 0.3396404853734794 |
| 0.3478101446805510 | 0.6099081254804233 | 0.8388887272706356 |
| 0.5490994675648224 | 0.7219867430004570 | 0.2316949679038700 |
| 0.5562041529457034 | 0.6965097438128041 | 0.8502389004283302 |
| 0.6291748245544042 | 0.7591621933520969 | 0.7702145521304828 |
| 0.7886814511745683 | 0.4863012278492320 | 0.5144005854142648 |
| 0.8077593648362154 | 0.4760045061847364 | 0.7266695421203266 |
| 0.8820832417132252 | 0.5150360295188960 | 0.7948204280903255 |
| 0.9374942092259602 | 0.5669307729073125 | 0.6630129054657843 |
| 0.9167416789880320 | 0.5801406374093503 | 0.4596745508318705 |
| 0.8441804779698714 | 0.5411709882817632 | 0.3858752062955659 |
| 0.7516818579741340 | 0.4291241451294994 | 0.8877639942403661 |
| 0.6267779125756405 | 0.2034725650675071 | 0.1843823696905815 |
| 0.5967044550113556 | 0.1845924165561783 | 0.3961124415675457 |
| 0.5636670694723662 | 0.1132901615699140 | 0.4658851349790396 |
| 0.5635029657735728 | 0.0606878109447706 | 0.3368739467051967 |
| 0.5985144533355253 | 0.0813501421735836 | 0.1345752833139287 |
| 0.6295074914477752 | 0.1508537885408145 | 0.0585668676922779 |
| 0.6034983517280210 | 0.2381941948189166 | 0.5557635258129494 |
| 0.4959017702189570 | 0.3594440293428391 | 0.8448676007034450 |
| 0.5080333723828332 | 0.3888101038488614 | 0.0558266015719653 |
| 0.4711311294627052 | 0.4243082758733081 | 0.1213255706309226 |
| 0.4192066499535443 | 0.4281130654937542 | 0.9884840311692287 |
| 0.4034226247664776 | 0.3938651942247660 | 0.7870080037053171 |
| 0.4404551089520368 | 0.3600400109613062 | 0.7156778544196669 |
| 0.5548068173836214 | 0.3800466690913993 | 0.2184339223591252 |
| 0.6801996474498821 | 0.8701896167470053 | 0.5379986367966225 |

|                    |                    |                    |
|--------------------|--------------------|--------------------|
| 0.6550136592421225 | 0.9037068994017048 | 0.3653088322571421 |
| 0.7335438828567362 | 0.9252572101024867 | 0.7001923065335589 |
| 0.4652547187105966 | 0.9406625400983444 | 0.1157502583623184 |
| 0.5810293830760216 | 0.0107682482470182 | 0.7220035762073636 |
| 0.5171477675452962 | 0.8848872666022771 | 0.8511476768017374 |
| 0.0595002073681670 | 0.5862643504513727 | 0.4448646632018622 |
| 0.9927080864409703 | 0.6395123368649962 | 0.0382045049137005 |
| 0.1235696878678425 | 0.7009029208380468 | 0.1674475970890015 |
| 0.4078517363585092 | 0.5312670920960656 | 0.7666482816782860 |
| 0.3478097653946648 | 0.4140999546635840 | 0.3659605620168804 |
| 0.2961511651062452 | 0.4877456877853774 | 0.4988586617647783 |
| 0.5669756912756441 | 0.6544959179269512 | 0.9063962964877987 |
| 0.6540725778951568 | 0.7402848930789432 | 0.6519388678173925 |
| 0.8954512245261341 | 0.5032287495727914 | 0.9543099687487313 |
| 0.9589842629911871 | 0.6223701420911567 | 0.3585055892879438 |
| 0.8284725430550850 | 0.5517103914206629 | 0.2281395410601021 |
| 0.5375283831090840 | 0.1000083273779353 | 0.6244882680580659 |
| 0.6015166562537644 | 0.0414461148894816 | 0.0360454366212366 |
| 0.6565115349777813 | 0.1664506977113689 | 0.9014989845585504 |
| 0.4849234309786610 | 0.4497481841208142 | 0.2793787565903401 |
| 0.3608490239366660 | 0.3939078295186533 | 0.6850150829469612 |
| 0.4281238338800293 | 0.3338863556264400 | 0.5588938077012315 |
| 0.5162952897295909 | 0.6755655096920279 | 0.7158369502314414 |
| 0.5689607914142343 | 0.7774719273486781 | 0.5360855364972608 |
| 0.5921331024228280 | 0.8313552227587238 | 0.7577948332138220 |
| 0.6674004021211104 | 0.7862180786442181 | 0.9047410194126044 |
| 0.4735916736317023 | 0.7119565550738258 | 0.9994323680996899 |
| 0.7058629573034310 | 0.8431348393426532 | 0.4578386888054737 |
| 0.6294831400993530 | 0.9320532839873223 | 0.4372215352570947 |
| 0.6147932858250229 | 0.8632368000746595 | 0.2542081077119676 |
| 0.7034524631538588 | 0.9425417562478273 | 0.2711618177204258 |
| 0.7818363884089905 | 0.9679611515097335 | 0.6152134836117753 |
| 0.7538564925663991 | 0.9019108861760472 | 0.8200985775904002 |
| 0.7065157534632789 | 0.9502341602840261 | 0.7860254957732167 |
| 0.5237345989881561 | 0.7164797945791079 | 0.0221980293043771 |
| 0.6141225856594374 | 0.8107150444757352 | 0.6523020368298162 |

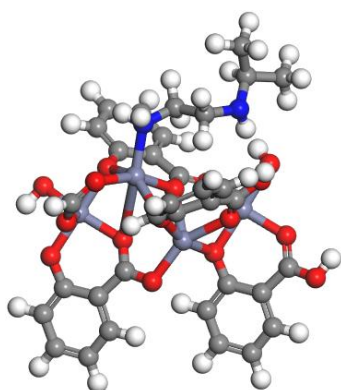

## Zn-(A) i-2-MOF

-1 1

|    |             |             |             |
|----|-------------|-------------|-------------|
| H  | 2.06277200  | 7.37566400  | -0.55674000 |
| Zn | -1.77517300 | 1.95789200  | -1.39564100 |
| O  | -3.73888900 | 1.35481500  | -1.68712100 |
| O  | -1.12800300 | 0.36101500  | -2.52990000 |
| O  | 0.14734000  | 2.47715300  | -1.01193100 |
| O  | -2.38891200 | 3.85450000  | -1.29717500 |
| O  | -2.41809900 | 5.76185200  | -0.17168100 |
| O  | -1.72531200 | 1.70952100  | 0.78220800  |
| O  | -3.85134100 | 1.33495900  | 1.38060100  |
| H  | -3.61417800 | 0.66202200  | -2.34610900 |
| C  | 0.58368400  | 3.74937300  | -0.92965300 |
| C  | -0.27119500 | 4.86192100  | -0.67822200 |
| C  | 0.28797700  | 6.14209200  | -0.51684600 |
| C  | 1.65428000  | 6.37782800  | -0.66843000 |
| C  | 2.47768000  | 5.28346000  | -0.98713000 |
| C  | 1.96252500  | 4.00241000  | -1.11341000 |
| C  | -1.75437600 | 4.79947900  | -0.69070600 |
| C  | -2.18005800 | 0.50435600  | 2.82643600  |
| C  | -3.14145200 | 0.37756200  | 3.84428500  |
| C  | -2.60448500 | 1.21620700  | 1.58897900  |
| C  | -3.79184000 | -2.00363500 | 0.67660700  |
| H  | -3.60034900 | -0.30193800 | 5.84546100  |
| C  | -5.61246400 | -1.89999100 | -1.00504700 |
| C  | -6.46290100 | -2.96023000 | -0.31423600 |
| C  | -6.49157400 | -0.85735900 | -1.68665200 |
| H  | -0.39263500 | 6.95861300  | -0.27307400 |
| H  | -4.14734000 | 0.74142800  | 3.63244900  |
| H  | -4.29800100 | -0.41489500 | -0.51824500 |
| H  | -3.16567200 | -1.32141600 | 1.26176000  |
| H  | -4.31181300 | -2.63197100 | 1.41387700  |
| H  | -5.02221700 | -2.40753900 | -1.79288900 |
| H  | -7.05475700 | -2.50506700 | 0.48771500  |
| H  | -5.85663800 | -3.76014600 | 0.12310200  |
| H  | -7.14896600 | -3.42256100 | -1.03073300 |
| H  | -7.19093600 | -0.42294000 | -0.96313000 |
| H  | -7.06963400 | -1.30319200 | -2.50182500 |
| H  | -5.87857000 | -0.04339000 | -2.08833500 |
| N  | -4.75486800 | -1.20410900 | -0.04995300 |
| H  | 6.76633100  | 3.17873200  | 0.50630700  |
| H  | 3.54258000  | 5.45298600  | -1.15725000 |
| Zn | 2.92590000  | -2.23926600 | -0.33085300 |
| Zn | 0.33235400  | 1.17200000  | 0.56155200  |
| Zn | -0.07804400 | -1.99038600 | 0.88867600  |
| O  | 0.93689900  | -2.80354800 | -0.63776700 |

|   |             |             |             |
|---|-------------|-------------|-------------|
| O | -0.50741400 | -0.47260800 | -0.56479200 |
| O | 3.57307000  | -3.83614300 | -1.46511200 |
| O | 4.84841300  | -1.72000500 | 0.05285700  |
| O | 2.31704400  | -0.33249800 | -0.21528800 |
| O | 2.28290100  | 1.56476000  | 0.89309000  |
| O | -0.02378000 | -0.18868700 | 2.00990500  |
| O | 2.97576100  | -2.48763700 | 1.84699600  |
| O | 0.84718800  | -2.98217300 | 2.45660900  |
| C | 0.47125500  | -2.90741700 | -1.87889800 |
| C | -0.26159000 | -1.85909500 | -2.51485700 |
| C | -0.69885800 | -2.01947000 | -3.84196700 |
| C | -0.49316200 | -3.19949400 | -4.55688700 |
| C | 0.19952500  | -4.23779100 | -3.91059800 |
| C | 0.67341700  | -4.09760700 | -2.61588700 |
| C | -0.65487000 | -0.59507400 | -1.83935100 |
| C | 5.28475700  | -0.44778500 | 0.13513400  |
| C | 4.42987800  | 0.66476300  | 0.38656600  |
| C | 4.98905000  | 1.94493400  | 0.54794200  |
| C | 6.35535300  | 2.18067000  | 0.39635700  |
| C | 7.17875200  | 1.08630200  | 0.07765700  |
| C | 6.66359700  | -0.19474800 | -0.04862200 |
| C | 2.94669700  | 0.60232100  | 0.37408100  |
| C | -0.88502000 | -0.05917700 | 3.01127800  |
| H | 2.45741500  | -3.42317200 | 3.59652100  |
| C | -2.84563400 | -0.21378100 | 5.07293700  |
| C | -1.52767300 | -0.66110400 | 5.28270200  |
| C | -0.56715200 | -0.58236600 | 4.28576800  |
| C | 2.09651500  | -2.98088500 | 2.65375100  |
| C | -2.85648400 | -2.89827400 | -0.14062300 |
| H | -2.02098300 | -3.63146500 | 1.58819000  |
| H | -1.20635400 | -1.17203900 | -4.30429700 |
| H | 1.22709400  | -4.91007200 | -2.14218800 |
| H | 4.30843700  | 2.76145500  | 0.79171400  |
| H | 2.60737400  | 3.16298300  | -1.37301100 |
| H | -1.26067400 | -1.07862500 | 6.25530700  |
| H | 0.45096300  | -0.93363300 | 4.45427000  |
| H | -2.48487900 | -2.35830200 | -1.01427600 |
| H | -3.38709000 | -3.78580400 | -0.50418500 |
| H | -1.24561700 | -4.11080400 | 0.25499200  |
| N | -1.69260700 | -3.30161000 | 0.68183700  |
| H | -0.84929200 | -3.30699300 | -5.57565000 |
| H | 0.35355200  | -5.17961500 | -4.43988300 |
| H | 8.24365300  | 1.25582800  | -0.09246200 |
| H | 4.51052500  | -3.77518800 | -1.24852700 |
| H | 7.30837400  | -1.03410900 | -0.30824000 |
| H | -4.38795000 | 1.13493700  | 2.15730300  |

|   |             |            |             |
|---|-------------|------------|-------------|
| H | -3.36314400 | 5.61048300 | -0.33989900 |
|---|-------------|------------|-------------|

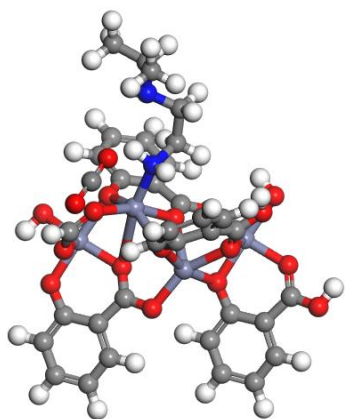

Zn-(B) Complex

-1 1

|    |             |             |             |
|----|-------------|-------------|-------------|
| H  | -7.96763600 | -1.52611200 | 1.03385800  |
| Zn | -1.85736600 | -2.63092400 | -1.52242200 |
| O  | -0.69885700 | -4.22067500 | -2.16718300 |
| O  | -3.00849900 | -1.14593500 | -0.74469600 |
| O  | -3.27189100 | -3.99630100 | -1.14795100 |
| O  | -4.72922000 | -4.92713600 | 0.24002500  |
| O  | -1.15570500 | -2.57870200 | 0.55242000  |
| O  | 0.08327200  | -4.42739800 | 0.78738600  |
| H  | -0.04508200 | -3.78705300 | -2.72683800 |
| C  | -4.28032300 | -1.30089900 | -0.32784900 |
| C  | -4.87005100 | -2.56416900 | -0.02359500 |
| C  | -6.17728900 | -2.60996100 | 0.49059900  |
| C  | -6.95543600 | -1.46430000 | 0.65100100  |
| C  | -6.38546800 | -0.23078100 | 0.28494500  |
| C  | -4.23672500 | -3.87788100 | -0.30668900 |
| C  | 1.28563100  | -3.51970500 | 3.06338500  |
| C  | -0.20816600 | -3.23768900 | 1.12628800  |
| H  | 2.58577500  | -3.79130700 | 4.77042800  |
| C  | 7.87579400  | -0.74482600 | -1.21567500 |
| H  | -6.57196300 | -3.59044000 | 0.75988000  |
| H  | 1.27265000  | -4.57450200 | 2.78652100  |
| H  | 4.54328200  | -2.97655000 | -1.98453200 |
| H  | 5.50118500  | -0.79533500 | -1.88573600 |
| H  | 7.06558800  | -2.70310700 | -1.52714400 |
| H  | 7.75055800  | -0.42758100 | -2.25690300 |
| H  | 8.90605000  | -1.08983700 | -1.09182900 |
| H  | -5.75044800 | 4.55537100  | 1.94410000  |
| H  | -6.98988400 | 0.67573400  | 0.35552600  |
| Zn | 0.36133800  | 3.44829100  | -0.61115600 |
| Zn | -1.52888500 | -0.48183100 | 0.52534600  |
| Zn | 1.47504900  | 0.54919000  | 0.22481800  |
| O  | 1.55530200  | 1.82551800  | -1.30842800 |
| O  | 0.03951400  | -0.44400900 | -0.98538400 |

|   |             |             |             |
|---|-------------|-------------|-------------|
| O | -0.84869000 | -1.31721200 | -2.82300900 |
| O | -0.78982100 | 4.93320600  | 0.16653800  |
| O | -1.05100200 | 2.08046400  | -0.21221700 |
| O | -2.51052200 | 1.15210400  | 1.15126800  |
| O | 0.13953800  | -0.32862800 | 1.66830100  |
| O | 1.06294000  | 3.50044400  | 1.46369100  |
| O | 2.41426700  | 1.69635200  | 1.68204800  |
| O | 4.08577600  | 1.50613400  | 4.23356400  |
| O | 4.86808500  | 0.07390500  | 2.56995100  |
| C | 1.54251200  | 1.49563000  | -2.60035500 |
| C | 0.76189200  | 0.41630000  | -3.11362400 |
| C | 0.78780600  | 0.13562400  | -4.49139300 |
| C | 1.59209000  | 0.84598000  | -5.38024000 |
| C | 2.37552500  | 1.89267100  | -4.85683000 |
| C | 2.34833400  | 2.21352900  | -3.51169400 |
| C | -0.04156900 | -0.50152700 | -2.27334600 |
| C | -2.06162600 | 4.77834200  | 0.58340000  |
| C | -2.65134800 | 3.51507200  | 0.88765500  |
| C | -3.95859000 | 3.46927700  | 1.40185100  |
| C | -4.73673800 | 4.61493800  | 1.56225300  |
| C | -4.16680300 | 5.84836500  | 1.19618300  |
| C | -5.08588400 | -0.14672100 | -0.18835100 |
| C | -2.01806800 | 2.20126400  | 0.60456300  |
| C | 0.62850600  | -1.23051800 | 2.50784800  |
| C | 0.55917500  | -2.63206200 | 2.25101800  |
| C | 2.03104800  | -3.08844000 | 4.16042200  |
| C | 2.01456600  | -1.71122500 | 4.45725200  |
| C | 1.32944100  | -0.80712300 | 3.66182600  |
| C | 2.01055400  | 2.84158100  | 2.03747400  |
| C | 4.45635800  | 0.79798900  | 3.38570300  |
| C | 3.12626900  | -1.65780200 | -1.03516700 |
| C | 4.48465400  | -2.33986800 | -1.08568600 |
| C | 6.89009500  | -1.84636800 | -0.85028300 |
| C | 7.11586100  | -2.31752700 | 0.58217700  |
| H | 0.14268000  | -0.66822800 | -4.84804200 |
| H | 2.97229800  | 3.01415400  | -3.11425200 |
| H | -4.35326400 | 2.48879900  | 1.67113300  |
| H | -4.65653800 | 0.81253200  | -0.47718500 |
| H | 2.54941300  | -1.35409700 | 5.33949700  |
| H | 1.32091200  | 0.25768800  | 3.89697600  |
| H | 2.31664700  | -2.39166300 | -1.05190600 |
| H | 2.99959900  | -1.01485600 | -1.91308300 |
| H | 3.89033200  | -0.33476500 | 0.27767600  |
| H | 4.58116500  | -3.00493100 | -0.21995300 |
| H | 2.93485600  | -1.42267600 | 0.98573400  |
| H | 7.72463900  | 0.12845700  | -0.57178300 |

|   |             |             |             |
|---|-------------|-------------|-------------|
| H | 8.13686600  | -2.69339200 | 0.69997000  |
| H | 6.43531200  | -3.12593300 | 0.86554500  |
| H | 6.96705600  | -1.48707300 | 1.28012900  |
| N | 2.99373800  | -0.81633700 | 0.16871000  |
| N | 5.52886900  | -1.32865400 | -1.01981600 |
| H | 1.60782800  | 0.60564100  | -6.43770800 |
| H | 3.03874900  | 2.44334900  | -5.52675800 |
| H | -4.77118600 | 6.75497300  | 1.26677900  |
| O | 1.30594600  | 4.76073000  | -1.86782200 |
| H | 0.97360400  | 5.58102200  | -1.48596200 |
| C | -2.86718400 | 5.93251700  | 0.72290200  |
| H | 2.49808300  | 3.29413200  | 2.91526100  |
| H | -2.43787300 | 6.89167900  | 0.43405300  |
| H | -4.25608600 | -5.70268400 | -0.10438200 |
| H | 0.90995800  | -4.72930200 | 1.18526000  |

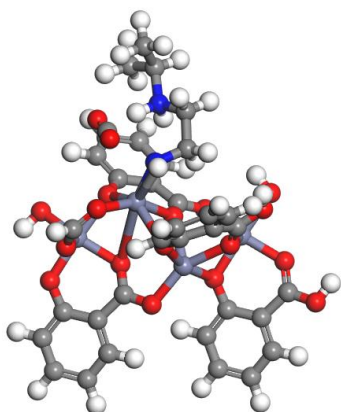

Zn-(C) TS<sub>1</sub>

-1 1

|    |             |             |             |
|----|-------------|-------------|-------------|
| H  | -8.10057800 | -0.73414700 | -0.50767000 |
| Zn | -1.71254700 | -2.52414000 | -1.54675000 |
| O  | -0.60471300 | -4.24414500 | -1.86210900 |
| O  | -2.85416200 | -0.90239300 | -1.09757300 |
| O  | -3.30606300 | -3.73274000 | -1.47369100 |
| O  | -5.12817000 | -4.45489900 | -0.43679600 |
| O  | -1.50104100 | -2.43394000 | 0.63204600  |
| O  | -0.54218400 | -4.37520200 | 1.19777100  |
| H  | 0.19848500  | -3.90359900 | -2.27163900 |
| C  | -4.19652800 | -0.91832400 | -0.98293800 |
| C  | -4.96499000 | -2.10505000 | -0.78967100 |
| C  | -6.35278000 | -2.00431300 | -0.59154500 |
| C  | -7.02680400 | -0.78513300 | -0.64697200 |
| C  | -6.26639500 | 0.37076000  | -0.90411000 |
| C  | -4.42024600 | -3.48407300 | -0.88258200 |
| C  | 0.19496700  | -3.47050400 | 3.66513300  |
| C  | -0.78115000 | -3.14830100 | 1.42756900  |
| H  | 1.03451500  | -3.77612600 | 5.63498700  |
| C  | 6.11246700  | -0.86944300 | -2.73439000 |



|    |             |             |             |
|----|-------------|-------------|-------------|
| H  | -6.89573000 | -2.92955800 | -0.39470600 |
| H  | 0.13867200  | -4.53203900 | 3.42142500  |
| H  | 3.95376600  | -3.69914700 | -0.73664600 |
| H  | 3.83947800  | -1.49753200 | -1.72247100 |
| H  | 5.68195500  | -2.92873600 | -2.28194900 |
| H  | 5.28827400  | -0.75575100 | -3.44426500 |
| H  | 7.01860500  | -1.09527900 | -3.30123500 |
| H  | -5.54511200 | 5.15463100  | 0.72639100  |
| H  | -6.77593000 | 1.33160500  | -1.00013000 |
| Zn | 0.84406800  | 3.36192800  | -0.31059600 |
| Zn | -1.64378600 | -0.31547600 | 0.46251000  |
| Zn | 1.54625700  | 0.31993700  | 0.86837500  |
| O  | 1.94122900  | 1.59749100  | -0.63801700 |
| O  | 0.18149600  | -0.50284200 | -0.61759900 |
| O  | -0.37821100 | -1.36862900 | -2.58515000 |
| O  | -0.29758600 | 4.98358500  | 0.13856000  |
| O  | -0.76572100 | 2.16119900  | -0.23241200 |
| O  | -2.57155400 | 1.43116900  | 0.79935600  |
| O  | -0.30782400 | -0.25628200 | 1.97817600  |
| O  | 1.05553500  | 3.45203800  | 1.86817900  |
| O  | 2.13987300  | 1.55052000  | 2.45065200  |
| O  | 4.70253800  | -0.21152600 | 3.06061500  |
| O  | 5.21301400  | 0.41967500  | 0.88201900  |
| C  | 2.17151600  | 1.21894200  | -1.89030900 |
| C  | 1.42333400  | 0.19213400  | -2.54115600 |
| C  | 1.73423800  | -0.15782300 | -3.86727300 |
| C  | 2.78777600  | 0.43018600  | -4.56428700 |
| C  | 3.53309500  | 1.42474500  | -3.90198400 |
| C  | 3.23246200  | 1.81317000  | -2.60899000 |
| C  | 0.36063200  | -0.60470000 | -1.88557000 |
| C  | -1.63991300 | 4.96774400  | 0.25321500  |
| C  | -2.40837300 | 3.78101800  | 0.44648300  |
| C  | -3.79616400 | 3.88175400  | 0.64460800  |
| C  | -4.47018900 | 5.10093500  | 0.58917900  |
| C  | -3.70981900 | 6.25673800  | 0.33202300  |
| C  | -4.89146700 | 0.31081800  | -1.06527700 |
| C  | -1.86367100 | 2.40190200  | 0.35355100  |
| C  | -0.08268300 | -1.16083100 | 2.91066900  |
| C  | -0.23326400 | -2.56101500 | 2.68277300  |
| C  | 0.71027400  | -3.05596800 | 4.89303600  |
| C  | 0.76615400  | -1.67008000 | 5.14061000  |
| C  | 0.37574500  | -0.74720200 | 4.18386200  |
| C  | 1.77546600  | 2.73776700  | 2.66372000  |
| C  | 4.80452900  | 0.01886400  | 1.91772000  |
| C  | 2.71813700  | -2.35968600 | 0.47522800  |
| C  | 4.04668300  | -2.79184400 | -0.13342800 |

|   |             |             |             |
|---|-------------|-------------|-------------|
| C | 5.85573100  | -1.99155200 | -1.74407400 |
| C | 6.99223700  | -2.16206900 | -0.75099300 |
| H | 1.10942100  | -0.91537100 | -4.34191900 |
| H | 3.82715300  | 2.57149000  | -2.09950200 |
| H | -4.33911500 | 2.95651000  | 0.84144600  |
| H | -4.31263300 | 1.21078100  | -1.27251700 |
| H | 1.11903400  | -1.32049400 | 6.11283600  |
| H | 0.42174500  | 0.32421000  | 4.38174700  |
| H | 2.38347200  | -3.20702000 | 1.08926700  |
| H | 1.98373400  | -2.28240200 | -0.34086200 |
| H | 4.65146300  | -0.85896100 | -0.44720300 |
| H | 4.79397300  | -2.95011400 | 0.64571600  |
| H | 2.75865000  | -1.35510000 | 2.21488200  |
| H | 6.26251500  | 0.08559200  | -2.22095800 |
| H | 7.91767100  | -2.32116800 | -1.30929200 |
| H | 6.85400000  | -3.02336100 | -0.09414400 |
| H | 7.11762700  | -1.26356100 | -0.13914200 |
| N | 2.81261000  | -1.12050200 | 1.22976000  |
| N | 4.55965000  | -1.71081800 | -1.02500900 |
| H | 3.01926600  | 0.13812800  | -5.58286400 |
| H | 4.38392700  | 1.87785700  | -4.41451700 |
| H | -4.21931500 | 7.21767400  | 0.23602300  |
| O | 2.17840400  | 4.51743900  | -1.34899700 |
| H | 1.85485600  | 5.38215600  | -1.07213100 |
| C | -2.33485100 | 6.19688600  | 0.17087600  |
| H | 2.08493900  | 3.19791400  | 3.61843700  |
| H | -1.75605700 | 7.09676000  | -0.03638400 |
| H | -4.67001700 | -5.28681600 | -0.64162600 |
| H | 0.11588900  | -4.74011700 | 1.80281400  |

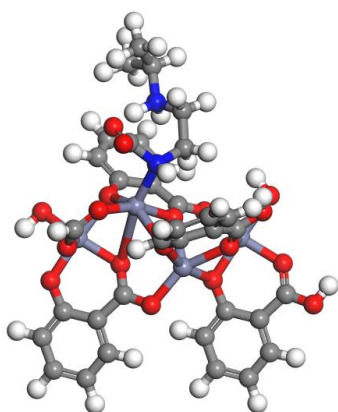

Zn-(D) Intermediate from Gaussian

|      |             |             |             |
|------|-------------|-------------|-------------|
| -1 1 |             |             |             |
| H    | -8.06462900 | -0.83248200 | -0.71498300 |
| Zn   | -1.62802500 | -2.53971000 | -1.57874800 |
| O    | -0.49033300 | -4.24480900 | -1.86763800 |
| O    | -2.80202100 | -0.93370700 | -1.15732400 |
| O    | -3.20772900 | -3.76823500 | -1.55405800 |

|    |             |             |             |
|----|-------------|-------------|-------------|
| O  | -5.04912400 | -4.51627100 | -0.57098200 |
| O  | -1.47907200 | -2.45383800 | 0.60539100  |
| O  | -0.51231700 | -4.38483600 | 1.19240400  |
| H  | 0.31780100  | -3.89809400 | -2.26188100 |
| C  | -4.14677700 | -0.96667400 | -1.08061200 |
| C  | -4.90547400 | -2.16346300 | -0.91244800 |
| C  | -6.29944200 | -2.08060300 | -0.75322900 |
| C  | -6.98683200 | -0.86971700 | -0.82417000 |
| C  | -6.23400000 | 0.29634400  | -1.05649400 |
| C  | -4.34113000 | -3.53531200 | -0.99388200 |
| C  | 0.14372500  | -3.47892400 | 3.68211900  |
| C  | -0.77298000 | -3.16173600 | 1.41885700  |
| H  | 0.93371700  | -3.78021900 | 5.67281000  |
| C  | 6.42526700  | -0.71614500 | -2.72450200 |
| H  | -6.83610500 | -3.01314200 | -0.57439600 |
| H  | 0.10759000  | -4.54029400 | 3.43391000  |
| H  | 4.14782500  | -3.49654200 | -0.78009700 |
| H  | 4.12476900  | -1.33217700 | -1.84638900 |
| H  | 6.06846100  | -2.76347100 | -2.16927200 |
| H  | 5.65233400  | -0.68954300 | -3.49835900 |
| H  | 7.38094900  | -0.93032600 | -3.20843300 |
| H  | -5.61862500 | 5.08328900  | 0.60797600  |
| H  | -6.75260700 | 1.25108900  | -1.16410900 |
| Zn | 0.81898100  | 3.37368400  | -0.25433300 |
| Zn | -1.64346800 | -0.33678100 | 0.43791200  |
| Zn | 1.43054200  | 0.42669000  | 0.94571800  |
| O  | 1.95196800  | 1.61997200  | -0.54965600 |
| O  | 0.22651100  | -0.51077500 | -0.58288000 |
| O  | -0.27954500 | -1.36441100 | -2.57584600 |
| O  | -0.35505200 | 4.97959700  | 0.16706900  |
| O  | -0.76502200 | 2.14417900  | -0.20292800 |
| O  | -2.60211800 | 1.39712400  | 0.75343100  |
| O  | -0.32003000 | -0.26669700 | 1.97379700  |
| O  | 0.96789700  | 3.45946600  | 1.92978300  |
| O  | 2.02891800  | 1.55532700  | 2.54285000  |
| O  | 4.29668000  | -0.52396900 | 3.02080700  |
| O  | 4.75236400  | 0.06021000  | 0.89476800  |
| C  | 2.21705900  | 1.25239900  | -1.80208100 |
| C  | 1.50039000  | 0.21845800  | -2.47666700 |
| C  | 1.85284800  | -0.12337900 | -3.79448200 |
| C  | 2.91815200  | 0.47988800  | -4.45985600 |
| C  | 3.63203900  | 1.48151000  | -3.77399100 |
| C  | 3.29029900  | 1.86204600  | -2.48888600 |
| C  | 0.42970500  | -0.59359900 | -1.85355600 |
| C  | -1.69977100 | 4.94672000  | 0.24380100  |
| C  | -2.45846700 | 3.74993100  | 0.41196700  |

|   |             |             |             |
|---|-------------|-------------|-------------|
| C | -3.85243500 | 3.83279200  | 0.57118500  |
| C | -4.53982600 | 5.04367700  | 0.50024200  |
| C | -3.78703100 | 6.20964900  | 0.26789800  |
| C | -4.85443900 | 0.25399800  | -1.17901600 |
| C | -1.89416200 | 2.37799000  | 0.33051000  |
| C | -0.14144000 | -1.17048400 | 2.92668700  |
| C | -0.26802600 | -2.57169600 | 2.69066500  |
| C | 0.61904300  | -3.06193800 | 4.92522900  |
| C | 0.65059800  | -1.67626000 | 5.17821100  |
| C | 0.27576300  | -0.75525500 | 4.21346300  |
| C | 1.67402800  | 2.75165800  | 2.74326900  |
| C | 4.07622100  | -0.48243200 | 1.81580400  |
| C | 2.86991300  | -2.19747200 | 0.33638900  |
| C | 4.23929300  | -2.57230000 | -0.20469200 |
| C | 6.14050400  | -1.78463100 | -1.68235500 |
| C | 7.19796800  | -1.82196600 | -0.59023300 |
| H | 1.25116000  | -0.88711200 | -4.28869700 |
| H | 3.86088500  | 2.62606600  | -1.96069000 |
| H | -4.38909900 | 2.90025200  | 0.75001600  |
| H | -4.28130000 | 1.16173700  | -1.36730600 |
| H | 0.97157500  | -1.32542000 | 6.16098400  |
| H | 0.30277400  | 0.31600800  | 4.41560500  |
| H | 2.45873100  | -3.10989700 | 0.77297300  |
| H | 2.21283700  | -1.93831900 | -0.49654600 |
| H | 4.80441500  | -0.65434200 | -0.42493100 |
| H | 4.95463600  | -2.73788400 | 0.60235300  |
| H | 2.45231800  | -1.55349800 | 2.23236700  |
| H | 6.49018900  | 0.27541500  | -2.26537600 |
| H | 8.18134600  | -1.91700400 | -1.05654200 |
| H | 7.07546600  | -2.67102600 | 0.08636100  |
| H | 7.18238100  | -0.89952000 | -0.00207400 |
| N | 2.80444000  | -1.12735600 | 1.37858700  |
| N | 4.78846800  | -1.51397300 | -1.08979900 |
| H | 3.18246600  | 0.19277300  | -5.47163900 |
| H | 4.49122700  | 1.94678700  | -4.26105300 |
| H | -4.30560000 | 7.16448400  | 0.16030400  |
| O | 2.16746100  | 4.54898400  | -1.25143200 |
| H | 1.83626500  | 5.40827300  | -0.96676000 |
| C | -2.40743200 | 6.16739200  | 0.14539800  |
| H | 1.97851600  | 3.21163600  | 3.69713800  |
| H | -1.83433100 | 7.07504200  | -0.04291300 |
| H | -4.57538400 | -5.34196700 | -0.76527700 |
| H | 0.13137800  | -4.74905200 | 1.81323800  |

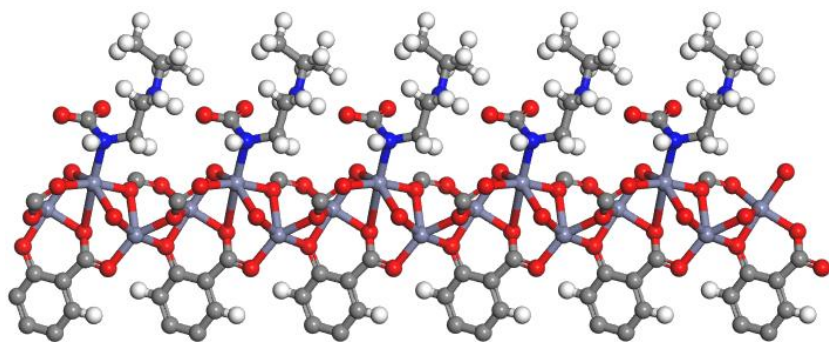

Zn-(D) Intermediate from VASP

```

1.0000000000000000
 21.2047086018530528    0.2497526695487280   -0.0656265504368033
-11.0506423441828154   18.8438051019048061   -0.0143560960060923
 -0.0287182337480707   -0.0237596005671122    6.5351662077991843

```

```

Zn   O   C   H   N
  6   20  48  32   2

```

Direct

```

0.3198156292787289   0.7391405420796247   0.8141171378060648
0.2620146806400996   0.6458667714426127   0.1788627796331710
0.3934096940671168   0.6891273012176384   0.4729039088978197
0.6962127450544529   0.3540537254341061   0.2538253332485851
0.5900512722884770   0.2906740857787113   0.9182847964299228
0.6296052179399965   0.3925829239540235   0.5855300809463486
0.4117975168931736   0.7749652635033542   0.6366941808411255
0.3693259397203406   0.7352293194417854   0.2279417015461078
0.3724290333624225   0.8183985033333201   0.0248828052792334
0.2269362538976338   0.6960058429588400   0.9797746288856644
0.2637575729208805   0.7013604284985107   0.5527022146171845
0.1782868594393392   0.6127286027727408   0.3715718509303869
0.3137588356828687   0.5999965478910809   0.3170918571334198
0.3096014237031568   0.6378480878957262   0.9014776609567434
0.3908702908337816   0.6275609226964960   0.7096592445332632
0.5623693363311872   0.7609963430000803   0.6933640289098264
0.5718661461730150   0.8304622192537963   0.4233540419194810
0.7245346703715754   0.4402319479835270   0.4375900631757119
0.6846640747287438   0.3969592223658083   0.8499800000080313
0.7747909314595987   0.4064299966381455   0.0488090481892129
0.6496079851287035   0.2614390386612442   0.1029205423601098
0.6447259729363282   0.3006972934874526   0.5151523847775721
0.5650011129201218   0.2139243269448983   0.7110607827781692
0.5403090281821434   0.3355220341413343   0.7669241333051247
0.5853923227238482   0.3398348493220169   0.1811733142232299
0.5754928497795433   0.4176205399428810   0.3789821586416053
0.4421153491393142   0.8402900308263312   0.5560473685709937
0.4308547464170900   0.8552156959261694   0.3507106642297231
0.4648118069546641   0.9255097330491182   0.2839125370784501

```

|                    |                    |                    |
|--------------------|--------------------|--------------------|
| 0.5117047869450033 | 0.9817063216562900 | 0.4092750121722304 |
| 0.5233619040535515 | 0.9661241625976515 | 0.6103258925824946 |
| 0.4894451691751982 | 0.8976985595336799 | 0.6821076987039660 |
| 0.3880030605963611 | 0.8005757538313887 | 0.1949203649714164 |
| 0.1594020081954710 | 0.6628838145462623 | 0.8987330332862200 |
| 0.1429491017495792 | 0.6362185260062176 | 0.6942304409363800 |
| 0.0701167330594643 | 0.5982651409240134 | 0.6287981177439903 |
| 0.0128845477482002 | 0.5886937817803855 | 0.7534173812204941 |
| 0.0301018830764548 | 0.6182543726067706 | 0.9513620791829780 |
| 0.1011649618296886 | 0.6542050191695310 | 0.0226664932260050 |
| 0.1981961759505069 | 0.6501318269854437 | 0.5355136942977197 |
| 0.3351877185552112 | 0.5579767792751866 | 0.2280001106351861 |
| 0.3574017080722030 | 0.5641521200143416 | 0.0199904657710235 |
| 0.3881911517260335 | 0.5240896209265813 | 0.9492592310705916 |
| 0.3949554116614635 | 0.4755918642515198 | 0.0726831858143484 |
| 0.3681380881637111 | 0.4665005834908769 | 0.2734951984688152 |
| 0.3387467785516662 | 0.5061150414596298 | 0.3491084993555162 |
| 0.3526729769510908 | 0.6130850509688131 | 0.8700788866765876 |
| 0.5498643168124815 | 0.7727037542943194 | 0.5135028896580280 |
| 0.5161847642532607 | 0.7049245221012512 | 0.1778245140510322 |
| 0.5963764432198673 | 0.7493293035185360 | 0.1182194341807445 |
| 0.7914870947640793 | 0.4757063446112042 | 0.5245016971520045 |
| 0.8080805782170373 | 0.4652270945780472 | 0.7289009805450846 |
| 0.8807276452983714 | 0.5018035050021936 | 0.7983742310623825 |
| 0.9370673305051866 | 0.5503585632244850 | 0.6770536771645865 |
| 0.9190861720931807 | 0.5624138418245792 | 0.4789643633105385 |
| 0.8484676098251711 | 0.5262321019092013 | 0.4043051575301959 |
| 0.7533749413065109 | 0.4199483271762077 | 0.8807207001043480 |
| 0.6186740131743775 | 0.1964883000427591 | 0.1868593356768073 |
| 0.5911271834657583 | 0.1807571874167380 | 0.3898833802137034 |
| 0.5554762795900743 | 0.1103128324591083 | 0.4563327084702777 |
| 0.5486149865202066 | 0.0550353263636651 | 0.3337951063820412 |
| 0.5792620322286623 | 0.0719623164558740 | 0.1373161808069057 |
| 0.6132291181745515 | 0.1405224301224948 | 0.0653045204729352 |
| 0.5998109194274832 | 0.2342756028379540 | 0.5437310542911646 |
| 0.5047745449710348 | 0.3662376654299209 | 0.8507424852180563 |
| 0.5161492860399477 | 0.3930130047731382 | 0.0549560247261809 |
| 0.4799298680145228 | 0.4286646344388387 | 0.1211912764212499 |
| 0.4306670030662474 | 0.4365348650100813 | 0.9973660776021518 |
| 0.4170671495168676 | 0.4064606690015538 | 0.7998944403525812 |
| 0.4529764256886963 | 0.3723409782917173 | 0.7282222185267102 |
| 0.5620185553020534 | 0.3838297822405821 | 0.2100954055346449 |
| 0.6860888720072040 | 0.8759047557124831 | 0.0035028669721271 |
| 0.6816746860836176 | 0.9387384506225303 | 0.9175713139038635 |
| 0.7352114216792387 | 0.8948013976807871 | 0.1920333379671320 |
| 0.4528303868521704 | 0.9347604273194179 | 0.1281256835633258 |

|                    |                    |                    |
|--------------------|--------------------|--------------------|
| 0.5612234016213762 | 0.0090347152977657 | 0.7100257883302632 |
| 0.4996094378824338 | 0.8861427363624301 | 0.8371420749078098 |
| 0.0596825925114786 | 0.5763857000787169 | 0.4741126946244165 |
| 0.9865365001598860 | 0.6137003717239935 | 0.0494138529529096 |
| 0.1139735463378742 | 0.6772896227565681 | 0.1757770564288137 |
| 0.4085314223896930 | 0.5334016616868240 | 0.7930976709461319 |
| 0.3703240000924808 | 0.4270027536764118 | 0.3707789272741309 |
| 0.3180991907179447 | 0.4988313535613997 | 0.5047045074458296 |
| 0.4962626734470916 | 0.6494929808220746 | 0.1386524887435243 |
| 0.6086640576589417 | 0.7251287893946810 | 0.9889855954081241 |
| 0.8918761167132061 | 0.4905509365211316 | 0.9527424849178203 |
| 0.9618418257901737 | 0.6018269970767562 | 0.3832182541530287 |
| 0.8351875859515232 | 0.5360752736569481 | 0.2507590165589875 |
| 0.5325812498064337 | 0.1000275409733860 | 0.6095631014963701 |
| 0.5767712282337882 | 0.0300324527424038 | 0.0404383715319412 |
| 0.6368864253484574 | 0.1530077773507941 | 0.9130476209224838 |
| 0.4922007160249038 | 0.4507854494675669 | 0.2755920235726705 |
| 0.3766029341204913 | 0.4093558907810291 | 0.7023998757887497 |
| 0.4418686911544043 | 0.3490023831637927 | 0.5754158241669529 |
| 0.4837271672836394 | 0.7212990500552081 | 0.0843339672239054 |
| 0.5806388593161103 | 0.8089478936273409 | 0.9097072660336067 |
| 0.5888347523061270 | 0.8366940270472796 | 0.1719075475674003 |
| 0.6323451961595978 | 0.7557562855348223 | 0.2478807783683692 |
| 0.5007040176517492 | 0.6668188242353779 | 0.4753762955554492 |
| 0.7045423180049184 | 0.8532925900069088 | 0.8825059063746039 |
| 0.6615084363690400 | 0.9610684426440343 | 0.0341999633422816 |
| 0.6456983024093006 | 0.9233114283233022 | 0.7824815722157297 |
| 0.7358451570012363 | 0.9802442127319324 | 0.8717732076377516 |
| 0.7894209316957657 | 0.9382458772540971 | 0.1547656646970950 |
| 0.7416099597703507 | 0.8505043081631172 | 0.2449806918327155 |
| 0.7134156334036490 | 0.9117102151990437 | 0.3189912996185882 |
| 0.5009434805937758 | 0.7075196861652344 | 0.3975908882581720 |
| 0.6096591829450588 | 0.8200130649919970 | 0.0504797952743630 |

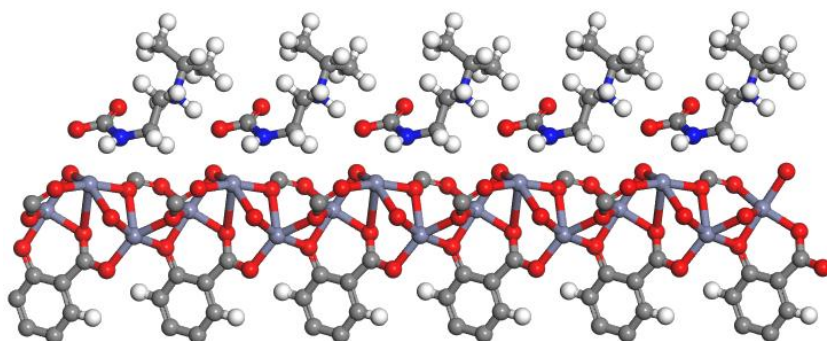

Zn-(E) TS<sub>2</sub>

|                      |                     |                    |
|----------------------|---------------------|--------------------|
| 1.000000000000000    |                     |                    |
| 21.0369461907320350  | 0.0000000000000000  | 0.0000000000000000 |
| -10.8903096176884198 | 18.9882989202970300 | 0.0000000000000000 |

-0.0975906902896443 -0.0249107290681309 6.5082880750800722

Zn O C H N  
6 20 48 32 2

Direct

|                    |                    |                    |
|--------------------|--------------------|--------------------|
| 0.3226016610494168 | 0.7430442925191123 | 0.8103853134718231 |
| 0.2646039891867745 | 0.6489733623125865 | 0.1737067214523379 |
| 0.3950045712990784 | 0.6914416680976990 | 0.4812930042864915 |
| 0.6957668848809985 | 0.3558033854780933 | 0.2523411593559404 |
| 0.5876167870353108 | 0.2898924195261522 | 0.9166107101162444 |
| 0.6267246446942767 | 0.3920532205861313 | 0.5839776244950776 |
| 0.4150381555611908 | 0.7777859579442803 | 0.6386567731956448 |
| 0.3757311192001487 | 0.7373074368898297 | 0.2277207182527039 |
| 0.3778955167996312 | 0.8203051084403150 | 0.0236458973034238 |
| 0.2299353103154566 | 0.7007635117365675 | 0.9758357302921034 |
| 0.2664471363022626 | 0.7051195974115666 | 0.5461909114704793 |
| 0.1794946158794173 | 0.6165399494707885 | 0.3656318996999133 |
| 0.3151252573818638 | 0.6018752479069979 | 0.3108175403416936 |
| 0.3111083165781559 | 0.6406144205121669 | 0.8944154289624296 |
| 0.3877587944274788 | 0.6241582241767804 | 0.6970690750913126 |
| 0.5314947397315017 | 0.7454081890894976 | 0.5679716344259578 |
| 0.5820381080580161 | 0.8192668113480648 | 0.2946629556186329 |
| 0.7220057315715125 | 0.4415377072666628 | 0.4339536933270873 |
| 0.6829582377555269 | 0.3985863782930178 | 0.8494427268915273 |
| 0.7751230209459481 | 0.4096011598574252 | 0.0479664748270039 |
| 0.6506602463379935 | 0.2636358678540383 | 0.1008047901580743 |
| 0.6446291824558111 | 0.3016176153573452 | 0.5151044527208106 |
| 0.5643415681728581 | 0.2136920289696712 | 0.7089130501587803 |
| 0.5360389905878830 | 0.3329768725713827 | 0.7629268357123999 |
| 0.5821961218363888 | 0.3382969118552105 | 0.1798876689128412 |
| 0.5712384499436156 | 0.4156185639606805 | 0.3757380724667653 |
| 0.4480139186053032 | 0.8428588163282629 | 0.5561997751789252 |
| 0.4377565627647619 | 0.8575959936875502 | 0.3486681945775881 |
| 0.4715757808994275 | 0.9276813684596411 | 0.2806336426492613 |
| 0.5179102554547033 | 0.9840637721367025 | 0.4075411396017068 |
| 0.5295277717326861 | 0.9685947035686651 | 0.6100089402660834 |
| 0.4956939828134513 | 0.9001760366974546 | 0.6827592912099404 |
| 0.3944095435767005 | 0.8026108098144791 | 0.1937849424665080 |
| 0.1616743808413010 | 0.6680283677284035 | 0.8933674728010448 |
| 0.1446322382041053 | 0.6410094556895891 | 0.6885394250664830 |
| 0.0709043144039630 | 0.6032139520846704 | 0.6232541137209981 |
| 0.0135654768804667 | 0.5941369786326843 | 0.7482055734427762 |
| 0.0315078541434855 | 0.6243904009858888 | 0.9458036522502314 |
| 0.1034205734317262 | 0.6602792327706501 | 0.0169575796983691 |
| 0.1999644181968152 | 0.6541594526305561 | 0.5293572231146892 |
| 0.3337567988647899 | 0.5581054672727266 | 0.2211163330582085 |
| 0.3550813320825244 | 0.5632885743115527 | 0.0119685922701904 |



|                    |                    |                     |
|--------------------|--------------------|---------------------|
| 0.3838305220074564 | 0.5215750283913310 | 0.9405517338984566  |
| 0.3891534023810592 | 0.4722377328634670 | 0.0646075696246648  |
| 0.3623378717852154 | 0.4636056960153732 | 0.2660788575030202  |
| 0.3349612281015585 | 0.5047987314706937 | 0.3421785795717728  |
| 0.3512754168442075 | 0.6125806209453100 | 0.8613321021958501  |
| 0.5459584756884582 | 0.7591990034554934 | 0.3755776284233838  |
| 0.5302381558155979 | 0.6982761807603965 | 0.0344362065481699  |
| 0.6095039709490816 | 0.7497171259133473 | 0.9716730779183853  |
| 0.7896250743239421 | 0.4784190339550756 | 0.5209847889359598  |
| 0.8071669291458464 | 0.4684717598127119 | 0.7263711718312347  |
| 0.8806470692148035 | 0.5061571259915156 | 0.7955850058451666  |
| 0.9367382432944934 | 0.5552089454505248 | 0.6728971574645778  |
| 0.9176632265701453 | 0.5669922306027169 | 0.4743296951466267  |
| 0.8462299703238368 | 0.5297793356905200 | 0.3999536705867724  |
| 0.7526199632951505 | 0.4226031480003701 | 0.8792749218505024  |
| 0.6212261890163933 | 0.1987980334703698 | 0.1854884383865602  |
| 0.5930903605743881 | 0.1822206424410332 | 0.3884956508082615  |
| 0.5587329555185050 | 0.1117576946283918 | 0.4548469343797074  |
| 0.5539283550100205 | 0.0574706013988432 | 0.3324288537196791  |
| 0.5854444196452444 | 0.0754132812928243 | 0.1364436148116057  |
| 0.6180783968437139 | 0.1439601541921529 | 0.0643713682042850  |
| 0.6001006876807317 | 0.2349514037787578 | 0.5424965298994704  |
| 0.4996521993316945 | 0.3630572833845218 | 0.8458308571423194  |
| 0.5112110199529762 | 0.3900531235652361 | 0.0501971580655737  |
| 0.4744348904548787 | 0.4252957111227592 | 0.1153655790758270  |
| 0.4243708365561141 | 0.4326173044591099 | 0.9901852238992512  |
| 0.4103822102849506 | 0.4021708126345883 | 0.7926636688038091  |
| 0.4468097343926344 | 0.3683458274693842 | 0.7221270275097874  |
| 0.5579159285679915 | 0.3816570982187757 | 0.2069285168037197  |
| 0.6872594533547028 | 0.8741384871504596 | 0.8294105058473858  |
| 0.6758093778781109 | 0.9273603455238646 | 0.7057272438134709  |
| 0.7379852907050460 | 0.9074510206955586 | 0.0152984983239389  |
| 0.4597123904800239 | 0.9367200398761963 | 0.1233416074868632  |
| 0.5671112465831284 | 0.0116759048893725 | 0.7106685077575651  |
| 0.5053420893368620 | 0.8887855569345382 | 0.8396489902360522  |
| 0.0598493666269999 | 0.5809077519255774 | 0.4686285987717413  |
| 0.9878691288442509 | 0.6203028018557543 | 0.0437238441549836  |
| 0.1168636928055706 | 0.6838635314977346 | 0.1698641122208908  |
| 0.4039670117701804 | 0.5304449980722100 | 0.7836429799252613  |
| 0.3630626394133241 | 0.4232681826243688 | 0.3636466548688205  |
| 0.3143005769157545 | 0.4978358053380361 | 0.4981392015420757  |
| 0.517052607774775  | 0.6444389297262116 | -0.0033061256795788 |
| 0.6259532736376650 | 0.7275805151258441 | 0.8462562753920221  |
| 0.8926693611855738 | 0.4952773265153727 | 0.9505813085804435  |
| 0.9602083208274689 | 0.6068880102507942 | 0.3779489438077153  |
| 0.8320633369186762 | 0.5392979615417197 | 0.2459099651717053  |

|                    |                    |                    |
|--------------------|--------------------|--------------------|
| 0.5351350639571776 | 0.1006073335429432 | 0.6077707907004868 |
| 0.5847790943536335 | 0.0343660155289859 | 0.0401568206382387 |
| 0.6424530722637323 | 0.1573365609138747 | 0.9125167964862516 |
| 0.4870319900384942 | 0.4477075669526444 | 0.2698540806980221 |
| 0.3693375917671792 | 0.4046749440140034 | 0.6939190185173986 |
| 0.4353959074924422 | 0.3447517600754543 | 0.5692173635331266 |
| 0.4933115726277214 | 0.7088352128034664 | 0.9379132752044002 |
| 0.577286899749536  | 0.7992016476021701 | 0.7625389123091555 |
| 0.5938962345109113 | 0.8318964880748053 | 0.0186253480930166 |
| 0.6476811668205148 | 0.7626356381014988 | 0.1019255828840955 |
| 0.4994923364317065 | 0.6534273065552322 | 0.3298458446740650 |
| 0.7091644682686213 | 0.8489979780792752 | 0.7278812473630771 |
| 0.6543690868303362 | 0.9536052886137100 | 0.8036854447802151 |
| 0.6377441632270866 | 0.9020092419192099 | 0.5756037949254872 |
| 0.7284947705703492 | 0.9680382354473498 | 0.6448389868695309 |
| 0.7906349811126713 | 0.9509355770891250 | 0.9636067433751938 |
| 0.7489650937954352 | 0.8700966474863256 | 0.0996877793274246 |
| 0.7141133059749384 | 0.9289219214684242 | 0.1229407459284123 |
| 0.5143784581389815 | 0.6987026687872065 | 0.2515842979034519 |
| 0.6133628825695872 | 0.8158322546797138 | 0.8940212823028384 |

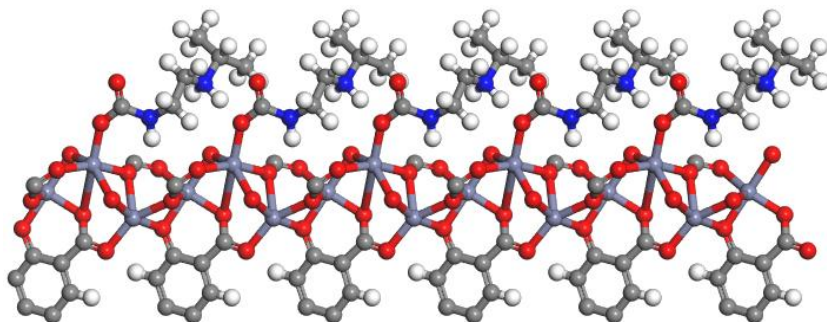

Zn-(F) Product

1.00000000000000

|                      |                     |                    |
|----------------------|---------------------|--------------------|
| 20.7993051444550048  | 0.0352024403159358  | 0.0021520845089441 |
| -11.1582362579628782 | 18.8928495231279570 | 0.0138335198209261 |
| -0.0835434969177921  | -0.0237370047184470 | 6.4897032480254335 |

Zn O C H N

6 20 48 32 2

Direct

|                    |                    |                    |
|--------------------|--------------------|--------------------|
| 0.3303044665960044 | 0.7450527720258791 | 0.7930332580301638 |
| 0.2666195885797649 | 0.6525685115822100 | 0.1609476097021982 |
| 0.4048526193238260 | 0.6914270687015573 | 0.4464141932799777 |
| 0.6942308860882775 | 0.3590934027265362 | 0.2492744430035145 |
| 0.5848611298275515 | 0.2894491696860158 | 0.9130341760640164 |
| 0.6220801401998273 | 0.3921633407579108 | 0.5810126337564299 |
| 0.4266712301215634 | 0.7779084074026201 | 0.6211510259164683 |
| 0.3802463705029524 | 0.7397683882221813 | 0.2065410799622782 |
| 0.3888882428738043 | 0.8254158660989717 | 0.0036132367249806 |
| 0.2363877663837002 | 0.7077195840043444 | 0.9631165960535242 |

|                    |                    |                    |
|--------------------|--------------------|--------------------|
| 0.2720560853755316 | 0.7119381930979856 | 0.5302913465398191 |
| 0.1814685511570673 | 0.6225978437248614 | 0.3540643290318357 |
| 0.3162232861204259 | 0.6040952512233417 | 0.2970545411873218 |
| 0.3118242593951450 | 0.6416395596776354 | 0.8785882927890185 |
| 0.3931445075344087 | 0.6284535084067002 | 0.6884627242336236 |
| 0.5117115875065892 | 0.7221608829871684 | 0.3865413209474369 |
| 0.6174506856863289 | 0.7314303132950073 | 0.2668006288311560 |
| 0.7186563311608012 | 0.4445178390532405 | 0.4301037235896601 |
| 0.6797805445457428 | 0.4004059013255485 | 0.8468643471719162 |
| 0.7746338312794805 | 0.4146864262396264 | 0.0445564293960246 |
| 0.6516365047664792 | 0.2666919339839566 | 0.0974164974488403 |
| 0.6442594502763583 | 0.3034224922867210 | 0.5131033066185751 |
| 0.5642716007286026 | 0.2133403576776729 | 0.7069820883980427 |
| 0.5299101637609667 | 0.3287492643959311 | 0.7571977069390812 |
| 0.5771835337737059 | 0.3360869389307055 | 0.1765969712633009 |
| 0.5639410020276472 | 0.4122333668048412 | 0.3709361587865061 |
| 0.4580998493546815 | 0.8435941394401070 | 0.5420203126602843 |
| 0.4471778018680865 | 0.8596227537857288 | 0.3351884961153075 |
| 0.4807035134003783 | 0.9305635417647693 | 0.2728553701575507 |
| 0.5266709645037437 | 0.9869390565175777 | 0.4029627617202820 |
| 0.5386220203304148 | 0.9706677824046537 | 0.6045460012385604 |
| 0.5056890103706166 | 0.9012896183132426 | 0.6719540110358864 |
| 0.4026189850609967 | 0.8057561845380903 | 0.1749430295817689 |
| 0.1667438299800779 | 0.6761376603568934 | 0.8822693935805646 |
| 0.1483628338618104 | 0.6487633768973211 | 0.6775106714262051 |
| 0.0731315052078187 | 0.6112796595731709 | 0.6138270176407161 |
| 0.0155848603217876 | 0.6029982545198962 | 0.7403972704803934 |
| 0.0349222918462857 | 0.6340520741299613 | 0.9375405524540383 |
| 0.1083469169592490 | 0.6696428453274521 | 0.0071068292944858 |
| 0.2038613525090014 | 0.6610839958910191 | 0.5167575978231724 |
| 0.3314449471374417 | 0.5578109146330092 | 0.2066689231254841 |
| 0.3538062128313300 | 0.5630968256084330 | 0.9975545914900437 |
| 0.3804861285994150 | 0.5196715477900042 | 0.9260567906637505 |
| 0.3819569182944065 | 0.4684258225740905 | 0.0504179667098654 |
| 0.3534129018431074 | 0.4596085637139637 | 0.2508535969211607 |
| 0.3283118519195725 | 0.5026537644038029 | 0.3271924832738264 |
| 0.3529467661441785 | 0.6141233707634015 | 0.8476851064427819 |
| 0.5540172355623270 | 0.7223837142321017 | 0.2355177012945475 |
| 0.5590144554157703 | 0.6989030366767608 | 0.8683341173051602 |
| 0.6296915990929932 | 0.7622393938507912 | 0.7863141902924440 |
| 0.7874277642776875 | 0.4832123107717905 | 0.5167219704375157 |
| 0.8058543437498500 | 0.4737733227118994 | 0.7221003179234415 |
| 0.8806502978209352 | 0.5131595626090686 | 0.7905690060687789 |
| 0.9371582722658900 | 0.5633071039724271 | 0.6668980487474627 |
| 0.9170899019849017 | 0.5747253662739169 | 0.4686137631677525 |
| 0.8443345351984419 | 0.5359438989271013 | 0.3951012074540685 |

|                    |                    |                    |
|--------------------|--------------------|--------------------|
| 0.7509610037851502 | 0.4266644851488408 | 0.8758212293220069 |
| 0.6245777461718163 | 0.2021473799359725 | 0.1824197755913914 |
| 0.5960662447498422 | 0.1843128936493628 | 0.3861842365300134 |
| 0.5637729527707904 | 0.1138075928905025 | 0.4530708917874406 |
| 0.5615113678548269 | 0.0608094624834408 | 0.3300688507246434 |
| 0.5937732642990099 | 0.0801541288077772 | 0.1337373185671638 |
| 0.6244227089555352 | 0.1487038757952206 | 0.0613006665464439 |
| 0.6008050537101894 | 0.2361397312465527 | 0.5404434472292365 |
| 0.4922678721558071 | 0.3580025334621411 | 0.8393870080783969 |
| 0.5038931179931083 | 0.3855835966267733 | 0.0435499239101631 |
| 0.4667222864178697 | 0.4208747200065091 | 0.1062544444502436 |
| 0.4163116431897294 | 0.4276102990019623 | 0.9787463454119489 |
| 0.4017557811468180 | 0.3960932365716445 | 0.7822296640146860 |
| 0.4384820020320674 | 0.3620855356152362 | 0.7141858498327593 |
| 0.5513494745232137 | 0.3783442509601045 | 0.2020475119925038 |
| 0.6779640533183979 | 0.8702441174110263 | 0.5581641535811528 |
| 0.6518764985946959 | 0.9006692583395832 | 0.3863751199937298 |
| 0.7274750000513137 | 0.9261489580057400 | 0.7168701346793540 |
| 0.4683285285886853 | 0.9403682970826566 | 0.1166184008692568 |
| 0.5754395509921437 | 0.0136189109708553 | 0.7087338014766686 |
| 0.5147559923434315 | 0.8895555128015928 | 0.8296529623132756 |
| 0.0610129797492789 | 0.5884292454177356 | 0.4593832950674326 |
| 0.9912021902593580 | 0.6306829489065109 | 0.0366163611322108 |
| 0.1228260064719109 | 0.6936956076831322 | 0.1598551271367867 |
| 0.4020186028020731 | 0.5285330828844863 | 0.7697169529659931 |
| 0.3515271971002036 | 0.4180462556061499 | 0.3481613003868844 |
| 0.3068800184951002 | 0.4959624516001497 | 0.4831758113721847 |
| 0.5736028376806033 | 0.6594120203755836 | 0.9189059165249702 |
| 0.6570859083988410 | 0.7439264267996748 | 0.6803027879286319 |
| 0.8934029269952575 | 0.5025930122958329 | 0.9454741984546686 |
| 0.9599001689654543 | 0.6154720705116716 | 0.3715235920240687 |
| 0.8293386341620419 | 0.5452064246299599 | 0.2414003083632394 |
| 0.5395310325799585 | 0.1015943546988183 | 0.6063460106805323 |
| 0.5951892245971351 | 0.0401699888485894 | 0.0373990214209314 |
| 0.6494202188726348 | 0.1632522209101808 | 0.9092312932622448 |
| 0.4796806918556840 | 0.4442694121004109 | 0.2599488755853869 |
| 0.3603781519237188 | 0.3981869341208082 | 0.6819446294176785 |
| 0.4269856795217706 | 0.3379546332864720 | 0.5615861768533179 |
| 0.5168699166625643 | 0.6752538175039362 | 0.7442583091674848 |
| 0.5709955423846225 | 0.7753135699500646 | 0.5465385961961218 |
| 0.5847238695740415 | 0.8279165669510178 | 0.7513516232393087 |
| 0.6678450859836076 | 0.7925409035898099 | 0.9129941643252266 |
| 0.4723264905609170 | 0.7044334532941150 | 0.0224597256156471 |
| 0.7072086015886185 | 0.8455237300163247 | 0.4889674787939811 |
| 0.6229413794083811 | 0.9267321371863915 | 0.4476496498435480 |
| 0.6144461411628512 | 0.8596939456427961 | 0.2766850055165335 |

|                    |                    |                    |
|--------------------|--------------------|--------------------|
| 0.7008035789927192 | 0.9403532527499365 | 0.3015080078207006 |
| 0.7753944858714092 | 0.9697910680233264 | 0.6392444661100427 |
| 0.7492885247689500 | 0.9054919471043235 | 0.8358005037106722 |
| 0.6967850281229317 | 0.9484758004389491 | 0.7924948437505677 |
| 0.5260458406490542 | 0.7164391715887461 | 0.0376532499143138 |
| 0.6116067718881553 | 0.8093485841790269 | 0.6614932023232001 |
